# Supplementary material
Source: PubMed Central journal article supplement (PMC5083095)

**Supplemental Figure 1. Blood Group Phenotype of Cultured cord reticulocytes in comparison with erythrocytes from the same cord.** Reagents and methods are shown in Griffiths et al (2012)(1). Agglutination strength recorded as - negative, w weak reaction, ++++ strong reaction. H results obtained with the lectin *Ulex europaeus*. Adult RBC and RBC from an ii adult included as controls.

|                | ABO | MN Ss   | P1   | Rh<br>c C D e E | Lu <sup>a</sup> Lu <sup>b</sup> | K k Kp <sup>b</sup> | Le <sup>a</sup> Le <sup>b</sup> | Fy <sup>a</sup> Fy <sup>b</sup> | Jk <sup>a</sup> Jk <sup>b</sup> | Co <sup>b</sup> | Ch Rg |
|----------------|-----|---------|------|-----------------|---------------------------------|---------------------|---------------------------------|---------------------------------|---------------------------------|-----------------|-------|
| Cord rbc       | O   | + - - + | ++   | +++++-          | - w                             | - + +               | - -                             | - +                             | + +                             | +               | w w   |
| Cultured cells | O   | + - - + | ++++ | +++++-          | - -                             | - + +               | - -                             | - +                             | + +                             | +               | - -   |

| Ok <sup>a</sup> | JMH | Vel |
|-----------------|-----|-----|
| +               | +   | +   |
| +               | +   | +   |

|                | I i   |
|----------------|-------|
| Cord rbc       | - +   |
| Cultured cells | + +++ |
| Adult rbc      | + -   |
| ii adult       | - +++ |

|                | P | P <sub>1</sub> | p <sup>k</sup> | LKE | H    | I i   |
|----------------|---|----------------|----------------|-----|------|-------|
| Cord rbc       | + | ++             | -              | +   | ++++ | - +   |
| Cultured cells | + | ++++           | +              | -   | ++   | + +++ |

**Supplemental Figure 2. Knockdown of BCL11A in adult erythroid cells.** Adult peripheral blood (PB) CD34<sup>+</sup> cells in erythroid culture were transduced on day 3 with shRNAs to BCL11A (B1 and B5), or scrambled shRNA (SC) as control. Cells were isolated on day 8 in culture and analysed for levels of (A) BCL11A,  $\gamma$ - and  $\beta$ -globin by western blot probed with of BCL11A (Abcam [14B5]; ab19487),  $\beta$ -globin (37-8; sc21757) and  $\gamma$ -globin (51-7; sc21756) antisera ( $\beta$ -actin served as a protein loading control), and (B) PCR for levels  $\gamma$ - and  $\beta$ -globin expression. Untransduced cells (PB cont) served as a further control. Cells transduced with shRNA B5 and scrambled shRNA at day 8 in culture were lysed, proteins subjected to tryptic digest, labelled with TMTs and analysed by nanoLC-MS/MS.

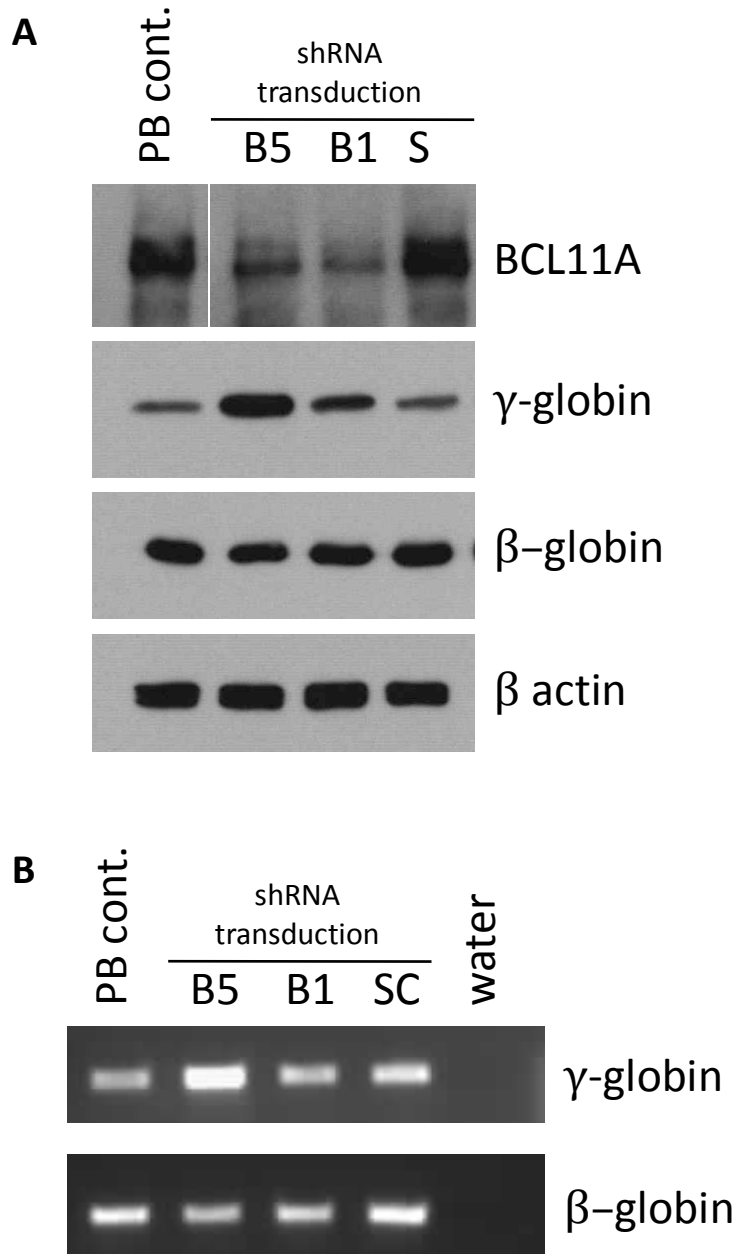

**Supplemental Figure 3. Comparing the level of selected proteins between adult and cord blood RBCs.** (A) Western blot of whole cell lysate from adult (PB) and cord blood (CB) RBCs probed with antibodies to CAI (ab34978), CAII (ab6621),  $\alpha$ -globin (D-16; sc31110), Aquaporin 1 (CHIP28), Tropomodulin 4 (ab67776), Non Muscle Myosin Heavy Chain 10 (Myosin IIB; ab684) and Glycophorin A (CVDP).  $\alpha$ -globin and Glycophorin A served as protein loading controls. (B) Abundance of proteins in western blot shown in (A) expressed as ratio of level in adult (PB) to cord (CB) RBC.

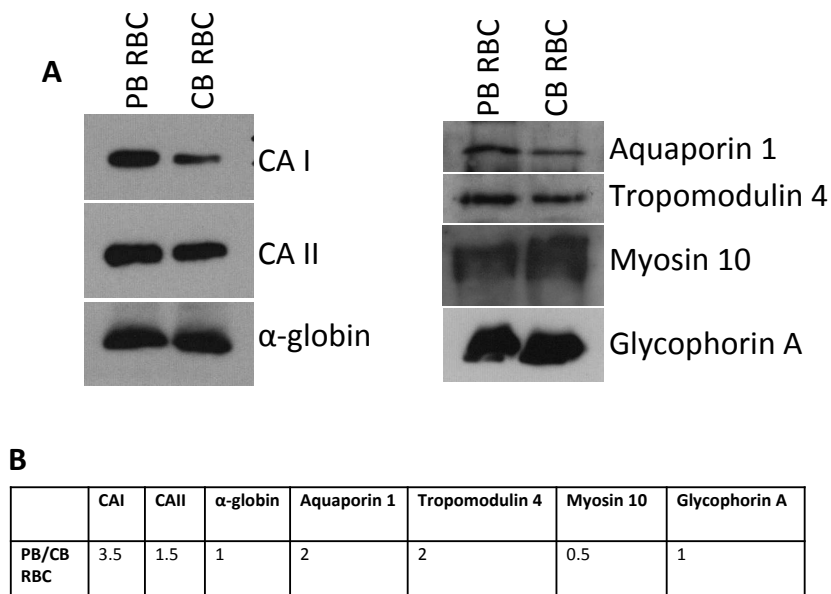

**Supplemental Figure 4. Change in protein level between autologous reticulocyte and RBC cytosol and membrane fractions.** Adult RBCs and peripheral blood CD34<sup>+</sup> cells were isolated from the same Leukocyte Reduction cones. Reticulocytes were differentiated *in vitro* from the CD34<sup>+</sup> cells. The RBCs and reticulocytes were separated into cytosolic and membrane fractions. (A) Western blots (3μg membrane fraction, 100μg cytosol fraction) were probed with antibodies to Glycophorin A (CVDP), Band 3 (BRIC170) and Ankyrin 1 (BRIC274). (B) Abundance of Glycophorin A, Band 3 and Ankyrin 1 in western blot shown in (A). Y-axis represents the difference in protein level between RBCs and reticulocytes

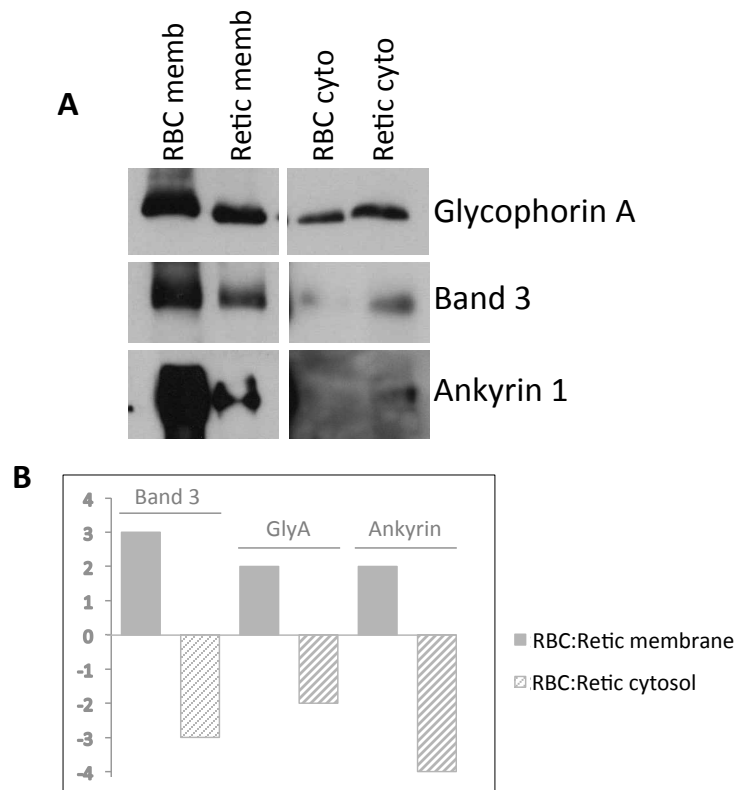

Supplement: 10.1074_M115.057315_mcp.M115.057315-1.pdf [file 10.1074_M115.057315_mcp.M115.057315-1.pdf]
