# Supplementary material
Source: PubMed Central journal article supplement (PMC5083095)
Supplement: 10.1074_M115.057315_mcp.M115.057315-2.pdf [file 10.1074_M115.057315_mcp.M115.057315-2.pdf]

**Supplemental Table 1. Details of peptides identified by MS in membrane (A) and cytosol (B) fractions.** In the membrane fraction peptides from adult reticulocytes were labelled with TMT<sup>6</sup>-129, adult RBCs TMT<sup>6</sup>-128, cord reticulocytes TMT<sup>6</sup>-127, cord RBCs TMT<sup>6</sup>-126, additional cord reticulocyte sample TMT<sup>6</sup>-131, additional cord RBC sample TMT<sup>6</sup>-130. In the cytosol fraction peptides from adult reticulocytes were labelled with TMT<sup>6</sup>-127, adult RBCs TMT<sup>6</sup>-129, cord reticulocytes TMT<sup>6</sup>-126, cord RBCs TMT<sup>6</sup>-131, additional cord reticulocyte sample TMT<sup>6</sup>-128, additional cord RBC sample TMT<sup>6</sup>-130.
