# Supplementary material
Source: PubMed Central journal article supplement (PMC5083095)
Supplement: 10.1074_M115.057315_mcp.M115.057315-5.pdf [file 10.1074_M115.057315_mcp.M115.057315-5.pdf]

**Supplemental Table 2A. Proteins detected in the membrane fraction of Human RBCs.**

| Accession | Description                                                                                                  |
|-----------|--------------------------------------------------------------------------------------------------------------|
| P31946    | 14-3-3 protein beta/alpha OS=Homo sapiens GN=YWHAB PE=1 SV=3 - [1433B_HUMAN]                                 |
| P62258    | 14-3-3 protein epsilon OS=Homo sapiens GN=YWHAE PE=1 SV=1 - [1433E_HUMAN]                                    |
| Q04917    | 14-3-3 protein eta OS=Homo sapiens GN=YWHAH PE=1 SV=4 - [1433F_HUMAN]                                        |
| P61981    | 14-3-3 protein gamma OS=Homo sapiens GN=YWHAG PE=1 SV=2 - [1433G_HUMAN]                                      |
| P27348    | 14-3-3 protein theta OS=Homo sapiens GN=YWHAQ PE=1 SV=1 - [1433T_HUMAN]                                      |
| P63104    | 14-3-3 protein zeta/delta OS=Homo sapiens GN=YWHAZ PE=1 SV=1 - [1433Z_HUMAN]                                 |
| Q9NUQ2    | 1-acyl-sn-glycerol-3-phosphate acyltransferase epsilon OS=Homo sapiens GN=AGPAT5 PE=1 SV=3 - [PLCE_HUMAN]    |
| Q4AC99    | 1-aminocyclopropane-1-carboxylate synthase-like protein 2 OS=Homo sapiens GN=ACCSL PE=2 SV=3 - [1A1L2_HUMAN] |
| P09543    | 2',3'-cyclic-nucleotide 3'-phosphodiesterase OS=Homo sapiens GN=CNP PE=1 SV=2 - [CN37_HUMAN]                 |
| P62333    | 26S protease regulatory subunit 10B OS=Homo sapiens GN=PSMC6 PE=1 SV=1 - [PRS10_HUMAN]                       |
| P62191    | 26S protease regulatory subunit 4 OS=Homo sapiens GN=PSMC1 PE=1 SV=1 - [PRS4_HUMAN]                          |
| P17980    | 26S protease regulatory subunit 6A OS=Homo sapiens GN=PSMC3 PE=1 SV=3 - [PRS6A_HUMAN]                        |
| P43686    | 26S protease regulatory subunit 6B OS=Homo sapiens GN=PSMC4 PE=1 SV=2 - [PRS6B_HUMAN]                        |
| P35998    | 26S protease regulatory subunit 7 OS=Homo sapiens GN=PSMC2 PE=1 SV=3 - [PRS7_HUMAN]                          |
| Q99460    | 26S proteasome non-ATPase regulatory subunit 1 OS=Homo sapiens GN=PSMD1 PE=1 SV=2 - [PSMD1_HUMAN]            |
| O00231    | 26S proteasome non-ATPase regulatory subunit 11 OS=Homo sapiens GN=PSMD11 PE=1 SV=3 - [PSD11_HUMAN]          |
| O00232    | 26S proteasome non-ATPase regulatory subunit 12 OS=Homo sapiens GN=PSMD12 PE=1 SV=3 - [PSD12_HUMAN]          |
| Q9UNM6    | 26S proteasome non-ATPase regulatory subunit 13 OS=Homo sapiens GN=PSMD13 PE=1 SV=2 - [PSD13_HUMAN]          |
| O00487    | 26S proteasome non-ATPase regulatory subunit 14 OS=Homo sapiens GN=PSMD14 PE=1 SV=1 - [PSDE_HUMAN]           |
| P55036    | 26S proteasome non-ATPase regulatory subunit 4 OS=Homo sapiens GN=PSMD4 PE=1 SV=1 - [PSMD4_HUMAN]            |
| Q15008    | 26S proteasome non-ATPase regulatory subunit 6 OS=Homo sapiens GN=PSMD6 PE=1 SV=1 - [PSMD6_HUMAN]            |
| P48556    | 26S proteasome non-ATPase regulatory subunit 8 OS=Homo sapiens GN=PSMD8 PE=1 SV=2 - [PSMD8_HUMAN]            |
| Q13442    | 28 kDa heat- and acid-stable phosphoprotein OS=Homo sapiens GN=PDAP1 PE=1 SV=1 - [HAP28_HUMAN]               |
| P82909    | 28S ribosomal protein S36, mitochondrial OS=Homo sapiens GN=MRPS36 PE=1 SV=2 - [RT36_HUMAN]                  |
| P82933    | 28S ribosomal protein S9, mitochondrial OS=Homo sapiens GN=MRPS9 PE=1 SV=2 - [RT09_HUMAN]                    |
| Q96RE3    | 36 kDa muscleblind protein EXP36 OS=Homo sapiens GN=MBNL1 PE=2 SV=1 - [Q96RE3_HUMAN]                         |
| P52815    | 39S ribosomal protein L12, mitochondrial OS=Homo sapiens GN=MRPL12 PE=1 SV=2 - [RM12_HUMAN]                  |
| Q9P035    | 3-hydroxyacyl-CoA dehydratase 3 OS=Homo sapiens GN=PTPLAD1 PE=1 SV=2 - [HACD3_HUMAN]                         |
| Q99714    | 3-hydroxyacyl-CoA dehydrogenase type-2 OS=Homo sapiens GN=HSD17B10 PE=1 SV=3 - [HCD2_HUMAN]                  |
| P42765    | 3-ketoacyl-CoA thiolase, mitochondrial OS=Homo sapiens GN=ACAA2 PE=1 SV=2 - [THIM_HUMAN]                     |
| P46783    | 40S ribosomal protein S10 OS=Homo sapiens GN=RPS10 PE=1 SV=1 - [RS10_HUMAN]                                  |
| P62280    | 40S ribosomal protein S11 OS=Homo sapiens GN=RPS11 PE=1 SV=3 - [RS11_HUMAN]                                  |
| P25398    | 40S ribosomal protein S12 OS=Homo sapiens GN=RPS12 PE=1 SV=3 - [RS12_HUMAN]                                  |
| P62277    | 40S ribosomal protein S13 OS=Homo sapiens GN=RPS13 PE=1 SV=2 - [RS13_HUMAN]                                  |
| P62263    | 40S ribosomal protein S14 OS=Homo sapiens GN=RPS14 PE=1 SV=3 - [RS14_HUMAN]                                  |
| P62841    | 40S ribosomal protein S15 OS=Homo sapiens GN=RPS15 PE=1 SV=2 - [RS15_HUMAN]                                  |
| P62244    | 40S ribosomal protein S15a OS=Homo sapiens GN=RPS15A PE=1 SV=2 - [RS15A_HUMAN]                               |
| P62249    | 40S ribosomal protein S16 OS=Homo sapiens GN=RPS16 PE=1 SV=2 - [RS16_HUMAN]                                  |
| P0CW22    | 40S ribosomal protein S17-like OS=Homo sapiens GN=RPS17L PE=3 SV=1 - [RS17L_HUMAN]                           |
| P62269    | 40S ribosomal protein S18 OS=Homo sapiens GN=RPS18 PE=1 SV=3 - [RS18_HUMAN]                                  |
| P39019    | 40S ribosomal protein S19 OS=Homo sapiens GN=RPS19 PE=1 SV=2 - [RS19_HUMAN]                                  |
| P15880    | 40S ribosomal protein S2 OS=Homo sapiens GN=RPS2 PE=1 SV=2 - [RS2_HUMAN]                                     |
| P60866    | 40S ribosomal protein S20 OS=Homo sapiens GN=RPS20 PE=1 SV=1 - [RS20_HUMAN]                                  |

|        |                                                                                                               |
|--------|---------------------------------------------------------------------------------------------------------------|
| Q8WVC2 | 40S ribosomal protein S21 OS=Homo sapiens GN=RPS21 PE=2 SV=1 - [Q8WVC2_HUMAN]                                 |
| P62266 | 40S ribosomal protein S23 OS=Homo sapiens GN=RPS23 PE=1 SV=3 - [RS23_HUMAN]                                   |
| Q5TOP8 | 40S ribosomal protein S24 OS=Homo sapiens GN=RPS24 PE=2 SV=1 - [Q5TOP8_HUMAN]                                 |
| P62851 | 40S ribosomal protein S25 OS=Homo sapiens GN=RPS25 PE=1 SV=1 - [RS25_HUMAN]                                   |
| P62854 | 40S ribosomal protein S26 OS=Homo sapiens GN=RPS26 PE=1 SV=3 - [RS26_HUMAN]                                   |
| P42677 | 40S ribosomal protein S27 OS=Homo sapiens GN=RPS27 PE=1 SV=3 - [RS27_HUMAN]                                   |
| P62857 | 40S ribosomal protein S28 OS=Homo sapiens GN=RPS28 PE=1 SV=1 - [RS28_HUMAN]                                   |
| P62273 | 40S ribosomal protein S29 OS=Homo sapiens GN=RPS29 PE=1 SV=2 - [RS29_HUMAN]                                   |
| P23396 | 40S ribosomal protein S3 OS=Homo sapiens GN=RPS3 PE=1 SV=2 - [RS3_HUMAN]                                      |
| P62861 | 40S ribosomal protein S30 OS=Homo sapiens GN=FAU PE=1 SV=1 - [RS30_HUMAN]                                     |
| P61247 | 40S ribosomal protein S3a OS=Homo sapiens GN=RPS3A PE=1 SV=2 - [RS3A_HUMAN]                                   |
| P62701 | 40S ribosomal protein S4, X isoform OS=Homo sapiens GN=RPS4X PE=1 SV=2 - [RS4X_HUMAN]                         |
| P46782 | 40S ribosomal protein S5 OS=Homo sapiens GN=RPS5 PE=1 SV=4 - [RS5_HUMAN]                                      |
| P62753 | 40S ribosomal protein S6 OS=Homo sapiens GN=RPS6 PE=1 SV=1 - [RS6_HUMAN]                                      |
| P62081 | 40S ribosomal protein S7 OS=Homo sapiens GN=RPS7 PE=1 SV=1 - [RS7_HUMAN]                                      |
| P46781 | 40S ribosomal protein S9 OS=Homo sapiens GN=RPS9 PE=1 SV=3 - [RS9_HUMAN]                                      |
| P49189 | 4-trimethylaminobutyraldehyde dehydrogenase OS=Homo sapiens GN=ALDH9A1 PE=1 SV=3 - [AL9A1_HUMAN]              |
| Q8IZH2 | 5'-3' exoribonuclease 1 OS=Homo sapiens GN=XRN1 PE=1 SV=1 - [XRN1_HUMAN]                                      |
| Q13131 | 5'-AMP-activated protein kinase catalytic subunit alpha-1 OS=Homo sapiens GN=PRKAA1 PE=1 SV=4 - [AAPK1_HUMAN] |
| P54619 | 5'-AMP-activated protein kinase subunit gamma-1 OS=Homo sapiens GN=PRKAG1 PE=1 SV=1 - [AAKG1_HUMAN]           |
| Q86UY8 | 5'-nucleotidase domain-containing protein 3 OS=Homo sapiens GN=NT5DC3 PE=2 SV=1 - [NT5D3_HUMAN]               |
| P10809 | 60 kDa heat shock protein, mitochondrial OS=Homo sapiens GN=HSPD1 PE=1 SV=2 - [CH60_HUMAN]                    |
| P05387 | 60S acidic ribosomal protein P2 OS=Homo sapiens GN=RPLP2 PE=1 SV=1 - [RLA2_HUMAN]                             |
| P27635 | 60S ribosomal protein L10 OS=Homo sapiens GN=RPL10 PE=1 SV=4 - [RL10_HUMAN]                                   |
| P62906 | 60S ribosomal protein L10a OS=Homo sapiens GN=RPL10A PE=1 SV=2 - [RL10A_HUMAN]                                |
| P30050 | 60S ribosomal protein L12 OS=Homo sapiens GN=RPL12 PE=1 SV=1 - [RL12_HUMAN]                                   |
| P26373 | 60S ribosomal protein L13 OS=Homo sapiens GN=RPL13 PE=1 SV=4 - [RL13_HUMAN]                                   |
| P40429 | 60S ribosomal protein L13a OS=Homo sapiens GN=RPL13A PE=1 SV=2 - [RL13A_HUMAN]                                |
| P50914 | 60S ribosomal protein L14 OS=Homo sapiens GN=RPL14 PE=1 SV=4 - [RL14_HUMAN]                                   |
| P18621 | 60S ribosomal protein L17 OS=Homo sapiens GN=RPL17 PE=1 SV=3 - [RL17_HUMAN]                                   |
| Q07020 | 60S ribosomal protein L18 OS=Homo sapiens GN=RPL18 PE=1 SV=2 - [RL18_HUMAN]                                   |
| P84098 | 60S ribosomal protein L19 OS=Homo sapiens GN=RPL19 PE=1 SV=1 - [RL19_HUMAN]                                   |
| P46778 | 60S ribosomal protein L21 OS=Homo sapiens GN=RPL21 PE=1 SV=2 - [RL21_HUMAN]                                   |
| P35268 | 60S ribosomal protein L22 OS=Homo sapiens GN=RPL22 PE=1 SV=2 - [RL22_HUMAN]                                   |
| P62829 | 60S ribosomal protein L23 OS=Homo sapiens GN=RPL23 PE=1 SV=1 - [RL23_HUMAN]                                   |
| P62750 | 60S ribosomal protein L23a OS=Homo sapiens GN=RPL23A PE=1 SV=1 - [RL23A_HUMAN]                                |
| P61254 | 60S ribosomal protein L26 OS=Homo sapiens GN=RPL26 PE=1 SV=1 - [RL26_HUMAN]                                   |
| P61353 | 60S ribosomal protein L27 OS=Homo sapiens GN=RPL27 PE=1 SV=2 - [RL27_HUMAN]                                   |
| P46779 | 60S ribosomal protein L28 OS=Homo sapiens GN=RPL28 PE=1 SV=3 - [RL28_HUMAN]                                   |
| P47914 | 60S ribosomal protein L29 OS=Homo sapiens GN=RPL29 PE=1 SV=2 - [RL29_HUMAN]                                   |
| P39023 | 60S ribosomal protein L3 OS=Homo sapiens GN=RPL3 PE=1 SV=2 - [RL3_HUMAN]                                      |
| P62888 | 60S ribosomal protein L30 OS=Homo sapiens GN=RPL30 PE=1 SV=2 - [RL30_HUMAN]                                   |
| P49207 | 60S ribosomal protein L34 OS=Homo sapiens GN=RPL34 PE=1 SV=3 - [RL34_HUMAN]                                   |

|        |                                                                                                                   |
|--------|-------------------------------------------------------------------------------------------------------------------|
| P42766 | 60S ribosomal protein L35 OS=Homo sapiens GN=RPL35 PE=1 SV=2 - [RL35_HUMAN]                                       |
| Q9Y3U8 | 60S ribosomal protein L36 OS=Homo sapiens GN=RPL36 PE=1 SV=3 - [RL36_HUMAN]                                       |
| P83881 | 60S ribosomal protein L36a OS=Homo sapiens GN=RPL36A PE=1 SV=2 - [RL36A_HUMAN]                                    |
| P63173 | 60S ribosomal protein L38 OS=Homo sapiens GN=RPL38 PE=1 SV=2 - [RL38_HUMAN]                                       |
| P36578 | 60S ribosomal protein L4 OS=Homo sapiens GN=RPL4 PE=1 SV=5 - [RL4_HUMAN]                                          |
| Q02878 | 60S ribosomal protein L6 OS=Homo sapiens GN=RPL6 PE=1 SV=3 - [RL6_HUMAN]                                          |
| P18124 | 60S ribosomal protein L7 OS=Homo sapiens GN=RPL7 PE=1 SV=1 - [RL7_HUMAN]                                          |
| P62424 | 60S ribosomal protein L7a OS=Homo sapiens GN=RPL7A PE=1 SV=2 - [RL7A_HUMAN]                                       |
| P17858 | 6-phosphofructokinase, liver type OS=Homo sapiens GN=PFKL PE=1 SV=6 - [K6PL_HUMAN]                                |
| P08237 | 6-phosphofructokinase, muscle type OS=Homo sapiens GN=PFKM PE=1 SV=2 - [K6PF_HUMAN]                               |
| F5H7U0 | 6-phosphogluconate dehydrogenase, decarboxylating OS=Homo sapiens GN=PGD PE=3 SV=1 - [F5H7U0_HUMAN]               |
| P11021 | 78 kDa glucose-regulated protein OS=Homo sapiens GN=HSPA5 PE=1 SV=2 - [GRP78_HUMAN]                               |
| D2K8Q1 | AAA domain containing 3A protein OS=Homo sapiens GN=ATAD3A PE=2 SV=1 - [D2K8Q1_HUMAN]                             |
| Q2L6I2 | ABC50 protein OS=Homo sapiens GN=ABCF1 PE=2 SV=1 - [Q2L6I2_HUMAN]                                                 |
| P24752 | Acetyl-CoA acetyltransferase, mitochondrial OS=Homo sapiens GN=ACAT1 PE=1 SV=1 - [THIL_HUMAN]                     |
| Q92688 | Acidic leucine-rich nuclear phosphoprotein 32 family member B OS=Homo sapiens GN=ANP32B PE=1 SV=1 - [AN32B_HUMAN] |
| Q5VZA6 | Aconitase 1, soluble OS=Homo sapiens GN=ACO1 PE=2 SV=1 - [Q5VZA6_HUMAN]                                           |
| P60709 | Actin, cytoplasmic 1 OS=Homo sapiens GN=ACTB PE=1 SV=1 - [ACTB_HUMAN]                                             |
| P63267 | Actin, gamma-enteric smooth muscle OS=Homo sapiens GN=ACTG2 PE=1 SV=1 - [ACTH_HUMAN]                              |
| P61160 | Actin-related protein 2 OS=Homo sapiens GN=ACTR2 PE=1 SV=1 - [ARP2_HUMAN]                                         |
| O15143 | Actin-related protein 2/3 complex subunit 1B OS=Homo sapiens GN=ARPC1B PE=1 SV=3 - [ARC1B_HUMAN]                  |
| O15144 | Actin-related protein 2/3 complex subunit 2 OS=Homo sapiens GN=ARPC2 PE=1 SV=1 - [ARPC2_HUMAN]                    |
| P59998 | Actin-related protein 2/3 complex subunit 4 OS=Homo sapiens GN=ARPC4 PE=1 SV=3 - [ARPC4_HUMAN]                    |
| B1ALC0 | Actin-related protein 2/3 complex subunit 5 OS=Homo sapiens GN=ARPC5 PE=3 SV=1 - [B1ALC0_HUMAN]                   |
| Q9BPX5 | Actin-related protein 2/3 complex subunit 5-like protein OS=Homo sapiens GN=ARPC5L PE=1 SV=1 - [ARP5L_HUMAN]      |
| Q9H9F9 | Actin-related protein 5 OS=Homo sapiens GN=ACTR5 PE=1 SV=2 - [ARP5_HUMAN]                                         |
| Q7LC44 | Activity-regulated cytoskeleton-associated protein OS=Homo sapiens GN=ARC PE=1 SV=1 - [ARC_HUMAN]                 |
| O14561 | Acyl carrier protein, mitochondrial OS=Homo sapiens GN=NDUFAB1 PE=1 SV=3 - [ACPM_HUMAN]                           |
| P13798 | Acylamino-acid-releasing enzyme OS=Homo sapiens GN=APEH PE=1 SV=4 - [ACPH_HUMAN]                                  |
| Q9H845 | Acyl-CoA dehydrogenase family member 9, mitochondrial OS=Homo sapiens GN=ACAD9 PE=1 SV=1 - [ACAD9_HUMAN]          |
| Q5JWV8 | Acyl-CoA synthetase long-chain family member 4 OS=Homo sapiens GN=ACSL4 PE=2 SV=1 - [Q5JWV8_HUMAN]                |
| Q6E213 | Acyl-CoA wax alcohol acyltransferase 2 OS=Homo sapiens GN=AWAT2 PE=1 SV=1 - [AWAT2_HUMAN]                         |
| Q92604 | Acyl-CoA:lysophosphatidylglycerol acyltransferase 1 OS=Homo sapiens GN=LPGAT1 PE=2 SV=1 - [LGAT1_HUMAN]           |
| P82987 | ADAMTS-like protein 3 OS=Homo sapiens GN=ADAMTSL3 PE=2 SV=4 - [ATL3_HUMAN]                                        |
| Q86XM2 | ADD1 protein OS=Homo sapiens GN=ADD1 PE=2 SV=1 - [Q86XM2_HUMAN]                                                   |
| A2A3N8 | Adducin 1 (Alpha) OS=Homo sapiens GN=ADD1 PE=4 SV=1 - [A2A3N8_HUMAN]                                              |
| F5H737 | Adenosylhomocysteinase OS=Homo sapiens GN=AHCY PE=3 SV=1 - [F5H737_HUMAN]                                         |
| P00568 | Adenylate kinase isoenzyme 1 OS=Homo sapiens GN=AK1 PE=1 SV=3 - [KAD1_HUMAN]                                      |
| P30566 | Adenylosuccinate lyase OS=Homo sapiens GN=ADSL PE=1 SV=2 - [PUR8_HUMAN]                                           |
| F5H6Z3 | Adenylyl cyclase-associated protein OS=Homo sapiens GN=CAP1 PE=3 SV=1 - [F5H6Z3_HUMAN]                            |
| Q9HDC9 | Adipocyte plasma membrane-associated protein OS=Homo sapiens GN=APMAP PE=1 SV=2 - [APMAP_HUMAN]                   |
| P05141 | ADP/ATP translocase 2 OS=Homo sapiens GN=SLC25A5 PE=1 SV=7 - [ADT2_HUMAN]                                         |
| P12236 | ADP/ATP translocase 3 OS=Homo sapiens GN=SLC25A6 PE=1 SV=4 - [ADT3_HUMAN]                                         |

|        |                                                                                                                            |
|--------|----------------------------------------------------------------------------------------------------------------------------|
| P62330 | ADP-ribosylation factor 6 OS=Homo sapiens GN=ARF6 PE=1 SV=2 - [ARF6_HUMAN]                                                 |
| Q9NVJ2 | ADP-ribosylation factor-like protein 8B OS=Homo sapiens GN=ARL8B PE=1 SV=1 - [ARL8B_HUMAN]                                 |
| Q9Y4W6 | AFG3-like protein 2 OS=Homo sapiens GN=AFG3L2 PE=1 SV=2 - [AFG32_HUMAN]                                                    |
| P49588 | Alanyl-tRNA synthetase, cytoplasmic OS=Homo sapiens GN=AARS PE=1 SV=2 - [SYAC_HUMAN]                                       |
| Q8IZ83 | Aldehyde dehydrogenase family 16 member A1 OS=Homo sapiens GN=ALDH16A1 PE=1 SV=2 - [A16A1_HUMAN]                           |
| Q9H6U8 | Alpha-1,2-mannosyltransferase ALG9 OS=Homo sapiens GN=ALG9 PE=1 SV=2 - [ALG9_HUMAN]                                        |
| Q9H553 | Alpha-1,3/1,6-mannosyltransferase ALG2 OS=Homo sapiens GN=ALG2 PE=2 SV=1 - [ALG2_HUMAN]                                    |
| P01023 | Alpha-2-macroglobulin OS=Homo sapiens GN=A2M PE=1 SV=3 - [A2MG_HUMAN]                                                      |
| P61163 | Alpha-centractin OS=Homo sapiens GN=ACTR1A PE=1 SV=1 - [ACTZ_HUMAN]                                                        |
| P06733 | Alpha-enolase OS=Homo sapiens GN=ENO1 PE=1 SV=2 - [ENOA_HUMAN]                                                             |
| Q9NZD4 | Alpha-hemoglobin-stabilizing protein OS=Homo sapiens GN=AHSP PE=1 SV=1 - [AHSP_HUMAN]                                      |
| P54920 | Alpha-soluble NSF attachment protein OS=Homo sapiens GN=NAPA PE=1 SV=3 - [SNAA_HUMAN]                                      |
| Q12904 | Aminoacyl tRNA synthase complex-interacting multifunctional protein 1 OS=Homo sapiens GN=AIMP1 PE=1 SV=2 - [AIMP1_HUMAN]   |
| A2RU49 | Aminoglycoside phosphotransferase domain-containing protein 1 OS=Homo sapiens GN=AGPHD1 PE=2 SV=2 - [AGPD1_HUMAN]          |
| A8K6C4 | Aminolevulinate, delta-, synthase 2 OS=Homo sapiens GN=ALAS2 PE=2 SV=1 - [A8K6C4_HUMAN]                                    |
| P04920 | Anion exchange protein 2 OS=Homo sapiens GN=SLC4A2 PE=1 SV=4 - [B3A2_HUMAN]                                                |
| Q6PK32 | ANK1 protein OS=Homo sapiens GN=ANK1 PE=2 SV=1 - [Q6PK32_HUMAN]                                                            |
| Q53ER1 | Ankyrin 1 isoform 5 variant (Fragment) OS=Homo sapiens GN=ANK1 PE=2 SV=1 - [Q53ER1_HUMAN]                                  |
| Q5T457 | Ankyrin repeat domain 2 (Stretch responsive muscle) OS=Homo sapiens GN=ANKRD2 PE=2 SV=1 - [Q5T457_HUMAN]                   |
| Q6UB99 | Ankyrin repeat domain-containing protein 11 OS=Homo sapiens GN=ANKRD11 PE=1 SV=3 - [ANR11_HUMAN]                           |
| Q4UJ75 | Ankyrin repeat domain-containing protein 20A4 OS=Homo sapiens GN=ANKRD20A4 PE=2 SV=1 - [A20A4_HUMAN]                       |
| Q96NW4 | Ankyrin repeat domain-containing protein 27 OS=Homo sapiens GN=ANKRD27 PE=1 SV=2 - [ANR27_HUMAN]                           |
| Q9BQI6 | Ankyrin repeat domain-containing protein 32 OS=Homo sapiens GN=ANKRD32 PE=1 SV=2 - [ANR32_HUMAN]                           |
| Q12955 | Ankyrin-3 OS=Homo sapiens GN=ANK3 PE=1 SV=3 - [ANK3_HUMAN]                                                                 |
| Q10567 | AP-1 complex subunit beta-1 OS=Homo sapiens GN=AP1B1 PE=1 SV=2 - [AP1B1_HUMAN]                                             |
| O43747 | AP-1 complex subunit gamma-1 OS=Homo sapiens GN=AP1G1 PE=1 SV=5 - [AP1G1_HUMAN]                                            |
| O95782 | AP-2 complex subunit alpha-1 OS=Homo sapiens GN=AP2A1 PE=1 SV=3 - [AP2A1_HUMAN]                                            |
| P63010 | AP-2 complex subunit beta OS=Homo sapiens GN=AP2B1 PE=1 SV=1 - [AP2B1_HUMAN]                                               |
| P53680 | AP-2 complex subunit sigma OS=Homo sapiens GN=AP2S1 PE=1 SV=2 - [AP2S1_HUMAN]                                              |
| Q2M2I8 | AP2-associated protein kinase 1 OS=Homo sapiens GN=AAK1 PE=1 SV=3 - [AAK1_HUMAN]                                           |
| O95236 | Apolipoprotein L3 OS=Homo sapiens GN=APOL3 PE=2 SV=3 - [APOL3_HUMAN]                                                       |
| O95831 | Apoptosis-inducing factor 1, mitochondrial OS=Homo sapiens GN=AIFM1 PE=1 SV=1 - [AIFM1_HUMAN]                              |
| P18054 | Arachidonate 12-lipoxygenase, 12S-type OS=Homo sapiens GN=ALOX12 PE=1 SV=4 - [LOX12_HUMAN]                                 |
| P52594 | Arf-GAP domain and FG repeats-containing protein 1 OS=Homo sapiens GN=AGFG1 PE=1 SV=2 - [AGFG1_HUMAN]                      |
| O95081 | Arf-GAP domain and FG repeats-containing protein 2 OS=Homo sapiens GN=AGFG2 PE=1 SV=2 - [AGFG2_HUMAN]                      |
| Q15057 | Arf-GAP with coiled-coil, ANK repeat and PH domain-containing protein 2 OS=Homo sapiens GN=ACAP2 PE=1 SV=3 - [ACAP2_HUMAN] |
| Q99490 | Arf-GAP with GTPase, ANK repeat and PH domain-containing protein 2 OS=Homo sapiens GN=AGAP2 PE=1 SV=2 - [AGAP2_HUMAN]      |
| Q9ULH1 | Arf-GAP with SH3 domain, ANK repeat and PH domain-containing protein 1 OS=Homo sapiens GN=ASAP1 PE=1 SV=4 - [ASAP1_HUMAN]  |
| P05089 | Arginase-1 OS=Homo sapiens GN=ARG1 PE=1 SV=2 - [ARGI1_HUMAN]                                                               |
| P78540 | Arginase-2, mitochondrial OS=Homo sapiens GN=ARG2 PE=1 SV=1 - [ARGI2_HUMAN]                                                |
| B7Z637 | Armadillo repeat containing 8, isoform CRA_g OS=Homo sapiens GN=ARMC8 PE=2 SV=1 - [B7Z637_HUMAN]                           |
| O43776 | Asparaginyl-tRNA synthetase, cytoplasmic OS=Homo sapiens GN=NARS PE=1 SV=1 - [SYNC_HUMAN]                                  |
| P00505 | Aspartate aminotransferase, mitochondrial OS=Homo sapiens GN=GOT2 PE=1 SV=3 - [AATM_HUMAN]                                 |

|        |                                                                                                                          |
|--------|--------------------------------------------------------------------------------------------------------------------------|
| P14868 | Aspartyl-tRNA synthetase, cytoplasmic OS=Homo sapiens GN=DARS PE=1 SV=2 - [SYDC_HUMAN]                                   |
| Q6PI48 | Aspartyl-tRNA synthetase, mitochondrial OS=Homo sapiens GN=DARS2 PE=1 SV=1 - [SYDM_HUMAN]                                |
| O43313 | ATM interactor OS=Homo sapiens GN=ATMIN PE=1 SV=2 - [ATMIN_HUMAN]                                                        |
| B4DL14 | ATP synthase gamma chain OS=Homo sapiens GN=ATP5C1 PE=2 SV=1 - [B4DL14_HUMAN]                                            |
| P25705 | ATP synthase subunit alpha, mitochondrial OS=Homo sapiens GN=ATP5A1 PE=1 SV=1 - [ATPA_HUMAN]                             |
| P06576 | ATP synthase subunit beta, mitochondrial OS=Homo sapiens GN=ATP5B PE=1 SV=3 - [ATPB_HUMAN]                               |
| O75947 | ATP synthase subunit d, mitochondrial OS=Homo sapiens GN=ATP5H PE=1 SV=3 - [ATP5H_HUMAN]                                 |
| P30049 | ATP synthase subunit delta, mitochondrial OS=Homo sapiens GN=ATP5D PE=1 SV=2 - [ATPD_HUMAN]                              |
| P56385 | ATP synthase subunit e, mitochondrial OS=Homo sapiens GN=ATP5I PE=1 SV=2 - [ATP5I_HUMAN]                                 |
| P56381 | ATP synthase subunit epsilon, mitochondrial OS=Homo sapiens GN=ATP5E PE=1 SV=2 - [ATP5E_HUMAN]                           |
| P48047 | ATP synthase subunit O, mitochondrial OS=Homo sapiens GN=ATP5O PE=1 SV=1 - [ATPO_HUMAN]                                  |
| Q5QNZ2 | ATP synthase, H+ transporting, mitochondrial F0 complex, subunit B1 OS=Homo sapiens GN=ATP5F1 PE=2 SV=1 - [Q5QNZ2_HUMAN] |
| P18859 | ATP synthase-coupling factor 6, mitochondrial OS=Homo sapiens GN=ATP5J PE=1 SV=1 - [ATP5J_HUMAN]                         |
| Q96QE3 | ATPase family AAA domain-containing protein 5 OS=Homo sapiens GN=ATAD5 PE=1 SV=4 - [ATAD5_HUMAN]                         |
| Q9UII2 | ATPase inhibitor, mitochondrial OS=Homo sapiens GN=ATPIF1 PE=1 SV=1 - [ATIF1_HUMAN]                                      |
| B1AKY9 | ATPase, Na+/K+ transporting, alpha 2 (+) polypeptide OS=Homo sapiens GN=ATP1A2 PE=3 SV=1 - [B1AKY9_HUMAN]                |
| Q86UK0 | ATP-binding cassette sub-family A member 12 OS=Homo sapiens GN=ABCA12 PE=1 SV=3 - [ABCAC_HUMAN]                          |
| O94911 | ATP-binding cassette sub-family A member 8 OS=Homo sapiens GN=ABCA8 PE=1 SV=3 - [ABCA8_HUMAN]                            |
| Q9NRK6 | ATP-binding cassette sub-family B member 10, mitochondrial OS=Homo sapiens GN=ABCB10 PE=1 SV=2 - [ABCBA_HUMAN]           |
| Q9NP58 | ATP-binding cassette sub-family B member 6, mitochondrial OS=Homo sapiens GN=ABCB6 PE=1 SV=1 - [ABCB6_HUMAN]             |
| P61221 | ATP-binding cassette sub-family E member 1 OS=Homo sapiens GN=ABCE1 PE=1 SV=1 - [ABCE1_HUMAN]                            |
| Q5STZ8 | ATP-binding cassette sub-family F (GCN20) member 1 (Fragment) OS=Homo sapiens GN=ABCF1 PE=2 SV=2 - [Q5STZ8_HUMAN]        |
| Q9UNQ0 | ATP-binding cassette sub-family G member 2 OS=Homo sapiens GN=ABCG2 PE=1 SV=3 - [ABCG2_HUMAN]                            |
| A4D1D5 | ATP-binding cassette, sub-family B (MDR/TAP), member 4 OS=Homo sapiens GN=ABCB4 PE=3 SV=1 - [A4D1D5_HUMAN]               |
| P53396 | ATP-citrate synthase OS=Homo sapiens GN=ACLY PE=1 SV=3 - [ACLY_HUMAN]                                                    |
| Q08211 | ATP-dependent RNA helicase A OS=Homo sapiens GN=DHX9 PE=1 SV=4 - [DHX9_HUMAN]                                            |
| Q7Z478 | ATP-dependent RNA helicase DHX29 OS=Homo sapiens GN=DHX29 PE=1 SV=2 - [DHX29_HUMAN]                                      |
| Q4LE39 | AT-rich interactive domain-containing protein 4B OS=Homo sapiens GN=ARID4B PE=1 SV=2 - [ARI4B_HUMAN]                     |
| P02730 | Band 3 anion transport protein OS=Homo sapiens GN=SLC4A1 PE=1 SV=3 - [B3AT_HUMAN]                                        |
| P50895 | Basal cell adhesion molecule OS=Homo sapiens GN=BCAM PE=1 SV=2 - [BCAM_HUMAN]                                            |
| Q54A51 | Basigin (OK blood group), isoform CRA_a OS=Homo sapiens GN=hEMMPRIN PE=2 SV=1 - [Q54A51_HUMAN]                           |
| P51572 | B-cell receptor-associated protein 31 OS=Homo sapiens GN=BCAP31 PE=1 SV=3 - [BAP31_HUMAN]                                |
| Q5TE63 | BCL2-like 1 OS=Homo sapiens GN=BCL2L1 PE=2 SV=1 - [Q5TE63_HUMAN]                                                         |
| P35612 | Beta-adducin OS=Homo sapiens GN=ADD2 PE=1 SV=3 - [ADDB_HUMAN]                                                            |
| P07686 | Beta-hexosaminidase subunit beta OS=Homo sapiens GN=HEXB PE=1 SV=3 - [HEXB_HUMAN]                                        |
| A1A5D9 | Bicaudal D-related protein 2 OS=Homo sapiens GN=CCDC64B PE=2 SV=2 - [BICR2_HUMAN]                                        |
| P07814 | Bifunctional aminoacyl-tRNA synthetase OS=Homo sapiens GN=EPRS PE=1 SV=5 - [SYEP_HUMAN]                                  |
| P53004 | Biliverdin reductase A OS=Homo sapiens GN=BLVRA PE=1 SV=2 - [BIEA_HUMAN]                                                 |
| P78537 | Biogenesis of lysosome-related organelles complex 1 subunit 1 OS=Homo sapiens GN=BLOC1S1 PE=1 SV=2 - [BL1S1_HUMAN]       |
| P07738 | Bisphosphoglycerate mutase OS=Homo sapiens GN=BPGM PE=1 SV=2 - [PMGE_HUMAN]                                              |
| Q13867 | Bleomycin hydrolase OS=Homo sapiens GN=BLMH PE=1 SV=1 - [BLMH_HUMAN]                                                     |
| Q02161 | Blood group Rh(D) polypeptide OS=Homo sapiens GN=RHD PE=1 SV=3 - [RHD_HUMAN]                                             |
| Q9NSY1 | BMP-2-inducible protein kinase OS=Homo sapiens GN=BMP2K PE=1 SV=2 - [BMP2K_HUMAN]                                        |

|        |                                                                                                                                                                    |
|--------|--------------------------------------------------------------------------------------------------------------------------------------------------------------------|
| Q8TDC3 | BR serine/threonine-protein kinase 1 OS=Homo sapiens GN=BRSK1 PE=1 SV=1 - [BRSK1_HUMAN]                                                                            |
| Q5R3B4 | Brain protein 44 (Fragment) OS=Homo sapiens GN=BRP44 PE=2 SV=1 - [Q5R3B4_HUMAN]                                                                                    |
| Q9NWW8 | BRISC and BRCA1-A complex member 1 OS=Homo sapiens GN=BABAM1 PE=1 SV=1 - [BABA1_HUMAN]                                                                             |
| Q15018 | BRISC complex subunit Abro1 OS=Homo sapiens GN=FAM175B PE=1 SV=2 - [F175B_HUMAN]                                                                                   |
| Q14681 | BTB/POZ domain-containing protein KCTD2 OS=Homo sapiens GN=KCTD2 PE=1 SV=3 - [KCTD2_HUMAN]                                                                         |
| P11586 | C-1-tetrahydrofolate synthase, cytoplasmic OS=Homo sapiens GN=MTHFD1 PE=1 SV=3 - [C1TC_HUMAN]                                                                      |
| O14523 | C2 domain-containing protein 2-like OS=Homo sapiens GN=C2CD2L PE=1 SV=3 - [C2C2L_HUMAN]                                                                            |
| A6H8M8 | C4A protein OS=Homo sapiens GN=C4A PE=2 SV=1 - [A6H8M8_HUMAN]                                                                                                      |
| P27708 | CAD protein OS=Homo sapiens GN=CAD PE=1 SV=3 - [PYR1_HUMAN]                                                                                                        |
| Q99828 | Calcium and integrin-binding protein 1 OS=Homo sapiens GN=CIB1 PE=1 SV=4 - [CIB1_HUMAN]                                                                            |
| Q9Y376 | Calcium-binding protein 39 OS=Homo sapiens GN=CAB39 PE=1 SV=1 - [CAB39_HUMAN]                                                                                      |
| B2ZWH1 | Calcyclin binding protein (Fragment) OS=Homo sapiens GN=CACYBP PE=4 SV=1 - [B2ZWH1_HUMAN]                                                                          |
| P62158 | Calmodulin OS=Homo sapiens GN=CALM1 PE=1 SV=2 - [CALM_HUMAN]                                                                                                       |
| Q5T5Y3 | Calmodulin-regulated spectrin-associated protein 1 OS=Homo sapiens GN=CAMSAP1 PE=1 SV=2 - [CAMP1_HUMAN]                                                            |
| P27824 | Calnexin OS=Homo sapiens GN=CANX PE=1 SV=2 - [CALX_HUMAN]                                                                                                          |
| P04632 | Calpain small subunit 1 OS=Homo sapiens GN=CAPNS1 PE=1 SV=1 - [CPNS1_HUMAN]                                                                                        |
| P07384 | Calpain-1 catalytic subunit OS=Homo sapiens GN=CAPN1 PE=1 SV=1 - [CAN1_HUMAN]                                                                                      |
| O15484 | Calpain-5 OS=Homo sapiens GN=CAPN5 PE=1 SV=2 - [CAN5_HUMAN]                                                                                                        |
| P27797 | Calreticulin OS=Homo sapiens GN=CALR PE=1 SV=1 - [CALR_HUMAN]                                                                                                      |
| O43852 | Calumenin OS=Homo sapiens GN=CALU PE=1 SV=2 - [CALU_HUMAN]                                                                                                         |
| P17612 | cAMP-dependent protein kinase catalytic subunit alpha OS=Homo sapiens GN=PRKACA PE=1 SV=2 - [KAPCA_HUMAN]                                                          |
| P10644 | cAMP-dependent protein kinase type I-alpha regulatory subunit OS=Homo sapiens GN=PRKAR1A PE=1 SV=1 - [KAPO_HUMAN]                                                  |
| B1AK87 | Capping protein (Actin filament) muscle Z-line, beta OS=Homo sapiens GN=CAPZB PE=4 SV=1 - [B1AK87_HUMAN]                                                           |
| D3YHP0 | CAR4/6 OS=Homo sapiens PE=2 SV=1 - [D3YHP0_HUMAN]                                                                                                                  |
| Q7L1S5 | Carbohydrate sulfotransferase 9 OS=Homo sapiens GN=CHST9 PE=2 SV=2 - [CHST9_HUMAN]                                                                                 |
| P00918 | Carbonic anhydrase 2 OS=Homo sapiens GN=CA2 PE=1 SV=2 - [CAH2_HUMAN]                                                                                               |
| A3EY21 | Cardiac sodium channel alpha subunit (Fragment) OS=Homo sapiens GN=SCN5A PE=2 SV=1 - [A3EY21_HUMAN]                                                                |
| P50416 | Carnitine O-palmitoyltransferase 1, liver isoform OS=Homo sapiens GN=CPT1A PE=1 SV=2 - [CPT1A_HUMAN]                                                               |
| P48729 | Casein kinase I isoform alpha OS=Homo sapiens GN=CSNK1A1 PE=1 SV=2 - [KC1A_HUMAN]                                                                                  |
| P67870 | Casein kinase II subunit beta OS=Homo sapiens GN=CSNK2B PE=1 SV=1 - [CSK2B_HUMAN]                                                                                  |
| P04040 | Catalase OS=Homo sapiens GN=CAT PE=1 SV=3 - [CATA_HUMAN]                                                                                                           |
| P21964 | Catechol O-methyltransferase OS=Homo sapiens GN=COMT PE=1 SV=2 - [COMT_HUMAN]                                                                                      |
| Q5JZG9 | Cathepsin A (Fragment) OS=Homo sapiens GN=CTSA PE=2 SV=1 - [Q5JZG9_HUMAN]                                                                                          |
| P07339 | Cathepsin D OS=Homo sapiens GN=CTSD PE=1 SV=1 - [CATD_HUMAN]                                                                                                       |
| P14091 | Cathepsin E OS=Homo sapiens GN=CTSE PE=1 SV=2 - [CATE_HUMAN]                                                                                                       |
| O95628 | CCR4-NOT transcription complex subunit 4 OS=Homo sapiens GN=CNOT4 PE=1 SV=3 - [CNOT4_HUMAN]                                                                        |
| Q9Y5K6 | CD2-associated protein OS=Homo sapiens GN=CD2AP PE=1 SV=1 - [CD2AP_HUMAN]                                                                                          |
| B6EAT9 | CD44 OS=Homo sapiens PE=2 SV=1 - [B6EAT9_HUMAN]                                                                                                                    |
| B1AMW1 | CD58 antigen, (Lymphocyte function-associated antigen 3), isoform CRA_c OS=Homo sapiens GN=CD58 PE=4 SV=1 - [B1AMW1_HUMAN]                                         |
| A6NIW1 | CD99 antigen, isoform CRA_b OS=Homo sapiens GN=CD99 PE=4 SV=1 - [A6NIW1_HUMAN]                                                                                     |
| Q8N5K1 | CDGSH iron-sulfur domain-containing protein 2 OS=Homo sapiens GN=CISD2 PE=1 SV=1 - [CISD2_HUMAN]                                                                   |
| B3KW52 | cDNA FLJ42145 fis, clone TESTI4000228, highly similar to Mus musculus ubiquitin family domain containing 1 (Ubf1), mRNA OS=Homo sapiens PE=2 SV=1 - [B3KW52_HUMAN] |
| B3KXX3 | cDNA FLJ46254 fis, clone TESTI4023096, highly similar to Solute carrier family 12 member 6 OS=Homo sapiens PE=2 SV=1 - [B3KXX3_HUMAN]                              |

|        |                                                                                                                                                               |
|--------|---------------------------------------------------------------------------------------------------------------------------------------------------------------|
| B7Z3E2 | cDNA FLJ50777, highly similar to Serine/threonine-protein phosphatase 6 (EC 3.1.3.16) OS=Homo sapiens PE=2 SV=1 - [B7Z3E2_HUMAN]                              |
| B4DM63 | cDNA FLJ51245, highly similar to Actin-related protein 2/3 complex subunit 3 OS=Homo sapiens PE=2 SV=1 - [B4DM63_HUMAN]                                       |
| B4DEW9 | cDNA FLJ52478, highly similar to Eukaryotic translation initiation factor 3 subunit 5 OS=Homo sapiens PE=2 SV=1 - [B4DEW9_HUMAN]                              |
| B7Z3Q0 | cDNA FLJ52550 OS=Homo sapiens PE=2 SV=1 - [B7Z3Q0_HUMAN]                                                                                                      |
| B4DS57 | cDNA FLJ53176, highly similar to Nuclear autoantigenic sperm protein OS=Homo sapiens PE=2 SV=1 - [B4DS57_HUMAN]                                               |
| B4DPJ6 | cDNA FLJ53635, highly similar to Homo sapiens tumor protein D52-like 2 (TPD52L2), transcript variant 6, mRNA OS=Homo sapiens PE=2 SV=1 - [B4DPJ6_HUMAN]       |
| B4DW31 | cDNA FLJ54186, highly similar to Nuclear receptor-binding protein OS=Homo sapiens PE=2 SV=1 - [B4DW31_HUMAN]                                                  |
| B7Z934 | cDNA FLJ55302, highly similar to Transcription factor COE2 OS=Homo sapiens PE=2 SV=1 - [B7Z934_HUMAN]                                                         |
| B7Z4B8 | cDNA FLJ56481, highly similar to Heterogeneous nuclear ribonucleoprotein U-like protein 1 OS=Homo sapiens PE=2 SV=1 - [B7Z4B8_HUMAN]                          |
| B4DLT2 | cDNA FLJ56637, highly similar to Nuclear pore complex protein Nup155 OS=Homo sapiens PE=2 SV=1 - [B4DLT2_HUMAN]                                               |
| B4DK60 | cDNA FLJ57515, highly similar to CDK5 and ABL1 enzyme substrate 1 OS=Homo sapiens PE=2 SV=1 - [B4DK60_HUMAN]                                                  |
| B4DZV5 | cDNA FLJ58820, highly similar to 55 kDa erythrocyte membrane protein (p55) OS=Homo sapiens PE=2 SV=1 - [B4DZV5_HUMAN]                                         |
| B4DH26 | cDNA FLJ60517, highly similar to DCN1-like protein 4 OS=Homo sapiens PE=2 SV=1 - [B4DH26_HUMAN]                                                               |
| B4DN00 | cDNA FLJ60715, highly similar to Pyruvate carboxylase, mitochondrial (EC 6.4.1.1) OS=Homo sapiens PE=2 SV=1 - [B4DN00_HUMAN]                                  |
| B4DQQ8 | cDNA FLJ60806, highly similar to RalBP1-associated Eps domain-containing protein 2 OS=Homo sapiens PE=2 SV=1 - [B4DQQ8_HUMAN]                                 |
| B7Z1T7 | cDNA FLJ61691, highly similar to Homo sapiens myosin head domain containing 1 (MYOHD1), transcript variant 2, mRNA OS=Homo sapiens PE=2 SV=1 - [B7Z1T7_HUMAN] |
| Q8NBU8 | cDNA FLJ90737 fis, clone PLACE1010827, moderately similar to Membrane protein p24B OS=Homo sapiens PE=2 SV=1 - [Q8NBU8_HUMAN]                                 |
| Q9NV96 | Cell cycle control protein 50A OS=Homo sapiens GN=TMEM30A PE=1 SV=1 - [CC50A_HUMAN]                                                                           |
| P60953 | Cell division control protein 42 homolog OS=Homo sapiens GN=CDC42 PE=1 SV=2 - [CDC42_HUMAN]                                                                   |
| Q99741 | Cell division control protein 6 homolog OS=Homo sapiens GN=CDC6 PE=1 SV=1 - [CDC6_HUMAN]                                                                      |
| Q9NX58 | Cell growth-regulating nucleolar protein OS=Homo sapiens GN=LYAR PE=1 SV=2 - [LYAR_HUMAN]                                                                     |
| P49454 | Centromere protein F OS=Homo sapiens GN=CENPF PE=1 SV=2 - [CENPF_HUMAN]                                                                                       |
| Q02224 | Centromere-associated protein E OS=Homo sapiens GN=CENPE PE=1 SV=2 - [CENPE_HUMAN]                                                                            |
| Q5JVD6 | Centrosomal protein 110kDa (Fragment) OS=Homo sapiens GN=CEP110 PE=2 SV=1 - [Q5JVD6_HUMAN]                                                                    |
| O15078 | Centrosomal protein of 290 kDa OS=Homo sapiens GN=CEP290 PE=1 SV=2 - [CE290_HUMAN]                                                                            |
| B7ZAT2 | Chaperonin containing TCP1, subunit 2 (Beta), isoform CRA_c OS=Homo sapiens GN=CCT2 PE=2 SV=1 - [B7ZAT2_HUMAN]                                                |
| B7Z4T9 | Chaperonin containing TCP1, subunit 7 (Eta), isoform CRA_c OS=Homo sapiens GN=CCT7 PE=2 SV=1 - [B7Z4T9_HUMAN]                                                 |
| Q9HD42 | Charged multivesicular body protein 1a OS=Homo sapiens GN=CHMP1A PE=1 SV=1 - [CHM1A_HUMAN]                                                                    |
| Q7LBR1 | Charged multivesicular body protein 1b OS=Homo sapiens GN=CHMP1B PE=1 SV=1 - [CHM1B_HUMAN]                                                                    |
| O43633 | Charged multivesicular body protein 2a OS=Homo sapiens GN=CHMP2A PE=1 SV=1 - [CHM2A_HUMAN]                                                                    |
| Q9H444 | Charged multivesicular body protein 4b OS=Homo sapiens GN=CHMP4B PE=1 SV=1 - [CHM4B_HUMAN]                                                                    |
| Q96FZ7 | Charged multivesicular body protein 6 OS=Homo sapiens GN=CHMP6 PE=1 SV=3 - [CHMP6_HUMAN]                                                                      |
| Q9BWS9 | Chitinase domain-containing protein 1 OS=Homo sapiens GN=CHID1 PE=1 SV=1 - [CHID1_HUMAN]                                                                      |
| P06276 | Cholinesterase OS=Homo sapiens GN=BCHE PE=1 SV=1 - [CHLE_HUMAN]                                                                                               |
| C9J5P1 | Chromosome 6 open reading frame 130, isoform CRA_a OS=Homo sapiens GN=C6orf130 PE=4 SV=1 - [C9J5P1_HUMAN]                                                     |
| Q5JVC0 | Citrate lyase beta like (Fragment) OS=Homo sapiens GN=CLYBL PE=2 SV=1 - [Q5JVC0_HUMAN]                                                                        |
| B4DJV2 | Citrate synthase OS=Homo sapiens GN=CS PE=2 SV=1 - [B4DJV2_HUMAN]                                                                                             |
| Q00610 | Clathrin heavy chain 1 OS=Homo sapiens GN=CLTC PE=1 SV=5 - [CLH1_HUMAN]                                                                                       |
| Q14677 | Clathrin interactor 1 OS=Homo sapiens GN=CLINT1 PE=1 SV=1 - [EPN4_HUMAN]                                                                                      |
| P09497 | Clathrin light chain B OS=Homo sapiens GN=CLTB PE=1 SV=1 - [CLCB_HUMAN]                                                                                       |
| Q10570 | Cleavage and polyadenylation specificity factor subunit 1 OS=Homo sapiens GN=CPSF1 PE=1 SV=2 - [CPSF1_HUMAN]                                                  |
| P53621 | Coatomer subunit alpha OS=Homo sapiens GN=COPA PE=1 SV=2 - [COPA_HUMAN]                                                                                       |
| P53618 | Coatomer subunit beta OS=Homo sapiens GN=COPB1 PE=1 SV=3 - [COPB_HUMAN]                                                                                       |



|        |                                                                                                                                       |
|--------|---------------------------------------------------------------------------------------------------------------------------------------|
| P48444 | Coatomer subunit delta OS=Homo sapiens GN=ARCN1 PE=1 SV=1 - [COPD_HUMAN]                                                              |
| Q9UBF2 | Coatomer subunit gamma-2 OS=Homo sapiens GN=COPG2 PE=1 SV=1 - [COPG2_HUMAN]                                                           |
| Q6P1N0 | Coiled-coil and C2 domain-containing protein 1A OS=Homo sapiens GN=CC2D1A PE=1 SV=1 - [C2D1A_HUMAN]                                   |
| Q96CT7 | Coiled-coil domain-containing protein 124 OS=Homo sapiens GN=CCDC124 PE=1 SV=1 - [CC124_HUMAN]                                        |
| Q2TAC2 | Coiled-coil domain-containing protein 57 OS=Homo sapiens GN=CCDC57 PE=2 SV=2 - [CCD57_HUMAN]                                          |
| Q16204 | Coiled-coil domain-containing protein 6 OS=Homo sapiens GN=CCDC6 PE=1 SV=2 - [CCDC6_HUMAN]                                            |
| Q6P9F0 | Coiled-coil domain-containing protein 62 OS=Homo sapiens GN=CCDC62 PE=1 SV=2 - [CCD62_HUMAN]                                          |
| Q8NA47 | Coiled-coil domain-containing protein 63 OS=Homo sapiens GN=CCDC63 PE=1 SV=1 - [CCD63_HUMAN]                                          |
| Q9Y2S6 | Coiled-coil domain-containing protein 72 OS=Homo sapiens GN=CCDC72 PE=1 SV=1 - [CCD72_HUMAN]                                          |
| Q8IWF9 | Coiled-coil domain-containing protein 83 OS=Homo sapiens GN=CCDC83 PE=2 SV=2 - [CCD83_HUMAN]                                          |
| Q8NCU4 | Coiled-coil domain-containing protein KIAA1407 OS=Homo sapiens GN=KIAA1407 PE=2 SV=1 - [K1407_HUMAN]                                  |
| Q9NX63 | Coiled-coil-helix-coiled-coil-helix domain-containing protein 3, mitochondrial OS=Homo sapiens GN=CHCHD3 PE=1 SV=1 - [CHCH3_HUMAN]    |
| Q8IZC6 | Collagen alpha-1(XVII) chain OS=Homo sapiens GN=COL27A1 PE=1 SV=1 - [CORA1_HUMAN]                                                     |
| A2A2Y8 | Collagen, type XVII, alpha 1 OS=Homo sapiens GN=COL17A1 PE=4 SV=1 - [A2A2Y8_HUMAN]                                                    |
| Q9BXJ0 | Complement C1q tumor necrosis factor-related protein 5 OS=Homo sapiens GN=C1QTNF5 PE=1 SV=1 - [C1QT5_HUMAN]                           |
| Q07021 | Complement component 1 Q subcomponent-binding protein, mitochondrial OS=Homo sapiens GN=C1QBP PE=1 SV=1 - [C1QBP_HUMAN]               |
| Q9BPX3 | Condensin complex subunit 3 OS=Homo sapiens GN=NCAPG PE=1 SV=1 - [CND3_HUMAN]                                                         |
| A8K1H6 | COP9 constitutive photomorphogenic homolog subunit 8 (Arabidopsis), isoform CRA_b OS=Homo sapiens GN=COPS8 PE=2 SV=1 - [A8K1H6_HUMAN] |
| Q13098 | COP9 signalosome complex subunit 1 OS=Homo sapiens GN=GPS1 PE=1 SV=4 - [CSN1_HUMAN]                                                   |
| P61201 | COP9 signalosome complex subunit 2 OS=Homo sapiens GN=COPS2 PE=1 SV=1 - [CSN2_HUMAN]                                                  |
| Q9BT78 | COP9 signalosome complex subunit 4 OS=Homo sapiens GN=COPS4 PE=1 SV=1 - [CSN4_HUMAN]                                                  |
| Q92905 | COP9 signalosome complex subunit 5 OS=Homo sapiens GN=COPS5 PE=1 SV=4 - [CSN5_HUMAN]                                                  |
| Q9H9Q2 | COP9 signalosome complex subunit 7b OS=Homo sapiens GN=COPS7B PE=1 SV=1 - [CSN7B_HUMAN]                                               |
| Q04656 | Copper-transporting ATPase 1 OS=Homo sapiens GN=ATP7A PE=1 SV=3 - [ATP7A_HUMAN]                                                       |
| P36551 | Coproporphyrinogen-III oxidase, mitochondrial OS=Homo sapiens GN=CPOX PE=1 SV=3 - [HEM6_HUMAN]                                        |
| P31146 | Coronin-1A OS=Homo sapiens GN=CORO1A PE=1 SV=4 - [COR1A_HUMAN]                                                                        |
| Q9ULV4 | Coronin-1C OS=Homo sapiens GN=CORO1C PE=1 SV=1 - [COR1C_HUMAN]                                                                        |
| Q9NRF8 | CTP synthase 2 OS=Homo sapiens GN=CTPS2 PE=1 SV=1 - [PYRG2_HUMAN]                                                                     |
| Q2HIY8 | CTSC protein OS=Homo sapiens GN=CTSC PE=2 SV=1 - [Q2HIY8_HUMAN]                                                                       |
| Q5T2B5 | Cullin 2 OS=Homo sapiens GN=CUL2 PE=2 SV=1 - [Q5T2B5_HUMAN]                                                                           |
| Q13618 | Cullin-3 OS=Homo sapiens GN=CUL3 PE=1 SV=2 - [CUL3_HUMAN]                                                                             |
| Q13620 | Cullin-4B OS=Homo sapiens GN=CUL4B PE=1 SV=4 - [CUL4B_HUMAN]                                                                          |
| Q93034 | Cullin-5 OS=Homo sapiens GN=CUL5 PE=1 SV=4 - [CUL5_HUMAN]                                                                             |
| Q86VP6 | Cullin-associated NEDD8-dissociated protein 1 OS=Homo sapiens GN=CAND1 PE=1 SV=2 - [CAND1_HUMAN]                                      |
| Q14028 | Cyclic nucleotide-gated cation channel beta-1 OS=Homo sapiens GN=CNGB1 PE=1 SV=2 - [CNGB1_HUMAN]                                      |
| Q15078 | Cyclin-dependent kinase 5 activator 1 OS=Homo sapiens GN=CDK5R1 PE=1 SV=1 - [CD5R1_HUMAN]                                             |
| Q9NZV1 | Cysteine-rich motor neuron 1 protein OS=Homo sapiens GN=CRIM1 PE=1 SV=1 - [CRIM1_HUMAN]                                               |
| A8MVQ3 | Cysteinyl-tRNA synthetase, isoform CRA_b OS=Homo sapiens GN=CARS PE=2 SV=1 - [A8MVQ3_HUMAN]                                           |
| P00167 | Cytochrome b5 OS=Homo sapiens GN=CYB5A PE=1 SV=2 - [CYB5_HUMAN]                                                                       |
| P31930 | Cytochrome b-c1 complex subunit 1, mitochondrial OS=Homo sapiens GN=UQCRC1 PE=1 SV=3 - [QCR1_HUMAN]                                   |
| P22695 | Cytochrome b-c1 complex subunit 2, mitochondrial OS=Homo sapiens GN=UQCRC2 PE=1 SV=3 - [QCR2_HUMAN]                                   |
| P07919 | Cytochrome b-c1 complex subunit 6, mitochondrial OS=Homo sapiens GN=UQCRH PE=1 SV=2 - [QCR6_HUMAN]                                    |
| O14949 | Cytochrome b-c1 complex subunit 8 OS=Homo sapiens GN=UQCRQ PE=1 SV=4 - [QCR8_HUMAN]                                                   |

|        |                                                                                                                                                                   |
|--------|-------------------------------------------------------------------------------------------------------------------------------------------------------------------|
| P47985 | Cytochrome b-c1 complex subunit Rieske, mitochondrial OS=Homo sapiens GN=UQCRFS1 PE=1 SV=2 - [UCRI_HUMAN]                                                         |
| Q14061 | Cytochrome c oxidase copper chaperone OS=Homo sapiens GN=COX17 PE=1 SV=2 - [COX17_HUMAN]                                                                          |
| P00403 | Cytochrome c oxidase subunit 2 OS=Homo sapiens GN=MT-CO2 PE=1 SV=1 - [COX2_HUMAN]                                                                                 |
| P13073 | Cytochrome c oxidase subunit 4 isoform 1, mitochondrial OS=Homo sapiens GN=COX4I1 PE=1 SV=1 - [COX41_HUMAN]                                                       |
| P20674 | Cytochrome c oxidase subunit 5A, mitochondrial OS=Homo sapiens GN=COX5A PE=1 SV=2 - [COX5A_HUMAN]                                                                 |
| P10606 | Cytochrome c oxidase subunit 5B, mitochondrial OS=Homo sapiens GN=COX5B PE=1 SV=2 - [COX5B_HUMAN]                                                                 |
| P14854 | Cytochrome c oxidase subunit 6B1 OS=Homo sapiens GN=COX6B1 PE=1 SV=2 - [CX6B1_HUMAN]                                                                              |
| P09669 | Cytochrome c oxidase subunit 6C OS=Homo sapiens GN=COX6C PE=1 SV=2 - [COX6C_HUMAN]                                                                                |
| P08574 | Cytochrome c1, heme protein, mitochondrial OS=Homo sapiens GN=CYC1 PE=1 SV=3 - [CY1_HUMAN]                                                                        |
| P53701 | Cytochrome c-type heme lyase OS=Homo sapiens GN=HCCS PE=1 SV=1 - [CCHL_HUMAN]                                                                                     |
| Q5VXH9 | Cytochrome P450, family 26, subfamily A, polypeptide 1 OS=Homo sapiens GN=CYP26A1 PE=2 SV=1 - [Q5VXH9_HUMAN]                                                      |
| Q8IUI8 | Cytokine receptor-like factor 3 OS=Homo sapiens GN=CRLF3 PE=1 SV=2 - [CRLF3_HUMAN]                                                                                |
| Q14008 | Cytoskeleton-associated protein 5 OS=Homo sapiens GN=CKAP5 PE=1 SV=3 - [CKAP5_HUMAN]                                                                              |
| P28838 | Cytosol aminopeptidase OS=Homo sapiens GN=LAP3 PE=1 SV=3 - [AMPL_HUMAN]                                                                                           |
| Q10586 | D site-binding protein OS=Homo sapiens GN=DBP PE=2 SV=1 - [DBP_HUMAN]                                                                                             |
| Q58WW2 | DDB1- and CUL4-associated factor 6 OS=Homo sapiens GN=DCAF6 PE=1 SV=1 - [DCAF6_HUMAN]                                                                             |
| Q96HY6 | DDRKG domain-containing protein 1 OS=Homo sapiens GN=DDRKG1 PE=1 SV=2 - [DDRKG_HUMAN]                                                                             |
| D6RJA6 | DEAD (Asp-Glu-Ala-Asp) box polypeptide 46, isoform CRA_b OS=Homo sapiens GN=DDX46 PE=4 SV=1 - [D6RJA6_HUMAN]                                                      |
| Q14UF5 | Decay-accelerating factor splicing variant 2 OS=Homo sapiens GN=DAF PE=2 SV=1 - [Q14UF5_HUMAN]                                                                    |
| Q8IZD9 | Dedicator of cytokinesis protein 3 OS=Homo sapiens GN=DOCK3 PE=1 SV=1 - [DOCK3_HUMAN]                                                                             |
| Q9Y238 | Deleted in lung and esophageal cancer protein 1 OS=Homo sapiens GN=DLEC1 PE=2 SV=2 - [DLEC1_HUMAN]                                                                |
| Q13011 | Delta(3,5)-Delta(2,4)-dienoyl-CoA isomerase, mitochondrial OS=Homo sapiens GN=ECH1 PE=1 SV=2 - [ECH1_HUMAN]                                                       |
| P54886 | Delta-1-pyrroline-5-carboxylate synthase OS=Homo sapiens GN=ALDH18A1 PE=1 SV=2 - [P5CS_HUMAN]                                                                     |
| B7Z3I9 | Delta-aminolevulinic acid dehydratase OS=Homo sapiens PE=2 SV=1 - [B7Z3I9_HUMAN]                                                                                  |
| Q08495 | Dematin OS=Homo sapiens GN=EPB49 PE=1 SV=3 - [DEMA_HUMAN]                                                                                                         |
| O43583 | Density-regulated protein OS=Homo sapiens GN=DENR PE=1 SV=2 - [DENR_HUMAN]                                                                                        |
| Q5QJE6 | Deoxynucleotidyltransferase terminal-interacting protein 2 OS=Homo sapiens GN=DNTTIP2 PE=1 SV=2 - [TDIF2_HUMAN]                                                   |
| P15924 | Desmoplakin OS=Homo sapiens GN=DSP PE=1 SV=3 - [DESP_HUMAN]                                                                                                       |
| Q96JH7 | Deubiquitinating protein VCIP135 OS=Homo sapiens GN=VCPIP1 PE=1 SV=2 - [VCIP1_HUMAN]                                                                              |
| F5H4I0 | Dihydrolipoyl dehydrogenase OS=Homo sapiens GN=DLD PE=3 SV=1 - [F5H4I0_HUMAN]                                                                                     |
| P36957 | Dihydrolipoyllysine-residue succinyltransferase component of 2-oxoglutarate dehydrogenase complex, mitochondrial OS=Homo sapiens GN=DLST PE=1 SV=4 - [ODO2_HUMAN] |
| P53602 | Diphosphomevalonate decarboxylase OS=Homo sapiens GN=MVD PE=1 SV=1 - [MVD1_HUMAN]                                                                                 |
| Q9P265 | Disco-interacting protein 2 homolog B OS=Homo sapiens GN=DIP2B PE=1 SV=3 - [DIP2B_HUMAN]                                                                          |
| Q9Y4D1 | Disheveled-associated activator of morphogenesis 1 OS=Homo sapiens GN=DAAM1 PE=1 SV=2 - [DAAM1_HUMAN]                                                             |
| Q16531 | DNA damage-binding protein 1 OS=Homo sapiens GN=DDB1 PE=1 SV=1 - [DDB1_HUMAN]                                                                                     |
| P04053 | DNA nucleotidyltransferase OS=Homo sapiens GN=DNTT PE=1 SV=3 - [TDT_HUMAN]                                                                                        |
| Q92878 | DNA repair protein RAD50 OS=Homo sapiens GN=RAD50 PE=1 SV=1 - [RAD50_HUMAN]                                                                                       |
| P16989 | DNA-binding protein A OS=Homo sapiens GN=CSDA PE=1 SV=4 - [DBPA_HUMAN]                                                                                            |
| F5H643 | DNA-directed RNA polymerase OS=Homo sapiens GN=POLR1B PE=3 SV=1 - [F5H643_HUMAN]                                                                                  |
| D3DQ66 | DnaJ (Hsp40) homolog, subfamily C, member 6, isoform CRA_c OS=Homo sapiens GN=DNAJC6 PE=4 SV=1 - [D3DQ66_HUMAN]                                                   |
| P25685 | DnaJ homolog subfamily B member 1 OS=Homo sapiens GN=DNAJB1 PE=1 SV=4 - [DNJB1_HUMAN]                                                                             |
| Q9UBS4 | DnaJ homolog subfamily B member 11 OS=Homo sapiens GN=DNAJB11 PE=1 SV=1 - [DJB11_HUMAN]                                                                           |
| Q9UDY4 | DnaJ homolog subfamily B member 4 OS=Homo sapiens GN=DNAJB4 PE=1 SV=1 - [DNJB4_HUMAN]                                                                             |

|        |                                                                                                                           |
|--------|---------------------------------------------------------------------------------------------------------------------------|
| Q96KC8 | DnaJ homolog subfamily C member 1 OS=Homo sapiens GN=DNAJC1 PE=1 SV=1 - [DNJC1_HUMAN]                                     |
| Q9NVH1 | DnaJ homolog subfamily C member 11 OS=Homo sapiens GN=DNAJC11 PE=1 SV=2 - [DJC11_HUMAN]                                   |
| O75165 | DnaJ homolog subfamily C member 13 OS=Homo sapiens GN=DNAJC13 PE=1 SV=5 - [DJC13_HUMAN]                                   |
| Q9NVM6 | DnaJ homolog subfamily C member 17 OS=Homo sapiens GN=DNAJC17 PE=1 SV=1 - [DJC17_HUMAN]                                   |
| Q9H3Z4 | DnaJ homolog subfamily C member 5 OS=Homo sapiens GN=DNAJC5 PE=1 SV=1 - [DNJC5_HUMAN]                                     |
| O75937 | DnaJ homolog subfamily C member 8 OS=Homo sapiens GN=DNAJC8 PE=1 SV=2 - [DNJC8_HUMAN]                                     |
| Q8WXX5 | DnaJ homolog subfamily C member 9 OS=Homo sapiens GN=DNAJC9 PE=1 SV=1 - [DNJC9_HUMAN]                                     |
| O60762 | Dolichol-phosphate mannosyltransferase OS=Homo sapiens GN=DPM1 PE=1 SV=1 - [DPM1_HUMAN]                                   |
| Q9P2X0 | Dolichol-phosphate mannosyltransferase subunit 3 OS=Homo sapiens GN=DPM3 PE=1 SV=2 - [DPM3_HUMAN]                         |
| P04843 | Dolichyl-diphosphooligosaccharide--protein glycosyltransferase subunit 1 OS=Homo sapiens GN=RPN1 PE=1 SV=1 - [RPN1_HUMAN] |
| P49959 | Double-strand break repair protein MRE11A OS=Homo sapiens GN=MRE11A PE=1 SV=3 - [MRE11_HUMAN]                             |
| P46734 | Dual specificity mitogen-activated protein kinase kinase 3 OS=Homo sapiens GN=MAP2K3 PE=1 SV=2 - [MP2K3_HUMAN]            |
| P49761 | Dual specificity protein kinase CLK3 OS=Homo sapiens GN=CLK3 PE=1 SV=3 - [CLK3_HUMAN]                                     |
| Q9NR20 | Dual specificity tyrosine-phosphorylation-regulated kinase 4 OS=Homo sapiens GN=DYRK4 PE=1 SV=2 - [DYRK4_HUMAN]           |
| Q5T1I6 | Dynactin 3 (P22) (Fragment) OS=Homo sapiens GN=DCTN3 PE=2 SV=1 - [Q5T1I6_HUMAN]                                           |
| Q13561 | Dynactin subunit 2 OS=Homo sapiens GN=DCTN2 PE=1 SV=4 - [DCTN2_HUMAN]                                                     |
| P50570 | Dynamin-2 OS=Homo sapiens GN=DNM2 PE=1 SV=2 - [DYN2_HUMAN]                                                                |
| O60313 | Dynamin-like 120 kDa protein, mitochondrial OS=Homo sapiens GN=OPA1 PE=1 SV=3 - [OPA1_HUMAN]                              |
| Q8IVF4 | Dynein heavy chain 10, axonemal OS=Homo sapiens GN=DNAH10 PE=1 SV=4 - [DYH10_HUMAN]                                       |
| Q8TD57 | Dynein heavy chain 3, axonemal OS=Homo sapiens GN=DNAH3 PE=2 SV=1 - [DYH3_HUMAN]                                          |
| P63167 | Dynein light chain 1, cytoplasmic OS=Homo sapiens GN=DYNLL1 PE=1 SV=1 - [DYL1_HUMAN]                                      |
| Q96FJ2 | Dynein light chain 2, cytoplasmic OS=Homo sapiens GN=DYNLL2 PE=1 SV=1 - [DYL2_HUMAN]                                      |
| Q14258 | E3 ubiquitin/ISG15 ligase TRIM25 OS=Homo sapiens GN=TRIM25 PE=1 SV=2 - [TRI25_HUMAN]                                      |
| O95376 | E3 ubiquitin-protein ligase ARIH2 OS=Homo sapiens GN=ARIH2 PE=1 SV=1 - [ARI2_HUMAN]                                       |
| Q9UNE7 | E3 ubiquitin-protein ligase CHIP OS=Homo sapiens GN=STUB1 PE=1 SV=2 - [CHIP_HUMAN]                                        |
| Q9ULT8 | E3 ubiquitin-protein ligase HECTD1 OS=Homo sapiens GN=HECTD1 PE=1 SV=3 - [HECD1_HUMAN]                                    |
| O95714 | E3 ubiquitin-protein ligase HERC2 OS=Homo sapiens GN=HERC2 PE=1 SV=2 - [HERC2_HUMAN]                                      |
| P62877 | E3 ubiquitin-protein ligase RBX1 OS=Homo sapiens GN=RBX1 PE=1 SV=1 - [RBX1_HUMAN]                                         |
| Q5XPI4 | E3 ubiquitin-protein ligase RNF123 OS=Homo sapiens GN=RNF123 PE=1 SV=1 - [RN123_HUMAN]                                    |
| Q8IWW8 | E3 ubiquitin-protein ligase UBR2 OS=Homo sapiens GN=UBR2 PE=1 SV=1 - [UBR2_HUMAN]                                         |
| Q5T4S7 | E3 ubiquitin-protein ligase UBR4 OS=Homo sapiens GN=UBR4 PE=1 SV=1 - [UBR4_HUMAN]                                         |
| Q96JP5 | E3 ubiquitin-protein ligase ZFP91 OS=Homo sapiens GN=ZFP91 PE=1 SV=1 - [ZFP91_HUMAN]                                      |
| Q15075 | Early endosome antigen 1 OS=Homo sapiens GN=EEA1 PE=1 SV=2 - [EEA1_HUMAN]                                                 |
| Q93070 | Ecto-ADP-ribosyltransferase 4 OS=Homo sapiens GN=ART4 PE=2 SV=2 - [NAR4_HUMAN]                                            |
| Q4VBZ6 | EEF1D protein OS=Homo sapiens GN=EEF1D PE=1 SV=1 - [Q4VBZ6_HUMAN]                                                         |
| Q8N3D4 | EH domain-binding protein 1-like protein 1 OS=Homo sapiens GN=EHBP1L1 PE=1 SV=2 - [EH1L1_HUMAN]                           |
| Q9H4M9 | EH domain-containing protein 1 OS=Homo sapiens GN=EHD1 PE=1 SV=2 - [EHD1_HUMAN]                                           |
| P38117 | Electron transfer flavoprotein subunit beta OS=Homo sapiens GN=ETFB PE=1 SV=3 - [ETFB_HUMAN]                              |
| Q2Y0W8 | Electroneutral sodium bicarbonate exchanger 1 OS=Homo sapiens GN=SLC4A8 PE=1 SV=1 - [S4A8_HUMAN]                          |
| P68104 | Elongation factor 1-alpha 1 OS=Homo sapiens GN=EEF1A1 PE=1 SV=1 - [EF1A1_HUMAN]                                           |
| P24534 | Elongation factor 1-beta OS=Homo sapiens GN=EEF1B2 PE=1 SV=3 - [EF1B_HUMAN]                                               |
| P26641 | Elongation factor 1-gamma OS=Homo sapiens GN=EEF1G PE=1 SV=3 - [EF1G_HUMAN]                                               |
| P13639 | Elongation factor 2 OS=Homo sapiens GN=EEF2 PE=1 SV=4 - [EF2_HUMAN]                                                       |

|        |                                                                                                                                     |
|--------|-------------------------------------------------------------------------------------------------------------------------------------|
| P49411 | Elongation factor Tu, mitochondrial OS=Homo sapiens GN=TUFM PE=1 SV=2 - [EFTU_HUMAN]                                                |
| P50402 | Emerin OS=Homo sapiens GN=EMD PE=1 SV=1 - [EMD_HUMAN]                                                                               |
| Q9BXX0 | EMILIN-2 OS=Homo sapiens GN=EMILIN2 PE=1 SV=3 - [EMIL2_HUMAN]                                                                       |
| O94919 | Endonuclease domain-containing 1 protein OS=Homo sapiens GN=ENDOD1 PE=1 SV=2 - [ENDD1_HUMAN]                                        |
| Q9NR46 | Endophilin-B2 OS=Homo sapiens GN=SH3GLB2 PE=1 SV=1 - [SHLB2_HUMAN]                                                                  |
| Q9NZ08 | Endoplasmic reticulum aminopeptidase 1 OS=Homo sapiens GN=ERAP1 PE=1 SV=3 - [ERAP1_HUMAN]                                           |
| P30040 | Endoplasmic reticulum resident protein 29 OS=Homo sapiens GN=ERP29 PE=1 SV=4 - [ERP29_HUMAN]                                        |
| Q9BS26 | Endoplasmic reticulum resident protein 44 OS=Homo sapiens GN=ERP44 PE=1 SV=1 - [ERP44_HUMAN]                                        |
| Q96RQ1 | Endoplasmic reticulum-Golgi intermediate compartment protein 2 OS=Homo sapiens GN=ERGIC2 PE=1 SV=2 - [ERGI2_HUMAN]                  |
| Q9Y282 | Endoplasmic reticulum-Golgi intermediate compartment protein 3 OS=Homo sapiens GN=ERGIC3 PE=1 SV=1 - [ERGI3_HUMAN]                  |
| P14625 | Endoplasmic OS=Homo sapiens GN=HSP90B1 PE=1 SV=1 - [ENPL_HUMAN]                                                                     |
| O60869 | Endothelial differentiation-related factor 1 OS=Homo sapiens GN=EDF1 PE=1 SV=1 - [EDF1_HUMAN]                                       |
| F5H0C8 | Enolase OS=Homo sapiens GN=ENO2 PE=3 SV=1 - [F5H0C8_HUMAN]                                                                          |
| Q5W0J6 | Enoyl Coenzyme A hydratase domain containing 3 (Fragment) OS=Homo sapiens GN=ECHDC3 PE=2 SV=1 - [Q5W0J6_HUMAN]                      |
| P42126 | Enoyl-CoA delta isomerase 1, mitochondrial OS=Homo sapiens GN=ECI1 PE=1 SV=1 - [ECI1_HUMAN]                                         |
| Q4KKX0 | EPB42 protein OS=Homo sapiens GN=EPB42 PE=2 SV=1 - [Q4KKX0_HUMAN]                                                                   |
| B1AUU8 | Epidermal growth factor receptor pathway substrate 15 OS=Homo sapiens GN=EPS15 PE=4 SV=1 - [B1AUU8_HUMAN]                           |
| Q9NRG7 | Epimerase family protein SDR39U1 OS=Homo sapiens GN=SDR39U1 PE=2 SV=2 - [D39U1_HUMAN]                                               |
| P07099 | Epoxide hydrolase 1 OS=Homo sapiens GN=EPHX1 PE=1 SV=1 - [HYEP_HUMAN]                                                               |
| A2RRF3 | EPS15L1 protein OS=Homo sapiens GN=EPS15L1 PE=2 SV=1 - [A2RRF3_HUMAN]                                                               |
| Q9Y6I3 | Epsin-1 OS=Homo sapiens GN=EPN1 PE=1 SV=2 - [EPN1_HUMAN]                                                                            |
| Q99808 | Equilibrative nucleoside transporter 1 OS=Homo sapiens GN=SLC29A1 PE=1 SV=3 - [S29A1_HUMAN]                                         |
| O75477 | Erlin-1 OS=Homo sapiens GN=ERLIN1 PE=1 SV=1 - [ERLN1_HUMAN]                                                                         |
| Q96PL5 | Erythroid membrane-associated protein OS=Homo sapiens GN=ERMAP PE=1 SV=1 - [ERMAP_HUMAN]                                            |
| P30042 | ES1 protein homolog, mitochondrial OS=Homo sapiens GN=C21orf33 PE=1 SV=3 - [ES1_HUMAN]                                              |
| Q6ZVH7 | Espin-like protein OS=Homo sapiens GN=ESPNL PE=1 SV=3 - [ESPNL_HUMAN]                                                               |
| Q53GQ0 | Estradiol 17-beta-dehydrogenase 12 OS=Homo sapiens GN=HSD17B12 PE=1 SV=2 - [DHB12_HUMAN]                                            |
| P60842 | Eukaryotic initiation factor 4A-I OS=Homo sapiens GN=EIF4A1 PE=1 SV=1 - [IF4A1_HUMAN]                                               |
| P38919 | Eukaryotic initiation factor 4A-III OS=Homo sapiens GN=EIF4A3 PE=1 SV=4 - [IF4A3_HUMAN]                                             |
| P62495 | Eukaryotic peptide chain release factor subunit 1 OS=Homo sapiens GN=ETF1 PE=1 SV=3 - [ERF1_HUMAN]                                  |
| P05198 | Eukaryotic translation initiation factor 2 subunit 1 OS=Homo sapiens GN=EIF2S1 PE=1 SV=3 - [IF2A_HUMAN]                             |
| P20042 | Eukaryotic translation initiation factor 2 subunit 2 OS=Homo sapiens GN=EIF2S2 PE=1 SV=2 - [IF2B_HUMAN]                             |
| P41091 | Eukaryotic translation initiation factor 2 subunit 3 OS=Homo sapiens GN=EIF2S3 PE=1 SV=3 - [IF2G_HUMAN]                             |
| Q5QP88 | Eukaryotic translation initiation factor 2B, subunit 3 gamma, 58kDa (Fragment) OS=Homo sapiens GN=EIF2B3 PE=2 SV=1 - [Q5QP88_HUMAN] |
| B1ALI0 | Eukaryotic translation initiation factor 2C, 3 OS=Homo sapiens GN=EIF2C3 PE=4 SV=1 - [B1ALI0_HUMAN]                                 |
| Q14152 | Eukaryotic translation initiation factor 3 subunit A OS=Homo sapiens GN=EIF3A PE=1 SV=1 - [EIF3A_HUMAN]                             |
| P60228 | Eukaryotic translation initiation factor 3 subunit E OS=Homo sapiens GN=EIF3E PE=1 SV=1 - [EIF3E_HUMAN]                             |
| O75821 | Eukaryotic translation initiation factor 3 subunit G OS=Homo sapiens GN=EIF3G PE=1 SV=2 - [EIF3G_HUMAN]                             |
| O15372 | Eukaryotic translation initiation factor 3 subunit H OS=Homo sapiens GN=EIF3H PE=1 SV=1 - [EIF3H_HUMAN]                             |
| Q13347 | Eukaryotic translation initiation factor 3 subunit I OS=Homo sapiens GN=EIF3I PE=1 SV=1 - [EIF3I_HUMAN]                             |
| O75822 | Eukaryotic translation initiation factor 3 subunit J OS=Homo sapiens GN=EIF3J PE=1 SV=2 - [EIF3J_HUMAN]                             |
| Q9Y262 | Eukaryotic translation initiation factor 3 subunit L OS=Homo sapiens GN=EIF3L PE=1 SV=1 - [EIF3L_HUMAN]                             |
| P06730 | Eukaryotic translation initiation factor 4E OS=Homo sapiens GN=EIF4E PE=1 SV=2 - [IF4E_HUMAN]                                       |

|        |                                                                                                                                  |
|--------|----------------------------------------------------------------------------------------------------------------------------------|
| P55010 | Eukaryotic translation initiation factor 5 OS=Homo sapiens GN=EIF5 PE=1 SV=2 - [IF5_HUMAN]                                       |
| P63241 | Eukaryotic translation initiation factor 5A-1 OS=Homo sapiens GN=EIF5A PE=1 SV=2 - [IF5A1_HUMAN]                                 |
| O60841 | Eukaryotic translation initiation factor 5B OS=Homo sapiens GN=EIF5B PE=1 SV=4 - [IF2P_HUMAN]                                    |
| C9JGE3 | Ewing sarcoma breakpoint region 1, isoform CRA_e OS=Homo sapiens GN=EWSR1 PE=4 SV=1 - [C9JGE3_HUMAN]                             |
| O00471 | Exocyst complex component 5 OS=Homo sapiens GN=EXOC5 PE=1 SV=1 - [EXOC5_HUMAN]                                                   |
| Q9BSJ8 | Extended synaptotagmin-1 OS=Homo sapiens GN=ESYT1 PE=1 SV=1 - [ESYT1_HUMAN]                                                      |
| A0FGR8 | Extended synaptotagmin-2 OS=Homo sapiens GN=ESYT2 PE=1 SV=1 - [ESYT2_HUMAN]                                                      |
| P15311 | Ezrin OS=Homo sapiens GN=EZR PE=1 SV=4 - [EZRI_HUMAN]                                                                            |
| P52907 | F-actin-capping protein subunit alpha-1 OS=Homo sapiens GN=CAPZA1 PE=1 SV=3 - [CAZA1_HUMAN]                                      |
| B1AJQ5 | Family with sequence similarity 76, member A (Fragment) OS=Homo sapiens GN=FAM76A PE=4 SV=1 - [B1AJQ5_HUMAN]                     |
| Q92945 | Far upstream element-binding protein 2 OS=Homo sapiens GN=KHSRP PE=1 SV=4 - [FUBP2_HUMAN]                                        |
| P49327 | Fatty acid synthase OS=Homo sapiens GN=FASN PE=1 SV=3 - [FAS_HUMAN]                                                              |
| Q6PIJ6 | F-box only protein 38 OS=Homo sapiens GN=FBXO38 PE=1 SV=3 - [FBX38_HUMAN]                                                        |
| Q5TI86 | F-box protein 7 OS=Homo sapiens GN=FBXO7 PE=2 SV=1 - [Q5TI86_HUMAN]                                                              |
| Q96IG2 | F-box/LRR-repeat protein 20 OS=Homo sapiens GN=FBXL20 PE=1 SV=2 - [FXL20_HUMAN]                                                  |
| Q5JV73 | FERM and PDZ domain-containing protein 3 OS=Homo sapiens GN=FRMPD3 PE=2 SV=2 - [FRPD3_HUMAN]                                     |
| Q86UX7 | Fermitin family homolog 3 OS=Homo sapiens GN=FERMT3 PE=1 SV=1 - [URP2_HUMAN]                                                     |
| P02794 | Ferritin heavy chain OS=Homo sapiens GN=FTH1 PE=1 SV=2 - [FRIH_HUMAN]                                                            |
| Q9BXU8 | Ferritin heavy polypeptide-like 17 OS=Homo sapiens GN=FTHL17 PE=2 SV=1 - [FHL17_HUMAN]                                           |
| P02792 | Ferritin light chain OS=Homo sapiens GN=FTL PE=1 SV=2 - [FRIL_HUMAN]                                                             |
| P22830 | Ferrochelatase, mitochondrial OS=Homo sapiens GN=FECH PE=1 SV=2 - [HEMH_HUMAN]                                                   |
| P55075 | Fibroblast growth factor 8 OS=Homo sapiens GN=FGF8 PE=1 SV=1 - [FGF8_HUMAN]                                                      |
| Q5HY54 | Filamin A, alpha (Actin binding protein 280) OS=Homo sapiens GN=FLNA PE=2 SV=1 - [Q5HY54_HUMAN]                                  |
| Q14315 | Filamin-C OS=Homo sapiens GN=FLNC PE=1 SV=3 - [FLNC_HUMAN]                                                                       |
| Q5T1M5 | FK506-binding protein 15 OS=Homo sapiens GN=FKBP15 PE=1 SV=2 - [FKB15_HUMAN]                                                     |
| P30043 | Flavin reductase OS=Homo sapiens GN=BLVRB PE=1 SV=3 - [BLVRB_HUMAN]                                                              |
| O75955 | Flotillin-1 OS=Homo sapiens GN=FLOT1 PE=1 SV=3 - [FLOT1_HUMAN]                                                                   |
| Q14254 | Flotillin-2 OS=Homo sapiens GN=FLOT2 PE=1 SV=2 - [FLOT2_HUMAN]                                                                   |
| Q9H479 | Fructosamine-3-kinase OS=Homo sapiens GN=FN3K PE=1 SV=1 - [FN3K_HUMAN]                                                           |
| P04075 | Fructose-bisphosphate aldolase A OS=Homo sapiens GN=ALDOA PE=1 SV=2 - [ALDOA_HUMAN]                                              |
| B7Z1N6 | Fructose-bisphosphate aldolase OS=Homo sapiens GN=ALDOC PE=2 SV=1 - [B7Z1N6_HUMAN]                                               |
| Q86TT8 | Full-length cDNA clone CS0DC011YL17 of Neuroblastoma of Homo sapiens (human) OS=Homo sapiens GN=MARK3 PE=2 SV=1 - [Q86TT8_HUMAN] |
| P07954 | Fumarate hydratase, mitochondrial OS=Homo sapiens GN=FH PE=1 SV=3 - [FUMH_HUMAN]                                                 |
| Q9BWH2 | FUN14 domain-containing protein 2 OS=Homo sapiens GN=FUNDC2 PE=1 SV=2 - [FUND2_HUMAN]                                            |
| P48544 | G protein-activated inward rectifier potassium channel 4 OS=Homo sapiens GN=KCNJ5 PE=1 SV=2 - [IRK5_HUMAN]                       |
| P43250 | G protein-coupled receptor kinase 6 OS=Homo sapiens GN=GRK6 PE=1 SV=2 - [GRK6_HUMAN]                                             |
| Q8WWL7 | G2/mitotic-specific cyclin-B3 OS=Homo sapiens GN=CCNB3 PE=1 SV=2 - [CCNB3_HUMAN]                                                 |
| P17931 | Galectin-3 OS=Homo sapiens GN=LGALS3 PE=1 SV=5 - [LEG3_HUMAN]                                                                    |
| Q9UEY8 | Gamma-adducin OS=Homo sapiens GN=ADD3 PE=1 SV=1 - [ADDG_HUMAN]                                                                   |
| O95166 | Gamma-aminobutyric acid receptor-associated protein OS=Homo sapiens GN=GABARAP PE=1 SV=1 - [GBRAP_HUMAN]                         |
| P60520 | Gamma-aminobutyric acid receptor-associated protein-like 2 OS=Homo sapiens GN=GABARAPL2 PE=1 SV=1 - [GBRL2_HUMAN]                |
| Q92820 | Gamma-glutamyl hydrolase OS=Homo sapiens GN=GGH PE=1 SV=2 - [GGH_HUMAN]                                                          |
| Q99747 | Gamma-soluble NSF attachment protein OS=Homo sapiens GN=NAPG PE=1 SV=1 - [SNAG_HUMAN]                                            |

|        |                                                                                                                             |
|--------|-----------------------------------------------------------------------------------------------------------------------------|
| Q92696 | Geranylgeranyl transferase type-2 subunit alpha OS=Homo sapiens GN=RABGGTA PE=1 SV=2 - [PGTA_HUMAN]                         |
| C9IYJ3 | Glioblastoma amplified sequence, isoform CRA_a OS=Homo sapiens GN=GBAS PE=4 SV=1 - [C9IYJ3_HUMAN]                           |
| Q6UWM5 | GLIPR1-like protein 1 OS=Homo sapiens GN=GLIPR1L1 PE=1 SV=2 - [GPRL1_HUMAN]                                                 |
| E9PDV8 | Glucose-6-phosphate 1-dehydrogenase OS=Homo sapiens GN=G6PD PE=3 SV=1 - [E9PDV8_HUMAN]                                      |
| O43826 | Glucose-6-phosphate translocase OS=Homo sapiens GN=SLC37A4 PE=1 SV=1 - [G6PT1_HUMAN]                                        |
| P15104 | Glutamine synthetase OS=Homo sapiens GN=GLUL PE=1 SV=4 - [GLNA_HUMAN]                                                       |
| Q86SX6 | Glutaredoxin-related protein 5, mitochondrial OS=Homo sapiens GN=GLRX5 PE=1 SV=2 - [GLRX5_HUMAN]                            |
| Q92947 | Glutaryl-CoA dehydrogenase, mitochondrial OS=Homo sapiens GN=GCDH PE=1 SV=1 - [GCDH_HUMAN]                                  |
| C8KIM0 | Glutathion reductase delta8+9 alternative splicing variant OS=Homo sapiens GN=GSR PE=2 SV=1 - [C8KIM0_HUMAN]                |
| P07203 | Glutathione peroxidase 1 OS=Homo sapiens GN=GPX1 PE=1 SV=4 - [GPX1_HUMAN]                                                   |
| P78417 | Glutathione S-transferase omega-1 OS=Homo sapiens GN=GSTO1 PE=1 SV=2 - [GSTO1_HUMAN]                                        |
| P04406 | Glyceraldehyde-3-phosphate dehydrogenase OS=Homo sapiens GN=GAPDH PE=1 SV=3 - [G3P_HUMAN]                                   |
| Q9NZC3 | Glycerophosphodiester phosphodiesterase 1 OS=Homo sapiens GN=GDE1 PE=1 SV=1 - [GDE1_HUMAN]                                  |
| B8Q185 | Glycophorin A MNS blood group OS=Homo sapiens GN=GYP A PE=4 SV=1 - [B8Q185_HUMAN]                                           |
| P04921 | Glycophorin-C OS=Homo sapiens GN=GYP C PE=1 SV=1 - [GLPC_HUMAN]                                                             |
| P41250 | Glycyl-tRNA synthetase OS=Homo sapiens GN=GARS PE=1 SV=3 - [SYG_HUMAN]                                                      |
| P36959 | GMP reductase 1 OS=Homo sapiens GN=GMPR PE=1 SV=1 - [GMPR1_HUMAN]                                                           |
| Q5T5I6 | Golgi phosphoprotein 3-like (Fragment) OS=Homo sapiens GN=GOLPH3L PE=2 SV=1 - [Q5T5I6_HUMAN]                                |
| Q9H4G4 | Golgi-associated plant pathogenesis-related protein 1 OS=Homo sapiens GN=GLIPR2 PE=1 SV=3 - [GAPR1_HUMAN]                   |
| Q7Z5G4 | Golgin subfamily A member 7 OS=Homo sapiens GN=GOLGA7 PE=1 SV=2 - [GOGA7_HUMAN]                                             |
| Q92538 | Golgi-specific brefeldin A-resistance guanine nucleotide exchange factor 1 OS=Homo sapiens GN=GBF1 PE=1 SV=2 - [GBF1_HUMAN] |
| B3KUR5 | GRAM domain containing 1C, isoform CRA_d OS=Homo sapiens GN=GRAMD1C PE=2 SV=1 - [B3KUR5_HUMAN]                              |
| P28799 | Granulins OS=Homo sapiens GN=GRN PE=1 SV=2 - [GRN_HUMAN]                                                                    |
| Q8IWI2 | GRIP and coiled-coil domain-containing protein 2 OS=Homo sapiens GN=GCC2 PE=1 SV=4 - [GCC2_HUMAN]                           |
| B1B0M1 | GRIP1 associated protein 1 OS=Homo sapiens GN=GRIPAP1 PE=4 SV=1 - [B1B0M1_HUMAN]                                            |
| B4DWV5 | GrpE protein homolog OS=Homo sapiens GN=GRPEL1 PE=2 SV=1 - [B4DWV5_HUMAN]                                                   |
| P01112 | GTPase HRas OS=Homo sapiens GN=HRAS PE=1 SV=1 - [RASH_HUMAN]                                                                |
| P01116 | GTPase KRas OS=Homo sapiens GN=KRAS PE=1 SV=1 - [RASK_HUMAN]                                                                |
| P01111 | GTPase NRas OS=Homo sapiens GN=NRAS PE=1 SV=1 - [RASN_HUMAN]                                                                |
| Q14C86 | GTPase-activating protein and VPS9 domain-containing protein 1 OS=Homo sapiens GN=GAPVD1 PE=1 SV=2 - [GAPD1_HUMAN]          |
| P62826 | GTP-binding nuclear protein Ran OS=Homo sapiens GN=RAN PE=1 SV=3 - [RAN_HUMAN]                                              |
| O00178 | GTP-binding protein 1 OS=Homo sapiens GN=GTPBP1 PE=1 SV=3 - [GTPB1_HUMAN]                                                   |
| Q9BX10 | GTP-binding protein 2 OS=Homo sapiens GN=GTPBP2 PE=2 SV=1 - [GTPB2_HUMAN]                                                   |
| O75628 | GTP-binding protein REM 1 OS=Homo sapiens GN=REM1 PE=1 SV=2 - [REM1_HUMAN]                                                  |
| P04899 | Guanine nucleotide-binding protein G(i) subunit alpha-2 OS=Homo sapiens GN=GNAI2 PE=1 SV=3 - [GNAI2_HUMAN]                  |
| Q9P2W3 | Guanine nucleotide-binding protein G(I)/G(S)/G(O) subunit gamma-13 OS=Homo sapiens GN=GNG13 PE=2 SV=1 - [GBG13_HUMAN]       |
| P59768 | Guanine nucleotide-binding protein G(I)/G(S)/G(O) subunit gamma-2 OS=Homo sapiens GN=GNG2 PE=1 SV=2 - [GBG2_HUMAN]          |
| P63218 | Guanine nucleotide-binding protein G(I)/G(S)/G(O) subunit gamma-5 OS=Homo sapiens GN=GNG5 PE=1 SV=3 - [GBG5_HUMAN]          |
| Q9UK08 | Guanine nucleotide-binding protein G(I)/G(S)/G(O) subunit gamma-8 OS=Homo sapiens GN=GNG8 PE=2 SV=1 - [GBG8_HUMAN]          |
| P62873 | Guanine nucleotide-binding protein G(I)/G(S)/G(T) subunit beta-1 OS=Homo sapiens GN=GNB1 PE=1 SV=3 - [GBB1_HUMAN]           |
| P62879 | Guanine nucleotide-binding protein G(I)/G(S)/G(T) subunit beta-2 OS=Homo sapiens GN=GNB2 PE=1 SV=3 - [GBB2_HUMAN]           |
| P08754 | Guanine nucleotide-binding protein G(k) subunit alpha OS=Homo sapiens GN=GNAI3 PE=1 SV=3 - [GNAI3_HUMAN]                    |
| P50148 | Guanine nucleotide-binding protein G(q) subunit alpha OS=Homo sapiens GN=GNAQ PE=1 SV=4 - [GNAQ_HUMAN]                      |

|        |                                                                                                                        |
|--------|------------------------------------------------------------------------------------------------------------------------|
| P63092 | Guanine nucleotide-binding protein G(s) subunit alpha isoforms short OS=Homo sapiens GN=GNAS PE=1 SV=1 - [GNAS2_HUMAN] |
| P29992 | Guanine nucleotide-binding protein subunit alpha-11 OS=Homo sapiens GN=GNA11 PE=1 SV=2 - [GNA11_HUMAN]                 |
| Q14344 | Guanine nucleotide-binding protein subunit alpha-13 OS=Homo sapiens GN=GNA13 PE=1 SV=2 - [GNA13_HUMAN]                 |
| P63244 | Guanine nucleotide-binding protein subunit beta-2-like 1 OS=Homo sapiens GN=GNB2L1 PE=1 SV=3 - [GBLP_HUMAN]            |
| B3KSY4 | HCG1787779, isoform CRA_b OS=Homo sapiens GN=CORO7 PE=2 SV=1 - [B3KSY4_HUMAN]                                          |
| B2RDM2 | HCG1811539, isoform CRA_b OS=Homo sapiens GN=TXNDC5 PE=2 SV=1 - [B2RDM2_HUMAN]                                         |
| D3DTT2 | HCG1820468, isoform CRA_a OS=Homo sapiens GN=FAM18B2 PE=4 SV=1 - [D3DTT2_HUMAN]                                        |
| Q6PIK3 | HCG1995540, isoform CRA_b (Hcg2044074, isoform cra_d) OS=Homo sapiens GN=RAB4B PE=2 SV=1 - [Q6PIK3_HUMAN]              |
| B4DP52 | HCG2005638, isoform CRA_c OS=Homo sapiens GN=DDX39B PE=2 SV=1 - [B4DP52_HUMAN]                                         |
| A6PVK0 | HCG2019817, isoform CRA_b OS=Homo sapiens GN=RBCK1 PE=4 SV=1 - [A6PVK0_HUMAN]                                          |
| B4DHA4 | HCG2031650, isoform CRA_f OS=Homo sapiens GN=NSUN4 PE=2 SV=1 - [B4DHA4_HUMAN]                                          |
| A2A3U5 | HCG20471, isoform CRA_d OS=Homo sapiens GN=OPRS1 PE=2 SV=1 - [A2A3U5_HUMAN]                                            |
| Q4VXL4 | HCG41426, isoform CRA_c OS=Homo sapiens GN=TACC2 PE=2 SV=1 - [Q4VXL4_HUMAN]                                            |
| Q5T3Q7 | HEAT repeat containing 1 OS=Homo sapiens GN=HEATR1 PE=2 SV=1 - [Q5T3Q7_HUMAN]                                          |
| B8ZZL8 | Heat shock 10kDa protein 1 (Chaperonin 10), isoform CRA_b OS=Homo sapiens GN=HSPE1 PE=3 SV=1 - [B8ZZL8_HUMAN]          |
| P08107 | Heat shock 70 kDa protein 1A/1B OS=Homo sapiens GN=HSPA1A PE=1 SV=5 - [HSP71_HUMAN]                                    |
| P34931 | Heat shock 70 kDa protein 1-like OS=Homo sapiens GN=HSPA1L PE=1 SV=2 - [HS71L_HUMAN]                                   |
| P34932 | Heat shock 70 kDa protein 4 OS=Homo sapiens GN=HSPA4 PE=1 SV=4 - [HSP74_HUMAN]                                         |
| P11142 | Heat shock cognate 71 kDa protein OS=Homo sapiens GN=HSPA8 PE=1 SV=1 - [HSP7C_HUMAN]                                   |
| P04792 | Heat shock protein beta-1 OS=Homo sapiens GN=HSPB1 PE=1 SV=2 - [HSPB1_HUMAN]                                           |
| P07900 | Heat shock protein HSP 90-alpha OS=Homo sapiens GN=HSP90AA1 PE=1 SV=5 - [HS90A_HUMAN]                                  |
| P08238 | Heat shock protein HSP 90-beta OS=Homo sapiens GN=HSP90AB1 PE=1 SV=4 - [HS90B_HUMAN]                                   |
| Q14527 | Helicase-like transcription factor OS=Homo sapiens GN=HLTF PE=1 SV=2 - [HLTF_HUMAN]                                    |
| P09601 | Heme oxygenase 1 OS=Homo sapiens GN=HMOX1 PE=1 SV=1 - [HMOX1_HUMAN]                                                    |
| Q9NRV9 | Heme-binding protein 1 OS=Homo sapiens GN=HEBP1 PE=1 SV=1 - [HEBP1_HUMAN]                                              |
| Q9Y5Z4 | Heme-binding protein 2 OS=Homo sapiens GN=HEBP2 PE=1 SV=1 - [HEBP2_HUMAN]                                              |
| Q9BXL5 | Hemogen OS=Homo sapiens GN=HEMGN PE=1 SV=1 - [HEMGN_HUMAN]                                                             |
| P69905 | Hemoglobin subunit alpha OS=Homo sapiens GN=HBA1 PE=1 SV=2 - [HBA_HUMAN]                                               |
| P68871 | Hemoglobin subunit beta OS=Homo sapiens GN=HBB PE=1 SV=2 - [HBB_HUMAN]                                                 |
| P02042 | Hemoglobin subunit delta OS=Homo sapiens GN=HBD PE=1 SV=2 - [HBD_HUMAN]                                                |
| P02100 | Hemoglobin subunit epsilon OS=Homo sapiens GN=HBE1 PE=1 SV=2 - [HBE_HUMAN]                                             |
| P69891 | Hemoglobin subunit gamma-1 OS=Homo sapiens GN=HBG1 PE=1 SV=2 - [HBG1_HUMAN]                                            |
| P69892 | Hemoglobin subunit gamma-2 OS=Homo sapiens GN=HBG2 PE=1 SV=2 - [HBG2_HUMAN]                                            |
| Q6B0K9 | Hemoglobin subunit mu OS=Homo sapiens GN=HBM PE=2 SV=1 - [HBM_HUMAN]                                                   |
| P02008 | Hemoglobin subunit zeta OS=Homo sapiens GN=HBZ PE=1 SV=2 - [HBAZ_HUMAN]                                                |
| D9YZU8 | Hemoglobin, gamma A OS=Homo sapiens GN=HBG1 PE=3 SV=1 - [D9YZU8_HUMAN]                                                 |
| P51858 | Hepatoma-derived growth factor OS=Homo sapiens GN=HDGF PE=1 SV=1 - [HDGF_HUMAN]                                        |
| P09651 | Heterogeneous nuclear ribonucleoprotein A1 OS=Homo sapiens GN=HNRNPA1 PE=1 SV=5 - [ROA1_HUMAN]                         |
| P31942 | Heterogeneous nuclear ribonucleoprotein H3 OS=Homo sapiens GN=HNRNPH3 PE=1 SV=2 - [HNRH3_HUMAN]                        |
| Q5T6W5 | Heterogeneous nuclear ribonucleoprotein K OS=Homo sapiens GN=HNRNPK PE=2 SV=1 - [Q5T6W5_HUMAN]                         |
| P14866 | Heterogeneous nuclear ribonucleoprotein L OS=Homo sapiens GN=HNRNPL PE=1 SV=2 - [HNRPL_HUMAN]                          |
| P52272 | Heterogeneous nuclear ribonucleoprotein M OS=Homo sapiens GN=HNRNPM PE=1 SV=3 - [HNRPM_HUMAN]                          |
| O60506 | Heterogeneous nuclear ribonucleoprotein Q OS=Homo sapiens GN=SYNCRIP PE=1 SV=2 - [HNRPQ_HUMAN]                         |

|        |                                                                                                                                |
|--------|--------------------------------------------------------------------------------------------------------------------------------|
| Q2L7G6 | Heterogeneous nuclear ribonucleoprotein-R2 OS=Homo sapiens GN=HNRNPR PE=2 SV=1 - [Q2L7G6_HUMAN]                                |
| P22626 | Heterogeneous nuclear ribonucleoproteins A2/B1 OS=Homo sapiens GN=HNRNPA2B1 PE=1 SV=2 - [ROA2_HUMAN]                           |
| P26583 | High mobility group protein B2 OS=Homo sapiens GN=HMGB2 PE=1 SV=2 - [HMGB2_HUMAN]                                              |
| Q5T7C0 | High-mobility group box 1 (Fragment) OS=Homo sapiens GN=HMGB1 PE=2 SV=1 - [Q5T7C0_HUMAN]                                       |
| Q9BX68 | Histidine triad nucleotide-binding protein 2, mitochondrial OS=Homo sapiens GN=HINT2 PE=1 SV=1 - [HINT2_HUMAN]                 |
| P16403 | Histone H1.2 OS=Homo sapiens GN=HIST1H1C PE=1 SV=2 - [H12_HUMAN]                                                               |
| P16402 | Histone H1.3 OS=Homo sapiens GN=HIST1H1D PE=1 SV=2 - [H13_HUMAN]                                                               |
| P10412 | Histone H1.4 OS=Homo sapiens GN=HIST1H1E PE=1 SV=2 - [H14_HUMAN]                                                               |
| P16401 | Histone H1.5 OS=Homo sapiens GN=HIST1H1B PE=1 SV=3 - [H15_HUMAN]                                                               |
| Q96KK5 | Histone H2A type 1-H OS=Homo sapiens GN=HIST1H2AH PE=1 SV=3 - [H2A1H_HUMAN]                                                    |
| P16104 | Histone H2A.x OS=Homo sapiens GN=H2AFX PE=1 SV=2 - [H2AX_HUMAN]                                                                |
| P0C0S5 | Histone H2A.Z OS=Homo sapiens GN=H2AFZ PE=1 SV=2 - [H2AZ_HUMAN]                                                                |
| P58876 | Histone H2B type 1-D OS=Homo sapiens GN=HIST1H2BD PE=1 SV=2 - [H2B1D_HUMAN]                                                    |
| P68431 | Histone H3.1 OS=Homo sapiens GN=HIST1H3A PE=1 SV=2 - [H31_HUMAN]                                                               |
| P62805 | Histone H4 OS=Homo sapiens GN=HIST1H4A PE=1 SV=2 - [H4_HUMAN]                                                                  |
| B0UX83 | HLA-B associated transcript 3 OS=Homo sapiens GN=BAT3 PE=4 SV=1 - [B0UX83_HUMAN]                                               |
| P51610 | Host cell factor 1 OS=Homo sapiens GN=HCFC1 PE=1 SV=2 - [HCFC1_HUMAN]                                                          |
| P50502 | Hsc70-interacting protein OS=Homo sapiens GN=ST13 PE=1 SV=2 - [F10A1_HUMAN]                                                    |
| Q16543 | Hsp90 co-chaperone Cdc37 OS=Homo sapiens GN=CDC37 PE=1 SV=1 - [CDC37_HUMAN]                                                    |
| O75146 | Huntingtin-interacting protein 1-related protein OS=Homo sapiens GN=HIP1R PE=1 SV=2 - [HIP1R_HUMAN]                            |
| Q16836 | Hydroxyacyl-coenzyme A dehydrogenase, mitochondrial OS=Homo sapiens GN=HADH PE=1 SV=3 - [HCDH_HUMAN]                           |
| Q16775 | Hydroxyacylglutathione hydrolase, mitochondrial OS=Homo sapiens GN=HAGH PE=1 SV=2 - [GLO2_HUMAN]                               |
| Q6YN16 | Hydroxysteroid dehydrogenase-like protein 2 OS=Homo sapiens GN=HSDL2 PE=1 SV=1 - [HSDL2_HUMAN]                                 |
| P00492 | Hypoxanthine-guanine phosphoribosyltransferase OS=Homo sapiens GN=HPRT1 PE=1 SV=2 - [HPRT_HUMAN]                               |
| Q9Y4L1 | Hypoxia up-regulated protein 1 OS=Homo sapiens GN=HYOU1 PE=1 SV=1 - [HYOU1_HUMAN]                                              |
| P01880 | Ig delta chain C region OS=Homo sapiens GN=IGHD PE=1 SV=2 - [IGHD_HUMAN]                                                       |
| P01854 | Ig epsilon chain C region OS=Homo sapiens GN=IGHE PE=1 SV=1 - [IGHE_HUMAN]                                                     |
| P01857 | Ig gamma-1 chain C region OS=Homo sapiens GN=IGHG1 PE=1 SV=1 - [IGHG1_HUMAN]                                                   |
| P01773 | Ig heavy chain V-III region BUR OS=Homo sapiens PE=1 SV=1 - [HV312_HUMAN]                                                      |
| P0CG05 | Ig lambda-2 chain C regions OS=Homo sapiens GN=IGLC2 PE=1 SV=1 - [LAC2_HUMAN]                                                  |
| Q9Y5U9 | Immediate early response 3-interacting protein 1 OS=Homo sapiens GN=IER3IP1 PE=1 SV=1 - [IR3IP_HUMAN]                          |
| Q6WRI0 | Immunoglobulin superfamily member 10 OS=Homo sapiens GN=IGSF10 PE=1 SV=1 - [IGS10_HUMAN]                                       |
| P78318 | Immunoglobulin-binding protein 1 OS=Homo sapiens GN=IGBP1 PE=1 SV=1 - [IGBP1_HUMAN]                                            |
| Q14974 | Importin subunit beta-1 OS=Homo sapiens GN=KPNB1 PE=1 SV=2 - [IMB1_HUMAN]                                                      |
| O00410 | Importin-5 OS=Homo sapiens GN=IPO5 PE=1 SV=4 - [IPO5_HUMAN]                                                                    |
| O95373 | Importin-7 OS=Homo sapiens GN=IPO7 PE=1 SV=1 - [IPO7_HUMAN]                                                                    |
| Q96P70 | Importin-9 OS=Homo sapiens GN=IPO9 PE=1 SV=3 - [IPO9_HUMAN]                                                                    |
| Q14164 | Inhibitor of nuclear factor kappa-B kinase subunit epsilon OS=Homo sapiens GN=IKBKE PE=1 SV=1 - [IKKE_HUMAN]                   |
| O43314 | Inositol hexakisphosphate and diphosphoinositol-pentakisphosphate kinase 2 OS=Homo sapiens GN=PPIP5K2 PE=1 SV=3 - [VIP2_HUMAN] |
| Q9Y6M1 | Insulin-like growth factor 2 mRNA-binding protein 2 OS=Homo sapiens GN=IGF2BP2 PE=1 SV=2 - [IF2B2_HUMAN]                       |
| P05556 | Integrin beta-1 OS=Homo sapiens GN=ITGB1 PE=1 SV=2 - [ITB1_HUMAN]                                                              |
| Q14773 | Intercellular adhesion molecule 4 OS=Homo sapiens GN=ICAM4 PE=2 SV=1 - [ICAM4_HUMAN]                                           |
| P80217 | Interferon-induced 35 kDa protein OS=Homo sapiens GN=IFI35 PE=1 SV=5 - [IN35_HUMAN]                                            |



|        |                                                                                                                 |
|--------|-----------------------------------------------------------------------------------------------------------------|
| Q722Y8 | Interferon-induced very large GTPase 1 OS=Homo sapiens GN=GVINP1 PE=2 SV=2 - [GVIN1_HUMAN]                      |
| Q12905 | Interleukin enhancer-binding factor 2 OS=Homo sapiens GN=ILF2 PE=1 SV=2 - [ILF2_HUMAN]                          |
| Q5JU85 | IQ motif and SEC7 domain-containing protein 2 OS=Homo sapiens GN=IQSEC2 PE=1 SV=1 - [IQEC2_HUMAN]               |
| P48735 | Isocitrate dehydrogenase [NADP], mitochondrial OS=Homo sapiens GN=IDH2 PE=1 SV=2 - [IDHP_HUMAN]                 |
| P53990 | IST1 homolog OS=Homo sapiens GN=KIAA0174 PE=1 SV=1 - [IST1_HUMAN]                                               |
| A0T124 | Jumonji domain-containing 1 C splice variant OS=Homo sapiens GN=JMJD1C PE=2 SV=1 - [A0T124_HUMAN]               |
| Q9Y624 | Junctional adhesion molecule A OS=Homo sapiens GN=F11R PE=1 SV=1 - [JAM1_HUMAN]                                 |
| Q5TFJ7 | Karyopherin alpha 6 (Importin alpha 7) (Fragment) OS=Homo sapiens GN=KPNA6 PE=2 SV=1 - [Q5TFJ7_HUMAN]           |
| P23276 | Kell blood group glycoprotein OS=Homo sapiens GN=KEL PE=1 SV=2 - [KELL_HUMAN]                                   |
| P13645 | Keratin, type I cytoskeletal 10 OS=Homo sapiens GN=KRT10 PE=1 SV=6 - [K1C10_HUMAN]                              |
| P08779 | Keratin, type I cytoskeletal 16 OS=Homo sapiens GN=KRT16 PE=1 SV=4 - [K1C16_HUMAN]                              |
| Q04695 | Keratin, type I cytoskeletal 17 OS=Homo sapiens GN=KRT17 PE=1 SV=2 - [K1C17_HUMAN]                              |
| P35527 | Keratin, type I cytoskeletal 9 OS=Homo sapiens GN=KRT9 PE=1 SV=3 - [K1C9_HUMAN]                                 |
| P04264 | Keratin, type II cytoskeletal 1 OS=Homo sapiens GN=KRT1 PE=1 SV=6 - [K2C1_HUMAN]                                |
| P12035 | Keratin, type II cytoskeletal 3 OS=Homo sapiens GN=KRT3 PE=1 SV=3 - [K2C3_HUMAN]                                |
| Q3SY84 | Keratin, type II cytoskeletal 71 OS=Homo sapiens GN=KRT71 PE=1 SV=3 - [K2C71_HUMAN]                             |
| Q8N1N4 | Keratin, type II cytoskeletal 78 OS=Homo sapiens GN=KRT78 PE=1 SV=2 - [K2C78_HUMAN]                             |
| Q17RZ5 | Kinectin 1 (Kinesin receptor) OS=Homo sapiens GN=KTN1 PE=2 SV=1 - [Q17RZ5_HUMAN]                                |
| P33176 | Kinesin-1 heavy chain OS=Homo sapiens GN=KIF5B PE=1 SV=1 - [KINH_HUMAN]                                         |
| Q9P2E2 | Kinesin-like protein KIF17 OS=Homo sapiens GN=KIF17 PE=1 SV=3 - [KIF17_HUMAN]                                   |
| Q9BW19 | Kinesin-like protein KIFC1 OS=Homo sapiens GN=KIFC1 PE=1 SV=2 - [KIFC1_HUMAN]                                   |
| Q9UEF7 | Klotho OS=Homo sapiens GN=KL PE=1 SV=2 - [KLOT_HUMAN]                                                           |
| Q04760 | Lactoylglutathione lyase OS=Homo sapiens GN=GLO1 PE=1 SV=4 - [LGUL_HUMAN]                                       |
| Q03252 | Lamin-B2 OS=Homo sapiens GN=LMNB2 PE=1 SV=3 - [LMNB2_HUMAN]                                                     |
| P07942 | Laminin subunit beta-1 OS=Homo sapiens GN=LAMB1 PE=1 SV=2 - [LAMB1_HUMAN]                                       |
| Q13753 | Laminin subunit gamma-2 OS=Homo sapiens GN=LAMC2 PE=1 SV=2 - [LAMC2_HUMAN]                                      |
| Q9NS86 | LanC-like protein 2 OS=Homo sapiens GN=LANCL2 PE=1 SV=1 - [LANC2_HUMAN]                                         |
| Q6PKG0 | La-related protein 1 OS=Homo sapiens GN=LARP1 PE=1 SV=2 - [LARP1_HUMAN]                                         |
| Q01650 | Large neutral amino acids transporter small subunit 1 OS=Homo sapiens GN=SLC7A5 PE=1 SV=2 - [LAT1_HUMAN]        |
| O75387 | Large neutral amino acids transporter small subunit 3 OS=Homo sapiens GN=SLC43A1 PE=2 SV=1 - [LAT3_HUMAN]       |
| Q14696 | LDLR chaperone MESD OS=Homo sapiens GN=MESDC2 PE=1 SV=2 - [MESD_HUMAN]                                          |
| Q0VAK6 | Leiomodin-3 OS=Homo sapiens GN=LMOD3 PE=2 SV=1 - [LMOD3_HUMAN]                                                  |
| O15243 | Leptin receptor gene-related protein OS=Homo sapiens GN=LEPROT PE=1 SV=1 - [OBRG_HUMAN]                         |
| O95202 | LETM1 and EF-hand domain-containing protein 1, mitochondrial OS=Homo sapiens GN=LETM1 PE=1 SV=1 - [LETM1_HUMAN] |
| Q8N9N7 | Leucine-rich repeat-containing protein 57 OS=Homo sapiens GN=LRRC57 PE=1 SV=1 - [LRC57_HUMAN]                   |
| Q96AG4 | Leucine-rich repeat-containing protein 59 OS=Homo sapiens GN=LRRC59 PE=1 SV=1 - [LRC59_HUMAN]                   |
| P07195 | L-lactate dehydrogenase B chain OS=Homo sapiens GN=LDHB PE=1 SV=2 - [LDHB_HUMAN]                                |
| E9PH51 | L-lactate dehydrogenase OS=Homo sapiens GN=LDHA PE=3 SV=2 - [E9PH51_HUMAN]                                      |
| Q496Y0 | LON peptidase N-terminal domain and RING finger protein 3 OS=Homo sapiens GN=LONRF3 PE=1 SV=1 - [LONF3_HUMAN]   |
| O95573 | Long-chain-fatty-acid--CoA ligase 3 OS=Homo sapiens GN=ACSL3 PE=1 SV=3 - [ACSL3_HUMAN]                          |
| Q969J3 | Loss of heterozygosity 12 chromosomal region 1 protein OS=Homo sapiens GN=LOH12CR1 PE=1 SV=1 - [L12R1_HUMAN]    |
| O75096 | Low-density lipoprotein receptor-related protein 4 OS=Homo sapiens GN=LRP4 PE=1 SV=4 - [LRP4_HUMAN]             |
| P05455 | Lupus La protein OS=Homo sapiens GN=SSB PE=1 SV=2 - [LA_HUMAN]                                                  |

|        |                                                                                                                                    |
|--------|------------------------------------------------------------------------------------------------------------------------------------|
| Q7Z4W1 | L-xylulose reductase OS=Homo sapiens GN=DCXR PE=1 SV=2 - [DCXR_HUMAN]                                                              |
| Q6ZWT7 | Lysophospholipid acyltransferase 2 OS=Homo sapiens GN=MBOAT2 PE=2 SV=2 - [MBOA2_HUMAN]                                             |
| Q14108 | Lysosome membrane protein 2 OS=Homo sapiens GN=SCARB2 PE=1 SV=2 - [SCRB2_HUMAN]                                                    |
| P11279 | Lysosome-associated membrane glycoprotein 1 OS=Homo sapiens GN=LAMP1 PE=1 SV=3 - [LAMP1_HUMAN]                                     |
| P61626 | Lysozyme C OS=Homo sapiens GN=LYZ PE=1 SV=1 - [LYSC_HUMAN]                                                                         |
| A6NFX1 | Major facilitator superfamily domain-containing protein 2B OS=Homo sapiens GN=MFS2B PE=2 SV=3 - [MFS2B_HUMAN]                      |
| F5GY30 | Major prion protein OS=Homo sapiens GN=PRNP PE=3 SV=1 - [F5GY30_HUMAN]                                                             |
| P40925 | Malate dehydrogenase, cytoplasmic OS=Homo sapiens GN=MDH1 PE=1 SV=4 - [MDHC_HUMAN]                                                 |
| P40926 | Malate dehydrogenase, mitochondrial OS=Homo sapiens GN=MDH2 PE=1 SV=3 - [MDHM_HUMAN]                                               |
| Q9UM22 | Mammalian ependymin-related protein 1 OS=Homo sapiens GN=EPDR1 PE=1 SV=2 - [EPDR1_HUMAN]                                           |
| B8ZZG1 | Membrane protein, palmitoylated 6 (MAGUK p55 subfamily member 6), isoform CRA_a OS=Homo sapiens GN=MPP6 PE=4 SV=1 - [B8ZZG1_HUMAN] |
| P51811 | Membrane transport protein XK OS=Homo sapiens GN=XK PE=1 SV=5 - [XK_HUMAN]                                                         |
| O15173 | Membrane-associated progesterone receptor component 2 OS=Homo sapiens GN=PGRMC2 PE=1 SV=1 - [PGRC2_HUMAN]                          |
| P35240 | Merlin OS=Homo sapiens GN=NF2 PE=1 SV=1 - [MERL_HUMAN]                                                                             |
| P55145 | Mesencephalic astrocyte-derived neurotrophic factor OS=Homo sapiens GN=MANF PE=1 SV=3 - [MANF_HUMAN]                               |
| P50579 | Methionine aminopeptidase 2 OS=Homo sapiens GN=METAP2 PE=1 SV=1 - [AMPM2_HUMAN]                                                    |
| F5GXS7 | Methionine aminopeptidase OS=Homo sapiens GN=METAP1 PE=3 SV=1 - [F5GXS7_HUMAN]                                                     |
| P22033 | Methylmalonyl-CoA mutase, mitochondrial OS=Homo sapiens GN=MUT PE=1 SV=4 - [MUTA_HUMAN]                                            |
| Q9H8H3 | Methyltransferase-like protein 7A OS=Homo sapiens GN=METTL7A PE=1 SV=1 - [MET7A_HUMAN]                                             |
| Q6NT16 | MFS-type transporter C6orf192 OS=Homo sapiens GN=C6orf192 PE=2 SV=1 - [CF192_HUMAN]                                                |
| Q8IY33 | MICAL-like protein 2 OS=Homo sapiens GN=MICALL2 PE=1 SV=1 - [MILK2_HUMAN]                                                          |
| O14880 | Microsomal glutathione S-transferase 3 OS=Homo sapiens GN=MGST3 PE=1 SV=1 - [MGST3_HUMAN]                                          |
| Q96PK2 | Microtubule-actin cross-linking factor 1, isoform 4 OS=Homo sapiens GN=MACF1 PE=1 SV=2 - [MACF4_HUMAN]                             |
| Q15691 | Microtubule-associated protein RP/EB family member 1 OS=Homo sapiens GN=MAPRE1 PE=1 SV=3 - [MARE1_HUMAN]                           |
| Q7Z6P5 | Minichromosome maintenance complex component 3 (Fragment) OS=Homo sapiens GN=MCM3 PE=2 SV=1 - [Q7Z6P5_HUMAN]                       |
| Q8TCT9 | Minor histocompatibility antigen H13 OS=Homo sapiens GN=HM13 PE=1 SV=1 - [HM13_HUMAN]                                              |
| Q9BQT8 | Mitochondrial 2-oxodicarboxylate carrier OS=Homo sapiens GN=SLC25A21 PE=1 SV=1 - [ODC_HUMAN]                                       |
| Q02978 | Mitochondrial 2-oxoglutarate/malate carrier protein OS=Homo sapiens GN=SLC25A11 PE=1 SV=3 - [M2OM_HUMAN]                           |
| Q9Y3D6 | Mitochondrial fission 1 protein OS=Homo sapiens GN=FIS1 PE=1 SV=2 - [FIS1_HUMAN]                                                   |
| O43615 | Mitochondrial import inner membrane translocase subunit TIM44 OS=Homo sapiens GN=TIMM44 PE=1 SV=2 - [TIM44_HUMAN]                  |
| O60220 | Mitochondrial import inner membrane translocase subunit Tim8 A OS=Homo sapiens GN=TIMM8A PE=1 SV=1 - [TIM8A_HUMAN]                 |
| Q9NS69 | Mitochondrial import receptor subunit TOM22 homolog OS=Homo sapiens GN=TOMM22 PE=1 SV=3 - [TOM22_HUMAN]                            |
| O96008 | Mitochondrial import receptor subunit TOM40 homolog OS=Homo sapiens GN=TOMM40 PE=1 SV=1 - [TOM40_HUMAN]                            |
| Q96T52 | Mitochondrial inner membrane protease subunit 2 OS=Homo sapiens GN=IMMP2L PE=2 SV=1 - [IMP2L_HUMAN]                                |
| Q99797 | Mitochondrial intermediate peptidase OS=Homo sapiens GN=MIPEP PE=1 SV=2 - [MIPEP_HUMAN]                                            |
| Q9NYZ2 | Mitoferrin-1 OS=Homo sapiens GN=SLC25A37 PE=1 SV=2 - [MFRN1_HUMAN]                                                                 |
| Q9ULH7 | MKL/myocardin-like protein 2 OS=Homo sapiens GN=MKL2 PE=1 SV=3 - [MKL2_HUMAN]                                                      |
| P26038 | Moesin OS=Homo sapiens GN=MSN PE=1 SV=3 - [MOES_HUMAN]                                                                             |
| P53985 | Monocarboxylate transporter 1 OS=Homo sapiens GN=SLC16A1 PE=1 SV=3 - [MOT1_HUMAN]                                                  |
| Q9Y3A3 | Mps one binder kinase activator-like 3 OS=Homo sapiens GN=MOBK3 PE=1 SV=1 - [MOBL3_HUMAN]                                          |
| Q96T58 | Msx2-interacting protein OS=Homo sapiens GN=SPEN PE=1 SV=1 - [MINT_HUMAN]                                                          |
| O15439 | Multidrug resistance-associated protein 4 OS=Homo sapiens GN=ABCC4 PE=1 SV=3 - [MRP4_HUMAN]                                        |
| Q7Z7M0 | Multiple epidermal growth factor-like domains protein 8 OS=Homo sapiens GN=MEGF8 PE=1 SV=2 - [MEGF8_HUMAN]                         |

|        |                                                                                                                                  |
|--------|----------------------------------------------------------------------------------------------------------------------------------|
| Q9UNW1 | Multiple inositol polyphosphate phosphatase 1 OS=Homo sapiens GN=MINPP1 PE=1 SV=1 - [MINP1_HUMAN]                                |
| P05976 | Myosin light chain 1/3, skeletal muscle isoform OS=Homo sapiens GN=MYL1 PE=1 SV=3 - [MYL1_HUMAN]                                 |
| P12829 | Myosin light chain 4 OS=Homo sapiens GN=MYL4 PE=1 SV=3 - [MYL4_HUMAN]                                                            |
| P60660 | Myosin light polypeptide 6 OS=Homo sapiens GN=MYL6 PE=1 SV=2 - [MYL6_HUMAN]                                                      |
| P19105 | Myosin regulatory light chain 12A OS=Homo sapiens GN=MYL12A PE=1 SV=2 - [ML12A_HUMAN]                                            |
| Q3MIV8 | Myosin, heavy chain 11, smooth muscle OS=Homo sapiens GN=MYH11 PE=2 SV=1 - [Q3MIV8_HUMAN]                                        |
| P35580 | Myosin-10 OS=Homo sapiens GN=MYH10 PE=1 SV=3 - [MYH10_HUMAN]                                                                     |
| Q7Z406 | Myosin-14 OS=Homo sapiens GN=MYH14 PE=1 SV=2 - [MYH14_HUMAN]                                                                     |
| P35579 | Myosin-9 OS=Homo sapiens GN=MYH9 PE=1 SV=4 - [MYH9_HUMAN]                                                                        |
| O94832 | Myosin-Id OS=Homo sapiens GN=MYO1D PE=1 SV=2 - [MYO1D_HUMAN]                                                                     |
| Q13459 | Myosin-IXb OS=Homo sapiens GN=MYO9B PE=1 SV=3 - [MYO9B_HUMAN]                                                                    |
| Q9NQX4 | Myosin-Vc OS=Homo sapiens GN=MYO5C PE=1 SV=2 - [MYO5C_HUMAN]                                                                     |
| Q5FWF5 | N-acetyltransferase ESCO1 OS=Homo sapiens GN=ESCO1 PE=1 SV=3 - [ESCO1_HUMAN]                                                     |
| Q13423 | NAD(P) transhydrogenase, mitochondrial OS=Homo sapiens GN=NNT PE=1 SV=3 - [NNTM_HUMAN]                                           |
| B2RUY3 | NADH dehydrogenase (Ubiquinone) 1 beta subcomplex, 4, 15kDa OS=Homo sapiens GN=NDUFB4 PE=4 SV=1 - [B2RUY3_HUMAN]                 |
| Q9P0J0 | NADH dehydrogenase [ubiquinone] 1 alpha subcomplex subunit 13 OS=Homo sapiens GN=NDUFA13 PE=1 SV=3 - [NDUAD_HUMAN]               |
| O00483 | NADH dehydrogenase [ubiquinone] 1 alpha subcomplex subunit 4 OS=Homo sapiens GN=NDUFA4 PE=1 SV=1 - [NDUA4_HUMAN]                 |
| P56556 | NADH dehydrogenase [ubiquinone] 1 alpha subcomplex subunit 6 OS=Homo sapiens GN=NDUFA6 PE=1 SV=3 - [NDUA6_HUMAN]                 |
| O95182 | NADH dehydrogenase [ubiquinone] 1 alpha subcomplex subunit 7 OS=Homo sapiens GN=NDUFA7 PE=1 SV=3 - [NDUA7_HUMAN]                 |
| O96000 | NADH dehydrogenase [ubiquinone] 1 beta subcomplex subunit 10 OS=Homo sapiens GN=NDUFB10 PE=1 SV=3 - [NDUBA_HUMAN]                |
| Q9NX14 | NADH dehydrogenase [ubiquinone] 1 beta subcomplex subunit 11, mitochondrial OS=Homo sapiens GN=NDUFB11 PE=1 SV=1 - [NDUBB_HUMAN] |
| P17568 | NADH dehydrogenase [ubiquinone] 1 beta subcomplex subunit 7 OS=Homo sapiens GN=NDUFB7 PE=1 SV=4 - [NDUB7_HUMAN]                  |
| E9PRB2 | NADH dehydrogenase [ubiquinone] 1 subunit C2 OS=Homo sapiens GN=NDUFC2 PE=3 SV=1 - [E9PRB2_HUMAN]                                |
| P19404 | NADH dehydrogenase [ubiquinone] flavoprotein 2, mitochondrial OS=Homo sapiens GN=NDUFV2 PE=1 SV=2 - [NDUV2_HUMAN]                |
| P56181 | NADH dehydrogenase [ubiquinone] flavoprotein 3, mitochondrial OS=Homo sapiens GN=NDUFV3 PE=1 SV=2 - [NDUV3_HUMAN]                |
| O75489 | NADH dehydrogenase [ubiquinone] iron-sulfur protein 3, mitochondrial OS=Homo sapiens GN=NDUFS3 PE=1 SV=1 - [NDUS3_HUMAN]         |
| O43181 | NADH dehydrogenase [ubiquinone] iron-sulfur protein 4, mitochondrial OS=Homo sapiens GN=NDUFS4 PE=1 SV=1 - [NDUS4_HUMAN]         |
| O75380 | NADH dehydrogenase [ubiquinone] iron-sulfur protein 6, mitochondrial OS=Homo sapiens GN=NDUFS6 PE=1 SV=1 - [NDUS6_HUMAN]         |
| Q9UHQ9 | NADH-cytochrome b5 reductase 1 OS=Homo sapiens GN=CYB5R1 PE=1 SV=1 - [NB5R1_HUMAN]                                               |
| P00387 | NADH-cytochrome b5 reductase 3 OS=Homo sapiens GN=CYB5R3 PE=1 SV=3 - [NB5R3_HUMAN]                                               |
| Q13765 | Nascent polypeptide-associated complex subunit alpha OS=Homo sapiens GN=NACA PE=1 SV=1 - [NACA_HUMAN]                            |
| P20929 | Nebulin OS=Homo sapiens GN=NEB PE=1 SV=4 - [NEBU_HUMAN]                                                                          |
| Q15843 | NEDD8 OS=Homo sapiens GN=NEDD8 PE=1 SV=1 - [NEDD8_HUMAN]                                                                         |
| Q8WXH0 | Nesprin-2 OS=Homo sapiens GN=SYNE2 PE=1 SV=3 - [SYNE2_HUMAN]                                                                     |
| Q9UMX5 | Neudesin OS=Homo sapiens GN=NENF PE=1 SV=1 - [NENF_HUMAN]                                                                        |
| A2RRP1 | Neuroblastoma-amplified sequence OS=Homo sapiens GN=NBAS PE=1 SV=2 - [NBAS_HUMAN]                                                |
| Q9HB89 | Neuromedin-U receptor 1 OS=Homo sapiens GN=NMUR1 PE=2 SV=1 - [NMUR1_HUMAN]                                                       |
| B2RAL7 | Neuroplastin OS=Homo sapiens GN=NPTN PE=2 SV=1 - [B2RAL7_HUMAN]                                                                  |
| Q14697 | Neutral alpha-glucosidase AB OS=Homo sapiens GN=GANAB PE=1 SV=3 - [GANAB_HUMAN]                                                  |
| Q15758 | Neutral amino acid transporter B(0) OS=Homo sapiens GN=SLC1A5 PE=1 SV=2 - [AAAT_HUMAN]                                           |
| Q6PIU2 | Neutral cholesterol ester hydrolase 1 OS=Homo sapiens GN=NCEH1 PE=1 SV=3 - [NCEH1_HUMAN]                                         |
| P59665 | Neutrophil defensin 1 OS=Homo sapiens GN=DEFA1 PE=1 SV=1 - [DEF1_HUMAN]                                                          |
| Q5BKU3 | NIN protein OS=Homo sapiens GN=NIN PE=2 SV=1 - [Q5BKU3_HUMAN]                                                                    |

|        |                                                                                                                      |
|--------|----------------------------------------------------------------------------------------------------------------------|
| Q6KC79 | Nipped-B-like protein OS=Homo sapiens GN=NIPBL PE=1 SV=2 - [NIPBL_HUMAN]                                             |
| Q9NPP4 | NLR family CARD domain-containing protein 4 OS=Homo sapiens GN=NLRC4 PE=1 SV=2 - [NLRC4_HUMAN]                       |
| Q49AL4 | NMNAT3 protein OS=Homo sapiens GN=NMNAT3 PE=2 SV=1 - [Q49AL4_HUMAN]                                                  |
| P69849 | Nodal modulator 3 OS=Homo sapiens GN=NOMO3 PE=2 SV=2 - [NOMO3_HUMAN]                                                 |
| B7ZBA8 | Novel protein OS=Homo sapiens GN=CCDC154 PE=4 SV=1 - [B7ZBA8_HUMAN]                                                  |
| Q5JQQ4 | Novel protein OS=Homo sapiens GN=RP11-529I10.4 PE=2 SV=1 - [Q5JQQ4_HUMAN]                                            |
| Q9UNZ2 | NSFL1 cofactor p47 OS=Homo sapiens GN=NSFL1C PE=1 SV=2 - [NSF1C_HUMAN]                                               |
| B1AKN7 | Nuclear factor 1 OS=Homo sapiens GN=NFA1 PE=3 SV=1 - [B1AKN7_HUMAN]                                                  |
| Q5VW31 | Nuclear factor I/B OS=Homo sapiens GN=NFIB PE=2 SV=1 - [Q5VW31_HUMAN]                                                |
| Q16649 | Nuclear factor interleukin-3-regulated protein OS=Homo sapiens GN=NFIL3 PE=1 SV=2 - [NFIL3_HUMAN]                    |
| B5B2M6 | Nuclear factor of activated T-cells c1 isoform IA-deltaIX OS=Homo sapiens GN=NFATC1 PE=2 SV=1 - [B5B2M6_HUMAN]       |
| Q9Y266 | Nuclear migration protein nudC OS=Homo sapiens GN=NUDC PE=1 SV=1 - [NUDC_HUMAN]                                      |
| Q14980 | Nuclear mitotic apparatus protein 1 OS=Homo sapiens GN=NUMA1 PE=1 SV=2 - [NUMA1_HUMAN]                               |
| Q14686 | Nuclear receptor coactivator 6 OS=Homo sapiens GN=NCOA6 PE=1 SV=3 - [NCOA6_HUMAN]                                    |
| P61970 | Nuclear transport factor 2 OS=Homo sapiens GN=NUTF2 PE=1 SV=1 - [NUTF2_HUMAN]                                        |
| Q9H1E3 | Nuclear ubiquitous casein and cyclin-dependent kinases substrate OS=Homo sapiens GN=NUCKS1 PE=1 SV=1 - [NUCKS_HUMAN] |
| P67809 | Nuclease-sensitive element-binding protein 1 OS=Homo sapiens GN=YBX1 PE=1 SV=3 - [YBOX1_HUMAN]                       |
| Q02818 | Nucleobindin-1 OS=Homo sapiens GN=NUCB1 PE=1 SV=4 - [NUCB1_HUMAN]                                                    |
| P19338 | Nucleolin OS=Homo sapiens GN=NCL PE=1 SV=3 - [NUCL_HUMAN]                                                            |
| Q9BYG9 | Nucleophosmin (Nucleolar phosphoprotein B23, numatrin) OS=Homo sapiens GN=NPM1 PE=2 SV=1 - [Q9BYG9_HUMAN]            |
| P12270 | Nucleoprotein TPR OS=Homo sapiens GN=TPR PE=1 SV=3 - [TPR_HUMAN]                                                     |
| B3KV44 | Nucleosome assembly protein 1-like 1, isoform CRA_c OS=Homo sapiens GN=NAP1L1 PE=2 SV=1 - [B3KV44_HUMAN]             |
| Q4LE47 | NUP153 variant protein (Fragment) OS=Homo sapiens GN=NUP153 variant protein PE=2 SV=1 - [Q4LE47_HUMAN]               |
| Q9NTK5 | Obg-like ATPase 1 OS=Homo sapiens GN=OLA1 PE=1 SV=2 - [OLA1_HUMAN]                                                   |
| Q8NH19 | Olfactory receptor 10AG1 OS=Homo sapiens GN=OR10AG1 PE=2 SV=1 - [O10AG_HUMAN]                                        |
| Q8NH49 | Olfactory receptor 4X1 OS=Homo sapiens GN=OR4X1 PE=2 SV=1 - [OR4X1_HUMAN]                                            |
| O95007 | Olfactory receptor 6B1 OS=Homo sapiens GN=OR6B1 PE=2 SV=1 - [OR6B1_HUMAN]                                            |
| Q96CV9 | Optineurin OS=Homo sapiens GN=OPTN PE=1 SV=2 - [OPTN_HUMAN]                                                          |
| P04181 | Ornithine aminotransferase, mitochondrial OS=Homo sapiens GN=OAT PE=1 SV=1 - [OAT_HUMAN]                             |
| Q8N6M0 | OTU domain-containing protein 6B OS=Homo sapiens GN=OTUD6B PE=1 SV=1 - [OTU6B_HUMAN]                                 |
| Q8TE49 | OTU domain-containing protein 7A OS=Homo sapiens GN=OTUD7A PE=1 SV=1 - [OTU7A_HUMAN]                                 |
| B4DTR3 | Oxysterol-binding protein OS=Homo sapiens GN=OSBP2 PE=2 SV=1 - [B4DTR3_HUMAN]                                        |
| F5H7T2 | Oxysterol-binding protein OS=Homo sapiens GN=OSBPL8 PE=3 SV=1 - [F5H7T2_HUMAN]                                       |
| P51582 | P2Y purinoceptor 4 OS=Homo sapiens GN=P2RY4 PE=1 SV=1 - [P2RY4_HUMAN]                                                |
| Q5T0S4 | Palmitoyl-protein thioesterase 1 (Fragment) OS=Homo sapiens GN=PPT1 PE=2 SV=1 - [Q5T0S4_HUMAN]                       |
| Q96RD7 | Pannexin-1 OS=Homo sapiens GN=PANX1 PE=1 SV=4 - [PANX1_HUMAN]                                                        |
| Q8TD49 | PAP1 OS=Homo sapiens GN=PAP1 PE=2 SV=1 - [Q8TD49_HUMAN]                                                              |
| Q9BRP8 | Partner of Y14 and mago OS=Homo sapiens GN=WIBG PE=1 SV=1 - [WIBG_HUMAN]                                             |
| Q8NEN9 | PDZ domain-containing protein 8 OS=Homo sapiens GN=PDZD8 PE=1 SV=1 - [PDZD8_HUMAN]                                   |
| O75127 | Pentatricopeptide repeat-containing protein 1 OS=Homo sapiens GN=PTCD1 PE=1 SV=2 - [PTCD1_HUMAN]                     |
| P62937 | Peptidyl-prolyl cis-trans isomerase A OS=Homo sapiens GN=PPIA PE=1 SV=2 - [PPIA_HUMAN]                               |
| P23284 | Peptidyl-prolyl cis-trans isomerase B OS=Homo sapiens GN=PPIB PE=1 SV=2 - [PPIB_HUMAN]                               |
| Q00688 | Peptidyl-prolyl cis-trans isomerase FKBP3 OS=Homo sapiens GN=FKBP3 PE=1 SV=1 - [FKBP3_HUMAN]                         |

|        |                                                                                                                   |
|--------|-------------------------------------------------------------------------------------------------------------------|
| Q02790 | Peptidyl-prolyl cis-trans isomerase FKBP4 OS=Homo sapiens GN=FKBP4 PE=1 SV=3 - [FKBP4_HUMAN]                      |
| Q14318 | Peptidyl-prolyl cis-trans isomerase FKBP8 OS=Homo sapiens GN=FKBP8 PE=1 SV=2 - [FKBP8_HUMAN]                      |
| Q9Y237 | Peptidyl-prolyl cis-trans isomerase NIMA-interacting 4 OS=Homo sapiens GN=PIN4 PE=1 SV=1 - [PIN4_HUMAN]           |
| Q9Y3E5 | Peptidyl-tRNA hydrolase 2, mitochondrial OS=Homo sapiens GN=PTRH2 PE=1 SV=1 - [PTH2_HUMAN]                        |
| Q9BXM0 | Periaxin OS=Homo sapiens GN=PRX PE=1 SV=2 - [PRAX_HUMAN]                                                          |
| O60664 | Perilipin-3 OS=Homo sapiens GN=PLIN3 PE=1 SV=3 - [PLIN3_HUMAN]                                                    |
| O60437 | Periplakin OS=Homo sapiens GN=PPL PE=1 SV=4 - [PEPL_HUMAN]                                                        |
| Q06830 | Peroxiredoxin-1 OS=Homo sapiens GN=PRDX1 PE=1 SV=1 - [PRDX1_HUMAN]                                                |
| P32119 | Peroxiredoxin-2 OS=Homo sapiens GN=PRDX2 PE=1 SV=5 - [PRDX2_HUMAN]                                                |
| P30044 | Peroxiredoxin-5, mitochondrial OS=Homo sapiens GN=PRDX5 PE=1 SV=4 - [PRDX5_HUMAN]                                 |
| P30041 | Peroxiredoxin-6 OS=Homo sapiens GN=PRDX6 PE=1 SV=3 - [PRDX6_HUMAN]                                                |
| O75192 | Peroxisomal membrane protein 11A OS=Homo sapiens GN=PEX11A PE=1 SV=1 - [PX11A_HUMAN]                              |
| Q8WW12 | PEST proteolytic signal-containing nuclear protein OS=Homo sapiens GN=PCNP PE=1 SV=2 - [PCNP_HUMAN]               |
| Q5JWZ0 | PHD finger protein 20 (Fragment) OS=Homo sapiens GN=PHF20 PE=2 SV=1 - [Q5JWZ0_HUMAN]                              |
| Q9Y285 | Phenylalanyl-tRNA synthetase alpha chain OS=Homo sapiens GN=FARSA PE=1 SV=3 - [SYFA_HUMAN]                        |
| Q9NSD9 | Phenylalanyl-tRNA synthetase beta chain OS=Homo sapiens GN=FARSB PE=1 SV=3 - [SYFB_HUMAN]                         |
| B7ZL07 | PHKA1 protein OS=Homo sapiens GN=PHKA1 PE=2 SV=1 - [B7ZL07_HUMAN]                                                 |
| Q13371 | Phosducin-like protein OS=Homo sapiens GN=PDCL PE=1 SV=3 - [PHLP_HUMAN]                                           |
| Q00325 | Phosphate carrier protein, mitochondrial OS=Homo sapiens GN=SLC25A3 PE=1 SV=2 - [MPCP_HUMAN]                      |
| Q92539 | Phosphatidate phosphatase LPIN2 OS=Homo sapiens GN=LPIN2 PE=1 SV=1 - [LPIN2_HUMAN]                                |
| Q9BTU6 | Phosphatidylinositol 4-kinase type 2-alpha OS=Homo sapiens GN=PI4K2A PE=1 SV=1 - [P4K2A_HUMAN]                    |
| Q92835 | Phosphatidylinositol-3,4,5-trisphosphate 5-phosphatase 1 OS=Homo sapiens GN=INPP5D PE=1 SV=2 - [SHIP1_HUMAN]      |
| P48426 | Phosphatidylinositol-5-phosphate 4-kinase type-2 alpha OS=Homo sapiens GN=PIP4K2A PE=1 SV=2 - [PI42A_HUMAN]       |
| Q13492 | Phosphatidylinositol-binding clathrin assembly protein OS=Homo sapiens GN=PICALM PE=1 SV=2 - [PICAL_HUMAN]        |
| Q16822 | Phosphoenolpyruvate carboxykinase [GTP], mitochondrial OS=Homo sapiens GN=PCK2 PE=1 SV=3 - [PCKGM_HUMAN]          |
| B7Z7A9 | Phosphoglycerate kinase OS=Homo sapiens GN=PGK1 PE=2 SV=1 - [B7Z7A9_HUMAN]                                        |
| P15259 | Phosphoglycerate mutase 2 OS=Homo sapiens GN=PGAM2 PE=1 SV=3 - [PGAM2_HUMAN]                                      |
| Q99570 | Phosphoinositide 3-kinase regulatory subunit 4 OS=Homo sapiens GN=PIK3R4 PE=1 SV=3 - [PI3R4_HUMAN]                |
| Q9Y263 | Phospholipase A-2-activating protein OS=Homo sapiens GN=PLAA PE=1 SV=2 - [PLAP_HUMAN]                             |
| P36969 | Phospholipid hydroperoxide glutathione peroxidase, mitochondrial OS=Homo sapiens GN=GPX4 PE=1 SV=3 - [GPX4_HUMAN] |
| Q6ZR73 | Phospholipid scramblase 4, isoform CRA_a OS=Homo sapiens GN=PLSCR4 PE=2 SV=1 - [Q6ZR73_HUMAN]                     |
| O60256 | Phosphoribosyl pyrophosphate synthase-associated protein 2 OS=Homo sapiens GN=PRPSAP2 PE=1 SV=1 - [KPRB_HUMAN]    |
| Q93100 | Phosphorylase b kinase regulatory subunit beta OS=Homo sapiens GN=PHKB PE=1 SV=3 - [KPBB_HUMAN]                   |
| Q9GZP4 | PITH domain-containing protein 1 OS=Homo sapiens GN=PITHD1 PE=1 SV=1 - [PITH1_HUMAN]                              |
| P20020 | Plasma membrane calcium-transporting ATPase 1 OS=Homo sapiens GN=ATP2B1 PE=1 SV=3 - [AT2B1_HUMAN]                 |
| Q16720 | Plasma membrane calcium-transporting ATPase 3 OS=Homo sapiens GN=ATP2B3 PE=1 SV=3 - [AT2B3_HUMAN]                 |
| P23634 | Plasma membrane calcium-transporting ATPase 4 OS=Homo sapiens GN=ATP2B4 PE=1 SV=2 - [AT2B4_HUMAN]                 |
| Q8NC51 | Plasminogen activator inhibitor 1 RNA-binding protein OS=Homo sapiens GN=SERBP1 PE=1 SV=2 - [PAIRB_HUMAN]         |
| Q14651 | Plastin-1 OS=Homo sapiens GN=PLS1 PE=1 SV=2 - [PLSI_HUMAN]                                                        |
| P13796 | Plastin-2 OS=Homo sapiens GN=LCP1 PE=1 SV=6 - [PLSL_HUMAN]                                                        |
| Q8IVE3 | Pleckstrin homology domain-containing family H member 2 OS=Homo sapiens GN=PLEKHH2 PE=2 SV=2 - [PKHH2_HUMAN]      |
| Q9NYT0 | Pleckstrin-2 OS=Homo sapiens GN=PLEK2 PE=1 SV=1 - [PLEK2_HUMAN]                                                   |
| B1ANR0 | Poly(A) binding protein, cytoplasmic 4 (Inducible form) OS=Homo sapiens GN=PABPC4 PE=4 SV=1 - [B1ANR0_HUMAN]      |

|        |                                                                                                                           |
|--------|---------------------------------------------------------------------------------------------------------------------------|
| Q68Y55 | Poly(RC) binding protein 2 OS=Homo sapiens GN=PCBP2 PE=2 SV=1 - [Q68Y55_HUMAN]                                            |
| Q15365 | Poly(rC)-binding protein 1 OS=Homo sapiens GN=PCBP1 PE=1 SV=2 - [PCBP1_HUMAN]                                             |
| P11940 | Polyadenylate-binding protein 1 OS=Homo sapiens GN=PABPC1 PE=1 SV=2 - [PABP1_HUMAN]                                       |
| Q9Y257 | Polymerase delta-interacting protein 2 OS=Homo sapiens GN=POLDIP2 PE=1 SV=1 - [PDIP2_HUMAN]                               |
| P26599 | Polypyrimidine tract-binding protein 1 OS=Homo sapiens GN=PTBP1 PE=1 SV=1 - [PTBP1_HUMAN]                                 |
| B2RU33 | POTE ankyrin domain family member C OS=Homo sapiens GN=POTEC PE=2 SV=2 - [POTEC_HUMAN]                                    |
| Q9UHV9 | Prefoldin subunit 2 OS=Homo sapiens GN=PFDN2 PE=1 SV=1 - [PFD2_HUMAN]                                                     |
| Q9NQP4 | Prefoldin subunit 4 OS=Homo sapiens GN=PFDN4 PE=1 SV=1 - [PFD4_HUMAN]                                                     |
| Q8N945 | PRELI domain-containing protein 2 OS=Homo sapiens GN=PRELID2 PE=2 SV=1 - [PRLD2_HUMAN]                                    |
| Q5VTL8 | Pre-mRNA-splicing factor 38B OS=Homo sapiens GN=PRPF38B PE=1 SV=1 - [PR38B_HUMAN]                                         |
| Q9BUB1 | PRKAR2A protein OS=Homo sapiens GN=PRKAR2A PE=2 SV=1 - [Q9BUB1_HUMAN]                                                     |
| P07602 | Proactivator polypeptide OS=Homo sapiens GN=PSAP PE=1 SV=2 - [SAP_HUMAN]                                                  |
| Q9BUQ8 | Probable ATP-dependent RNA helicase DDX23 OS=Homo sapiens GN=DDX23 PE=1 SV=3 - [DDX23_HUMAN]                              |
| Q9Y235 | Probable C->U-editing enzyme APOBEC-2 OS=Homo sapiens GN=APOBEC2 PE=1 SV=1 - [ABEC2_HUMAN]                                |
| Q9HD20 | Probable cation-transporting ATPase 13A1 OS=Homo sapiens GN=ATP13A1 PE=1 SV=2 - [AT131_HUMAN]                             |
| Q9Y4D8 | Probable E3 ubiquitin-protein ligase C12orf51 OS=Homo sapiens GN=C12orf51 PE=1 SV=5 - [K0614_HUMAN]                       |
| P51531 | Probable global transcription activator SNF2L2 OS=Homo sapiens GN=SMARCA2 PE=1 SV=2 - [SMCA2_HUMAN]                       |
| Q13395 | Probable methyltransferase TARBP1 OS=Homo sapiens GN=TARBP1 PE=1 SV=1 - [TARB1_HUMAN]                                     |
| Q9UHF3 | Probable N-acetyltransferase 8B OS=Homo sapiens GN=NAT8B PE=2 SV=1 - [NAT8B_HUMAN]                                        |
| Q9H3G5 | Probable serine carboxypeptidase CPVL OS=Homo sapiens GN=CPVL PE=1 SV=2 - [CPVL_HUMAN]                                    |
| Q93008 | Probable ubiquitin carboxyl-terminal hydrolase FAF-X OS=Homo sapiens GN=USP9X PE=1 SV=3 - [USP9X_HUMAN]                   |
| O00507 | Probable ubiquitin carboxyl-terminal hydrolase FAF-Y OS=Homo sapiens GN=USP9Y PE=1 SV=2 - [USP9Y_HUMAN]                   |
| Q8NBJ5 | Procollagen galactosyltransferase 1 OS=Homo sapiens GN=GLT25D1 PE=1 SV=1 - [GT251_HUMAN]                                  |
| P07737 | Profilin-1 OS=Homo sapiens GN=PFN1 PE=1 SV=2 - [PROF1_HUMAN]                                                              |
| Q6ZVX9 | Progesterin and adipoQ receptor family member 9 OS=Homo sapiens GN=PAQR9 PE=2 SV=1 - [PAQR9_HUMAN]                        |
| O14737 | Programmed cell death protein 5 OS=Homo sapiens GN=PDCD5 PE=1 SV=3 - [PDCD5_HUMAN]                                        |
| Q99623 | Prohibitin-2 OS=Homo sapiens GN=PHB2 PE=1 SV=2 - [PHB2_HUMAN]                                                             |
| Q9UQ80 | Proliferation-associated protein 2G4 OS=Homo sapiens GN=PA2G4 PE=1 SV=3 - [PA2G4_HUMAN]                                   |
| Q9BRP4 | Proteasomal ATPase-associated factor 1 OS=Homo sapiens GN=PAAF1 PE=1 SV=2 - [PAAF1_HUMAN]                                 |
| Q16186 | Proteasomal ubiquitin receptor ADRM1 OS=Homo sapiens GN=ADRM1 PE=1 SV=2 - [ADRM1_HUMAN]                                   |
| A8K3Z3 | Proteasome (Prosome, macropain) 26S subunit, ATPase, 5, isoform CRA_b OS=Homo sapiens GN=PSMC5 PE=2 SV=1 - [A8K3Z3_HUMAN] |
| B1AJY5 | Proteasome (Prosome, macropain) 26S subunit, non-ATPase, 10 OS=Homo sapiens GN=PSMD10 PE=4 SV=1 - [B1AJY5_HUMAN]          |
| Q06323 | Proteasome activator complex subunit 1 OS=Homo sapiens GN=PSME1 PE=1 SV=1 - [PSME1_HUMAN]                                 |
| Q9UL46 | Proteasome activator complex subunit 2 OS=Homo sapiens GN=PSME2 PE=1 SV=4 - [PSME2_HUMAN]                                 |
| P25786 | Proteasome subunit alpha type-1 OS=Homo sapiens GN=PSMA1 PE=1 SV=1 - [PSA1_HUMAN]                                         |
| P25787 | Proteasome subunit alpha type-2 OS=Homo sapiens GN=PSMA2 PE=1 SV=2 - [PSA2_HUMAN]                                         |
| P25788 | Proteasome subunit alpha type-3 OS=Homo sapiens GN=PSMA3 PE=1 SV=2 - [PSA3_HUMAN]                                         |
| P25789 | Proteasome subunit alpha type-4 OS=Homo sapiens GN=PSMA4 PE=1 SV=1 - [PSA4_HUMAN]                                         |
| P28066 | Proteasome subunit alpha type-5 OS=Homo sapiens GN=PSMA5 PE=1 SV=3 - [PSA5_HUMAN]                                         |
| P60900 | Proteasome subunit alpha type-6 OS=Homo sapiens GN=PSMA6 PE=1 SV=1 - [PSA6_HUMAN]                                         |
| O14818 | Proteasome subunit alpha type-7 OS=Homo sapiens GN=PSMA7 PE=1 SV=1 - [PSA7_HUMAN]                                         |
| P20618 | Proteasome subunit beta type-1 OS=Homo sapiens GN=PSMB1 PE=1 SV=2 - [PSB1_HUMAN]                                          |
| P49721 | Proteasome subunit beta type-2 OS=Homo sapiens GN=PSMB2 PE=1 SV=1 - [PSB2_HUMAN]                                          |

|        |                                                                                                                             |
|--------|-----------------------------------------------------------------------------------------------------------------------------|
| P49720 | Proteasome subunit beta type-3 OS=Homo sapiens GN=PSMB3 PE=1 SV=2 - [PSB3_HUMAN]                                            |
| P28070 | Proteasome subunit beta type-4 OS=Homo sapiens GN=PSMB4 PE=1 SV=4 - [PSB4_HUMAN]                                            |
| P28074 | Proteasome subunit beta type-5 OS=Homo sapiens GN=PSMB5 PE=1 SV=3 - [PSB5_HUMAN]                                            |
| P28072 | Proteasome subunit beta type-6 OS=Homo sapiens GN=PSMB6 PE=1 SV=4 - [PSB6_HUMAN]                                            |
| Q99436 | Proteasome subunit beta type-7 OS=Homo sapiens GN=PSMB7 PE=1 SV=1 - [PSB7_HUMAN]                                            |
| Q5VYK3 | Proteasome-associated protein ECM29 homolog OS=Homo sapiens GN=ECM29 PE=1 SV=2 - [ECM29_HUMAN]                              |
| P11171 | Protein 4.1 OS=Homo sapiens GN=EPB41 PE=1 SV=4 - [41_HUMAN]                                                                 |
| O14744 | Protein arginine N-methyltransferase 5 OS=Homo sapiens GN=PRMT5 PE=1 SV=4 - [ANM5_HUMAN]                                    |
| Q9UKV8 | Protein argonaute-2 OS=Homo sapiens GN=EIF2C2 PE=1 SV=3 - [AGO2_HUMAN]                                                      |
| Q9Y2B0 | Protein canopy homolog 2 OS=Homo sapiens GN=CNPY2 PE=1 SV=1 - [CNPY2_HUMAN]                                                 |
| Q9BT09 | Protein canopy homolog 3 OS=Homo sapiens GN=CNPY3 PE=1 SV=1 - [CNPY3_HUMAN]                                                 |
| Q9UKY7 | Protein CDV3 homolog OS=Homo sapiens GN=CDV3 PE=1 SV=1 - [CDV3_HUMAN]                                                       |
| Q8TCG1 | Protein CIP2A OS=Homo sapiens GN=KIAA1524 PE=1 SV=2 - [CIP2A_HUMAN]                                                         |
| Q5TDH0 | Protein DDI1 homolog 2 OS=Homo sapiens GN=DDI2 PE=1 SV=1 - [DDI2_HUMAN]                                                     |
| P13667 | Protein disulfide-isomerase A4 OS=Homo sapiens GN=PDIA4 PE=1 SV=2 - [PDIA4_HUMAN]                                           |
| P07237 | Protein disulfide-isomerase OS=Homo sapiens GN=P4HB PE=1 SV=3 - [PDIA1_HUMAN]                                               |
| Q99497 | Protein DJ-1 OS=Homo sapiens GN=PARK7 PE=1 SV=2 - [PARK7_HUMAN]                                                             |
| Q8WYP5 | Protein ELYS OS=Homo sapiens GN=AHCTF1 PE=1 SV=3 - [ELYS_HUMAN]                                                             |
| P49257 | Protein ERGIC-53 OS=Homo sapiens GN=LMAN1 PE=1 SV=2 - [LMAN1_HUMAN]                                                         |
| Q9NRY5 | Protein FAM114A2 OS=Homo sapiens GN=FAM114A2 PE=1 SV=4 - [F1142_HUMAN]                                                      |
| Q9BUT9 | Protein FAM195A OS=Homo sapiens GN=FAM195A PE=1 SV=2 - [F195A_HUMAN]                                                        |
| Q6UWF7 | Protein FAM55D OS=Homo sapiens GN=FAM55D PE=2 SV=1 - [FA55D_HUMAN]                                                          |
| Q96KN4 | Protein FAM84A OS=Homo sapiens GN=FAM84A PE=1 SV=2 - [FA84A_HUMAN]                                                          |
| Q68CZ1 | Protein fantom OS=Homo sapiens GN=RPGRIP1L PE=1 SV=2 - [FTM_HUMAN]                                                          |
| O94992 | Protein HEXIM1 OS=Homo sapiens GN=HEXIM1 PE=1 SV=1 - [HEXI1_HUMAN]                                                          |
| B0QYG7 | Protein kinase C and casein kinase substrate in neurons 2 (Fragment) OS=Homo sapiens GN=PAC SIN2 PE=4 SV=1 - [B0QYG7_HUMAN] |
| Q96RT1 | Protein LAP2 OS=Homo sapiens GN=ERBB2IP PE=1 SV=2 - [LAP2_HUMAN]                                                            |
| Q9NUP9 | Protein lin-7 homolog C OS=Homo sapiens GN=LIN7C PE=1 SV=1 - [LIN7C_HUMAN]                                                  |
| P12524 | Protein L-Myc-1 OS=Homo sapiens GN=MYCL1 PE=1 SV=2 - [MYCL1_HUMAN]                                                          |
| Q9BZQ8 | Protein Niban OS=Homo sapiens GN=FAM129A PE=1 SV=1 - [NIBAN_HUMAN]                                                          |
| Q9BRX2 | Protein pelota homolog OS=Homo sapiens GN=PELO PE=1 SV=2 - [PELO_HUMAN]                                                     |
| O75688 | Protein phosphatase 1B OS=Homo sapiens GN=PPM1B PE=1 SV=1 - [PPM1B_HUMAN]                                                   |
| Q59GB2 | Protein phosphatase 1G variant (Fragment) OS=Homo sapiens PE=2 SV=1 - [Q59GB2_HUMAN]                                        |
| Q9Y570 | Protein phosphatase methylesterase 1 OS=Homo sapiens GN=PPME1 PE=1 SV=3 - [PPME1_HUMAN]                                     |
| Q92508 | Protein PIEZO1 OS=Homo sapiens GN=FAM38A PE=1 SV=4 - [PIEZ1_HUMAN]                                                          |
| Q9P258 | Protein RCC2 OS=Homo sapiens GN=RCC2 PE=1 SV=2 - [RCC2_HUMAN]                                                               |
| O15258 | Protein RER1 OS=Homo sapiens GN=RER1 PE=1 SV=1 - [RER1_HUMAN]                                                               |
| P06703 | Protein S100-A6 OS=Homo sapiens GN=S100A6 PE=1 SV=1 - [S10A6_HUMAN]                                                         |
| P05109 | Protein S100-A8 OS=Homo sapiens GN=S100A8 PE=1 SV=1 - [S10A8_HUMAN]                                                         |
| A2A3K4 | Protein tyrosine phosphatase domain-containing protein 1 OS=Homo sapiens GN=PTPDC1 PE=2 SV=1 - [PTPC1_HUMAN]                |
| Q8IWX7 | Protein unc-45 homolog B OS=Homo sapiens GN=UNC45B PE=2 SV=1 - [UN45B_HUMAN]                                                |
| Q08AM6 | Protein VAC14 homolog OS=Homo sapiens GN=VAC14 PE=1 SV=1 - [VAC14_HUMAN]                                                    |
| O75695 | Protein XRP2 OS=Homo sapiens GN=RP2 PE=1 SV=4 - [XRP2_HUMAN]                                                                |

|        |                                                                                                            |
|--------|------------------------------------------------------------------------------------------------------------|
| Q9Y5H8 | Protocadherin alpha-3 OS=Homo sapiens GN=PCDHA3 PE=1 SV=1 - [PCDA3_HUMAN]                                  |
| Q9Y5G9 | Protocadherin gamma-A4 OS=Homo sapiens GN=PCDHGA4 PE=2 SV=1 - [PCDG4_HUMAN]                                |
| P61457 | Pterin-4-alpha-carbinolamine dehydratase OS=Homo sapiens GN=PCBD1 PE=1 SV=2 - [PHS_HUMAN]                  |
| A2VCM6 | PTMS protein (Fragment) OS=Homo sapiens GN=PTMS PE=2 SV=1 - [A2VCM6_HUMAN]                                 |
| P00491 | Purine nucleoside phosphorylase OS=Homo sapiens GN=PNP PE=1 SV=2 - [PNPH_HUMAN]                            |
| Q5NE16 | Putative cathepsin L-like protein 3 OS=Homo sapiens GN=CTSL3 PE=5 SV=1 - [CATL3_HUMAN]                     |
| Q9Y315 | Putative deoxyribose-phosphate aldolase OS=Homo sapiens GN=DERA PE=1 SV=2 - [DEOC_HUMAN]                   |
| A6NDK9 | Putative golgin subfamily A member 6C OS=Homo sapiens GN=GOLGA6C PE=5 SV=1 - [GOG6C_HUMAN]                 |
| Q5TCQ7 | Putative homeodomain transcription factor 1 (Fragment) OS=Homo sapiens GN=PHTF1 PE=2 SV=1 - [Q5TCQ7_HUMAN] |
| A6ND91 | Putative L-aspartate dehydrogenase OS=Homo sapiens GN=ASPDH PE=2 SV=2 - [ASPD_HUMAN]                       |
| P59922 | Putative olfactory receptor 2B8 OS=Homo sapiens GN=OR2B8P PE=5 SV=1 - [OR2B8_HUMAN]                        |
| A2A3N6 | Putative PIP5K1A and PSMD4-like protein OS=Homo sapiens GN=PIPSL PE=5 SV=1 - [PIPSL_HUMAN]                 |
| Q495Y7 | Putative speedy protein E7 OS=Homo sapiens GN=SPDYE7P PE=5 SV=1 - [SPDE7_HUMAN]                            |
| Q5QP74 | Putative uncharacterized protein C10orf115 OS=Homo sapiens GN=C10orf115 PE=2 SV=2 - [CJ115_HUMAN]          |
| Q6ZS72 | Putative uncharacterized protein C19orf35 OS=Homo sapiens GN=C19orf35 PE=2 SV=1 - [CS035_HUMAN]            |
| Q5SQ13 | Putative uncharacterized protein C9orf141 OS=Homo sapiens GN=C9orf141 PE=2 SV=1 - [CI141_HUMAN]            |
| Q5HYI5 | Putative uncharacterized protein DKFZp313C1541 OS=Homo sapiens GN=DKFZp313C1541 PE=2 SV=1 - [Q5HYI5_HUMAN] |
| Q9Y427 | Putative uncharacterized protein DKFZp586K2222 OS=Homo sapiens GN=DKFZp586K2222 PE=2 SV=2 - [Q9Y427_HUMAN] |
| Q6MZR2 | Putative uncharacterized protein DKFZp779J2370 OS=Homo sapiens GN=DKFZp779J2370 PE=2 SV=1 - [Q6MZR2_HUMAN] |
| Q8N9K3 | Putative uncharacterized protein FLJ37004 OS=Homo sapiens PE=2 SV=1 - [YA015_HUMAN]                        |
| Q6ZTK2 | Putative uncharacterized protein LOC400499 OS=Homo sapiens PE=2 SV=1 - [YP015_HUMAN]                       |
| Q53R32 | Putative uncharacterized protein RPIA (Fragment) OS=Homo sapiens GN=RPIA PE=2 SV=1 - [Q53R32_HUMAN]        |
| Q4ZG20 | Putative uncharacterized protein TTN OS=Homo sapiens GN=TTN PE=2 SV=1 - [Q4ZG20_HUMAN]                     |
| P30613 | Pyruvate kinase isozymes R/L OS=Homo sapiens GN=PKLR PE=1 SV=2 - [KPYR_HUMAN]                              |
| Q9Y4A3 | R33590_1 OS=Homo sapiens GN=CREB3L3 PE=2 SV=1 - [Q9Y4A3_HUMAN]                                             |
| P50395 | Rab GDP dissociation inhibitor beta OS=Homo sapiens GN=GDI2 PE=1 SV=2 - [GDIB_HUMAN]                       |
| Q8WVF3 | RAB28 protein OS=Homo sapiens GN=RAB28 PE=2 SV=1 - [Q8WVF3_HUMAN]                                          |
| Q9H2M9 | Rab3 GTPase-activating protein non-catalytic subunit OS=Homo sapiens GN=RAB3GAP2 PE=1 SV=1 - [RBGPR_HUMAN] |
| Q96NA2 | Rab-interacting lysosomal protein OS=Homo sapiens GN=RILP PE=1 SV=1 - [RILP_HUMAN]                         |
| C6K8I4 | Rab-like GTP-binding protein 1C OS=Homo sapiens GN=RBEL1 PE=2 SV=1 - [C6K8I4_HUMAN]                        |
| Q9H0H5 | Rac GTPase-activating protein 1 OS=Homo sapiens GN=RACGAP1 PE=1 SV=1 - [RGAP1_HUMAN]                       |
| P35241 | Radixin OS=Homo sapiens GN=RDX PE=1 SV=1 - [RADI_HUMAN]                                                    |
| Q9UHA4 | Ragulator complex protein LAMTOR3 OS=Homo sapiens GN=LAMTOR3 PE=1 SV=1 - [LTOR3_HUMAN]                     |
| Q96D71 | RalBP1-associated Eps domain-containing protein 1 OS=Homo sapiens GN=REPS1 PE=1 SV=3 - [REPS1_HUMAN]       |
| P46060 | Ran GTPase-activating protein 1 OS=Homo sapiens GN=RANGAP1 PE=1 SV=1 - [RAGP1_HUMAN]                       |
| P43487 | Ran-specific GTPase-activating protein OS=Homo sapiens GN=RANBP1 PE=1 SV=1 - [RANG_HUMAN]                  |
| P63000 | Ras-related C3 botulinum toxin substrate 1 OS=Homo sapiens GN=RAC1 PE=1 SV=1 - [RAC1_HUMAN]                |
| P61026 | Ras-related protein Rab-10 OS=Homo sapiens GN=RAB10 PE=1 SV=1 - [RAB10_HUMAN]                              |
| P62491 | Ras-related protein Rab-11A OS=Homo sapiens GN=RAB11A PE=1 SV=3 - [RB11A_HUMAN]                            |
| P51153 | Ras-related protein Rab-13 OS=Homo sapiens GN=RAB13 PE=1 SV=1 - [RAB13_HUMAN]                              |
| P61106 | Ras-related protein Rab-14 OS=Homo sapiens GN=RAB14 PE=1 SV=4 - [RAB14_HUMAN]                              |
| Q9NP72 | Ras-related protein Rab-18 OS=Homo sapiens GN=RAB18 PE=1 SV=1 - [RAB18_HUMAN]                              |
| P62820 | Ras-related protein Rab-1A OS=Homo sapiens GN=RAB1A PE=1 SV=3 - [RAB1A_HUMAN]                              |



|        |                                                                                                           |
|--------|-----------------------------------------------------------------------------------------------------------|
| Q9H0U4 | Ras-related protein Rab-1B OS=Homo sapiens GN=RAB1B PE=1 SV=1 - [RAB1B_HUMAN]                             |
| Q9UL25 | Ras-related protein Rab-21 OS=Homo sapiens GN=RAB21 PE=1 SV=3 - [RAB21_HUMAN]                             |
| Q9UL26 | Ras-related protein Rab-22A OS=Homo sapiens GN=RAB22A PE=1 SV=2 - [RB22A_HUMAN]                           |
| P61019 | Ras-related protein Rab-2A OS=Homo sapiens GN=RAB2A PE=1 SV=1 - [RAB2A_HUMAN]                             |
| Q9H082 | Ras-related protein Rab-33B OS=Homo sapiens GN=RAB33B PE=1 SV=1 - [RB33B_HUMAN]                           |
| Q15286 | Ras-related protein Rab-35 OS=Homo sapiens GN=RAB35 PE=1 SV=1 - [RAB35_HUMAN]                             |
| O95716 | Ras-related protein Rab-3D OS=Homo sapiens GN=RAB3D PE=1 SV=1 - [RAB3D_HUMAN]                             |
| Q8WXH6 | Ras-related protein Rab-40A OS=Homo sapiens GN=RAB40A PE=2 SV=2 - [RB40A_HUMAN]                           |
| P61020 | Ras-related protein Rab-5B OS=Homo sapiens GN=RAB5B PE=1 SV=1 - [RAB5B_HUMAN]                             |
| P51148 | Ras-related protein Rab-5C OS=Homo sapiens GN=RAB5C PE=1 SV=2 - [RAB5C_HUMAN]                             |
| P51149 | Ras-related protein Rab-7a OS=Homo sapiens GN=RAB7A PE=1 SV=1 - [RAB7A_HUMAN]                             |
| P61006 | Ras-related protein Rab-8A OS=Homo sapiens GN=RAB8A PE=1 SV=1 - [RAB8A_HUMAN]                             |
| Q92930 | Ras-related protein Rab-8B OS=Homo sapiens GN=RAB8B PE=1 SV=2 - [RAB8B_HUMAN]                             |
| P11233 | Ras-related protein Ral-A OS=Homo sapiens GN=RALA PE=1 SV=1 - [RALA_HUMAN]                                |
| P62834 | Ras-related protein Rap-1A OS=Homo sapiens GN=RAP1A PE=1 SV=1 - [RAP1A_HUMAN]                             |
| P10114 | Ras-related protein Rap-2a OS=Homo sapiens GN=RAP2A PE=1 SV=1 - [RAP2A_HUMAN]                             |
| P61225 | Ras-related protein Rap-2b OS=Homo sapiens GN=RAP2B PE=1 SV=1 - [RAP2B_HUMAN]                             |
| Q00765 | Receptor expression-enhancing protein 5 OS=Homo sapiens GN=REEP5 PE=1 SV=3 - [REEP5_HUMAN]                |
| Q96TC7 | Regulator of microtubule dynamics protein 3 OS=Homo sapiens GN=FAM82A2 PE=1 SV=2 - [RMD3_HUMAN]           |
| Q9BZ17 | Regulator of nonsense transcripts 3B OS=Homo sapiens GN=UPF3B PE=1 SV=1 - [REN3B_HUMAN]                   |
| Q9HB40 | Retinoid-inducible serine carboxypeptidase OS=Homo sapiens GN=SCPEP1 PE=1 SV=1 - [RISC_HUMAN]             |
| Q8TC12 | Retinol dehydrogenase 11 OS=Homo sapiens GN=RDH11 PE=1 SV=2 - [RDH11_HUMAN]                               |
| Q6ZS25 | Rho guanine nucleotide exchange factor 18 OS=Homo sapiens GN=ARHGEF18 PE=1 SV=3 - [ARHGI_HUMAN]           |
| Q13464 | Rho-associated protein kinase 1 OS=Homo sapiens GN=ROCK1 PE=1 SV=1 - [ROCK1_HUMAN]                        |
| O75116 | Rho-associated protein kinase 2 OS=Homo sapiens GN=ROCK2 PE=1 SV=4 - [ROCK2_HUMAN]                        |
| B4DFK3 | Rhomboid, veinlet-like 1 (Drosophila), isoform CRA_b OS=Homo sapiens GN=RHBDL1 PE=2 SV=1 - [B4DFK3_HUMAN] |
| P84095 | Rho-related GTP-binding protein RhoG OS=Homo sapiens GN=RHOG PE=1 SV=1 - [RHOG_HUMAN]                     |
| O75792 | Ribonuclease H2 subunit A OS=Homo sapiens GN=RNASEH2A PE=1 SV=2 - [RNH2A_HUMAN]                           |
| P60891 | Ribose-phosphate pyrophosphokinase 1 OS=Homo sapiens GN=PRPS1 PE=1 SV=2 - [PRPS1_HUMAN]                   |
| P11908 | Ribose-phosphate pyrophosphokinase 2 OS=Homo sapiens GN=PRPS2 PE=1 SV=2 - [PRPS2_HUMAN]                   |
| Q5VVC8 | Ribosomal protein L11 (Fragment) OS=Homo sapiens GN=RPL11 PE=2 SV=1 - [Q5VVC8_HUMAN]                      |
| E7EQV9 | Ribosomal protein L15 OS=Homo sapiens GN=RPL15 PE=3 SV=1 - [E7EQV9_HUMAN]                                 |
| B3KTM6 | Ribosomal protein L5, isoform CRA_b OS=Homo sapiens GN=RPL5 PE=2 SV=1 - [B3KTM6_HUMAN]                    |
| Q5JR95 | Ribosomal protein S8 OS=Homo sapiens GN=RPS8 PE=4 SV=1 - [Q5JR95_HUMAN]                                   |
| Q9Y3A4 | Ribosomal RNA-processing protein 7 homolog A OS=Homo sapiens GN=RRP7A PE=1 SV=2 - [RRP7A_HUMAN]           |
| Q9Y3A5 | Ribosome maturation protein SBDS OS=Homo sapiens GN=SBDS PE=1 SV=4 - [SBDS_HUMAN]                         |
| Q9P2E9 | Ribosome-binding protein 1 OS=Homo sapiens GN=RRBP1 PE=1 SV=4 - [RRBP1_HUMAN]                             |
| Q5EBL4 | RILP-like protein 1 OS=Homo sapiens GN=RILPL1 PE=1 SV=1 - [RIPL1_HUMAN]                                   |
| O00442 | RNA 3'-terminal phosphate cyclase OS=Homo sapiens GN=RTCD1 PE=1 SV=1 - [RTC1_HUMAN]                       |
| Q9HC36 | RNA methyltransferase-like protein 1 OS=Homo sapiens GN=RNMTL1 PE=1 SV=2 - [RMTL1_HUMAN]                  |
| Q92541 | RNA polymerase-associated protein RTF1 homolog OS=Homo sapiens GN=RTF1 PE=1 SV=4 - [RTF1_HUMAN]           |
| Q9NTZ6 | RNA-binding protein 12 OS=Homo sapiens GN=RBM12 PE=1 SV=1 - [RBM12_HUMAN]                                 |
| Q96PK6 | RNA-binding protein 14 OS=Homo sapiens GN=RBM14 PE=1 SV=2 - [RBM14_HUMAN]                                 |

|        |                                                                                                                                     |
|--------|-------------------------------------------------------------------------------------------------------------------------------------|
| Q3B7A4 | RPLP0 protein OS=Homo sapiens GN=RPLP0 PE=2 SV=1 - [Q3B7A4_HUMAN]                                                                   |
| Q7L7Q6 | RTN4 OS=Homo sapiens GN=RTN4 PE=2 SV=1 - [Q7L7Q6_HUMAN]                                                                             |
| Q96T51 | RUN and FYVE domain-containing protein 1 OS=Homo sapiens GN=RUFY1 PE=1 SV=2 - [RUFY1_HUMAN]                                         |
| Q96C34 | RUN domain-containing protein 1 OS=Homo sapiens GN=RUNDC1 PE=1 SV=3 - [RUND1_HUMAN]                                                 |
| Q9Y265 | RuvB-like 1 OS=Homo sapiens GN=RUVBL1 PE=1 SV=1 - [RUVB1_HUMAN]                                                                     |
| Q9Y230 | RuvB-like 2 OS=Homo sapiens GN=RUVBL2 PE=1 SV=3 - [RUVB2_HUMAN]                                                                     |
| P0C7P3 | Schlafen family member 14 OS=Homo sapiens GN=SLFN14 PE=2 SV=2 - [SLN14_HUMAN]                                                       |
| O95171 | Sciellin OS=Homo sapiens GN=SCEL PE=1 SV=2 - [SCEL_HUMAN]                                                                           |
| Q8WU76 | Sec1 family domain-containing protein 2 OS=Homo sapiens GN=SCFD2 PE=1 SV=2 - [SCFD2_HUMAN]                                          |
| B7ZL00 | SEC31A protein OS=Homo sapiens GN=SEC31A PE=2 SV=1 - [B7ZL00_HUMAN]                                                                 |
| Q969E2 | Secretory carrier-associated membrane protein 4 OS=Homo sapiens GN=SCAMP4 PE=2 SV=1 - [SCAM4_HUMAN]                                 |
| Q13228 | Selenium-binding protein 1 OS=Homo sapiens GN=SELENBP1 PE=1 SV=2 - [SBP1_HUMAN]                                                     |
| Q9H2E6 | Semaphorin-6A OS=Homo sapiens GN=SEMA6A PE=1 SV=2 - [SEM6A_HUMAN]                                                                   |
| O75326 | Semaphorin-7A OS=Homo sapiens GN=SEMA7A PE=1 SV=1 - [SEM7A_HUMAN]                                                                   |
| D6RGI3 | Septin 11, isoform CRA_b OS=Homo sapiens GN=SEPT11 PE=3 SV=1 - [D6RGI3_HUMAN]                                                       |
| A8MYA6 | Serine hydroxymethyltransferase OS=Homo sapiens GN=SHMT1 PE=3 SV=1 - [A8MYA6_HUMAN]                                                 |
| B7Z9F1 | Serine hydroxymethyltransferase OS=Homo sapiens GN=SHMT2 PE=2 SV=1 - [B7Z9F1_HUMAN]                                                 |
| O15270 | Serine palmitoyltransferase 2 OS=Homo sapiens GN=SPTLC2 PE=1 SV=1 - [SPTC2_HUMAN]                                                   |
| Q9Y5S2 | Serine/threonine-protein kinase MRCK beta OS=Homo sapiens GN=CDC42BPB PE=1 SV=2 - [MRCKB_HUMAN]                                     |
| O95747 | Serine/threonine-protein kinase OSR1 OS=Homo sapiens GN=OXSR1 PE=1 SV=1 - [OXSR1_HUMAN]                                             |
| Q9H2K8 | Serine/threonine-protein kinase TAO3 OS=Homo sapiens GN=TAOK3 PE=1 SV=2 - [TAOK3_HUMAN]                                             |
| Q13362 | Serine/threonine-protein phosphatase 2A 56 kDa regulatory subunit gamma isoform OS=Homo sapiens GN=PPP2R5C PE=1 SV=3 - [2A5G_HUMAN] |
| P67775 | Serine/threonine-protein phosphatase 2A catalytic subunit alpha isoform OS=Homo sapiens GN=PPP2CA PE=1 SV=1 - [PP2AA_HUMAN]         |
| P48454 | Serine/threonine-protein phosphatase 2B catalytic subunit gamma isoform OS=Homo sapiens GN=PPP3CC PE=1 SV=3 - [PP2BC_HUMAN]         |
| Q9UPN7 | Serine/threonine-protein phosphatase 6 regulatory subunit 1 OS=Homo sapiens GN=PPP6R1 PE=1 SV=5 - [PP6R1_HUMAN]                     |
| E9PMD7 | Serine/threonine-protein phosphatase OS=Homo sapiens GN=PPP1CA PE=3 SV=1 - [E9PMD7_HUMAN]                                           |
| B4DDZ8 | Serine/threonine-protein phosphatase OS=Homo sapiens GN=PPP5C PE=2 SV=1 - [B4DDZ8_HUMAN]                                            |
| Q96HS1 | Serine/threonine-protein phosphatase PGAM5, mitochondrial OS=Homo sapiens GN=PGAM5 PE=1 SV=2 - [PGAM5_HUMAN]                        |
| P02787 | Serotransferrin OS=Homo sapiens GN=TF PE=1 SV=3 - [TRFE_HUMAN]                                                                      |
| P02768 | Serum albumin OS=Homo sapiens GN=ALB PE=1 SV=2 - [ALBU_HUMAN]                                                                       |
| P49591 | Seryl-tRNA synthetase, cytoplasmic OS=Homo sapiens GN=SARS PE=1 SV=3 - [SYSC_HUMAN]                                                 |
| Q8N228 | Sex comb on midleg-like protein 4 OS=Homo sapiens GN=SCML4 PE=2 SV=2 - [SCML4_HUMAN]                                                |
| Q5TIH2 | SFT2 domain containing 2 OS=Homo sapiens GN=SFT2D2 PE=2 SV=1 - [Q5TIH2_HUMAN]                                                       |
| Q5T123 | SH3 domain binding glutamic acid-rich protein like 3 OS=Homo sapiens GN=SH3BGRL3 PE=2 SV=1 - [Q5T123_HUMAN]                         |
| Q9UJC5 | SH3 domain-binding glutamic acid-rich-like protein 2 OS=Homo sapiens GN=SH3BGRL2 PE=1 SV=2 - [SH3L2_HUMAN]                          |
| O75368 | SH3 domain-binding glutamic acid-rich-like protein OS=Homo sapiens GN=SH3BGRL PE=1 SV=1 - [SH3L1_HUMAN]                             |
| Q9BZZ2 | Sialoadhesin OS=Homo sapiens GN=SIGLEC1 PE=1 SV=2 - [SN_HUMAN]                                                                      |
| Q9H9B4 | Sideroflexin-1 OS=Homo sapiens GN=SFXN1 PE=1 SV=4 - [SFXN1_HUMAN]                                                                   |
| P61009 | Signal peptidase complex subunit 3 OS=Homo sapiens GN=SPCS3 PE=1 SV=1 - [SPCS3_HUMAN]                                               |
| P37108 | Signal recognition particle 14 kDa protein OS=Homo sapiens GN=SRP14 PE=1 SV=2 - [SRP14_HUMAN]                                       |
| O76094 | Signal recognition particle 72 kDa protein OS=Homo sapiens GN=SRP72 PE=1 SV=3 - [SRP72_HUMAN]                                       |
| P49458 | Signal recognition particle 9 kDa protein OS=Homo sapiens GN=SRP9 PE=1 SV=2 - [SRP09_HUMAN]                                         |
| Q9Y5M8 | Signal recognition particle receptor subunit beta OS=Homo sapiens GN=SRPRB PE=1 SV=3 - [SRPRB_HUMAN]                                |

|        |                                                                                                                           |
|--------|---------------------------------------------------------------------------------------------------------------------------|
| P40763 | Signal transducer and activator of transcription 3 OS=Homo sapiens GN=STAT3 PE=1 SV=2 - [STAT3_HUMAN]                     |
| O00241 | Signal-regulatory protein beta-1 OS=Homo sapiens GN=SIRPB1 PE=1 SV=5 - [SIRB1_HUMAN]                                      |
| Q8N3X5 | Similar to ATPase, Ca++ transporting, cardiac muscle, fast twitch 1 (Fragment) OS=Homo sapiens PE=2 SV=1 - [Q8N3X5_HUMAN] |
| A7XYQ1 | Sine oculis-binding protein homolog OS=Homo sapiens GN=SOBP PE=2 SV=2 - [SOBP_HUMAN]                                      |
| Q14190 | Single-minded homolog 2 OS=Homo sapiens GN=SIM2 PE=1 SV=2 - [SIM2_HUMAN]                                                  |
| Q96G53 | SLC27A4 protein OS=Homo sapiens GN=SLC27A4 PE=2 SV=1 - [Q96G53_HUMAN]                                                     |
| O43295 | SLIT-ROBO Rho GTPase-activating protein 3 OS=Homo sapiens GN=SRGAP3 PE=1 SV=3 - [SRGP2_HUMAN]                             |
| Q8NHG7 | Small VCP/p97-interacting protein OS=Homo sapiens GN=SVIP PE=2 SV=1 - [SVIP_HUMAN]                                        |
| C0H5W9 | SNX6 protein OS=Homo sapiens GN=SNX6 PE=2 SV=1 - [C0H5W9_HUMAN]                                                           |
| Q9UQD0 | Sodium channel protein type 8 subunit alpha OS=Homo sapiens GN=SCN8A PE=1 SV=1 - [SCN8A_HUMAN]                            |
| P14415 | Sodium/potassium-transporting ATPase subunit beta-2 OS=Homo sapiens GN=ATP1B2 PE=1 SV=3 - [AT1B2_HUMAN]                   |
| P54709 | Sodium/potassium-transporting ATPase subunit beta-3 OS=Homo sapiens GN=ATP1B3 PE=1 SV=1 - [AT1B3_HUMAN]                   |
| B5A923 | Soluble VEGFR1 variant 21 OS=Homo sapiens GN=VEGFR1 PE=2 SV=1 - [B5A923_HUMAN]                                            |
| P11166 | Solute carrier family 2, facilitated glucose transporter member 1 OS=Homo sapiens GN=SLC2A1 PE=1 SV=2 - [GTR1_HUMAN]      |
| Q8TD20 | Solute carrier family 2, facilitated glucose transporter member 12 OS=Homo sapiens GN=SLC2A12 PE=2 SV=1 - [GTR12_HUMAN]   |
| P14672 | Solute carrier family 2, facilitated glucose transporter member 4 OS=Homo sapiens GN=SLC2A4 PE=1 SV=1 - [GTR4_HUMAN]      |
| Q5VTS8 | Solute carrier family 25, member 27 (Fragment) OS=Homo sapiens GN=SLC25A27 PE=2 SV=1 - [Q5VTS8_HUMAN]                     |
| Q9NP59 | Solute carrier family 40 member 1 OS=Homo sapiens GN=SLC40A1 PE=1 SV=1 - [S40A1_HUMAN]                                    |
| Q9BX66 | Sorbin and SH3 domain-containing protein 1 OS=Homo sapiens GN=SORBS1 PE=1 SV=3 - [SRBS1_HUMAN]                            |
| Q00796 | Sorbitol dehydrogenase OS=Homo sapiens GN=SORD PE=1 SV=4 - [DHSO_HUMAN]                                                   |
| Q9Y512 | Sorting and assembly machinery component 50 homolog OS=Homo sapiens GN=SAMM50 PE=1 SV=3 - [SAM50_HUMAN]                   |
| P02549 | Spectrin alpha chain, erythrocyte OS=Homo sapiens GN=SPTA1 PE=1 SV=5 - [SPTA1_HUMAN]                                      |
| P11277 | Spectrin beta chain, erythrocyte OS=Homo sapiens GN=SPTB PE=1 SV=5 - [SPTB1_HUMAN]                                        |
| Q5MJ07 | Sperm protein associated with the nucleus on the X chromosome N5 OS=Homo sapiens GN=SPANXN5 PE=2 SV=1 - [SPXN5_HUMAN]     |
| B3KUY1 | Splicing factor, arginine/serine-rich 2, isoform CRA_d OS=Homo sapiens GN=SFRS2 PE=2 SV=1 - [B3KUY1_HUMAN]                |
| B4E241 | Splicing factor, arginine/serine-rich 3, isoform CRA_a OS=Homo sapiens GN=SRSF3 PE=2 SV=1 - [B4E241_HUMAN]                |
| P23246 | Splicing factor, proline- and glutamine-rich OS=Homo sapiens GN=SFPQ PE=1 SV=2 - [SFPQ_HUMAN]                             |
| Q9H2G2 | STE20-like serine/threonine-protein kinase OS=Homo sapiens GN=SLK PE=1 SV=1 - [SLK_HUMAN]                                 |
| Q9C0K7 | STE20-related kinase adapter protein beta OS=Homo sapiens GN=STRADB PE=1 SV=1 - [STRAB_HUMAN]                             |
| P31948 | Stress-induced-phosphoprotein 1 OS=Homo sapiens GN=STIP1 PE=1 SV=1 - [STIP1_HUMAN]                                        |
| O95347 | Structural maintenance of chromosomes protein 2 OS=Homo sapiens GN=SMC2 PE=1 SV=2 - [SMC2_HUMAN]                          |
| P21912 | Succinate dehydrogenase [ubiquinone] iron-sulfur subunit, mitochondrial OS=Homo sapiens GN=SDHB PE=1 SV=3 - [DHSB_HUMAN]  |
| P53597 | Succinyl-CoA ligase [GDP-forming] subunit alpha, mitochondrial OS=Homo sapiens GN=SUCLG1 PE=1 SV=4 - [SUCA_HUMAN]         |
| Q96199 | Succinyl-CoA ligase [GDP-forming] subunit beta, mitochondrial OS=Homo sapiens GN=SUCLG2 PE=1 SV=2 - [SUCB2_HUMAN]         |
| P55809 | Succinyl-CoA:3-ketoacid-coenzyme A transferase 1, mitochondrial OS=Homo sapiens GN=OXCT1 PE=1 SV=1 - [SCOT1_HUMAN]        |
| Q9Y6N5 | Sulfide:quinone oxidoreductase, mitochondrial OS=Homo sapiens GN=SQRDL PE=1 SV=1 - [SQRD_HUMAN]                           |
| P63279 | SUMO-conjugating enzyme UBC9 OS=Homo sapiens GN=UBE2I PE=1 SV=1 - [UBC9_HUMAN]                                            |
| P00441 | Superoxide dismutase [Cu-Zn] OS=Homo sapiens GN=SOD1 PE=1 SV=2 - [SODC_HUMAN]                                             |
| O60284 | Suppression of tumorigenicity 18 protein OS=Homo sapiens GN=ST18 PE=1 SV=1 - [ST18_HUMAN]                                 |
| Q99536 | Synaptic vesicle membrane protein VAT-1 homolog OS=Homo sapiens GN=VAT1 PE=1 SV=2 - [VAT1_HUMAN]                          |
| O00161 | Synaptosomal-associated protein 23 OS=Homo sapiens GN=SNAP23 PE=1 SV=1 - [SNP23_HUMAN]                                    |
| Q96C24 | Synaptotagmin-like protein 4 OS=Homo sapiens GN=SYTL4 PE=1 SV=2 - [SYTL4_HUMAN]                                           |
| B1AJQ6 | Syntaxin 12 (Fragment) OS=Homo sapiens GN=STX12 PE=4 SV=1 - [B1AJQ6_HUMAN]                                                |

|         |                                                                                                                                               |
|---------|-----------------------------------------------------------------------------------------------------------------------------------------------|
| A8MX0   | Syntaxin 4A (Placental), isoform CRA_c OS=Homo sapiens GN=STX4 PE=2 SV=1 - [A8MX0_HUMAN]                                                      |
| B4DKR0  | Syntaxin 5A, isoform CRA_c OS=Homo sapiens GN=STX5 PE=2 SV=1 - [B4DKR0_HUMAN]                                                                 |
| O43752  | Syntaxin-6 OS=Homo sapiens GN=STX6 PE=1 SV=1 - [STX6_HUMAN]                                                                                   |
| O15400  | Syntaxin-7 OS=Homo sapiens GN=STX7 PE=1 SV=4 - [STX7_HUMAN]                                                                                   |
| Q9UNK0  | Syntaxin-8 OS=Homo sapiens GN=STX8 PE=1 SV=2 - [STX8_HUMAN]                                                                                   |
| O00186  | Syntaxin-binding protein 3 OS=Homo sapiens GN=STXBP3 PE=1 SV=2 - [STXB3_HUMAN]                                                                |
| Q5T5C0  | Syntaxin-binding protein 5 OS=Homo sapiens GN=STXBP5 PE=1 SV=1 - [STXB5_HUMAN]                                                                |
| Q5TCU6  | Talin 1 OS=Homo sapiens GN=TLN1 PE=2 SV=1 - [Q5TCU6_HUMAN]                                                                                    |
| Q9Y4G6  | Talin-2 OS=Homo sapiens GN=TLN2 PE=1 SV=4 - [TLN2_HUMAN]                                                                                      |
| B1AKP7  | TAR DNA binding protein OS=Homo sapiens GN=TARDBP PE=4 SV=1 - [B1AKP7_HUMAN]                                                                  |
| Q9ULP9  | TBC1 domain family member 24 OS=Homo sapiens GN=TBC1D24 PE=1 SV=2 - [TBC24_HUMAN]                                                             |
| O95759  | TBC1 domain family member 8 OS=Homo sapiens GN=TBC1D8 PE=1 SV=3 - [TBCD8_HUMAN]                                                               |
| P17987  | T-complex protein 1 subunit alpha OS=Homo sapiens GN=TCP1 PE=1 SV=1 - [TCPA_HUMAN]                                                            |
| P50991  | T-complex protein 1 subunit delta OS=Homo sapiens GN=CCT4 PE=1 SV=4 - [TCPD_HUMAN]                                                            |
| P48643  | T-complex protein 1 subunit epsilon OS=Homo sapiens GN=CCT5 PE=1 SV=1 - [TCPE_HUMAN]                                                          |
| P50990  | T-complex protein 1 subunit theta OS=Homo sapiens GN=CCT8 PE=1 SV=4 - [TCPQ_HUMAN]                                                            |
| P40227  | T-complex protein 1 subunit zeta OS=Homo sapiens GN=CCT6A PE=1 SV=3 - [TCPZ_HUMAN]                                                            |
| Q92526  | T-complex protein 1 subunit zeta-2 OS=Homo sapiens GN=CCT6B PE=1 SV=5 - [TCPW_HUMAN]                                                          |
| Q9NYB0  | Telomeric repeat-binding factor 2-interacting protein 1 OS=Homo sapiens GN=TERF2IP PE=1 SV=1 - [TE2IP_HUMAN]                                  |
| Q59G71  | Tensin variant (Fragment) OS=Homo sapiens PE=2 SV=1 - [Q59G71_HUMAN]                                                                          |
| Q9BXA7  | Testis-specific serine/threonine-protein kinase 1 OS=Homo sapiens GN=TSSK1B PE=1 SV=1 - [TSSK1_HUMAN]                                         |
| B1ALW1  | Thioredoxin OS=Homo sapiens GN=TXN PE=4 SV=1 - [B1ALW1_HUMAN]                                                                                 |
| O43396  | Thioredoxin-like protein 1 OS=Homo sapiens GN=TXNL1 PE=1 SV=3 - [TXNL1_HUMAN]                                                                 |
| Q9H3N1  | Thioredoxin-related transmembrane protein 1 OS=Homo sapiens GN=TMX1 PE=1 SV=1 - [TMX1_HUMAN]                                                  |
| P26639  | Threonyl-tRNA synthetase, cytoplasmic OS=Homo sapiens GN=TARS PE=1 SV=3 - [SYTC_HUMAN]                                                        |
| P23919  | Thymidylate kinase OS=Homo sapiens GN=DTYMK PE=1 SV=4 - [KTHY_HUMAN]                                                                          |
| Q9Y2W1  | Thyroid hormone receptor-associated protein 3 OS=Homo sapiens GN=THRAP3 PE=1 SV=2 - [TR150_HUMAN]                                             |
| Q17RP2  | Tigger transposable element-derived protein 6 OS=Homo sapiens GN=TIGD6 PE=2 SV=2 - [TIGD6_HUMAN]                                              |
| Q8WZ42  | Titin OS=Homo sapiens GN=TTN PE=1 SV=2 - [TITIN_HUMAN]                                                                                        |
| Q7Z649  | TMEM9 domain family, member B, isoform CRA_b OS=Homo sapiens GN=TMEM9B PE=2 SV=1 - [Q7Z649_HUMAN]                                             |
| Q8NFAQ8 | Torsin-1A-interacting protein 2 OS=Homo sapiens GN=TOR1AIP2 PE=1 SV=1 - [TOIP2_HUMAN]                                                         |
| O14804  | Trace amine-associated receptor 5 OS=Homo sapiens GN=TAAR5 PE=2 SV=2 - [TAAR5_HUMAN]                                                          |
| O75865  | Trafficking protein particle complex subunit 6A OS=Homo sapiens GN=TRAPPC6A PE=1 SV=2 - [TPC6A_HUMAN]                                         |
| Q9NZ01  | Trans-2,3-enoyl-CoA reductase OS=Homo sapiens GN=TECR PE=1 SV=1 - [TECR_HUMAN]                                                                |
| Q9BV79  | Trans-2-enoyl-CoA reductase, mitochondrial OS=Homo sapiens GN=MECR PE=1 SV=2 - [MECR_HUMAN]                                                   |
| P37837  | Transaldolase OS=Homo sapiens GN=TALDO1 PE=1 SV=2 - [TALDO_HUMAN]                                                                             |
| P23193  | Transcription elongation factor A protein 1 OS=Homo sapiens GN=TCEA1 PE=1 SV=2 - [TCEA1_HUMAN]                                                |
| B8ZZU8  | Transcription elongation factor B (SIII), polypeptide 2 (18kDa, elongin B), isoform CRA_b OS=Homo sapiens GN=TCEB2 PE=4 SV=1 - [B8ZZU8_HUMAN] |
| Q7KZ85  | Transcription elongation factor SPT6 OS=Homo sapiens GN=SUPT6H PE=1 SV=2 - [SPT6H_HUMAN]                                                      |
| O14776  | Transcription elongation regulator 1 OS=Homo sapiens GN=TCERG1 PE=1 SV=2 - [TCRG1_HUMAN]                                                      |
| Q9UGU0  | Transcription factor 20 OS=Homo sapiens GN=TCF20 PE=1 SV=3 - [TCF20_HUMAN]                                                                    |
| Q00059  | Transcription factor A, mitochondrial OS=Homo sapiens GN=TFAM PE=1 SV=1 - [TFAM_HUMAN]                                                        |
| Q6VUC0  | Transcription factor AP-2-epsilon OS=Homo sapiens GN=TFAP2E PE=2 SV=1 - [AP2E_HUMAN]                                                          |

|        |                                                                                                                    |
|--------|--------------------------------------------------------------------------------------------------------------------|
| A0AVK6 | Transcription factor E2F8 OS=Homo sapiens GN=E2F8 PE=1 SV=1 - [E2F8_HUMAN]                                         |
| Q00577 | Transcriptional activator protein Pur-alpha OS=Homo sapiens GN=PURA PE=1 SV=2 - [PURA_HUMAN]                       |
| Q96QR8 | Transcriptional activator protein Pur-beta OS=Homo sapiens GN=PURB PE=1 SV=3 - [PURB_HUMAN]                        |
| P02786 | Transferrin receptor protein 1 OS=Homo sapiens GN=TFRC PE=1 SV=2 - [TFR1_HUMAN]                                    |
| B9ZVW9 | Transforming growth factor, beta-induced, 68kDa, isoform CRA_a OS=Homo sapiens GN=TGFBI PE=4 SV=1 - [B9ZVW9_HUMAN] |
| P61586 | Transforming protein RhoA OS=Homo sapiens GN=RHOA PE=1 SV=1 - [RHOA_HUMAN]                                         |
| P55072 | Transitional endoplasmic reticulum ATPase OS=Homo sapiens GN=VCP PE=1 SV=4 - [TERA_HUMAN]                          |
| P49770 | Translation initiation factor eIF-2B subunit beta OS=Homo sapiens GN=EIF2B2 PE=1 SV=3 - [EI2BB_HUMAN]              |
| Q9UI10 | Translation initiation factor eIF-2B subunit delta OS=Homo sapiens GN=EIF2B4 PE=1 SV=2 - [EI2BD_HUMAN]             |
| Q92616 | Translational activator GCN1 OS=Homo sapiens GN=GCN1L1 PE=1 SV=6 - [GCN1L_HUMAN]                                   |
| Q99598 | Translin-associated protein X OS=Homo sapiens GN=TSNAX PE=1 SV=1 - [TSNAX_HUMAN]                                   |
| Q99442 | Translocation protein SEC62 OS=Homo sapiens GN=SEC62 PE=1 SV=1 - [SEC62_HUMAN]                                     |
| B1AH87 | Translocator protein (18kDa) (Fragment) OS=Homo sapiens GN=TSPO PE=4 SV=1 - [B1AH87_HUMAN]                         |
| Q9HD45 | Transmembrane 9 superfamily member 3 OS=Homo sapiens GN=TM9SF3 PE=1 SV=2 - [TM9S3_HUMAN]                           |
| B7Z1P7 | Transmembrane and coiled-coil domain family 2, isoform CRA_d OS=Homo sapiens GN=TMCC2 PE=2 SV=1 - [B7Z1P7_HUMAN]   |
| Q13445 | Transmembrane emp24 domain-containing protein 1 OS=Homo sapiens GN=TMED1 PE=1 SV=1 - [TMED1_HUMAN]                 |
| P49755 | Transmembrane emp24 domain-containing protein 10 OS=Homo sapiens GN=TMED10 PE=1 SV=2 - [TMEDA_HUMAN]               |
| Q9BVK6 | Transmembrane emp24 domain-containing protein 9 OS=Homo sapiens GN=TMED9 PE=1 SV=2 - [TMED9_HUMAN]                 |
| Q9NUM4 | Transmembrane protein 106B OS=Homo sapiens GN=TMEM106B PE=1 SV=2 - [T106B_HUMAN]                                   |
| Q9BVC6 | Transmembrane protein 109 OS=Homo sapiens GN=TMEM109 PE=1 SV=1 - [TM109_HUMAN]                                     |
| Q7Z7N9 | Transmembrane protein 179B OS=Homo sapiens GN=TMEM179B PE=1 SV=1 - [T179B_HUMAN]                                   |
| Q6UW68 | Transmembrane protein 205 OS=Homo sapiens GN=TMEM205 PE=1 SV=1 - [TM205_HUMAN]                                     |
| Q5T3F8 | Transmembrane protein 63B OS=Homo sapiens GN=TMEM63B PE=1 SV=1 - [TM63B_HUMAN]                                     |
| Q96KR6 | Transmembrane protein C20orf108 OS=Homo sapiens GN=C20orf108 PE=1 SV=2 - [CT108_HUMAN]                             |
| Q6IN77 | Transportin 2 OS=Homo sapiens GN=TNPO2 PE=2 SV=1 - [Q6IN77_HUMAN]                                                  |
| Q92973 | Transportin-1 OS=Homo sapiens GN=TNPO1 PE=1 SV=2 - [TNPO1_HUMAN]                                                   |
| P53007 | Tricarboxylate transport protein, mitochondrial OS=Homo sapiens GN=SLC25A1 PE=1 SV=2 - [TXTP_HUMAN]                |
| P40939 | Trifunctional enzyme subunit alpha, mitochondrial OS=Homo sapiens GN=HADHA PE=1 SV=2 - [ECHA_HUMAN]                |
| P55084 | Trifunctional enzyme subunit beta, mitochondrial OS=Homo sapiens GN=HADHB PE=1 SV=3 - [ECHB_HUMAN]                 |
| P60174 | Triosephosphate isomerase OS=Homo sapiens GN=TPI1 PE=1 SV=2 - [TPI1_HUMAN]                                         |
| Q5SRJ5 | Tripartite motif-containing 10 OS=Homo sapiens GN=TRIM10 PE=2 SV=1 - [Q5SRJ5_HUMAN]                                |
| Q8NG06 | Tripartite motif-containing protein 58 OS=Homo sapiens GN=TRIM58 PE=2 SV=2 - [TRI58_HUMAN]                         |
| P29144 | Tripeptidyl-peptidase 2 OS=Homo sapiens GN=TPP2 PE=1 SV=4 - [TPP2_HUMAN]                                           |
| Q5JR82 | Tropomodulin 4 (Muscle) (Fragment) OS=Homo sapiens GN=TMOD4 PE=2 SV=1 - [Q5JR82_HUMAN]                             |
| P28289 | Tropomodulin-1 OS=Homo sapiens GN=TMOD1 PE=1 SV=1 - [TMOD1_HUMAN]                                                  |
| D9YZV5 | Tropomyosin 1 (Alpha) isoform 4 OS=Homo sapiens GN=TPM1 PE=3 SV=1 - [D9YZV5_HUMAN]                                 |
| D9YZV7 | Tropomyosin 1 (Alpha) isoform 6 OS=Homo sapiens GN=TPM1 PE=3 SV=1 - [D9YZV7_HUMAN]                                 |
| Q5VU58 | Tropomyosin 3 OS=Homo sapiens GN=TPM3 PE=2 SV=1 - [Q5VU58_HUMAN]                                                   |
| Q5VU59 | Tropomyosin 3 OS=Homo sapiens GN=TPM3 PE=2 SV=1 - [Q5VU59_HUMAN]                                                   |
| Q5VU61 | Tropomyosin 3 OS=Homo sapiens GN=TPM3 PE=2 SV=1 - [Q5VU61_HUMAN]                                                   |
| Q5VU66 | Tropomyosin 3 OS=Homo sapiens GN=TPM3 PE=2 SV=1 - [Q5VU66_HUMAN]                                                   |
| P09493 | Tropomyosin alpha-1 chain OS=Homo sapiens GN=TPM1 PE=1 SV=2 - [TPM1_HUMAN]                                         |
| P06753 | Tropomyosin alpha-3 chain OS=Homo sapiens GN=TPM3 PE=1 SV=1 - [TPM3_HUMAN]                                         |

|        |                                                                                                                                  |
|--------|----------------------------------------------------------------------------------------------------------------------------------|
| Q5LJ98 | TROVE domain family, member 2 OS=Homo sapiens GN=TROVE2 PE=2 SV=1 - [Q5LJ98_HUMAN]                                               |
| P48775 | Tryptophan 2,3-dioxygenase OS=Homo sapiens GN=TDO2 PE=1 SV=1 - [T23O_HUMAN]                                                      |
| P23381 | Tryptophanyl-tRNA synthetase, cytoplasmic OS=Homo sapiens GN=WARS PE=1 SV=2 - [SYWC_HUMAN]                                       |
| Q9Y3Q8 | TSC22 domain family protein 4 OS=Homo sapiens GN=TSC22D4 PE=1 SV=2 - [T22D4_HUMAN]                                               |
| Q9BQE3 | Tubulin alpha-1C chain OS=Homo sapiens GN=TUBA1C PE=1 SV=1 - [TBA1C_HUMAN]                                                       |
| P07437 | Tubulin beta chain OS=Homo sapiens GN=TUBB PE=1 SV=2 - [TBB5_HUMAN]                                                              |
| P68371 | Tubulin beta-2C chain OS=Homo sapiens GN=TUBB2C PE=1 SV=1 - [TBB2C_HUMAN]                                                        |
| B1AH89 | Tubulin tyrosine ligase-like family, member 12 OS=Homo sapiens GN=TTLL12 PE=4 SV=1 - [B1AH89_HUMAN]                              |
| A8MUB1 | Tubulin, alpha 1 (Testis specific), isoform CRA_a OS=Homo sapiens GN=TUBA4A PE=2 SV=1 - [A8MUB1_HUMAN]                           |
| Q8NHU6 | Tudor domain-containing protein 7 OS=Homo sapiens GN=TDRD7 PE=1 SV=2 - [TDRD7_HUMAN]                                             |
| Q6UWW7 | TUFT1 OS=Homo sapiens GN=TUFT1 PE=2 SV=1 - [Q6UWW7_HUMAN]                                                                        |
| P25445 | Tumor necrosis factor receptor superfamily member 6 OS=Homo sapiens GN=FAS PE=1 SV=1 - [TNR6_HUMAN]                              |
| Q6RW13 | Type-1 angiotensin II receptor-associated protein OS=Homo sapiens GN=AGTRAP PE=1 SV=1 - [ATRAP_HUMAN]                            |
| Q9UIG0 | Tyrosine-protein kinase BAZ1B OS=Homo sapiens GN=BAZ1B PE=1 SV=2 - [BAZ1B_HUMAN]                                                 |
| Q06124 | Tyrosine-protein phosphatase non-receptor type 11 OS=Homo sapiens GN=PTPN11 PE=1 SV=2 - [PTN11_HUMAN]                            |
| P54577 | Tyrosyl-tRNA synthetase, cytoplasmic OS=Homo sapiens GN=YARS PE=1 SV=4 - [SYYC_HUMAN]                                            |
| O43290 | U4/U6.U5 tri-snRNP-associated protein 1 OS=Homo sapiens GN=SART1 PE=1 SV=1 - [SNUT1_HUMAN]                                       |
| Q9Y333 | U6 snRNA-associated Sm-like protein LSM2 OS=Homo sapiens GN=LSM2 PE=1 SV=1 - [LSM2_HUMAN]                                        |
| Q9Y4Z0 | U6 snRNA-associated Sm-like protein LSM4 OS=Homo sapiens GN=LSM4 PE=1 SV=1 - [LSM4_HUMAN]                                        |
| Q70EL4 | Ubiquitin carboxyl-terminal hydrolase 43 OS=Homo sapiens GN=USP43 PE=1 SV=2 - [UBP43_HUMAN]                                      |
| P45974 | Ubiquitin carboxyl-terminal hydrolase 5 OS=Homo sapiens GN=USP5 PE=1 SV=2 - [UBP5_HUMAN]                                         |
| A6NJA2 | Ubiquitin carboxyl-terminal hydrolase OS=Homo sapiens GN=USP14 PE=3 SV=1 - [A6NJA2_HUMAN]                                        |
| E9PCQ3 | Ubiquitin carboxyl-terminal hydrolase OS=Homo sapiens GN=USP15 PE=3 SV=2 - [E9PCQ3_HUMAN]                                        |
| B7WPF4 | Ubiquitin carboxyl-terminal hydrolase OS=Homo sapiens GN=USP24 PE=3 SV=2 - [B7WPF4_HUMAN]                                        |
| D6RAW0 | Ubiquitin carrier protein OS=Homo sapiens GN=UBE2D3 PE=3 SV=1 - [D6RAW0_HUMAN]                                                   |
| Q9BSL1 | Ubiquitin-associated domain-containing protein 1 OS=Homo sapiens GN=UBAC1 PE=1 SV=1 - [UBAC1_HUMAN]                              |
| P61088 | Ubiquitin-conjugating enzyme E2 N OS=Homo sapiens GN=UBE2N PE=1 SV=1 - [UBE2N_HUMAN]                                             |
| Q9C0C9 | Ubiquitin-conjugating enzyme E2 O OS=Homo sapiens GN=UBE2O PE=1 SV=3 - [UBE2O_HUMAN]                                             |
| Q8WVY7 | Ubiquitin-like domain-containing CTD phosphatase 1 OS=Homo sapiens GN=UBLCP1 PE=1 SV=2 - [UBCP1_HUMAN]                           |
| P22314 | Ubiquitin-like modifier-activating enzyme 1 OS=Homo sapiens GN=UBA1 PE=1 SV=3 - [UBA1_HUMAN]                                     |
| A0AVT1 | Ubiquitin-like modifier-activating enzyme 6 OS=Homo sapiens GN=UBA6 PE=1 SV=1 - [UBA6_HUMAN]                                     |
| P11441 | Ubiquitin-like protein 4A OS=Homo sapiens GN=UBL4A PE=1 SV=1 - [UBL4A_HUMAN]                                                     |
| Q9NYU2 | UDP-glucose:glycoprotein glucosyltransferase 1 OS=Homo sapiens GN=UGGT1 PE=1 SV=3 - [UGGG1_HUMAN]                                |
| Q9NTN3 | UDP-glucuronic acid/UDP-N-acetylgalactosamine transporter OS=Homo sapiens GN=SLC35D1 PE=1 SV=1 - [S35D1_HUMAN]                   |
| O15294 | UDP-N-acetylglucosamine--peptide N-acetylglucosaminyltransferase 110 kDa subunit OS=Homo sapiens GN=OGT PE=1 SV=3 - [OGT1_HUMAN] |
| A8K6F7 | Unc-45 homolog A (C. elegans), isoform CRA_a OS=Homo sapiens GN=UNC45A PE=2 SV=1 - [A8K6F7_HUMAN]                                |
| B0QY64 | Unc-84 homolog B (C. elegans) (Fragment) OS=Homo sapiens GN=UNC84B PE=4 SV=1 - [B0QY64_HUMAN]                                    |
| B4DGL8 | Uncharacterized protein (Fragment) OS=Homo sapiens GN=ABCB7 PE=2 SV=1 - [B4DGL8_HUMAN]                                           |
| Q5T446 | Uncharacterized protein (Fragment) OS=Homo sapiens GN=UROD PE=2 SV=1 - [Q5T446_HUMAN]                                            |
| Q5SY21 | Uncharacterized protein (Fragment) OS=Homo sapiens GN=ZBTB48 PE=2 SV=1 - [Q5SY21_HUMAN]                                          |
| Q96GS4 | Uncharacterized protein C17orf59 OS=Homo sapiens GN=C17orf59 PE=1 SV=2 - [CQ059_HUMAN]                                           |
| Q86X18 | Uncharacterized protein C19orf68 OS=Homo sapiens GN=C19orf68 PE=1 SV=2 - [CS068_HUMAN]                                           |
| A0AUZ9 | Uncharacterized protein C2orf67 OS=Homo sapiens GN=C2orf67 PE=1 SV=2 - [CB067_HUMAN]                                             |

|        |                                                                                        |
|--------|----------------------------------------------------------------------------------------|
| Q9BZA4 | Uncharacterized protein CYorf15B OS=Homo sapiens GN=CYorf15B PE=1 SV=1 - [CY15B_HUMAN] |
| Q9UF83 | Uncharacterized protein DKFZp434B061 OS=Homo sapiens PE=2 SV=2 - [YM012_HUMAN]         |
| Q9Y2F5 | Uncharacterized protein KIAA0947 OS=Homo sapiens GN=KIAA0947 PE=1 SV=5 - [K0947_HUMAN] |
| B2RUZ4 | Uncharacterized protein LOC388588 OS=Homo sapiens PE=1 SV=1 - [YA047_HUMAN]            |
| F5GXL7 | Uncharacterized protein OS=Homo sapiens GN=ABCC1 PE=3 SV=1 - [F5GXL7_HUMAN]            |
| E9PBW0 | Uncharacterized protein OS=Homo sapiens GN=ABCC5 PE=3 SV=1 - [E9PBW0_HUMAN]            |
| F5GYC1 | Uncharacterized protein OS=Homo sapiens GN=ABCD3 PE=3 SV=1 - [F5GYC1_HUMAN]            |
| C9IZX5 | Uncharacterized protein OS=Homo sapiens GN=ABHD10 PE=4 SV=1 - [C9IZX5_HUMAN]           |
| B7Z9I1 | Uncharacterized protein OS=Homo sapiens GN=ACADM PE=2 SV=1 - [B7Z9I1_HUMAN]            |
| E9PE82 | Uncharacterized protein OS=Homo sapiens GN=ACADS PE=4 SV=1 - [E9PE82_HUMAN]            |
| C9JGQ9 | Uncharacterized protein OS=Homo sapiens GN=ACHE PE=4 SV=1 - [C9JGQ9_HUMAN]             |
| B4E3P0 | Uncharacterized protein OS=Homo sapiens GN=ACLY PE=2 SV=1 - [B4E3P0_HUMAN]             |
| F5H2A5 | Uncharacterized protein OS=Homo sapiens GN=ACO2 PE=4 SV=1 - [F5H2A5_HUMAN]             |
| F5H2L4 | Uncharacterized protein OS=Homo sapiens GN=ACOT13 PE=4 SV=1 - [F5H2L4_HUMAN]           |
| F5GWW7 | Uncharacterized protein OS=Homo sapiens GN=ACP2 PE=4 SV=1 - [F5GWW7_HUMAN]             |
| E7ERD7 | Uncharacterized protein OS=Homo sapiens GN=ACSL6 PE=4 SV=1 - [E7ERD7_HUMAN]            |
| F5H6F4 | Uncharacterized protein OS=Homo sapiens GN=ACSS1 PE=4 SV=1 - [F5H6F4_HUMAN]            |
| E7EWU3 | Uncharacterized protein OS=Homo sapiens GN=ACSS2 PE=4 SV=1 - [E7EWU3_HUMAN]            |
| F5GXS2 | Uncharacterized protein OS=Homo sapiens GN=ACTN4 PE=4 SV=1 - [F5GXS2_HUMAN]            |
| F5H3P5 | Uncharacterized protein OS=Homo sapiens GN=ACTR3 PE=3 SV=1 - [F5H3P5_HUMAN]            |
| C9JTM0 | Uncharacterized protein OS=Homo sapiens GN=ADD2 PE=4 SV=2 - [C9JTM0_HUMAN]             |
| E7EQY8 | Uncharacterized protein OS=Homo sapiens GN=ADPGK PE=4 SV=2 - [E7EQY8_HUMAN]            |
| E7EWH4 | Uncharacterized protein OS=Homo sapiens GN=AK2 PE=3 SV=1 - [E7EWH4_HUMAN]              |
| E7ET30 | Uncharacterized protein OS=Homo sapiens GN=AK3 PE=3 SV=1 - [E7ET30_HUMAN]              |
| B7Z5R1 | Uncharacterized protein OS=Homo sapiens GN=AKT1 PE=2 SV=1 - [B7Z5R1_HUMAN]             |
| B4DLJ0 | Uncharacterized protein OS=Homo sapiens GN=ALDH1B1 PE=2 SV=1 - [B4DLJ0_HUMAN]          |
| F5H328 | Uncharacterized protein OS=Homo sapiens GN=ALDH5A1 PE=3 SV=1 - [F5H328_HUMAN]          |
| E9PPG2 | Uncharacterized protein OS=Homo sapiens GN=AMPD3 PE=4 SV=1 - [E9PPG2_HUMAN]            |
| E7EVE3 | Uncharacterized protein OS=Homo sapiens GN=ANK1 PE=4 SV=1 - [E7EVE3_HUMAN]             |
| E9PHW9 | Uncharacterized protein OS=Homo sapiens GN=ANK2 PE=4 SV=1 - [E9PHW9_HUMAN]             |
| F5H754 | Uncharacterized protein OS=Homo sapiens GN=ANKFY1 PE=4 SV=1 - [F5H754_HUMAN]           |
| B5MEE3 | Uncharacterized protein OS=Homo sapiens GN=ANKRD17 PE=4 SV=2 - [B5MEE3_HUMAN]          |
| B4DIW9 | Uncharacterized protein OS=Homo sapiens GN=ANKRD28 PE=2 SV=1 - [B4DIW9_HUMAN]          |
| F2Z3H3 | Uncharacterized protein OS=Homo sapiens GN=ANP32A PE=4 SV=2 - [F2Z3H3_HUMAN]           |
| E9PPH5 | Uncharacterized protein OS=Homo sapiens GN=ANP32E PE=4 SV=1 - [E9PPH5_HUMAN]           |
| E9PHT9 | Uncharacterized protein OS=Homo sapiens GN=ANXA5 PE=3 SV=1 - [E9PHT9_HUMAN]            |
| F5H0H0 | Uncharacterized protein OS=Homo sapiens GN=AP2M1 PE=4 SV=1 - [F5H0H0_HUMAN]            |
| F5H093 | Uncharacterized protein OS=Homo sapiens GN=AP3B1 PE=4 SV=1 - [F5H093_HUMAN]            |
| C9JX71 | Uncharacterized protein OS=Homo sapiens GN=APOD PE=4 SV=1 - [C9JX71_HUMAN]             |
| E9PC21 | Uncharacterized protein OS=Homo sapiens GN=AQP1 PE=3 SV=1 - [E9PC21_HUMAN]             |
| B7ZB63 | Uncharacterized protein OS=Homo sapiens GN=ARF3 PE=2 SV=1 - [B7ZB63_HUMAN]             |
| E9PNT2 | Uncharacterized protein OS=Homo sapiens GN=ARHGAP27 PE=4 SV=1 - [E9PNT2_HUMAN]         |
| F5GY14 | Uncharacterized protein OS=Homo sapiens GN=ARL6IP1 PE=4 SV=1 - [F5GY14_HUMAN]          |

|        |                                                                                 |
|--------|---------------------------------------------------------------------------------|
| E9PER8 | Uncharacterized protein OS=Homo sapiens GN=ARL6IP5 PE=4 SV=1 - [E9PER8_HUMAN]   |
| E5RHK3 | Uncharacterized protein OS=Homo sapiens GN=ARMC1 PE=4 SV=1 - [E5RHK3_HUMAN]     |
| B7Z7I1 | Uncharacterized protein OS=Homo sapiens GN=ARMC4 PE=2 SV=1 - [B7Z7I1_HUMAN]     |
| B4DLQ7 | Uncharacterized protein OS=Homo sapiens GN=ARPC1A PE=2 SV=1 - [B4DLQ7_HUMAN]    |
| E7ERV9 | Uncharacterized protein OS=Homo sapiens GN=ASAH1 PE=4 SV=1 - [E7ERV9_HUMAN]     |
| E7EVN0 | Uncharacterized protein OS=Homo sapiens GN=ASNA1 PE=4 SV=1 - [E7EVN0_HUMAN]     |
| C9JAL9 | Uncharacterized protein OS=Homo sapiens GN=ASPSCR1 PE=4 SV=1 - [C9JAL9_HUMAN]   |
| F5GWY2 | Uncharacterized protein OS=Homo sapiens GN=ATIC PE=4 SV=1 - [F5GWY2_HUMAN]      |
| F5H6I7 | Uncharacterized protein OS=Homo sapiens GN=ATL3 PE=4 SV=1 - [F5H6I7_HUMAN]      |
| F5H3A1 | Uncharacterized protein OS=Homo sapiens GN=ATP1A1 PE=3 SV=1 - [F5H3A1_HUMAN]    |
| D6R9H7 | Uncharacterized protein OS=Homo sapiens GN=ATP5G1 PE=3 SV=1 - [D6R9H7_HUMAN]    |
| E9PN17 | Uncharacterized protein OS=Homo sapiens GN=ATP5L PE=4 SV=1 - [E9PN17_HUMAN]     |
| F5H569 | Uncharacterized protein OS=Homo sapiens GN=ATP6V0A1 PE=4 SV=1 - [F5H569_HUMAN]  |
| B7Z1R5 | Uncharacterized protein OS=Homo sapiens GN=ATP6V1A PE=2 SV=1 - [B7Z1R5_HUMAN]   |
| A8MQ60 | Uncharacterized protein OS=Homo sapiens GN=ATP6V1C1 PE=4 SV=1 - [A8MQ60_HUMAN]  |
| A8MUN4 | Uncharacterized protein OS=Homo sapiens GN=ATP6V1E1 PE=2 SV=1 - [A8MUN4_HUMAN]  |
| E9PGE6 | Uncharacterized protein OS=Homo sapiens GN=ATP6V1H PE=4 SV=1 - [E9PGE6_HUMAN]   |
| E7EU18 | Uncharacterized protein OS=Homo sapiens GN=AUP1 PE=4 SV=1 - [E7EU18_HUMAN]      |
| C9JAB1 | Uncharacterized protein OS=Homo sapiens GN=AZGP1 PE=4 SV=1 - [C9JAB1_HUMAN]     |
| B4DXE2 | Uncharacterized protein OS=Homo sapiens GN=BAG2 PE=2 SV=1 - [B4DXE2_HUMAN]      |
| E7EX43 | Uncharacterized protein OS=Homo sapiens GN=BBS9 PE=4 SV=1 - [E7EX43_HUMAN]      |
| A6NME1 | Uncharacterized protein OS=Homo sapiens GN=BCAP29 PE=2 SV=2 - [A6NME1_HUMAN]    |
| A8MVZ6 | Uncharacterized protein OS=Homo sapiens GN=BICD1 PE=4 SV=2 - [A8MVZ6_HUMAN]     |
| F5H7R6 | Uncharacterized protein OS=Homo sapiens GN=BLM PE=4 SV=1 - [F5H7R6_HUMAN]       |
| B0AZS9 | Uncharacterized protein OS=Homo sapiens GN=BNIP3L PE=2 SV=1 - [B0AZS9_HUMAN]    |
| E9PH68 | Uncharacterized protein OS=Homo sapiens GN=BRCA1 PE=4 SV=1 - [E9PH68_HUMAN]     |
| A6NF68 | Uncharacterized protein OS=Homo sapiens GN=BRDT PE=4 SV=1 - [A6NF68_HUMAN]      |
| B4DM89 | Uncharacterized protein OS=Homo sapiens GN=BSDC1 PE=2 SV=1 - [B4DM89_HUMAN]     |
| E9PL10 | Uncharacterized protein OS=Homo sapiens GN=BTF3L4 PE=4 SV=1 - [E9PL10_HUMAN]    |
| B4DDM6 | Uncharacterized protein OS=Homo sapiens GN=BUB3 PE=2 SV=1 - [B4DDM6_HUMAN]      |
| E9PBZ7 | Uncharacterized protein OS=Homo sapiens GN=C13orf38 PE=4 SV=1 - [E9PBZ7_HUMAN]  |
| E5RK14 | Uncharacterized protein OS=Homo sapiens GN=C14orf159 PE=4 SV=1 - [E5RK14_HUMAN] |
| F5H2W0 | Uncharacterized protein OS=Homo sapiens GN=C18orf8 PE=4 SV=1 - [F5H2W0_HUMAN]   |
| E5RI90 | Uncharacterized protein OS=Homo sapiens GN=C1orf198 PE=4 SV=1 - [E5RI90_HUMAN]  |
| E9PCW3 | Uncharacterized protein OS=Homo sapiens GN=C22orf28 PE=4 SV=1 - [E9PCW3_HUMAN]  |
| C9J384 | Uncharacterized protein OS=Homo sapiens GN=C3orf26 PE=4 SV=1 - [C9J384_HUMAN]   |
| E7ETQ0 | Uncharacterized protein OS=Homo sapiens GN=C4orf26 PE=4 SV=1 - [E7ETQ0_HUMAN]   |
| F5H200 | Uncharacterized protein OS=Homo sapiens GN=C6orf146 PE=4 SV=1 - [F5H200_HUMAN]  |
| C9JGX5 | Uncharacterized protein OS=Homo sapiens GN=C9orf174 PE=4 SV=1 - [C9JGX5_HUMAN]  |
| C9K005 | Uncharacterized protein OS=Homo sapiens GN=C9orf5 PE=4 SV=2 - [C9K005_HUMAN]    |
| E5RJF6 | Uncharacterized protein OS=Homo sapiens GN=CA1 PE=4 SV=1 - [E5RJF6_HUMAN]       |
| E7EWT6 | Uncharacterized protein OS=Homo sapiens GN=CALCOCO1 PE=4 SV=2 - [E7EWT6_HUMAN]  |
| C9JUG7 | Uncharacterized protein OS=Homo sapiens GN=CAPZA2 PE=4 SV=1 - [C9JUG7_HUMAN]    |



|        |                                                                               |
|--------|-------------------------------------------------------------------------------|
| D6RC54 | Uncharacterized protein OS=Homo sapiens GN=CAST PE=4 SV=1 - [D6RC54_HUMAN]    |
| E7EVY3 | Uncharacterized protein OS=Homo sapiens GN=CAST PE=4 SV=1 - [E7EVY3_HUMAN]    |
| E9PCH5 | Uncharacterized protein OS=Homo sapiens GN=CAST PE=4 SV=1 - [E9PCH5_HUMAN]    |
| C9JMM0 | Uncharacterized protein OS=Homo sapiens GN=CBX3 PE=4 SV=1 - [C9JMM0_HUMAN]    |
| F5GWI9 | Uncharacterized protein OS=Homo sapiens GN=CCDC53 PE=4 SV=1 - [F5GWI9_HUMAN]  |
| C9JPL0 | Uncharacterized protein OS=Homo sapiens GN=CCNL1 PE=3 SV=1 - [C9JPL0_HUMAN]   |
| E9PAQ6 | Uncharacterized protein OS=Homo sapiens GN=CCT3 PE=3 SV=1 - [E9PAQ6_HUMAN]    |
| E9PB22 | Uncharacterized protein OS=Homo sapiens GN=CD47 PE=4 SV=1 - [E9PB22_HUMAN]    |
| E9PNW4 | Uncharacterized protein OS=Homo sapiens GN=CD59 PE=4 SV=1 - [E9PNW4_HUMAN]    |
| E9PC70 | Uncharacterized protein OS=Homo sapiens GN=CD82 PE=4 SV=1 - [E9PC70_HUMAN]    |
| E7ESI2 | Uncharacterized protein OS=Homo sapiens GN=CDK2 PE=3 SV=1 - [E7ESI2_HUMAN]    |
| F5H5A6 | Uncharacterized protein OS=Homo sapiens GN=CENPT PE=4 SV=1 - [F5H5A6_HUMAN]   |
| F5GYE8 | Uncharacterized protein OS=Homo sapiens GN=CEP112 PE=4 SV=1 - [F5GYE8_HUMAN]  |
| E9PD62 | Uncharacterized protein OS=Homo sapiens GN=CEP250 PE=4 SV=1 - [E9PD62_HUMAN]  |
| E9PP50 | Uncharacterized protein OS=Homo sapiens GN=CFL1 PE=4 SV=1 - [E9PP50_HUMAN]    |
| C9J0A7 | Uncharacterized protein OS=Homo sapiens GN=CHMP2B PE=4 SV=1 - [C9J0A7_HUMAN]  |
| B7Z5Z4 | Uncharacterized protein OS=Homo sapiens GN=CLCN4 PE=2 SV=1 - [B7Z5Z4_HUMAN]   |
| E9PDB9 | Uncharacterized protein OS=Homo sapiens GN=CLCN7 PE=4 SV=1 - [E9PDB9_HUMAN]   |
| E7EQ42 | Uncharacterized protein OS=Homo sapiens GN=CLIP1 PE=4 SV=2 - [E7EQ42_HUMAN]   |
| B4DIN1 | Uncharacterized protein OS=Homo sapiens GN=CLTA PE=2 SV=1 - [B4DIN1_HUMAN]    |
| F5H6N3 | Uncharacterized protein OS=Homo sapiens GN=CLTA PE=4 SV=1 - [F5H6N3_HUMAN]    |
| A6NCT7 | Uncharacterized protein OS=Homo sapiens GN=COL16A1 PE=4 SV=1 - [A6NCT7_HUMAN] |
| F5GX37 | Uncharacterized protein OS=Homo sapiens GN=COL5A2 PE=4 SV=1 - [F5GX37_HUMAN]  |
| F5GXH1 | Uncharacterized protein OS=Homo sapiens GN=COPG PE=4 SV=1 - [F5GXH1_HUMAN]    |
| B4DY81 | Uncharacterized protein OS=Homo sapiens GN=COPS3 PE=2 SV=1 - [B4DY81_HUMAN]   |
| E7EM64 | Uncharacterized protein OS=Homo sapiens GN=COPS6 PE=4 SV=1 - [E7EM64_HUMAN]   |
| F5H4Z0 | Uncharacterized protein OS=Homo sapiens GN=COPS7A PE=4 SV=1 - [F5H4Z0_HUMAN]  |
| B4DHZ0 | Uncharacterized protein OS=Homo sapiens GN=COPZ1 PE=2 SV=1 - [B4DHZ0_HUMAN]   |
| A8MZ71 | Uncharacterized protein OS=Homo sapiens GN=COX7A2 PE=4 SV=1 - [A8MZ71_HUMAN]  |
| E5RJZ1 | Uncharacterized protein OS=Homo sapiens GN=COX7A2L PE=4 SV=1 - [E5RJZ1_HUMAN] |
| D6R9Z7 | Uncharacterized protein OS=Homo sapiens GN=COX7C PE=4 SV=1 - [D6R9Z7_HUMAN]   |
| E9PDY4 | Uncharacterized protein OS=Homo sapiens GN=CR1 PE=4 SV=1 - [E9PDY4_HUMAN]     |
| E7EU96 | Uncharacterized protein OS=Homo sapiens GN=CSNK2A1 PE=4 SV=1 - [E7EU96_HUMAN] |
| E9PP21 | Uncharacterized protein OS=Homo sapiens GN=CSR1 PE=4 SV=1 - [E9PP21_HUMAN]    |
| C9IYG0 | Uncharacterized protein OS=Homo sapiens GN=CTDSP1 PE=4 SV=1 - [C9IYG0_HUMAN]  |
| C9IZ88 | Uncharacterized protein OS=Homo sapiens GN=CTNNA2 PE=4 SV=1 - [C9IZ88_HUMAN]  |
| F5GWW0 | Uncharacterized protein OS=Homo sapiens GN=CTSB PE=3 SV=1 - [F5GWW0_HUMAN]    |
| E9PI30 | Uncharacterized protein OS=Homo sapiens GN=CTSW PE=3 SV=1 - [E9PI30_HUMAN]    |
| B4E358 | Uncharacterized protein OS=Homo sapiens GN=CTTN PE=2 SV=1 - [B4E358_HUMAN]    |
| E7EWR0 | Uncharacterized protein OS=Homo sapiens GN=CUL1 PE=3 SV=1 - [E7EWR0_HUMAN]    |
| A8MSH7 | Uncharacterized protein OS=Homo sapiens GN=CUL4A PE=3 SV=1 - [A8MSH7_HUMAN]   |
| D6RFH4 | Uncharacterized protein OS=Homo sapiens GN=CYB5B PE=3 SV=1 - [D6RFH4_HUMAN]   |
| B4DWD7 | Uncharacterized protein OS=Homo sapiens GN=CYBRD1 PE=2 SV=1 - [B4DWD7_HUMAN]  |

|        |                                                                               |
|--------|-------------------------------------------------------------------------------|
| C9JFR7 | Uncharacterized protein OS=Homo sapiens GN=CYCS PE=3 SV=1 - [C9JFR7_HUMAN]    |
| B4DDP6 | Uncharacterized protein OS=Homo sapiens GN=DBNL PE=2 SV=1 - [B4DDP6_HUMAN]    |
| B7Z8C9 | Uncharacterized protein OS=Homo sapiens GN=DCAF8 PE=2 SV=1 - [B7Z8C9_HUMAN]   |
| E9PFS5 | Uncharacterized protein OS=Homo sapiens GN=DCTN1 PE=4 SV=1 - [E9PFS5_HUMAN]   |
| E5RI97 | Uncharacterized protein OS=Homo sapiens GN=DCTN4 PE=4 SV=1 - [E5RI97_HUMAN]   |
| E7EWW8 | Uncharacterized protein OS=Homo sapiens GN=DCTN5 PE=4 SV=1 - [E7EWW8_HUMAN]   |
| C9J8R4 | Uncharacterized protein OS=Homo sapiens GN=DCUN1D1 PE=4 SV=1 - [C9J8R4_HUMAN] |
| E7EWT1 | Uncharacterized protein OS=Homo sapiens GN=DDOST PE=4 SV=1 - [E7EWT1_HUMAN]   |
| B4DME8 | Uncharacterized protein OS=Homo sapiens GN=DDX1 PE=2 SV=1 - [B4DME8_HUMAN]    |
| B4E3E8 | Uncharacterized protein OS=Homo sapiens GN=DDX3X PE=2 SV=1 - [B4E3E8_HUMAN]   |
| B4E132 | Uncharacterized protein OS=Homo sapiens GN=DDX3Y PE=2 SV=1 - [B4E132_HUMAN]   |
| B7Z6B8 | Uncharacterized protein OS=Homo sapiens GN=DECR1 PE=2 SV=1 - [B7Z6B8_HUMAN]   |
| F5H853 | Uncharacterized protein OS=Homo sapiens GN=DEF6 PE=4 SV=1 - [F5H853_HUMAN]    |
| F5H0H1 | Uncharacterized protein OS=Homo sapiens GN=DHCR24 PE=4 SV=1 - [F5H0H1_HUMAN]  |
| E7ERW8 | Uncharacterized protein OS=Homo sapiens GN=DIAPH1 PE=4 SV=1 - [E7ERW8_HUMAN]  |
| E7EMA5 | Uncharacterized protein OS=Homo sapiens GN=DIP2A PE=4 SV=2 - [E7EMA5_HUMAN]   |
| F5H7M3 | Uncharacterized protein OS=Homo sapiens GN=DLAT PE=3 SV=1 - [F5H7M3_HUMAN]    |
| E7EQD7 | Uncharacterized protein OS=Homo sapiens GN=DLG1 PE=4 SV=1 - [E7EQD7_HUMAN]    |
| E7EMZ0 | Uncharacterized protein OS=Homo sapiens GN=DMXL1 PE=4 SV=1 - [E7EMZ0_HUMAN]   |
| F5GWV1 | Uncharacterized protein OS=Homo sapiens GN=DNAJA4 PE=4 SV=1 - [F5GWV1_HUMAN]  |
| C9JXB9 | Uncharacterized protein OS=Homo sapiens GN=DNAJB2 PE=4 SV=1 - [C9JXB9_HUMAN]  |
| E9PEQ4 | Uncharacterized protein OS=Homo sapiens GN=DNM2 PE=3 SV=1 - [E9PEQ4_HUMAN]    |
| E3W974 | Uncharacterized protein OS=Homo sapiens GN=DNPEP PE=4 SV=2 - [E3W974_HUMAN]   |
| E7EV00 | Uncharacterized protein OS=Homo sapiens GN=DOCK10 PE=4 SV=2 - [E7EV00_HUMAN]  |
| C9JDB3 | Uncharacterized protein OS=Homo sapiens GN=DOCK4 PE=4 SV=1 - [C9JDB3_HUMAN]   |
| E9PNX5 | Uncharacterized protein OS=Homo sapiens GN=DPP3 PE=4 SV=1 - [E9PNX5_HUMAN]    |
| B4DIZ0 | Uncharacterized protein OS=Homo sapiens GN=DRP2 PE=2 SV=1 - [B4DIZ0_HUMAN]    |
| E7ERU0 | Uncharacterized protein OS=Homo sapiens GN=DST PE=4 SV=1 - [E7ERU0_HUMAN]     |
| E7ETW8 | Uncharacterized protein OS=Homo sapiens GN=DYSF PE=4 SV=1 - [E7ETW8_HUMAN]    |
| F1LLU7 | Uncharacterized protein OS=Homo sapiens GN=ECI2 PE=4 SV=1 - [F1LLU7_HUMAN]    |
| A6NJH9 | Uncharacterized protein OS=Homo sapiens GN=EIF1AY PE=4 SV=1 - [A6NJH9_HUMAN]  |
| F5H6W1 | Uncharacterized protein OS=Homo sapiens GN=EIF2B4 PE=3 SV=1 - [F5H6W1_HUMAN]  |
| B4DV79 | Uncharacterized protein OS=Homo sapiens GN=EIF3B PE=2 SV=1 - [B4DV79_HUMAN]   |
| B4DVQ5 | Uncharacterized protein OS=Homo sapiens GN=EIF3C PE=2 SV=1 - [B4DVQ5_HUMAN]   |
| B4DYY1 | Uncharacterized protein OS=Homo sapiens GN=EIF3D PE=2 SV=1 - [B4DYY1_HUMAN]   |
| B7ZAM9 | Uncharacterized protein OS=Homo sapiens GN=EIF3K PE=2 SV=1 - [B7ZAM9_HUMAN]   |
| E7EQG2 | Uncharacterized protein OS=Homo sapiens GN=EIF4A2 PE=3 SV=1 - [E7EQG2_HUMAN]  |
| E7EPC9 | Uncharacterized protein OS=Homo sapiens GN=EIF4B PE=4 SV=1 - [E7EPC9_HUMAN]   |
| E7EX73 | Uncharacterized protein OS=Homo sapiens GN=EIF4G1 PE=4 SV=1 - [E7EX73_HUMAN]  |
| E9PCV8 | Uncharacterized protein OS=Homo sapiens GN=EIF4G2 PE=4 SV=1 - [E9PCV8_HUMAN]  |
| C9JIW2 | Uncharacterized protein OS=Homo sapiens GN=ELMO1 PE=4 SV=1 - [C9JIW2_HUMAN]   |
| D6RBS5 | Uncharacterized protein OS=Homo sapiens GN=ELMOD2 PE=4 SV=1 - [D6RBS5_HUMAN]  |
| E9PEW9 | Uncharacterized protein OS=Homo sapiens GN=EPB41 PE=4 SV=1 - [E9PEW9_HUMAN]   |

|        |                                                                               |
|--------|-------------------------------------------------------------------------------|
| E9PEX0 | Uncharacterized protein OS=Homo sapiens GN=EPB41 PE=4 SV=1 - [E9PEX0_HUMAN]   |
| E9PPD9 | Uncharacterized protein OS=Homo sapiens GN=EPB41L2 PE=4 SV=1 - [E9PPD9_HUMAN] |
| A8K968 | Uncharacterized protein OS=Homo sapiens GN=EPB41L3 PE=2 SV=1 - [A8K968_HUMAN] |
| E9PNT0 | Uncharacterized protein OS=Homo sapiens GN=EPS8L2 PE=4 SV=1 - [E9PNT0_HUMAN]  |
| F5GZU8 | Uncharacterized protein OS=Homo sapiens GN=ERC1 PE=4 SV=1 - [F5GZU8_HUMAN]    |
| E5RHW4 | Uncharacterized protein OS=Homo sapiens GN=ERLIN2 PE=4 SV=1 - [E5RHW4_HUMAN]  |
| B4DT43 | Uncharacterized protein OS=Homo sapiens GN=ETFA PE=2 SV=1 - [B4DT43_HUMAN]    |
| C9JT69 | Uncharacterized protein OS=Homo sapiens GN=ETFDH PE=4 SV=1 - [C9JT69_HUMAN]   |
| E9PED2 | Uncharacterized protein OS=Homo sapiens GN=EXOC4 PE=4 SV=1 - [E9PED2_HUMAN]   |
| B4DEJ6 | Uncharacterized protein OS=Homo sapiens GN=FAF1 PE=2 SV=1 - [B4DEJ6_HUMAN]    |
| B4E2M8 | Uncharacterized protein OS=Homo sapiens GN=FAF2 PE=2 SV=1 - [B4E2M8_HUMAN]    |
| D6REQ2 | Uncharacterized protein OS=Homo sapiens GN=FAM193B PE=4 SV=2 - [D6REQ2_HUMAN] |
| F5H817 | Uncharacterized protein OS=Homo sapiens GN=FAT3 PE=4 SV=1 - [F5H817_HUMAN]    |
| E9PG79 | Uncharacterized protein OS=Homo sapiens GN=FCHO2 PE=4 SV=1 - [E9PG79_HUMAN]   |
| B7Z7G2 | Uncharacterized protein OS=Homo sapiens GN=FDXR PE=2 SV=1 - [B7Z7G2_HUMAN]    |
| B4DVN5 | Uncharacterized protein OS=Homo sapiens GN=FHOD1 PE=2 SV=1 - [B4DVN5_HUMAN]   |
| C9JN41 | Uncharacterized protein OS=Homo sapiens GN=FILIP1L PE=4 SV=1 - [C9JN41_HUMAN] |
| F5H0N4 | Uncharacterized protein OS=Homo sapiens GN=FKBP2 PE=3 SV=1 - [F5H0N4_HUMAN]   |
| B7Z7Z8 | Uncharacterized protein OS=Homo sapiens GN=FKBP5 PE=2 SV=1 - [B7Z7Z8_HUMAN]   |
| F5H453 | Uncharacterized protein OS=Homo sapiens GN=FLII PE=4 SV=1 - [F5H453_HUMAN]    |
| A8MQB8 | Uncharacterized protein OS=Homo sapiens GN=FMR1 PE=4 SV=1 - [A8MQB8_HUMAN]    |
| B4DY49 | Uncharacterized protein OS=Homo sapiens GN=FRK PE=2 SV=1 - [B4DY49_HUMAN]     |
| B4E0X8 | Uncharacterized protein OS=Homo sapiens GN=FUBP1 PE=2 SV=1 - [B4E0X8_HUMAN]   |
| B4DR70 | Uncharacterized protein OS=Homo sapiens GN=FUS PE=2 SV=1 - [B4DR70_HUMAN]     |
| B3KPS6 | Uncharacterized protein OS=Homo sapiens GN=FYN PE=2 SV=1 - [B3KPS6_HUMAN]     |
| F5H4D6 | Uncharacterized protein OS=Homo sapiens GN=G3BP1 PE=4 SV=1 - [F5H4D6_HUMAN]   |
| D6RFJ8 | Uncharacterized protein OS=Homo sapiens GN=G3BP2 PE=4 SV=1 - [D6RFJ8_HUMAN]   |
| B7Z8V8 | Uncharacterized protein OS=Homo sapiens GN=GALNT2 PE=2 SV=1 - [B7Z8V8_HUMAN]  |
| E9PKU7 | Uncharacterized protein OS=Homo sapiens GN=GANAB PE=4 SV=1 - [E9PKU7_HUMAN]   |
| E7EPW1 | Uncharacterized protein OS=Homo sapiens GN=GAPDH PE=3 SV=1 - [E7EPW1_HUMAN]   |
| C9JPA8 | Uncharacterized protein OS=Homo sapiens GN=GET4 PE=4 SV=1 - [C9JPA8_HUMAN]    |
| F5GYQ4 | Uncharacterized protein OS=Homo sapiens GN=GLUD1 PE=4 SV=1 - [F5GYQ4_HUMAN]   |
| F5H7W9 | Uncharacterized protein OS=Homo sapiens GN=GOLPH3 PE=4 SV=1 - [F5H7W9_HUMAN]  |
| F5GWK9 | Uncharacterized protein OS=Homo sapiens GN=GPR116 PE=4 SV=1 - [F5GWK9_HUMAN]  |
| A8MZ27 | Uncharacterized protein OS=Homo sapiens GN=GRID2IP PE=4 SV=2 - [A8MZ27_HUMAN] |
| E7EPY9 | Uncharacterized protein OS=Homo sapiens GN=GRIK1 PE=4 SV=1 - [E7EPY9_HUMAN]   |
| E7EQZ3 | Uncharacterized protein OS=Homo sapiens GN=GSPT1 PE=4 SV=1 - [E7EQZ3_HUMAN]   |
| C9J8R8 | Uncharacterized protein OS=Homo sapiens GN=GYG1 PE=4 SV=1 - [C9J8R8_HUMAN]    |
| C9IYM4 | Uncharacterized protein OS=Homo sapiens GN=GYS1 PE=4 SV=1 - [C9IYM4_HUMAN]    |
| E9PD60 | Uncharacterized protein OS=Homo sapiens GN=HARS2 PE=4 SV=1 - [E9PD60_HUMAN]   |
| C9JBZ4 | Uncharacterized protein OS=Homo sapiens GN=HAUS8 PE=4 SV=1 - [C9JBZ4_HUMAN]   |
| E9PJ90 | Uncharacterized protein OS=Homo sapiens GN=HBS1L PE=4 SV=1 - [E9PJ90_HUMAN]   |
| E9PLX3 | Uncharacterized protein OS=Homo sapiens GN=HBXIP PE=4 SV=1 - [E9PLX3_HUMAN]   |

|        |                                                                                |
|--------|--------------------------------------------------------------------------------|
| E7ERH6 | Uncharacterized protein OS=Homo sapiens GN=HDAC6 PE=4 SV=1 - [E7ERH6_HUMAN]    |
| C9JJI9 | Uncharacterized protein OS=Homo sapiens GN=HERC6 PE=4 SV=1 - [C9JJI9_HUMAN]    |
| F5H5Y5 | Uncharacterized protein OS=Homo sapiens GN=HGS PE=4 SV=1 - [F5H5Y5_HUMAN]      |
| E9PL41 | Uncharacterized protein OS=Homo sapiens GN=HIF1AN PE=4 SV=1 - [E9PL41_HUMAN]   |
| E9PCK0 | Uncharacterized protein OS=Homo sapiens GN=HK1 PE=3 SV=1 - [E9PCK0_HUMAN]      |
| F5H345 | Uncharacterized protein OS=Homo sapiens GN=HMBS PE=4 SV=1 - [F5H345_HUMAN]     |
| F2Z2W6 | Uncharacterized protein OS=Homo sapiens GN=HMGN1 PE=4 SV=1 - [F2Z2W6_HUMAN]    |
| E9PEK0 | Uncharacterized protein OS=Homo sapiens GN=HMGXB3 PE=4 SV=1 - [E9PEK0_HUMAN]   |
| A6NGP5 | Uncharacterized protein OS=Homo sapiens GN=HN1L PE=2 SV=2 - [A6NGP5_HUMAN]     |
| D6R9P3 | Uncharacterized protein OS=Homo sapiens GN=HNRNPAB PE=4 SV=1 - [D6R9P3_HUMAN]  |
| B2R603 | Uncharacterized protein OS=Homo sapiens GN=HNRNPC PE=2 SV=1 - [B2R603_HUMAN]   |
| B4DTC3 | Uncharacterized protein OS=Homo sapiens GN=HNRNPD PE=2 SV=1 - [B4DTC3_HUMAN]   |
| E9PCY7 | Uncharacterized protein OS=Homo sapiens GN=HNRNPH1 PE=4 SV=1 - [E9PCY7_HUMAN]  |
| B3KX72 | Uncharacterized protein OS=Homo sapiens GN=HNRNPU PE=2 SV=1 - [B3KX72_HUMAN]   |
| E9PDE8 | Uncharacterized protein OS=Homo sapiens GN=HSPA4L PE=3 SV=1 - [E9PDE8_HUMAN]   |
| B7Z4V2 | Uncharacterized protein OS=Homo sapiens GN=HSPA9 PE=2 SV=1 - [B7Z4V2_HUMAN]    |
| B4DY72 | Uncharacterized protein OS=Homo sapiens GN=HSPH1 PE=2 SV=1 - [B4DY72_HUMAN]    |
| E9PD66 | Uncharacterized protein OS=Homo sapiens GN=HUWE1 PE=4 SV=1 - [E9PD66_HUMAN]    |
| E9PDR5 | Uncharacterized protein OS=Homo sapiens GN=IBTK PE=4 SV=1 - [E9PDR5_HUMAN]     |
| B7Z9J8 | Uncharacterized protein OS=Homo sapiens GN=IDH3A PE=2 SV=1 - [B7Z9J8_HUMAN]    |
| E9PDD5 | Uncharacterized protein OS=Homo sapiens GN=IDH3G PE=3 SV=1 - [E9PDD5_HUMAN]    |
| F5H0L4 | Uncharacterized protein OS=Homo sapiens GN=IER5 PE=4 SV=1 - [F5H0L4_HUMAN]     |
| C9JT33 | Uncharacterized protein OS=Homo sapiens GN=IGF2BP1 PE=4 SV=1 - [C9JT33_HUMAN]  |
| D6RGV7 | Uncharacterized protein OS=Homo sapiens GN=IGSF22 PE=4 SV=1 - [D6RGV7_HUMAN]   |
| C9JZ85 | Uncharacterized protein OS=Homo sapiens GN=IKBKG PE=4 SV=1 - [C9JZ85_HUMAN]    |
| B4DFG4 | Uncharacterized protein OS=Homo sapiens GN=ILF3 PE=2 SV=1 - [B4DFG4_HUMAN]     |
| C9J406 | Uncharacterized protein OS=Homo sapiens GN=IMMT PE=4 SV=1 - [C9J406_HUMAN]     |
| C9JUT0 | Uncharacterized protein OS=Homo sapiens GN=ING3 PE=4 SV=1 - [C9JUT0_HUMAN]     |
| E7EMB7 | Uncharacterized protein OS=Homo sapiens GN=IPO11 PE=4 SV=1 - [E7EMB7_HUMAN]    |
| C9JL81 | Uncharacterized protein OS=Homo sapiens GN=IQCD PE=4 SV=1 - [C9JL81_HUMAN]     |
| F5H7A1 | Uncharacterized protein OS=Homo sapiens GN=IQGAP1 PE=4 SV=1 - [F5H7A1_HUMAN]   |
| E7EWZ6 | Uncharacterized protein OS=Homo sapiens GN=ITGAV PE=3 SV=1 - [E7EWZ6_HUMAN]    |
| F5GXQ1 | Uncharacterized protein OS=Homo sapiens GN=ITIH4 PE=4 SV=1 - [F5GXQ1_HUMAN]    |
| F5H153 | Uncharacterized protein OS=Homo sapiens GN=ITSN1 PE=4 SV=1 - [F5H153_HUMAN]    |
| E7EUQ1 | Uncharacterized protein OS=Homo sapiens GN=ITSN2 PE=4 SV=1 - [E7EUQ1_HUMAN]    |
| E9PDU1 | Uncharacterized protein OS=Homo sapiens GN=KARS PE=3 SV=2 - [E9PDU1_HUMAN]     |
| C9J3I2 | Uncharacterized protein OS=Homo sapiens GN=KCMF1 PE=4 SV=1 - [C9J3I2_HUMAN]    |
| Q6ZW95 | Uncharacterized protein OS=Homo sapiens GN=KCNK2 PE=2 SV=1 - [Q6ZW95_HUMAN]    |
| F5H275 | Uncharacterized protein OS=Homo sapiens GN=KDM3B PE=4 SV=1 - [F5H275_HUMAN]    |
| F5GYH2 | Uncharacterized protein OS=Homo sapiens GN=KDM4C PE=4 SV=1 - [F5GYH2_HUMAN]    |
| F5H5V6 | Uncharacterized protein OS=Homo sapiens GN=KDM6A PE=4 SV=1 - [F5H5V6_HUMAN]    |
| C9JCC4 | Uncharacterized protein OS=Homo sapiens GN=KIAA1199 PE=4 SV=1 - [C9JCC4_HUMAN] |
| F5H2Q7 | Uncharacterized protein OS=Homo sapiens GN=KIAA1715 PE=4 SV=1 - [F5H2Q7_HUMAN] |

|        |                                                                                |
|--------|--------------------------------------------------------------------------------|
| E9PFS1 | Uncharacterized protein OS=Homo sapiens GN=KIAA1755 PE=4 SV=1 - [E9PFS1_HUMAN] |
| E9PKB8 | Uncharacterized protein OS=Homo sapiens GN=KIAA1875 PE=4 SV=1 - [E9PKB8_HUMAN] |
| C9JKA9 | Uncharacterized protein OS=Homo sapiens GN=KIF15 PE=4 SV=1 - [C9JKA9_HUMAN]    |
| B7WPD9 | Uncharacterized protein OS=Homo sapiens GN=KIF26B PE=3 SV=1 - [B7WPD9_HUMAN]   |
| F5GYJ7 | Uncharacterized protein OS=Homo sapiens GN=KIF3C PE=3 SV=1 - [F5GYJ7_HUMAN]    |
| B4DFZ5 | Uncharacterized protein OS=Homo sapiens GN=KLHL2 PE=2 SV=1 - [B4DFZ5_HUMAN]    |
| C9J191 | Uncharacterized protein OS=Homo sapiens GN=KLHL22 PE=4 SV=1 - [C9J191_HUMAN]   |
| D6RH21 | Uncharacterized protein OS=Homo sapiens GN=KLHL3 PE=4 SV=1 - [D6RH21_HUMAN]    |
| F2Z383 | Uncharacterized protein OS=Homo sapiens GN=KLRAQ1 PE=4 SV=1 - [F2Z383_HUMAN]   |
| C9JYI4 | Uncharacterized protein OS=Homo sapiens GN=KPNA1 PE=4 SV=1 - [C9JYI4_HUMAN]    |
| E9PCN9 | Uncharacterized protein OS=Homo sapiens GN=KPNA3 PE=4 SV=1 - [E9PCN9_HUMAN]    |
| B7Z2R9 | Uncharacterized protein OS=Homo sapiens GN=LAMP2 PE=2 SV=1 - [B7Z2R9_HUMAN]    |
| F5H479 | Uncharacterized protein OS=Homo sapiens GN=LAMTOR1 PE=4 SV=1 - [F5H479_HUMAN]  |
| E9PHS0 | Uncharacterized protein OS=Homo sapiens GN=LANCL1 PE=4 SV=1 - [E9PHS0_HUMAN]   |
| B4DJ10 | Uncharacterized protein OS=Homo sapiens GN=LARS PE=2 SV=1 - [B4DJ10_HUMAN]     |
| B4E135 | Uncharacterized protein OS=Homo sapiens GN=LIG1 PE=2 SV=1 - [B4E135_HUMAN]     |
| B4DWN1 | Uncharacterized protein OS=Homo sapiens GN=LMAN2 PE=2 SV=1 - [B4DWN1_HUMAN]    |
| E9PBF6 | Uncharacterized protein OS=Homo sapiens GN=LMNB1 PE=3 SV=1 - [E9PBF6_HUMAN]    |
| F5GZH4 | Uncharacterized protein OS=Homo sapiens GN=LNX1 PE=4 SV=1 - [F5GZH4_HUMAN]     |
| B3KXS5 | Uncharacterized protein OS=Homo sapiens GN=LONP1 PE=2 SV=1 - [B3KXS5_HUMAN]    |
| B7Z3N3 | Uncharacterized protein OS=Homo sapiens GN=LPCAT3 PE=2 SV=1 - [B7Z3N3_HUMAN]   |
| B4DS68 | Uncharacterized protein OS=Homo sapiens GN=LRP11 PE=2 SV=1 - [B4DS68_HUMAN]    |
| B4DHL3 | Uncharacterized protein OS=Homo sapiens GN=LRRRC28 PE=2 SV=1 - [B4DHL3_HUMAN]  |
| C9JI57 | Uncharacterized protein OS=Homo sapiens GN=LRRIQ1 PE=4 SV=1 - [C9JI57_HUMAN]   |
| E9PN53 | Uncharacterized protein OS=Homo sapiens GN=LUZP2 PE=4 SV=1 - [E9PN53_HUMAN]    |
| C9J1B9 | Uncharacterized protein OS=Homo sapiens GN=LYSMD4 PE=4 SV=1 - [C9J1B9_HUMAN]   |
| F5GXE0 | Uncharacterized protein OS=Homo sapiens GN=M6PR PE=4 SV=1 - [F5GXE0_HUMAN]     |
| D6RID6 | Uncharacterized protein OS=Homo sapiens GN=MAEA PE=4 SV=1 - [D6RID6_HUMAN]     |
| B4DH53 | Uncharacterized protein OS=Homo sapiens GN=MAP1S PE=2 SV=1 - [B4DH53_HUMAN]    |
| B5MEG9 | Uncharacterized protein OS=Homo sapiens GN=MAP4 PE=4 SV=2 - [B5MEG9_HUMAN]     |
| E7EX83 | Uncharacterized protein OS=Homo sapiens GN=MAP4K4 PE=3 SV=1 - [E7EX83_HUMAN]   |
| E9PFH7 | Uncharacterized protein OS=Homo sapiens GN=MAPK8IP3 PE=4 SV=1 - [E9PFH7_HUMAN] |
| E7ETY4 | Uncharacterized protein OS=Homo sapiens GN=MARK2 PE=4 SV=1 - [E7ETY4_HUMAN]    |
| E7ET05 | Uncharacterized protein OS=Homo sapiens GN=MARS PE=4 SV=1 - [E7ET05_HUMAN]     |
| F5H6C8 | Uncharacterized protein OS=Homo sapiens GN=MAVS PE=4 SV=1 - [F5H6C8_HUMAN]     |
| C9J600 | Uncharacterized protein OS=Homo sapiens GN=MCM10 PE=4 SV=1 - [C9J600_HUMAN]    |
| F5H3Y1 | Uncharacterized protein OS=Homo sapiens GN=MED12 PE=4 SV=1 - [F5H3Y1_HUMAN]    |
| E7EQ94 | Uncharacterized protein OS=Homo sapiens GN=MET PE=4 SV=2 - [E7EQ94_HUMAN]      |
| B4E2X3 | Uncharacterized protein OS=Homo sapiens GN=METTL13 PE=2 SV=1 - [B4E2X3_HUMAN]  |
| E9PGF9 | Uncharacterized protein OS=Homo sapiens GN=MGEA5 PE=4 SV=1 - [E9PGF9_HUMAN]    |
| F5H4V4 | Uncharacterized protein OS=Homo sapiens GN=MKI67 PE=4 SV=1 - [F5H4V4_HUMAN]    |
| C9JI01 | Uncharacterized protein OS=Homo sapiens GN=MLPH PE=4 SV=1 - [C9JI01_HUMAN]     |
| F5H079 | Uncharacterized protein OS=Homo sapiens GN=MMAB PE=4 SV=1 - [F5H079_HUMAN]     |

|        |                                                                                |
|--------|--------------------------------------------------------------------------------|
| B4DWL9 | Uncharacterized protein OS=Homo sapiens GN=MPP7 PE=2 SV=1 - [B4DWL9_HUMAN]     |
| D6RC14 | Uncharacterized protein OS=Homo sapiens GN=MRPL3 PE=3 SV=1 - [D6RC14_HUMAN]    |
| F5H2F9 | Uncharacterized protein OS=Homo sapiens GN=MSH6 PE=3 SV=1 - [F5H2F9_HUMAN]     |
| E9PNT8 | Uncharacterized protein OS=Homo sapiens GN=MTCH2 PE=3 SV=1 - [E9PNT8_HUMAN]    |
| B4DZD5 | Uncharacterized protein OS=Homo sapiens GN=MTOR PE=2 SV=1 - [B4DZD5_HUMAN]     |
| C9JNK6 | Uncharacterized protein OS=Homo sapiens GN=MTX2 PE=4 SV=1 - [C9JNK6_HUMAN]     |
| B4DRZ1 | Uncharacterized protein OS=Homo sapiens GN=MYCN PE=2 SV=1 - [B4DRZ1_HUMAN]     |
| F5H678 | Uncharacterized protein OS=Homo sapiens GN=MYO5B PE=4 SV=1 - [F5H678_HUMAN]    |
| F5GWA6 | Uncharacterized protein OS=Homo sapiens GN=MYPN PE=4 SV=1 - [F5GWA6_HUMAN]     |
| A8MZ22 | Uncharacterized protein OS=Homo sapiens GN=NAP1L4 PE=3 SV=3 - [A8MZ22_HUMAN]   |
| E7EUA9 | Uncharacterized protein OS=Homo sapiens GN=NAV3 PE=4 SV=2 - [E7EUA9_HUMAN]     |
| F5GZJ1 | Uncharacterized protein OS=Homo sapiens GN=NCAPD2 PE=4 SV=1 - [F5GZJ1_HUMAN]   |
| B4E189 | Uncharacterized protein OS=Homo sapiens GN=NCAPH PE=2 SV=1 - [B4E189_HUMAN]    |
| E7EX81 | Uncharacterized protein OS=Homo sapiens GN=NCL PE=4 SV=1 - [E7EX81_HUMAN]      |
| E9PC09 | Uncharacterized protein OS=Homo sapiens GN=NCSTN PE=4 SV=1 - [E9PC09_HUMAN]    |
| F5H1J6 | Uncharacterized protein OS=Homo sapiens GN=NDC80 PE=4 SV=1 - [F5H1J6_HUMAN]    |
| C9IZN5 | Uncharacterized protein OS=Homo sapiens GN=NDUFA5 PE=4 SV=1 - [C9IZN5_HUMAN]   |
| F5H7V7 | Uncharacterized protein OS=Homo sapiens GN=NDUFA8 PE=4 SV=1 - [F5H7V7_HUMAN]   |
| E9PH64 | Uncharacterized protein OS=Homo sapiens GN=NDUFB9 PE=4 SV=1 - [E9PH64_HUMAN]   |
| B4DJ81 | Uncharacterized protein OS=Homo sapiens GN=NDUFS1 PE=2 SV=1 - [B4DJ81_HUMAN]   |
| E9PMX3 | Uncharacterized protein OS=Homo sapiens GN=NDUFV1 PE=4 SV=1 - [E9PMX3_HUMAN]   |
| E9PGQ8 | Uncharacterized protein OS=Homo sapiens GN=NECAP2 PE=4 SV=1 - [E9PGQ8_HUMAN]   |
| D6RBG5 | Uncharacterized protein OS=Homo sapiens GN=NEK1 PE=4 SV=1 - [D6RBG5_HUMAN]     |
| C9J5I7 | Uncharacterized protein OS=Homo sapiens GN=NFKBIZ PE=4 SV=1 - [C9J5I7_HUMAN]   |
| F2Z2E7 | Uncharacterized protein OS=Homo sapiens GN=NFS1 PE=3 SV=1 - [F2Z2E7_HUMAN]     |
| E7ERL0 | Uncharacterized protein OS=Homo sapiens GN=NME1 PE=3 SV=1 - [E7ERL0_HUMAN]     |
| B7Z8J4 | Uncharacterized protein OS=Homo sapiens GN=NMT1 PE=2 SV=1 - [B7Z8J4_HUMAN]     |
| F5GZD4 | Uncharacterized protein OS=Homo sapiens GN=NPC1 PE=4 SV=1 - [F5GZD4_HUMAN]     |
| B4DQV7 | Uncharacterized protein OS=Homo sapiens GN=NPC2 PE=2 SV=1 - [B4DQV7_HUMAN]     |
| E9PN47 | Uncharacterized protein OS=Homo sapiens GN=NPEPL1 PE=4 SV=1 - [E9PN47_HUMAN]   |
| B4DG89 | Uncharacterized protein OS=Homo sapiens GN=NPLOC4 PE=2 SV=1 - [B4DG89_HUMAN]   |
| E9PR11 | Uncharacterized protein OS=Homo sapiens GN=NRBP2 PE=4 SV=1 - [E9PR11_HUMAN]    |
| C9JDR0 | Uncharacterized protein OS=Homo sapiens GN=NSDHL PE=3 SV=1 - [C9JDR0_HUMAN]    |
| D6RAS3 | Uncharacterized protein OS=Homo sapiens GN=NSUN2 PE=4 SV=1 - [D6RAS3_HUMAN]    |
| E9PJP3 | Uncharacterized protein OS=Homo sapiens GN=NUCB2 PE=4 SV=1 - [E9PJP3_HUMAN]    |
| F5H2D1 | Uncharacterized protein OS=Homo sapiens GN=ODZ2 PE=4 SV=1 - [F5H2D1_HUMAN]     |
| E9PFG7 | Uncharacterized protein OS=Homo sapiens GN=OGDH PE=4 SV=1 - [E9PFG7_HUMAN]     |
| E5RFY7 | Uncharacterized protein OS=Homo sapiens GN=OSTM1 PE=4 SV=1 - [E5RFY7_HUMAN]    |
| C9JJI8 | Uncharacterized protein OS=Homo sapiens GN=PAFAH1B1 PE=4 SV=1 - [C9JJI8_HUMAN] |
| E9PBS1 | Uncharacterized protein OS=Homo sapiens GN=PAICS PE=4 SV=1 - [E9PBS1_HUMAN]    |
| E9PHT6 | Uncharacterized protein OS=Homo sapiens GN=PANK4 PE=4 SV=1 - [E9PHT6_HUMAN]    |
| C9J7L3 | Uncharacterized protein OS=Homo sapiens GN=PARP15 PE=4 SV=2 - [C9J7L3_HUMAN]   |
| B7Z3X5 | Uncharacterized protein OS=Homo sapiens GN=PDHA1 PE=2 SV=1 - [B7Z3X5_HUMAN]    |

|        |                                                                                |
|--------|--------------------------------------------------------------------------------|
| B4DDD7 | Uncharacterized protein OS=Homo sapiens GN=PDHB PE=2 SV=1 - [B4DDD7_HUMAN]     |
| B3KQT9 | Uncharacterized protein OS=Homo sapiens GN=PDIA3 PE=2 SV=1 - [B3KQT9_HUMAN]    |
| B7Z254 | Uncharacterized protein OS=Homo sapiens GN=PDIA6 PE=2 SV=1 - [B7Z254_HUMAN]    |
| D6RF83 | Uncharacterized protein OS=Homo sapiens GN=PDLM7 PE=4 SV=1 - [D6RF83_HUMAN]    |
| E7ENB6 | Uncharacterized protein OS=Homo sapiens GN=PDZRN3 PE=4 SV=1 - [E7ENB6_HUMAN]   |
| E9PCE8 | Uncharacterized protein OS=Homo sapiens GN=PEPD PE=3 SV=1 - [E9PCE8_HUMAN]     |
| E5RGS4 | Uncharacterized protein OS=Homo sapiens GN=PFDN1 PE=4 SV=1 - [E5RGS4_HUMAN]    |
| C9JW96 | Uncharacterized protein OS=Homo sapiens GN=PHB PE=4 SV=2 - [C9JW96_HUMAN]      |
| F2Z3N8 | Uncharacterized protein OS=Homo sapiens GN=PHF16 PE=4 SV=1 - [F2Z3N8_HUMAN]    |
| B4DM11 | Uncharacterized protein OS=Homo sapiens GN=PIP4K2C PE=2 SV=1 - [B4DM11_HUMAN]  |
| E9PBQ1 | Uncharacterized protein OS=Homo sapiens GN=PIP5K1A PE=4 SV=1 - [E9PBQ1_HUMAN]  |
| F5H0R5 | Uncharacterized protein OS=Homo sapiens GN=PIP5K1C PE=4 SV=1 - [F5H0R5_HUMAN]  |
| F5H5E2 | Uncharacterized protein OS=Homo sapiens GN=PLBD2 PE=4 SV=1 - [F5H5E2_HUMAN]    |
| C9J228 | Uncharacterized protein OS=Homo sapiens GN=PLCH1 PE=4 SV=1 - [C9J228_HUMAN]    |
| B4DTE8 | Uncharacterized protein OS=Homo sapiens GN=PLSCR1 PE=2 SV=1 - [B4DTE8_HUMAN]   |
| F5H5K9 | Uncharacterized protein OS=Homo sapiens GN=PNPLA6 PE=4 SV=1 - [F5H5K9_HUMAN]   |
| D6R967 | Uncharacterized protein OS=Homo sapiens GN=PPA2 PE=4 SV=1 - [D6R967_HUMAN]     |
| F5H158 | Uncharacterized protein OS=Homo sapiens GN=PPFIA2 PE=4 SV=1 - [F5H158_HUMAN]   |
| B4DY76 | Uncharacterized protein OS=Homo sapiens GN=PPOX PE=2 SV=1 - [B4DY76_HUMAN]     |
| F5H3X9 | Uncharacterized protein OS=Homo sapiens GN=PPP2R1A PE=4 SV=1 - [F5H3X9_HUMAN]  |
| F5GYS1 | Uncharacterized protein OS=Homo sapiens GN=PPP2R5D PE=4 SV=1 - [F5GYS1_HUMAN]  |
| E9PKF6 | Uncharacterized protein OS=Homo sapiens GN=PPP6R3 PE=4 SV=1 - [E9PKF6_HUMAN]   |
| E7EVG6 | Uncharacterized protein OS=Homo sapiens GN=PPRC1 PE=4 SV=1 - [E7EVG6_HUMAN]    |
| A6NP52 | Uncharacterized protein OS=Homo sapiens GN=PRAF2 PE=4 SV=1 - [A6NP52_HUMAN]    |
| E9PH29 | Uncharacterized protein OS=Homo sapiens GN=PRDX3 PE=4 SV=1 - [E9PH29_HUMAN]    |
| E9PEN3 | Uncharacterized protein OS=Homo sapiens GN=PRDX4 PE=4 SV=1 - [E9PEN3_HUMAN]    |
| A8K318 | Uncharacterized protein OS=Homo sapiens GN=PRKCSH PE=2 SV=1 - [A8K318_HUMAN]   |
| F5H180 | Uncharacterized protein OS=Homo sapiens GN=PRKDC PE=4 SV=1 - [F5H180_HUMAN]    |
| E7EPE6 | Uncharacterized protein OS=Homo sapiens GN=PRKG2 PE=4 SV=1 - [E7EPE6_HUMAN]    |
| E9PNR9 | Uncharacterized protein OS=Homo sapiens GN=PRMT1 PE=4 SV=1 - [E9PNR9_HUMAN]    |
| E5RG77 | Uncharacterized protein OS=Homo sapiens GN=PROSC PE=3 SV=1 - [E5RG77_HUMAN]    |
| C9J168 | Uncharacterized protein OS=Homo sapiens GN=PRPSAP1 PE=4 SV=1 - [C9J168_HUMAN]  |
| F5GZ16 | Uncharacterized protein OS=Homo sapiens GN=PSMD2 PE=4 SV=1 - [F5GZ16_HUMAN]    |
| F5H8K4 | Uncharacterized protein OS=Homo sapiens GN=PSMD3 PE=4 SV=1 - [F5H8K4_HUMAN]    |
| B4DZM8 | Uncharacterized protein OS=Homo sapiens GN=PSMD5 PE=2 SV=1 - [B4DZM8_HUMAN]    |
| B4DXI8 | Uncharacterized protein OS=Homo sapiens GN=PSMD7 PE=2 SV=1 - [B4DXI8_HUMAN]    |
| F5H169 | Uncharacterized protein OS=Homo sapiens GN=PSMD9 PE=4 SV=1 - [F5H169_HUMAN]    |
| F5H656 | Uncharacterized protein OS=Homo sapiens GN=PSPC1 PE=4 SV=1 - [F5H656_HUMAN]    |
| B8ZZI3 | Uncharacterized protein OS=Homo sapiens GN=PTMA PE=4 SV=1 - [B8ZZI3_HUMAN]     |
| B4DSN5 | Uncharacterized protein OS=Homo sapiens GN=PTPN1 PE=2 SV=1 - [B4DSN5_HUMAN]    |
| F5H0X4 | Uncharacterized protein OS=Homo sapiens GN=PTPRE PE=4 SV=1 - [F5H0X4_HUMAN]    |
| A8MZH8 | Uncharacterized protein OS=Homo sapiens GN=PTTG1IP PE=4 SV=1 - [A8MZH8_HUMAN]  |
| B5MD87 | Uncharacterized protein OS=Homo sapiens GN=PYCRL PE=4 SV=2 - [B5MD87_HUMAN]    |
| B4DNN3 | Uncharacterized protein OS=Homo sapiens GN=QARS PE=2 SV=1 - [B4DNN3_HUMAN]     |
| E9PK89 | Uncharacterized protein OS=Homo sapiens GN=RAB3IL1 PE=4 SV=1 - [E9PK89_HUMAN]  |
| B4DJA5 | Uncharacterized protein OS=Homo sapiens GN=RAB5A PE=2 SV=1 - [B4DJA5_HUMAN]    |
| F5GZB1 | Uncharacterized protein OS=Homo sapiens GN=RAB6A PE=3 SV=1 - [F5GZB1_HUMAN]    |
| F5GZU7 | Uncharacterized protein OS=Homo sapiens GN=RABEP1 PE=4 SV=1 - [F5GZU7_HUMAN]   |
| C9JXM3 | Uncharacterized protein OS=Homo sapiens GN=RABL3 PE=4 SV=1 - [C9JXM3_HUMAN]    |
| B4DQI8 | Uncharacterized protein OS=Homo sapiens GN=RAP1B PE=2 SV=1 - [B4DQI8_HUMAN]    |
| E9PH06 | Uncharacterized protein OS=Homo sapiens GN=RAP1GDS1 PE=4 SV=1 - [E9PH06_HUMAN] |
| Q8N8Y7 | Uncharacterized protein OS=Homo sapiens GN=RBMX PE=2 SV=1 - [Q8N8Y7_HUMAN]     |
| B7Z1M1 | Uncharacterized protein OS=Homo sapiens GN=RCN1 PE=2 SV=1 - [B7Z1M1_HUMAN]     |

|        |                                                                                |
|--------|--------------------------------------------------------------------------------|
| B7ZKW8 | Uncharacterized protein OS=Homo sapiens GN=RCS1 PE=2 SV=1 - [B7ZKW8_HUMAN]     |
| D6RBN9 | Uncharacterized protein OS=Homo sapiens GN=RELL1 PE=4 SV=1 - [D6RBN9_HUMAN]    |
| A6NKZ2 | Uncharacterized protein OS=Homo sapiens GN=RENBP PE=4 SV=2 - [A6NKZ2_HUMAN]    |
| C9JE27 | Uncharacterized protein OS=Homo sapiens GN=RFLL PE=4 SV=1 - [C9JE27_HUMAN]     |
| F5H250 | Uncharacterized protein OS=Homo sapiens GN=RHAG PE=4 SV=1 - [F5H250_HUMAN]     |
| E7EWZ5 | Uncharacterized protein OS=Homo sapiens GN=RHCE PE=4 SV=1 - [E7EWZ5_HUMAN]     |
| E9PCZ1 | Uncharacterized protein OS=Homo sapiens GN=RIMS1 PE=4 SV=1 - [E9PCZ1_HUMAN]    |
| C9J5S3 | Uncharacterized protein OS=Homo sapiens GN=RINT1 PE=4 SV=1 - [C9J5S3_HUMAN]    |
| E9PKE9 | Uncharacterized protein OS=Homo sapiens GN=RNF121 PE=4 SV=1 - [E9PKE9_HUMAN]   |
| D6RI12 | Uncharacterized protein OS=Homo sapiens GN=RNF213 PE=4 SV=1 - [D6RI12_HUMAN]   |
| E9PMA9 | Uncharacterized protein OS=Homo sapiens GN=RNH1 PE=4 SV=1 - [E9PMA9_HUMAN]     |
| B4DM74 | Uncharacterized protein OS=Homo sapiens GN=RPL18A PE=2 SV=1 - [B4DM74_HUMAN]   |
| C9JXB8 | Uncharacterized protein OS=Homo sapiens GN=RPL24 PE=4 SV=1 - [C9JXB8_HUMAN]    |
| E9PLL6 | Uncharacterized protein OS=Homo sapiens GN=RPL27A PE=3 SV=1 - [E9PLL6_HUMAN]   |
| C9JU56 | Uncharacterized protein OS=Homo sapiens GN=RPL31 PE=4 SV=1 - [C9JU56_HUMAN]    |
| C9K025 | Uncharacterized protein OS=Homo sapiens GN=RPL35A PE=4 SV=1 - [C9K025_HUMAN]   |
| E9PEL3 | Uncharacterized protein OS=Homo sapiens GN=RPL37A PE=4 SV=1 - [E9PEL3_HUMAN]   |
| E9PIZ3 | Uncharacterized protein OS=Homo sapiens GN=RPL8 PE=4 SV=1 - [E9PIZ3_HUMAN]     |
| D6RAN4 | Uncharacterized protein OS=Homo sapiens GN=RPL9 PE=4 SV=1 - [D6RAN4_HUMAN]     |
| D6R910 | Uncharacterized protein OS=Homo sapiens GN=RPS6KA2 PE=4 SV=1 - [D6R910_HUMAN]  |
| C9J9K3 | Uncharacterized protein OS=Homo sapiens GN=RPSA PE=3 SV=1 - [C9J9K3_HUMAN]     |
| B7Z7H6 | Uncharacterized protein OS=Homo sapiens GN=RRAS2 PE=2 SV=1 - [B7Z7H6_HUMAN]    |
| F5H774 | Uncharacterized protein OS=Homo sapiens GN=RTN3 PE=4 SV=1 - [F5H774_HUMAN]     |
| E5RJE3 | Uncharacterized protein OS=Homo sapiens GN=RWDD1 PE=4 SV=1 - [E5RJE3_HUMAN]    |
| C9K0H7 | Uncharacterized protein OS=Homo sapiens GN=RYS3 PE=4 SV=2 - [C9K0H7_HUMAN]     |
| F5H3J5 | Uncharacterized protein OS=Homo sapiens GN=S100A4 PE=4 SV=1 - [F5H3J5_HUMAN]   |
| E9PGZ4 | Uncharacterized protein OS=Homo sapiens GN=SACM1L PE=4 SV=1 - [E9PGZ4_HUMAN]   |
| C9JPX0 | Uncharacterized protein OS=Homo sapiens GN=SAFB2 PE=4 SV=2 - [C9JPX0_HUMAN]    |
| F5H353 | Uncharacterized protein OS=Homo sapiens GN=SCAMP2 PE=4 SV=1 - [F5H353_HUMAN]   |
| E9PEA8 | Uncharacterized protein OS=Homo sapiens GN=SCCPDH PE=4 SV=1 - [E9PEA8_HUMAN]   |
| B7Z5N7 | Uncharacterized protein OS=Homo sapiens GN=SCFD1 PE=2 SV=1 - [B7Z5N7_HUMAN]    |
| E7EW05 | Uncharacterized protein OS=Homo sapiens GN=SDAD1 PE=4 SV=1 - [E7EW05_HUMAN]    |
| E9PBJ5 | Uncharacterized protein OS=Homo sapiens GN=SDHA PE=4 SV=1 - [E9PBJ5_HUMAN]     |
| E7EP00 | Uncharacterized protein OS=Homo sapiens GN=SEC24C PE=4 SV=2 - [E7EP00_HUMAN]   |
| B5MCX3 | Uncharacterized protein OS=Homo sapiens GN=SEPT2 PE=3 SV=1 - [B5MCX3_HUMAN]    |
| B4DNE4 | Uncharacterized protein OS=Homo sapiens GN=SEPT7 PE=2 SV=1 - [B4DNE4_HUMAN]    |
| A6NMH6 | Uncharacterized protein OS=Homo sapiens GN=SEPT8 PE=3 SV=1 - [A6NMH6_HUMAN]    |
| E5RIQ9 | Uncharacterized protein OS=Homo sapiens GN=SERF1A PE=4 SV=1 - [E5RIQ9_HUMAN]   |
| B4DN87 | Uncharacterized protein OS=Homo sapiens GN=SERPINH1 PE=2 SV=1 - [B4DN87_HUMAN] |
| F2Z2A8 | Uncharacterized protein OS=Homo sapiens GN=SGSM2 PE=4 SV=1 - [F2Z2A8_HUMAN]    |
| E7EMJ6 | Uncharacterized protein OS=Homo sapiens GN=SGTA PE=4 SV=1 - [E7EMJ6_HUMAN]     |
| B4DQ94 | Uncharacterized protein OS=Homo sapiens GN=SH3BP5L PE=2 SV=1 - [B4DQ94_HUMAN]  |
| E5RJR5 | Uncharacterized protein OS=Homo sapiens GN=SKP1 PE=4 SV=1 - [E5RJR5_HUMAN]     |
| F5H741 | Uncharacterized protein OS=Homo sapiens GN=SLC11A2 PE=4 SV=1 - [F5H741_HUMAN]  |
| E9PR61 | Uncharacterized protein OS=Homo sapiens GN=SLC14A1 PE=4 SV=1 - [E9PR61_HUMAN]  |
| F5H843 | Uncharacterized protein OS=Homo sapiens GN=SLC16A7 PE=4 SV=1 - [F5H843_HUMAN]  |
| E9PGW3 | Uncharacterized protein OS=Homo sapiens GN=SLC17A1 PE=4 SV=1 - [E9PGW3_HUMAN]  |
| F5GX33 | Uncharacterized protein OS=Homo sapiens GN=SLC25A13 PE=3 SV=1 - [F5GX33_HUMAN] |
| B7Z844 | Uncharacterized protein OS=Homo sapiens GN=SLC2A14 PE=2 SV=1 - [B7Z844_HUMAN]  |
| E7EMT4 | Uncharacterized protein OS=Homo sapiens GN=SLC39A7 PE=4 SV=1 - [E7EMT4_HUMAN]  |
| B4E2Z3 | Uncharacterized protein OS=Homo sapiens GN=SLC3A2 PE=2 SV=1 - [B4E2Z3_HUMAN]   |
| B7Z6X9 | Uncharacterized protein OS=Homo sapiens GN=SLC43A2 PE=2 SV=1 - [B7Z6X9_HUMAN]  |
| E9PS74 | Uncharacterized protein OS=Homo sapiens GN=SLC43A3 PE=4 SV=1 - [E9PS74_HUMAN]  |
| C9JIA1 | Uncharacterized protein OS=Homo sapiens GN=SLFN12 PE=4 SV=1 - [C9JIA1_HUMAN]   |
| D6RBH9 | Uncharacterized protein OS=Homo sapiens GN=SMAD1 PE=4 SV=1 - [D6RBH9_HUMAN]    |
| B7Z799 | Uncharacterized protein OS=Homo sapiens GN=SMARCD1 PE=2 SV=1 - [B7Z799_HUMAN]  |



|        |                                                                                |
|--------|--------------------------------------------------------------------------------|
| E7EPI6 | Uncharacterized protein OS=Homo sapiens GN=SMC1A PE=4 SV=1 - [E7EPI6_HUMAN]    |
| E9PD53 | Uncharacterized protein OS=Homo sapiens GN=SMC4 PE=4 SV=1 - [E9PD53_HUMAN]     |
| E7EPV7 | Uncharacterized protein OS=Homo sapiens GN=SNCA PE=4 SV=1 - [E7EPV7_HUMAN]     |
| E7ESM6 | Uncharacterized protein OS=Homo sapiens GN=SND1 PE=4 SV=2 - [E7ESM6_HUMAN]     |
| C9J1U1 | Uncharacterized protein OS=Homo sapiens GN=SNRNP48 PE=4 SV=1 - [C9J1U1_HUMAN]  |
| B4DDC7 | Uncharacterized protein OS=Homo sapiens GN=SNRPA PE=2 SV=1 - [B4DDC7_HUMAN]    |
| B4DJI7 | Uncharacterized protein OS=Homo sapiens GN=SNX11 PE=2 SV=1 - [B4DJI7_HUMAN]    |
| E5RGS8 | Uncharacterized protein OS=Homo sapiens GN=SNX16 PE=4 SV=1 - [E5RGS8_HUMAN]    |
| B4DEK4 | Uncharacterized protein OS=Homo sapiens GN=SNX2 PE=2 SV=1 - [B4DEK4_HUMAN]     |
| E9PBC7 | Uncharacterized protein OS=Homo sapiens GN=SNX5 PE=4 SV=1 - [E9PBC7_HUMAN]     |
| F5H3C5 | Uncharacterized protein OS=Homo sapiens GN=SOD2 PE=3 SV=1 - [F5H3C5_HUMAN]     |
| F5H7U6 | Uncharacterized protein OS=Homo sapiens GN=SPAG9 PE=4 SV=1 - [F5H7U6_HUMAN]    |
| A8MV89 | Uncharacterized protein OS=Homo sapiens GN=SPECC1 PE=4 SV=1 - [A8MV89_HUMAN]   |
| B4DGT1 | Uncharacterized protein OS=Homo sapiens GN=SPTAN1 PE=2 SV=1 - [B4DGT1_HUMAN]   |
| B4DHX0 | Uncharacterized protein OS=Homo sapiens GN=SQLE PE=2 SV=1 - [B4DHX0_HUMAN]     |
| F5H281 | Uncharacterized protein OS=Homo sapiens GN=SRP68 PE=4 SV=1 - [F5H281_HUMAN]    |
| B4DED5 | Uncharacterized protein OS=Homo sapiens GN=SRRM1 PE=2 SV=1 - [B4DED5_HUMAN]    |
| E7EMJ8 | Uncharacterized protein OS=Homo sapiens GN=SRSF4 PE=4 SV=2 - [E7EMJ8_HUMAN]    |
| A6NNE8 | Uncharacterized protein OS=Homo sapiens GN=SRSF7 PE=4 SV=3 - [A6NNE8_HUMAN]    |
| C9K0U8 | Uncharacterized protein OS=Homo sapiens GN=SSBP1 PE=4 SV=1 - [C9K0U8_HUMAN]    |
| A6NMU3 | Uncharacterized protein OS=Homo sapiens GN=STAM PE=4 SV=1 - [A6NMU3_HUMAN]     |
| B4E2V5 | Uncharacterized protein OS=Homo sapiens GN=STOM PE=2 SV=1 - [B4E2V5_HUMAN]     |
| B4E1K7 | Uncharacterized protein OS=Homo sapiens GN=STOML2 PE=2 SV=1 - [B4E1K7_HUMAN]   |
| B4DQH7 | Uncharacterized protein OS=Homo sapiens GN=STRN4 PE=2 SV=1 - [B4DQH7_HUMAN]    |
| D6RF48 | Uncharacterized protein OS=Homo sapiens GN=STX18 PE=4 SV=1 - [D6RF48_HUMAN]    |
| F5GXG3 | Uncharacterized protein OS=Homo sapiens GN=STXBP2 PE=4 SV=1 - [F5GXG3_HUMAN]   |
| F5GXC8 | Uncharacterized protein OS=Homo sapiens GN=SUCLA2 PE=3 SV=1 - [F5GXC8_HUMAN]   |
| F2Z3D0 | Uncharacterized protein OS=Homo sapiens GN=SUMO2 PE=4 SV=1 - [F2Z3D0_HUMAN]    |
| E7ENN3 | Uncharacterized protein OS=Homo sapiens GN=SYNE1 PE=4 SV=1 - [E7ENN3_HUMAN]    |
| C9JYN0 | Uncharacterized protein OS=Homo sapiens GN=SYPL1 PE=4 SV=1 - [C9JYN0_HUMAN]    |
| B4DIR9 | Uncharacterized protein OS=Homo sapiens GN=TAB2 PE=2 SV=1 - [B4DIR9_HUMAN]     |
| F5GWQ7 | Uncharacterized protein OS=Homo sapiens GN=TAF15 PE=4 SV=1 - [F5GWQ7_HUMAN]    |
| E7ERI3 | Uncharacterized protein OS=Homo sapiens GN=TARS PE=3 SV=1 - [E7ERI3_HUMAN]     |
| F5GXK4 | Uncharacterized protein OS=Homo sapiens GN=TBC1D14 PE=4 SV=1 - [F5GXK4_HUMAN]  |
| A8MVD5 | Uncharacterized protein OS=Homo sapiens GN=TBCB PE=4 SV=1 - [A8MVD5_HUMAN]     |
| E9PSI4 | Uncharacterized protein OS=Homo sapiens GN=TBCEL PE=4 SV=1 - [E9PSI4_HUMAN]    |
| E9PMC5 | Uncharacterized protein OS=Homo sapiens GN=TCIRG1 PE=4 SV=1 - [E9PMC5_HUMAN]   |
| C9JJP5 | Uncharacterized protein OS=Homo sapiens GN=TFG PE=4 SV=1 - [C9JJP5_HUMAN]      |
| B4DIT7 | Uncharacterized protein OS=Homo sapiens GN=TGM2 PE=2 SV=1 - [B4DIT7_HUMAN]     |
| B5MDZ2 | Uncharacterized protein OS=Homo sapiens GN=THOC7 PE=4 SV=1 - [B5MDZ2_HUMAN]    |
| E9PQZ7 | Uncharacterized protein OS=Homo sapiens GN=TM7SF2 PE=4 SV=1 - [E9PQZ7_HUMAN]   |
| F5H587 | Uncharacterized protein OS=Homo sapiens GN=TM7SF3 PE=4 SV=1 - [F5H587_HUMAN]   |
| C9JAP5 | Uncharacterized protein OS=Homo sapiens GN=TMBIM1 PE=4 SV=1 - [C9JAP5_HUMAN]   |
| A6NJCO | Uncharacterized protein OS=Homo sapiens GN=TMCC2 PE=4 SV=2 - [A6NJCO_HUMAN]    |
| F5GX39 | Uncharacterized protein OS=Homo sapiens GN=TMED2 PE=3 SV=1 - [F5GX39_HUMAN]    |
| C9JUN6 | Uncharacterized protein OS=Homo sapiens GN=TMED4 PE=3 SV=1 - [C9JUN6_HUMAN]    |
| E9PI90 | Uncharacterized protein OS=Homo sapiens GN=TMEM126A PE=4 SV=1 - [E9PI90_HUMAN] |
| B4DMG2 | Uncharacterized protein OS=Homo sapiens GN=TMEM131 PE=2 SV=1 - [B4DMG2_HUMAN]  |
| F2Z329 | Uncharacterized protein OS=Homo sapiens GN=TMEM237 PE=4 SV=1 - [F2Z329_HUMAN]  |
| D6RAA6 | Uncharacterized protein OS=Homo sapiens GN=TMEM33 PE=4 SV=1 - [D6RAA6_HUMAN]   |
| F5H4F7 | Uncharacterized protein OS=Homo sapiens GN=TMX3 PE=4 SV=1 - [F5H4F7_HUMAN]     |
| E9PNS3 | Uncharacterized protein OS=Homo sapiens GN=TOLLIP PE=4 SV=1 - [E9PNS3_HUMAN]   |
| E7EPD0 | Uncharacterized protein OS=Homo sapiens GN=TOM1 PE=4 SV=1 - [E7EPD0_HUMAN]     |
| F5GXH5 | Uncharacterized protein OS=Homo sapiens GN=TOM1L2 PE=4 SV=1 - [F5GXH5_HUMAN]   |
| B4DZ87 | Uncharacterized protein OS=Homo sapiens GN=TOMM70A PE=2 SV=1 - [B4DZ87_HUMAN]  |
| F5H7S3 | Uncharacterized protein OS=Homo sapiens GN=TPM1 PE=3 SV=1 - [F5H7S3_HUMAN]     |

|        |                                                                              |
|--------|------------------------------------------------------------------------------|
| B4DSE2 | Uncharacterized protein OS=Homo sapiens GN=TPP1 PE=2 SV=1 - [B4DSE2_HUMAN]   |
| E7EQD1 | Uncharacterized protein OS=Homo sapiens GN=TRA2B PE=4 SV=1 - [E7EQD1_HUMAN]  |
| B7WP88 | Uncharacterized protein OS=Homo sapiens GN=TRANK1 PE=4 SV=2 - [B7WP88_HUMAN] |
| F5H897 | Uncharacterized protein OS=Homo sapiens GN=TRAP1 PE=3 SV=1 - [F5H897_HUMAN]  |
| F5H012 | Uncharacterized protein OS=Homo sapiens GN=TRIM21 PE=4 SV=1 - [F5H012_HUMAN] |
| C9JNQ0 | Uncharacterized protein OS=Homo sapiens GN=TRIM6 PE=4 SV=1 - [C9JNQ0_HUMAN]  |
| C9JFG4 | Uncharacterized protein OS=Homo sapiens GN=TRIOBP PE=4 SV=1 - [C9JFG4_HUMAN] |
| E9PFY7 | Uncharacterized protein OS=Homo sapiens GN=TRMT11 PE=4 SV=1 - [E9PFY7_HUMAN] |
| B7Z897 | Uncharacterized protein OS=Homo sapiens GN=TSC1 PE=2 SV=1 - [B7Z897_HUMAN]   |
| E9PGT1 | Uncharacterized protein OS=Homo sapiens GN=TSN PE=4 SV=1 - [E9PGT1_HUMAN]    |
| E9PLH9 | Uncharacterized protein OS=Homo sapiens GN=TSTA3 PE=4 SV=1 - [E9PLH9_HUMAN]  |
| D6RCE2 | Uncharacterized protein OS=Homo sapiens GN=TTC37 PE=4 SV=1 - [D6RCE2_HUMAN]  |
| B5MDV0 | Uncharacterized protein OS=Homo sapiens GN=TLL8 PE=4 SV=2 - [B5MDV0_HUMAN]   |
| D6RDV0 | Uncharacterized protein OS=Homo sapiens GN=TUSC3 PE=4 SV=1 - [D6RDV0_HUMAN]  |
| B8ZZX4 | Uncharacterized protein OS=Homo sapiens GN=TXNDC9 PE=4 SV=1 - [B8ZZX4_HUMAN] |
| E9PRI8 | Uncharacterized protein OS=Homo sapiens GN=TXNRD1 PE=4 SV=1 - [E9PRI8_HUMAN] |
| F6WBI2 | Uncharacterized protein OS=Homo sapiens GN=TXNRD2 PE=4 SV=1 - [F6WBI2_HUMAN] |
| C9JGI3 | Uncharacterized protein OS=Homo sapiens GN=TYMP PE=4 SV=1 - [C9JGI3_HUMAN]   |
| E7EW00 | Uncharacterized protein OS=Homo sapiens GN=U2SURP PE=4 SV=1 - [E7EW00_HUMAN] |
| C9JD99 | Uncharacterized protein OS=Homo sapiens GN=UBAP2L PE=4 SV=2 - [C9JD99_HUMAN] |
| F5H265 | Uncharacterized protein OS=Homo sapiens GN=UBC PE=4 SV=1 - [F5H265_HUMAN]    |
| F5H6D6 | Uncharacterized protein OS=Homo sapiens GN=UBE3B PE=4 SV=1 - [F5H6D6_HUMAN]  |
| B7Z7P0 | Uncharacterized protein OS=Homo sapiens GN=UBE4A PE=2 SV=1 - [B7Z7P0_HUMAN]  |
| F5H2G2 | Uncharacterized protein OS=Homo sapiens GN=UBQLN2 PE=4 SV=1 - [F5H2G2_HUMAN] |
| E7EMW7 | Uncharacterized protein OS=Homo sapiens GN=UBR5 PE=4 SV=1 - [E7EMW7_HUMAN]   |
| E9PJ81 | Uncharacterized protein OS=Homo sapiens GN=UBXN1 PE=4 SV=1 - [E9PJ81_HUMAN]  |
| E9PGR0 | Uncharacterized protein OS=Homo sapiens GN=UCHL5 PE=4 SV=1 - [E9PGR0_HUMAN]  |
| C9JNP9 | Uncharacterized protein OS=Homo sapiens GN=UFD1L PE=4 SV=1 - [C9JNP9_HUMAN]  |
| C9JKD6 | Uncharacterized protein OS=Homo sapiens GN=UGP2 PE=4 SV=1 - [C9JKD6_HUMAN]   |
| F5H4C5 | Uncharacterized protein OS=Homo sapiens GN=UQCC PE=4 SV=1 - [F5H4C5_HUMAN]   |
| E5RHG9 | Uncharacterized protein OS=Homo sapiens GN=UQCRB PE=4 SV=1 - [E5RHG9_HUMAN]  |
| F5GZ76 | Uncharacterized protein OS=Homo sapiens GN=USO1 PE=4 SV=1 - [F5GZ76_HUMAN]   |
| B7Z7T5 | Uncharacterized protein OS=Homo sapiens GN=USP7 PE=2 SV=1 - [B7Z7T5_HUMAN]   |
| B0V043 | Uncharacterized protein OS=Homo sapiens GN=VAR5 PE=3 SV=1 - [B0V043_HUMAN]   |
| F5H2A7 | Uncharacterized protein OS=Homo sapiens GN=VBP1 PE=4 SV=1 - [F5H2A7_HUMAN]   |
| F5H7T3 | Uncharacterized protein OS=Homo sapiens GN=VCL PE=4 SV=1 - [F5H7T3_HUMAN]    |
| F5GZG8 | Uncharacterized protein OS=Homo sapiens GN=VPS13C PE=4 SV=1 - [F5GZG8_HUMAN] |
| E7ETQ7 | Uncharacterized protein OS=Homo sapiens GN=VTA1 PE=4 SV=2 - [E7ETQ7_HUMAN]   |
| F5H721 | Uncharacterized protein OS=Homo sapiens GN=WBP11 PE=4 SV=1 - [F5H721_HUMAN]  |
| E7EX86 | Uncharacterized protein OS=Homo sapiens GN=WBP2 PE=4 SV=1 - [E7EX86_HUMAN]   |
| Q9H8N9 | Uncharacterized protein OS=Homo sapiens GN=WDFY1 PE=2 SV=1 - [Q9H8N9_HUMAN]  |
| B4DP38 | Uncharacterized protein OS=Homo sapiens GN=WDR77 PE=2 SV=1 - [B4DP38_HUMAN]  |
| B7Z6V3 | Uncharacterized protein OS=Homo sapiens GN=WDR81 PE=2 SV=1 - [B7Z6V3_HUMAN]  |
| E9PRI3 | Uncharacterized protein OS=Homo sapiens GN=WEE1 PE=4 SV=1 - [E9PRI3_HUMAN]   |
| F5GWT4 | Uncharacterized protein OS=Homo sapiens GN=WNK1 PE=4 SV=1 - [F5GWT4_HUMAN]   |
| C9J673 | Uncharacterized protein OS=Homo sapiens GN=XPO1 PE=4 SV=1 - [C9J673_HUMAN]   |
| E7ESC6 | Uncharacterized protein OS=Homo sapiens GN=XPO7 PE=4 SV=1 - [E7ESC6_HUMAN]   |
| B1AHC7 | Uncharacterized protein OS=Homo sapiens GN=XRCC6 PE=4 SV=1 - [B1AHC7_HUMAN]  |
| F5H3P9 | Uncharacterized protein OS=Homo sapiens GN=YIPF5 PE=4 SV=1 - [F5H3P9_HUMAN]  |
| F5GYR4 | Uncharacterized protein OS=Homo sapiens GN=YME1L1 PE=3 SV=1 - [F5GYR4_HUMAN] |
| E9PJX1 | Uncharacterized protein OS=Homo sapiens GN=ZFPL1 PE=4 SV=1 - [E9PJX1_HUMAN]  |
| Q8N8Y4 | Uncharacterized protein OS=Homo sapiens GN=ZNF7 PE=2 SV=1 - [Q8N8Y4_HUMAN]   |
| A1A528 | Uncharacterized protein OS=Homo sapiens GN=ZW10 PE=2 SV=1 - [A1A528_HUMAN]   |
| Q6ZRU8 | Uncharacterized protein OS=Homo sapiens PE=2 SV=1 - [Q6ZRU8_HUMAN]           |
| Q6ZTQ9 | Uncharacterized protein OS=Homo sapiens PE=2 SV=1 - [Q6ZTQ9_HUMAN]           |
| C9IY82 | Uncharacterized protein OS=Homo sapiens PE=3 SV=1 - [C9IY82_HUMAN]           |

|        |                                                                                                                    |
|--------|--------------------------------------------------------------------------------------------------------------------|
| F5H167 | Uncharacterized protein OS=Homo sapiens PE=3 SV=1 - [F5H167_HUMAN]                                                 |
| A8MZD0 | Uncharacterized protein OS=Homo sapiens PE=4 SV=1 - [A8MZD0_HUMAN]                                                 |
| E9PGW4 | Uncharacterized protein OS=Homo sapiens PE=4 SV=1 - [E9PGW4_HUMAN]                                                 |
| F5GYQ0 | Uncharacterized protein OS=Homo sapiens PE=4 SV=1 - [F5GYQ0_HUMAN]                                                 |
| F5H3W8 | Uncharacterized protein OS=Homo sapiens PE=4 SV=1 - [F5H3W8_HUMAN]                                                 |
| F6WSP1 | Uncharacterized protein OS=Homo sapiens PE=4 SV=1 - [F6WSP1_HUMAN]                                                 |
| C9J8M8 | Uncharacterized protein OS=Homo sapiens PE=4 SV=2 - [C9J8M8_HUMAN]                                                 |
| C9JH24 | Uncharacterized protein OS=Homo sapiens PE=4 SV=2 - [C9JH24_HUMAN]                                                 |
| C4AM82 | Uncharacterized protein OS=Homo sapiens PE=4 SV=3 - [C4AM82_HUMAN]                                                 |
| Q8WUR7 | UPF0235 protein C15orf40 OS=Homo sapiens GN=C15orf40 PE=1 SV=1 - [C0040_HUMAN]                                     |
| Q9H1C7 | UPF0467 protein C5orf32 OS=Homo sapiens GN=C5orf32 PE=2 SV=1 - [CE032_HUMAN]                                       |
| Q969H8 | UPF0556 protein C19orf10 OS=Homo sapiens GN=C19orf10 PE=1 SV=1 - [CS010_HUMAN]                                     |
| Q9Y224 | UPF0568 protein C14orf166 OS=Homo sapiens GN=C14orf166 PE=1 SV=1 - [CN166_HUMAN]                                   |
| Q9HCM3 | UPF0606 protein KIAA1549 OS=Homo sapiens GN=KIAA1549 PE=1 SV=4 - [K1549_HUMAN]                                     |
| Q8IV36 | UPF0663 transmembrane protein C17orf28 OS=Homo sapiens GN=C17orf28 PE=1 SV=1 - [CQ028_HUMAN]                       |
| Q8WUY1 | UPF0670 protein C8orf55 OS=Homo sapiens GN=C8orf55 PE=1 SV=2 - [CH055_HUMAN]                                       |
| Q9BSF0 | UPF0733 protein C2orf88 OS=Homo sapiens GN=C2orf88 PE=2 SV=2 - [CB088_HUMAN]                                       |
| Q13336 | Urea transporter 1 OS=Homo sapiens GN=SLC14A1 PE=2 SV=2 - [UT1_HUMAN]                                              |
| Q92738 | USP6 N-terminal-like protein OS=Homo sapiens GN=USP6NL PE=1 SV=3 - [US6NL_HUMAN]                                   |
| P54725 | UV excision repair protein RAD23 homolog A OS=Homo sapiens GN=RAD23A PE=1 SV=1 - [RD23A_HUMAN]                     |
| P54727 | UV excision repair protein RAD23 homolog B OS=Homo sapiens GN=RAD23B PE=1 SV=1 - [RD23B_HUMAN]                     |
| Q9H270 | Vacuolar protein sorting-associated protein 11 homolog OS=Homo sapiens GN=VPS11 PE=1 SV=1 - [VPS11_HUMAN]          |
| Q96RL7 | Vacuolar protein sorting-associated protein 13A OS=Homo sapiens GN=VPS13A PE=1 SV=2 - [VP13A_HUMAN]                |
| Q9P253 | Vacuolar protein sorting-associated protein 18 homolog OS=Homo sapiens GN=VPS18 PE=1 SV=2 - [VPS18_HUMAN]          |
| Q9UBQ0 | Vacuolar protein sorting-associated protein 29 OS=Homo sapiens GN=VPS29 PE=1 SV=1 - [VPS29_HUMAN]                  |
| Q96QK1 | Vacuolar protein sorting-associated protein 35 OS=Homo sapiens GN=VPS35 PE=1 SV=2 - [VPS35_HUMAN]                  |
| Q9BRG1 | Vacuolar protein-sorting-associated protein 25 OS=Homo sapiens GN=VPS25 PE=1 SV=1 - [VPS25_HUMAN]                  |
| P50552 | Vasodilator-stimulated phosphoprotein OS=Homo sapiens GN=VASP PE=1 SV=3 - [VASP_HUMAN]                             |
| P49748 | Very long-chain specific acyl-CoA dehydrogenase, mitochondrial OS=Homo sapiens GN=ACADVL PE=1 SV=1 - [ACADV_HUMAN] |
| Q12981 | Vesicle transport protein SEC20 OS=Homo sapiens GN=BNIP1 PE=1 SV=3 - [SEC20_HUMAN]                                 |
| Q9NZ43 | Vesicle transport protein USE1 OS=Homo sapiens GN=USE1 PE=1 SV=2 - [USE1_HUMAN]                                    |
| Q9UEU0 | Vesicle transport through interaction with t-SNAREs homolog 1B OS=Homo sapiens GN=VTI1B PE=1 SV=3 - [VTI1B_HUMAN]  |
| Q15836 | Vesicle-associated membrane protein 3 OS=Homo sapiens GN=VAMP3 PE=1 SV=3 - [VAMP3_HUMAN]                           |
| P51809 | Vesicle-associated membrane protein 7 OS=Homo sapiens GN=VAMP7 PE=1 SV=3 - [VAMP7_HUMAN]                           |
| Q9POL0 | Vesicle-associated membrane protein-associated protein A OS=Homo sapiens GN=VAPA PE=1 SV=3 - [VAPA_HUMAN]          |
| Q95292 | Vesicle-associated membrane protein-associated protein B/C OS=Homo sapiens GN=VAPB PE=1 SV=3 - [VAPB_HUMAN]        |
| P46459 | Vesicle-fusing ATPase OS=Homo sapiens GN=NSF PE=1 SV=3 - [NSF_HUMAN]                                               |
| O75396 | Vesicle-trafficking protein SEC22b OS=Homo sapiens GN=SEC22B PE=1 SV=4 - [SC22B_HUMAN]                             |
| P21796 | Voltage-dependent anion-selective channel protein 1 OS=Homo sapiens GN=VDAC1 PE=1 SV=2 - [VDAC1_HUMAN]             |
| P45880 | Voltage-dependent anion-selective channel protein 2 OS=Homo sapiens GN=VDAC2 PE=1 SV=2 - [VDAC2_HUMAN]             |
| Q9Y277 | Voltage-dependent anion-selective channel protein 3 OS=Homo sapiens GN=VDAC3 PE=1 SV=1 - [VDAC3_HUMAN]             |
| P21281 | V-type proton ATPase subunit B, brain isoform OS=Homo sapiens GN=ATP6V1B2 PE=1 SV=3 - [VATB2_HUMAN]                |
| P61421 | V-type proton ATPase subunit d 1 OS=Homo sapiens GN=ATP6V0D1 PE=1 SV=1 - [VA0D1_HUMAN]                             |
| Q9Y5K8 | V-type proton ATPase subunit D OS=Homo sapiens GN=ATP6V1D PE=1 SV=1 - [VATD_HUMAN]                                 |
| Q16864 | V-type proton ATPase subunit F OS=Homo sapiens GN=ATP6V1F PE=1 SV=2 - [VATF_HUMAN]                                 |
| O75348 | V-type proton ATPase subunit G 1 OS=Homo sapiens GN=ATP6V1G1 PE=1 SV=3 - [VATG1_HUMAN]                             |
| Q9BZH6 | WD repeat-containing protein 11 OS=Homo sapiens GN=WDR11 PE=1 SV=1 - [WDR11_HUMAN]                                 |
| Q6ZMY6 | WD repeat-containing protein 88 OS=Homo sapiens GN=WDR88 PE=2 SV=2 - [WDR88_HUMAN]                                 |
| A4D1P6 | WD repeat-containing protein 91 OS=Homo sapiens GN=WDR91 PE=1 SV=2 - [WDR91_HUMAN]                                 |
| Q2TAY7 | WD40 repeat-containing protein SMU1 OS=Homo sapiens GN=SMU1 PE=1 SV=2 - [SMU1_HUMAN]                               |
| P13010 | X-ray repair cross-complementing protein 5 OS=Homo sapiens GN=XRCC5 PE=1 SV=3 - [XRCC5_HUMAN]                      |
| Q86Y38 | Xylosyltransferase 1 OS=Homo sapiens GN=XYLT1 PE=1 SV=1 - [XYLT1_HUMAN]                                            |
| Q9P1Z0 | Zinc finger and BTB domain-containing protein 4 OS=Homo sapiens GN=ZBTB4 PE=1 SV=3 - [ZBTB4_HUMAN]                 |
| Q7Z2W4 | Zinc finger CCCH-type antiviral protein 1 OS=Homo sapiens GN=ZC3HAV1 PE=1 SV=3 - [ZCCHV_HUMAN]                     |
| Q86UP3 | Zinc finger homeobox protein 4 OS=Homo sapiens GN=ZFHX4 PE=1 SV=1 - [ZFHX4_HUMAN]                                  |
| Q96NC0 | Zinc finger matrin-type protein 2 OS=Homo sapiens GN=ZMAT2 PE=1 SV=1 - [ZMAT2_HUMAN]                               |

|        |                                                                                          |
|--------|------------------------------------------------------------------------------------------|
| Q9ULJ3 | Zinc finger protein 295 OS=Homo sapiens GN=ZNF295 PE=1 SV=2 - [ZN295_HUMAN]              |
| P15822 | Zinc finger protein 40 OS=Homo sapiens GN=HIVEP1 PE=1 SV=3 - [ZEP1_HUMAN]                |
| Q9C0G0 | Zinc finger protein 407 OS=Homo sapiens GN=ZNF407 PE=2 SV=2 - [ZN407_HUMAN]              |
| Q09FC8 | Zinc finger protein 415 OS=Homo sapiens GN=ZNF415 PE=2 SV=2 - [ZN415_HUMAN]              |
| Q7Z3V5 | Zinc finger protein 571 OS=Homo sapiens GN=ZNF571 PE=2 SV=3 - [ZN571_HUMAN]              |
| Q5T619 | Zinc finger protein 648 OS=Homo sapiens GN=ZNF648 PE=1 SV=1 - [ZN648_HUMAN]              |
| Q5JPB2 | Zinc finger protein 831 OS=Homo sapiens GN=ZNF831 PE=2 SV=4 - [ZN831_HUMAN]              |
| C9JN71 | Zinc finger protein 878 OS=Homo sapiens GN=ZNF878 PE=3 SV=2 - [ZN878_HUMAN]              |
| A8MXY4 | Zinc finger protein 99 OS=Homo sapiens GN=ZNF99 PE=2 SV=2 - [ZNF99_HUMAN]                |
| Q86YF9 | Zinc finger protein DZIP1 OS=Homo sapiens GN=DZIP1 PE=1 SV=1 - [DZIP1_HUMAN]             |
| Q9Y6M5 | Zinc transporter 1 OS=Homo sapiens GN=SLC30A1 PE=1 SV=3 - [ZNT1_HUMAN]                   |
| Q401N2 | Zinc-activated ligand-gated ion channel OS=Homo sapiens GN=ZACN PE=1 SV=2 - [ZACN_HUMAN] |

**Supplemental Table 2B. Proteins detected in the cytosol fraction of Human RBCs.**

| Accession     | Description                                                                                                |
|---------------|------------------------------------------------------------------------------------------------------------|
| Q9BV57        | 1,2-dihydroxy-3-keto-5-methylthiopentene dioxygenase OS=Homo sapiens GN=ADI1 PE=1 SV=1 - [MTND_HUMAN]      |
| Q9NRX4        | 14 kDa phosphohistidine phosphatase OS=Homo sapiens GN=PHPT1 PE=1 SV=1 - [PHP14_HUMAN]                     |
| P31946        | 14-3-3 protein beta/alpha OS=Homo sapiens GN=YWHAB PE=1 SV=3 - [1433B_HUMAN]                               |
| P62258        | 14-3-3 protein epsilon OS=Homo sapiens GN=YWHAE PE=1 SV=1 - [1433E_HUMAN]                                  |
| Q04917        | 14-3-3 protein eta OS=Homo sapiens GN=YWHAH PE=1 SV=4 - [1433F_HUMAN]                                      |
| <i>P61981</i> | <i>14-3-3 protein gamma OS=Homo sapiens GN=YWHAG PE=1 SV=2 - [1433G_HUMAN]</i>                             |
| <i>P27348</i> | <i>14-3-3 protein theta OS=Homo sapiens GN=YWHAQ PE=1 SV=1 - [1433T_HUMAN]</i>                             |
| P63104        | 14-3-3 protein zeta/delta OS=Homo sapiens GN=YWHAZ PE=1 SV=1 - [1433Z_HUMAN]                               |
| Q9BPX1        | 17-beta-hydroxysteroid dehydrogenase 14 OS=Homo sapiens GN=HSD17B14 PE=1 SV=1 - [DHB14_HUMAN]              |
| P09543        | 2',3'-cyclic-nucleotide 3'-phosphodiesterase OS=Homo sapiens GN=CNP PE=1 SV=2 - [CN37_HUMAN]               |
| P62333        | 26S protease regulatory subunit 10B OS=Homo sapiens GN=PSMC6 PE=1 SV=1 - [PRS10_HUMAN]                     |
| <i>P62191</i> | <i>26S protease regulatory subunit 4 OS=Homo sapiens GN=PSMC1 PE=1 SV=1 - [PRS4_HUMAN]</i>                 |
| P17980        | 26S protease regulatory subunit 6A OS=Homo sapiens GN=PSMC3 PE=1 SV=3 - [PRS6A_HUMAN]                      |
| P43686        | 26S protease regulatory subunit 6B OS=Homo sapiens GN=PSMC4 PE=1 SV=2 - [PRS6B_HUMAN]                      |
| P35998        | 26S protease regulatory subunit 7 OS=Homo sapiens GN=PSMC2 PE=1 SV=3 - [PRS7_HUMAN]                        |
| Q99460        | 26S proteasome non-ATPase regulatory subunit 1 OS=Homo sapiens GN=PSMD1 PE=1 SV=2 - [PSMD1_HUMAN]          |
| O00231        | 26S proteasome non-ATPase regulatory subunit 11 OS=Homo sapiens GN=PSMD11 PE=1 SV=3 - [PSD11_HUMAN]        |
| <i>O00232</i> | <i>26S proteasome non-ATPase regulatory subunit 12 OS=Homo sapiens GN=PSMD12 PE=1 SV=3 - [PSD12_HUMAN]</i> |
| Q9UNM6        | 26S proteasome non-ATPase regulatory subunit 13 OS=Homo sapiens GN=PSMD13 PE=1 SV=2 - [PSD13_HUMAN]        |
| O00487        | 26S proteasome non-ATPase regulatory subunit 14 OS=Homo sapiens GN=PSMD14 PE=1 SV=1 - [PSDE_HUMAN]         |
| P55036        | 26S proteasome non-ATPase regulatory subunit 4 OS=Homo sapiens GN=PSMD4 PE=1 SV=1 - [PSMD4_HUMAN]          |
| P48556        | 26S proteasome non-ATPase regulatory subunit 8 OS=Homo sapiens GN=PSMD8 PE=1 SV=2 - [PSMD8_HUMAN]          |
| O00233        | 26S proteasome non-ATPase regulatory subunit 9 OS=Homo sapiens GN=PSMD9 PE=1 SV=3 - [PSMD9_HUMAN]          |
| Q13442        | 28 kDa heat- and acid-stable phosphoprotein OS=Homo sapiens GN=PDAP1 PE=1 SV=1 - [HAP28_HUMAN]             |
| P82664        | 28S ribosomal protein S10, mitochondrial OS=Homo sapiens GN=MRPS10 PE=1 SV=2 - [RT10_HUMAN]                |
| P25325        | 3-mercaptopyruvate sulfurtransferase OS=Homo sapiens GN=MPST PE=1 SV=3 - [THTM_HUMAN]                      |
| Q96RE3        | 36 kDa muscleblind protein EXP36 OS=Homo sapiens GN=MBNL1 PE=2 SV=1 - [Q96RE3_HUMAN]                       |
| Q9BRJ2        | 39S ribosomal protein L45, mitochondrial OS=Homo sapiens GN=MRPL45 PE=1 SV=2 - [RM45_HUMAN]                |
| P49189        | 4-trimethylaminobutyraldehyde dehydrogenase OS=Homo sapiens GN=ALDH9A1 PE=1 SV=3 - [AL9A1_HUMAN]           |
| P46783        | 40S ribosomal protein S10 OS=Homo sapiens GN=RPS10 PE=1 SV=1 - [RS10_HUMAN]                                |
| P62280        | 40S ribosomal protein S11 OS=Homo sapiens GN=RPS11 PE=1 SV=3 - [RS11_HUMAN]                                |
| P25398        | 40S ribosomal protein S12 OS=Homo sapiens GN=RPS12 PE=1 SV=3 - [RS12_HUMAN]                                |
| P62841        | 40S ribosomal protein S15 OS=Homo sapiens GN=RPS15 PE=1 SV=2 - [RS15_HUMAN]                                |
| P62244        | 40S ribosomal protein S15a OS=Homo sapiens GN=RPS15A PE=1 SV=2 - [RS15A_HUMAN]                             |
| P62249        | 40S ribosomal protein S16 OS=Homo sapiens GN=RPS16 PE=1 SV=2 - [RS16_HUMAN]                                |
| P0CW22        | 40S ribosomal protein S17-like OS=Homo sapiens GN=RPS17L PE=3 SV=1 - [RS17L_HUMAN]                         |
| P62269        | 40S ribosomal protein S18 OS=Homo sapiens GN=RPS18 PE=1 SV=3 - [RS18_HUMAN]                                |
| P39019        | 40S ribosomal protein S19 OS=Homo sapiens GN=RPS19 PE=1 SV=2 - [RS19_HUMAN]                                |
| P60866        | 40S ribosomal protein S20 OS=Homo sapiens GN=RPS20 PE=1 SV=1 - [RS20_HUMAN]                                |
| Q8WVC2        | 40S ribosomal protein S21 OS=Homo sapiens GN=RPS21 PE=2 SV=1 - [Q8WVC2_HUMAN]                              |
| P62851        | 40S ribosomal protein S25 OS=Homo sapiens GN=RPS25 PE=1 SV=1 - [RS25_HUMAN]                                |
| P62854        | 40S ribosomal protein S26 OS=Homo sapiens GN=RPS26 PE=1 SV=3 - [RS26_HUMAN]                                |
| P62857        | 40S ribosomal protein S28 OS=Homo sapiens GN=RPS28 PE=1 SV=1 - [RS28_HUMAN]                                |

|               |                                                                                                               |
|---------------|---------------------------------------------------------------------------------------------------------------|
| P62273        | 40S ribosomal protein S29 OS=Homo sapiens GN=RPS29 PE=1 SV=2 - [RS29_HUMAN]                                   |
| <i>P23396</i> | <i>40S ribosomal protein S3 OS=Homo sapiens GN=RPS3 PE=1 SV=2 - [RS3_HUMAN]</i>                               |
| P62701        | 40S ribosomal protein S4, X isoform OS=Homo sapiens GN=RPS4X PE=1 SV=2 - [RS4X_HUMAN]                         |
| P46782        | 40S ribosomal protein S5 OS=Homo sapiens GN=RPS5 PE=1 SV=4 - [RS5_HUMAN]                                      |
| <i>P62753</i> | <i>40S ribosomal protein S6 OS=Homo sapiens GN=RPS6 PE=1 SV=1 - [RS6_HUMAN]</i>                               |
| P62081        | 40S ribosomal protein S7 OS=Homo sapiens GN=RPS7 PE=1 SV=1 - [RS7_HUMAN]                                      |
| P46781        | 40S ribosomal protein S9 OS=Homo sapiens GN=RPS9 PE=1 SV=3 - [RS9_HUMAN]                                      |
| Q9UPN4        | 5-azacytidine-induced protein 1 OS=Homo sapiens GN=AZI1 PE=1 SV=3 - [AZI1_HUMAN]                              |
| Q13131        | 5'-AMP-activated protein kinase catalytic subunit alpha-1 OS=Homo sapiens GN=PRKAA1 PE=1 SV=4 - [AAPK1_HUMAN] |
| Q5TFE4        | 5'-nucleotidase domain-containing protein 1 OS=Homo sapiens GN=NT5DC1 PE=1 SV=1 - [NT5D1_HUMAN]               |
| Q5JUV3        | 5'-nucleotidase, cytosolic II (Fragment) OS=Homo sapiens GN=NT5C2 PE=2 SV=1 - [Q5JUV3_HUMAN]                  |
| Q8TCD5        | 5'(3')-deoxyribonucleotidase, cytosolic type OS=Homo sapiens GN=NT5C PE=1 SV=2 - [NT5C_HUMAN]                 |
| Q01813        | 6-phosphofructokinase type C OS=Homo sapiens GN=PFKP PE=1 SV=2 - [K6PP_HUMAN]                                 |
| P17858        | 6-phosphofructokinase, liver type OS=Homo sapiens GN=PFKL PE=1 SV=6 - [K6PL_HUMAN]                            |
| <i>P08237</i> | <i>6-phosphofructokinase, muscle type OS=Homo sapiens GN=PFKM PE=1 SV=2 - [K6PF_HUMAN]</i>                    |
| <i>F5H7U0</i> | <i>6-phosphogluconate dehydrogenase, decarboxylating OS=Homo sapiens GN=PGD PE=3 SV=1 - [F5H7U0_HUMAN]</i>    |
| O95336        | 6-phosphogluconolactonase OS=Homo sapiens GN=PGLS PE=1 SV=2 - [6PGL_HUMAN]                                    |
| P05388        | 60S acidic ribosomal protein P0 OS=Homo sapiens GN=RPLP0 PE=1 SV=1 - [RLA0_HUMAN]                             |
| P05387        | 60S acidic ribosomal protein P2 OS=Homo sapiens GN=RPLP2 PE=1 SV=1 - [RLA2_HUMAN]                             |
| P62906        | 60S ribosomal protein L10a OS=Homo sapiens GN=RPL10A PE=1 SV=2 - [RL10A_HUMAN]                                |
| P30050        | 60S ribosomal protein L12 OS=Homo sapiens GN=RPL12 PE=1 SV=1 - [RL12_HUMAN]                                   |
| P26373        | 60S ribosomal protein L13 OS=Homo sapiens GN=RPL13 PE=1 SV=4 - [RL13_HUMAN]                                   |
| P40429        | 60S ribosomal protein L13a OS=Homo sapiens GN=RPL13A PE=1 SV=2 - [RL13A_HUMAN]                                |
| P18621        | 60S ribosomal protein L17 OS=Homo sapiens GN=RPL17 PE=1 SV=3 - [RL17_HUMAN]                                   |
| P84098        | 60S ribosomal protein L19 OS=Homo sapiens GN=RPL19 PE=1 SV=1 - [RL19_HUMAN]                                   |
| P46778        | 60S ribosomal protein L21 OS=Homo sapiens GN=RPL21 PE=1 SV=2 - [RL21_HUMAN]                                   |
| P35268        | 60S ribosomal protein L22 OS=Homo sapiens GN=RPL22 PE=1 SV=2 - [RL22_HUMAN]                                   |
| P62829        | 60S ribosomal protein L23 OS=Homo sapiens GN=RPL23 PE=1 SV=1 - [RL23_HUMAN]                                   |
| P62750        | 60S ribosomal protein L23a OS=Homo sapiens GN=RPL23A PE=1 SV=1 - [RL23A_HUMAN]                                |
| P61353        | 60S ribosomal protein L27 OS=Homo sapiens GN=RPL27 PE=1 SV=2 - [RL27_HUMAN]                                   |
| P46779        | 60S ribosomal protein L28 OS=Homo sapiens GN=RPL28 PE=1 SV=3 - [RL28_HUMAN]                                   |
| P47914        | 60S ribosomal protein L29 OS=Homo sapiens GN=RPL29 PE=1 SV=2 - [RL29_HUMAN]                                   |
| P62888        | 60S ribosomal protein L30 OS=Homo sapiens GN=RPL30 PE=1 SV=2 - [RL30_HUMAN]                                   |
| P49207        | 60S ribosomal protein L34 OS=Homo sapiens GN=RPL34 PE=1 SV=3 - [RL34_HUMAN]                                   |
| P42766        | 60S ribosomal protein L35 OS=Homo sapiens GN=RPL35 PE=1 SV=2 - [RL35_HUMAN]                                   |
| P18077        | 60S ribosomal protein L35a OS=Homo sapiens GN=RPL35A PE=1 SV=2 - [RL35A_HUMAN]                                |
| Q969Q0        | 60S ribosomal protein L36a-like OS=Homo sapiens GN=RPL36AL PE=1 SV=3 - [RL36L_HUMAN]                          |
| Q02878        | 60S ribosomal protein L6 OS=Homo sapiens GN=RPL6 PE=1 SV=3 - [RL6_HUMAN]                                      |
| P18124        | 60S ribosomal protein L7 OS=Homo sapiens GN=RPL7 PE=1 SV=1 - [RL7_HUMAN]                                      |
| P11021        | 78 kDa glucose-regulated protein OS=Homo sapiens GN=HSPA5 PE=1 SV=2 - [GRP78_HUMAN]                           |
| Q02952        | A-kinase anchor protein 12 OS=Homo sapiens GN=AKAP12 PE=1 SV=4 - [AKA12_HUMAN]                                |
| Q2L6I2        | ABC50 protein OS=Homo sapiens GN=ABCF1 PE=2 SV=1 - [Q2L6I2_HUMAN]                                             |
| Q8NG38        | ABG-deleted variant of telomerase reverse transcriptase OS=Homo sapiens GN=TERT PE=2 SV=1 - [Q8NG38_HUMAN]    |

|               |                                                                                                                          |
|---------------|--------------------------------------------------------------------------------------------------------------------------|
| Q8IZT6        | Abnormal spindle-like microcephaly-associated protein OS=Homo sapiens GN=ASPM PE=1 SV=2 - [ASPM_HUMAN]                   |
| Q9BWD1        | Acetyl-CoA acetyltransferase, cytosolic OS=Homo sapiens GN=ACAT2 PE=1 SV=2 - [THIC_HUMAN]                                |
| Q92688        | Acidic leucine-rich nuclear phosphoprotein 32 family member B OS=Homo sapiens GN=ANP32B PE=1 SV=1 - [AN32B_HUMAN]        |
| P61160        | Actin-related protein 2 OS=Homo sapiens GN=ACTR2 PE=1 SV=1 - [ARP2_HUMAN]                                                |
| O15143        | Actin-related protein 2/3 complex subunit 1B OS=Homo sapiens GN=ARPC1B PE=1 SV=3 - [ARC1B_HUMAN]                         |
| O15144        | Actin-related protein 2/3 complex subunit 2 OS=Homo sapiens GN=ARPC2 PE=1 SV=1 - [ARPC2_HUMAN]                           |
| B1ALC0        | Actin-related protein 2/3 complex subunit 5 OS=Homo sapiens GN=ARPC5 PE=3 SV=1 - [B1ALC0_HUMAN]                          |
| Q9BPX5        | Actin-related protein 2/3 complex subunit 5-like protein OS=Homo sapiens GN=ARPC5L PE=1 SV=1 - [ARP5L_HUMAN]             |
| P63267        | Actin, gamma-enteric smooth muscle OS=Homo sapiens GN=ACTG2 PE=1 SV=1 - [ACTH_HUMAN]                                     |
| P53999        | Activated RNA polymerase II transcriptional coactivator p15 OS=Homo sapiens GN=SUB1 PE=1 SV=3 - [TCP4_HUMAN]             |
| O95433        | Activator of 90 kDa heat shock protein ATPase homolog 1 OS=Homo sapiens GN=AHSA1 PE=1 SV=1 - [AHSA1_HUMAN]               |
| Q8NER5        | Activin receptor type-1C OS=Homo sapiens GN=ACVR1C PE=1 SV=1 - [ACV1C_HUMAN]                                             |
| P07108        | Acyl-CoA-binding protein OS=Homo sapiens GN=DBI PE=1 SV=2 - [ACBP_HUMAN]                                                 |
| Q8N9L9        | Acyl-coenzyme A thioesterase 4 OS=Homo sapiens GN=ACOT4 PE=1 SV=2 - [ACOT4_HUMAN]                                        |
| <i>P13798</i> | <i>Acylamino-acid-releasing enzyme OS=Homo sapiens GN=APEH PE=1 SV=4 - [ACPH_HUMAN]</i>                                  |
| P07311        | Acylphosphatase-1 OS=Homo sapiens GN=ACYP1 PE=1 SV=2 - [ACYP1_HUMAN]                                                     |
| P46108        | Adapter molecule crk OS=Homo sapiens GN=CRK PE=1 SV=2 - [CRK_HUMAN]                                                      |
| Q7Z451        | Adaptor-related protein complex 2, beta 1 subunit, isoform CRA_f OS=Homo sapiens GN=AP2B1 PE=2 SV=1 - [Q7Z451_HUMAN]     |
| Q96D30        | ADD1 protein OS=Homo sapiens GN=ADD1 PE=2 SV=1 - [Q96D30_HUMAN]                                                          |
| P07741        | Adenine phosphoribosyltransferase OS=Homo sapiens GN=APRT PE=1 SV=2 - [APT_HUMAN]                                        |
| F5H737        | Adenosylhomocysteinase OS=Homo sapiens GN=AHCY PE=3 SV=1 - [F5H737_HUMAN]                                                |
| <i>P00568</i> | <i>Adenylate kinase isoenzyme 1 OS=Homo sapiens GN=AK1 PE=1 SV=3 - [KAD1_HUMAN]</i>                                      |
| P30566        | Adenylosuccinate lyase OS=Homo sapiens GN=ADSL PE=1 SV=2 - [PUR8_HUMAN]                                                  |
| F5H6Z3        | Adenylyl cyclase-associated protein OS=Homo sapiens GN=CAP1 PE=3 SV=1 - [F5H6Z3_HUMAN]                                   |
| P36405        | ADP-ribosylation factor-like protein 3 OS=Homo sapiens GN=ARL3 PE=1 SV=2 - [ARL3_HUMAN]                                  |
| Q9UUK9        | ADP-sugar pyrophosphatase OS=Homo sapiens GN=NUDT5 PE=1 SV=1 - [NUDT5_HUMAN]                                             |
| P24298        | Alanine aminotransferase 1 OS=Homo sapiens GN=GPT PE=1 SV=3 - [ALAT1_HUMAN]                                              |
| P49588        | Alanyl-tRNA synthetase, cytoplasmic OS=Homo sapiens GN=AARS PE=1 SV=2 - [SYAC_HUMAN]                                     |
| C9JKR2        | Albumin, isoform CRA_k OS=Homo sapiens GN=ALB PE=4 SV=1 - [C9JKR2_HUMAN]                                                 |
| P14550        | Alcohol dehydrogenase [NADP+] OS=Homo sapiens GN=AKR1A1 PE=1 SV=3 - [AK1A1_HUMAN]                                        |
| P11766        | Alcohol dehydrogenase class-3 OS=Homo sapiens GN=ADH5 PE=1 SV=4 - [ADHX_HUMAN]                                           |
| Q06278        | Aldehyde oxidase OS=Homo sapiens GN=AOX1 PE=2 SV=2 - [ADO_HUMAN]                                                         |
| P42330        | Aldo-keto reductase family 1 member C3 OS=Homo sapiens GN=AKR1C3 PE=1 SV=4 - [AK1C3_HUMAN]                               |
| P15121        | Aldose reductase OS=Homo sapiens GN=AKR1B1 PE=1 SV=3 - [ALDR_HUMAN]                                                      |
| Q6P4F1        | Alpha-(1,3)-fucosyltransferase 10 OS=Homo sapiens GN=FUT10 PE=2 SV=2 - [FUT10_HUMAN]                                     |
| P01023        | Alpha-2-macroglobulin OS=Homo sapiens GN=A2M PE=1 SV=3 - [A2MG_HUMAN]                                                    |
| O43768        | Alpha-endosulfine OS=Homo sapiens GN=ENSA PE=1 SV=1 - [ENSA_HUMAN]                                                       |
| <i>P06733</i> | <i>Alpha-enolase OS=Homo sapiens GN=ENO1 PE=1 SV=2 - [ENOA_HUMAN]</i>                                                    |
| <i>Q9NZD4</i> | <i>Alpha-hemoglobin-stabilizing protein OS=Homo sapiens GN=AHSP PE=1 SV=1 - [AHSP_HUMAN]</i>                             |
| Q9NTJ4        | Alpha-mannosidase 2C1 OS=Homo sapiens GN=MAN2C1 PE=1 SV=1 - [MA2C1_HUMAN]                                                |
| P54920        | Alpha-soluble NSF attachment protein OS=Homo sapiens GN=NAPA PE=1 SV=3 - [SNAA_HUMAN]                                    |
| Q12904        | Aminoacyl tRNA synthase complex-interacting multifunctional protein 1 OS=Homo sapiens GN=AIMP1 PE=1 SV=2 - [AIMP1_HUMAN] |
| A2RU49        | Aminoglycoside phosphotransferase domain-containing protein 1 OS=Homo sapiens GN=AGPHD1 PE=2 SV=2 - [AGPD1_HUMAN]        |



|               |                                                                                                                                 |
|---------------|---------------------------------------------------------------------------------------------------------------------------------|
| Q6F181        | Anamorsin OS=Homo sapiens GN=CIAPIN1 PE=1 SV=2 - [CPIN1_HUMAN]                                                                  |
| Q8N302        | Angiogenic factor with G patch and FHA domains 1 OS=Homo sapiens GN=AGGF1 PE=1 SV=2 - [AGGF1_HUMAN]                             |
| Q9Y5C1        | Angiopietin-related protein 3 OS=Homo sapiens GN=ANGPTL3 PE=1 SV=1 - [ANGL3_HUMAN]                                              |
| Q8N7Z5        | Ankyrin repeat domain-containing protein 31 OS=Homo sapiens GN=ANKRD31 PE=5 SV=2 - [ANR31_HUMAN]                                |
| A6NCL7        | Ankyrin repeat domain-containing protein 33B OS=Homo sapiens GN=ANKRD33B PE=4 SV=1 - [AN33B_HUMAN]                              |
| P08758        | Annexin A5 OS=Homo sapiens GN=ANXA5 PE=1 SV=2 - [ANXA5_HUMAN]                                                                   |
| O75843        | AP-1 complex subunit gamma-like 2 OS=Homo sapiens GN=AP1G2 PE=1 SV=1 - [AP1G2_HUMAN]                                            |
| O95782        | AP-2 complex subunit alpha-1 OS=Homo sapiens GN=AP2A1 PE=1 SV=3 - [AP2A1_HUMAN]                                                 |
| P53680        | AP-2 complex subunit sigma OS=Homo sapiens GN=AP2S1 PE=1 SV=2 - [AP2S1_HUMAN]                                                   |
| Q8NCW5        | Apolipoprotein A-I-binding protein OS=Homo sapiens GN=APOA1BP PE=1 SV=2 - [AIBP_HUMAN]                                          |
| Q1L6K4        | Apoptosis-inducing factor short isoform 3 OS=Homo sapiens GN=PDCD8 PE=2 SV=1 - [Q1L6K4_HUMAN]                                   |
| A6NM98        | ARD1 homolog A, N-acetyltransferase ( <i>S. cerevisiae</i> ), isoform CRA_b OS=Homo sapiens GN=NAA10 PE=4 SV=1 - [A6NM98_HUMAN] |
| Q15057        | Arf-GAP with coiled-coil, ANK repeat and PH domain-containing protein 2 OS=Homo sapiens GN=ACAP2 PE=1 SV=3 - [ACAP2_HUMAN]      |
| Q99490        | Arf-GAP with GTPase, ANK repeat and PH domain-containing protein 2 OS=Homo sapiens GN=AGAP2 PE=1 SV=2 - [AGAP2_HUMAN]           |
| Q9ULH1        | Arf-GAP with SH3 domain, ANK repeat and PH domain-containing protein 1 OS=Homo sapiens GN=ASAP1 PE=1 SV=4 - [ASAP1_HUMAN]       |
| P05089        | Arginase-1 OS=Homo sapiens GN=ARG1 PE=1 SV=2 - [ARG1_HUMAN]                                                                     |
| B1AKN3        | Arginine-glutamic acid dipeptide (RE) repeats OS=Homo sapiens GN=RERE PE=4 SV=1 - [B1AKN3_HUMAN]                                |
| O43776        | Asparaginyl-tRNA synthetase, cytoplasmic OS=Homo sapiens GN=NARS PE=1 SV=1 - [SYNC_HUMAN]                                       |
| E7ERW2        | Aspartate aminotransferase OS=Homo sapiens GN=GOT2 PE=3 SV=1 - [E7ERW2_HUMAN]                                                   |
| <i>P17174</i> | <i>Aspartate aminotransferase, cytoplasmic OS=Homo sapiens GN=GOT1 PE=1 SV=3 - [AATC_HUMAN]</i>                                 |
| <i>P14868</i> | <i>Aspartyl-tRNA synthetase, cytoplasmic OS=Homo sapiens GN=DARS PE=1 SV=2 - [SYDC_HUMAN]</i>                                   |
| Q9NP58        | ATP-binding cassette sub-family B member 6, mitochondrial OS=Homo sapiens GN=ABCB6 PE=1 SV=1 - [ABCB6_HUMAN]                    |
| P53396        | ATP-citrate synthase OS=Homo sapiens GN=ACLY PE=1 SV=3 - [ACLY_HUMAN]                                                           |
| Q08211        | ATP-dependent RNA helicase A OS=Homo sapiens GN=DHX9 PE=1 SV=4 - [DHX9_HUMAN]                                                   |
| Q9NUU7        | ATP-dependent RNA helicase DDX19A OS=Homo sapiens GN=DDX19A PE=1 SV=1 - [DD19A_HUMAN]                                           |
| Q7Z478        | ATP-dependent RNA helicase DHX29 OS=Homo sapiens GN=DHX29 PE=1 SV=2 - [DHX29_HUMAN]                                             |
| Q96QE3        | ATPase family AAA domain-containing protein 5 OS=Homo sapiens GN=ATAD5 PE=1 SV=4 - [ATAD5_HUMAN]                                |
| Q9UII2        | ATPase inhibitor, mitochondrial OS=Homo sapiens GN=ATPIF1 PE=1 SV=1 - [ATIF1_HUMAN]                                             |
| P16066        | Atrial natriuretic peptide receptor 1 OS=Homo sapiens GN=NPR1 PE=1 SV=1 - [ANPRA_HUMAN]                                         |
| Q8WXX7        | Autism susceptibility gene 2 protein OS=Homo sapiens GN=AUTS2 PE=1 SV=1 - [AUTS2_HUMAN]                                         |
| A4D250        | B-cell acute lymphoblastic leukemia-expressed protein OS=Homo sapiens GN=BLACE PE=2 SV=1 - [BLACE_HUMAN]                        |
| Q9P281        | BAH and coiled-coil domain-containing protein 1 OS=Homo sapiens GN=BAHCC1 PE=1 SV=3 - [BAHC1_HUMAN]                             |
| P02730        | Band 3 anion transport protein OS=Homo sapiens GN=SLC4A1 PE=1 SV=3 - [B3AT_HUMAN]                                               |
| O43491        | Band 4.1-like protein 2 OS=Homo sapiens GN=EPB41L2 PE=1 SV=1 - [E41L2_HUMAN]                                                    |
| Q9H329        | Band 4.1-like protein 4B OS=Homo sapiens GN=EPB41L4B PE=2 SV=2 - [E41LB_HUMAN]                                                  |
| O75531        | Barrier-to-autointegration factor OS=Homo sapiens GN=BANF1 PE=1 SV=1 - [BAF_HUMAN]                                              |
| A2RRM7        | BBX protein OS=Homo sapiens GN=BBX PE=2 SV=1 - [A2RRM7_HUMAN]                                                                   |
| A2A492        | BCL2/adenovirus E1B 19kD interacting protein like OS=Homo sapiens GN=BNIPL PE=4 SV=1 - [A2A492_HUMAN]                           |
| P07814        | Bifunctional aminoacyl-tRNA synthetase OS=Homo sapiens GN=EPRS PE=1 SV=5 - [SYEP_HUMAN]                                         |
| Q3LXA3        | Bifunctional ATP-dependent dihydroxyacetone kinase/FAD-AMP lyase (cyclizing) OS=Homo sapiens GN=DAK PE=1 SV=2 - [DHAK_HUMAN]    |
| <i>Q13057</i> | <i>Bifunctional coenzyme A synthase OS=Homo sapiens GN=COASY PE=1 SV=4 - [COASY_HUMAN]</i>                                      |
| <i>P53004</i> | <i>Biliverdin reductase A OS=Homo sapiens GN=BLVRA PE=1 SV=2 - [BIEA_HUMAN]</i>                                                 |
| Q6QNY1        | Biogenesis of lysosome-related organelles complex 1 subunit 2 OS=Homo sapiens GN=BLOC1S2 PE=1 SV=1 - [BL1S2_HUMAN]              |

|        |                                                                                                                                                                    |
|--------|--------------------------------------------------------------------------------------------------------------------------------------------------------------------|
| P50583 | Bis(5'-nucleosyl)-tetraphosphatase [asymmetrical] OS=Homo sapiens GN=NUDT2 PE=1 SV=3 - [AP4A_HUMAN]                                                                |
| P07738 | <i>Bisphosphoglycerate mutase</i> OS=Homo sapiens GN=BPGM PE=1 SV=2 - [PMGE_HUMAN]                                                                                 |
| Q13867 | Bleomycin hydrolase OS=Homo sapiens GN=BLMH PE=1 SV=1 - [BLMH_HUMAN]                                                                                               |
| Q9H3K6 | BolA-like protein 2 OS=Homo sapiens GN=BOLA2 PE=1 SV=1 - [BOLA2_HUMAN]                                                                                             |
| P13497 | Bone morphogenetic protein 1 OS=Homo sapiens GN=BMP1 PE=1 SV=2 - [BMP1_HUMAN]                                                                                      |
| B7Z5L0 | Branched-chain-amino-acid aminotransferase OS=Homo sapiens GN=BCAT1 PE=2 SV=1 - [B7Z5L0_HUMAN]                                                                     |
| Q9NWW8 | BRISC and BRCA1-A complex member 1 OS=Homo sapiens GN=BABAM1 PE=1 SV=1 - [BABA1_HUMAN]                                                                             |
| Q5VW32 | BRO1 domain-containing protein BROX OS=Homo sapiens GN=BROX PE=1 SV=1 - [BROX_HUMAN]                                                                               |
| Q7L273 | BTB/POZ domain-containing protein KCTD9 OS=Homo sapiens GN=KCTD9 PE=2 SV=1 - [KCTD9_HUMAN]                                                                         |
| P11586 | C-1-tetrahydrofolate synthase, cytoplasmic OS=Homo sapiens GN=MTHFD1 PE=1 SV=3 - [C1TC_HUMAN]                                                                      |
| O15467 | C-C motif chemokine 16 OS=Homo sapiens GN=CCL16 PE=1 SV=1 - [CCL16_HUMAN]                                                                                          |
| P27708 | CAD protein OS=Homo sapiens GN=CAD PE=1 SV=3 - [PYR1_HUMAN]                                                                                                        |
| Q9BRF8 | Calcineurin-like phosphoesterase domain-containing protein 1 OS=Homo sapiens GN=CPPED1 PE=1 SV=3 - [CPPED_HUMAN]                                                   |
| Q9Y6N3 | Calcium-activated chloride channel regulator family member 3 OS=Homo sapiens GN=CLCA3P PE=1 SV=1 - [CLCA3_HUMAN]                                                   |
| Q9Y2V2 | Calcium-regulated heat stable protein 1 OS=Homo sapiens GN=CARHSP1 PE=1 SV=2 - [CHSP1_HUMAN]                                                                       |
| B2ZWH1 | Calcyclin binding protein (Fragment) OS=Homo sapiens GN=CACYBP PE=4 SV=1 - [B2ZWH1_HUMAN]                                                                          |
| Q05682 | Caldesmon OS=Homo sapiens GN=CALD1 PE=1 SV=3 - [CALD1_HUMAN]                                                                                                       |
| P62158 | Calmodulin OS=Homo sapiens GN=CALM1 PE=1 SV=2 - [CALM_HUMAN]                                                                                                       |
| P04632 | Calpain small subunit 1 OS=Homo sapiens GN=CAPNS1 PE=1 SV=1 - [CPNS1_HUMAN]                                                                                        |
| P07384 | Calpain-1 catalytic subunit OS=Homo sapiens GN=CAPN1 PE=1 SV=1 - [CAN1_HUMAN]                                                                                      |
| P27797 | Calreticulin OS=Homo sapiens GN=CALR PE=1 SV=1 - [CALR_HUMAN]                                                                                                      |
| P17612 | cAMP-dependent protein kinase catalytic subunit alpha OS=Homo sapiens GN=PRKACA PE=1 SV=2 - [KAPCA_HUMAN]                                                          |
| Q92887 | Canalicular multispecific organic anion transporter 1 OS=Homo sapiens GN=ABCC2 PE=1 SV=3 - [MRP2_HUMAN]                                                            |
| B1AK87 | Capping protein (Actin filament) muscle Z-line, beta OS=Homo sapiens GN=CAPZB PE=4 SV=1 - [B1AK87_HUMAN]                                                           |
| P00915 | Carbonic anhydrase 1 OS=Homo sapiens GN=CA1 PE=1 SV=2 - [CAH1_HUMAN]                                                                                               |
| P00918 | Carbonic anhydrase 2 OS=Homo sapiens GN=CA2 PE=1 SV=2 - [CAH2_HUMAN]                                                                                               |
| P35219 | Carbonic anhydrase-related protein OS=Homo sapiens GN=CA8 PE=1 SV=3 - [CAH8_HUMAN]                                                                                 |
| P16152 | Carbonyl reductase [NADPH] 1 OS=Homo sapiens GN=CBR1 PE=1 SV=3 - [CBR1_HUMAN]                                                                                      |
| Q96DG6 | Carboxymethylenebutenolidase homolog OS=Homo sapiens GN=CMBL PE=1 SV=1 - [CMBL_HUMAN]                                                                              |
| P48052 | Carboxypeptidase A2 OS=Homo sapiens GN=CPA2 PE=1 SV=3 - [CBPA2_HUMAN]                                                                                              |
| A3EY21 | Cardiac sodium channel alpha subunit (Fragment) OS=Homo sapiens GN=SCN5A PE=2 SV=1 - [A3EY21_HUMAN]                                                                |
| P19784 | Casein kinase II subunit alpha' OS=Homo sapiens GN=CSNK2A2 PE=1 SV=1 - [CSK22_HUMAN]                                                                               |
| P67870 | Casein kinase II subunit beta OS=Homo sapiens GN=CSNK2B PE=1 SV=1 - [CSK2B_HUMAN]                                                                                  |
| P04040 | Catalase OS=Homo sapiens GN=CAT PE=1 SV=3 - [CATA_HUMAN]                                                                                                           |
| Q05BA3 | CCDC19 protein OS=Homo sapiens GN=CCDC19 PE=2 SV=1 - [Q05BA3_HUMAN]                                                                                                |
| Q9Y5K6 | CD2-associated protein OS=Homo sapiens GN=CD2AP PE=1 SV=1 - [CD2AP_HUMAN]                                                                                          |
| B3KW52 | cDNA FLJ42145 fis, clone TESTI4000228, highly similar to Mus musculus ubiquitin family domain containing 1 (Ubf1), mRNA OS=Homo sapiens PE=2 SV=1 - [B3KW52_HUMAN] |
| B3KXM6 | cDNA FLJ45735 fis, clone JCMLC2000273, highly similar to Integrin alpha-M OS=Homo sapiens PE=2 SV=1 - [B3KXM6_HUMAN]                                               |
| B7Z3E2 | cDNA FLJ50777, highly similar to Serine/threonine-protein phosphatase 6 (EC 3.1.3.16) OS=Homo sapiens PE=2 SV=1 - [B7Z3E2_HUMAN]                                   |
| B4DEW9 | cDNA FLJ52478, highly similar to Eukaryotic translation initiation factor 3 subunit 5 OS=Homo sapiens PE=2 SV=1 - [B4DEW9_HUMAN]                                   |
| B4DUR7 | cDNA FLJ52763, highly similar to Adaptin ear-binding coat-associated protein 2 OS=Homo sapiens PE=2 SV=1 - [B4DUR7_HUMAN]                                          |
| B4DHX4 | cDNA FLJ52902, highly similar to Rab GDP dissociation inhibitor alpha OS=Homo sapiens PE=2 SV=1 - [B4DHX4_HUMAN]                                                   |
| B4DS57 | cDNA FLJ53176, highly similar to Nuclear autoantigenic sperm protein OS=Homo sapiens PE=2 SV=1 - [B4DS57_HUMAN]                                                    |

|        |                                                                                                                                                         |
|--------|---------------------------------------------------------------------------------------------------------------------------------------------------------|
| B4DFF1 | cDNA FLJ53312, highly similar to Heterogeneous nuclear ribonucleoprotein K OS=Homo sapiens PE=2 SV=1 - [B4DFF1_HUMAN]                                   |
| B4DPJ6 | cDNA FLJ53635, highly similar to Homo sapiens tumor protein D52-like 2 (TPD52L2), transcript variant 6, mRNA OS=Homo sapiens PE=2 SV=1 - [B4DPJ6_HUMAN] |
| B4DH37 | cDNA FLJ53760, highly similar to Syntaxin-7 OS=Homo sapiens PE=2 SV=1 - [B4DH37_HUMAN]                                                                  |
| B4DW31 | cDNA FLJ54186, highly similar to Nuclear receptor-binding protein OS=Homo sapiens PE=2 SV=1 - [B4DW31_HUMAN]                                            |
| B7Z2C8 | cDNA FLJ55681, highly similar to F-box/WD repeat protein 7 OS=Homo sapiens PE=2 SV=1 - [B7Z2C8_HUMAN]                                                   |
| B4E022 | cDNA FLJ56274, highly similar to Transketolase (EC 2.2.1.1) OS=Homo sapiens PE=2 SV=1 - [B4E022_HUMAN]                                                  |
| B4DK60 | cDNA FLJ57515, highly similar to CDK5 and ABL1 enzyme substrate 1 OS=Homo sapiens PE=2 SV=1 - [B4DK60_HUMAN]                                            |
| B7Z337 | cDNA FLJ57728, highly similar to Ras-related protein Rab-6B OS=Homo sapiens PE=2 SV=1 - [B7Z337_HUMAN]                                                  |
| B4DET8 | cDNA FLJ57956 OS=Homo sapiens PE=2 SV=1 - [B4DET8_HUMAN]                                                                                                |
| B4DKI1 | cDNA FLJ58071, highly similar to Annexin A8 OS=Homo sapiens PE=2 SV=1 - [B4DKI1_HUMAN]                                                                  |
| B4DZV5 | cDNA FLJ58820, highly similar to 55 kDa erythrocyte membrane protein (p55) OS=Homo sapiens PE=2 SV=1 - [B4DZV5_HUMAN]                                   |
| B4DFA2 | cDNA FLJ59316, highly similar to Vesicle-fusing ATPase (EC 3.6.4.6) OS=Homo sapiens PE=2 SV=1 - [B4DFA2_HUMAN]                                          |
| B4DXR2 | cDNA FLJ60945, highly similar to Eukaryotic translation initiation factor 4gamma 3 OS=Homo sapiens PE=2 SV=1 - [B4DXR2_HUMAN]                           |
| A8K1R6 | cDNA FLJ77026, highly similar to Homo sapiens ataxin 2-like (ATXN2L), transcript variant E, mRNA OS=Homo sapiens PE=2 SV=1 - [A8K1R6_HUMAN]             |
| A8K1B6 | cDNA FLJ78533, highly similar to Homo sapiens dynamin 2 (DNM2), transcript variant 4, mRNA OS=Homo sapiens PE=2 SV=1 - [A8K1B6_HUMAN]                   |
| Q9H636 | CDNA: FLJ22634 fis, clone HSI06565 OS=Homo sapiens GN=GRHPR PE=2 SV=1 - [Q9H636_HUMAN]                                                                  |
| Q9ULG6 | Cell cycle progression protein 1 OS=Homo sapiens GN=CCPG1 PE=1 SV=3 - [CCPG1_HUMAN]                                                                     |
| P60953 | Cell division control protein 42 homolog OS=Homo sapiens GN=CDC42 PE=1 SV=2 - [CDC42_HUMAN]                                                             |
| P49454 | Centromere protein F OS=Homo sapiens GN=CENPF PE=1 SV=2 - [CENPF_HUMAN]                                                                                 |
| Q6ZU80 | Centrosomal protein of 128 kDa OS=Homo sapiens GN=CEP128 PE=1 SV=2 - [CE128_HUMAN]                                                                      |
| Q9BV73 | Centrosome-associated protein CEP250 OS=Homo sapiens GN=CEP250 PE=1 SV=2 - [CP250_HUMAN]                                                                |
| Q3B7A2 | CEP152 protein (Fragment) OS=Homo sapiens GN=CEP152 PE=2 SV=1 - [Q3B7A2_HUMAN]                                                                          |
| B7Z4T9 | Chaperonin containing TCP1, subunit 7 (Eta), isoform CRA_c OS=Homo sapiens GN=CCT7 PE=2 SV=1 - [B7Z4T9_HUMAN]                                           |
| Q7LBR1 | Charged multivesicular body protein 1b OS=Homo sapiens GN=CHMP1B PE=1 SV=1 - [CHM1B_HUMAN]                                                              |
| O43633 | Charged multivesicular body protein 2a OS=Homo sapiens GN=CHMP2A PE=1 SV=1 - [CHM2A_HUMAN]                                                              |
| Q9H444 | Charged multivesicular body protein 4b OS=Homo sapiens GN=CHMP4B PE=1 SV=1 - [CHM4B_HUMAN]                                                              |
| O00299 | Chloride intracellular channel protein 1 OS=Homo sapiens GN=CLIC1 PE=1 SV=4 - [CLIC1_HUMAN]                                                             |
| Q9Y259 | Choline/ethanolamine kinase OS=Homo sapiens GN=CHKB PE=1 SV=3 - [CHKB_HUMAN]                                                                            |
| Q13185 | Chromobox protein homolog 3 OS=Homo sapiens GN=CBX3 PE=1 SV=4 - [CBX3_HUMAN]                                                                            |
| P09093 | Chymotrypsin-like elastase family member 3A OS=Homo sapiens GN=CELA3A PE=1 SV=3 - [CEL3A_HUMAN]                                                         |
| Q00610 | Clathrin heavy chain 1 OS=Homo sapiens GN=CLTC PE=1 SV=5 - [CLH1_HUMAN]                                                                                 |
| P53675 | Clathrin heavy chain 2 OS=Homo sapiens GN=CLTCL1 PE=1 SV=2 - [CLH2_HUMAN]                                                                               |
| P09497 | Clathrin light chain B OS=Homo sapiens GN=CLTB PE=1 SV=1 - [CLCB_HUMAN]                                                                                 |
| P53621 | Coatomer subunit alpha OS=Homo sapiens GN=COPA PE=1 SV=2 - [COPA_HUMAN]                                                                                 |
| P48444 | Coatomer subunit delta OS=Homo sapiens GN=ARCN1 PE=1 SV=1 - [COPD_HUMAN]                                                                                |
| Q9UBF2 | Coatomer subunit gamma-2 OS=Homo sapiens GN=COPG2 PE=1 SV=1 - [COPG2_HUMAN]                                                                             |
| Q5T0F9 | Coiled-coil and C2 domain-containing protein 1B OS=Homo sapiens GN=CC2D1B PE=1 SV=1 - [C2D1B_HUMAN]                                                     |
| Q96CT7 | Coiled-coil domain-containing protein 124 OS=Homo sapiens GN=CCDC124 PE=1 SV=1 - [CC124_HUMAN]                                                          |
| Q8IYE1 | Coiled-coil domain-containing protein 13 OS=Homo sapiens GN=CCDC13 PE=2 SV=2 - [CCD13_HUMAN]                                                            |
| Q4G0X9 | Coiled-coil domain-containing protein 40 OS=Homo sapiens GN=CCDC40 PE=2 SV=2 - [CCD40_HUMAN]                                                            |
| Q96MW1 | Coiled-coil domain-containing protein 43 OS=Homo sapiens GN=CCDC43 PE=1 SV=2 - [CCD43_HUMAN]                                                            |
| Q8NEL0 | Coiled-coil domain-containing protein 54 OS=Homo sapiens GN=CCDC54 PE=1 SV=2 - [CCD54_HUMAN]                                                            |
| Q16204 | Coiled-coil domain-containing protein 6 OS=Homo sapiens GN=CCDC6 PE=1 SV=2 - [CCDC6_HUMAN]                                                              |

|        |                                                                                                                                            |
|--------|--------------------------------------------------------------------------------------------------------------------------------------------|
| A6NI79 | Coiled-coil domain-containing protein 69 OS=Homo sapiens GN=CCDC69 PE=2 SV=1 - [CCD69_HUMAN]                                               |
| Q6ZRK6 | Coiled-coil domain-containing protein 73 OS=Homo sapiens GN=CCDC73 PE=1 SV=2 - [CCD73_HUMAN]                                               |
| Q7Z6B0 | Coiled-coil domain-containing protein 91 OS=Homo sapiens GN=CCDC91 PE=1 SV=2 - [CCD91_HUMAN]                                               |
| Q8N8F7 | Coiled-coil domain-containing transmembrane protein C7orf53 OS=Homo sapiens GN=C7orf53 PE=2 SV=1 - [CG053_HUMAN]                           |
| Q02388 | Collagen alpha-1(VII) chain OS=Homo sapiens GN=COL7A1 PE=1 SV=2 - [CO7A1_HUMAN]                                                            |
| P29400 | Collagen alpha-5(IV) chain OS=Homo sapiens GN=COL4A5 PE=1 SV=2 - [CO4A5_HUMAN]                                                             |
| A6NMZ7 | Collagen alpha-6(VI) chain OS=Homo sapiens GN=COL6A6 PE=1 SV=2 - [CO6A6_HUMAN]                                                             |
| A2A2Y8 | Collagen, type XVII, alpha 1 OS=Homo sapiens GN=COL17A1 PE=4 SV=1 - [A2A2Y8_HUMAN]                                                         |
| Q9BXJ0 | Complement C1q tumor necrosis factor-related protein 5 OS=Homo sapiens GN=C1QTNF5 PE=1 SV=1 - [C1QT5_HUMAN]                                |
| P02748 | Complement component C9 OS=Homo sapiens GN=C9 PE=1 SV=2 - [CO9_HUMAN]                                                                      |
| Q15021 | Condensin complex subunit 1 OS=Homo sapiens GN=NCAPD2 PE=1 SV=3 - [CND1_HUMAN]                                                             |
| Q9BPX3 | Condensin complex subunit 3 OS=Homo sapiens GN=NCAPG PE=1 SV=1 - [CND3_HUMAN]                                                              |
| A8K1H6 | COP9 constitutive photomorphogenic homolog subunit 8 (Arabidopsis), isoform CRA_b OS=Homo sapiens GN=COPS8 PE=2 SV=1 - [A8K1H6_HUMAN]      |
| Q13098 | COP9 signalosome complex subunit 1 OS=Homo sapiens GN=GPS1 PE=1 SV=4 - [CSN1_HUMAN]                                                        |
| Q9BT78 | COP9 signalosome complex subunit 4 OS=Homo sapiens GN=COPS4 PE=1 SV=1 - [CSN4_HUMAN]                                                       |
| Q92905 | COP9 signalosome complex subunit 5 OS=Homo sapiens GN=COPS5 PE=1 SV=4 - [CSN5_HUMAN]                                                       |
| Q9UBW8 | COP9 signalosome complex subunit 7a OS=Homo sapiens GN=COPS7A PE=1 SV=1 - [CSN7A_HUMAN]                                                    |
| Q9H9Q2 | COP9 signalosome complex subunit 7b OS=Homo sapiens GN=COPS7B PE=1 SV=1 - [CSN7B_HUMAN]                                                    |
| Q5JX54 | Copine I (Fragment) OS=Homo sapiens GN=CPNE1 PE=2 SV=1 - [Q5JX54_HUMAN]                                                                    |
| O75131 | Copine-3 OS=Homo sapiens GN=CPNE3 PE=1 SV=1 - [CPNE3_HUMAN]                                                                                |
| O14618 | Copper chaperone for superoxide dismutase OS=Homo sapiens GN=CCS PE=1 SV=1 - [CCS_HUMAN]                                                   |
| P36551 | Coproporphyrinogen-III oxidase, mitochondrial OS=Homo sapiens GN=CPOX PE=1 SV=3 - [HEM6_HUMAN]                                             |
| B5MDT7 | Core-binding factor, runt domain, alpha subunit 2; translocated to, 3, isoform CRA_a OS=Homo sapiens GN=CBFA2T3 PE=4 SV=1 - [B5MDT7_HUMAN] |
| Q9ULV4 | Coronin-1C OS=Homo sapiens GN=CORO1C PE=1 SV=1 - [COR1C_HUMAN]                                                                             |
| P57737 | Coronin-7 OS=Homo sapiens GN=CORO7 PE=1 SV=2 - [CORO7_HUMAN]                                                                               |
| Q96H99 | Cortactin OS=Homo sapiens GN=CTTN PE=2 SV=1 - [Q96H99_HUMAN]                                                                               |
| Q9UEE9 | Craniofacial development protein 1 OS=Homo sapiens GN=CFDP1 PE=1 SV=1 - [CFDP1_HUMAN]                                                      |
| Q49AN0 | Cryptochrome-2 OS=Homo sapiens GN=CRY2 PE=1 SV=2 - [CRY2_HUMAN]                                                                            |
| P17812 | CTP synthase 1 OS=Homo sapiens GN=CTPS PE=1 SV=2 - [PYRG1_HUMAN]                                                                           |
| Q9NRF8 | CTP synthase 2 OS=Homo sapiens GN=CTPS2 PE=1 SV=1 - [PYRG2_HUMAN]                                                                          |
| B1AMN7 | CTTNBP2 N-terminal like (Fragment) OS=Homo sapiens GN=CTTNBP2NL PE=4 SV=1 - [B1AMN7_HUMAN]                                                 |
| Q13617 | Cullin-2 OS=Homo sapiens GN=CUL2 PE=1 SV=2 - [CUL2_HUMAN]                                                                                  |
| Q13618 | Cullin-3 OS=Homo sapiens GN=CUL3 PE=1 SV=2 - [CUL3_HUMAN]                                                                                  |
| Q86VP6 | Cullin-associated NEDD8-dissociated protein 1 OS=Homo sapiens GN=CAND1 PE=1 SV=2 - [CAND1_HUMAN]                                           |
| O95273 | Cyclin-D1-binding protein 1 OS=Homo sapiens GN=CCNDBP1 PE=1 SV=2 - [CCDB1_HUMAN]                                                           |
| P04080 | Cystatin-B OS=Homo sapiens GN=CSTB PE=1 SV=2 - [CYTB_HUMAN]                                                                                |
| Q9UHD1 | Cysteine and histidine-rich domain-containing protein 1 OS=Homo sapiens GN=CHORDC1 PE=1 SV=2 - [CHRD1_HUMAN]                               |
| Q9H8E8 | Cysteine-rich protein 2-binding protein OS=Homo sapiens GN=CSRP2BP PE=1 SV=3 - [CSR2B_HUMAN]                                               |
| A8MVQ3 | Cysteinyl-tRNA synthetase, isoform CRA_b OS=Homo sapiens GN=CARS PE=2 SV=1 - [A8MVQ3_HUMAN]                                                |
| P00167 | Cytochrome b5 OS=Homo sapiens GN=CYB5A PE=1 SV=2 - [CYB5_HUMAN]                                                                            |
| Q8IUI8 | Cytokine receptor-like factor 3 OS=Homo sapiens GN=CRLF3 PE=1 SV=2 - [CRLF3_HUMAN]                                                         |
| Q8NCM8 | Cytoplasmic dynein 2 heavy chain 1 OS=Homo sapiens GN=DYNC2H1 PE=1 SV=4 - [DYHC2_HUMAN]                                                    |
| P28838 | Cytosol aminopeptidase OS=Homo sapiens GN=LAP3 PE=1 SV=3 - [AMPL_HUMAN]                                                                    |

|        |                                                                                                                 |
|--------|-----------------------------------------------------------------------------------------------------------------|
| P53384 | Cytosolic Fe-S cluster assembly factor NUBP1 OS=Homo sapiens GN=NUBP1 PE=1 SV=2 - [NUBP1_HUMAN]                 |
| Q96KP4 | Cytosolic non-specific dipeptidase OS=Homo sapiens GN=CNDP2 PE=1 SV=2 - [CNDP2_HUMAN]                           |
| P0C869 | Cytosolic phospholipase A2 beta OS=Homo sapiens GN=PLA2G4B PE=1 SV=2 - [PA24B_HUMAN]                            |
| B7Z522 | D-dopachrome tautomerase, isoform CRA_a OS=Homo sapiens GN=DDT PE=4 SV=1 - [B7Z522_HUMAN]                       |
| Q9NYF0 | Dapper homolog 1 OS=Homo sapiens GN=DACT1 PE=2 SV=2 - [DACT1_HUMAN]                                             |
| Q8TEB1 | DDB1- and CUL4-associated factor 11 OS=Homo sapiens GN=DCAF11 PE=1 SV=1 - [DCA11_HUMAN]                         |
| Q3SXM0 | DDB1- and CUL4-associated factor 4-like protein 1 OS=Homo sapiens GN=DCAF4L1 PE=2 SV=1 - [DC4L1_HUMAN]          |
| P51397 | Death-associated protein 1 OS=Homo sapiens GN=DAP PE=1 SV=3 - [DAP1_HUMAN]                                      |
| A0PJW8 | Death-associated protein-like 1 OS=Homo sapiens GN=DAPL1 PE=1 SV=2 - [DAPL1_HUMAN]                              |
| Q9BTC0 | Death-inducer obliterator 1 OS=Homo sapiens GN=DIDO1 PE=1 SV=5 - [DIDO1_HUMAN]                                  |
| Q5JSL3 | Dedicator of cytokinesis protein 11 OS=Homo sapiens GN=DOCK11 PE=1 SV=2 - [DOC11_HUMAN]                         |
| Q8IZD9 | Dedicator of cytokinesis protein 3 OS=Homo sapiens GN=DOCK3 PE=1 SV=1 - [DOCK3_HUMAN]                           |
| Q6UWP2 | Dehydrogenase/reductase SDR family member 11 OS=Homo sapiens GN=DHRS11 PE=1 SV=1 - [DHR11_HUMAN]                |
| Q9Y238 | Deleted in lung and esophageal cancer protein 1 OS=Homo sapiens GN=DLEC1 PE=2 SV=2 - [DLEC1_HUMAN]              |
| B7Z3I9 | Delta-aminolevulinic acid dehydratase OS=Homo sapiens PE=2 SV=1 - [B7Z3I9_HUMAN]                                |
| Q6ZUT9 | DENN domain-containing protein 5B OS=Homo sapiens GN=DENND5B PE=1 SV=2 - [DEN5B_HUMAN]                          |
| O43598 | Deoxyribonucleoside 5'-monophosphate N-glycosidase OS=Homo sapiens GN=RCL PE=1 SV=1 - [RCL_HUMAN]               |
| P33316 | Deoxyuridine 5'-triphosphate nucleotidohydrolase, mitochondrial OS=Homo sapiens GN=DUT PE=1 SV=3 - [DUT_HUMAN]  |
| Q9UL01 | Dermatan-sulfate epimerase OS=Homo sapiens GN=DSE PE=1 SV=1 - [DSE_HUMAN]                                       |
| P81605 | Dermcidin OS=Homo sapiens GN=DCD PE=1 SV=2 - [DCD_HUMAN]                                                        |
| B4DYA6 | Destrin (Actin depolymerizing factor), isoform CRA_a OS=Homo sapiens GN=DSTN PE=2 SV=1 - [B4DYA6_HUMAN]         |
| Q86TI2 | Dipeptidyl peptidase 9 OS=Homo sapiens GN=DPP9 PE=1 SV=3 - [DPP9_HUMAN]                                         |
| Q8NFP7 | Diphosphoinositol polyphosphate phosphohydrolase 3-alpha OS=Homo sapiens GN=NUDT10 PE=1 SV=1 - [NUD10_HUMAN]    |
| P53602 | Diphosphomevalonate decarboxylase OS=Homo sapiens GN=MVD PE=1 SV=1 - [MVD1_HUMAN]                               |
| Q16531 | DNA damage-binding protein 1 OS=Homo sapiens GN=DDB1 PE=1 SV=1 - [DDB1_HUMAN]                                   |
| O00273 | DNA fragmentation factor subunit alpha OS=Homo sapiens GN=DFFA PE=1 SV=1 - [DFFA_HUMAN]                         |
| Q92878 | DNA repair protein RAD50 OS=Homo sapiens GN=RAD50 PE=1 SV=1 - [RAD50_HUMAN]                                     |
| P16989 | DNA-binding protein A OS=Homo sapiens GN=CSDA PE=1 SV=4 - [DBPA_HUMAN]                                          |
| O60884 | DnaJ homolog subfamily A member 2 OS=Homo sapiens GN=DNAJA2 PE=1 SV=1 - [DNJA2_HUMAN]                           |
| Q8WW22 | DnaJ homolog subfamily A member 4 OS=Homo sapiens GN=DNAJA4 PE=1 SV=1 - [DNJA4_HUMAN]                           |
| P25685 | DnaJ homolog subfamily B member 1 OS=Homo sapiens GN=DNAJB1 PE=1 SV=4 - [DNJB1_HUMAN]                           |
| Q8WWF6 | DnaJ homolog subfamily B member 3 OS=Homo sapiens GN=DNAJB3 PE=1 SV=1 - [DNJB3_HUMAN]                           |
| Q96KC8 | DnaJ homolog subfamily C member 1 OS=Homo sapiens GN=DNAJC1 PE=1 SV=1 - [DNJC1_HUMAN]                           |
| O75937 | DnaJ homolog subfamily C member 8 OS=Homo sapiens GN=DNAJC8 PE=1 SV=2 - [DNJC8_HUMAN]                           |
| Q8WXX5 | DnaJ homolog subfamily C member 9 OS=Homo sapiens GN=DNAJC9 PE=1 SV=1 - [DNJC9_HUMAN]                           |
| P49959 | Double-strand break repair protein MRE11A OS=Homo sapiens GN=MRE11A PE=1 SV=3 - [MRE11_HUMAN]                   |
| O60216 | Double-strand-break repair protein rad21 homolog OS=Homo sapiens GN=RAD21 PE=1 SV=2 - [RAD21_HUMAN]             |
| Q9UJU6 | Drebrin-like protein OS=Homo sapiens GN=DBNL PE=1 SV=1 - [DBNL_HUMAN]                                           |
| P36507 | Dual specificity mitogen-activated protein kinase kinase 2 OS=Homo sapiens GN=MAP2K2 PE=1 SV=1 - [MP2K2_HUMAN]  |
| P46734 | Dual specificity mitogen-activated protein kinase kinase 3 OS=Homo sapiens GN=MAP2K3 PE=1 SV=2 - [MP2K3_HUMAN]  |
| Q4G0W2 | Dual specificity phosphatase 28 OS=Homo sapiens GN=DUSP28 PE=2 SV=1 - [DUS28_HUMAN]                             |
| Q9NR20 | Dual specificity tyrosine-phosphorylation-regulated kinase 4 OS=Homo sapiens GN=DYRK4 PE=1 SV=2 - [DYRK4_HUMAN] |
| Q8IVF4 | Dynein heavy chain 10, axonemal OS=Homo sapiens GN=DNAH10 PE=1 SV=4 - [DYH10_HUMAN]                             |

|        |                                                                                                                                            |
|--------|--------------------------------------------------------------------------------------------------------------------------------------------|
| P63167 | Dynein light chain 1, cytoplasmic OS=Homo sapiens GN=DYNLL1 PE=1 SV=1 - [DYL1_HUMAN]                                                       |
| Q96FJ2 | Dynein light chain 2, cytoplasmic OS=Homo sapiens GN=DYNLL2 PE=1 SV=1 - [DYL2_HUMAN]                                                       |
| Q8WXU2 | Dyslexia susceptibility 1 candidate gene 1 protein OS=Homo sapiens GN=DYX1C1 PE=1 SV=2 - [DYXC1_HUMAN]                                     |
| Q14118 | Dystroglycan OS=Homo sapiens GN=DAG1 PE=1 SV=2 - [DAG1_HUMAN]                                                                              |
| O95376 | E3 ubiquitin-protein ligase ARIH2 OS=Homo sapiens GN=ARIH2 PE=1 SV=1 - [ARI2_HUMAN]                                                        |
| Q9P0J7 | E3 ubiquitin-protein ligase KCMF1 OS=Homo sapiens GN=KCMF1 PE=1 SV=2 - [KCMF1_HUMAN]                                                       |
| Q5XPI4 | E3 ubiquitin-protein ligase RNF123 OS=Homo sapiens GN=RNF123 PE=1 SV=1 - [RN123_HUMAN]                                                     |
| Q9HAU4 | E3 ubiquitin-protein ligase SMURF2 OS=Homo sapiens GN=SMURF2 PE=1 SV=1 - [SMUF2_HUMAN]                                                     |
| Q96F44 | E3 ubiquitin-protein ligase TRIM11 OS=Homo sapiens GN=TRIM11 PE=1 SV=2 - [TRI11_HUMAN]                                                     |
| Q5T4S7 | E3 ubiquitin-protein ligase UBR4 OS=Homo sapiens GN=UBR4 PE=1 SV=1 - [UBR4_HUMAN]                                                          |
| Q4VBZ6 | EEF1D protein OS=Homo sapiens GN=EEF1D PE=1 SV=1 - [Q4VBZ6_HUMAN]                                                                          |
| Q9BSW2 | EF-hand calcium-binding domain-containing protein 4B OS=Homo sapiens GN=EFCAB4B PE=1 SV=1 - [EFC4B_HUMAN]                                  |
| Q2Y0W8 | Electroneutral sodium bicarbonate exchanger 1 OS=Homo sapiens GN=SLC4A8 PE=1 SV=1 - [S4A8_HUMAN]                                           |
| P68104 | Elongation factor 1-alpha 1 OS=Homo sapiens GN=EEF1A1 PE=1 SV=1 - [EF1A1_HUMAN]                                                            |
| P24534 | Elongation factor 1-beta OS=Homo sapiens GN=EEF1B2 PE=1 SV=3 - [EF1B_HUMAN]                                                                |
| P26641 | Elongation factor 1-gamma OS=Homo sapiens GN=EEF1G PE=1 SV=3 - [EF1G_HUMAN]                                                                |
| P13639 | Elongation factor 2 OS=Homo sapiens GN=EEF2 PE=1 SV=4 - [EF2_HUMAN]                                                                        |
| Q7L9B9 | Endonuclease/exonuclease/phosphatase family domain-containing protein 1 OS=Homo sapiens GN=EEPDP1 PE=1 SV=2 - [EEPDP1_HUMAN]               |
| P14625 | Endoplasmic OS=Homo sapiens GN=HSP90B1 PE=1 SV=1 - [ENPL_HUMAN]                                                                            |
| P24530 | Endothelin B receptor OS=Homo sapiens GN=EDNRB PE=1 SV=1 - [EDNRB_HUMAN]                                                                   |
| Q96F86 | Enhancer of mRNA-decapping protein 3 OS=Homo sapiens GN=EDC3 PE=1 SV=1 - [EDC3_HUMAN]                                                      |
| P84090 | Enhancer of rudimentary homolog OS=Homo sapiens GN=ERH PE=1 SV=1 - [ERH_HUMAN]                                                             |
| B7Z2X9 | Enolase OS=Homo sapiens GN=ENO2 PE=2 SV=1 - [B7Z2X9_HUMAN]                                                                                 |
| P98073 | Enteropeptidase OS=Homo sapiens GN=TMPRSS15 PE=2 SV=3 - [ENTK_HUMAN]                                                                       |
| A7E2D7 | EP400 protein (Fragment) OS=Homo sapiens GN=EP400 PE=2 SV=1 - [A7E2D7_HUMAN]                                                               |
| Q96CG1 | ETF1 protein OS=Homo sapiens GN=ETF1 PE=2 SV=1 - [Q96CG1_HUMAN]                                                                            |
| Q99447 | Ethanolamine-phosphate cytidyltransferase OS=Homo sapiens GN=PCYT2 PE=1 SV=1 - [PCY2_HUMAN]                                                |
| P60842 | Eukaryotic initiation factor 4A-I OS=Homo sapiens GN=EIF4A1 PE=1 SV=1 - [IF4A1_HUMAN]                                                      |
| P38919 | Eukaryotic initiation factor 4A-III OS=Homo sapiens GN=EIF4A3 PE=1 SV=4 - [IF4A3_HUMAN]                                                    |
| O14602 | Eukaryotic translation initiation factor 1A, Y-chromosomal OS=Homo sapiens GN=EIF1AY PE=1 SV=4 - [IF1AY_HUMAN]                             |
| P05198 | Eukaryotic translation initiation factor 2 subunit 1 OS=Homo sapiens GN=EIF2S1 PE=1 SV=3 - [IF2A_HUMAN]                                    |
| P20042 | Eukaryotic translation initiation factor 2 subunit 2 OS=Homo sapiens GN=EIF2S2 PE=1 SV=2 - [IF2B_HUMAN]                                    |
| P41091 | Eukaryotic translation initiation factor 2 subunit 3 OS=Homo sapiens GN=EIF2S3 PE=1 SV=3 - [IF2G_HUMAN]                                    |
| Q9BQI3 | Eukaryotic translation initiation factor 2-alpha kinase 1 OS=Homo sapiens GN=EIF2AK1 PE=1 SV=2 - [E2AK1_HUMAN]                             |
| O75821 | Eukaryotic translation initiation factor 3 subunit G OS=Homo sapiens GN=EIF3G PE=1 SV=2 - [EIF3G_HUMAN]                                    |
| Q13347 | Eukaryotic translation initiation factor 3 subunit I OS=Homo sapiens GN=EIF3I PE=1 SV=1 - [EIF3I_HUMAN]                                    |
| O75822 | Eukaryotic translation initiation factor 3 subunit J OS=Homo sapiens GN=EIF3J PE=1 SV=2 - [EIF3J_HUMAN]                                    |
| B0QYA6 | Eukaryotic translation initiation factor 3, subunit D (Fragment) OS=Homo sapiens GN=EIF3D PE=4 SV=1 - [B0QYA6_HUMAN]                       |
| E2QC29 | Eukaryotic translation initiation factor 3, subunit E interacting protein (Fragment) OS=Homo sapiens GN=EIF3EIP PE=4 SV=1 - [E2QC29_HUMAN] |
| P06730 | Eukaryotic translation initiation factor 4E OS=Homo sapiens GN=EIF4E PE=1 SV=2 - [IF4E_HUMAN]                                              |
| Q13541 | Eukaryotic translation initiation factor 4E-binding protein 1 OS=Homo sapiens GN=EIF4EBP1 PE=1 SV=3 - [4EBP1_HUMAN]                        |
| Q15056 | Eukaryotic translation initiation factor 4H OS=Homo sapiens GN=EIF4H PE=1 SV=5 - [IF4H_HUMAN]                                              |
| P55010 | Eukaryotic translation initiation factor 5 OS=Homo sapiens GN=EIF5 PE=1 SV=2 - [IF5_HUMAN]                                                 |

|        |                                                                                                                   |
|--------|-------------------------------------------------------------------------------------------------------------------|
| P63241 | Eukaryotic translation initiation factor 5A-1 OS=Homo sapiens GN=EIF5A PE=1 SV=2 - [IF5A1_HUMAN]                  |
| O60841 | Eukaryotic translation initiation factor 5B OS=Homo sapiens GN=EIF5B PE=1 SV=4 - [IF2P_HUMAN]                     |
| B7ZBH1 | Eukaryotic translation initiation factor 6 (Fragment) OS=Homo sapiens GN=EIF6 PE=4 SV=1 - [B7ZBH1_HUMAN]          |
| O00471 | Exocyst complex component 5 OS=Homo sapiens GN=EXOC5 PE=1 SV=1 - [EXOC5_HUMAN]                                    |
| O14980 | Exportin-1 OS=Homo sapiens GN=XPO1 PE=1 SV=1 - [XPO1_HUMAN]                                                       |
| A8CZ64 | Extracellular signal-regulated kinase-2 splice variant OS=Homo sapiens GN=MAPK1 PE=2 SV=1 - [A8CZ64_HUMAN]        |
| P52907 | F-actin-capping protein subunit alpha-1 OS=Homo sapiens GN=CAPZA1 PE=1 SV=3 - [CAZA1_HUMAN]                       |
| Q5TI86 | F-box protein 7 OS=Homo sapiens GN=FBXO7 PE=2 SV=1 - [Q5TI86_HUMAN]                                               |
| B1AJQ5 | Family with sequence similarity 76, member A (Fragment) OS=Homo sapiens GN=FAM76A PE=4 SV=1 - [B1AJQ5_HUMAN]      |
| Q9Y2M0 | Fanconi-associated nuclease 1 OS=Homo sapiens GN=FAN1 PE=1 SV=4 - [FAN1_HUMAN]                                    |
| Q16658 | Fascin OS=Homo sapiens GN=FSCN1 PE=1 SV=3 - [FSCN1_HUMAN]                                                         |
| P49327 | Fatty acid synthase OS=Homo sapiens GN=FASN PE=1 SV=3 - [FAS_HUMAN]                                               |
| Q01469 | Fatty acid-binding protein, epidermal OS=Homo sapiens GN=FABP5 PE=1 SV=3 - [FABP5_HUMAN]                          |
| Q5SYB0 | FERM and PDZ domain-containing protein 1 OS=Homo sapiens GN=FRMPD1 PE=1 SV=1 - [FRPD1_HUMAN]                      |
| P02792 | Ferritin light chain OS=Homo sapiens GN=FTL PE=1 SV=2 - [FRIL_HUMAN]                                              |
| P11487 | Fibroblast growth factor 3 OS=Homo sapiens GN=FGF3 PE=1 SV=1 - [FGF3_HUMAN]                                       |
| A6NDY9 | Filamin A OS=Homo sapiens GN=FLNA PE=2 SV=4 - [A6NDY9_HUMAN]                                                      |
| Q1JUQ5 | FK506 binding protein12 OS=Homo sapiens GN=FKBP12-Exp2 PE=2 SV=1 - [Q1JUQ5_HUMAN]                                 |
| P30043 | Flavin reductase OS=Homo sapiens GN=BLVRB PE=1 SV=3 - [BLVRB_HUMAN]                                               |
| P04075 | Fructose-bisphosphate aldolase A OS=Homo sapiens GN=ALDOA PE=1 SV=2 - [ALDOA_HUMAN]                               |
| P09972 | Fructose-bisphosphate aldolase C OS=Homo sapiens GN=ALDOC PE=1 SV=2 - [ALDOC_HUMAN]                               |
| B7ZM02 | FSD2 protein OS=Homo sapiens GN=FSD2 PE=2 SV=1 - [B7ZM02_HUMAN]                                                   |
| Q9H9S5 | Fukutin-related protein OS=Homo sapiens GN=FKRP PE=1 SV=1 - [FKRP_HUMAN]                                          |
| P07954 | Fumarate hydratase, mitochondrial OS=Homo sapiens GN=FH PE=1 SV=3 - [FUMH_HUMAN]                                  |
| Q96GK7 | Fumarylacetoacetate hydrolase domain-containing protein 2A OS=Homo sapiens GN=FAHD2A PE=1 SV=1 - [FAH2A_HUMAN]    |
| E7ET32 | Galactose-1-phosphate uridylyltransferase OS=Homo sapiens GN=GALT PE=3 SV=1 - [E7ET32_HUMAN]                      |
| P09382 | Galectin-1 OS=Homo sapiens GN=LGALS1 PE=1 SV=2 - [LEG1_HUMAN]                                                     |
| P17931 | Galectin-3 OS=Homo sapiens GN=LGALS3 PE=1 SV=5 - [LEG3_HUMAN]                                                     |
| P60520 | Gamma-aminobutyric acid receptor-associated protein-like 2 OS=Homo sapiens GN=GABARAPL2 PE=1 SV=1 - [GBRL2_HUMAN] |
| Q13630 | GDP-L-fucose synthase OS=Homo sapiens GN=TSTA3 PE=1 SV=1 - [FCL_HUMAN]                                            |
| P53609 | Geranylgeranyl transferase type-1 subunit beta OS=Homo sapiens GN=PGGT1B PE=1 SV=2 - [PGTB1_HUMAN]                |
| Q92696 | Geranylgeranyl transferase type-2 subunit alpha OS=Homo sapiens GN=RABGGTA PE=1 SV=2 - [PGTA_HUMAN]               |
| Q6PCE3 | Glucose 1,6-bisphosphate synthase OS=Homo sapiens GN=PGM2L1 PE=1 SV=3 - [PGM2L_HUMAN]                             |
| P11413 | Glucose-6-phosphate 1-dehydrogenase OS=Homo sapiens GN=G6PD PE=1 SV=4 - [G6PD_HUMAN]                              |
| P06744 | Glucose-6-phosphate isomerase OS=Homo sapiens GN=GPI PE=1 SV=4 - [G6PI_HUMAN]                                     |
| P48058 | Glutamate receptor 4 OS=Homo sapiens GN=GRIA4 PE=2 SV=2 - [GRIA4_HUMAN]                                           |
| P48506 | Glutamate--cysteine ligase catalytic subunit OS=Homo sapiens GN=GCLC PE=1 SV=2 - [GSH1_HUMAN]                     |
| P48507 | Glutamate--cysteine ligase regulatory subunit OS=Homo sapiens GN=GCLM PE=1 SV=1 - [GSH0_HUMAN]                    |
| P15104 | Glutamine synthetase OS=Homo sapiens GN=GLUL PE=1 SV=4 - [GLNA_HUMAN]                                             |
| P35754 | Glutaredoxin-1 OS=Homo sapiens GN=GLRX PE=1 SV=2 - [GLRX1_HUMAN]                                                  |
| O76003 | Glutaredoxin-3 OS=Homo sapiens GN=GLRX3 PE=1 SV=2 - [GLRX3_HUMAN]                                                 |
| C8KIL8 | Glutathion reductase delta8 alternative splicing variant OS=Homo sapiens GN=GSR PE=2 SV=1 - [C8KIL8_HUMAN]        |
| P07203 | Glutathione peroxidase 1 OS=Homo sapiens GN=GPX1 PE=1 SV=4 - [GPX1_HUMAN]                                         |

|        |                                                                                                                     |
|--------|---------------------------------------------------------------------------------------------------------------------|
| P21266 | Glutathione S-transferase Mu 3 OS=Homo sapiens GN=GSTM3 PE=1 SV=3 - [GSTM3_HUMAN]                                   |
| P78417 | Glutathione S-transferase omega-1 OS=Homo sapiens GN=GSTO1 PE=1 SV=2 - [GSTO1_HUMAN]                                |
| P48637 | Glutathione synthetase OS=Homo sapiens GN=GSS PE=1 SV=1 - [GSHB_HUMAN]                                              |
| P04406 | Glyceraldehyde-3-phosphate dehydrogenase OS=Homo sapiens GN=GAPDH PE=1 SV=3 - [G3P_HUMAN]                           |
| P35573 | Glycogen debranching enzyme OS=Homo sapiens GN=AGL PE=1 SV=3 - [GDE_HUMAN]                                          |
| P04921 | Glycophorin-C OS=Homo sapiens GN=GYPC PE=1 SV=1 - [GLPC_HUMAN]                                                      |
| P41250 | Glycyl-tRNA synthetase OS=Homo sapiens GN=GARS PE=1 SV=3 - [SYG_HUMAN]                                              |
| Q9UBQ7 | Glyoxylate reductase/hydroxypyruvate reductase OS=Homo sapiens GN=GRHPR PE=1 SV=1 - [GRHPR_HUMAN]                   |
| P36959 | GMP reductase 1 OS=Homo sapiens GN=GMPR PE=1 SV=1 - [GMPR1_HUMAN]                                                   |
| Q86T14 | GMP reductase OS=Homo sapiens GN=GMPR2 PE=2 SV=1 - [Q86T14_HUMAN]                                                   |
| Q08378 | Golgin subfamily A member 3 OS=Homo sapiens GN=GOLGA3 PE=1 SV=2 - [GOGA3_HUMAN]                                     |
| Q14789 | Golgin subfamily B member 1 OS=Homo sapiens GN=GOLGB1 PE=1 SV=2 - [GOGB1_HUMAN]                                     |
| B3KUR5 | GRAM domain containing 1C, isoform CRA_d OS=Homo sapiens GN=GRAMD1C PE=2 SV=1 - [B3KUR5_HUMAN]                      |
| Q5VT94 | Growth hormone inducible transmembrane protein OS=Homo sapiens GN=GHITM PE=2 SV=1 - [Q5VT94_HUMAN]                  |
| P62826 | GTP-binding nuclear protein Ran OS=Homo sapiens GN=RAN PE=1 SV=3 - [RAN_HUMAN]                                      |
| O00178 | GTP-binding protein 1 OS=Homo sapiens GN=GTPBP1 PE=1 SV=3 - [GTPB1_HUMAN]                                           |
| O75628 | GTP-binding protein REM 1 OS=Homo sapiens GN=REM1 PE=1 SV=2 - [REM1_HUMAN]                                          |
| Q96F15 | GTPase IMAP family member 5 OS=Homo sapiens GN=GIMAP5 PE=2 SV=1 - [GIMA5_HUMAN]                                     |
| Q8ND71 | GTPase IMAP family member 8 OS=Homo sapiens GN=GIMAP8 PE=1 SV=2 - [GIMA8_HUMAN]                                     |
| Q14C86 | GTPase-activating protein and VPS9 domain-containing protein 1 OS=Homo sapiens GN=GAPVD1 PE=1 SV=2 - [GAPD1_HUMAN]  |
| Q8TBN0 | Guanine nucleotide exchange factor for Rab-3A OS=Homo sapiens GN=RAB3IL1 PE=1 SV=1 - [R3GEF_HUMAN]                  |
| P63244 | Guanine nucleotide-binding protein subunit beta-2-like 1 OS=Homo sapiens GN=GNB2L1 PE=1 SV=3 - [GBLP_HUMAN]         |
| Q16774 | Guanylate kinase OS=Homo sapiens GN=GUK1 PE=1 SV=2 - [KGUA_HUMAN]                                                   |
| Q96PP9 | Guanylate-binding protein 4 OS=Homo sapiens GN=GBP4 PE=1 SV=2 - [GBP4_HUMAN]                                        |
| Q9H0R4 | Haloacid dehalogenase-like hydrolase domain-containing protein 2 OS=Homo sapiens GN=HDHD2 PE=1 SV=1 - [HDHD2_HUMAN] |
| Q9Y450 | HBS1-like protein OS=Homo sapiens GN=HBS1L PE=1 SV=1 - [HBS1L_HUMAN]                                                |
| D3DTT2 | HCG1820468, isoform CRA_a OS=Homo sapiens GN=FAM18B2 PE=4 SV=1 - [D3DTT2_HUMAN]                                     |
| Q2YDC2 | HCG1985580, isoform CRA_f OS=Homo sapiens GN=PDCC6 PE=2 SV=1 - [Q2YDC2_HUMAN]                                       |
| B4DHA4 | HCG2031650, isoform CRA_f OS=Homo sapiens GN=NSUN4 PE=2 SV=1 - [B4DHA4_HUMAN]                                       |
| Q7Z4H3 | HD domain-containing protein 2 OS=Homo sapiens GN=HDDC2 PE=1 SV=1 - [HDDC2_HUMAN]                                   |
| Q5T3Q7 | HEAT repeat containing 1 OS=Homo sapiens GN=HEATR1 PE=2 SV=1 - [Q5T3Q7_HUMAN]                                       |
| B8ZZL8 | Heat shock 10kDa protein 1 (Chaperonin 10), isoform CRA_b OS=Homo sapiens GN=HSPE1 PE=3 SV=1 - [B8ZZL8_HUMAN]       |
| P34931 | Heat shock 70 kDa protein 1-like OS=Homo sapiens GN=HSPA1L PE=1 SV=2 - [HS71L_HUMAN]                                |
| P08107 | Heat shock 70 kDa protein 1A/1B OS=Homo sapiens GN=HSPA1A PE=1 SV=5 - [HSP71_HUMAN]                                 |
| P34932 | Heat shock 70 kDa protein 4 OS=Homo sapiens GN=HSPA4 PE=1 SV=4 - [HSP74_HUMAN]                                      |
| P11142 | Heat shock cognate 71 kDa protein OS=Homo sapiens GN=HSPA8 PE=1 SV=1 - [HSP7C_HUMAN]                                |
| Q92598 | Heat shock protein 105 kDa OS=Homo sapiens GN=HSPH1 PE=1 SV=1 - [HS105_HUMAN]                                       |
| P07900 | Heat shock protein HSP 90-alpha OS=Homo sapiens GN=HSP90AA1 PE=1 SV=5 - [HS90A_HUMAN]                               |
| P08238 | Heat shock protein HSP 90-beta OS=Homo sapiens GN=HSP90AB1 PE=1 SV=4 - [HS90B_HUMAN]                                |
| Q9NRV9 | Heme-binding protein 1 OS=Homo sapiens GN=HEBP1 PE=1 SV=1 - [HEBP1_HUMAN]                                           |
| A8K466 | Hemochromatosis type 2 (Juvenile) OS=Homo sapiens GN=HFE2 PE=2 SV=1 - [A8K466_HUMAN]                                |
| Q9BXL5 | Hemogen OS=Homo sapiens GN=HEMGN PE=1 SV=1 - [HEMGN_HUMAN]                                                          |
| P69905 | Hemoglobin subunit alpha OS=Homo sapiens GN=HBA1 PE=1 SV=2 - [HBA_HUMAN]                                            |



|        |                                                                                                                             |
|--------|-----------------------------------------------------------------------------------------------------------------------------|
| P68871 | Hemoglobin subunit beta OS=Homo sapiens GN=HBB PE=1 SV=2 - [HBB_HUMAN]                                                      |
| P02042 | Hemoglobin subunit delta OS=Homo sapiens GN=HBD PE=1 SV=2 - [HBD_HUMAN]                                                     |
| P02100 | Hemoglobin subunit epsilon OS=Homo sapiens GN=HBE1 PE=1 SV=2 - [HBE_HUMAN]                                                  |
| P69891 | Hemoglobin subunit gamma-1 OS=Homo sapiens GN=HBG1 PE=1 SV=2 - [HBG1_HUMAN]                                                 |
| P69892 | Hemoglobin subunit gamma-2 OS=Homo sapiens GN=HBG2 PE=1 SV=2 - [HBG2_HUMAN]                                                 |
| Q6B0K9 | Hemoglobin subunit mu OS=Homo sapiens GN=HBM PE=2 SV=1 - [HBM_HUMAN]                                                        |
| P09105 | Hemoglobin subunit theta-1 OS=Homo sapiens GN=HBQ1 PE=1 SV=2 - [HBAT_HUMAN]                                                 |
| P02008 | Hemoglobin subunit zeta OS=Homo sapiens GN=HBZ PE=1 SV=2 - [HBAZ_HUMAN]                                                     |
| D9YZU8 | Hemoglobin, gamma A OS=Homo sapiens GN=HBG1 PE=3 SV=1 - [D9YZU8_HUMAN]                                                      |
| P51858 | Hepatoma-derived growth factor OS=Homo sapiens GN=HDGF PE=1 SV=1 - [HDGF_HUMAN]                                             |
| B0QZK4 | Heterochromatin protein 1, binding protein 3 (Fragment) OS=Homo sapiens GN=HP1BP3 PE=3 SV=1 - [B0QZK4_HUMAN]                |
| P09651 | Heterogeneous nuclear ribonucleoprotein A1 OS=Homo sapiens GN=HNRNPA1 PE=1 SV=5 - [ROA1_HUMAN]                              |
| O60812 | Heterogeneous nuclear ribonucleoprotein C-like 1 OS=Homo sapiens GN=HNRNPCL1 PE=1 SV=1 - [HNRCL_HUMAN]                      |
| O14979 | Heterogeneous nuclear ribonucleoprotein D-like OS=Homo sapiens GN=HNRPDL PE=1 SV=3 - [HNRDL_HUMAN]                          |
| P31942 | Heterogeneous nuclear ribonucleoprotein H3 OS=Homo sapiens GN=HNRNPH3 PE=1 SV=2 - [HNRH3_HUMAN]                             |
| P52272 | Heterogeneous nuclear ribonucleoprotein M OS=Homo sapiens GN=HNRNPM PE=1 SV=3 - [HNRPM_HUMAN]                               |
| O60506 | Heterogeneous nuclear ribonucleoprotein Q OS=Homo sapiens GN=SYNCRIP PE=1 SV=2 - [HNRPQ_HUMAN]                              |
| P22626 | Heterogeneous nuclear ribonucleoproteins A2/B1 OS=Homo sapiens GN=HNRNPA2B1 PE=1 SV=2 - [ROA2_HUMAN]                        |
| P26583 | High mobility group protein B2 OS=Homo sapiens GN=HMGB2 PE=1 SV=2 - [HMGB2_HUMAN]                                           |
| Q5T7C0 | High-mobility group box 1 (Fragment) OS=Homo sapiens GN=HMGB1 PE=2 SV=1 - [Q5T7C0_HUMAN]                                    |
| P49773 | Histidine triad nucleotide-binding protein 1 OS=Homo sapiens GN=HINT1 PE=1 SV=2 - [HINT1_HUMAN]                             |
| P16403 | Histone H1.2 OS=Homo sapiens GN=HIST1H1C PE=1 SV=2 - [H12_HUMAN]                                                            |
| P10412 | Histone H1.4 OS=Homo sapiens GN=HIST1H1E PE=1 SV=2 - [H14_HUMAN]                                                            |
| P16401 | Histone H1.5 OS=Homo sapiens GN=HIST1H1B PE=1 SV=3 - [H15_HUMAN]                                                            |
| Q96KK5 | Histone H2A type 1-H OS=Homo sapiens GN=HIST1H2AH PE=1 SV=3 - [H2A1H_HUMAN]                                                 |
| O60814 | Histone H2B type 1-K OS=Homo sapiens GN=HIST1H2BK PE=1 SV=3 - [H2B1K_HUMAN]                                                 |
| P68431 | Histone H3.1 OS=Homo sapiens GN=HIST1H3A PE=1 SV=2 - [H31_HUMAN]                                                            |
| P62805 | Histone H4 OS=Homo sapiens GN=HIST1H4A PE=1 SV=2 - [H4_HUMAN]                                                               |
| Q86X55 | Histone-arginine methyltransferase CARM1 OS=Homo sapiens GN=CARM1 PE=1 SV=3 - [CARM1_HUMAN]                                 |
| Q96L73 | Histone-lysine N-methyltransferase, H3 lysine-36 and H4 lysine-20 specific OS=Homo sapiens GN=NSD1 PE=1 SV=1 - [NSD1_HUMAN] |
| B0V2L0 | HLA-B associated transcript 1 (Fragment) OS=Homo sapiens GN=BAT1 PE=4 SV=1 - [B0V2L0_HUMAN]                                 |
| B0UX83 | HLA-B associated transcript 3 OS=Homo sapiens GN=BAT3 PE=4 SV=1 - [B0UX83_HUMAN]                                            |
| Q9UBX0 | Homeobox expressed in ES cells 1 OS=Homo sapiens GN=HESX1 PE=1 SV=1 - [HESX1_HUMAN]                                         |
| P39880 | Homeobox protein cut-like 1 OS=Homo sapiens GN=CUX1 PE=1 SV=3 - [CUX1_HUMAN]                                                |
| P56915 | Homeobox protein gooseoid OS=Homo sapiens GN=GSC PE=1 SV=2 - [GSC_HUMAN]                                                    |
| P50502 | Hsc70-interacting protein OS=Homo sapiens GN=ST13 PE=1 SV=2 - [F10A1_HUMAN]                                                 |
| Q16543 | Hsp90 co-chaperone Cdc37 OS=Homo sapiens GN=CDC37 PE=1 SV=1 - [CDC37_HUMAN]                                                 |
| Q16775 | Hydroxyacylglutathione hydrolase, mitochondrial OS=Homo sapiens GN=HAGH PE=1 SV=2 - [GLO2_HUMAN]                            |
| P00492 | Hypoxanthine-guanine phosphoribosyltransferase OS=Homo sapiens GN=HPRT1 PE=1 SV=2 - [HPRT_HUMAN]                            |
| P55899 | IgG receptor FcRn large subunit p51 OS=Homo sapiens GN=FCGRT PE=1 SV=1 - [FCGRN_HUMAN]                                      |
| Q8WZA9 | Immunity-related GTPase family Q protein OS=Homo sapiens GN=IRGQ PE=1 SV=1 - [IRGQ_HUMAN]                                   |
| P78318 | Immunoglobulin-binding protein 1 OS=Homo sapiens GN=IGBP1 PE=1 SV=1 - [IGBP1_HUMAN]                                         |
| O00629 | Importin subunit alpha-4 OS=Homo sapiens GN=KPNA4 PE=1 SV=1 - [IMA4_HUMAN]                                                  |

|        |                                                                                                   |
|--------|---------------------------------------------------------------------------------------------------|
| Q14974 | Importin subunit beta-1 OS=Homo sapiens GN=KPNB1 PE=1 SV=2 - [IMB1_HUMAN]                         |
| O94829 | Importin-13 OS=Homo sapiens GN=IPO13 PE=1 SV=3 - [IPO13_HUMAN]                                    |
| O95373 | Importin-7 OS=Homo sapiens GN=IPO7 PE=1 SV=1 - [IPO7_HUMAN]                                       |
| Q96P70 | Importin-9 OS=Homo sapiens GN=IPO9 PE=1 SV=3 - [IPO9_HUMAN]                                       |
| Q9NQS7 | Inner centromere protein OS=Homo sapiens GN=INCENP PE=1 SV=3 - [INCE_HUMAN]                       |
| Q15181 | Inorganic pyrophosphatase OS=Homo sapiens GN=PPA1 PE=1 SV=2 - [IPYR_HUMAN]                        |
| Q14571 | Inositol 1,4,5-trisphosphate receptor type 2 OS=Homo sapiens GN=ITPR2 PE=1 SV=2 - [ITPR2_HUMAN]   |
| P14735 | Insulin-degrading enzyme OS=Homo sapiens GN=IDE PE=1 SV=4 - [IDE_HUMAN]                           |
| Q8N201 | Integrator complex subunit 1 OS=Homo sapiens GN=INTS1 PE=1 SV=2 - [INT1_HUMAN]                    |
| Q9H0H0 | Integrator complex subunit 2 OS=Homo sapiens GN=INTS2 PE=1 SV=2 - [INT2_HUMAN]                    |
| P80217 | Interferon-induced 35 kDa protein OS=Homo sapiens GN=IFI35 PE=1 SV=5 - [IN35_HUMAN]               |
| P32456 | Interferon-induced guanylate-binding protein 2 OS=Homo sapiens GN=GBP2 PE=2 SV=3 - [GBP2_HUMAN]   |
| Q5JU85 | IQ motif and SEC7 domain-containing protein 2 OS=Homo sapiens GN=IQSEC2 PE=1 SV=1 - [IQEC2_HUMAN] |
| Q9HBB2 | Iron regulatory protein 1 OS=Homo sapiens GN=IRP1 PE=2 SV=1 - [Q9HBB2_HUMAN]                      |
| Q9BZI1 | Iroquois-class homeodomain protein IRX-2 OS=Homo sapiens GN=IRX2 PE=2 SV=2 - [IRX2_HUMAN]         |
| Q2TAA2 | Isoamyl acetate-hydrolyzing esterase 1 homolog OS=Homo sapiens GN=IAH1 PE=1 SV=1 - [IAH1_HUMAN]   |
| Q96CN7 | Isochorismatase domain-containing protein 1 OS=Homo sapiens GN=ISOC1 PE=1 SV=3 - [ISOC1_HUMAN]    |
| O75874 | Isocitrate dehydrogenase [NADP] cytoplasmic OS=Homo sapiens GN=IDH1 PE=1 SV=2 - [IDHC_HUMAN]      |
| Q13907 | Isopentenyl-diphosphate Delta-isomerase 1 OS=Homo sapiens GN=IDI1 PE=1 SV=2 - [IDI1_HUMAN]        |
| Q8IYV9 | Izumo sperm-egg fusion protein 1 OS=Homo sapiens GN=IZUMO1 PE=1 SV=2 - [IZUM1_HUMAN]              |
| Q9P2K6 | Kelch domain-containing protein 5 OS=Homo sapiens GN=KLHDC5 PE=1 SV=2 - [KLDC5_HUMAN]             |
| Q9P2J3 | Kelch-like protein 9 OS=Homo sapiens GN=KLHL9 PE=1 SV=2 - [KLHL9_HUMAN]                           |
| Q8N1A0 | Keratin-like protein KRT222 OS=Homo sapiens GN=KRT222 PE=2 SV=1 - [KT222_HUMAN]                   |
| O76009 | Keratin, type I cuticular Ha3-I OS=Homo sapiens GN=KRT33A PE=1 SV=2 - [KT33A_HUMAN]               |
| O76013 | Keratin, type I cuticular Ha6 OS=Homo sapiens GN=KRT36 PE=1 SV=1 - [KRT36_HUMAN]                  |
| P13645 | Keratin, type I cytoskeletal 10 OS=Homo sapiens GN=KRT10 PE=1 SV=6 - [K1C10_HUMAN]                |
| P08779 | Keratin, type I cytoskeletal 16 OS=Homo sapiens GN=KRT16 PE=1 SV=4 - [K1C16_HUMAN]                |
| P35527 | Keratin, type I cytoskeletal 9 OS=Homo sapiens GN=KRT9 PE=1 SV=3 - [K1C9_HUMAN]                   |
| Q9NSB4 | Keratin, type II cuticular Hb2 OS=Homo sapiens GN=KRT82 PE=1 SV=3 - [KRT82_HUMAN]                 |
| P78385 | Keratin, type II cuticular Hb3 OS=Homo sapiens GN=KRT83 PE=1 SV=2 - [KRT83_HUMAN]                 |
| P04264 | Keratin, type II cytoskeletal 1 OS=Homo sapiens GN=KRT1 PE=1 SV=6 - [K2C1_HUMAN]                  |
| P35908 | Keratin, type II cytoskeletal 2 epidermal OS=Homo sapiens GN=KRT2 PE=1 SV=2 - [K22E_HUMAN]        |
| P12035 | Keratin, type II cytoskeletal 3 OS=Homo sapiens GN=KRT3 PE=1 SV=3 - [K2C3_HUMAN]                  |
| Q7RTS7 | Keratin, type II cytoskeletal 74 OS=Homo sapiens GN=KRT74 PE=1 SV=2 - [K2C74_HUMAN]               |
| O95678 | Keratin, type II cytoskeletal 75 OS=Homo sapiens GN=KRT75 PE=1 SV=2 - [K2C75_HUMAN]               |
| Q6KB66 | Keratin, type II cytoskeletal 80 OS=Homo sapiens GN=KRT80 PE=1 SV=2 - [K2C80_HUMAN]               |
| Q9HA64 | Ketosamine-3-kinase OS=Homo sapiens GN=FN3KRP PE=1 SV=2 - [KT3K_HUMAN]                            |
| A1A5A9 | KIAA0999 protein OS=Homo sapiens GN=KIAA0999 PE=2 SV=1 - [A1A5A9_HUMAN]                           |
| P33176 | Kinesin-1 heavy chain OS=Homo sapiens GN=KIF5B PE=1 SV=1 - [KINH_HUMAN]                           |
| Q96L93 | Kinesin-like protein KIF16B OS=Homo sapiens GN=KIF16B PE=1 SV=2 - [KI16B_HUMAN]                   |
| O60333 | Kinesin-like protein KIF1B OS=Homo sapiens GN=KIF1B PE=1 SV=5 - [KIF1B_HUMAN]                     |
| Q86VH2 | Kinesin-like protein KIF27 OS=Homo sapiens GN=KIF27 PE=2 SV=1 - [KIF27_HUMAN]                     |
| P50748 | Kinetochore-associated protein 1 OS=Homo sapiens GN=KNTC1 PE=1 SV=1 - [KNTC1_HUMAN]               |

|        |                                                                                                                    |
|--------|--------------------------------------------------------------------------------------------------------------------|
| Q9UEF7 | Klotho OS=Homo sapiens GN=KL PE=1 SV=2 - [KLOT_HUMAN]                                                              |
| E1B6W7 | KLRAQ1 protein OS=Homo sapiens GN=KLRAQ1 PE=2 SV=2 - [E1B6W7_HUMAN]                                                |
| B0S8I7 | L antigen family, member 3 OS=Homo sapiens GN=LAGE3 PE=4 SV=1 - [B0S8I7_HUMAN]                                     |
| Q6ZMR3 | L-lactate dehydrogenase A-like 6A OS=Homo sapiens GN=LDHAL6A PE=2 SV=1 - [LDH6A_HUMAN]                             |
| P07195 | L-lactate dehydrogenase B chain OS=Homo sapiens GN=LDHB PE=1 SV=2 - [LDHB_HUMAN]                                   |
| E9PH51 | L-lactate dehydrogenase OS=Homo sapiens GN=LDHA PE=3 SV=2 - [E9PH51_HUMAN]                                         |
| Q7Z4W1 | L-xylulose reductase OS=Homo sapiens GN=DCXR PE=1 SV=2 - [DCXR_HUMAN]                                              |
| Q04760 | Lactoylglutathione lyase OS=Homo sapiens GN=GLO1 PE=1 SV=4 - [LGUL_HUMAN]                                          |
| Q03252 | Lamin-B2 OS=Homo sapiens GN=LMNB2 PE=1 SV=3 - [LMNB2_HUMAN]                                                        |
| Q59G12 | Lamina-associated polypeptide 2, isoforms beta/gamma variant (Fragment) OS=Homo sapiens PE=2 SV=1 - [Q59G12_HUMAN] |
| Q16363 | Laminin subunit alpha-4 OS=Homo sapiens GN=LAMA4 PE=1 SV=4 - [LAMA4_HUMAN]                                         |
| Q9Y6N6 | Laminin subunit gamma-3 OS=Homo sapiens GN=LAMC3 PE=2 SV=3 - [LAMC3_HUMAN]                                         |
| Q9NS86 | LanC-like protein 2 OS=Homo sapiens GN=LANCL2 PE=1 SV=1 - [LANC2_HUMAN]                                            |
| Q01650 | Large neutral amino acids transporter small subunit 1 OS=Homo sapiens GN=SLC7A5 PE=1 SV=2 - [LAT1_HUMAN]           |
| Q9BS40 | Latexin OS=Homo sapiens GN=LXN PE=1 SV=2 - [LXN_HUMAN]                                                             |
| Q9Y468 | Lethal(3)malignant brain tumor-like protein 1 OS=Homo sapiens GN=L3MBTL1 PE=1 SV=3 - [LMBL1_HUMAN]                 |
| Q9UIC8 | Leucine carboxyl methyltransferase 1 OS=Homo sapiens GN=LCMT1 PE=1 SV=2 - [LCMT1_HUMAN]                            |
| Q9Y608 | Leucine-rich repeat flightless-interacting protein 2 OS=Homo sapiens GN=LRRFIP2 PE=1 SV=1 - [LRRF2_HUMAN]          |
| Q8N1G4 | Leucine-rich repeat-containing protein 47 OS=Homo sapiens GN=LRRC47 PE=1 SV=1 - [LRC47_HUMAN]                      |
| Q96JA1 | Leucine-rich repeats and immunoglobulin-like domains protein 1 OS=Homo sapiens GN=LRIG1 PE=1 SV=2 - [LRIG1_HUMAN]  |
| P09960 | Leukotriene A-4 hydrolase OS=Homo sapiens GN=LTA4H PE=1 SV=2 - [LKHA4_HUMAN]                                       |
| Q14847 | LIM and SH3 domain protein 1 OS=Homo sapiens GN=LASP1 PE=1 SV=2 - [LASP1_HUMAN]                                    |
| Q9GZY6 | Linker for activation of T-cells family member 2 OS=Homo sapiens GN=LAT2 PE=1 SV=1 - [NTAL_HUMAN]                  |
| P24666 | Low molecular weight phosphotyrosine protein phosphatase OS=Homo sapiens GN=ACP1 PE=1 SV=3 - [PPAC_HUMAN]          |
| P05455 | Lupus La protein OS=Homo sapiens GN=SSB PE=1 SV=2 - [LA_HUMAN]                                                     |
| Q5QPQ1 | Lysophospholipase II (Fragment) OS=Homo sapiens GN=LYPLA2 PE=2 SV=1 - [Q5QPQ1_HUMAN]                               |
| P14174 | Macrophage migration inhibitory factor OS=Homo sapiens GN=MIF PE=1 SV=4 - [MIF_HUMAN]                              |
| P40925 | Malate dehydrogenase, cytoplasmic OS=Homo sapiens GN=MDH1 PE=1 SV=4 - [MDHC_HUMAN]                                 |
| Q6P052 | MAN1A1 protein OS=Homo sapiens GN=MAN1A1 PE=2 SV=1 - [Q6P052_HUMAN]                                                |
| A4D2A2 | MCM7 minichromosome maintenance deficient 7 (S. cerevisiae) OS=Homo sapiens GN=MCM7 PE=2 SV=1 - [A4D2A2_HUMAN]     |
| Q9UHV7 | Mediator of RNA polymerase II transcription subunit 13 OS=Homo sapiens GN=MED13 PE=1 SV=3 - [MED13_HUMAN]          |
| Q969V1 | Melanin-concentrating hormone receptor 2 OS=Homo sapiens GN=MCHR2 PE=1 SV=1 - [MCHR2_HUMAN]                        |
| P02795 | Metallothionein-2 OS=Homo sapiens GN=MT2A PE=1 SV=1 - [MT2_HUMAN]                                                  |
| P50579 | Methionine aminopeptidase 2 OS=Homo sapiens GN=METAP2 PE=1 SV=1 - [AMPM2_HUMAN]                                    |
| Q9BV20 | Methylthioribose-1-phosphate isomerase OS=Homo sapiens GN=MRI1 PE=1 SV=1 - [MTNA_HUMAN]                            |
| D3YTD2 | MICAL-like 2, isoform CRA_a OS=Homo sapiens GN=MICALL2 PE=4 SV=1 - [D3YTD2_HUMAN]                                  |
| Q8WYQ5 | Microprocessor complex subunit DGCR8 OS=Homo sapiens GN=DGCR8 PE=1 SV=1 - [DGCR8_HUMAN]                            |
| P78559 | Microtubule-associated protein 1A OS=Homo sapiens GN=MAP1A PE=1 SV=6 - [MAP1A_HUMAN]                               |
| Q15691 | Microtubule-associated protein RP/EB family member 1 OS=Homo sapiens GN=MAPRE1 PE=1 SV=3 - [MARE1_HUMAN]           |
| Q7Z6P5 | Minichromosome maintenance complex component 3 (Fragment) OS=Homo sapiens GN=MCM3 PE=2 SV=1 - [Q7Z6P5_HUMAN]       |
| Q9Y3D6 | Mitochondrial fission 1 protein OS=Homo sapiens GN=FIS1 PE=1 SV=2 - [FIS1_HUMAN]                                   |
| Q15785 | Mitochondrial import receptor subunit TOM34 OS=Homo sapiens GN=TOMM34 PE=1 SV=2 - [TOM34_HUMAN]                    |
| Q99797 | Mitochondrial intermediate peptidase OS=Homo sapiens GN=MIPEP PE=1 SV=2 - [MIPEP_HUMAN]                            |

|        |                                                                                                                                          |
|--------|------------------------------------------------------------------------------------------------------------------------------------------|
| Q8TD08 | Mitogen-activated protein kinase 15 OS=Homo sapiens GN=MAPK15 PE=1 SV=1 - [MK15_HUMAN]                                                   |
| Q12852 | Mitogen-activated protein kinase kinase kinase 12 OS=Homo sapiens GN=MAP3K12 PE=1 SV=2 - [M3K12_HUMAN]                                   |
| Q9ULH7 | MKL/myocardin-like protein 2 OS=Homo sapiens GN=MKL2 PE=1 SV=3 - [MKL2_HUMAN]                                                            |
| P26038 | Moesin OS=Homo sapiens GN=MSN PE=1 SV=3 - [MOES_HUMAN]                                                                                   |
| Q2QL34 | Mpv17-like protein OS=Homo sapiens GN=MPV17L PE=1 SV=1 - [MP17L_HUMAN]                                                                   |
| B5AK60 | Multidrug resistance protein 1 OS=Homo sapiens GN=ABCB1 PE=2 SV=1 - [B5AK60_HUMAN]                                                       |
| Q5T3U5 | Multidrug resistance-associated protein 7 OS=Homo sapiens GN=ABCC10 PE=1 SV=1 - [MRP7_HUMAN]                                             |
| Q7Z7M0 | Multiple epidermal growth factor-like domains protein 8 OS=Homo sapiens GN=MEGF8 PE=1 SV=2 - [MEGF8_HUMAN]                               |
| P60201 | Myelin proteolipid protein OS=Homo sapiens GN=PLP1 PE=1 SV=2 - [MYPR_HUMAN]                                                              |
| P41218 | Myeloid cell nuclear differentiation antigen OS=Homo sapiens GN=MNDA PE=1 SV=1 - [MNDA_HUMAN]                                            |
| P12829 | Myosin light chain 4 OS=Homo sapiens GN=MYL4 PE=1 SV=3 - [MYL4_HUMAN]                                                                    |
| P60660 | Myosin light polypeptide 6 OS=Homo sapiens GN=MYL6 PE=1 SV=2 - [MYL6_HUMAN]                                                              |
| Q96A32 | Myosin regulatory light chain 2, skeletal muscle isoform OS=Homo sapiens GN=MYLPF PE=2 SV=1 - [MLRS_HUMAN]                               |
| P35580 | Myosin-10 OS=Homo sapiens GN=MYH10 PE=1 SV=3 - [MYH10_HUMAN]                                                                             |
| P35579 | Myosin-9 OS=Homo sapiens GN=MYH9 PE=1 SV=4 - [MYH9_HUMAN]                                                                                |
| B0I1T2 | Myosin-Ig OS=Homo sapiens GN=MYO1G PE=1 SV=2 - [MYO1G_HUMAN]                                                                             |
| Q3MIV8 | Myosin, heavy chain 11, smooth muscle OS=Homo sapiens GN=MYH11 PE=2 SV=1 - [Q3MIV8_HUMAN]                                                |
| Q9BUF9 | Myosin, light chain 9, regulatory OS=Homo sapiens GN=MYL9 PE=2 SV=1 - [Q9BUF9_HUMAN]                                                     |
| P58546 | Myotrophin OS=Homo sapiens GN=MTPN PE=1 SV=2 - [MTPN_HUMAN]                                                                              |
| Q76KP1 | N-acetyl-beta-glucosaminyl-glycoprotein 4-beta-N-acetylgalactosaminyltransferase 1 OS=Homo sapiens GN=B4GALNT4 PE=1 SV=1 - [B4GN4_HUMAN] |
| Q9BXD5 | N-acetylneuraminase lyase OS=Homo sapiens GN=NPL PE=2 SV=1 - [NPL_HUMAN]                                                                 |
| Q8TBE9 | N-acetylneuraminase-9-phosphatase OS=Homo sapiens GN=NANP PE=1 SV=1 - [NANP_HUMAN]                                                       |
| Q8TBK2 | N-lysine methyltransferase SETD6 OS=Homo sapiens GN=SETD6 PE=1 SV=2 - [SETD6_HUMAN]                                                      |
| Q9NXH9 | N(2),N(2)-dimethylguanosine tRNA methyltransferase OS=Homo sapiens GN=TRMT1 PE=1 SV=1 - [TRM1_HUMAN]                                     |
| O94760 | N(G),N(G)-dimethylarginine dimethylaminohydrolase 1 OS=Homo sapiens GN=DDAH1 PE=1 SV=3 - [DDAH1_HUMAN]                                   |
| A2A2U4 | NAD(P)H dehydrogenase, quinone 2 (Fragment) OS=Homo sapiens GN=NQO2 PE=4 SV=1 - [A2A2U4_HUMAN]                                           |
| Q16795 | NADH dehydrogenase [ubiquinone] 1 alpha subcomplex subunit 9, mitochondrial OS=Homo sapiens GN=NDUFA9 PE=1 SV=2 - [NDUA9_HUMAN]          |
| Q13765 | Nascent polypeptide-associated complex subunit alpha OS=Homo sapiens GN=NACA PE=1 SV=1 - [NACA_HUMAN]                                    |
| Q9H0M0 | NEDD4-like E3 ubiquitin-protein ligase WWP1 OS=Homo sapiens GN=WWP1 PE=1 SV=1 - [WWP1_HUMAN]                                             |
| Q15843 | NEDD8 OS=Homo sapiens GN=NEDD8 PE=1 SV=1 - [NEDD8_HUMAN]                                                                                 |
| Q8TBC4 | NEDD8-activating enzyme E1 catalytic subunit OS=Homo sapiens GN=UBA3 PE=1 SV=2 - [UBA3_HUMAN]                                            |
| P61081 | NEDD8-conjugating enzyme Ubc12 OS=Homo sapiens GN=UBE2M PE=1 SV=1 - [UBC12_HUMAN]                                                        |
| Q8WXH0 | Nesprin-2 OS=Homo sapiens GN=SYNE2 PE=1 SV=3 - [SYNE2_HUMAN]                                                                             |
| Q6ZN44 | Netrin receptor UNC5A OS=Homo sapiens GN=UNC5A PE=2 SV=3 - [UNC5A_HUMAN]                                                                 |
| Q8NEY1 | Neuron navigator 1 OS=Homo sapiens GN=NAV1 PE=1 SV=2 - [NAV1_HUMAN]                                                                      |
| Q8IVL1 | Neuron navigator 2 OS=Homo sapiens GN=NAV2 PE=1 SV=3 - [NAV2_HUMAN]                                                                      |
| Q9P2E3 | NFX1-type zinc finger-containing protein 1 OS=Homo sapiens GN=ZNF1 PE=1 SV=2 - [ZNF1_HUMAN]                                              |
| Q8NBF2 | NHL repeat-containing protein 2 OS=Homo sapiens GN=NHLRC2 PE=1 SV=1 - [NHLRC2_HUMAN]                                                     |
| O60934 | Nibrin OS=Homo sapiens GN=NBN PE=1 SV=1 - [NBN_HUMAN]                                                                                    |
| C9J8U2 | Nicotinate phosphoribosyltransferase domain containing 1, isoform CRA_e OS=Homo sapiens GN=NAPRT1 PE=4 SV=1 - [C9J8U2_HUMAN]             |
| Q9GZT8 | NIF3-like protein 1 OS=Homo sapiens GN=NIF3L1 PE=1 SV=2 - [NIF3L_HUMAN]                                                                  |
| Q6KC79 | Nipped-B-like protein OS=Homo sapiens GN=NIPBL PE=1 SV=2 - [NIPBL_HUMAN]                                                                 |
| B1AQP4 | Nitrilase 1 OS=Homo sapiens GN=NIT1 PE=4 SV=1 - [B1AQP4_HUMAN]                                                                           |

|        |                                                                                                                                   |
|--------|-----------------------------------------------------------------------------------------------------------------------------------|
| Q9NPP4 | NLR family CARD domain-containing protein 4 OS=Homo sapiens GN=NLRC4 PE=1 SV=2 - [NLRC4_HUMAN]                                    |
| Q5SYT8 | Novel protein similar to Pre-B cell enhancing factor (PBEF) (Fragment) OS=Homo sapiens GN=RP11-92J19.4 PE=1 SV=1 - [Q5SYT8_HUMAN] |
| Q9UNZ2 | NSFL1 cofactor p47 OS=Homo sapiens GN=NSFL1C PE=1 SV=2 - [NSF1C_HUMAN]                                                            |
| Q09161 | Nuclear cap-binding protein subunit 1 OS=Homo sapiens GN=NCBP1 PE=1 SV=1 - [NCBP1_HUMAN]                                          |
| B5B2M6 | Nuclear factor of activated T-cells c1 isoform IA-deltaIX OS=Homo sapiens GN=NFATC1 PE=2 SV=1 - [B5B2M6_HUMAN]                    |
| Q9Y266 | Nuclear migration protein nudC OS=Homo sapiens GN=NUDC PE=1 SV=1 - [NUDC_HUMAN]                                                   |
| Q8TEM1 | Nuclear pore membrane glycoprotein 210 OS=Homo sapiens GN=NUP210 PE=1 SV=3 - [PO210_HUMAN]                                        |
| P61970 | Nuclear transport factor 2 OS=Homo sapiens GN=NUTF2 PE=1 SV=1 - [NUTF2_HUMAN]                                                     |
| Q9H1E3 | Nuclear ubiquitous casein and cyclin-dependent kinases substrate OS=Homo sapiens GN=NUCKS1 PE=1 SV=1 - [NUCKS_HUMAN]              |
| P67809 | Nuclease-sensitive element-binding protein 1 OS=Homo sapiens GN=YBX1 PE=1 SV=3 - [YBOX1_HUMAN]                                    |
| Q02818 | Nucleobindin-1 OS=Homo sapiens GN=NUCB1 PE=1 SV=4 - [NUCB1_HUMAN]                                                                 |
| Q13823 | Nucleolar GTP-binding protein 2 OS=Homo sapiens GN=GNL2 PE=1 SV=1 - [NOG2_HUMAN]                                                  |
| P19338 | Nucleolin OS=Homo sapiens GN=NCL PE=1 SV=3 - [NUCL_HUMAN]                                                                         |
| P06748 | Nucleophosmin OS=Homo sapiens GN=NPM1 PE=1 SV=2 - [NPM_HUMAN]                                                                     |
| Q32Q12 | Nucleoside diphosphate kinase OS=Homo sapiens GN=NME1-NME2 PE=2 SV=1 - [Q32Q12_HUMAN]                                             |
| Q96RS6 | NudC domain-containing protein 1 OS=Homo sapiens GN=NUDCD1 PE=1 SV=2 - [NUDC1_HUMAN]                                              |
| Q8IVD9 | NudC domain-containing protein 3 OS=Homo sapiens GN=NUDCD3 PE=1 SV=3 - [NUDC3_HUMAN]                                              |
| Q7Z7N6 | NUDT1 protein OS=Homo sapiens GN=NUDT1 PE=2 SV=2 - [Q7Z7N6_HUMAN]                                                                 |
| Q9NTK5 | Obg-like ATPase 1 OS=Homo sapiens GN=OLA1 PE=1 SV=2 - [OLA1_HUMAN]                                                                |
| O95007 | Olfactory receptor 6B1 OS=Homo sapiens GN=OR6B1 PE=2 SV=1 - [OR6B1_HUMAN]                                                         |
| Q9NQR4 | Omega-amidase NIT2 OS=Homo sapiens GN=NIT2 PE=1 SV=1 - [NIT2_HUMAN]                                                               |
| Q8WWZ8 | Oncoprotein-induced transcript 3 protein OS=Homo sapiens GN=OIT3 PE=1 SV=2 - [OIT3_HUMAN]                                         |
| Q96CV9 | Optineurin OS=Homo sapiens GN=OPTN PE=1 SV=2 - [OPTN_HUMAN]                                                                       |
| B5LY72 | Orotidine 5'-phosphate decarboxylase OS=Homo sapiens GN=UMPS PE=2 SV=1 - [B5LY72_HUMAN]                                           |
| Q8TE49 | OTU domain-containing protein 7A OS=Homo sapiens GN=OTUD7A PE=1 SV=1 - [OTU7A_HUMAN]                                              |
| B7WNL4 | Oxysterol-binding protein OS=Homo sapiens GN=OSBP PE=3 SV=2 - [B7WNL4_HUMAN]                                                      |
| B4DTR3 | Oxysterol-binding protein OS=Homo sapiens GN=OSBP2 PE=2 SV=1 - [B4DTR3_HUMAN]                                                     |
| Q6FIA3 | PAC SIN2 protein OS=Homo sapiens GN=PAC SIN2 PE=2 SV=1 - [Q6FIA3_HUMAN]                                                           |
| Q5VU21 | PAI-1 mRNA-binding protein variant OS=Homo sapiens GN=SERBP1 PE=2 SV=1 - [Q5VU21_HUMAN]                                           |
| O75182 | Paired amphipathic helix protein Sin3b OS=Homo sapiens GN=SIN3B PE=1 SV=2 - [SIN3B_HUMAN]                                         |
| Q5T0S4 | Palmitoyl-protein thioesterase 1 (Fragment) OS=Homo sapiens GN=PPT1 PE=2 SV=1 - [Q5T0S4_HUMAN]                                    |
| Q96RD7 | Pannexin-1 OS=Homo sapiens GN=PANX1 PE=1 SV=4 - [PANX1_HUMAN]                                                                     |
| Q9UL41 | Paraneoplastic antigen Ma3 OS=Homo sapiens GN=PNMA3 PE=2 SV=2 - [PNMA3_HUMAN]                                                     |
| P20962 | Parathyrosin OS=Homo sapiens GN=PTMS PE=1 SV=2 - [PTMS_HUMAN]                                                                     |
| Q9UBV8 | Peflin OS=Homo sapiens GN=PEF1 PE=1 SV=1 - [PEF1_HUMAN]                                                                           |
| P62937 | Peptidyl-prolyl cis-trans isomerase A OS=Homo sapiens GN=PPIA PE=1 SV=2 - [PPIA_HUMAN]                                            |
| Q00688 | Peptidyl-prolyl cis-trans isomerase FKBP3 OS=Homo sapiens GN=FKBP3 PE=1 SV=1 - [FKBP3_HUMAN]                                      |
| Q02790 | Peptidyl-prolyl cis-trans isomerase FKBP4 OS=Homo sapiens GN=FKBP4 PE=1 SV=3 - [FKBP4_HUMAN]                                      |
| Q13526 | Peptidyl-prolyl cis-trans isomerase NIMA-interacting 1 OS=Homo sapiens GN=PIN1 PE=1 SV=1 - [PIN1_HUMAN]                           |
| Q9Y3C6 | Peptidyl-prolyl cis-trans isomerase-like 1 OS=Homo sapiens GN=PPIL1 PE=1 SV=1 - [PPIL1_HUMAN]                                     |
| Q567Q0 | Peptidylprolyl isomerase A (Cyclophilin A) OS=Homo sapiens GN=PPIA PE=2 SV=1 - [Q567Q0_HUMAN]                                     |
| O60664 | Perilipin-3 OS=Homo sapiens GN=PLIN3 PE=1 SV=3 - [PLIN3_HUMAN]                                                                    |
| Q06830 | Peroxiredoxin-1 OS=Homo sapiens GN=PRDX1 PE=1 SV=1 - [PRDX1_HUMAN]                                                                |

|               |                                                                                                                                    |
|---------------|------------------------------------------------------------------------------------------------------------------------------------|
| P32119        | Peroxiredoxin-2 OS=Homo sapiens GN=PRDX2 PE=1 SV=5 - [PRDX2_HUMAN]                                                                 |
| P30044        | Peroxiredoxin-5, mitochondrial OS=Homo sapiens GN=PRDX5 PE=1 SV=4 - [PRDX5_HUMAN]                                                  |
| <i>P30041</i> | <i>Peroxiredoxin-6 OS=Homo sapiens GN=PRDX6 PE=1 SV=3 - [PRDX6_HUMAN]</i>                                                          |
| Q8WW12        | PEST proteolytic signal-containing nuclear protein OS=Homo sapiens GN=PCNP PE=1 SV=2 - [PCNP_HUMAN]                                |
| Q9NSD9        | Phenylalanyl-tRNA synthetase beta chain OS=Homo sapiens GN=FARSB PE=1 SV=3 - [SYFB_HUMAN]                                          |
| Q92539        | Phosphatidate phosphatase LPIN2 OS=Homo sapiens GN=LPIN2 PE=1 SV=1 - [LPIN2_HUMAN]                                                 |
| Q9UKL6        | Phosphatidylcholine transfer protein OS=Homo sapiens GN=PCTP PE=1 SV=1 - [PPCT_HUMAN]                                              |
| P30086        | Phosphatidylethanolamine-binding protein 1 OS=Homo sapiens GN=PEBP1 PE=1 SV=3 - [PEBP1_HUMAN]                                      |
| B3KYB7        | Phosphatidylinositol transfer protein, beta (Fragment) OS=Homo sapiens GN=PITPNB PE=4 SV=1 - [B3KYB7_HUMAN]                        |
| Q92835        | Phosphatidylinositol-3,4,5-trisphosphate 5-phosphatase 1 OS=Homo sapiens GN=INPP5D PE=1 SV=2 - [SHIP1_HUMAN]                       |
| Q5T9C9        | Phosphatidylinositol-4-phosphate 5-kinase-like protein 1 OS=Homo sapiens GN=PIP5KL1 PE=2 SV=2 - [PI5L1_HUMAN]                      |
| P42336        | Phosphatidylinositol-4,5-bisphosphate 3-kinase catalytic subunit alpha isoform OS=Homo sapiens GN=PIK3CA PE=1 SV=2 - [PK3CA_HUMAN] |
| P48426        | Phosphatidylinositol-5-phosphate 4-kinase type-2 alpha OS=Homo sapiens GN=PIP4K2A PE=1 SV=2 - [PI42A_HUMAN]                        |
| Q96G03        | Phosphoglucomutase-2 OS=Homo sapiens GN=PGM2 PE=1 SV=4 - [PGM2_HUMAN]                                                              |
| Q5SZU1        | Phosphoglycerate dehydrogenase OS=Homo sapiens GN=PHGDH PE=2 SV=1 - [Q5SZU1_HUMAN]                                                 |
| P00558        | Phosphoglycerate kinase 1 OS=Homo sapiens GN=PGK1 PE=1 SV=3 - [PGK1_HUMAN]                                                         |
| P07205        | Phosphoglycerate kinase 2 OS=Homo sapiens GN=PGK2 PE=1 SV=3 - [PGK2_HUMAN]                                                         |
| P18669        | Phosphoglycerate mutase 1 OS=Homo sapiens GN=PGAM1 PE=1 SV=2 - [PGAM1_HUMAN]                                                       |
| A6NDG6        | Phosphoglycolate phosphatase OS=Homo sapiens GN=PGP PE=1 SV=1 - [PGP_HUMAN]                                                        |
| Q5T1Z0        | Phospholysine phosphohistidine inorganic pyrophosphate phosphatase OS=Homo sapiens GN=LHPP PE=2 SV=1 - [Q5T1Z0_HUMAN]              |
| Q9HAB8        | Phosphopantothenate--cysteine ligase OS=Homo sapiens GN=PPCS PE=1 SV=2 - [PPCS_HUMAN]                                              |
| O15067        | Phosphoribosylformylglycinamide synthase OS=Homo sapiens GN=PFAS PE=1 SV=4 - [PUR4_HUMAN]                                          |
| P46019        | Phosphorylase b kinase regulatory subunit alpha, liver isoform OS=Homo sapiens GN=PHKA2 PE=1 SV=1 - [KPB2_HUMAN]                   |
| Q9Y617        | Phosphoserine aminotransferase OS=Homo sapiens GN=PSAT1 PE=1 SV=2 - [SERC_HUMAN]                                                   |
| O00625        | Pirin OS=Homo sapiens GN=PIR PE=1 SV=1 - [PIR_HUMAN]                                                                               |
| Q9GZP4        | PITH domain-containing protein 1 OS=Homo sapiens GN=PITHD1 PE=1 SV=1 - [PITH1_HUMAN]                                               |
| P13796        | Plastin-2 OS=Homo sapiens GN=LCP1 PE=1 SV=6 - [PLSL_HUMAN]                                                                         |
| P43034        | Platelet-activating factor acetylhydrolase IB subunit alpha OS=Homo sapiens GN=PFAH1B1 PE=1 SV=2 - [LIS1_HUMAN]                    |
| P68402        | Platelet-activating factor acetylhydrolase IB subunit beta OS=Homo sapiens GN=PFAH1B2 PE=1 SV=1 - [PA1B2_HUMAN]                    |
| Q15102        | Platelet-activating factor acetylhydrolase IB subunit gamma OS=Homo sapiens GN=PFAH1B3 PE=1 SV=1 - [PA1B3_HUMAN]                   |
| Q8IVE3        | Pleckstrin homology domain-containing family H member 2 OS=Homo sapiens GN=PLEKHH2 PE=2 SV=2 - [PKHH2_HUMAN]                       |
| A0JP02        | PLEKHA5 protein OS=Homo sapiens GN=PLEKHA5 PE=2 SV=1 - [A0JP02_HUMAN]                                                              |
| Q68Y55        | Poly(RC) binding protein 2 OS=Homo sapiens GN=PCBP2 PE=2 SV=1 - [Q68Y55_HUMAN]                                                     |
| Q15365        | Poly(rC)-binding protein 1 OS=Homo sapiens GN=PCBP1 PE=1 SV=2 - [PCBP1_HUMAN]                                                      |
| P26599        | Polypyrimidine tract-binding protein 1 OS=Homo sapiens GN=PTBP1 PE=1 SV=1 - [PTBP1_HUMAN]                                          |
| Q14721        | Potassium voltage-gated channel subfamily B member 1 OS=Homo sapiens GN=KCNB1 PE=1 SV=2 - [KCNB1_HUMAN]                            |
| Q14CL3        | Potassium voltage-gated channel, subfamily H (Eag-related), member 1 OS=Homo sapiens GN=KCNH1 PE=2 SV=1 - [Q14CL3_HUMAN]           |
| Q6S8J7        | POTE ankyrin domain family member A OS=Homo sapiens GN=POTEA PE=2 SV=1 - [POTEA_HUMAN]                                             |
| P57071        | PR domain zinc finger protein 15 OS=Homo sapiens GN=PRDM15 PE=2 SV=4 - [PRD15_HUMAN]                                               |
| O60925        | Prefoldin subunit 1 OS=Homo sapiens GN=PFDN1 PE=1 SV=2 - [PFD1_HUMAN]                                                              |
| Q9UHV9        | Prefoldin subunit 2 OS=Homo sapiens GN=PFDN2 PE=1 SV=1 - [PFD2_HUMAN]                                                              |
| Q9NQP4        | Prefoldin subunit 4 OS=Homo sapiens GN=PFDN4 PE=1 SV=1 - [PFD4_HUMAN]                                                              |
| Q99471        | Prefoldin subunit 5 OS=Homo sapiens GN=PFDN5 PE=1 SV=2 - [PFD5_HUMAN]                                                              |

|        |                                                                                                                           |
|--------|---------------------------------------------------------------------------------------------------------------------------|
| O15212 | Prefoldin subunit 6 OS=Homo sapiens GN=PFDN6 PE=1 SV=1 - [PFD6_HUMAN]                                                     |
| Q86TM3 | Probable ATP-dependent RNA helicase DDX53 OS=Homo sapiens GN=DDX53 PE=1 SV=3 - [DDX53_HUMAN]                              |
| Q9HD20 | Probable cation-transporting ATPase 13A1 OS=Homo sapiens GN=ATP13A1 PE=1 SV=2 - [AT131_HUMAN]                             |
| Q96GX9 | Probable methylthioribulose-1-phosphate dehydratase OS=Homo sapiens GN=APIP PE=1 SV=1 - [MTNB_HUMAN]                      |
| Q93008 | Probable ubiquitin carboxyl-terminal hydrolase FAF-X OS=Homo sapiens GN=USP9X PE=1 SV=3 - [USP9X_HUMAN]                   |
| O00507 | Probable ubiquitin carboxyl-terminal hydrolase FAF-Y OS=Homo sapiens GN=USP9Y PE=1 SV=2 - [USP9Y_HUMAN]                   |
| P07737 | Profilin-1 OS=Homo sapiens GN=PFN1 PE=1 SV=2 - [PROF1_HUMAN]                                                              |
| Q8WUM4 | Programmed cell death 6-interacting protein OS=Homo sapiens GN=PDCD6IP PE=1 SV=1 - [PDC6I_HUMAN]                          |
| O14737 | Programmed cell death protein 5 OS=Homo sapiens GN=PDCD5 PE=1 SV=3 - [PDCD5_HUMAN]                                        |
| Q9HCU5 | Prolactin regulatory element-binding protein OS=Homo sapiens GN=PREB PE=1 SV=2 - [PREB_HUMAN]                             |
| Q9UQ80 | Proliferation-associated protein 2G4 OS=Homo sapiens GN=PA2G4 PE=1 SV=3 - [PA2G4_HUMAN]                                   |
| Q96HE9 | Proline-rich protein 11 OS=Homo sapiens GN=PRR11 PE=1 SV=1 - [PRR11_HUMAN]                                                |
| Q8IVL6 | Prolyl 3-hydroxylase 3 OS=Homo sapiens GN=LEPREL2 PE=2 SV=1 - [P3H3_HUMAN]                                                |
| P48147 | Prolyl endopeptidase OS=Homo sapiens GN=PREP PE=1 SV=2 - [PPCE_HUMAN]                                                     |
| B4DP21 | Prostaglandin E synthase 3 (Cytosolic), isoform CRA_d OS=Homo sapiens GN=PTGES3 PE=2 SV=1 - [B4DP21_HUMAN]                |
| A6XGL3 | Protease serine 1 OS=Homo sapiens PE=2 SV=1 - [A6XGL3_HUMAN]                                                              |
| B1AN99 | Protease, serine, 3 (Fragment) OS=Homo sapiens GN=PRSS3 PE=3 SV=1 - [B1AN99_HUMAN]                                        |
| A8K3Z3 | Proteasome (Prosome, macropain) 26S subunit, ATPase, 5, isoform CRA_b OS=Homo sapiens GN=PSMC5 PE=2 SV=1 - [A8K3Z3_HUMAN] |
| B1AJY5 | Proteasome (Prosome, macropain) 26S subunit, non-ATPase, 10 OS=Homo sapiens GN=PSMD10 PE=4 SV=1 - [B1AJY5_HUMAN]          |
| Q4VXG9 | Proteasome (Prosome, macropain) 26S subunit, non-ATPase, 5 OS=Homo sapiens GN=PSMD5 PE=2 SV=1 - [Q4VXG9_HUMAN]            |
| Q5QPM7 | Proteasome (Prosome, macropain) inhibitor subunit 1 (PI31) OS=Homo sapiens GN=PSMF1 PE=2 SV=2 - [Q5QPM7_HUMAN]            |
| Q06323 | Proteasome activator complex subunit 1 OS=Homo sapiens GN=PSME1 PE=1 SV=1 - [PSME1_HUMAN]                                 |
| Q9UL46 | Proteasome activator complex subunit 2 OS=Homo sapiens GN=PSME2 PE=1 SV=4 - [PSME2_HUMAN]                                 |
| O95456 | Proteasome assembly chaperone 1 OS=Homo sapiens GN=PSMG1 PE=1 SV=1 - [PSMG1_HUMAN]                                        |
| P25787 | Proteasome subunit alpha type-2 OS=Homo sapiens GN=PSMA2 PE=1 SV=2 - [PSA2_HUMAN]                                         |
| P25788 | Proteasome subunit alpha type-3 OS=Homo sapiens GN=PSMA3 PE=1 SV=2 - [PSA3_HUMAN]                                         |
| P28066 | Proteasome subunit alpha type-5 OS=Homo sapiens GN=PSMA5 PE=1 SV=3 - [PSA5_HUMAN]                                         |
| P60900 | Proteasome subunit alpha type-6 OS=Homo sapiens GN=PSMA6 PE=1 SV=1 - [PSA6_HUMAN]                                         |
| O14818 | Proteasome subunit alpha type-7 OS=Homo sapiens GN=PSMA7 PE=1 SV=1 - [PSA7_HUMAN]                                         |
| P20618 | Proteasome subunit beta type-1 OS=Homo sapiens GN=PSMB1 PE=1 SV=2 - [PSB1_HUMAN]                                          |
| P49721 | Proteasome subunit beta type-2 OS=Homo sapiens GN=PSMB2 PE=1 SV=1 - [PSB2_HUMAN]                                          |
| P49720 | Proteasome subunit beta type-3 OS=Homo sapiens GN=PSMB3 PE=1 SV=2 - [PSB3_HUMAN]                                          |
| P28070 | Proteasome subunit beta type-4 OS=Homo sapiens GN=PSMB4 PE=1 SV=4 - [PSB4_HUMAN]                                          |
| P28074 | Proteasome subunit beta type-5 OS=Homo sapiens GN=PSMB5 PE=1 SV=3 - [PSB5_HUMAN]                                          |
| P28072 | Proteasome subunit beta type-6 OS=Homo sapiens GN=PSMB6 PE=1 SV=4 - [PSB6_HUMAN]                                          |
| Q99436 | Proteasome subunit beta type-7 OS=Homo sapiens GN=PSMB7 PE=1 SV=1 - [PSB7_HUMAN]                                          |
| Q5VYK3 | Proteasome-associated protein ECM29 homolog OS=Homo sapiens GN=ECM29 PE=1 SV=2 - [ECM29_HUMAN]                            |
| Q8IVF2 | Protein AHNAK2 OS=Homo sapiens GN=AHNAK2 PE=1 SV=2 - [AHNK2_HUMAN]                                                        |
| A8MTP3 | Protein arginine methyltransferase 5, isoform CRA_c OS=Homo sapiens GN=PRMT5 PE=4 SV=1 - [A8MTP3_HUMAN]                   |
| Q9UKV8 | Protein argonaute-2 OS=Homo sapiens GN=EIF2C2 PE=1 SV=3 - [AGO2_HUMAN]                                                    |
| Q8TCG1 | Protein CIP2A OS=Homo sapiens GN=KIAA1524 PE=1 SV=2 - [CIP2A_HUMAN]                                                       |
| Q5TDH0 | Protein DDI1 homolog 2 OS=Homo sapiens GN=DDI2 PE=1 SV=1 - [DDI2_HUMAN]                                                   |
| Q8N919 | Protein deltex-3 OS=Homo sapiens GN=DTX3 PE=2 SV=2 - [DTX3_HUMAN]                                                         |

|               |                                                                                                                                |
|---------------|--------------------------------------------------------------------------------------------------------------------------------|
| Q99497        | Protein DJ-1 OS=Homo sapiens GN=PARK7 PE=1 SV=2 - [PARK7_HUMAN]                                                                |
| Q96BN8        | Protein FAM105B OS=Homo sapiens GN=FAM105B PE=1 SV=3 - [F105B_HUMAN]                                                           |
| Q9NRY5        | Protein FAM114A2 OS=Homo sapiens GN=FAM114A2 PE=1 SV=4 - [F1142_HUMAN]                                                         |
| Q96KS9        | Protein FAM167A OS=Homo sapiens GN=FAM167A PE=2 SV=1 - [F167A_HUMAN]                                                           |
| P58499        | Protein FAM3B OS=Homo sapiens GN=FAM3B PE=1 SV=2 - [FAM3B_HUMAN]                                                               |
| Q5VWP2        | Protein FAM46C OS=Homo sapiens GN=FAM46C PE=2 SV=1 - [FA46C_HUMAN]                                                             |
| Q9NUQ9        | Protein FAM49B OS=Homo sapiens GN=FAM49B PE=1 SV=1 - [FA49B_HUMAN]                                                             |
| Q6UWF7        | Protein FAM55D OS=Homo sapiens GN=FAM55D PE=2 SV=1 - [FA55D_HUMAN]                                                             |
| Q8IWB4        | Protein FAM75A7 OS=Homo sapiens GN=FAM75A7 PE=2 SV=4 - [F75A7_HUMAN]                                                           |
| Q9C0D2        | Protein KIAA1731 OS=Homo sapiens GN=KIAA1731 PE=2 SV=4 - [K1731_HUMAN]                                                         |
| P05771        | Protein kinase C beta type OS=Homo sapiens GN=PRKCB PE=1 SV=4 - [KPCB_HUMAN]                                                   |
| Q96GA3        | Protein LTV1 homolog OS=Homo sapiens GN=LTV1 PE=1 SV=1 - [LTV1_HUMAN]                                                          |
| Q8WZA0        | Protein LZIC OS=Homo sapiens GN=LZIC PE=1 SV=1 - [LZIC_HUMAN]                                                                  |
| Q9P2P1        | Protein NYNRIN OS=Homo sapiens GN=NYNRIN PE=1 SV=3 - [NYNRI_HUMAN]                                                             |
| Q15435        | Protein phosphatase 1 regulatory subunit 7 OS=Homo sapiens GN=PPP1R7 PE=1 SV=1 - [PP1R7_HUMAN]                                 |
| P35813        | Protein phosphatase 1A OS=Homo sapiens GN=PPM1A PE=1 SV=1 - [PPM1A_HUMAN]                                                      |
| O75688        | Protein phosphatase 1B OS=Homo sapiens GN=PPM1B PE=1 SV=1 - [PPM1B_HUMAN]                                                      |
| A6PVN5        | Protein phosphatase 2A activator, regulatory subunit 4 OS=Homo sapiens GN=PPP2R4 PE=4 SV=1 - [A6PVN5_HUMAN]                    |
| Q9Y570        | Protein phosphatase methylesterase 1 OS=Homo sapiens GN=PPME1 PE=1 SV=3 - [PPME1_HUMAN]                                        |
| Q96M27        | Protein PRRC1 OS=Homo sapiens GN=PRRC1 PE=1 SV=1 - [PRRC1_HUMAN]                                                               |
| Q9P258        | Protein RCC2 OS=Homo sapiens GN=RCC2 PE=1 SV=2 - [RCC2_HUMAN]                                                                  |
| P31949        | Protein S100-A11 OS=Homo sapiens GN=S100A11 PE=1 SV=2 - [S10AB_HUMAN]                                                          |
| P26447        | Protein S100-A4 OS=Homo sapiens GN=S100A4 PE=1 SV=1 - [S10A4_HUMAN]                                                            |
| <i>P06703</i> | <i>Protein S100-A6 OS=Homo sapiens GN=S100A6 PE=1 SV=1 - [S10A6_HUMAN]</i>                                                     |
| Q13796        | Protein Shroom2 OS=Homo sapiens GN=SHROOM2 PE=1 SV=1 - [SHRM2_HUMAN]                                                           |
| Q9UBV4        | Protein Wnt-16 OS=Homo sapiens GN=WNT16 PE=2 SV=1 - [WNT16_HUMAN]                                                              |
| Q9H900        | Protein zwilch homolog OS=Homo sapiens GN=ZWILCH PE=1 SV=2 - [ZWILC_HUMAN]                                                     |
| B7Z972        | Protein-L-isoaspartate O-methyltransferase OS=Homo sapiens GN=PCMT1 PE=2 SV=1 - [B7Z972_HUMAN]                                 |
| Q9Y5H8        | Protocadherin alpha-3 OS=Homo sapiens GN=PCDHA3 PE=1 SV=1 - [PCDA3_HUMAN]                                                      |
| Q9UN71        | Protocadherin gamma-B4 OS=Homo sapiens GN=PCDHGB4 PE=2 SV=1 - [PCDGG_HUMAN]                                                    |
| Q567Q5        | PSMA4 protein OS=Homo sapiens GN=PSMA4 PE=2 SV=1 - [Q567Q5_HUMAN]                                                              |
| P00491        | Purine nucleoside phosphorylase OS=Homo sapiens GN=PNP PE=1 SV=2 - [PNPH_HUMAN]                                                |
| A6NGE7        | Putative 2-oxo-4-hydroxy-4-carboxy-5-ureidoimidazole decarboxylase OS=Homo sapiens GN=PRHOXNB PE=5 SV=2 - [URAD_HUMAN]         |
| P20848        | Putative alpha-1-antitrypsin-related protein OS=Homo sapiens GN=SERPINA2 PE=5 SV=1 - [A1ATR_HUMAN]                             |
| A8MPP1        | Putative ATP-dependent RNA helicase DDX11-like protein 8 OS=Homo sapiens GN=DDX11L8 PE=1 SV=1 - [D11L8_HUMAN]                  |
| A6NDK9        | Putative golgin subfamily A member 6C OS=Homo sapiens GN=GOLGA6C PE=5 SV=1 - [GOG6C_HUMAN]                                     |
| P48741        | Putative heat shock 70 kDa protein 7 OS=Homo sapiens GN=HSPA7 PE=5 SV=2 - [HSP77_HUMAN]                                        |
| Q6GMV3        | Putative peptidyl-tRNA hydrolase PTRHD1 OS=Homo sapiens GN=PTRHD1 PE=1 SV=1 - [PTRD1_HUMAN]                                    |
| Q9C0F0        | Putative Polycomb group protein ASXL3 OS=Homo sapiens GN=ASXL3 PE=2 SV=3 - [ASXL3_HUMAN]                                       |
| A4D2B8        | Putative postmeiotic segregation increased 2-like protein 1 OS=Homo sapiens GN=PMS2P1 PE=5 SV=1 - [PM2P1_HUMAN]                |
| P98179        | Putative RNA-binding protein 3 OS=Homo sapiens GN=RBM3 PE=1 SV=1 - [RBM3_HUMAN]                                                |
| Q9P1A2        | Putative serine/threonine-protein phosphatase 4 regulatory subunit 1-like OS=Homo sapiens GN=PPP4R1L PE=5 SV=2 - [PP4RL_HUMAN] |
| Q495Y7        | Putative speedy protein E7 OS=Homo sapiens GN=SPDYE7P PE=5 SV=1 - [SPDE7_HUMAN]                                                |



|        |                                                                                                              |
|--------|--------------------------------------------------------------------------------------------------------------|
| Q5QP74 | Putative uncharacterized protein C10orf115 OS=Homo sapiens GN=C10orf115 PE=2 SV=2 - [CJ115_HUMAN]            |
| Q8WZ69 | Putative uncharacterized protein C11orf40 OS=Homo sapiens GN=C11orf40 PE=2 SV=1 - [CK040_HUMAN]              |
| Q96BT1 | Putative uncharacterized protein C3orf49 OS=Homo sapiens GN=C3orf49 PE=2 SV=1 - [CC049_HUMAN]                |
| Q53XA7 | Putative uncharacterized protein DKFZp686F13224 OS=Homo sapiens GN=DKFZp686F13224 PE=2 SV=1 - [Q53XA7_HUMAN] |
| A8MT66 | Putative uncharacterized protein ENSP00000383407 OS=Homo sapiens PE=5 SV=1 - [YU005_HUMAN]                   |
| Q6ICG7 | Putative uncharacterized protein LOC100131404 OS=Homo sapiens PE=2 SV=1 - [YV028_HUMAN]                      |
| Q6ZTK2 | Putative uncharacterized protein LOC400499 OS=Homo sapiens PE=2 SV=1 - [YP015_HUMAN]                         |
| Q9NSJ1 | Putative zinc finger protein 355P OS=Homo sapiens GN=ZNF355P PE=5 SV=2 - [Z355P_HUMAN]                       |
| Q96GD0 | Pyridoxal phosphate phosphatase OS=Homo sapiens GN=PDXP PE=1 SV=2 - [PLPP_HUMAN]                             |
| P14618 | Pyruvate kinase isozymes M1/M2 OS=Homo sapiens GN=PKM2 PE=1 SV=4 - [KPYM_HUMAN]                              |
| P30613 | Pyruvate kinase isozymes R/L OS=Homo sapiens GN=PKLR PE=1 SV=2 - [KPYR_HUMAN]                                |
| Q53FA7 | Quinone oxidoreductase PIG3 OS=Homo sapiens GN=TP53I3 PE=1 SV=2 - [QORX_HUMAN]                               |
| P50395 | Rab GDP dissociation inhibitor beta OS=Homo sapiens GN=GDI2 PE=1 SV=2 - [GDIB_HUMAN]                         |
| Q96NA2 | Rab-interacting lysosomal protein OS=Homo sapiens GN=RILP PE=1 SV=1 - [RILP_HUMAN]                           |
| Q5HYI8 | Rab-like protein 3 OS=Homo sapiens GN=RABL3 PE=1 SV=1 - [RABL3_HUMAN]                                        |
| Q8WVF3 | RAB28 protein OS=Homo sapiens GN=RAB28 PE=2 SV=1 - [Q8WVF3_HUMAN]                                            |
| B4DKD7 | RAB5B, member RAS oncogene family, isoform CRA_b OS=Homo sapiens GN=RAB5B PE=2 SV=1 - [B4DKD7_HUMAN]         |
| P35241 | Radixin OS=Homo sapiens GN=RDY PE=1 SV=1 - [RADI_HUMAN]                                                      |
| P46060 | Ran GTPase-activating protein 1 OS=Homo sapiens GN=RANGAP1 PE=1 SV=1 - [RAGP1_HUMAN]                         |
| O60518 | Ran-binding protein 6 OS=Homo sapiens GN=RANBP6 PE=1 SV=2 - [RNBP6_HUMAN]                                    |
| P43487 | Ran-specific GTPase-activating protein OS=Homo sapiens GN=RANBP1 PE=1 SV=1 - [RANG_HUMAN]                    |
| Q5T3S7 | RAP1 GTPase activating protein OS=Homo sapiens GN=RAP1GAP PE=2 SV=1 - [Q5T3S7_HUMAN]                         |
| P63000 | Ras-related C3 botulinum toxin substrate 1 OS=Homo sapiens GN=RAC1 PE=1 SV=1 - [RAC1_HUMAN]                  |
| P61026 | Ras-related protein Rab-10 OS=Homo sapiens GN=RAB10 PE=1 SV=1 - [RAB10_HUMAN]                                |
| P62491 | Ras-related protein Rab-11A OS=Homo sapiens GN=RAB11A PE=1 SV=3 - [RB11A_HUMAN]                              |
| P61106 | Ras-related protein Rab-14 OS=Homo sapiens GN=RAB14 PE=1 SV=4 - [RAB14_HUMAN]                                |
| P62820 | Ras-related protein Rab-1A OS=Homo sapiens GN=RAB1A PE=1 SV=3 - [RAB1A_HUMAN]                                |
| Q9H0U4 | Ras-related protein Rab-1B OS=Homo sapiens GN=RAB1B PE=1 SV=1 - [RAB1B_HUMAN]                                |
| P51148 | Ras-related protein Rab-5C OS=Homo sapiens GN=RAB5C PE=1 SV=2 - [RAB5C_HUMAN]                                |
| Q8TDY2 | RB1-inducible coiled-coil protein 1 OS=Homo sapiens GN=RB1CC1 PE=1 SV=3 - [RBCC1_HUMAN]                      |
| O43665 | Regulator of G-protein signaling 10 OS=Homo sapiens GN=RGS10 PE=1 SV=2 - [RGS10_HUMAN]                       |
| P00352 | <i>Retinal dehydrogenase 1 OS=Homo sapiens GN=ALDH1A1 PE=1 SV=2 - [AL1A1_HUMAN]</i>                          |
| Q9Y2V3 | Retinal homeobox protein Rx OS=Homo sapiens GN=RAX PE=1 SV=2 - [RX_HUMAN]                                    |
| P52565 | Rho GDP-dissociation inhibitor 1 OS=Homo sapiens GN=ARHGDI1 PE=1 SV=3 - [GDIR1_HUMAN]                        |
| A1A4S6 | Rho GTPase-activating protein 10 OS=Homo sapiens GN=ARHGAP10 PE=1 SV=1 - [RHG10_HUMAN]                       |
| Q52LW3 | Rho GTPase-activating protein 29 OS=Homo sapiens GN=ARHGAP29 PE=1 SV=2 - [RHG29_HUMAN]                       |
| Q7Z6I6 | Rho GTPase-activating protein 30 OS=Homo sapiens GN=ARHGAP30 PE=1 SV=3 - [RHG30_HUMAN]                       |
| O43182 | Rho GTPase-activating protein 6 OS=Homo sapiens GN=ARHGAP6 PE=1 SV=3 - [RHG06_HUMAN]                         |
| Q92974 | Rho guanine nucleotide exchange factor 2 OS=Homo sapiens GN=ARHGEF2 PE=1 SV=4 - [ARHG2_HUMAN]                |
| P13489 | Ribonuclease inhibitor OS=Homo sapiens GN=RNH1 PE=1 SV=2 - [RINI_HUMAN]                                      |
| Q5D1E8 | Ribonuclease ZC3H12A OS=Homo sapiens GN=ZC3H12A PE=1 SV=1 - [ZC12A_HUMAN]                                    |
| P49247 | Ribose-5-phosphate isomerase OS=Homo sapiens GN=RPIA PE=1 SV=3 - [RPIA_HUMAN]                                |
| P60891 | Ribose-phosphate pyrophosphokinase 1 OS=Homo sapiens GN=PRPS1 PE=1 SV=2 - [PRPS1_HUMAN]                      |

|        |                                                                                                                                       |
|--------|---------------------------------------------------------------------------------------------------------------------------------------|
| P11908 | Ribose-phosphate pyrophosphokinase 2 OS=Homo sapiens GN=PRPS2 PE=1 SV=2 - [PRPS2_HUMAN]                                               |
| Q5VVC8 | Ribosomal protein L11 (Fragment) OS=Homo sapiens GN=RPL11 PE=2 SV=1 - [Q5VVC8_HUMAN]                                                  |
| E7EQV9 | Ribosomal protein L15 OS=Homo sapiens GN=RPL15 PE=3 SV=1 - [E7EQV9_HUMAN]                                                             |
| C9JNW5 | Ribosomal protein L24, isoform CRA_e OS=Homo sapiens GN=RPL24 PE=4 SV=1 - [C9JNW5_HUMAN]                                              |
| D6R9X9 | Ribosomal protein L37 OS=Homo sapiens GN=RPL37 PE=3 SV=1 - [D6R9X9_HUMAN]                                                             |
| B3KTM6 | Ribosomal protein L5, isoform CRA_b OS=Homo sapiens GN=RPL5 PE=2 SV=1 - [B3KTM6_HUMAN]                                                |
| Q5T8U3 | Ribosomal protein L7a (Fragment) OS=Homo sapiens GN=RPL7A PE=4 SV=1 - [Q5T8U3_HUMAN]                                                  |
| C9J1C5 | Ribosomal protein S27-like, isoform CRA_a OS=Homo sapiens GN=RPS27L PE=3 SV=1 - [C9J1C5_HUMAN]                                        |
| D6R9B6 | Ribosomal protein S3A, isoform CRA_e OS=Homo sapiens GN=RPS3A PE=4 SV=1 - [D6R9B6_HUMAN]                                              |
| Q5SVM6 | Ribosomal protein S6 kinase, 90kDa, polypeptide 1 (Fragment) OS=Homo sapiens GN=RPS6KA1 PE=2 SV=1 - [Q5SVM6_HUMAN]                    |
| Q9Y3A4 | Ribosomal RNA-processing protein 7 homolog A OS=Homo sapiens GN=RRP7A PE=1 SV=2 - [RRP7A_HUMAN]                                       |
| Q9P2E9 | Ribosome-binding protein 1 OS=Homo sapiens GN=RRBP1 PE=1 SV=4 - [RRBP1_HUMAN]                                                         |
| Q5EBL4 | RILP-like protein 1 OS=Homo sapiens GN=RILPL1 PE=1 SV=1 - [RIPL1_HUMAN]                                                               |
| Q9NXI6 | RING finger protein 186 OS=Homo sapiens GN=RNF186 PE=2 SV=1 - [RN186_HUMAN]                                                           |
| Q63HN8 | RING finger protein 213 OS=Homo sapiens GN=RNF213 PE=1 SV=2 - [RN213_HUMAN]                                                           |
| Q5W0B1 | RING finger protein 219 OS=Homo sapiens GN=RNF219 PE=1 SV=1 - [RN219_HUMAN]                                                           |
| O00442 | RNA 3'-terminal phosphate cyclase OS=Homo sapiens GN=RTCD1 PE=1 SV=1 - [RTC1_HUMAN]                                                   |
| Q9Y5S9 | RNA-binding protein 8A OS=Homo sapiens GN=RBM8A PE=1 SV=1 - [RBM8A_HUMAN]                                                             |
| Q96T51 | RUN and FYVE domain-containing protein 1 OS=Homo sapiens GN=RUFY1 PE=1 SV=2 - [RUFY1_HUMAN]                                           |
| Q9Y265 | RuvB-like 1 OS=Homo sapiens GN=RUVBL1 PE=1 SV=1 - [RUVB1_HUMAN]                                                                       |
| Q9Y230 | RuvB-like 2 OS=Homo sapiens GN=RUVBL2 PE=1 SV=3 - [RUVB2_HUMAN]                                                                       |
| P31153 | S-adenosylmethionine synthase isoform type-2 OS=Homo sapiens GN=MAT2A PE=1 SV=1 - [METK2_HUMAN]                                       |
| P10768 | S-formylglutathione hydrolase OS=Homo sapiens GN=ESD PE=1 SV=2 - [ESTD_HUMAN]                                                         |
| Q13126 | S-methyl-5'-thioadenosine phosphorylase OS=Homo sapiens GN=MTAP PE=1 SV=2 - [MTAP_HUMAN]                                              |
| Q9UDX3 | SEC14-like protein 4 OS=Homo sapiens GN=SEC14L4 PE=2 SV=1 - [S14L4_HUMAN]                                                             |
| Q13228 | Selenium-binding protein 1 OS=Homo sapiens GN=SELENBP1 PE=1 SV=2 - [SBP1_HUMAN]                                                       |
| Q96T21 | Selenocysteine insertion sequence-binding protein 2 OS=Homo sapiens GN=SECISBP2 PE=1 SV=2 - [SEBP2_HUMAN]                             |
| Q9UHD8 | Septin-9 OS=Homo sapiens GN=SEPT9 PE=1 SV=2 - [SEPT9_HUMAN]                                                                           |
| Q96GA7 | Serine dehydratase-like OS=Homo sapiens GN=SDSL PE=1 SV=1 - [SDSL_HUMAN]                                                              |
| O43464 | Serine protease HTRA2, mitochondrial OS=Homo sapiens GN=HTRA2 PE=1 SV=2 - [HTRA2_HUMAN]                                               |
| Q07955 | Serine/arginine-rich splicing factor 1 OS=Homo sapiens GN=SRSF1 PE=1 SV=2 - [SRSF1_HUMAN]                                             |
| Q08170 | Serine/arginine-rich splicing factor 4 OS=Homo sapiens GN=SRSF4 PE=1 SV=2 - [SRSF4_HUMAN]                                             |
| Q13242 | Serine/arginine-rich splicing factor 9 OS=Homo sapiens GN=SRSF9 PE=1 SV=1 - [SRSF9_HUMAN]                                             |
| Q9Y5S2 | Serine/threonine-protein kinase MRCK beta OS=Homo sapiens GN=CDC42BPB PE=1 SV=2 - [MRCKB_HUMAN]                                       |
| O95747 | Serine/threonine-protein kinase OSR1 OS=Homo sapiens GN=OSXR1 PE=1 SV=1 - [OSXR1_HUMAN]                                               |
| Q9BRS2 | Serine/threonine-protein kinase RIO1 OS=Homo sapiens GN=RIOK1 PE=1 SV=2 - [RIOK1_HUMAN]                                               |
| Q15173 | Serine/threonine-protein phosphatase 2A 56 kDa regulatory subunit beta isoform OS=Homo sapiens GN=PPP2R5B PE=1 SV=1 - [2A5B_HUMAN]    |
| P30153 | Serine/threonine-protein phosphatase 2A 65 kDa regulatory subunit A alpha isoform OS=Homo sapiens GN=PPP2R1A PE=1 SV=4 - [2AAA_HUMAN] |
| P30154 | Serine/threonine-protein phosphatase 2A 65 kDa regulatory subunit A beta isoform OS=Homo sapiens GN=PPP2R1B PE=1 SV=3 - [2AAB_HUMAN]  |
| P67775 | Serine/threonine-protein phosphatase 2A catalytic subunit alpha isoform OS=Homo sapiens GN=PPP2CA PE=1 SV=1 - [PP2AA_HUMAN]           |
| O15084 | Serine/threonine-protein phosphatase 6 regulatory ankyrin repeat subunit A OS=Homo sapiens GN=ANKRD28 PE=1 SV=5 - [ANR28_HUMAN]       |
| E9PMD7 | Serine/threonine-protein phosphatase OS=Homo sapiens GN=PPP1CA PE=3 SV=1 - [E9PMD7_HUMAN]                                             |
| B4DDZ8 | Serine/threonine-protein phosphatase OS=Homo sapiens GN=PPP5C PE=2 SV=1 - [B4DDZ8_HUMAN]                                              |

|        |                                                                                                                          |
|--------|--------------------------------------------------------------------------------------------------------------------------|
| O14830 | Serine/threonine-protein phosphatase with EF-hands 2 OS=Homo sapiens GN=PPEF2 PE=1 SV=2 - [PPE2_HUMAN]                   |
| P02787 | Serotransferrin OS=Homo sapiens GN=TF PE=1 SV=3 - [TRFE_HUMAN]                                                           |
| Q9BXP5 | Serrate RNA effector molecule homolog OS=Homo sapiens GN=SRRT PE=1 SV=1 - [SRRT_HUMAN]                                   |
| O95810 | Serum deprivation-response protein OS=Homo sapiens GN=SDPR PE=1 SV=3 - [SDPR_HUMAN]                                      |
| P49591 | Seryl-tRNA synthetase, cytoplasmic OS=Homo sapiens GN=SARS PE=1 SV=3 - [SYSC_HUMAN]                                      |
| Q9C0A6 | SET domain-containing protein 5 OS=Homo sapiens GN=SETD5 PE=1 SV=2 - [SETD5_HUMAN]                                       |
| B2REB8 | SET nuclear oncogene OS=Homo sapiens GN=SET PE=3 SV=1 - [B2REB8_HUMAN]                                                   |
| Q8N228 | Sex comb on midleg-like protein 4 OS=Homo sapiens GN=SCML4 PE=2 SV=2 - [SCML4_HUMAN]                                     |
| Q5T123 | SH3 domain binding glutamic acid-rich protein like 3 OS=Homo sapiens GN=SH3BGRL3 PE=2 SV=1 - [Q5T123_HUMAN]              |
| O75368 | SH3 domain-binding glutamic acid-rich-like protein OS=Homo sapiens GN=SH3BGRL PE=1 SV=1 - [SH3L1_HUMAN]                  |
| Q9BQI5 | SH3-containing GRB2-like protein 3-interacting protein 1 OS=Homo sapiens GN=SGIP1 PE=1 SV=2 - [SGIP1_HUMAN]              |
| B7ZC39 | SH3-domain GRB2-like endophilin B2 OS=Homo sapiens GN=SH3GLB2 PE=4 SV=1 - [B7ZC39_HUMAN]                                 |
| Q9NR45 | Sialic acid synthase OS=Homo sapiens GN=NANS PE=1 SV=2 - [SIAS_HUMAN]                                                    |
| Q6P4A7 | Sideroflexin-4 OS=Homo sapiens GN=SFXN4 PE=1 SV=1 - [SFXN4_HUMAN]                                                        |
| P37108 | Signal recognition particle 14 kDa protein OS=Homo sapiens GN=SRP14 PE=1 SV=2 - [SRP14_HUMAN]                            |
| O76094 | Signal recognition particle 72 kDa protein OS=Homo sapiens GN=SRP72 PE=1 SV=3 - [SRP72_HUMAN]                            |
| P49458 | Signal recognition particle 9 kDa protein OS=Homo sapiens GN=SRP9 PE=1 SV=2 - [SRP09_HUMAN]                              |
| Q1KLZ6 | Signal transducer and activator of transcription 5A variant delta5 OS=Homo sapiens GN=STAT5A PE=2 SV=1 - [Q1KLZ6_HUMAN]  |
| O00241 | Signal-regulatory protein beta-1 OS=Homo sapiens GN=SIRPB1 PE=1 SV=5 - [SIRB1_HUMAN]                                     |
| Q8IW23 | Similar to glutamate receptor, ionotropic, N-methyl D-aspartate 2C (Fragment) OS=Homo sapiens PE=2 SV=1 - [Q8IW23_HUMAN] |
| O43805 | Sjogren syndrome nuclear autoantigen 1 OS=Homo sapiens GN=SSNA1 PE=1 SV=2 - [SSNA1_HUMAN]                                |
| Q96G53 | SLC27A4 protein OS=Homo sapiens GN=SLC27A4 PE=2 SV=1 - [Q96G53_HUMAN]                                                    |
| P62306 | Small nuclear ribonucleoprotein F OS=Homo sapiens GN=SNRPF PE=1 SV=1 - [RUXF_HUMAN]                                      |
| Q5SZX1 | Smg-5 homolog, nonsense mediated mRNA decay factor (C. elegans) OS=Homo sapiens GN=SMG5 PE=2 SV=1 - [Q5SZX1_HUMAN]       |
| A2RRQ7 | SNRNP200 protein OS=Homo sapiens GN=SNRNP200 PE=2 SV=1 - [A2RRQ7_HUMAN]                                                  |
| C0H5W9 | SNX6 protein OS=Homo sapiens GN=SNX6 PE=2 SV=1 - [C0H5W9_HUMAN]                                                          |
| P48066 | Sodium- and chloride-dependent GABA transporter 3 OS=Homo sapiens GN=SLC6A11 PE=2 SV=1 - [S6A11_HUMAN]                   |
| P11166 | Solute carrier family 2, facilitated glucose transporter member 1 OS=Homo sapiens GN=SLC2A1 PE=1 SV=2 - [GTR1_HUMAN]     |
| A5X8Z9 | Solute carrier family 24 member 5 OS=Homo sapiens GN=SLC24A5 PE=2 SV=1 - [A5X8Z9_HUMAN]                                  |
| Q00796 | Sorbitol dehydrogenase OS=Homo sapiens GN=SORD PE=1 SV=4 - [DHSO_HUMAN]                                                  |
| A6NKH4 | Sorting nexin 1, isoform CRA_d OS=Homo sapiens GN=SNX1 PE=4 SV=2 - [A6NKH4_HUMAN]                                        |
| O60493 | Sorting nexin-3 OS=Homo sapiens GN=SNX3 PE=1 SV=3 - [SNX3_HUMAN]                                                         |
| Q9Y5X1 | Sorting nexin-9 OS=Homo sapiens GN=SNX9 PE=1 SV=1 - [SNX9_HUMAN]                                                         |
| Q8N0X7 | Spartin OS=Homo sapiens GN=SPG20 PE=1 SV=1 - [SPG20_HUMAN]                                                               |
| P02549 | Spectrin alpha chain, erythrocyte OS=Homo sapiens GN=SPTA1 PE=1 SV=5 - [SPTA1_HUMAN]                                     |
| O15020 | Spectrin beta chain, brain 2 OS=Homo sapiens GN=SPTBN2 PE=1 SV=3 - [SPTN2_HUMAN]                                         |
| P11277 | Spectrin beta chain, erythrocyte OS=Homo sapiens GN=SPTB PE=1 SV=5 - [SPTB1_HUMAN]                                       |
| Q9C093 | Sperm flagellar protein 2 OS=Homo sapiens GN=SPEF2 PE=1 SV=2 - [SPEF2_HUMAN]                                             |
| Q8NA61 | Spermatid-associated protein OS=Homo sapiens GN=SPERT PE=2 SV=1 - [SPERT_HUMAN]                                          |
| Q9P0W8 | Spermatogenesis-associated protein 7 OS=Homo sapiens GN=SPATA7 PE=2 SV=3 - [SPAT7_HUMAN]                                 |
| P52788 | Spermine synthase OS=Homo sapiens GN=SMS PE=1 SV=2 - [SPSY_HUMAN]                                                        |
| P26368 | Splicing factor U2AF 65 kDa subunit OS=Homo sapiens GN=U2AF2 PE=1 SV=4 - [U2AF2_HUMAN]                                   |
| B3KUY1 | Splicing factor, arginine/serine-rich 2, isoform CRA_d OS=Homo sapiens GN=SFRS2 PE=2 SV=1 - [B3KUY1_HUMAN]               |

|        |                                                                                                                                                     |
|--------|-----------------------------------------------------------------------------------------------------------------------------------------------------|
| Q9P2P6 | StAR-related lipid transfer protein 9 OS=Homo sapiens GN=STARD9 PE=2 SV=2 - [STAR9_HUMAN]                                                           |
| P16949 | Stathmin OS=Homo sapiens GN=STMN1 PE=1 SV=3 - [STMN1_HUMAN]                                                                                         |
| B7Z5G4 | Stathmin OS=Homo sapiens GN=STMN3 PE=2 SV=1 - [B7Z5G4_HUMAN]                                                                                        |
| Q9H2G2 | STE20-like serine/threonine-protein kinase OS=Homo sapiens GN=SLK PE=1 SV=1 - [SLK_HUMAN]                                                           |
| Q8IZD0 | Sterile alpha motif domain-containing protein 14 OS=Homo sapiens GN=SAMD14 PE=2 SV=2 - [SAM14_HUMAN]                                                |
| P31948 | Stress-induced-phosphoprotein 1 OS=Homo sapiens GN=STIP1 PE=1 SV=1 - [STIP1_HUMAN]                                                                  |
| Q14683 | Structural maintenance of chromosomes protein 1A OS=Homo sapiens GN=SMC1A PE=1 SV=2 - [SMC1A_HUMAN]                                                 |
| O95347 | Structural maintenance of chromosomes protein 2 OS=Homo sapiens GN=SMC2 PE=1 SV=2 - [SMC2_HUMAN]                                                    |
| Q9BYN0 | Sulfiredoxin-1 OS=Homo sapiens GN=SRXN1 PE=1 SV=2 - [SRXN1_HUMAN]                                                                                   |
| P00441 | Superoxide dismutase [Cu-Zn] OS=Homo sapiens GN=SOD1 PE=1 SV=2 - [SODC_HUMAN]                                                                       |
| O60284 | Suppression of tumorigenicity 18 protein OS=Homo sapiens GN=ST18 PE=1 SV=1 - [ST18_HUMAN]                                                           |
| Q9Y2Z0 | Suppressor of G2 allele of SKP1 homolog OS=Homo sapiens GN=SUGT1 PE=1 SV=3 - [SUGT1_HUMAN]                                                          |
| O75683 | Surfeit locus protein 6 OS=Homo sapiens GN=SURF6 PE=1 SV=3 - [SURF6_HUMAN]                                                                          |
| Q59GV3 | SWI/SNF-related matrix-associated actin-dependent regulator of chromatin c2 isoform b variant (Fragment) OS=Homo sapiens PE=2 SV=1 - [Q59GV3_HUMAN] |
| O15498 | Synaptobrevin homolog YKT6 OS=Homo sapiens GN=YKT6 PE=1 SV=1 - [YKT6_HUMAN]                                                                         |
| Q96C24 | Synaptotagmin-like protein 4 OS=Homo sapiens GN=SYTL4 PE=1 SV=2 - [SYTL4_HUMAN]                                                                     |
| Q9NPQ8 | Synembryn-A OS=Homo sapiens GN=RIC8A PE=1 SV=3 - [RIC8A_HUMAN]                                                                                      |
| Q96SF7 | T-box transcription factor TBX15 OS=Homo sapiens GN=TBX15 PE=2 SV=2 - [TBX15_HUMAN]                                                                 |
| P17987 | T-complex protein 1 subunit alpha OS=Homo sapiens GN=TCP1 PE=1 SV=1 - [TCPA_HUMAN]                                                                  |
| P78371 | T-complex protein 1 subunit beta OS=Homo sapiens GN=CCT2 PE=1 SV=4 - [TCPB_HUMAN]                                                                   |
| P50991 | T-complex protein 1 subunit delta OS=Homo sapiens GN=CCT4 PE=1 SV=4 - [TCPD_HUMAN]                                                                  |
| P50990 | T-complex protein 1 subunit theta OS=Homo sapiens GN=CCT8 PE=1 SV=4 - [TCPQ_HUMAN]                                                                  |
| P40227 | T-complex protein 1 subunit zeta OS=Homo sapiens GN=CCT6A PE=1 SV=3 - [TCPZ_HUMAN]                                                                  |
| Q92526 | T-complex protein 1 subunit zeta-2 OS=Homo sapiens GN=CCT6B PE=1 SV=5 - [TCPW_HUMAN]                                                                |
| Q8N4U5 | T-complex protein 11-like protein 2 OS=Homo sapiens GN=TCP11L2 PE=2 SV=1 - [T11L2_HUMAN]                                                            |
| Q5TCU6 | Talin 1 OS=Homo sapiens GN=TLN1 PE=2 SV=1 - [Q5TCU6_HUMAN]                                                                                          |
| Q9Y4G6 | Talin-2 OS=Homo sapiens GN=TLN2 PE=1 SV=4 - [TLN2_HUMAN]                                                                                            |
| B1AKP7 | TAR DNA binding protein OS=Homo sapiens GN=TARDBP PE=4 SV=1 - [B1AKP7_HUMAN]                                                                        |
| P59537 | Taste receptor type 2 member 43 OS=Homo sapiens GN=TAS2R43 PE=2 SV=1 - [T2R43_HUMAN]                                                                |
| Q8TBP0 | TBC1 domain family member 16 OS=Homo sapiens GN=TBC1D16 PE=1 SV=1 - [TBC16_HUMAN]                                                                   |
| O95759 | TBC1 domain family member 8 OS=Homo sapiens GN=TBC1D8 PE=1 SV=3 - [TBCD8_HUMAN]                                                                     |
| A8K8E1 | TBC1 domain family, member 15, isoform CRA_d OS=Homo sapiens GN=TBC1D15 PE=2 SV=1 - [A8K8E1_HUMAN]                                                  |
| Q9NYB0 | Telomeric repeat-binding factor 2-interacting protein 1 OS=Homo sapiens GN=TERF2IP PE=1 SV=1 - [TE2IP_HUMAN]                                        |
| Q59G71 | Tensin variant (Fragment) OS=Homo sapiens PE=2 SV=1 - [Q59G71_HUMAN]                                                                                |
| Q99614 | Tetratricopeptide repeat protein 1 OS=Homo sapiens GN=TTC1 PE=1 SV=1 - [TTC1_HUMAN]                                                                 |
| P52888 | Thimet oligopeptidase OS=Homo sapiens GN=THOP1 PE=1 SV=2 - [THOP1_HUMAN]                                                                            |
| Q9BRA2 | Thioredoxin domain-containing protein 17 OS=Homo sapiens GN=TXNDC17 PE=1 SV=1 - [TXD17_HUMAN]                                                       |
| B1ALW1 | Thioredoxin OS=Homo sapiens GN=TXN PE=4 SV=1 - [B1ALW1_HUMAN]                                                                                       |
| O43396 | Thioredoxin-like protein 1 OS=Homo sapiens GN=TXNL1 PE=1 SV=3 - [TXNL1_HUMAN]                                                                       |
| P26639 | Threonyl-tRNA synthetase, cytoplasmic OS=Homo sapiens GN=TARS PE=1 SV=3 - [SYTC_HUMAN]                                                              |
| P23919 | Thymidylate kinase OS=Homo sapiens GN=DTYMK PE=1 SV=4 - [KTHY_HUMAN]                                                                                |
| P0CG34 | Thymosin beta-15A OS=Homo sapiens GN=TMSB15A PE=1 SV=1 - [TB15A_HUMAN]                                                                              |
| A8MW06 | Thymosin beta-4-like protein 3 OS=Homo sapiens GN=TMSL3 PE=2 SV=1 - [TMSL3_HUMAN]                                                                   |

|        |                                                                                                                                               |
|--------|-----------------------------------------------------------------------------------------------------------------------------------------------|
| O75663 | TIP41-like protein OS=Homo sapiens GN=TIPRL PE=1 SV=2 - [TIPRL_HUMAN]                                                                         |
| Q9NYK1 | Toll-like receptor 7 OS=Homo sapiens GN=TLR7 PE=1 SV=1 - [TLR7_HUMAN]                                                                         |
| Q6LBI8 | Topoisomerase IIb (Fragment) OS=Homo sapiens GN=topIIb PE=2 SV=1 - [Q6LBI8_HUMAN]                                                             |
| O14804 | Trace amine-associated receptor 5 OS=Homo sapiens GN=TAAR5 PE=2 SV=2 - [TAAR5_HUMAN]                                                          |
| A6NDN0 | Trafficking protein particle complex 3, isoform CRA_a OS=Homo sapiens GN=TRAPPC3 PE=4 SV=1 - [A6NDN0_HUMAN]                                   |
| P37837 | Transaldolase OS=Homo sapiens GN=TALDO1 PE=1 SV=2 - [TALDO_HUMAN]                                                                             |
| P23193 | Transcription elongation factor A protein 1 OS=Homo sapiens GN=TCEA1 PE=1 SV=2 - [TCEA1_HUMAN]                                                |
| B8ZZU8 | Transcription elongation factor B (SIII), polypeptide 2 (18kDa, elongin B), isoform CRA_b OS=Homo sapiens GN=TCEB2 PE=4 SV=1 - [B8ZZU8_HUMAN] |
| Q5VWG9 | Transcription initiation factor TFIID subunit 3 OS=Homo sapiens GN=TAF3 PE=1 SV=1 - [TAF3_HUMAN]                                              |
| Q13263 | Transcription intermediary factor 1-beta OS=Homo sapiens GN=TRIM28 PE=1 SV=5 - [TIF1B_HUMAN]                                                  |
| Q00577 | Transcriptional activator protein Pur-alpha OS=Homo sapiens GN=PURA PE=1 SV=2 - [PURA_HUMAN]                                                  |
| P02786 | Transferrin receptor protein 1 OS=Homo sapiens GN=TFRC PE=1 SV=2 - [TFR1_HUMAN]                                                               |
| B9ZVW9 | Transforming growth factor, beta-induced, 68kDa, isoform CRA_a OS=Homo sapiens GN=TGFBI PE=4 SV=1 - [B9ZVW9_HUMAN]                            |
| P61586 | Transforming protein RhoA OS=Homo sapiens GN=RHOA PE=1 SV=1 - [RHOA_HUMAN]                                                                    |
| P37802 | Transgelin-2 OS=Homo sapiens GN=TAGLN2 PE=1 SV=3 - [TAGL2_HUMAN]                                                                              |
| P55072 | Transitional endoplasmic reticulum ATPase OS=Homo sapiens GN=VCP PE=1 SV=4 - [TERA_HUMAN]                                                     |
| P13693 | Translationally-controlled tumor protein OS=Homo sapiens GN=TPT1 PE=1 SV=1 - [TCTP_HUMAN]                                                     |
| Q99598 | Translin-associated protein X OS=Homo sapiens GN=TSNAX PE=1 SV=1 - [TSNAX_HUMAN]                                                              |
| Q6IN77 | Transportin 2 OS=Homo sapiens GN=TNPO2 PE=2 SV=1 - [Q6IN77_HUMAN]                                                                             |
| Q92973 | Transportin-1 OS=Homo sapiens GN=TNPO1 PE=1 SV=2 - [TNPO1_HUMAN]                                                                              |
| P22102 | Trifunctional purine biosynthetic protein adenosine-3 OS=Homo sapiens GN=GART PE=1 SV=1 - [PUR2_HUMAN]                                        |
| P60174 | Triosephosphate isomerase OS=Homo sapiens GN=TPI1 PE=1 SV=2 - [TPIS_HUMAN]                                                                    |
| Q5SRJ5 | Tripartite motif-containing 10 OS=Homo sapiens GN=TRIM10 PE=2 SV=1 - [Q5SRJ5_HUMAN]                                                           |
| Q8NG06 | Tripartite motif-containing protein 58 OS=Homo sapiens GN=TRIM58 PE=2 SV=2 - [TRI58_HUMAN]                                                    |
| P29144 | Tripeptidyl-peptidase 2 OS=Homo sapiens GN=TPP2 PE=1 SV=4 - [TPP2_HUMAN]                                                                      |
| O95620 | tRNA-dihydrouridine synthase 4-like OS=Homo sapiens GN=DUS4L PE=2 SV=2 - [DUS4L_HUMAN]                                                        |
| D9YZV5 | Tropomyosin 1 (Alpha) isoform 4 OS=Homo sapiens GN=TPM1 PE=3 SV=1 - [D9YZV5_HUMAN]                                                            |
| D9YZV7 | Tropomyosin 1 (Alpha) isoform 6 OS=Homo sapiens GN=TPM1 PE=3 SV=1 - [D9YZV7_HUMAN]                                                            |
| Q5VU58 | Tropomyosin 3 OS=Homo sapiens GN=TPM3 PE=2 SV=1 - [Q5VU58_HUMAN]                                                                              |
| Q5VU59 | Tropomyosin 3 OS=Homo sapiens GN=TPM3 PE=2 SV=1 - [Q5VU59_HUMAN]                                                                              |
| Q5VU61 | Tropomyosin 3 OS=Homo sapiens GN=TPM3 PE=2 SV=1 - [Q5VU61_HUMAN]                                                                              |
| Q5VU66 | Tropomyosin 3 OS=Homo sapiens GN=TPM3 PE=2 SV=1 - [Q5VU66_HUMAN]                                                                              |
| P06753 | Tropomyosin alpha-3 chain OS=Homo sapiens GN=TPM3 PE=1 SV=1 - [TPM3_HUMAN]                                                                    |
| Q5LJ98 | TROVE domain family, member 2 OS=Homo sapiens GN=TROVE2 PE=2 SV=1 - [Q5LJ98_HUMAN]                                                            |
| P23381 | Tryptophanyl-tRNA synthetase, cytoplasmic OS=Homo sapiens GN=WARS PE=1 SV=2 - [SYWC_HUMAN]                                                    |
| O75157 | TSC22 domain family protein 2 OS=Homo sapiens GN=TSC22D2 PE=1 SV=3 - [T22D2_HUMAN]                                                            |
| Q9BQE3 | Tubulin alpha-1C chain OS=Homo sapiens GN=TUBA1C PE=1 SV=1 - [TBA1C_HUMAN]                                                                    |
| P68371 | Tubulin beta-2C chain OS=Homo sapiens GN=TUBB2C PE=1 SV=1 - [TBB2C_HUMAN]                                                                     |
| B1AH89 | Tubulin tyrosine ligase-like family, member 12 OS=Homo sapiens GN=TTLL12 PE=4 SV=1 - [B1AH89_HUMAN]                                           |
| Q5QJ74 | Tubulin-specific chaperone cofactor E-like protein OS=Homo sapiens GN=TBCEL PE=2 SV=2 - [TBCEL_HUMAN]                                         |
| Q15813 | Tubulin-specific chaperone E OS=Homo sapiens GN=TBCE PE=1 SV=1 - [TBCE_HUMAN]                                                                 |
| A8MUB1 | Tubulin, alpha 1 (Testis specific), isoform CRA_a OS=Homo sapiens GN=TUBA4A PE=2 SV=1 - [A8MUB1_HUMAN]                                        |
| Q9UIG0 | Tyrosine-protein kinase BAZ1B OS=Homo sapiens GN=BAZ1B PE=1 SV=2 - [BAZ1B_HUMAN]                                                              |

|        |                                                                                                                                         |
|--------|-----------------------------------------------------------------------------------------------------------------------------------------|
| Q06124 | Tyrosine-protein phosphatase non-receptor type 11 OS=Homo sapiens GN=PTPN11 PE=1 SV=2 - [PTN11_HUMAN]                                   |
| P54577 | Tyrosyl-tRNA synthetase, cytoplasmic OS=Homo sapiens GN=YARS PE=1 SV=4 - [SYYC_HUMAN]                                                   |
| Q15696 | U2 small nuclear ribonucleoprotein auxiliary factor 35 kDa subunit-related protein 2 OS=Homo sapiens GN=ZRSR2 PE=1 SV=2 - [U2AFM_HUMAN] |
| O43818 | U3 small nucleolar RNA-interacting protein 2 OS=Homo sapiens GN=RRP9 PE=1 SV=1 - [U3IP2_HUMAN]                                          |
| O15116 | U6 snRNA-associated Sm-like protein LSM1 OS=Homo sapiens GN=LSM1 PE=1 SV=1 - [LSM1_HUMAN]                                               |
| Q9Y333 | U6 snRNA-associated Sm-like protein LSM2 OS=Homo sapiens GN=LSM2 PE=1 SV=1 - [LSM2_HUMAN]                                               |
| Q9Y4Z0 | U6 snRNA-associated Sm-like protein LSM4 OS=Homo sapiens GN=LSM4 PE=1 SV=1 - [LSM4_HUMAN]                                               |
| P62312 | U6 snRNA-associated Sm-like protein LSM6 OS=Homo sapiens GN=LSM6 PE=1 SV=1 - [LSM6_HUMAN]                                               |
| Q9UK45 | U6 snRNA-associated Sm-like protein LSM7 OS=Homo sapiens GN=LSM7 PE=1 SV=1 - [LSM7_HUMAN]                                               |
| Q5TBK7 | Ubiquitin carboxyl-terminal esterase L3 (Ubiquitin thioesterase) (Fragment) OS=Homo sapiens GN=UCHL3 PE=2 SV=1 - [Q5TBK7_HUMAN]         |
| A6NCW0 | Ubiquitin carboxyl-terminal hydrolase 17-like protein 3 OS=Homo sapiens GN=USP17L3 PE=3 SV=1 - [U17L3_HUMAN]                            |
| P45974 | Ubiquitin carboxyl-terminal hydrolase 5 OS=Homo sapiens GN=USP5 PE=1 SV=2 - [UBP5_HUMAN]                                                |
| A6NJA2 | Ubiquitin carboxyl-terminal hydrolase OS=Homo sapiens GN=USP14 PE=3 SV=1 - [A6NJA2_HUMAN]                                               |
| E9PCQ3 | Ubiquitin carboxyl-terminal hydrolase OS=Homo sapiens GN=USP15 PE=3 SV=2 - [E9PCQ3_HUMAN]                                               |
| B7WPF4 | Ubiquitin carboxyl-terminal hydrolase OS=Homo sapiens GN=USP24 PE=3 SV=2 - [B7WPF4_HUMAN]                                               |
| E9PM46 | Ubiquitin carboxyl-terminal hydrolase OS=Homo sapiens GN=USP47 PE=3 SV=1 - [E9PM46_HUMAN]                                               |
| B4DKA8 | Ubiquitin carboxyl-terminal hydrolase OS=Homo sapiens GN=USP8 PE=2 SV=1 - [B4DKA8_HUMAN]                                                |
| D6RAW0 | Ubiquitin carrier protein OS=Homo sapiens GN=UBE2D3 PE=3 SV=1 - [D6RAW0_HUMAN]                                                          |
| C9JZY6 | Ubiquitin carrier protein OS=Homo sapiens GN=UBE2H PE=3 SV=1 - [C9JZY6_HUMAN]                                                           |
| F5GX52 | Ubiquitin carrier protein OS=Homo sapiens PE=3 SV=1 - [F5GX52_HUMAN]                                                                    |
| Q14139 | Ubiquitin conjugation factor E4 A OS=Homo sapiens GN=UBE4A PE=1 SV=2 - [UBE4A_HUMAN]                                                    |
| Q5VVQ6 | Ubiquitin thioesterase OTU1 OS=Homo sapiens GN=YOD1 PE=1 SV=1 - [OTU1_HUMAN]                                                            |
| P62979 | Ubiquitin-40S ribosomal protein S27a OS=Homo sapiens GN=RPS27A PE=1 SV=2 - [RS27A_HUMAN]                                                |
| Q9BSL1 | Ubiquitin-associated domain-containing protein 1 OS=Homo sapiens GN=UBAC1 PE=1 SV=1 - [UBAC1_HUMAN]                                     |
| P61088 | Ubiquitin-conjugating enzyme E2 N OS=Homo sapiens GN=UBE2N PE=1 SV=1 - [UBE2N_HUMAN]                                                    |
| Q9C0C9 | Ubiquitin-conjugating enzyme E2 O OS=Homo sapiens GN=UBE2O PE=1 SV=3 - [UBE2O_HUMAN]                                                    |
| P49427 | Ubiquitin-conjugating enzyme E2 R1 OS=Homo sapiens GN=CDC34 PE=1 SV=2 - [UB2R1_HUMAN]                                                   |
| Q13404 | Ubiquitin-conjugating enzyme E2 variant 1 OS=Homo sapiens GN=UBE2V1 PE=1 SV=2 - [UB2V1_HUMAN]                                           |
| Q15819 | Ubiquitin-conjugating enzyme E2 variant 2 OS=Homo sapiens GN=UBE2V2 PE=1 SV=4 - [UB2V2_HUMAN]                                           |
| P22314 | Ubiquitin-like modifier-activating enzyme 1 OS=Homo sapiens GN=UBA1 PE=1 SV=3 - [UBA1_HUMAN]                                            |
| A0AVT1 | Ubiquitin-like modifier-activating enzyme 6 OS=Homo sapiens GN=UBA6 PE=1 SV=1 - [UBA6_HUMAN]                                            |
| P05161 | Ubiquitin-like protein ISG15 OS=Homo sapiens GN=ISG15 PE=1 SV=5 - [ISG15_HUMAN]                                                         |
| Q9NT62 | Ubiquitin-like-conjugating enzyme ATG3 OS=Homo sapiens GN=ATG3 PE=1 SV=1 - [ATG3_HUMAN]                                                 |
| Q5QPP1 | UDP-galactose-4-epimerase (Fragment) OS=Homo sapiens GN=GALE PE=2 SV=1 - [Q5QPP1_HUMAN]                                                 |
| Q9NYU2 | UDP-glucose:glycoprotein glucosyltransferase 1 OS=Homo sapiens GN=UGGT1 PE=1 SV=3 - [UGGG1_HUMAN]                                       |
| Q9Y4X1 | UDP-glucuronosyltransferase 2A1 OS=Homo sapiens GN=UGT2A1 PE=1 SV=2 - [UD2A1_HUMAN]                                                     |
| O15294 | UDP-N-acetylglucosamine--peptide N-acetylglucosaminyltransferase 110 kDa subunit OS=Homo sapiens GN=OGT PE=1 SV=3 - [OGT1_HUMAN]        |
| P30085 | UMP-CMP kinase OS=Homo sapiens GN=CMPK1 PE=1 SV=3 - [KCY_HUMAN]                                                                         |
| Q3MIX3 | Uncharacterized aarF domain-containing protein kinase 5 OS=Homo sapiens GN=ADCK5 PE=2 SV=2 - [ADCK5_HUMAN]                              |
| B4DGV4 | Uncharacterized protein (Fragment) OS=Homo sapiens GN=RYSR2 PE=2 SV=1 - [B4DGV4_HUMAN]                                                  |
| Q7Z3E2 | Uncharacterized protein C10orf118 OS=Homo sapiens GN=C10orf118 PE=2 SV=2 - [CJ118_HUMAN]                                                |
| Q96LP6 | Uncharacterized protein C12orf42 OS=Homo sapiens GN=C12orf42 PE=2 SV=2 - [CL042_HUMAN]                                                  |
| Q4W4Y0 | Uncharacterized protein C14orf28 OS=Homo sapiens GN=C14orf28 PE=2 SV=1 - [CN028_HUMAN]                                                  |

|        |                                                                                        |
|--------|----------------------------------------------------------------------------------------|
| Q9H972 | Uncharacterized protein C14orf93 OS=Homo sapiens GN=C14orf93 PE=2 SV=1 - [CN093_HUMAN] |
| Q5RHP9 | Uncharacterized protein C1orf173 OS=Homo sapiens GN=C1orf173 PE=2 SV=1 - [CA173_HUMAN] |
| Q6ICL3 | Uncharacterized protein C22orf25 OS=Homo sapiens GN=C22orf25 PE=2 SV=1 - [CV025_HUMAN] |
| Q8NC60 | Uncharacterized protein C4orf14 OS=Homo sapiens GN=C4orf14 PE=1 SV=2 - [CD014_HUMAN]   |
| Q9P0K9 | Uncharacterized protein C9orf4 OS=Homo sapiens GN=C9orf4 PE=2 SV=2 - [CI004_HUMAN]     |
| Q8IXQ3 | Uncharacterized protein C9orf40 OS=Homo sapiens GN=C9orf40 PE=1 SV=1 - [CI040_HUMAN]   |
| Q9UF83 | Uncharacterized protein DKFZp434B061 OS=Homo sapiens PE=2 SV=2 - [YM012_HUMAN]         |
| Q6ZSR9 | Uncharacterized protein FLJ45252 OS=Homo sapiens PE=1 SV=2 - [YJ005_HUMAN]             |
| Q6ZRH9 | Uncharacterized protein FLJ46347 OS=Homo sapiens PE=2 SV=1 - [YB011_HUMAN]             |
| O94964 | Uncharacterized protein KIAA0889 OS=Homo sapiens GN=KIAA0889 PE=1 SV=2 - [K0889_HUMAN] |
| Q8IXQ4 | Uncharacterized protein KIAA1704 OS=Homo sapiens GN=KIAA1704 PE=1 SV=1 - [K1704_HUMAN] |
| Q9C0B2 | Uncharacterized protein KIAA1751 OS=Homo sapiens GN=KIAA1751 PE=2 SV=2 - [K1751_HUMAN] |
| Q0VF49 | Uncharacterized protein KIAA2012 OS=Homo sapiens GN=KIAA2012 PE=2 SV=1 - [K2012_HUMAN] |
| C9JGD3 | Uncharacterized protein OS=Homo sapiens GN=A1CF PE=4 SV=2 - [C9JGD3_HUMAN]             |
| E9PG46 | Uncharacterized protein OS=Homo sapiens GN=AAK1 PE=4 SV=1 - [E9PG46_HUMAN]             |
| F5GYC1 | Uncharacterized protein OS=Homo sapiens GN=ABCD3 PE=3 SV=1 - [F5GYC1_HUMAN]            |
| D6R9I9 | Uncharacterized protein OS=Homo sapiens GN=ABCE1 PE=4 SV=1 - [D6R9I9_HUMAN]            |
| B4DNR3 | Uncharacterized protein OS=Homo sapiens GN=ABHD14B PE=2 SV=1 - [B4DNR3_HUMAN]          |
| B4DUX0 | Uncharacterized protein OS=Homo sapiens GN=ACOT7 PE=2 SV=1 - [B4DUX0_HUMAN]            |
| E9PIS4 | Uncharacterized protein OS=Homo sapiens GN=ACOT8 PE=4 SV=1 - [E9PIS4_HUMAN]            |
| F5H4B8 | Uncharacterized protein OS=Homo sapiens GN=ACSM2A PE=4 SV=1 - [F5H4B8_HUMAN]           |
| F5H0N0 | Uncharacterized protein OS=Homo sapiens GN=ACTG1 PE=3 SV=1 - [F5H0N0_HUMAN]            |
| B4DXP9 | Uncharacterized protein OS=Homo sapiens GN=ACTR1A PE=2 SV=1 - [B4DXP9_HUMAN]           |
| B4DTI0 | Uncharacterized protein OS=Homo sapiens GN=ACTR3 PE=2 SV=1 - [B4DTI0_HUMAN]            |
| F5GXW0 | Uncharacterized protein OS=Homo sapiens GN=ADA PE=4 SV=1 - [F5GXW0_HUMAN]              |
| B7ZAL1 | Uncharacterized protein OS=Homo sapiens GN=ADH6 PE=2 SV=1 - [B7ZAL1_HUMAN]             |
| B7Z783 | Uncharacterized protein OS=Homo sapiens GN=ADK PE=2 SV=1 - [B7Z783_HUMAN]              |
| E9PEC0 | Uncharacterized protein OS=Homo sapiens GN=ADRM1 PE=4 SV=2 - [E9PEC0_HUMAN]            |
| C9J2I0 | Uncharacterized protein OS=Homo sapiens GN=AGFG1 PE=4 SV=1 - [C9J2I0_HUMAN]            |
| C9JSL3 | Uncharacterized protein OS=Homo sapiens GN=AKR7A2 PE=4 SV=2 - [C9JSL3_HUMAN]           |
| F5H4B6 | Uncharacterized protein OS=Homo sapiens GN=ALDH16A1 PE=4 SV=1 - [F5H4B6_HUMAN]         |
| E9PBX3 | Uncharacterized protein OS=Homo sapiens GN=ALDH1L1 PE=3 SV=1 - [E9PBX3_HUMAN]          |
| E9PGG4 | Uncharacterized protein OS=Homo sapiens GN=ALS2CR11 PE=4 SV=1 - [E9PGG4_HUMAN]         |
| A6NP16 | Uncharacterized protein OS=Homo sapiens GN=AMOT PE=4 SV=1 - [A6NP16_HUMAN]             |
| E9PKC5 | Uncharacterized protein OS=Homo sapiens GN=AMPD3 PE=4 SV=1 - [E9PKC5_HUMAN]            |
| E7EVE3 | Uncharacterized protein OS=Homo sapiens GN=ANK1 PE=4 SV=1 - [E7EVE3_HUMAN]             |
| D6RIY9 | Uncharacterized protein OS=Homo sapiens GN=ANK2 PE=4 SV=1 - [D6RIY9_HUMAN]             |
| E7EWS1 | Uncharacterized protein OS=Homo sapiens GN=ANKAR PE=4 SV=1 - [E7EWS1_HUMAN]            |
| F5H754 | Uncharacterized protein OS=Homo sapiens GN=ANKFY1 PE=4 SV=1 - [F5H754_HUMAN]           |
| B3KUC3 | Uncharacterized protein OS=Homo sapiens GN=ANKRD6 PE=2 SV=1 - [B3KUC3_HUMAN]           |
| F2Z3H3 | Uncharacterized protein OS=Homo sapiens GN=ANP32A PE=4 SV=2 - [F2Z3H3_HUMAN]           |
| B4DT77 | Uncharacterized protein OS=Homo sapiens GN=ANXA7 PE=2 SV=1 - [B4DT77_HUMAN]            |
| F5H0H0 | Uncharacterized protein OS=Homo sapiens GN=AP2M1 PE=4 SV=1 - [F5H0H0_HUMAN]            |

|               |                                                                                   |
|---------------|-----------------------------------------------------------------------------------|
| F5H093        | Uncharacterized protein OS=Homo sapiens GN=AP3B1 PE=4 SV=1 - [F5H093_HUMAN]       |
| E7EMM2        | Uncharacterized protein OS=Homo sapiens GN=AP3D1 PE=4 SV=1 - [E7EMM2_HUMAN]       |
| E9PC21        | Uncharacterized protein OS=Homo sapiens GN=AQP1 PE=3 SV=1 - [E9PC21_HUMAN]        |
| <i>B7ZB63</i> | <i>Uncharacterized protein OS=Homo sapiens GN=ARF3 PE=2 SV=1 - [B7ZB63_HUMAN]</i> |
| E9PNR6        | Uncharacterized protein OS=Homo sapiens GN=ARHGAP1 PE=4 SV=1 - [E9PNR6_HUMAN]     |
| C9JVJ3        | Uncharacterized protein OS=Homo sapiens GN=ARHGAP42 PE=4 SV=1 - [C9JVJ3_HUMAN]    |
| F5H6Q0        | Uncharacterized protein OS=Homo sapiens GN=ARHGDI1 PE=4 SV=1 - [F5H6Q0_HUMAN]     |
| E7EWX4        | Uncharacterized protein OS=Homo sapiens GN=ARPC4 PE=4 SV=1 - [E7EWX4_HUMAN]       |
| E9PE48        | Uncharacterized protein OS=Homo sapiens GN=ASL PE=3 SV=1 - [E9PE48_HUMAN]         |
| C9JAL9        | Uncharacterized protein OS=Homo sapiens GN=ASPSR1 PE=4 SV=1 - [C9JAL9_HUMAN]      |
| E9PBU3        | Uncharacterized protein OS=Homo sapiens GN=ATIC PE=4 SV=1 - [E9PBU3_HUMAN]        |
| E5RGN3        | Uncharacterized protein OS=Homo sapiens GN=ATOX1 PE=4 SV=1 - [E5RGN3_HUMAN]       |
| D6R9H7        | Uncharacterized protein OS=Homo sapiens GN=ATP5G1 PE=3 SV=1 - [D6R9H7_HUMAN]      |
| C9J8H9        | Uncharacterized protein OS=Homo sapiens GN=ATP5J2 PE=4 SV=1 - [C9J8H9_HUMAN]      |
| B7Z1R5        | Uncharacterized protein OS=Homo sapiens GN=ATP6V1A PE=2 SV=1 - [B7Z1R5_HUMAN]     |
| E7EV59        | Uncharacterized protein OS=Homo sapiens GN=ATP6V1C1 PE=4 SV=1 - [E7EV59_HUMAN]    |
| A8MUN4        | Uncharacterized protein OS=Homo sapiens GN=ATP6V1E1 PE=2 SV=1 - [A8MUN4_HUMAN]    |
| E9PGE6        | Uncharacterized protein OS=Homo sapiens GN=ATP6V1H PE=4 SV=1 - [E9PGE6_HUMAN]     |
| B5MEB7        | Uncharacterized protein OS=Homo sapiens GN=ATRIP PE=4 SV=2 - [B5MEB7_HUMAN]       |
| C9J9Y9        | Uncharacterized protein OS=Homo sapiens GN=BAG1 PE=4 SV=2 - [C9J9Y9_HUMAN]        |
| F5H239        | Uncharacterized protein OS=Homo sapiens GN=BAZ1A PE=4 SV=1 - [F5H239_HUMAN]       |
| E7EX43        | Uncharacterized protein OS=Homo sapiens GN=BBS9 PE=4 SV=1 - [E7EX43_HUMAN]        |
| E9PK09        | Uncharacterized protein OS=Homo sapiens GN=BCLAF1 PE=4 SV=1 - [E9PK09_HUMAN]      |
| F5H7R6        | Uncharacterized protein OS=Homo sapiens GN=BLM PE=4 SV=1 - [F5H7R6_HUMAN]         |
| B4DUS9        | Uncharacterized protein OS=Homo sapiens GN=BPNT1 PE=2 SV=1 - [B4DUS9_HUMAN]       |
| C9IZW4        | Uncharacterized protein OS=Homo sapiens GN=BRCA1 PE=4 SV=1 - [C9IZW4_HUMAN]       |
| E9PPN5        | Uncharacterized protein OS=Homo sapiens GN=BSCL2 PE=4 SV=1 - [E9PPN5_HUMAN]       |
| C9JB13        | Uncharacterized protein OS=Homo sapiens GN=BSDC1 PE=4 SV=1 - [C9JB13_HUMAN]       |
| E9PL10        | Uncharacterized protein OS=Homo sapiens GN=BTF3L4 PE=4 SV=1 - [E9PL10_HUMAN]      |
| E9PAX7        | Uncharacterized protein OS=Homo sapiens GN=C11orf49 PE=4 SV=1 - [E9PAX7_HUMAN]    |
| F5H641        | Uncharacterized protein OS=Homo sapiens GN=C12orf10 PE=4 SV=1 - [F5H641_HUMAN]    |
| E9PBZ7        | Uncharacterized protein OS=Homo sapiens GN=C13orf38 PE=4 SV=1 - [E9PBZ7_HUMAN]    |
| B5MC47        | Uncharacterized protein OS=Homo sapiens GN=C14orf135 PE=4 SV=1 - [B5MC47_HUMAN]   |
| C9IYA4        | Uncharacterized protein OS=Homo sapiens GN=C14orf80 PE=4 SV=1 - [C9IYA4_HUMAN]    |
| B8ZZ55        | Uncharacterized protein OS=Homo sapiens GN=C2orf70 PE=4 SV=1 - [B8ZZ55_HUMAN]     |
| B4DIY7        | Uncharacterized protein OS=Homo sapiens GN=C3orf31 PE=2 SV=1 - [B4DIY7_HUMAN]     |
| C9JF90        | Uncharacterized protein OS=Homo sapiens GN=C7orf25 PE=4 SV=1 - [C9JF90_HUMAN]     |
| C9JS17        | Uncharacterized protein OS=Homo sapiens GN=C7orf69 PE=4 SV=1 - [C9JS17_HUMAN]     |
| E7ER51        | Uncharacterized protein OS=Homo sapiens GN=CA3 PE=4 SV=2 - [E7ER51_HUMAN]         |
| B4DE01        | Uncharacterized protein OS=Homo sapiens GN=CAPZA2 PE=2 SV=1 - [B4DE01_HUMAN]      |
| C9JXR7        | Uncharacterized protein OS=Homo sapiens GN=CASP3 PE=4 SV=2 - [C9JXR7_HUMAN]       |
| D6RBM3        | Uncharacterized protein OS=Homo sapiens GN=CASP6 PE=4 SV=1 - [D6RBM3_HUMAN]       |
| E7EVY3        | Uncharacterized protein OS=Homo sapiens GN=CAST PE=4 SV=1 - [E7EVY3_HUMAN]        |



|        |                                                                               |
|--------|-------------------------------------------------------------------------------|
| E9PDE4 | Uncharacterized protein OS=Homo sapiens GN=CAST PE=4 SV=1 - [E9PDE4_HUMAN]    |
| B8ZZI4 | Uncharacterized protein OS=Homo sapiens GN=CCDC150 PE=4 SV=1 - [B8ZZI4_HUMAN] |
| C9JGU1 | Uncharacterized protein OS=Homo sapiens GN=CCDC66 PE=4 SV=2 - [C9JGU1_HUMAN]  |
| E9PAQ6 | Uncharacterized protein OS=Homo sapiens GN=CCT3 PE=3 SV=1 - [E9PAQ6_HUMAN]    |
| E7ENZ3 | Uncharacterized protein OS=Homo sapiens GN=CCT5 PE=4 SV=1 - [E7ENZ3_HUMAN]    |
| B4DTR2 | Uncharacterized protein OS=Homo sapiens GN=CDH5 PE=2 SV=1 - [B4DTR2_HUMAN]    |
| D6R973 | Uncharacterized protein OS=Homo sapiens GN=CDV3 PE=4 SV=1 - [D6R973_HUMAN]    |
| F5GYE8 | Uncharacterized protein OS=Homo sapiens GN=CEP112 PE=4 SV=1 - [F5GYE8_HUMAN]  |
| C9J710 | Uncharacterized protein OS=Homo sapiens GN=CEP70 PE=4 SV=1 - [C9J710_HUMAN]   |
| E9PP50 | Uncharacterized protein OS=Homo sapiens GN=CFL1 PE=4 SV=1 - [E9PP50_HUMAN]    |
| F5H2G1 | Uncharacterized protein OS=Homo sapiens GN=CHD4 PE=4 SV=1 - [F5H2G1_HUMAN]    |
| B4DIR6 | Uncharacterized protein OS=Homo sapiens GN=CHMP5 PE=2 SV=1 - [B4DIR6_HUMAN]   |
| F5H1F8 | Uncharacterized protein OS=Homo sapiens GN=CLIC4 PE=4 SV=1 - [F5H1F8_HUMAN]   |
| E9PMI6 | Uncharacterized protein OS=Homo sapiens GN=CLNS1A PE=4 SV=1 - [E9PMI6_HUMAN]  |
| B4DIN1 | Uncharacterized protein OS=Homo sapiens GN=CLTA PE=2 SV=1 - [B4DIN1_HUMAN]    |
| B4DP17 | Uncharacterized protein OS=Homo sapiens GN=CNBP PE=2 SV=1 - [B4DP17_HUMAN]    |
| F5H8M2 | Uncharacterized protein OS=Homo sapiens GN=COG6 PE=4 SV=1 - [F5H8M2_HUMAN]    |
| B4DIH5 | Uncharacterized protein OS=Homo sapiens GN=COPS2 PE=2 SV=1 - [B4DIH5_HUMAN]   |
| B4DY81 | Uncharacterized protein OS=Homo sapiens GN=COPS3 PE=2 SV=1 - [B4DY81_HUMAN]   |
| E7EM64 | Uncharacterized protein OS=Homo sapiens GN=COPS6 PE=4 SV=1 - [E7EM64_HUMAN]   |
| E7EUK5 | Uncharacterized protein OS=Homo sapiens GN=CPXM2 PE=4 SV=1 - [E7EUK5_HUMAN]   |
| B4DM67 | Uncharacterized protein OS=Homo sapiens GN=CSE1L PE=2 SV=1 - [B4DM67_HUMAN]   |
| E9PDV0 | Uncharacterized protein OS=Homo sapiens GN=CTH PE=3 SV=1 - [E9PDV0_HUMAN]     |
| F5GWW0 | Uncharacterized protein OS=Homo sapiens GN=CTSB PE=3 SV=1 - [F5GWW0_HUMAN]    |
| C9JH19 | Uncharacterized protein OS=Homo sapiens GN=CTSD PE=3 SV=1 - [C9JH19_HUMAN]    |
| E7EWR0 | Uncharacterized protein OS=Homo sapiens GN=CUL1 PE=3 SV=1 - [E7EWR0_HUMAN]    |
| A8MSH7 | Uncharacterized protein OS=Homo sapiens GN=CUL4A PE=3 SV=1 - [A8MSH7_HUMAN]   |
| E9PP19 | Uncharacterized protein OS=Homo sapiens GN=CUL5 PE=4 SV=1 - [E9PP19_HUMAN]    |
| C9JFR7 | Uncharacterized protein OS=Homo sapiens GN=CYCS PE=3 SV=1 - [C9JFR7_HUMAN]    |
| E7ERE8 | Uncharacterized protein OS=Homo sapiens GN=CYP20A1 PE=4 SV=1 - [E7ERE8_HUMAN] |
| F2Z305 | Uncharacterized protein OS=Homo sapiens GN=DCAF6 PE=4 SV=1 - [F2Z305_HUMAN]   |
| F5H5I7 | Uncharacterized protein OS=Homo sapiens GN=DCHS2 PE=4 SV=1 - [F5H5I7_HUMAN]   |
| E9PFS5 | Uncharacterized protein OS=Homo sapiens GN=DCTN1 PE=4 SV=1 - [E9PFS5_HUMAN]   |
| F5H223 | Uncharacterized protein OS=Homo sapiens GN=DCTN2 PE=4 SV=1 - [F5H223_HUMAN]   |
| E7EWW8 | Uncharacterized protein OS=Homo sapiens GN=DCTN5 PE=4 SV=1 - [E7EWW8_HUMAN]   |
| C9J8R4 | Uncharacterized protein OS=Homo sapiens GN=DCUN1D1 PE=4 SV=1 - [C9J8R4_HUMAN] |
| B4DME8 | Uncharacterized protein OS=Homo sapiens GN=DDX1 PE=2 SV=1 - [B4DME8_HUMAN]    |
| D6RCM4 | Uncharacterized protein OS=Homo sapiens GN=DDX4 PE=3 SV=1 - [D6RCM4_HUMAN]    |
| D6RDA2 | Uncharacterized protein OS=Homo sapiens GN=DEK PE=4 SV=1 - [D6RDA2_HUMAN]     |
| E9PML7 | Uncharacterized protein OS=Homo sapiens GN=DERA PE=4 SV=1 - [E9PML7_HUMAN]    |
| F5H6K0 | Uncharacterized protein OS=Homo sapiens GN=DHX15 PE=4 SV=1 - [F5H6K0_HUMAN]   |
| E7ERW8 | Uncharacterized protein OS=Homo sapiens GN=DIAPH1 PE=4 SV=1 - [E7ERW8_HUMAN]  |
| E7EPJ5 | Uncharacterized protein OS=Homo sapiens GN=DNAH11 PE=4 SV=1 - [E7EPJ5_HUMAN]  |

|        |                                                                               |
|--------|-------------------------------------------------------------------------------|
| E7EUM8 | Uncharacterized protein OS=Homo sapiens GN=DNAH17 PE=4 SV=1 - [E7EUM8_HUMAN]  |
| E7EP17 | Uncharacterized protein OS=Homo sapiens GN=DNAH9 PE=4 SV=1 - [E7EP17_HUMAN]   |
| C9JXB9 | Uncharacterized protein OS=Homo sapiens GN=DNAJB2 PE=4 SV=1 - [C9JXB9_HUMAN]  |
| C9JUL4 | Uncharacterized protein OS=Homo sapiens GN=DNAJB4 PE=4 SV=1 - [C9JUL4_HUMAN]  |
| E7EPX3 | Uncharacterized protein OS=Homo sapiens GN=DNPEP PE=3 SV=1 - [E7EPX3_HUMAN]   |
| E7EPS3 | Uncharacterized protein OS=Homo sapiens GN=DPH5 PE=4 SV=1 - [E7EPS3_HUMAN]    |
| F5GXD5 | Uncharacterized protein OS=Homo sapiens GN=DPP3 PE=4 SV=1 - [F5GXD5_HUMAN]    |
| B4DR31 | Uncharacterized protein OS=Homo sapiens GN=DPYSL2 PE=2 SV=1 - [B4DR31_HUMAN]  |
| E7ERU0 | Uncharacterized protein OS=Homo sapiens GN=DST PE=4 SV=1 - [E7ERU0_HUMAN]     |
| B4DE23 | Uncharacterized protein OS=Homo sapiens GN=EHD2 PE=2 SV=1 - [B4DE23_HUMAN]    |
| B4DF96 | Uncharacterized protein OS=Homo sapiens GN=EIF2A PE=2 SV=1 - [B4DF96_HUMAN]   |
| F5H0D0 | Uncharacterized protein OS=Homo sapiens GN=EIF2B1 PE=3 SV=1 - [F5H0D0_HUMAN]  |
| F5H6W1 | Uncharacterized protein OS=Homo sapiens GN=EIF2B4 PE=3 SV=1 - [F5H6W1_HUMAN]  |
| E9PC74 | Uncharacterized protein OS=Homo sapiens GN=EIF2B5 PE=4 SV=1 - [E9PC74_HUMAN]  |
| F5H335 | Uncharacterized protein OS=Homo sapiens GN=EIF3A PE=4 SV=1 - [F5H335_HUMAN]   |
| B4DV79 | Uncharacterized protein OS=Homo sapiens GN=EIF3B PE=2 SV=1 - [B4DV79_HUMAN]   |
| F5H1I1 | Uncharacterized protein OS=Homo sapiens GN=EIF3C PE=4 SV=1 - [F5H1I1_HUMAN]   |
| E5RHC7 | Uncharacterized protein OS=Homo sapiens GN=EIF3H PE=4 SV=1 - [E5RHC7_HUMAN]   |
| B7ZAM9 | Uncharacterized protein OS=Homo sapiens GN=EIF3K PE=2 SV=1 - [B7ZAM9_HUMAN]   |
| E9PN86 | Uncharacterized protein OS=Homo sapiens GN=EIF3M PE=4 SV=1 - [E9PN86_HUMAN]   |
| E7EQG2 | Uncharacterized protein OS=Homo sapiens GN=EIF4A2 PE=3 SV=1 - [E7EQG2_HUMAN]  |
| E7EPC9 | Uncharacterized protein OS=Homo sapiens GN=EIF4B PE=4 SV=1 - [E7EPC9_HUMAN]   |
| E7EX73 | Uncharacterized protein OS=Homo sapiens GN=EIF4G1 PE=4 SV=1 - [E7EX73_HUMAN]  |
| B7Z8R4 | Uncharacterized protein OS=Homo sapiens GN=ELF2 PE=2 SV=1 - [B7Z8R4_HUMAN]    |
| D6RA00 | Uncharacterized protein OS=Homo sapiens GN=ENOPH1 PE=4 SV=1 - [D6RA00_HUMAN]  |
| F5H1W8 | Uncharacterized protein OS=Homo sapiens GN=ENOSF1 PE=4 SV=1 - [F5H1W8_HUMAN]  |
| E9PEX0 | Uncharacterized protein OS=Homo sapiens GN=EPB41 PE=4 SV=1 - [E9PEX0_HUMAN]   |
| F5H563 | Uncharacterized protein OS=Homo sapiens GN=EPB42 PE=4 SV=1 - [F5H563_HUMAN]   |
| E5RJ56 | Uncharacterized protein OS=Homo sapiens GN=EPB49 PE=4 SV=1 - [E5RJ56_HUMAN]   |
| F2Z3A2 | Uncharacterized protein OS=Homo sapiens GN=ERGIC1 PE=4 SV=1 - [F2Z3A2_HUMAN]  |
| B4DT43 | Uncharacterized protein OS=Homo sapiens GN=ETFA PE=2 SV=1 - [B4DT43_HUMAN]    |
| E7ESD5 | Uncharacterized protein OS=Homo sapiens GN=EYA4 PE=4 SV=1 - [E7ESD5_HUMAN]    |
| E7EQR4 | Uncharacterized protein OS=Homo sapiens GN=EZR PE=4 SV=2 - [E7EQR4_HUMAN]     |
| B4DEJ6 | Uncharacterized protein OS=Homo sapiens GN=FAF1 PE=2 SV=1 - [B4DEJ6_HUMAN]    |
| E9PBZ4 | Uncharacterized protein OS=Homo sapiens GN=FAM173B PE=4 SV=1 - [E9PBZ4_HUMAN] |
| F5GYN0 | Uncharacterized protein OS=Homo sapiens GN=FAM186A PE=4 SV=1 - [F5GYN0_HUMAN] |
| B4DZ15 | Uncharacterized protein OS=Homo sapiens GN=FAM186B PE=2 SV=1 - [B4DZ15_HUMAN] |
| B4E363 | Uncharacterized protein OS=Homo sapiens GN=FARSA PE=2 SV=1 - [B4E363_HUMAN]   |
| E9PCI9 | Uncharacterized protein OS=Homo sapiens GN=FDPS PE=3 SV=1 - [E9PCI9_HUMAN]    |
| F5H1C6 | Uncharacterized protein OS=Homo sapiens GN=FERMT3 PE=4 SV=1 - [F5H1C6_HUMAN]  |
| B7Z7Z8 | Uncharacterized protein OS=Homo sapiens GN=FKBP5 PE=2 SV=1 - [B7Z7Z8_HUMAN]   |
| E7EN95 | Uncharacterized protein OS=Homo sapiens GN=FLNB PE=4 SV=1 - [E7EN95_HUMAN]    |
| F5H0J2 | Uncharacterized protein OS=Homo sapiens GN=FMNL1 PE=4 SV=1 - [F5H0J2_HUMAN]   |

|        |                                                                                |
|--------|--------------------------------------------------------------------------------|
| A8MQB8 | Uncharacterized protein OS=Homo sapiens GN=FMR1 PE=4 SV=1 - [A8MQB8_HUMAN]     |
| B3KNR9 | Uncharacterized protein OS=Homo sapiens GN=FN3K PE=2 SV=1 - [B3KNR9_HUMAN]     |
| C9JCN8 | Uncharacterized protein OS=Homo sapiens GN=FOSL2 PE=3 SV=1 - [C9JCN8_HUMAN]    |
| F5H7C9 | Uncharacterized protein OS=Homo sapiens GN=FOXO3 PE=4 SV=1 - [F5H7C9_HUMAN]    |
| B4E0X8 | Uncharacterized protein OS=Homo sapiens GN=FUBP1 PE=2 SV=1 - [B4E0X8_HUMAN]    |
| F5H4D6 | Uncharacterized protein OS=Homo sapiens GN=G3BP1 PE=4 SV=1 - [F5H4D6_HUMAN]    |
| E9PGM4 | Uncharacterized protein OS=Homo sapiens GN=GBE1 PE=4 SV=1 - [E9PGM4_HUMAN]     |
| B4E192 | Uncharacterized protein OS=Homo sapiens GN=GFAP PE=2 SV=1 - [B4E192_HUMAN]     |
| B8ZZK2 | Uncharacterized protein OS=Homo sapiens GN=GGCT PE=4 SV=1 - [B8ZZK2_HUMAN]     |
| E7ESB6 | Uncharacterized protein OS=Homo sapiens GN=GIGYF2 PE=4 SV=1 - [E7ESB6_HUMAN]   |
| E7EMY5 | Uncharacterized protein OS=Homo sapiens GN=GLOD4 PE=4 SV=1 - [E7EMY5_HUMAN]    |
| C9JAH0 | Uncharacterized protein OS=Homo sapiens GN=GMPPA PE=4 SV=1 - [C9JAH0_HUMAN]    |
| B4DUT7 | Uncharacterized protein OS=Homo sapiens GN=GMPS PE=2 SV=1 - [B4DUT7_HUMAN]     |
| E9PHP0 | Uncharacterized protein OS=Homo sapiens GN=GNL1 PE=4 SV=1 - [E9PHP0_HUMAN]     |
| D6R917 | Uncharacterized protein OS=Homo sapiens GN=GNPDA1 PE=4 SV=1 - [D6R917_HUMAN]   |
| E9PDI1 | Uncharacterized protein OS=Homo sapiens GN=GPCPD1 PE=4 SV=1 - [E9PDI1_HUMAN]   |
| F5H504 | Uncharacterized protein OS=Homo sapiens GN=GRIPAP1 PE=4 SV=1 - [F5H504_HUMAN]  |
| F5H8M4 | Uncharacterized protein OS=Homo sapiens GN=GSN PE=4 SV=1 - [F5H8M4_HUMAN]      |
| E7EQZ3 | Uncharacterized protein OS=Homo sapiens GN=GSPT1 PE=4 SV=1 - [E7EQZ3_HUMAN]    |
| E9PLF1 | Uncharacterized protein OS=Homo sapiens GN=GSTM2 PE=4 SV=1 - [E9PLF1_HUMAN]    |
| A8MX94 | Uncharacterized protein OS=Homo sapiens GN=GSTP1 PE=3 SV=1 - [A8MX94_HUMAN]    |
| C9JA47 | Uncharacterized protein OS=Homo sapiens GN=GSTT1 PE=4 SV=1 - [C9JA47_HUMAN]    |
| C9J8R8 | Uncharacterized protein OS=Homo sapiens GN=GYG1 PE=4 SV=1 - [C9J8R8_HUMAN]     |
| E9PIZ2 | Uncharacterized protein OS=Homo sapiens GN=GYLTL1B PE=4 SV=1 - [E9PIZ2_HUMAN]  |
| B4DF58 | Uncharacterized protein OS=Homo sapiens GN=GZF1 PE=2 SV=1 - [B4DF58_HUMAN]     |
| F5H5M6 | Uncharacterized protein OS=Homo sapiens GN=HABP2 PE=3 SV=1 - [F5H5M6_HUMAN]    |
| D6RF05 | Uncharacterized protein OS=Homo sapiens GN=HARS PE=4 SV=1 - [D6RF05_HUMAN]     |
| E9PC78 | Uncharacterized protein OS=Homo sapiens GN=HAS1 PE=4 SV=1 - [E9PC78_HUMAN]     |
| B4DQ69 | Uncharacterized protein OS=Homo sapiens GN=HCLS1 PE=2 SV=1 - [B4DQ69_HUMAN]    |
| E5RK19 | Uncharacterized protein OS=Homo sapiens GN=HDAC2 PE=4 SV=1 - [E5RK19_HUMAN]    |
| F5GZ06 | Uncharacterized protein OS=Homo sapiens GN=HEATR7B2 PE=4 SV=1 - [F5GZ06_HUMAN] |
| F5H5Y5 | Uncharacterized protein OS=Homo sapiens GN=HGS PE=4 SV=1 - [F5H5Y5_HUMAN]      |
| E9PCK0 | Uncharacterized protein OS=Homo sapiens GN=HK1 PE=3 SV=1 - [E9PCK0_HUMAN]      |
| F5H345 | Uncharacterized protein OS=Homo sapiens GN=HMBS PE=4 SV=1 - [F5H345_HUMAN]     |
| F5H4N1 | Uncharacterized protein OS=Homo sapiens GN=HMHA1 PE=4 SV=1 - [F5H4N1_HUMAN]    |
| B8ZZT7 | Uncharacterized protein OS=Homo sapiens GN=HN1 PE=4 SV=1 - [B8ZZT7_HUMAN]      |
| B4DL85 | Uncharacterized protein OS=Homo sapiens GN=HN1L PE=2 SV=1 - [B4DL85_HUMAN]     |
| E7EWI9 | Uncharacterized protein OS=Homo sapiens GN=HNRNPA3 PE=4 SV=1 - [E7EWI9_HUMAN]  |
| D6R9P3 | Uncharacterized protein OS=Homo sapiens GN=HNRNPAB PE=4 SV=1 - [D6R9P3_HUMAN]  |
| B4DTC3 | Uncharacterized protein OS=Homo sapiens GN=HNRNPD PE=2 SV=1 - [B4DTC3_HUMAN]   |
| B4DKS8 | Uncharacterized protein OS=Homo sapiens GN=HNRNPF PE=2 SV=1 - [B4DKS8_HUMAN]   |
| B4DFK9 | Uncharacterized protein OS=Homo sapiens GN=HNRNPH2 PE=2 SV=1 - [B4DFK9_HUMAN]  |
| B4DPK8 | Uncharacterized protein OS=Homo sapiens GN=HNRNPL PE=2 SV=1 - [B4DPK8_HUMAN]   |

|        |                                                                                |
|--------|--------------------------------------------------------------------------------|
| B3KX72 | Uncharacterized protein OS=Homo sapiens GN=HNRNPU PE=2 SV=1 - [B3KX72_HUMAN]   |
| E9PAZ1 | Uncharacterized protein OS=Homo sapiens GN=HOMER2 PE=4 SV=1 - [E9PAZ1_HUMAN]   |
| E5RIP8 | Uncharacterized protein OS=Homo sapiens GN=HRSP12 PE=4 SV=1 - [E5RIP8_HUMAN]   |
| E9PDE8 | Uncharacterized protein OS=Homo sapiens GN=HSPA4L PE=3 SV=1 - [E9PDE8_HUMAN]   |
| B4DL87 | Uncharacterized protein OS=Homo sapiens GN=HSPB1 PE=2 SV=1 - [B4DL87_HUMAN]    |
| E7EXB4 | Uncharacterized protein OS=Homo sapiens GN=HSPD1 PE=3 SV=1 - [E7EXB4_HUMAN]    |
| E9PD66 | Uncharacterized protein OS=Homo sapiens GN=HUWE1 PE=4 SV=1 - [E9PD66_HUMAN]    |
| E9PDR5 | Uncharacterized protein OS=Homo sapiens GN=IBTK PE=4 SV=1 - [E9PDR5_HUMAN]     |
| E7EP25 | Uncharacterized protein OS=Homo sapiens GN=IFT172 PE=4 SV=1 - [E7EP25_HUMAN]   |
| D6RGV7 | Uncharacterized protein OS=Homo sapiens GN=IGSF22 PE=4 SV=1 - [D6RGV7_HUMAN]   |
| B4DFG4 | Uncharacterized protein OS=Homo sapiens GN=ILF3 PE=2 SV=1 - [B4DFG4_HUMAN]     |
| C9J406 | Uncharacterized protein OS=Homo sapiens GN=IMMT PE=4 SV=1 - [C9J406_HUMAN]     |
| E7EMB7 | Uncharacterized protein OS=Homo sapiens GN=IPO11 PE=4 SV=1 - [E7EMB7_HUMAN]    |
| B4E0R6 | Uncharacterized protein OS=Homo sapiens GN=IPO5 PE=2 SV=1 - [B4E0R6_HUMAN]     |
| C9JL81 | Uncharacterized protein OS=Homo sapiens GN=IQCD PE=4 SV=1 - [C9JL81_HUMAN]     |
| E7EWZ6 | Uncharacterized protein OS=Homo sapiens GN=ITGAV PE=3 SV=1 - [E7EWZ6_HUMAN]    |
| Q6ZW95 | Uncharacterized protein OS=Homo sapiens GN=KCNK2 PE=2 SV=1 - [Q6ZW95_HUMAN]    |
| F5GX28 | Uncharacterized protein OS=Homo sapiens GN=KDM4B PE=4 SV=1 - [F5GX28_HUMAN]    |
| E7ET98 | Uncharacterized protein OS=Homo sapiens GN=KHDRBS1 PE=4 SV=2 - [E7ET98_HUMAN]  |
| E7EP96 | Uncharacterized protein OS=Homo sapiens GN=KHSRP PE=4 SV=1 - [E7EP96_HUMAN]    |
| F5H6Z7 | Uncharacterized protein OS=Homo sapiens GN=KIAA0174 PE=4 SV=1 - [F5H6Z7_HUMAN] |
| E7EQI7 | Uncharacterized protein OS=Homo sapiens GN=KIAA0196 PE=4 SV=1 - [E7EQI7_HUMAN] |
| E9PEZ5 | Uncharacterized protein OS=Homo sapiens GN=KIAA1107 PE=4 SV=1 - [E9PEZ5_HUMAN] |
| C9J352 | Uncharacterized protein OS=Homo sapiens GN=KPNA1 PE=4 SV=1 - [C9J352_HUMAN]    |
| E9PCN9 | Uncharacterized protein OS=Homo sapiens GN=KPNA3 PE=4 SV=1 - [E9PCN9_HUMAN]    |
| F5H4G7 | Uncharacterized protein OS=Homo sapiens GN=KPNA6 PE=4 SV=1 - [F5H4G7_HUMAN]    |
| F5H6G5 | Uncharacterized protein OS=Homo sapiens GN=KRT6B PE=3 SV=1 - [F5H6G5_HUMAN]    |
| C9JVN9 | Uncharacterized protein OS=Homo sapiens GN=L2HGDH PE=4 SV=1 - [C9JVN9_HUMAN]   |
| A6NGS5 | Uncharacterized protein OS=Homo sapiens GN=LAMA2 PE=4 SV=2 - [A6NGS5_HUMAN]    |
| E9PHS0 | Uncharacterized protein OS=Homo sapiens GN=LANCL1 PE=4 SV=1 - [E9PHS0_HUMAN]   |
| B4DJ10 | Uncharacterized protein OS=Homo sapiens GN=LARS PE=2 SV=1 - [B4DJ10_HUMAN]     |
| F5GY62 | Uncharacterized protein OS=Homo sapiens GN=LIMCH1 PE=4 SV=1 - [F5GY62_HUMAN]   |
| F5GX84 | Uncharacterized protein OS=Homo sapiens GN=LMCD1 PE=4 SV=1 - [F5GX84_HUMAN]    |
| E9PBF6 | Uncharacterized protein OS=Homo sapiens GN=LMNB1 PE=3 SV=1 - [E9PBF6_HUMAN]    |
| F5H2T1 | Uncharacterized protein OS=Homo sapiens GN=LRCH2 PE=4 SV=1 - [F5H2T1_HUMAN]    |
| B4DS68 | Uncharacterized protein OS=Homo sapiens GN=LRP11 PE=2 SV=1 - [B4DS68_HUMAN]    |
| E5RJ48 | Uncharacterized protein OS=Homo sapiens GN=LYPLA1 PE=4 SV=1 - [E5RJ48_HUMAN]   |
| F5GWL8 | Uncharacterized protein OS=Homo sapiens GN=LZTFL1 PE=4 SV=1 - [F5GWL8_HUMAN]   |
| F5GXU8 | Uncharacterized protein OS=Homo sapiens GN=LZTR1 PE=4 SV=1 - [F5GXU8_HUMAN]    |
| C9JIR0 | Uncharacterized protein OS=Homo sapiens GN=MAD1L1 PE=4 SV=1 - [C9JIR0_HUMAN]   |
| F5H3U9 | Uncharacterized protein OS=Homo sapiens GN=MAGOHB PE=4 SV=1 - [F5H3U9_HUMAN]   |
| B4DH44 | Uncharacterized protein OS=Homo sapiens GN=MAP2K4 PE=2 SV=1 - [B4DH44_HUMAN]   |
| B7Z895 | Uncharacterized protein OS=Homo sapiens GN=MAP7D2 PE=2 SV=1 - [B7Z895_HUMAN]   |

|        |                                                                                |
|--------|--------------------------------------------------------------------------------|
| D6REN1 | Uncharacterized protein OS=Homo sapiens GN=MARCH1 PE=4 SV=1 - [D6REN1_HUMAN]   |
| A8MUU4 | Uncharacterized protein OS=Homo sapiens GN=MBP PE=4 SV=2 - [A8MUU4_HUMAN]      |
| D6REY2 | Uncharacterized protein OS=Homo sapiens GN=MCC PE=4 SV=1 - [D6REY2_HUMAN]      |
| C9J600 | Uncharacterized protein OS=Homo sapiens GN=MCM10 PE=4 SV=1 - [C9J600_HUMAN]    |
| E5RK04 | Uncharacterized protein OS=Homo sapiens GN=MCM4 PE=4 SV=1 - [E5RK04_HUMAN]     |
| E5RJR1 | Uncharacterized protein OS=Homo sapiens GN=MCTP1 PE=4 SV=1 - [E5RJR1_HUMAN]    |
| F5H3Y1 | Uncharacterized protein OS=Homo sapiens GN=MED12 PE=4 SV=1 - [F5H3Y1_HUMAN]    |
| E7EQ94 | Uncharacterized protein OS=Homo sapiens GN=MET PE=4 SV=2 - [E7EQ94_HUMAN]      |
| E9PGF9 | Uncharacterized protein OS=Homo sapiens GN=MGEA5 PE=4 SV=1 - [E9PGF9_HUMAN]    |
| C9JLN4 | Uncharacterized protein OS=Homo sapiens GN=MICAL1 PE=4 SV=1 - [C9JLN4_HUMAN]   |
| B7Z849 | Uncharacterized protein OS=Homo sapiens GN=MICAL2 PE=2 SV=1 - [B7Z849_HUMAN]   |
| F5H4V4 | Uncharacterized protein OS=Homo sapiens GN=MKI67 PE=4 SV=1 - [F5H4V4_HUMAN]    |
| D6RCK3 | Uncharacterized protein OS=Homo sapiens GN=MOBK1A PE=4 SV=1 - [D6RCK3_HUMAN]   |
| F5H8H9 | Uncharacterized protein OS=Homo sapiens GN=MPHOSPH8 PE=4 SV=1 - [F5H8H9_HUMAN] |
| F5H2F9 | Uncharacterized protein OS=Homo sapiens GN=MSH6 PE=3 SV=1 - [F5H2F9_HUMAN]     |
| E9PMQ0 | Uncharacterized protein OS=Homo sapiens GN=MYB PE=4 SV=1 - [E9PMQ0_HUMAN]      |
| B4DRZ1 | Uncharacterized protein OS=Homo sapiens GN=MYCN PE=2 SV=1 - [B4DRZ1_HUMAN]     |
| F5GWY8 | Uncharacterized protein OS=Homo sapiens GN=MYO1A PE=4 SV=1 - [F5GWY8_HUMAN]    |
| F5H7I9 | Uncharacterized protein OS=Homo sapiens GN=MYPN PE=4 SV=1 - [F5H7I9_HUMAN]     |
| F2Z2Y6 | Uncharacterized protein OS=Homo sapiens GN=NAA38 PE=4 SV=1 - [F2Z2Y6_HUMAN]    |
| E7EQ69 | Uncharacterized protein OS=Homo sapiens GN=NAA50 PE=4 SV=1 - [E7EQ69_HUMAN]    |
| A8MU28 | Uncharacterized protein OS=Homo sapiens GN=NAE1 PE=4 SV=1 - [A8MU28_HUMAN]     |
| F5H1X5 | Uncharacterized protein OS=Homo sapiens GN=NAP1L1 PE=3 SV=1 - [F5H1X5_HUMAN]   |
| C9JZI7 | Uncharacterized protein OS=Homo sapiens GN=NAP1L4 PE=3 SV=1 - [C9JZI7_HUMAN]   |
| E7EPF5 | Uncharacterized protein OS=Homo sapiens GN=NCK2 PE=4 SV=1 - [E7EPF5_HUMAN]     |
| Q6ZS38 | Uncharacterized protein OS=Homo sapiens GN=NDUFS7 PE=2 SV=1 - [Q6ZS38_HUMAN]   |
| D6RBG5 | Uncharacterized protein OS=Homo sapiens GN=NEK1 PE=4 SV=1 - [D6RBG5_HUMAN]     |
| B4DZU0 | Uncharacterized protein OS=Homo sapiens GN=NEK2 PE=2 SV=1 - [B4DZU0_HUMAN]     |
| C9JFL6 | Uncharacterized protein OS=Homo sapiens GN=NFE2L2 PE=4 SV=1 - [C9JFL6_HUMAN]   |
| D6RF93 | Uncharacterized protein OS=Homo sapiens GN=NFKB1 PE=4 SV=1 - [D6RF93_HUMAN]    |
| B5MDB6 | Uncharacterized protein OS=Homo sapiens GN=NLRC3 PE=4 SV=2 - [B5MDB6_HUMAN]    |
| A6NJK7 | Uncharacterized protein OS=Homo sapiens GN=NOL8 PE=4 SV=2 - [A6NJK7_HUMAN]     |
| E9PN47 | Uncharacterized protein OS=Homo sapiens GN=NPEPL1 PE=4 SV=1 - [E9PN47_HUMAN]   |
| B7Z463 | Uncharacterized protein OS=Homo sapiens GN=NPEPPS PE=2 SV=1 - [B7Z463_HUMAN]   |
| B4DG89 | Uncharacterized protein OS=Homo sapiens GN=NPLOC4 PE=2 SV=1 - [B4DG89_HUMAN]   |
| B4E2P3 | Uncharacterized protein OS=Homo sapiens GN=NR5A2 PE=2 SV=1 - [B4E2P3_HUMAN]    |
| E9PR11 | Uncharacterized protein OS=Homo sapiens GN=NRBP2 PE=4 SV=1 - [E9PR11_HUMAN]    |
| B9A035 | Uncharacterized protein OS=Homo sapiens GN=NT5C3 PE=4 SV=1 - [B9A035_HUMAN]    |
| E5RHQ3 | Uncharacterized protein OS=Homo sapiens GN=NUDCD1 PE=4 SV=1 - [E5RHQ3_HUMAN]   |
| E5RFP0 | Uncharacterized protein OS=Homo sapiens GN=NUDCD2 PE=4 SV=1 - [E5RFP0_HUMAN]   |
| F5H2E3 | Uncharacterized protein OS=Homo sapiens GN=OPHN1 PE=4 SV=1 - [F5H2E3_HUMAN]    |
| F5GYN4 | Uncharacterized protein OS=Homo sapiens GN=OTUB1 PE=4 SV=1 - [F5GYN4_HUMAN]    |
| B4DUA5 | Uncharacterized protein OS=Homo sapiens GN=P4HB PE=2 SV=1 - [B4DUA5_HUMAN]     |

|               |                                                                                    |
|---------------|------------------------------------------------------------------------------------|
| E7EQV3        | Uncharacterized protein OS=Homo sapiens GN=PABPC1 PE=4 SV=1 - [E7EQV3_HUMAN]       |
| E9PBS1        | Uncharacterized protein OS=Homo sapiens GN=PAICS PE=4 SV=1 - [E9PBS1_HUMAN]        |
| E9PHT6        | Uncharacterized protein OS=Homo sapiens GN=PANK4 PE=4 SV=1 - [E9PHT6_HUMAN]        |
| B4DV82        | Uncharacterized protein OS=Homo sapiens GN=PARP2 PE=2 SV=1 - [B4DV82_HUMAN]        |
| E5RGG7        | Uncharacterized protein OS=Homo sapiens GN=PCMTD1 PE=3 SV=1 - [E5RGG7_HUMAN]       |
| E9PQD8        | Uncharacterized protein OS=Homo sapiens GN=PDDC1 PE=4 SV=1 - [E9PQD8_HUMAN]        |
| F6T1Q0        | Uncharacterized protein OS=Homo sapiens GN=PDE12 PE=4 SV=1 - [F6T1Q0_HUMAN]        |
| E9PJ64        | Uncharacterized protein OS=Homo sapiens GN=PDE4DIP PE=4 SV=1 - [E9PJ64_HUMAN]      |
| B3KQU2        | Uncharacterized protein OS=Homo sapiens GN=PDIA2 PE=2 SV=1 - [B3KQU2_HUMAN]        |
| B3KQT9        | Uncharacterized protein OS=Homo sapiens GN=PDIA3 PE=2 SV=1 - [B3KQT9_HUMAN]        |
| F2Z2Y4        | Uncharacterized protein OS=Homo sapiens GN=PD XK PE=4 SV=1 - [F2Z2Y4_HUMAN]        |
| E9PCE8        | Uncharacterized protein OS=Homo sapiens GN=PEPD PE=3 SV=1 - [E9PCE8_HUMAN]         |
| E9PN05        | Uncharacterized protein OS=Homo sapiens GN=PICALM PE=4 SV=1 - [E9PN05_HUMAN]       |
| F2Z3N1        | Uncharacterized protein OS=Homo sapiens GN=PIP5K1B PE=4 SV=2 - [F2Z3N1_HUMAN]      |
| F5GWE5        | Uncharacterized protein OS=Homo sapiens GN=PITPNA PE=4 SV=1 - [F5GWE5_HUMAN]       |
| E7EU42        | Uncharacterized protein OS=Homo sapiens GN=PLA2G4A PE=4 SV=1 - [E7EU42_HUMAN]      |
| E5RIM3        | Uncharacterized protein OS=Homo sapiens GN=PLAA PE=4 SV=1 - [E5RIM3_HUMAN]         |
| B7Z6M1        | Uncharacterized protein OS=Homo sapiens GN=PLS3 PE=2 SV=1 - [B7Z6M1_HUMAN]         |
| B4E0V0        | Uncharacterized protein OS=Homo sapiens GN=PNPO PE=2 SV=1 - [B4E0V0_HUMAN]         |
| F5H696        | Uncharacterized protein OS=Homo sapiens GN=POLQ PE=4 SV=1 - [F5H696_HUMAN]         |
| A6NM32        | Uncharacterized protein OS=Homo sapiens GN=PPIH PE=3 SV=1 - [A6NM32_HUMAN]         |
| B8ZZ77        | Uncharacterized protein OS=Homo sapiens GN=PPIL3 PE=3 SV=1 - [B8ZZ77_HUMAN]        |
| A8MYH2        | Uncharacterized protein OS=Homo sapiens GN=PPIP5K1 PE=4 SV=1 - [A8MYH2_HUMAN]      |
| D6RFZ8        | Uncharacterized protein OS=Homo sapiens GN=PPIP5K2 PE=4 SV=1 - [D6RFZ8_HUMAN]      |
| F5GYS1        | Uncharacterized protein OS=Homo sapiens GN=PPP2R5D PE=4 SV=1 - [F5GYS1_HUMAN]      |
| B4DLT9        | Uncharacterized protein OS=Homo sapiens GN=PPP6R1 PE=2 SV=1 - [B4DLT9_HUMAN]       |
| E9PH29        | Uncharacterized protein OS=Homo sapiens GN=PRDX3 PE=4 SV=1 - [E9PH29_HUMAN]        |
| E9PBE1        | Uncharacterized protein OS=Homo sapiens GN=PRKCZ PE=4 SV=1 - [E9PBE1_HUMAN]        |
| E7EPE6        | Uncharacterized protein OS=Homo sapiens GN=PRKG2 PE=4 SV=1 - [E7EPE6_HUMAN]        |
| E9PNE8        | Uncharacterized protein OS=Homo sapiens GN=PRPH PE=3 SV=1 - [E9PNE8_HUMAN]         |
| C9J168        | Uncharacterized protein OS=Homo sapiens GN=PRPSAP1 PE=4 SV=1 - [C9J168_HUMAN]      |
| E7EPA1        | Uncharacterized protein OS=Homo sapiens GN=PRPSAP2 PE=4 SV=1 - [E7EPA1_HUMAN]      |
| F5GX11        | Uncharacterized protein OS=Homo sapiens GN=PSMA1 PE=4 SV=1 - [F5GX11_HUMAN]        |
| F5GZ16        | Uncharacterized protein OS=Homo sapiens GN=PSMD2 PE=4 SV=1 - [F5GZ16_HUMAN]        |
| <i>F5H8K4</i> | <i>Uncharacterized protein OS=Homo sapiens GN=PSMD3 PE=4 SV=1 - [F5H8K4_HUMAN]</i> |
| E9PHI9        | Uncharacterized protein OS=Homo sapiens GN=PSMD6 PE=4 SV=1 - [E9PHI9_HUMAN]        |
| <i>B4DXI8</i> | <i>Uncharacterized protein OS=Homo sapiens GN=PSMD7 PE=2 SV=1 - [B4DXI8_HUMAN]</i> |
| F5H4W8        | Uncharacterized protein OS=Homo sapiens GN=PSMG2 PE=4 SV=1 - [F5H4W8_HUMAN]        |
| B8ZZQ6        | Uncharacterized protein OS=Homo sapiens GN=PTMA PE=4 SV=1 - [B8ZZQ6_HUMAN]         |
| B4DX06        | Uncharacterized protein OS=Homo sapiens GN=PTPN7 PE=2 SV=1 - [B4DX06_HUMAN]        |
| B4DNN3        | Uncharacterized protein OS=Homo sapiens GN=QARS PE=2 SV=1 - [B4DNN3_HUMAN]         |
| E7EX40        | Uncharacterized protein OS=Homo sapiens GN=RAB11FIP1 PE=4 SV=1 - [E7EX40_HUMAN]    |
| C9J7D1        | Uncharacterized protein OS=Homo sapiens GN=RAB7A PE=4 SV=1 - [C9J7D1_HUMAN]        |

|        |                                                                                |
|--------|--------------------------------------------------------------------------------|
| B4DHR0 | Uncharacterized protein OS=Homo sapiens GN=RABEP2 PE=2 SV=1 - [B4DHR0_HUMAN]   |
| F5H4C2 | Uncharacterized protein OS=Homo sapiens GN=RANBP3 PE=4 SV=1 - [F5H4C2_HUMAN]   |
| B4DW94 | Uncharacterized protein OS=Homo sapiens GN=RAP1B PE=2 SV=1 - [B4DW94_HUMAN]    |
| E9PGY3 | Uncharacterized protein OS=Homo sapiens GN=RAPGEF5 PE=4 SV=1 - [E9PGY3_HUMAN]  |
| F5H3T8 | Uncharacterized protein OS=Homo sapiens GN=RARS PE=4 SV=1 - [F5H3T8_HUMAN]     |
| E9PC52 | Uncharacterized protein OS=Homo sapiens GN=RBBP7 PE=4 SV=1 - [E9PC52_HUMAN]    |
| E9PSF1 | Uncharacterized protein OS=Homo sapiens GN=RBM38 PE=4 SV=1 - [E9PSF1_HUMAN]    |
| B4DNY1 | Uncharacterized protein OS=Homo sapiens GN=RBM6 PE=2 SV=1 - [B4DNY1_HUMAN]     |
| F5GX07 | Uncharacterized protein OS=Homo sapiens GN=REXO2 PE=4 SV=1 - [F5GX07_HUMAN]    |
| D6RJG8 | Uncharacterized protein OS=Homo sapiens GN=RFESD PE=4 SV=1 - [D6RJG8_HUMAN]    |
| E7ETT0 | Uncharacterized protein OS=Homo sapiens GN=RICTOR PE=4 SV=1 - [E7ETT0_HUMAN]   |
| E9PCZ1 | Uncharacterized protein OS=Homo sapiens GN=RIMS1 PE=4 SV=1 - [E9PCZ1_HUMAN]    |
| F6V054 | Uncharacterized protein OS=Homo sapiens GN=RIN3 PE=4 SV=1 - [F6V054_HUMAN]     |
| E7EP22 | Uncharacterized protein OS=Homo sapiens GN=RNFB14 PE=4 SV=1 - [E7EP22_HUMAN]   |
| F6SYU7 | Uncharacterized protein OS=Homo sapiens GN=RNFB40 PE=4 SV=1 - [F6SYU7_HUMAN]   |
| A6NKB8 | Uncharacterized protein OS=Homo sapiens GN=RNPEP PE=4 SV=1 - [A6NKB8_HUMAN]    |
| E9PF63 | Uncharacterized protein OS=Homo sapiens GN=ROCK2 PE=4 SV=1 - [E9PF63_HUMAN]    |
| C9J6A7 | Uncharacterized protein OS=Homo sapiens GN=RPE PE=4 SV=1 - [C9J6A7_HUMAN]      |
| E7EPB3 | Uncharacterized protein OS=Homo sapiens GN=RPL14 PE=4 SV=1 - [E7EPB3_HUMAN]    |
| B4DM74 | Uncharacterized protein OS=Homo sapiens GN=RPL18A PE=2 SV=1 - [B4DM74_HUMAN]   |
| E5RIT6 | Uncharacterized protein OS=Homo sapiens GN=RPL26L1 PE=3 SV=1 - [E5RIT6_HUMAN]  |
| F2Z3A5 | Uncharacterized protein OS=Homo sapiens GN=RPL3 PE=3 SV=1 - [F2Z3A5_HUMAN]     |
| B8ZZK4 | Uncharacterized protein OS=Homo sapiens GN=RPL31 PE=4 SV=1 - [B8ZZK4_HUMAN]    |
| E7EWF1 | Uncharacterized protein OS=Homo sapiens GN=RPL4 PE=4 SV=1 - [E7EWF1_HUMAN]     |
| E9PKZ0 | Uncharacterized protein OS=Homo sapiens GN=RPL8 PE=4 SV=1 - [E9PKZ0_HUMAN]     |
| B4E1M5 | Uncharacterized protein OS=Homo sapiens GN=RPL9 PE=2 SV=1 - [B4E1M5_HUMAN]     |
| E9PS50 | Uncharacterized protein OS=Homo sapiens GN=RPS13 PE=4 SV=1 - [E9PS50_HUMAN]    |
| E5RH77 | Uncharacterized protein OS=Homo sapiens GN=RPS14 PE=4 SV=1 - [E5RH77_HUMAN]    |
| E9PM36 | Uncharacterized protein OS=Homo sapiens GN=RPS2 PE=3 SV=1 - [E9PM36_HUMAN]     |
| D6RDJ2 | Uncharacterized protein OS=Homo sapiens GN=RPS23 PE=3 SV=1 - [D6RDJ2_HUMAN]    |
| C9J9K3 | Uncharacterized protein OS=Homo sapiens GN=RPSA PE=3 SV=1 - [C9J9K3_HUMAN]     |
| D6RA96 | Uncharacterized protein OS=Homo sapiens GN=RTEL1 PE=4 SV=1 - [D6RA96_HUMAN]    |
| E5RJE3 | Uncharacterized protein OS=Homo sapiens GN=RWDD1 PE=4 SV=1 - [E5RJE3_HUMAN]    |
| F5H2Z8 | Uncharacterized protein OS=Homo sapiens GN=SAGE1 PE=4 SV=1 - [F5H2Z8_HUMAN]    |
| B7Z5N7 | Uncharacterized protein OS=Homo sapiens GN=SCFD1 PE=2 SV=1 - [B7Z5N7_HUMAN]    |
| B4DH22 | Uncharacterized protein OS=Homo sapiens GN=SCRN1 PE=2 SV=1 - [B4DH22_HUMAN]    |
| F5H3U4 | Uncharacterized protein OS=Homo sapiens GN=SEC14L2 PE=4 SV=1 - [F5H3U4_HUMAN]  |
| B4DNE4 | Uncharacterized protein OS=Homo sapiens GN=SEPT7 PE=2 SV=1 - [B4DNE4_HUMAN]    |
| E5RIQ9 | Uncharacterized protein OS=Homo sapiens GN=SERF1A PE=4 SV=1 - [E5RIQ9_HUMAN]   |
| B4E3A8 | Uncharacterized protein OS=Homo sapiens GN=SERPINB1 PE=2 SV=1 - [B4E3A8_HUMAN] |
| C9JN98 | Uncharacterized protein OS=Homo sapiens GN=SERPINE2 PE=3 SV=1 - [C9JN98_HUMAN] |
| E9PJ04 | Uncharacterized protein OS=Homo sapiens GN=SF3B2 PE=4 SV=1 - [E9PJ04_HUMAN]    |
| E7EMJ6 | Uncharacterized protein OS=Homo sapiens GN=SGTA PE=4 SV=1 - [E7EMJ6_HUMAN]     |

|        |                                                                               |
|--------|-------------------------------------------------------------------------------|
| F5H229 | Uncharacterized protein OS=Homo sapiens GN=SH3GL2 PE=4 SV=1 - [F5H229_HUMAN]  |
| F5H7E2 | Uncharacterized protein OS=Homo sapiens GN=SKIV2L2 PE=4 SV=1 - [F5H7E2_HUMAN] |
| E5RI56 | Uncharacterized protein OS=Homo sapiens GN=SKP1 PE=4 SV=1 - [E5RI56_HUMAN]    |
| E5RJR5 | Uncharacterized protein OS=Homo sapiens GN=SKP1 PE=4 SV=1 - [E5RJR5_HUMAN]    |
| C9JK45 | Uncharacterized protein OS=Homo sapiens GN=SLC35E1 PE=4 SV=1 - [C9JK45_HUMAN] |
| B4DDK0 | Uncharacterized protein OS=Homo sapiens GN=SLC39A9 PE=2 SV=1 - [B4DDK0_HUMAN] |
| F5H6G3 | Uncharacterized protein OS=Homo sapiens GN=SLFN12L PE=4 SV=1 - [F5H6G3_HUMAN] |
| D6RBH9 | Uncharacterized protein OS=Homo sapiens GN=SMAD1 PE=4 SV=1 - [D6RBH9_HUMAN]   |
| F5H0U7 | Uncharacterized protein OS=Homo sapiens GN=SMC4 PE=4 SV=1 - [F5H0U7_HUMAN]    |
| E7EPV7 | Uncharacterized protein OS=Homo sapiens GN=SNCA PE=4 SV=1 - [E7EPV7_HUMAN]    |
| E7ESM6 | Uncharacterized protein OS=Homo sapiens GN=SND1 PE=4 SV=2 - [E7ESM6_HUMAN]    |
| B4DDC7 | Uncharacterized protein OS=Homo sapiens GN=SNRPA PE=2 SV=1 - [B4DDC7_HUMAN]   |
| E9PLV3 | Uncharacterized protein OS=Homo sapiens GN=SNX19 PE=4 SV=1 - [E9PLV3_HUMAN]   |
| B4DEK4 | Uncharacterized protein OS=Homo sapiens GN=SNX2 PE=2 SV=1 - [B4DEK4_HUMAN]    |
| Q9H5Q8 | Uncharacterized protein OS=Homo sapiens GN=SNX25 PE=2 SV=1 - [Q9H5Q8_HUMAN]   |
| E9PBC7 | Uncharacterized protein OS=Homo sapiens GN=SNX5 PE=4 SV=1 - [E9PBC7_HUMAN]    |
| B4DGT1 | Uncharacterized protein OS=Homo sapiens GN=SPTAN1 PE=2 SV=1 - [B4DGT1_HUMAN]  |
| C9J0K6 | Uncharacterized protein OS=Homo sapiens GN=SRI PE=4 SV=1 - [C9J0K6_HUMAN]     |
| E7ETK6 | Uncharacterized protein OS=Homo sapiens GN=SRP68 PE=4 SV=1 - [E7ETK6_HUMAN]   |
| B4DED5 | Uncharacterized protein OS=Homo sapiens GN=SRRM1 PE=2 SV=1 - [B4DED5_HUMAN]   |
| A6NMU3 | Uncharacterized protein OS=Homo sapiens GN=STAM PE=4 SV=1 - [A6NMU3_HUMAN]    |
| C9JZ93 | Uncharacterized protein OS=Homo sapiens GN=STAMBP PE=4 SV=1 - [C9JZ93_HUMAN]  |
| C9JQV3 | Uncharacterized protein OS=Homo sapiens GN=STK11IP PE=4 SV=1 - [C9JQV3_HUMAN] |
| B4E2V5 | Uncharacterized protein OS=Homo sapiens GN=STOM PE=2 SV=1 - [B4E2V5_HUMAN]    |
| B0AZV0 | Uncharacterized protein OS=Homo sapiens GN=STRAP PE=2 SV=1 - [B0AZV0_HUMAN]   |
| B5MCT9 | Uncharacterized protein OS=Homo sapiens GN=STXBP4 PE=4 SV=1 - [B5MCT9_HUMAN]  |
| F2Z3D0 | Uncharacterized protein OS=Homo sapiens GN=SUMO2 PE=4 SV=1 - [F2Z3D0_HUMAN]   |
| C9JIE4 | Uncharacterized protein OS=Homo sapiens GN=SYNM PE=3 SV=1 - [C9JIE4_HUMAN]    |
| A6NCR3 | Uncharacterized protein OS=Homo sapiens GN=SYNPO2L PE=4 SV=1 - [A6NCR3_HUMAN] |
| F5GWQ7 | Uncharacterized protein OS=Homo sapiens GN=TAF15 PE=4 SV=1 - [F5GWQ7_HUMAN]   |
| B8ZZD4 | Uncharacterized protein OS=Homo sapiens GN=TAX1BP1 PE=4 SV=1 - [B8ZZD4_HUMAN] |
| C9JF30 | Uncharacterized protein OS=Homo sapiens GN=TBC1D26 PE=4 SV=1 - [C9JF30_HUMAN] |
| F5GWQ9 | Uncharacterized protein OS=Homo sapiens GN=TBC1D3H PE=4 SV=1 - [F5GWQ9_HUMAN] |
| E5RIW3 | Uncharacterized protein OS=Homo sapiens GN=TBCA PE=4 SV=1 - [E5RIW3_HUMAN]    |
| A8MVD5 | Uncharacterized protein OS=Homo sapiens GN=TBCB PE=4 SV=1 - [A8MVD5_HUMAN]    |
| C9J1U4 | Uncharacterized protein OS=Homo sapiens GN=TBCD PE=4 SV=1 - [C9J1U4_HUMAN]    |
| D6RB05 | Uncharacterized protein OS=Homo sapiens GN=TEC PE=4 SV=1 - [D6RB05_HUMAN]     |
| E7EVC1 | Uncharacterized protein OS=Homo sapiens GN=TEKT4 PE=4 SV=1 - [E7EVC1_HUMAN]   |
| C9JVR1 | Uncharacterized protein OS=Homo sapiens GN=TENC1 PE=4 SV=1 - [C9JVR1_HUMAN]   |
| E7EQE3 | Uncharacterized protein OS=Homo sapiens GN=TEP1 PE=4 SV=1 - [E7EQE3_HUMAN]    |
| C9JJP5 | Uncharacterized protein OS=Homo sapiens GN=TFG PE=4 SV=1 - [C9JJP5_HUMAN]     |
| B4DIT7 | Uncharacterized protein OS=Homo sapiens GN=TGM2 PE=2 SV=1 - [B4DIT7_HUMAN]    |
| E5RIQ8 | Uncharacterized protein OS=Homo sapiens GN=THG1L PE=4 SV=1 - [E5RIQ8_HUMAN]   |



|        |                                                                                 |
|--------|---------------------------------------------------------------------------------|
| E7EUG5 | Uncharacterized protein OS=Homo sapiens GN=THUMPD2 PE=4 SV=1 - [E7EUG5_HUMAN]   |
| A6NJC0 | Uncharacterized protein OS=Homo sapiens GN=TMCC2 PE=4 SV=2 - [A6NJC0_HUMAN]     |
| B7Z588 | Uncharacterized protein OS=Homo sapiens GN=TNFRSF10B PE=2 SV=1 - [B7Z588_HUMAN] |
| E9PFH4 | Uncharacterized protein OS=Homo sapiens GN=TNPO3 PE=4 SV=1 - [E9PFH4_HUMAN]     |
| A8MY3  | Uncharacterized protein OS=Homo sapiens GN=TNRC6B PE=4 SV=3 - [A8MY3_HUMAN]     |
| F5H7S3 | Uncharacterized protein OS=Homo sapiens GN=TPM1 PE=3 SV=1 - [F5H7S3_HUMAN]      |
| B4DSE2 | Uncharacterized protein OS=Homo sapiens GN=TPP1 PE=2 SV=1 - [B4DSE2_HUMAN]      |
| E7EQD1 | Uncharacterized protein OS=Homo sapiens GN=TRA2B PE=4 SV=1 - [E7EQD1_HUMAN]     |
| B7WP88 | Uncharacterized protein OS=Homo sapiens GN=TRANK1 PE=4 SV=2 - [B7WP88_HUMAN]    |
| F5H012 | Uncharacterized protein OS=Homo sapiens GN=TRIM21 PE=4 SV=1 - [F5H012_HUMAN]    |
| C9JNQ0 | Uncharacterized protein OS=Homo sapiens GN=TRIM6 PE=4 SV=1 - [C9JNQ0_HUMAN]     |
| F5H1Z0 | Uncharacterized protein OS=Homo sapiens GN=TRIP11 PE=4 SV=1 - [F5H1Z0_HUMAN]    |
| E9PGT1 | Uncharacterized protein OS=Homo sapiens GN=TSN PE=4 SV=1 - [E9PGT1_HUMAN]       |
| E7ES78 | Uncharacterized protein OS=Homo sapiens GN=TTC26 PE=4 SV=1 - [E7ES78_HUMAN]     |
| D6RCE2 | Uncharacterized protein OS=Homo sapiens GN=TTC37 PE=4 SV=1 - [D6RCE2_HUMAN]     |
| A6NKB1 | Uncharacterized protein OS=Homo sapiens GN=TTN PE=4 SV=4 - [A6NKB1_HUMAN]       |
| D6RDV0 | Uncharacterized protein OS=Homo sapiens GN=TUSC3 PE=4 SV=1 - [D6RDV0_HUMAN]     |
| E9PIR7 | Uncharacterized protein OS=Homo sapiens GN=TXNRD1 PE=3 SV=1 - [E9PIR7_HUMAN]    |
| E7EWE1 | Uncharacterized protein OS=Homo sapiens GN=UBA5 PE=4 SV=1 - [E7EWE1_HUMAN]      |
| F2Z363 | Uncharacterized protein OS=Homo sapiens GN=UBE2F PE=4 SV=1 - [F2Z363_HUMAN]     |
| D6RDM7 | Uncharacterized protein OS=Homo sapiens GN=UBE2K PE=4 SV=1 - [D6RDM7_HUMAN]     |
| E9PJ81 | Uncharacterized protein OS=Homo sapiens GN=UBXN1 PE=4 SV=1 - [E9PJ81_HUMAN]     |
| B4DW59 | Uncharacterized protein OS=Homo sapiens GN=UCL5 PE=2 SV=1 - [B4DW59_HUMAN]      |
| A6NJ11 | Uncharacterized protein OS=Homo sapiens GN=UFD1L PE=4 SV=1 - [A6NJ11_HUMAN]     |
| C9JKD6 | Uncharacterized protein OS=Homo sapiens GN=UGP2 PE=4 SV=1 - [C9JKD6_HUMAN]      |
| C9J1U3 | Uncharacterized protein OS=Homo sapiens GN=UNC80 PE=4 SV=1 - [C9J1U3_HUMAN]     |
| E9PG85 | Uncharacterized protein OS=Homo sapiens GN=UROS PE=4 SV=1 - [E9PG85_HUMAN]      |
| B7Z7T5 | Uncharacterized protein OS=Homo sapiens GN=USP7 PE=2 SV=1 - [B7Z7T5_HUMAN]      |
| B0V043 | Uncharacterized protein OS=Homo sapiens GN=VAR5 PE=3 SV=1 - [B0V043_HUMAN]      |
| F5H2A7 | Uncharacterized protein OS=Homo sapiens GN=VBP1 PE=4 SV=1 - [F5H2A7_HUMAN]      |
| E5RHE1 | Uncharacterized protein OS=Homo sapiens GN=VDAC3 PE=4 SV=1 - [E5RHE1_HUMAN]     |
| F5H4L7 | Uncharacterized protein OS=Homo sapiens GN=VPS26A PE=4 SV=1 - [F5H4L7_HUMAN]    |
| F5GYF5 | Uncharacterized protein OS=Homo sapiens GN=VPS35 PE=4 SV=1 - [F5GYF5_HUMAN]     |
| A6NG10 | Uncharacterized protein OS=Homo sapiens GN=WBP2 PE=2 SV=2 - [A6NG10_HUMAN]      |
| C9JJ54 | Uncharacterized protein OS=Homo sapiens GN=WDFY1 PE=4 SV=1 - [C9JJ54_HUMAN]     |
| F2Z372 | Uncharacterized protein OS=Homo sapiens GN=WDFY4 PE=4 SV=1 - [F2Z372_HUMAN]     |
| B4DP38 | Uncharacterized protein OS=Homo sapiens GN=WDR77 PE=2 SV=1 - [B4DP38_HUMAN]     |
| C9JY66 | Uncharacterized protein OS=Homo sapiens GN=WHSC1L1 PE=3 SV=1 - [C9JY66_HUMAN]   |
| E7EVF6 | Uncharacterized protein OS=Homo sapiens GN=WIP1 PE=4 SV=1 - [E7EVF6_HUMAN]      |
| F5GWT4 | Uncharacterized protein OS=Homo sapiens GN=WNK1 PE=4 SV=1 - [F5GWT4_HUMAN]      |
| C9K044 | Uncharacterized protein OS=Homo sapiens GN=XAF1 PE=4 SV=1 - [C9K044_HUMAN]      |
| Q5T6H7 | Uncharacterized protein OS=Homo sapiens GN=XPNPEP1 PE=2 SV=1 - [Q5T6H7_HUMAN]   |
| F2Z2X4 | Uncharacterized protein OS=Homo sapiens GN=XPO4 PE=4 SV=1 - [F2Z2X4_HUMAN]      |

|        |                                                                                                            |
|--------|------------------------------------------------------------------------------------------------------------|
| E7ESC6 | Uncharacterized protein OS=Homo sapiens GN=XPO7 PE=4 SV=1 - [E7ESC6_HUMAN]                                 |
| F5H1I8 | Uncharacterized protein OS=Homo sapiens GN=XRCC6 PE=4 SV=1 - [F5H1I8_HUMAN]                                |
| E9PKX1 | Uncharacterized protein OS=Homo sapiens GN=ZCCHC11 PE=4 SV=1 - [E9PKX1_HUMAN]                              |
| F5GWB2 | Uncharacterized protein OS=Homo sapiens GN=ZNF225 PE=4 SV=1 - [F5GWB2_HUMAN]                               |
| F5H6H3 | Uncharacterized protein OS=Homo sapiens GN=ZNF268 PE=4 SV=1 - [F5H6H3_HUMAN]                               |
| Q96I98 | Uncharacterized protein OS=Homo sapiens GN=ZNF324 PE=2 SV=1 - [Q96I98_HUMAN]                               |
| C9JLT3 | Uncharacterized protein OS=Homo sapiens GN=ZNF502 PE=4 SV=1 - [C9JLT3_HUMAN]                               |
| C9JZC2 | Uncharacterized protein OS=Homo sapiens GN=ZNF621 PE=4 SV=1 - [C9JZC2_HUMAN]                               |
| E5RH94 | Uncharacterized protein OS=Homo sapiens PE=4 SV=1 - [E5RH94_HUMAN]                                         |
| E9PQI5 | Uncharacterized protein OS=Homo sapiens PE=4 SV=1 - [E9PQI5_HUMAN]                                         |
| F5GWM9 | Uncharacterized protein OS=Homo sapiens PE=4 SV=1 - [F5GWM9_HUMAN]                                         |
| C9J8M8 | Uncharacterized protein OS=Homo sapiens PE=4 SV=2 - [C9J8M8_HUMAN]                                         |
| C9JH24 | Uncharacterized protein OS=Homo sapiens PE=4 SV=2 - [C9JH24_HUMAN]                                         |
| E9PDI5 | Uncharacterized protein OS=Homo sapiens PE=4 SV=2 - [E9PDI5_HUMAN]                                         |
| Q9H993 | UPF0364 protein C6orf211 OS=Homo sapiens GN=C6orf211 PE=1 SV=1 - [CF211_HUMAN]                             |
| Q9H7C9 | UPF0366 protein C11orf67 OS=Homo sapiens GN=C11orf67 PE=1 SV=1 - [CK067_HUMAN]                             |
| Q14667 | UPF0378 protein KIAA0100 OS=Homo sapiens GN=KIAA0100 PE=1 SV=3 - [K0100_HUMAN]                             |
| Q3KRA6 | UPF0538 protein C2orf76 OS=Homo sapiens GN=C2orf76 PE=2 SV=3 - [CB076_HUMAN]                               |
| Q5T6V5 | UPF0553 protein C9orf64 OS=Homo sapiens GN=C9orf64 PE=1 SV=1 - [CI064_HUMAN]                               |
| Q8N8R5 | UPF0565 protein C2orf69 OS=Homo sapiens GN=C2orf69 PE=2 SV=1 - [CB069_HUMAN]                               |
| Q9Y224 | UPF0568 protein C14orf166 OS=Homo sapiens GN=C14orf166 PE=1 SV=1 - [CN166_HUMAN]                           |
| Q9NWW4 | UPF0587 protein C1orf123 OS=Homo sapiens GN=C1orf123 PE=1 SV=1 - [CA123_HUMAN]                             |
| A6NDU8 | UPF0600 protein C5orf51 OS=Homo sapiens GN=C5orf51 PE=1 SV=1 - [CE051_HUMAN]                               |
| P06132 | Uroporphyrinogen decarboxylase OS=Homo sapiens GN=UROD PE=1 SV=2 - [DCUP_HUMAN]                            |
| P54725 | UV excision repair protein RAD23 homolog A OS=Homo sapiens GN=RAD23A PE=1 SV=1 - [RD23A_HUMAN]             |
| P54727 | UV excision repair protein RAD23 homolog B OS=Homo sapiens GN=RAD23B PE=1 SV=1 - [RD23B_HUMAN]             |
| P21281 | V-type proton ATPase subunit B, brain isoform OS=Homo sapiens GN=ATP6V1B2 PE=1 SV=3 - [VATB2_HUMAN]        |
| Q9Y5K8 | V-type proton ATPase subunit D OS=Homo sapiens GN=ATP6V1D PE=1 SV=1 - [VATD_HUMAN]                         |
| O75348 | V-type proton ATPase subunit G 1 OS=Homo sapiens GN=ATP6V1G1 PE=1 SV=3 - [VATG1_HUMAN]                     |
| Q9UBQ0 | Vacuolar protein sorting-associated protein 29 OS=Homo sapiens GN=VPS29 PE=1 SV=1 - [VPS29_HUMAN]          |
| Q9UN37 | Vacuolar protein sorting-associated protein 4A OS=Homo sapiens GN=VPS4A PE=1 SV=1 - [VPS4A_HUMAN]          |
| Q9NP79 | Vacuolar protein sorting-associated protein VTA1 homolog OS=Homo sapiens GN=VTA1 PE=1 SV=1 - [VTA1_HUMAN]  |
| P35968 | Vascular endothelial growth factor receptor 2 OS=Homo sapiens GN=KDR PE=1 SV=2 - [VGFR2_HUMAN]             |
| O15195 | Villin-like protein OS=Homo sapiens GN=VILL PE=2 SV=3 - [VILL_HUMAN]                                       |
| P18206 | Vinculin OS=Homo sapiens GN=VCL PE=1 SV=4 - [VINC_HUMAN]                                                   |
| P04275 | von Willebrand factor OS=Homo sapiens GN=VWF PE=1 SV=4 - [VWF_HUMAN]                                       |
| Q5MNZ9 | WD repeat domain phosphoinositide-interacting protein 1 OS=Homo sapiens GN=WIFI1 PE=1 SV=3 - [WIFI1_HUMAN] |
| O75083 | WD repeat-containing protein 1 OS=Homo sapiens GN=WDR1 PE=1 SV=4 - [WDR1_HUMAN]                            |
| Q9BZH6 | WD repeat-containing protein 11 OS=Homo sapiens GN=WDR11 PE=1 SV=1 - [WDR11_HUMAN]                         |
| Q6ZQ6  | WD repeat-containing protein 87 OS=Homo sapiens GN=WDR87 PE=2 SV=3 - [WDR87_HUMAN]                         |
| P13010 | X-ray repair cross-complementing protein 5 OS=Homo sapiens GN=XRCC5 PE=1 SV=3 - [XRCC5_HUMAN]              |
| A4UGR9 | Xin actin-binding repeat-containing protein 2 OS=Homo sapiens GN=XIRP2 PE=1 SV=2 - [XIRP2_HUMAN]           |
| Q86Y38 | Xylosyltransferase 1 OS=Homo sapiens GN=XYLT1 PE=1 SV=1 - [XYLT1_HUMAN]                                    |

|        |                                                                                                |
|--------|------------------------------------------------------------------------------------------------|
| Q7Z2W4 | Zinc finger CCCH-type antiviral protein 1 OS=Homo sapiens GN=ZC3HAV1 PE=1 SV=3 - [ZCCHV_HUMAN] |
| Q9UJW7 | Zinc finger protein 229 OS=Homo sapiens GN=ZNF229 PE=2 SV=3 - [ZN229_HUMAN]                    |
| Q3ZCT1 | Zinc finger protein 260 OS=Homo sapiens GN=ZNF260 PE=2 SV=3 - [ZN260_HUMAN]                    |
| Q53GI3 | Zinc finger protein 394 OS=Homo sapiens GN=ZNF394 PE=2 SV=2 - [ZN394_HUMAN]                    |
| Q6AHZ1 | Zinc finger protein 518A OS=Homo sapiens GN=ZNF518A PE=1 SV=2 - [Z518A_HUMAN]                  |
| Q96C55 | Zinc finger protein 524 OS=Homo sapiens GN=ZNF524 PE=2 SV=1 - [ZN524_HUMAN]                    |
| Q08AN1 | Zinc finger protein 616 OS=Homo sapiens GN=ZNF616 PE=2 SV=2 - [ZN616_HUMAN]                    |
| Q5T619 | Zinc finger protein 648 OS=Homo sapiens GN=ZNF648 PE=1 SV=1 - [ZN648_HUMAN]                    |
| Q6PK81 | Zinc finger protein 773 OS=Homo sapiens GN=ZNF773 PE=2 SV=1 - [ZN773_HUMAN]                    |
| Q7Z570 | Zinc finger protein 804A OS=Homo sapiens GN=ZNF804A PE=1 SV=3 - [Z804A_HUMAN]                  |
| B7ZM62 | ZMYND8 protein OS=Homo sapiens GN=ZMYND8 PE=2 SV=1 - [B7ZM62_HUMAN]                            |
