# Supplementary material
Source: PubMed Central journal article supplement (PMC5083095)
Supplement: 10.1074_M115.057315_mcp.M115.057315-6.pdf [file 10.1074_M115.057315_mcp.M115.057315-6.pdf]

**Supplemental Table 3. Comparison of the level of RBC blood group proteins between autologous endogenous and *in vitro* differentiated erythroid cells.**

Endogenous cord RBCs and reticulocytes (Retic) differentiated *in vitro* from cord CD34<sup>+</sup> cells isolated from the same donor were fractionated and proteins subjected to trypsin digest, with resultant peptides labelled with TMTs for nanoLC-MS/MS based quantitation. Values show the ratio of protein levels between the cord RBCs and reticulocytes. Proteins were quantified from at least 2 unique peptides. Peptides and unique peptides; the total number of peptide sequences and number of unique peptides identified for that protein. Proteome Discoverer software v1.4 was used for analysis.

| <b>Accession</b> | <b>Description</b>                         | <b>System</b> | <b>Unique Peptides</b> | <b>Peptides</b> | <b>Cord RBC/Retic</b> |
|------------------|--------------------------------------------|---------------|------------------------|-----------------|-----------------------|
| C9JGQ9           | ACHE                                       | Yt            | 5                      | 5               | 1.570                 |
| E9PC21           | AQP1                                       | Colton        | 2                      | 2               | 3.869                 |
| Q9NP58           | ATP-binding cassette sub-family B member 6 | LAN           | 14                     | 15              | 1.244                 |
| Q9UNQ0           | ATP-binding cassette sub-family G member 2 | JR            | 3                      | 3               | 2.045                 |
| P02730           | Band 3 anion transport protein             | Dieago        | 27                     | 27              | 3.168                 |
| P50895           | Basal cell adhesion molecule               | Lutheran      | 10                     | 10              | 2.328                 |
| Q54A51           | Basigin                                    | Ok            | 11                     | 11              | 1.547                 |

|        |                                           |                        |    |    |        |
|--------|-------------------------------------------|------------------------|----|----|--------|
| Q02161 | Blood group Rh(D)<br>polypeptide          | Rh                     | 1  | 2  | 13.012 |
| A6H8M8 | C4A protein                               | Chido/Rodgers          | 1  | 1  | 1.590  |
| B6EAT9 | CD44                                      | Indian                 | 6  | 6  | 1.743  |
| E9PNW4 | CD59                                      | CD59                   | 3  | 3  | 3.794  |
| A6NIW1 | CD99 antigen                              | Xg                     | 1  | 1  | 1.324  |
| E9PDY4 | CR1                                       | knops                  | 2  | 2  | 0.673  |
| Q14UF5 | Decay-accelerating<br>factor              | Cromer                 | 11 | 11 | 3.390  |
| Q93070 | Ecto-ADP-<br>ribosyltransferase 4         | Dombrock               | 3  | 3  | 2.638  |
| Q96PL5 | Erythroid membrane-<br>associated protein | Scianna                | 10 | 10 | 2.228  |
| B8Q185 | Glycophorin A MNS<br>blood group          | MNS                    | 3  | 3  | 5.967  |
| P04921 | Glycophorin-C                             | Gerbich                | 4  | 4  | 2.774  |
| Q14773 | Intercellular adhesion<br>molecule 4      | Landsteiner-<br>Wiener | 5  | 5  | 4.578  |
| P23276 | Kell blood group<br>glycoprotein          | Kell                   | 8  | 8  | 2.502  |
| P51811 | Membrane transport<br>protein XK          | Kx                     | 6  | 6  | 2.481  |
| F5H250 | RHAG                                      | Rh associated          | 1  | 1  | 4.191  |

|        |                               |                      |   |   |       |
|--------|-------------------------------|----------------------|---|---|-------|
|        |                               | glycoprotein         |   |   |       |
| E7EWZ5 | RHCE                          | Rh                   | 1 | 2 | 8.344 |
| O75326 | Semaphorin-7A                 | John Milton<br>Hagen | 8 | 8 | 1.887 |
| E9PR61 | SLC14A1                       | Kidd                 | 1 | 5 | 1.427 |
| Q13336 | Urea transporter 1<br>SLC14A1 | Kidd                 | 3 | 7 | 2.066 |
