# Supplementary material
Source: PubMed Central journal article supplement (PMC5083095)
Supplement: 10.1074_M115.057315_mcp.M115.057315-8.pdf [file 10.1074_M115.057315_mcp.M115.057315-8.pdf]

**Supplemental Table 5. Comparing the level of band 3-ankyrin macro-complex and 4.1R junctional complex components, transport proteins, adhesion proteins, cytoskeleton proteins and metabolic enzymes between adult and cord RBCs and reticulocytes.**

See legend for Supplemental Table 4 for experimental details. Values show the ratio of protein levels between adult and cord RBCs and adult and cord reticulocytes in the membrane and or cytosol fraction. Proteins were quantified from at least 1 unique peptide. Proteins quantified from 2 or more unique peptides that differed in level by 2 fold or more are in bold text. \* = protein did not differ in level when compared in second cord sample. Peptides and unique peptides: the total number of peptide sequences and number of unique peptides identified for that protein.

| Accession | Description | Unique peptides | Peptides | RBC adult/<br>cord | Retic adult/<br>cord |
|-----------|-------------|-----------------|----------|--------------------|----------------------|
|-----------|-------------|-----------------|----------|--------------------|----------------------|

**Proteins of the band 3-ankyrin macro-complex and 4.1R junctional complex**

|        |                                           |     |     |       |       |
|--------|-------------------------------------------|-----|-----|-------|-------|
| P60709 | Actin, cytoplasmic 1                      | 8   | 19  | 1.440 | 1.292 |
| A2A3N8 | Adducin (alpha)                           | 2   | 25  | 1.585 | 1.480 |
| P35612 | Adducin (beta)                            | 10  | 32  | 1.775 | 1.413 |
| E7EVE3 | Ankyrin 1                                 | 81  | 88  | 1.583 | 1.547 |
| Q53ER1 | Ankyrin 1 isoform 5 variant               | 1   | 3   | 1.685 | 1.454 |
| Q12955 | Ankyrin 3                                 | 1   | 8   | 1.453 | 1.045 |
| P02730 | Band 3 anion transport protein            | 27  | 27  | 1.750 | 1.648 |
| E9PB22 | CD47                                      | 3   | 3   | 1.706 | 1.675 |
| Q08495 | Dematin                                   | 20  | 20  | 1.490 | 1.513 |
| B4DZV5 | 55 kDa erythrocyte membrane protein (p55) | 19  | 19  | 1.138 | 1.083 |
| B8Q185 | Glycophorin A MNS blood group             | 3   | 3   | 1.333 | 1.847 |
| P04921 | Glycophorin-C                             | 4   | 4   | 1.646 | 1.432 |
| Q14773 | Intercellular adhesion molecule 4         | 5   | 5   | 0.510 | 0.832 |
| P23276 | Kell blood group glycoprotein             | 8   | 8   | 1.594 | 1.121 |
| P51811 | Membrane transport protein XK             | 6   | 6   | 0.833 | 1.103 |
| P11171 | Protein 4.1                               | 8   | 44  | 1.216 | 1.553 |
| Q4KKX0 | Protein 4.2                               | 31  | 31  | 1.693 | 1.488 |
| F5H250 | RhAG                                      | 1   | 1   | 0.654 | 2.414 |
| E7EWZ5 | Rh blood group, CcEe antigens             | 1   | 2   | 2.388 | 2.099 |
| Q02161 | Blood group Rh(D) polypeptide             | 1   | 2   | 1.269 | 3.548 |
| P11166 | GLUT1                                     | 8   | 8   | 1.012 | 1.276 |
| P02549 | Spectrin alpha chain, erythrocyte         | 164 | 165 | 1.754 | 1.539 |
| P11277 | Spectrin beta chain, erythrocyte          | 153 | 154 | 1.729 | 1.508 |
| P28289 | Tropomodulin-1                            | 22  | 22  | 1.457 | 1.473 |
| Q5JR82 | Tropomodulin 4                            | 1   | 1   | 4.415 | 0.741 |
| F5H7S3 | Tropomyosin 1                             | 18  | 1   | 1.598 | 1.727 |
| D9YZV5 | Tropomyosin 1 isoform 4                   | 1   | 17  | 1.346 | 1.256 |

|        |                         |   |    |       |       |
|--------|-------------------------|---|----|-------|-------|
| D9YZV7 | Tropomyosin 1 isoform 6 | 2 | 15 | 1.347 | 1.350 |
| Q5VU58 | Tropomyosin 3           | 2 | 20 | 1.480 | 1.759 |

### Transport proteins

|        |                                                                                   |    |    |              |        |
|--------|-----------------------------------------------------------------------------------|----|----|--------------|--------|
| P04920 | Anion exchange protein 2                                                          | 1  | 1  | 0.586        | 1.223  |
| E9PC21 | Aquaporin 1                                                                       | 2  | 2  | <b>2.104</b> | 1.565  |
| P20020 | Plasma membrane calcium-transporting ATPase 1                                     | 9  | 19 | 1.287        | 1.122  |
| P23634 | Plasma membrane calcium-transporting ATPase 4                                     | 16 | 26 | 1.259        | 0.983  |
| F5H3A1 | ATPase, Na <sup>+</sup> /K <sup>+</sup> Transporting, Alpha 1 Polypeptide         | 19 | 19 | 1.539        | 0.681  |
| P14415 | Sodium/potassium-transporting ATPase subunit beta-2                               | 1  | 1  | 1.751        | 1.584  |
| P54709 | Sodium/potassium-transporting ATPase subunit beta-3                               | 4  | 4  | 0.785        | 0.483  |
| P02730 | Band 3 anion transport protein                                                    | 27 | 27 | 1.750        | 1.648  |
| Q99808 | Equilibrative nucleoside transporter 1                                            | 9  | 9  | 0.699        | 0.658  |
| O43826 | Glucose-6-phosphate translocase                                                   | 1  | 1  | 1.851        | 1.129  |
| Q15758 | Neutral amino acid transporter B(0)                                               | 3  | 3  | 0.471        | 0.428* |
| Q01650 | Large neutral amino acids transporter small subunit 1                             | 3  | 3  | 0.891        | 0.376* |
| O75387 | Large neutral amino acids transporter small subunit 3                             | 1  | 1  | 5.020        | 0.712  |
| P53985 | Monocarboxylate transporter 1                                                     | 6  | 6  | 0.666        | 1.517  |
| F5H250 | Rh-Associated Glycoprotein (RhAG)                                                 | 1  | 1  | 0.654        | 2.414  |
| F5H741 | Solute Carrier Family 11, Proton-Coupled Divalent Metal Ion Transporter, Member 2 | 1  | 1  | 1.285        | 1.046  |
| P11166 | Solute carrier family 2, facilitated glucose transporter member 1 (GLUT1)         | 8  | 8  | 1.012        | 1.276  |
| P14672 | Solute carrier family 2, facilitated glucose transporter member 4                 | 1  | 1  | 2.221        | 0.637  |
| Q8TD20 | Solute carrier family 2, facilitated glucose transporter member 12                | 1  | 1  | 0.114        | 0.209  |
| B7Z844 | Solute Carrier Family 2 Facilitated Glucose Transporter, Member 14                | 2  | 2  | 1.802        | 1.071  |
| F5H843 | Solute Carrier Family 16, Monocarboxylate Transporter, Member 7                   | 1  | 1  | 1.082        | 1.124  |
| E7EMT4 | Solute Carrier Family 39, Zinc Transporter, Member 7                              | 1  | 1  | 0.957        | 0.872  |
| Q9NP59 | Solute carrier family 40 member 1                                                 | 4  | 4  | 1.335        | 1.104  |
| B7Z6X9 | Solute Carrier Family 43, Amino                                                   | 3  | 3  | 1.185        | 1.017  |

|        |                                       |   |   |       |       |
|--------|---------------------------------------|---|---|-------|-------|
|        | Acid System L Transporter, Member 2   |   |   |       |       |
| E9PS74 | Solute Carrier Family 43, Member 3    | 5 | 5 | 1.627 | 0.821 |
| Q13336 | Urea transporter 1 (Kidd blood group) | 3 | 7 | 1.512 | 1.307 |
| Q9Y6M5 | Zinc transporter 1                    | 4 | 4 | 1.590 | 0.873 |

### Adhesion proteins

|        |                                       |    |    |              |       |
|--------|---------------------------------------|----|----|--------------|-------|
| P50895 | Basal cell adhesion molecule          | 10 | 10 | <b>3.236</b> | 1.560 |
| B6EAT9 | CD44                                  | 6  | 6  | 1.274        | 0.771 |
| E9PB22 | CD47                                  | 3  | 3  | 1.706        | 1.675 |
| B1AMW1 | CD58                                  | 2  | 2  | 1.752        | 1.394 |
| A6NIW1 | CD99                                  | 1  | 1  | 2.840        | 1.129 |
| Q96PL5 | Erythroid membrane-associated protein | 10 | 10 | 1.397        | 1.128 |
| P05556 | Integrin beta-1                       | 7  | 7  | 0.861        | 0.663 |
| Q14773 | Intercellular adhesion molecule 4     | 5  | 5  | 0.510        | 0.832 |
| O75326 | Semaphorin-7A                         | 8  | 8  | <b>2.152</b> | 1.399 |

### Cytoskeleton proteins

|        |                                                          |    |    |        |       |
|--------|----------------------------------------------------------|----|----|--------|-------|
| F5GXS2 | Actinin alpha 4                                          | 3  | 3  | 0.494  | 0.670 |
| P60709 | Actin, cytoplasmic 1                                     | 8  | 19 | 1.440  | 1.292 |
| P63267 | Actin, gamma                                             | 1  | 12 | 1.585  | 1.334 |
| F5H3P5 | Actin-Related Protein 3 Homolog                          | 5  | 5  | 0.487  | 0.989 |
| P61160 | Actin-related protein 2                                  | 3  | 4  | 0.621  | 1.069 |
| P61163 | Alpha-centractin                                         | 13 | 14 | 0.897  | 0.683 |
| B49LQ7 | Actin-related protein 2/3 complex subunit 1A             | 2  | 2  | 0.568  | 0.971 |
| O15143 | Actin-related protein 2/3 complex subunit 1B             | 1  | 1  | 0.683  | 1.123 |
| O15144 | Actin-related protein 2/3 complex subunit 2              | 7  | 7  | 0.514  | 1.001 |
| P59998 | Actin-related protein 2/3 complex subunit 4              | 4  | 4  | 0.406* | 0.985 |
| B1ALC0 | Actin-related protein 2/3 complex subunit 5              | 1  | 1  | 0.587  | 1.000 |
| Q9BPX5 | Actin-related protein 2/3 complex subunit 5-like protein | 1  | 1  | 0.504  | 1.080 |
| A2A3N8 | Adducin (alpha)                                          | 2  | 25 | 1.151  | 1.590 |
| P35612 | Adducin (beta)                                           | 10 | 32 | 1.775  | 1.413 |
| Q9UEY8 | Adducin (gamma)                                          | 9  | 9  | 0.475  | 1.022 |
| Q53ER1 | Ankyrin 1 isoform 5 variant                              | 1  | 3  | 1.685  | 1.454 |
| Q12955 | Ankyrin 3                                                | 1  | 8  | 1.453  | 1.045 |
| E7EVE3 | Ankyrin 1                                                | 81 | 88 | 1.583  | 1.547 |
| B1AK87 | Capping protein (Actin filament) muscle Z-line, beta     | 6  | 6  | 0.928  | 0.897 |

|         |                                                          |     |     |              |        |
|---------|----------------------------------------------------------|-----|-----|--------------|--------|
| C9JUG7  | Capping Protein (Actin Filament) Muscle Z-Line, Alpha 2  | 1   | 2   | 1.124        | 0.897  |
| P52907  | F-actin-capping protein subunit alpha-1                  | 5   | 6   | 0.872        | 0.841  |
| E9PP50  | Cofilin 1                                                | 3   | 3   | 0.743        | 0.602  |
| Q08495  | Dematin                                                  | 20  | 20  | 1.490        | 1.513  |
| P15924  | Desmoplakin                                              | 1   | 2   |              |        |
| B4DYA6  | Destrin isoform CRA_a                                    | 2   | 3   | 0.734        | 0.627  |
| Q8TD57  | Dynein heavy chain 3, axonemal                           | 1   | 2   |              |        |
| E9PFS5  | Dynactin 1                                               | 21  | 21  | 0.918        | 0.675  |
| Q5T1I6  | Dynactin 3                                               | 3   | 3   | 1.140        | 0.817  |
| E5RI97  | Dynactin 4                                               | 1   | 1   | 0.832        | 0.808  |
| E7EWW81 | Dynactin 5                                               | 1   | 1   | 0.795        | 0.699  |
| Q13561  | Dynactin 2                                               | 14  | 14  | 0.944        | 0.694  |
| P50570  | Dynammin-2                                               | 1   | 25  | 1.394        | 1.317  |
| Q8TD57  | Dynein heavy chain 3, axonemal                           | 1   | 2   |              |        |
| P63167  | Dynein light chain 1, cytoplasmic                        | 1   | 1   | 0.338        | 0.576  |
| Q96FJ2  | Dynein light chain 2, cytoplasmic                        | 1   | 1   | 0.944        | 0.824  |
| Q5HY54  | Filamin A                                                | 13  | 13  | 0.693        | 0.819  |
| E7EN95  | Filamin B                                                | 1   | 1   | 0.081        | 0.334  |
| F5H8M4  | Gelsolin                                                 | 2   | 2   | 1.991        | 1.343  |
| P33176  | Kinesin-1 heavy chain                                    | 5   | 5   | 1.146        | 0.754  |
| B7WPD9  | Kinesin Family Member 26B                                | 1   | 1   | 0.478        | 1.172  |
| Q15691  | Microtubule-associated protein RP/EB family member 1     | 2   | 2   | 0.689        | 0.689  |
| F5H678  | Myosin VB                                                | 1   | 1   | 1.713        | 1.300  |
| P12829  | Myosin light chain 4                                     | 8   | 8   | 0.613        | 0.869  |
| P60660  | Myosin light polypeptide 6                               | 3   | 3   | 0.884        | 0.984  |
| P19105  | Myosin regulatory light chain 12A                        | 4   | 4   | <b>0.339</b> | 0.918  |
| Q96A32  | Myosin regulatory light chain 2                          | 1   | 1   | 0.985        | 0.914  |
| Q3MIV8  | Myosin, heavy chain 11                                   | 1   | 13  | 0.356*       | 0.536  |
| Q9BUF9  | Myosin, light chain 9, regulatory                        | 2   | 2   | 0.613        | 0.780  |
| P35580  | Myosin-10                                                | 74  | 88  | <b>0.175</b> | 0.737  |
| P35579  | Myosin-9                                                 | 83  | 96  | <b>0.375</b> | 0.796  |
| O94832  | Myosin-Id                                                | 1   | 1   | 1.712        | 1.118  |
| Q13459  | Myosin-IXb                                               | 1   | 1   | 1.083        | 0.707  |
| Q9NYT0  | Pleckstrin-2                                             | 1   | 1   | 0.670        | 0.448* |
| A0JP02  | Pleckstrin Homology Domain Containing, Family A Member 5 | 1   | 1   | 0.904        | 0.513  |
| P07737  | Profilin-1                                               | 5   | 5   | 1.371        | 0.546  |
| D6RGI3  | Septin 11, isoform CRA_b                                 | 3   | 5   | 0.343*       | 1.531  |
| B5MCX3  | Septin 2                                                 | 5   | 5   | 0.369*       | 1.527  |
| B4DNE4  | Septin 7                                                 | 10  | 11  | 0.508        | 1.276  |
| A6NMH6  | Septin 8                                                 | 5   | 7   | 0.453*       | 1.674  |
| Q9UHD8  | Septin-9                                                 | 1   | 1   | 0.941        | 0.834  |
| P02549  | Spectrin alpha chain, erythrocyte                        | 164 | 165 | 1.287        | 1.564  |
| P11277  | Spectrin beta chain, erythrocyte                         | 153 | 154 | 1.280        | 1.465  |

|        |                                 |    |    |        |        |
|--------|---------------------------------|----|----|--------|--------|
| O15020 | Spectrin beta chain, brain 2    | 1  | 1  | 0.518  | 0.709  |
| P16949 | Stathmin                        | 14 | 14 | 0.611  | 0.560  |
| Q5TCU6 | Talin 1                         | 40 | 40 | 0.433  | 0.583  |
| P28289 | Tropomodulin-1                  | 22 | 22 | 1.457  | 1.473  |
| Q5JR82 | Tropomodulin 4                  | 1  | 1  | 4.415  | 0.741  |
| F5H7S3 | Tropomyosin 1                   | 1  | 18 | 1.598  | 1.727  |
| D9YZV5 | Tropomyosin 1 (Alpha) isoform 4 | 1  | 17 | 0.823  | 1.116  |
| D9YZV7 | Tropomyosin 1 (Alpha) isoform 6 | 2  | 15 | 0.890  | 1.275  |
| Q5VU58 | Tropomyosin 3                   | 2  | 20 | 1.129  | 1.203  |
| Q9BQE3 | Tubulin alpha-1C chain          | 4  | 13 | 0.566  | 0.569  |
| P07437 | Tubulin beta chain              | 1  | 12 | 0.248* | 0.431* |
| P68371 | Tubulin beta-2C chain           | 1  | 12 | 0.562  | 0.611  |
| A8MUB1 | Tubulin alpha-4A                | 1  | 10 | 0.037  | 0.331  |
| F5H7T3 | Vinculin                        | 1  | 1  | 0.300* | 1.167  |

### Metabolic enzymes

|        |                                                             |    |    |              |       |
|--------|-------------------------------------------------------------|----|----|--------------|-------|
| P00568 | Adenylate kinase isoenzyme                                  | 11 | 12 | 1.633        | 0.865 |
| P00915 | Carbonic anhydrase 1                                        | 11 | 11 | <b>8.706</b> | 1.075 |
| P00918 | Carbonic anhydrase 2                                        | 11 | 11 | <b>4.976</b> | 1.470 |
| P04040 | Catalase                                                    | 30 | 30 | 1.135        | 0.903 |
| B7Z2X9 | Enolase                                                     | 5  | 8  | 0.811        | 0.698 |
| P04075 | Fructose-bisphosphate aldolase A                            | 15 | 20 | 0.485        | 1.038 |
| P09972 | Fructose-bisphosphate aldolase C                            | 5  | 10 | 0.576        | 1.386 |
| E7ET32 | Galactose-1-phosphate<br>uridylyltransferase                | 1  | 1  | 0.863        | 0.606 |
| P11413 | Glucose-6-phosphate 1-<br>dehydrogenase                     | 13 | 13 | 0.575        | 0.641 |
| P06744 | Glucose-6-phosphate isomerase                               | 19 | 19 | 0.494        | 0.771 |
| P07203 | Glutathione peroxidase 1                                    | 2  | 2  | 1.358        | 0.695 |
| C8KIL8 | Glutathion reductase delta8<br>alternative splicing variant | 7  | 7  | 1.021        | 0.736 |
| P04406 | Glyceraldehyde-3-phosphate<br>dehydrogenase                 | 16 | 16 | 0.538        | 1.322 |
| E9PCK0 | Hexokinase 1                                                | 6  | 6  | 0.545        | 0.587 |
| Q16775 | Hydroxyacylglutathione hydrolase                            | 6  | 6  | 0.960        | 0.999 |
| P00492 | Hypoxanthine-guanine<br>phosphoribosyltransferase           | 5  | 5  | 1.093        | 0.763 |
| E9PH51 | L-lactate dehydrogenase                                     | 11 | 13 | 0.543        | 0.789 |
| P07195 | L-lactate dehydrogenase B chain                             | 13 | 15 | 0.905        | 0.694 |
| Q01813 | 6-phosphofructokinase type C                                | 3  | 6  | 0.887        | 1.106 |
| P17858 | 6-phosphofructokinase, liver type                           | 5  | 8  | 1.209        | 0.987 |
| P08237 | 6-phosphofructokinase, muscle<br>type                       | 6  | 7  | 1.216        | 0.997 |
| P00558 | Phosphoglycerate kinase 1                                   | 22 | 27 | 0.678        | 0.865 |
| P18669 | Phosphoglycerate mutase                                     | 8  | 8  | 0.734        | 0.879 |
| P30613 | Pyruvate kinase isozymes R/L                                | 19 | 20 | 0.928        | 0.760 |
| P60174 | Triosephosphate isomerase                                   | 13 | 13 | 0.741        | 0.871 |
