# Supplementary material
Source: PubMed Central journal article supplement (PMC5083095)
Supplement: 10.1074_M115.057315_mcp.M115.057315-9.pdf [file 10.1074_M115.057315_mcp.M115.057315-9.pdf]

**Supplemental Table 6. Comparison of protein levels between adult RBCs and reticulocytes, and cord RBCs and reticulocytes.**  
See legend for Supplemental Table 4 for experimental details. Values show the ratio of protein levels between RBCs and reticulocytes in membrane (A) and cytosol (B) fractions.

**Supplemental Table 6A**

| Accession | Description                                                                                                   | Score  | Coverage | Unique Peptides | Peptides | PSMs | membrane fraction Adult RBC/retic | membrane fraction cord RBC/retic |
|-----------|---------------------------------------------------------------------------------------------------------------|--------|----------|-----------------|----------|------|-----------------------------------|----------------------------------|
| P31946    | 14-3-3 protein beta/alpha OS=Homo sapiens GN=YWHAB PE=1 SV=3 - [1433B_HUMAN]                                  | 50.55  | 34.96    | 3               | 8        | 15   | 1.173                             | 0.855                            |
| P62258    | 14-3-3 protein epsilon OS=Homo sapiens GN=YWHAE PE=1 SV=1 - [1433E_HUMAN]                                     | 77.85  | 38.82    | 9               | 12       | 22   | 0.700                             | 1.044                            |
| Q04917    | 14-3-3 protein eta OS=Homo sapiens GN=YWHAH PE=1 SV=4 - [1433F_HUMAN]                                         | 43.88  | 29.27    | 4               | 8        | 13   | 0.405                             | 0.294                            |
| P61981    | 14-3-3 protein gamma OS=Homo sapiens GN=YWHAG PE=1 SV=2 - [1433G_HUMAN]                                       | 65.13  | 40.49    | 7               | 11       | 19   | 0.548                             | 0.559                            |
| P27348    | 14-3-3 protein theta OS=Homo sapiens GN=YWHAQ PE=1 SV=1 - [1433T_HUMAN]                                       | 49.95  | 30.61    | 2               | 7        | 14   | 0.332                             | 0.391                            |
| P63104    | 14-3-3 protein zeta/delta OS=Homo sapiens GN=YWHAZ PE=1 SV=1 - [1433Z_HUMAN]                                  | 54.47  | 35.10    | 4               | 8        | 15   | 0.469                             | 0.772                            |
| P09543    | 2',3'-cyclic-nucleotide 3'-phosphodiesterase OS=Homo sapiens GN=CNP PE=1 SV=2 - [CN37_HUMAN]                  | 107.23 | 36.82    | 18              | 19       | 34   | 2.099                             | 1.759                            |
| P62333    | 26S protease regulatory subunit 10B OS=Homo sapiens GN=PSMC6 PE=1 SV=1 - [PRS10_HUMAN]                        | 69.71  | 27.76    | 11              | 11       | 22   | 1.395                             | 0.922                            |
| P62191    | 26S protease regulatory subunit 4 OS=Homo sapiens GN=PSMC1 PE=1 SV=1 - [PRS4_HUMAN]                           | 104.26 | 30.45    | 14              | 15       | 31   | 1.708                             | 0.892                            |
| P17980    | 26S protease regulatory subunit 6A OS=Homo sapiens GN=PSMC3 PE=1 SV=3 - [PRS6A_HUMAN]                         | 77.08  | 35.08    | 14              | 14       | 23   | 1.303                             | 0.835                            |
| P43686    | 26S protease regulatory subunit 6B OS=Homo sapiens GN=PSMC4 PE=1 SV=2 - [PRS6B_HUMAN]                         | 66.58  | 27.27    | 12              | 12       | 19   | 1.399                             | 0.817                            |
| P35998    | 26S protease regulatory subunit 7 OS=Homo sapiens GN=PSMC2 PE=1 SV=3 - [PRS7_HUMAN]                           | 173.63 | 47.34    | 20              | 20       | 49   | 1.480                             | 0.847                            |
| Q99460    | 26S proteasome non-ATPase regulatory subunit 1 OS=Homo sapiens GN=PSMD1 PE=1 SV=2 - [PSMD1_HUMAN]             | 144.55 | 29.17    | 25              | 25       | 44   | 1.271                             | 0.779                            |
| O00231    | 26S proteasome non-ATPase regulatory subunit 11 OS=Homo sapiens GN=PSMD11 PE=1 SV=3 - [PSD11_HUMAN]           | 79.96  | 34.60    | 14              | 14       | 25   | 1.219                             | 0.734                            |
| O00232    | 26S proteasome non-ATPase regulatory subunit 12 OS=Homo sapiens GN=PSMD12 PE=1 SV=3 - [PSD12_HUMAN]           | 89.37  | 28.73    | 15              | 15       | 27   | 0.833                             | 0.701                            |
| Q9UNM6    | 26S proteasome non-ATPase regulatory subunit 13 OS=Homo sapiens GN=PSMD13 PE=1 SV=2 - [PSD13_HUMAN]           | 84.10  | 31.91    | 13              | 13       | 26   | 1.135                             | 0.740                            |
| O00487    | 26S proteasome non-ATPase regulatory subunit 14 OS=Homo sapiens GN=PSMD14 PE=1 SV=1 - [PSDE_HUMAN]            | 46.17  | 15.81    | 6               | 6        | 15   | 0.851                             | 0.735                            |
| P55036    | 26S proteasome non-ATPase regulatory subunit 4 OS=Homo sapiens GN=PSMD4 PE=1 SV=1 - [PSMD4_HUMAN]             | 33.77  | 19.63    | 6               | 6        | 10   | 1.331                             | 0.749                            |
| Q15008    | 26S proteasome non-ATPase regulatory subunit 6 OS=Homo sapiens GN=PSMD6 PE=1 SV=1 - [PSMD6_HUMAN]             | 81.35  | 27.76    | 14              | 14       | 24   | 1.230                             | 0.732                            |
| P48556    | 26S proteasome non-ATPase regulatory subunit 8 OS=Homo sapiens GN=PSMD8 PE=1 SV=2 - [PSMD8_HUMAN]             | 38.56  | 14.29    | 7               | 7        | 13   | 1.021                             | 0.742                            |
| Q13442    | 28 kDa heat- and acid-stable phosphoprotein OS=Homo sapiens GN=PDAP1 PE=1 SV=1 - [HAP28_HUMAN]                | 54.27  | 50.28    | 8               | 8        | 15   | 0.115                             | 0.204                            |
| Q99714    | 3-hydroxyacyl-CoA dehydrogenase type-2 OS=Homo sapiens GN=HSD17B10 PE=1 SV=3 - [HCD2_HUMAN]                   | 31.97  | 27.97    | 5               | 5        | 9    | 0.234                             | 0.138                            |
| P42765    | 3-ketoacyl-CoA thiolase, mitochondrial OS=Homo sapiens GN=ACAA2 PE=1 SV=2 - [THIM_HUMAN]                      | 28.57  | 21.41    | 8               | 8        | 9    | 0.376                             | 0.171                            |
| Q96RE3    | 36 kDa muscleblind protein EXP36 OS=Homo sapiens GN=MBNL1 PE=2 SV=1 - [Q96RE3_HUMAN]                          | 5.74   | 7.01     | 2               | 2        | 2    | 0.114                             | 0.154                            |
| P49189    | 4-trimethylaminobutyraldehyde dehydrogenase OS=Homo sapiens GN=ALDH9A1 PE=1 SV=3 - [AL9A1_HUMAN]              | 12.92  | 5.87     | 3               | 3        | 4    | 0.186                             | 0.490                            |
| P46783    | 40S ribosomal protein S10 OS=Homo sapiens GN=RPS10 PE=1 SV=1 - [RS10_HUMAN]                                   | 25.40  | 24.24    | 4               | 4        | 8    | 0.157                             | 0.156                            |
| P62280    | 40S ribosomal protein S11 OS=Homo sapiens GN=RPS11 PE=1 SV=3 - [RS11_HUMAN]                                   | 28.21  | 21.52    | 5               | 5        | 9    | 0.112                             | 0.158                            |
| P25398    | 40S ribosomal protein S12 OS=Homo sapiens GN=RPS12 PE=1 SV=3 - [RS12_HUMAN]                                   | 16.43  | 21.97    | 3               | 3        | 5    | 0.223                             | 0.233                            |
| P62277    | 40S ribosomal protein S13 OS=Homo sapiens GN=RPS13 PE=1 SV=2 - [RS13_HUMAN]                                   | 31.70  | 35.10    | 7               | 7        | 10   | 0.146                             | 0.116                            |
| P62263    | 40S ribosomal protein S14 OS=Homo sapiens GN=RPS14 PE=1 SV=3 - [RS14_HUMAN]                                   | 24.03  | 23.84    | 4               | 4        | 7    | 0.222                             | 0.142                            |
| P62249    | 40S ribosomal protein S16 OS=Homo sapiens GN=RPS16 PE=1 SV=2 - [RS16_HUMAN]                                   | 23.57  | 29.45    | 6               | 6        | 8    | 0.050                             | 0.093                            |
| P0CW22    | 40S ribosomal protein S17-like OS=Homo sapiens GN=RPS17L PE=3 SV=1 - [RS17L_HUMAN]                            | 13.40  | 8.89     | 2               | 2        | 4    | 0.245                             | 0.262                            |
| P62269    | 40S ribosomal protein S18 OS=Homo sapiens GN=RPS18 PE=1 SV=3 - [RS18_HUMAN]                                   | 27.91  | 34.87    | 6               | 6        | 9    | 0.304                             | 0.159                            |
| P39019    | 40S ribosomal protein S19 OS=Homo sapiens GN=RPS19 PE=1 SV=2 - [RS19_HUMAN]                                   | 59.36  | 41.38    | 8               | 8        | 16   | 0.045                             | 0.099                            |
| P15880    | 40S ribosomal protein S2 OS=Homo sapiens GN=RPS2 PE=1 SV=2 - [RS2_HUMAN]                                      | 24.04  | 23.21    | 7               | 7        | 8    | 0.096                             | 0.129                            |
| P60866    | 40S ribosomal protein S20 OS=Homo sapiens GN=RPS20 PE=1 SV=1 - [RS20_HUMAN]                                   | 25.74  | 30.25    | 4               | 4        | 9    | 0.660                             | 0.303                            |
| Q8WVC2    | 40S ribosomal protein S21 OS=Homo sapiens GN=RPS21 PE=2 SV=1 - [Q8WVC2_HUMAN]                                 | 11.67  | 19.75    | 2               | 2        | 4    | 0.193                             | 0.175                            |
| P62266    | 40S ribosomal protein S23 OS=Homo sapiens GN=RPS23 PE=1 SV=3 - [RS23_HUMAN]                                   | 39.86  | 20.98    | 3               | 3        | 11   | 0.383                             | 0.248                            |
| P62851    | 40S ribosomal protein S25 OS=Homo sapiens GN=RPS25 PE=1 SV=1 - [RS25_HUMAN]                                   | 11.40  | 15.20    | 2               | 2        | 3    | 0.063                             | 0.113                            |
| P62854    | 40S ribosomal protein S26 OS=Homo sapiens GN=RPS26 PE=1 SV=3 - [RS26_HUMAN]                                   | 22.48  | 20.87    | 2               | 2        | 7    | 0.361                             | 0.229                            |
| P42677    | 40S ribosomal protein S27 OS=Homo sapiens GN=RPS27 PE=1 SV=3 - [RS27_HUMAN]                                   | 9.31   | 25.00    | 2               | 2        | 3    | 0.082                             | 0.132                            |
| P62857    | 40S ribosomal protein S28 OS=Homo sapiens GN=RPS28 PE=1 SV=1 - [RS28_HUMAN]                                   | 7.63   | 30.43    | 2               | 2        | 2    |                                   | 0.086                            |
| P23396    | 40S ribosomal protein S3 OS=Homo sapiens GN=RPS3 PE=1 SV=2 - [RS3_HUMAN]                                      | 63.99  | 45.27    | 11              | 11       | 19   | 0.119                             | 0.133                            |
| P61247    | 40S ribosomal protein S3a OS=Homo sapiens GN=RPS3A PE=1 SV=2 - [RS3A_HUMAN]                                   | 56.35  | 28.03    | 9               | 9        | 18   | 0.175                             | 0.121                            |
| P62701    | 40S ribosomal protein S4, X isoform OS=Homo sapiens GN=RPS4X PE=1 SV=2 - [RS4X_HUMAN]                         | 71.84  | 28.14    | 11              | 11       | 23   | 0.253                             | 0.176                            |
| P46782    | 40S ribosomal protein S5 OS=Homo sapiens GN=RPS5 PE=1 SV=4 - [RS5_HUMAN]                                      | 23.05  | 19.61    | 4               | 4        | 7    | 0.058                             | 0.129                            |
| P62753    | 40S ribosomal protein S6 OS=Homo sapiens GN=RPS6 PE=1 SV=1 - [RS6_HUMAN]                                      | 40.96  | 20.48    | 7               | 7        | 12   | 0.053                             | 0.122                            |
| P62081    | 40S ribosomal protein S7 OS=Homo sapiens GN=RPS7 PE=1 SV=1 - [RS7_HUMAN]                                      | 28.41  | 13.40    | 3               | 3        | 8    | 0.044                             | 0.109                            |
| P46781    | 40S ribosomal protein S9 OS=Homo sapiens GN=RPS9 PE=1 SV=3 - [RS9_HUMAN]                                      | 27.73  | 45.36    | 9               | 9        | 9    | 0.041                             | 0.108                            |
| Q13131    | 5'-AMP-activated protein kinase catalytic subunit alpha-1 OS=Homo sapiens GN=PRKAA1 PE=1 SV=4 - [AAPK1_HUMAN] | 7.63   | 3.58     | 2               | 2        | 2    | 0.053                             | 0.226                            |
| P17858    | 6-phosphofructokinase, liver type OS=Homo sapiens GN=PFKL PE=1 SV=6 - [K6PL_HUMAN]                            | 103.94 | 22.95    | 16              | 17       | 32   | 1.902                             | 1.204                            |
| P08237    | 6-phosphofructokinase, muscle type OS=Homo sapiens GN=PFKM PE=1 SV=2 - [K6PF_HUMAN]                           | 54.70  | 15.51    | 8               | 10       | 17   | 3.024                             | 2.147                            |
| F5H7U0    | 6-phosphogluconate dehydrogenase, decarboxylating OS=Homo sapiens GN=PGD PE=3 SV=1 - [F5H7U0_HUMAN]           | 55.22  | 21.69    | 11              | 11       | 17   | 0.138                             | 0.331                            |
| P10809    | 60 kDa heat shock protein, mitochondrial OS=Homo sapiens GN=HSPD1 PE=1 SV=2 - [CH60_HUMAN]                    | 219.85 | 37.00    | 22              | 22       | 70   | 0.206                             | 0.131                            |
| P05387    | 60S acidic ribosomal protein P2 OS=Homo sapiens GN=RPLP2 PE=1 SV=1 - [RLA2_HUMAN]                             | 24.28  | 24.35    | 3               | 3        | 6    | 0.123                             | 0.146                            |

|        |                                                                                                                          |         |       |    |    |     |       |       |
|--------|--------------------------------------------------------------------------------------------------------------------------|---------|-------|----|----|-----|-------|-------|
| P27635 | 60S ribosomal protein L10 OS=Homo sapiens GN=RPL10 PE=1 SV=4 - [RL10_HUMAN]                                              | 5.74    | 7.94  | 2  | 2  | 2   | 0.135 | 0.170 |
| P62906 | 60S ribosomal protein L10a OS=Homo sapiens GN=RPL10A PE=1 SV=2 - [RL10A_HUMAN]                                           | 19.53   | 27.19 | 5  | 5  | 6   | 0.228 | 0.148 |
| P30050 | 60S ribosomal protein L12 OS=Homo sapiens GN=RPL12 PE=1 SV=1 - [RL12_HUMAN]                                              | 23.65   | 47.88 | 6  | 6  | 7   | 0.132 | 0.147 |
| P26373 | 60S ribosomal protein L13 OS=Homo sapiens GN=RPL13 PE=1 SV=4 - [RL13_HUMAN]                                              | 62.25   | 36.02 | 9  | 9  | 16  | 0.111 | 0.119 |
| P40429 | 60S ribosomal protein L13a OS=Homo sapiens GN=RPL13A PE=1 SV=2 - [RL13A_HUMAN]                                           | 30.33   | 19.70 | 5  | 5  | 10  | 0.044 | 0.120 |
| P50914 | 60S ribosomal protein L14 OS=Homo sapiens GN=RPL14 PE=1 SV=4 - [RL14_HUMAN]                                              | 31.97   | 31.16 | 5  | 6  | 10  | 0.306 | 0.187 |
| P18621 | 60S ribosomal protein L17 OS=Homo sapiens GN=RPL17 PE=1 SV=3 - [RL17_HUMAN]                                              | 18.68   | 19.57 | 4  | 4  | 6   | 0.341 | 0.175 |
| Q07020 | 60S ribosomal protein L18 OS=Homo sapiens GN=RPL18 PE=1 SV=2 - [RL18_HUMAN]                                              | 10.49   | 20.21 | 3  | 3  | 3   | 0.208 | 0.223 |
| P84098 | 60S ribosomal protein L19 OS=Homo sapiens GN=RPL19 PE=1 SV=1 - [RL19_HUMAN]                                              | 23.18   | 16.33 | 3  | 4  | 8   | 0.332 | 0.177 |
| P46778 | 60S ribosomal protein L21 OS=Homo sapiens GN=RPL21 PE=1 SV=2 - [RL21_HUMAN]                                              | 8.26    | 13.75 | 3  | 3  | 3   | 0.305 | 0.193 |
| P62829 | 60S ribosomal protein L23 OS=Homo sapiens GN=RPL23 PE=1 SV=1 - [RL23_HUMAN]                                              | 16.74   | 27.14 | 3  | 3  | 5   | 0.083 | 0.116 |
| P62750 | 60S ribosomal protein L23a OS=Homo sapiens GN=RPL23A PE=1 SV=1 - [RL23A_HUMAN]                                           | 47.29   | 35.26 | 9  | 9  | 15  | 0.158 | 0.140 |
| P61254 | 60S ribosomal protein L26 OS=Homo sapiens GN=RPL26 PE=1 SV=1 - [RL26_HUMAN]                                              | 23.62   | 33.10 | 6  | 6  | 8   | 0.217 | 0.178 |
| P61353 | 60S ribosomal protein L27 OS=Homo sapiens GN=RPL27 PE=1 SV=2 - [RL27_HUMAN]                                              | 13.92   | 23.53 | 4  | 4  | 5   | 0.070 | 0.121 |
| P46779 | 60S ribosomal protein L28 OS=Homo sapiens GN=RPL28 PE=1 SV=3 - [RL28_HUMAN]                                              | 19.78   | 19.71 | 4  | 4  | 5   | 0.053 | 0.114 |
| P39023 | 60S ribosomal protein L3 OS=Homo sapiens GN=RPL3 PE=1 SV=2 - [RL3_HUMAN]                                                 | 12.09   | 9.18  | 4  | 4  | 4   | 0.151 | 0.180 |
| P62888 | 60S ribosomal protein L30 OS=Homo sapiens GN=RPL30 PE=1 SV=2 - [RL30_HUMAN]                                              | 18.61   | 44.35 | 5  | 5  | 6   | 0.149 | 0.122 |
| P49207 | 60S ribosomal protein L34 OS=Homo sapiens GN=RPL34 PE=1 SV=3 - [RL34_HUMAN]                                              | 19.50   | 34.19 | 5  | 5  | 6   | 0.124 | 0.146 |
| P42766 | 60S ribosomal protein L35 OS=Homo sapiens GN=RPL35 PE=1 SV=2 - [RL35_HUMAN]                                              | 29.35   | 32.52 | 5  | 6  | 10  | 0.250 | 0.159 |
| Q9Y3U8 | 60S ribosomal protein L36 OS=Homo sapiens GN=RPL36 PE=1 SV=3 - [RL36_HUMAN]                                              | 6.69    | 19.05 | 2  | 2  | 2   | 0.322 | 0.313 |
| P83881 | 60S ribosomal protein L36a OS=Homo sapiens GN=RPL36A PE=1 SV=2 - [RL36A_HUMAN]                                           | 15.62   | 25.47 | 4  | 4  | 5   | 0.202 | 0.147 |
| P36578 | 60S ribosomal protein L4 OS=Homo sapiens GN=RPL4 PE=1 SV=5 - [RL4_HUMAN]                                                 | 52.32   | 29.27 | 13 | 14 | 16  | 0.298 | 0.158 |
| Q02878 | 60S ribosomal protein L6 OS=Homo sapiens GN=RPL6 PE=1 SV=3 - [RL6_HUMAN]                                                 | 27.16   | 19.79 | 7  | 7  | 9   | 0.188 | 0.154 |
| P18124 | 60S ribosomal protein L7 OS=Homo sapiens GN=RPL7 PE=1 SV=1 - [RL7_HUMAN]                                                 | 39.74   | 26.61 | 7  | 7  | 11  | 0.109 | 0.128 |
| P62424 | 60S ribosomal protein L7a OS=Homo sapiens GN=RPL7A PE=1 SV=2 - [RL7A_HUMAN]                                              | 41.66   | 23.31 | 8  | 8  | 12  | 0.112 | 0.120 |
| P11021 | 78 kDa glucose-regulated protein OS=Homo sapiens GN=HSPA5 PE=1 SV=2 - [GRP78_HUMAN]                                      | 257.37  | 46.33 | 29 | 32 | 76  | 0.958 | 0.731 |
| D2K8Q1 | AAA domain containing 3A protein OS=Homo sapiens GN=ATAD3A PE=2 SV=1 - [D2K8Q1_HUMAN]                                    | 40.78   | 10.92 | 7  | 7  | 12  | 0.095 | 0.141 |
| Q2L6I2 | ABC50 protein OS=Homo sapiens GN=ABCF1 PE=2 SV=1 - [Q2L6I2_HUMAN]                                                        | 19.77   | 3.97  | 2  | 4  | 6   | 0.098 | 0.276 |
| P24752 | Acetyl-CoA acetyltransferase, mitochondrial OS=Homo sapiens GN=ACAT1 PE=1 SV=1 - [THIL_HUMAN]                            | 48.08   | 19.67 | 8  | 8  | 16  | 0.102 | 0.144 |
| Q92688 | Acidic leucine-rich nuclear phosphoprotein 32 family member B OS=Homo sapiens GN=ANP32B PE=1 SV=1 - [AN32B_HUMAN]        | 33.92   | 15.54 | 3  | 5  | 10  | 0.240 | 0.340 |
| P61160 | Actin-related protein 2 OS=Homo sapiens GN=ACTR2 PE=1 SV=1 - [ARP2_HUMAN]                                                | 53.89   | 9.39  | 3  | 4  | 20  | 0.327 | 0.639 |
| O15144 | Actin-related protein 2/3 complex subunit 2 OS=Homo sapiens GN=ARPC2 PE=1 SV=1 - [ARPC2_HUMAN]                           | 35.47   | 22.33 | 7  | 7  | 11  | 0.249 | 0.576 |
| P59998 | Actin-related protein 2/3 complex subunit 4 OS=Homo sapiens GN=ARPC4 PE=1 SV=3 - [ARPC4_HUMAN]                           | 16.58   | 21.43 | 4  | 4  | 5   | 0.239 | 0.558 |
| P60709 | Actin, cytoplasmic 1 OS=Homo sapiens GN=ACTB PE=1 SV=1 - [ACTB_HUMAN]                                                    | 1033.91 | 61.60 | 8  | 19 | 316 | 3.062 | 2.862 |
| Q9H845 | Acyl-CoA dehydrogenase family member 9, mitochondrial OS=Homo sapiens GN=ACAD9 PE=1 SV=1 - [ACAD9_HUMAN]                 | 15.45   | 8.21  | 5  | 5  | 5   | 0.081 | 0.116 |
| Q5JWV8 | Acyl-CoA synthetase long-chain family member 4 OS=Homo sapiens GN=ACSL4 PE=2 SV=1 - [Q5JWV8_HUMAN]                       | 47.09   | 17.16 | 9  | 10 | 14  | 1.297 | 2.011 |
| P13798 | Acylamino-acid-releasing enzyme OS=Homo sapiens GN=APEH PE=1 SV=4 - [ACPH_HUMAN]                                         | 220.03  | 25.14 | 20 | 20 | 64  | 2.444 | 2.618 |
| F5H737 | Adenosylhomocysteinase OS=Homo sapiens GN=AHCY PE=3 SV=1 - [F5H737_HUMAN]                                                | 22.09   | 17.08 | 7  | 7  | 7   | 0.405 | 1.415 |
| P00568 | Adenylate kinase isoenzyme 1 OS=Homo sapiens GN=AK1 PE=1 SV=3 - [KAD1_HUMAN]                                             | 7.07    | 10.31 | 2  | 2  | 2   | 0.322 | 0.371 |
| P30566 | Adenylosuccinate lyase OS=Homo sapiens GN=ADSL PE=1 SV=2 - [PUR8_HUMAN]                                                  | 43.69   | 19.01 | 9  | 9  | 13  | 6.929 | 5.910 |
| F5H6Z3 | Adenylyl cyclase-associated protein OS=Homo sapiens GN=CAP1 PE=3 SV=1 - [F5H6Z3_HUMAN]                                   | 37.85   | 15.93 | 7  | 7  | 12  | 0.379 | 0.904 |
| Q9HDC9 | Adipocyte plasma membrane-associated protein OS=Homo sapiens GN=APMAP PE=1 SV=2 - [APMAP_HUMAN]                          | 10.32   | 9.13  | 3  | 3  | 3   | 0.782 | 0.616 |
| Q9NVJ2 | ADP-ribosylation factor-like protein 8B OS=Homo sapiens GN=ARL8B PE=1 SV=1 - [ARL8B_HUMAN]                               | 24.44   | 19.89 | 4  | 4  | 7   | 0.034 | 0.197 |
| P05141 | ADP/ATP translocase 2 OS=Homo sapiens GN=SLC25A5 PE=1 SV=7 - [ADT2_HUMAN]                                                | 77.37   | 32.89 | 4  | 12 | 25  | 0.018 | 0.099 |
| P12236 | ADP/ATP translocase 3 OS=Homo sapiens GN=SLC25A6 PE=1 SV=4 - [ADT3_HUMAN]                                                | 63.62   | 29.53 | 2  | 10 | 21  | 0.283 | 0.175 |
| Q9Y4W6 | AFG3-like protein 2 OS=Homo sapiens GN=AFG3L2 PE=1 SV=2 - [AFG32_HUMAN]                                                  | 15.16   | 5.40  | 5  | 5  | 5   | 0.052 | 0.119 |
| P49588 | Alanyl-tRNA synthetase, cytoplasmic OS=Homo sapiens GN=AARS PE=1 SV=2 - [SYAC_HUMAN]                                     | 57.66   | 12.60 | 13 | 13 | 18  | 0.276 | 0.122 |
| Q8IZ83 | Aldehyde dehydrogenase family 16 member A1 OS=Homo sapiens GN=ALDH16A1 PE=1 SV=2 - [A16A1_HUMAN]                         | 62.69   | 15.84 | 11 | 11 | 17  | 4.559 | 2.774 |
| P01023 | Alpha-2-macroglobulin OS=Homo sapiens GN=A2M PE=1 SV=3 - [A2MG_HUMAN]                                                    | 40.35   | 7.80  | 11 | 11 | 13  | 0.066 | 0.101 |
| P61163 | Alpha-centractin OS=Homo sapiens GN=ACTR1A PE=1 SV=1 - [ACTZ_HUMAN]                                                      | 118.48  | 34.04 | 13 | 14 | 40  | 0.957 | 0.806 |
| P06733 | Alpha-enolase OS=Homo sapiens GN=ENO1 PE=1 SV=2 - [ENOA_HUMAN]                                                           | 19.53   | 13.13 | 5  | 5  | 6   | 0.113 | 0.307 |
| Q9NZD4 | Alpha-hemoglobin-stabilizing protein OS=Homo sapiens GN=AHSP PE=1 SV=1 - [AHSP_HUMAN]                                    | 19.47   | 30.39 | 3  | 3  | 6   | 0.073 | 0.101 |
| P54920 | Alpha-soluble NSF attachment protein OS=Homo sapiens GN=NAPA PE=1 SV=3 - [SNA_A_HUMAN]                                   | 42.96   | 30.17 | 7  | 7  | 12  | 0.658 | 0.609 |
| Q12904 | Aminoacyl tRNA synthase complex-interacting multifunctional protein 1 OS=Homo sapiens GN=AIMP1 PE=1 SV=2 - [AIMP1_HUMAN] | 8.62    | 9.62  | 2  | 2  | 2   | 0.100 | 0.123 |
| A8K6C4 | Aminolevulinate, delta-, synthase 2 OS=Homo sapiens GN=ALAS2 PE=2 SV=1 - [A8K6C4_HUMAN]                                  | 10.59   | 5.09  | 3  | 3  | 3   | 0.014 | 0.116 |
| Q10567 | AP-1 complex subunit beta-1 OS=Homo sapiens GN=AP1B1 PE=1 SV=2 - [AP1B1_HUMAN]                                           | 109.87  | 14.54 | 4  | 16 | 31  | 0.575 | 0.639 |

|        |                                                                                                                           |         |       |    |    |     |       |       |
|--------|---------------------------------------------------------------------------------------------------------------------------|---------|-------|----|----|-----|-------|-------|
| O95782 | AP-2 complex subunit alpha-1 OS=Homo sapiens GN=AP2A1 PE=1 SV=3 - [AP2A1_HUMAN]                                           | 267.81  | 37.36 | 38 | 38 | 84  | 0.501 | 0.544 |
| P63010 | AP-2 complex subunit beta OS=Homo sapiens GN=AP2B1 PE=1 SV=1 - [AP2B1_HUMAN]                                              | 139.41  | 22.95 | 12 | 24 | 42  | 0.665 | 0.596 |
| Q2M2I8 | AP2-associated protein kinase 1 OS=Homo sapiens GN=AAK1 PE=1 SV=3 - [AAK1_HUMAN]                                          | 12.50   | 3.75  | 3  | 3  | 4   | 0.173 | 0.239 |
| O95831 | Apoptosis-inducing factor 1, mitochondrial OS=Homo sapiens GN=AIFM1 PE=1 SV=1 - [AIFM1_HUMAN]                             | 26.76   | 9.79  | 5  | 6  | 8   | 0.080 | 0.091 |
| P52594 | Arf-GAP domain and FG repeats-containing protein 1 OS=Homo sapiens GN=AGFG1 PE=1 SV=2 - [AGFG1_HUMAN]                     | 24.28   | 11.39 | 4  | 6  | 8   | 0.309 | 0.279 |
| Q9ULH1 | Arf-GAP with SH3 domain, ANK repeat and PH domain-containing protein 1 OS=Homo sapiens GN=ASAP1 PE=1 SV=4 - [ASAP1_HUMAN] | 21.20   | 4.69  | 7  | 7  | 7   | 0.899 | 1.124 |
| P05089 | Arginase-1 OS=Homo sapiens GN=ARG1 PE=1 SV=2 - [ARGI1_HUMAN]                                                              | 109.60  | 33.85 | 9  | 10 | 33  | 1.163 | 1.785 |
| P78540 | Arginase-2, mitochondrial OS=Homo sapiens GN=ARG2 PE=1 SV=1 - [ARGI2_HUMAN]                                               | 25.59   | 16.38 | 5  | 5  | 7   | 0.025 | 0.016 |
| O43776 | Asparaginyl-tRNA synthetase, cytoplasmic OS=Homo sapiens GN=NARS PE=1 SV=1 - [SYNC_HUMAN]                                 | 19.32   | 13.14 | 6  | 6  | 6   | 0.233 | 0.230 |
| P00505 | Aspartate aminotransferase, mitochondrial OS=Homo sapiens GN=GOT2 PE=1 SV=3 - [AATM_HUMAN]                                | 79.35   | 26.51 | 13 | 13 | 22  | 0.062 | 0.143 |
| P14868 | Aspartyl-tRNA synthetase, cytoplasmic OS=Homo sapiens GN=DARS PE=1 SV=2 - [SYDC_HUMAN]                                    | 39.85   | 14.77 | 7  | 8  | 13  | 0.746 | 0.334 |
| B4DL14 | ATP synthase gamma chain OS=Homo sapiens GN=ATP5C1 PE=2 SV=1 - [B4DL14_HUMAN]                                             | 28.52   | 27.20 | 8  | 8  | 9   | 0.239 | 0.203 |
| P25705 | ATP synthase subunit alpha, mitochondrial OS=Homo sapiens GN=ATP5A1 PE=1 SV=1 - [ATPA_HUMAN]                              | 158.19  | 36.89 | 20 | 20 | 46  | 0.042 | 0.117 |
| P06576 | ATP synthase subunit beta, mitochondrial OS=Homo sapiens GN=ATP5B PE=1 SV=3 - [ATPB_HUMAN]                                | 136.58  | 37.24 | 16 | 16 | 40  | 0.202 | 0.160 |
| O75947 | ATP synthase subunit d, mitochondrial OS=Homo sapiens GN=ATP5H PE=1 SV=3 - [ATP5H_HUMAN]                                  | 29.71   | 37.89 | 7  | 7  | 10  | 0.020 | 0.148 |
| P30049 | ATP synthase subunit delta, mitochondrial OS=Homo sapiens GN=ATP5D PE=1 SV=2 - [ATPD_HUMAN]                               | 21.87   | 13.69 | 2  | 2  | 5   | 0.037 | 0.133 |
| P48047 | ATP synthase subunit O, mitochondrial OS=Homo sapiens GN=ATP5O PE=1 SV=1 - [ATPO_HUMAN]                                   | 56.84   | 53.05 | 12 | 12 | 16  | 0.051 | 0.146 |
| P18859 | ATP synthase-coupling factor 6, mitochondrial OS=Homo sapiens GN=ATP5J PE=1 SV=1 - [ATP5J_HUMAN]                          | 6.54    | 24.07 | 2  | 2  | 2   | 0.010 | 0.114 |
| Q5QNZ2 | ATP synthase, H+ transporting, mitochondrial F0 complex, subunit B1 OS=Homo sapiens GN=ATP5F1 PE=2 SV=1 - [Q5QNZ2_HUMAN]  | 16.27   | 14.36 | 3  | 3  | 5   | 0.230 | 0.226 |
| Q9NRK6 | ATP-binding cassette sub-family B member 10, mitochondrial OS=Homo sapiens GN=ABCB10 PE=1 SV=2 - [ABCB10_HUMAN]           | 77.57   | 18.29 | 14 | 14 | 21  | 0.175 | 0.203 |
| Q9NP58 | ATP-binding cassette sub-family B member 6, mitochondrial OS=Homo sapiens GN=ABCB6 PE=1 SV=1 - [ABCB6_HUMAN]              | 157.61  | 19.00 | 14 | 15 | 46  | 0.816 | 1.166 |
| P61221 | ATP-binding cassette sub-family E member 1 OS=Homo sapiens GN=ABCE1 PE=1 SV=1 - [ABCE1_HUMAN]                             | 35.09   | 12.69 | 8  | 8  | 10  | 0.578 | 0.401 |
| Q5STZ8 | ATP-binding cassette sub-family F (GCN20) member 1 (Fragment) OS=Homo sapiens GN=ABCF1 PE=2 SV=2 - [Q5STZ8_HUMAN]         | 19.46   | 9.71  | 2  | 4  | 6   | 0.084 | 0.273 |
| Q9UNQ0 | ATP-binding cassette sub-family G member 2 OS=Homo sapiens GN=ABCG2 PE=1 SV=3 - [ABCG2_HUMAN]                             | 23.83   | 4.27  | 3  | 3  | 7   | 2.204 | 2.023 |
| P53396 | ATP-citrate synthase OS=Homo sapiens GN=ACLY PE=1 SV=3 - [ACLY_HUMAN]                                                     | 357.14  | 33.51 | 12 | 37 | 109 | 1.350 | 2.482 |
| Q08211 | ATP-dependent RNA helicase A OS=Homo sapiens GN=DHX9 PE=1 SV=4 - [DHX9_HUMAN]                                             | 90.30   | 15.67 | 20 | 20 | 27  | 0.154 | 0.285 |
| Q7Z478 | ATP-dependent RNA helicase DHX29 OS=Homo sapiens GN=DHX29 PE=1 SV=2 - [DHX29_HUMAN]                                       | 5.95    | 1.39  | 2  | 2  | 2   | 0.575 | 0.512 |
| Q9UII2 | ATPase inhibitor, mitochondrial OS=Homo sapiens GN=ATPIF1 PE=1 SV=1 - [ATIF1_HUMAN]                                       | 88.19   | 24.53 | 5  | 5  | 24  | 0.113 | 0.262 |
| P51572 | B-cell receptor-associated protein 31 OS=Homo sapiens GN=BCAP31 PE=1 SV=3 - [BAP31_HUMAN]                                 | 12.56   | 10.57 | 3  | 3  | 4   | 0.164 | 0.138 |
| P02730 | Band 3 anion transport protein OS=Homo sapiens GN=SLC4A1 PE=1 SV=3 - [B3AT_HUMAN]                                         | 1578.29 | 32.05 | 27 | 27 | 481 | 3.826 | 3.604 |
| P50895 | Basal cell adhesion molecule OS=Homo sapiens GN=BCAM PE=1 SV=2 - [BCAM_HUMAN]                                             | 63.47   | 20.06 | 10 | 10 | 18  | 2.373 | 1.155 |
| Q54A51 | Basigin (Ok blood group), isoform CRA_a OS=Homo sapiens GN=hEMMPRIN PE=2 SV=1 - [Q54A51_HUMAN]                            | 80.31   | 43.49 | 11 | 11 | 26  | 0.954 | 1.260 |
| P35612 | Beta-adducin OS=Homo sapiens GN=ADD2 PE=1 SV=3 - [ADDB_HUMAN]                                                             | 440.34  | 41.74 | 10 | 32 | 135 | 4.433 | 3.571 |
| P07686 | Beta-hexosaminidase subunit beta OS=Homo sapiens GN=HEXB PE=1 SV=3 - [HEXB_HUMAN]                                         | 17.03   | 9.53  | 6  | 6  | 6   | 0.097 | 0.118 |
| P53004 | Biliverdin reductase A OS=Homo sapiens GN=BLVRA PE=1 SV=2 - [BIEA_HUMAN]                                                  | 6.22    | 4.73  | 2  | 2  | 2   | 1.807 | 1.315 |
| P78537 | Biogenesis of lysosome-related organelles complex 1 subunit 1 OS=Homo sapiens GN=BLOC1S1 PE=1 SV=2 - [BL1S1_HUMAN]        | 8.73    | 11.11 | 2  | 2  | 3   | 0.101 | 0.302 |
| P07738 | Bisphosphoglycerate mutase OS=Homo sapiens GN=BPGM PE=1 SV=2 - [PMGE_HUMAN]                                               | 39.66   | 27.03 | 6  | 6  | 13  | 0.436 | 1.850 |
| Q13867 | Bleomycin hydrolase OS=Homo sapiens GN=BLMH PE=1 SV=1 - [BLMH_HUMAN]                                                      | 20.08   | 13.63 | 5  | 5  | 6   | 1.040 | 1.722 |
| Q9NSY1 | BMP-2-inducible protein kinase OS=Homo sapiens GN=BMP2K PE=1 SV=2 - [BMP2K_HUMAN]                                         | 30.48   | 9.22  | 8  | 8  | 8   | 0.592 | 0.377 |
| P11586 | C-1-tetrahydrofolate synthase, cytoplasmic OS=Homo sapiens GN=MTHFD1 PE=1 SV=3 - [C1TC_HUMAN]                             | 299.99  | 32.19 | 33 | 33 | 91  | 0.531 | 0.475 |
| O14523 | C2 domain-containing protein 2-like OS=Homo sapiens GN=C2CD2L PE=1 SV=3 - [C2C2L_HUMAN]                                   | 15.93   | 3.97  | 3  | 3  | 5   | 2.247 | 1.979 |
| P27708 | CAD protein OS=Homo sapiens GN=CAD PE=1 SV=3 - [PYR1_HUMAN]                                                               | 18.19   | 2.25  | 5  | 5  | 5   | 0.386 | 0.329 |
| P62158 | Calmodulin OS=Homo sapiens GN=CALM1 PE=1 SV=2 - [CALM_HUMAN]                                                              | 45.04   | 38.26 | 7  | 7  | 14  | 0.690 | 0.737 |
| P27824 | Calnexin OS=Homo sapiens GN=CANX PE=1 SV=2 - [CALX_HUMAN]                                                                 | 75.29   | 21.11 | 15 | 15 | 23  | 0.633 | 0.814 |
| P04632 | Calpain small subunit 1 OS=Homo sapiens GN=CAPNS1 PE=1 SV=1 - [CPNS1_HUMAN]                                               | 5.48    | 4.85  | 2  | 2  | 2   | 0.557 | 1.199 |
| P07384 | Calpain-1 catalytic subunit OS=Homo sapiens GN=CAPN1 PE=1 SV=1 - [CAN1_HUMAN]                                             | 19.83   | 8.96  | 6  | 6  | 6   | 0.714 | 1.524 |
| O15484 | Calpain-5 OS=Homo sapiens GN=CAPN5 PE=1 SV=2 - [CAN5_HUMAN]                                                               | 13.03   | 4.84  | 3  | 3  | 4   | 2.957 | 1.726 |
| P27797 | Calreticulin OS=Homo sapiens GN=CALR PE=1 SV=1 - [CALR_HUMAN]                                                             | 193.71  | 42.93 | 19 | 19 | 60  | 0.537 | 0.601 |
| O43852 | Calumenin OS=Homo sapiens GN=CALU PE=1 SV=2 - [CALU_HUMAN]                                                                | 14.08   | 9.52  | 3  | 3  | 5   | 0.766 | 0.906 |
| P17612 | cAMP-dependent protein kinase catalytic subunit alpha OS=Homo sapiens GN=PRKACA PE=1 SV=2 - [KAPCA_HUMAN]                 | 75.54   | 21.94 | 9  | 9  | 22  | 1.676 | 2.908 |
| P10644 | cAMP-dependent protein kinase type I-alpha regulatory subunit OS=Homo sapiens GN=PRKAR1A PE=1 SV=1 - [KAP0_HUMAN]         | 96.02   | 37.01 | 15 | 15 | 27  | 2.008 | 3.164 |
| B1AK87 | Capping protein (Actin filament) muscle Z-line, beta OS=Homo sapiens GN=CAPZB PE=4 SV=1 - [B1AK87_HUMAN]                  | 31.87   | 19.62 | 6  | 6  | 10  | 0.982 | 0.819 |
| P00918 | Carbonic anhydrase 2 OS=Homo sapiens GN=CA2 PE=1 SV=2 - [CAH2_HUMAN]                                                      | 10.09   | 11.92 | 3  | 3  | 3   | 1.465 | 0.398 |
| P50416 | Carnitine O-palmitoyltransferase 1, liver isoform OS=Homo sapiens GN=CPT1A PE=1 SV=2 - [CPT1A_HUMAN]                      | 12.40   | 4.01  | 3  | 3  | 4   | 0.464 | 0.167 |
| P48729 | Casein kinase I isoform alpha OS=Homo sapiens GN=CSNK1A1 PE=1 SV=2 - [KC1A_HUMAN]                                         | 6.16    | 8.90  | 2  | 2  | 2   | 1.337 | 1.980 |
| P67870 | Casein kinase II subunit beta OS=Homo sapiens GN=CSNK2B PE=1 SV=1 - [CSK2B_HUMAN]                                         | 13.81   | 15.81 | 3  | 3  | 4   | 0.832 | 0.766 |

|        |                                                                                                                                               |        |       |    |    |     |        |       |
|--------|-----------------------------------------------------------------------------------------------------------------------------------------------|--------|-------|----|----|-----|--------|-------|
| P04040 | Catalase OS=Homo sapiens GN=CAT PE=1 SV=3 - [CATA_HUMAN]                                                                                      | 248.04 | 47.63 | 25 | 25 | 77  | 0.711  | 2.535 |
| P07339 | Cathepsin D OS=Homo sapiens GN=CTSD PE=1 SV=1 - [CATD_HUMAN]                                                                                  | 37.38  | 15.29 | 6  | 6  | 12  | 0.110  | 0.146 |
| P14091 | Cathepsin E OS=Homo sapiens GN=CTSE PE=1 SV=2 - [CATE_HUMAN]                                                                                  | 5.84   | 3.99  | 2  | 2  | 2   | 17.672 | 6.129 |
| Q9Y5K6 | CD2-associated protein OS=Homo sapiens GN=CD2AP PE=1 SV=1 - [CD2AP_HUMAN]                                                                     | 60.97  | 22.54 | 13 | 13 | 18  | 0.373  | 0.495 |
| B6EAT9 | CD44 OS=Homo sapiens PE=2 SV=1 - [B6EAT9_HUMAN]                                                                                               | 58.48  | 18.82 | 6  | 6  | 17  | 1.946  | 1.188 |
| B1AMW1 | CD58 antigen, (Lymphocyte function-associated antigen 3), isoform CRA_c OS=Homo sapiens GN=CD58 PE=4 SV=1 - [B1AMW1_HUMAN]                    | 14.55  | 7.50  | 2  | 2  | 4   | 1.477  | 1.175 |
| Q8N5K1 | CDGSH iron-sulfur domain-containing protein 2 OS=Homo sapiens GN=CISD2 PE=1 SV=1 - [CISD2_HUMAN]                                              | 69.48  | 40.00 | 6  | 6  | 18  | 0.943  | 1.517 |
| B7Z3E2 | cDNA FLJ50777, highly similar to Serine/threonine-protein phosphatase 6 (EC 3.1.3.16) OS=Homo sapiens PE=2 SV=1 - [B7Z3E2_HUMAN]              | 15.94  | 19.62 | 3  | 3  | 5   | 0.993  | 0.989 |
| B4DM63 | cDNA FLJ51245, highly similar to Actin-related protein 2/3 complex subunit 3 OS=Homo sapiens PE=2 SV=1 - [B4DM63_HUMAN]                       | 8.99   | 14.37 | 3  | 3  | 3   | 0.477  | 0.498 |
| B4DEW9 | cDNA FLJ52478, highly similar to Eukaryotic translation initiation factor 3 subunit 5 OS=Homo sapiens PE=2 SV=1 - [B4DEW9_HUMAN]              | 16.21  | 19.71 | 4  | 4  | 5   | 0.162  | 0.125 |
| B4DS57 | cDNA FLJ53176, highly similar to Nuclear autoantigenic sperm protein OS=Homo sapiens PE=2 SV=1 - [B4DS57_HUMAN]                               | 10.14  | 2.76  | 3  | 3  | 3   | 0.621  | 0.425 |
| B4DPJ6 | cDNA FLJ53635, highly similar to Homo sapiens tumor protein D52-like 2, transcript variant 6, mRNA OS=Homo sapiens PE=2 SV=1 - [B4DPJ6_HUMAN] | 7.99   | 11.04 | 2  | 2  | 2   | 0.676  | 1.507 |
| B4DW31 | cDNA FLJ54186, highly similar to Nuclear receptor-binding protein OS=Homo sapiens PE=2 SV=1 - [B4DW31_HUMAN]                                  | 5.97   | 5.63  | 2  | 2  | 2   | 0.500  | 0.647 |
| B4DZV5 | cDNA FLJ58820, highly similar to 55 kDa erythrocyte membrane protein (p55) OS=Homo sapiens PE=2 SV=1 - [B4DZV5_HUMAN]                         | 280.15 | 45.41 | 19 | 19 | 88  | 1.528  | 1.643 |
| Q8NBU8 | cDNA FLJ90737 fis, clone PLACE1010827, moderately similar to Membrane protein p24B OS=Homo sapiens PE=2 SV=1 - [Q8NBU8_HUMAN]                 | 6.14   | 9.04  | 2  | 2  | 2   | 0.925  | 1.156 |
| Q9NV96 | Cell cycle control protein 50A OS=Homo sapiens GN=TMEM30A PE=1 SV=1 - [CC50A_HUMAN]                                                           | 6.09   | 7.48  | 2  | 2  | 2   | 0.899  | 0.763 |
| P60953 | Cell division control protein 42 homolog OS=Homo sapiens GN=CDC42 PE=1 SV=2 - [CDC42_HUMAN]                                                   | 51.07  | 26.70 | 4  | 5  | 14  | 1.839  | 2.245 |
| B7ZAT2 | Chaperonin containing TCP1, subunit 2 (Beta), isoform CRA_c OS=Homo sapiens GN=CCT2 PE=2 SV=1 - [B7ZAT2_HUMAN]                                | 142.07 | 40.37 | 21 | 21 | 43  | 0.497  | 0.754 |
| B7Z4T9 | Chaperonin containing TCP1, subunit 7 (Eta), isoform CRA_c OS=Homo sapiens GN=CCT7 PE=2 SV=1 - [B7Z4T9_HUMAN]                                 | 209.47 | 51.50 | 26 | 26 | 64  | 0.626  | 0.849 |
| Q7LBR1 | Charged multivesicular body protein 1b OS=Homo sapiens GN=CHMP1B PE=1 SV=1 - [CHM1B_HUMAN]                                                    | 11.23  | 15.58 | 4  | 4  | 4   | 0.974  | 1.289 |
| O43633 | Charged multivesicular body protein 2a OS=Homo sapiens GN=CHMP2A PE=1 SV=1 - [CHM2A_HUMAN]                                                    | 22.99  | 22.97 | 6  | 6  | 6   | 0.775  | 0.855 |
| Q96FZ7 | Charged multivesicular body protein 6 OS=Homo sapiens GN=CHMP6 PE=1 SV=3 - [CHMP6_HUMAN]                                                      | 9.68   | 13.43 | 3  | 3  | 3   | 1.039  | 1.245 |
| Q9BWS9 | Chitinase domain-containing protein 1 OS=Homo sapiens GN=CHID1 PE=1 SV=1 - [CHID1_HUMAN]                                                      | 12.20  | 6.62  | 3  | 3  | 4   | 0.610  | 0.612 |
| B4DJV2 | Citrate synthase OS=Homo sapiens GN=CS PE=2 SV=1 - [B4DJV2_HUMAN]                                                                             | 57.93  | 20.09 | 9  | 9  | 18  | 0.157  | 0.183 |
| Q00610 | Clathrin heavy chain 1 OS=Homo sapiens GN=CLTC PE=1 SV=5 - [CLH1_HUMAN]                                                                       | 479.20 | 30.75 | 50 | 50 | 141 | 0.546  | 0.495 |
| P09497 | Clathrin light chain B OS=Homo sapiens GN=CLTB PE=1 SV=1 - [CLCB_HUMAN]                                                                       | 27.27  | 22.27 | 7  | 7  | 9   | 0.581  | 0.452 |
| P53621 | Coatomer subunit alpha OS=Homo sapiens GN=COPA PE=1 SV=2 - [COPA_HUMAN]                                                                       | 14.61  | 3.10  | 4  | 4  | 5   | 0.201  | 0.302 |
| P53618 | Coatomer subunit beta OS=Homo sapiens GN=COPB1 PE=1 SV=3 - [COPB_HUMAN]                                                                       | 6.72   | 2.83  | 2  | 2  | 2   | 0.203  | 0.382 |
| P48444 | Coatomer subunit delta OS=Homo sapiens GN=ARCN1 PE=1 SV=1 - [COPD_HUMAN]                                                                      | 20.50  | 13.11 | 7  | 7  | 7   | 0.415  | 0.526 |
| Q6P1N0 | Coiled-coil and C2 domain-containing protein 1A OS=Homo sapiens GN=CC2D1A PE=1 SV=1 - [C2D1A_HUMAN]                                           | 28.73  | 9.78  | 8  | 8  | 8   | 1.335  | 1.097 |
| Q96CT7 | Coiled-coil domain-containing protein 124 OS=Homo sapiens GN=CCDC124 PE=1 SV=1 - [CC124_HUMAN]                                                | 23.44  | 23.77 | 6  | 6  | 7   | 0.424  | 0.618 |
| Q2TAC2 | Coiled-coil domain-containing protein 57 OS=Homo sapiens GN=CCDC57 PE=2 SV=2 - [CCD57_HUMAN]                                                  | 5.24   | 1.64  | 2  | 2  | 2   | 5.260  | 3.003 |
| Q9Y2S6 | Coiled-coil domain-containing protein 72 OS=Homo sapiens GN=CCDC72 PE=1 SV=1 - [CCD72_HUMAN]                                                  | 10.19  | 25.00 | 2  | 2  | 3   | 0.162  | 0.407 |
| Q9NX63 | Coiled-coil-helix-coiled-coil-helix domain-containing protein 3, mitochondrial OS=Homo sapiens GN=CHCHD3 PE=1 SV=1 - [CHCH3_HUMAN]            | 33.70  | 31.72 | 8  | 8  | 10  | 0.050  | 0.112 |
| Q9BPX3 | Condensin complex subunit 3 OS=Homo sapiens GN=NCAPG PE=1 SV=1 - [CND3_HUMAN]                                                                 | 6.54   | 1.58  | 2  | 2  | 2   | 0.265  | 0.424 |
| A8K1H6 | COP9 constitutive photomorphogenic homolog subunit 8 (Arabidopsis), isoform CRA_b OS=Homo sapiens GN=COPS8 PE=2 SV=1 - [A8K1H6_HUMAN]         | 33.04  | 39.38 | 4  | 4  | 8   | 1.015  | 1.532 |
| Q13098 | COP9 signalosome complex subunit 1 OS=Homo sapiens GN=GPS1 PE=1 SV=4 - [CSN1_HUMAN]                                                           | 27.33  | 15.27 | 8  | 8  | 9   | 1.373  | 1.818 |
| P61201 | COP9 signalosome complex subunit 2 OS=Homo sapiens GN=COPS2 PE=1 SV=1 - [CSN2_HUMAN]                                                          | 22.42  | 12.19 | 7  | 7  | 8   | 0.990  | 1.706 |
| Q9BT78 | COP9 signalosome complex subunit 4 OS=Homo sapiens GN=COPS4 PE=1 SV=1 - [CSN4_HUMAN]                                                          | 36.26  | 25.37 | 9  | 9  | 11  | 1.344  | 1.800 |
| Q92905 | COP9 signalosome complex subunit 5 OS=Homo sapiens GN=COPS5 PE=1 SV=4 - [CSN5_HUMAN]                                                          | 31.04  | 19.76 | 6  | 6  | 10  | 0.840  | 1.693 |
| Q9H9Q2 | COP9 signalosome complex subunit 7b OS=Homo sapiens GN=COPS7B PE=1 SV=1 - [CSN7B_HUMAN]                                                       | 10.27  | 11.74 | 3  | 3  | 3   | 1.171  | 1.491 |
| Q04656 | Copper-transporting ATPase 1 OS=Homo sapiens GN=ATP7A PE=1 SV=3 - [ATP7A_HUMAN]                                                               | 34.29  | 5.33  | 8  | 8  | 11  | 1.103  | 0.754 |
| P36551 | Coproporphyrinogen-III oxidase, mitochondrial OS=Homo sapiens GN=CPOX PE=1 SV=3 - [HEM6_HUMAN]                                                | 132.50 | 39.21 | 16 | 16 | 43  | 0.125  | 0.153 |
| Q9ULV4 | Coronin-1C OS=Homo sapiens GN=CORO1C PE=1 SV=1 - [COR1C_HUMAN]                                                                                | 70.45  | 22.78 | 14 | 14 | 21  | 0.080  | 0.085 |
| Q9NRF8 | CTP synthase 2 OS=Homo sapiens GN=CTPS2 PE=1 SV=1 - [PYRG2_HUMAN]                                                                             | 6.39   | 3.58  | 2  | 2  | 2   | 0.646  | 0.635 |
| Q5T2B5 | Cullin 2 OS=Homo sapiens GN=CUL2 PE=2 SV=1 - [Q5T2B5_HUMAN]                                                                                   | 9.58   | 3.54  | 3  | 3  | 3   | 0.596  | 1.201 |
| Q13618 | Cullin-3 OS=Homo sapiens GN=CUL3 PE=1 SV=2 - [CUL3_HUMAN]                                                                                     | 52.68  | 16.15 | 13 | 13 | 15  | 0.630  | 1.095 |
| Q86VP6 | Cullin-associated NEDD8-dissociated protein 1 OS=Homo sapiens GN=CAND1 PE=1 SV=2 - [CAND1_HUMAN]                                              | 107.64 | 17.32 | 21 | 21 | 33  | 0.985  | 1.764 |
| A8MVQ3 | Cysteinyl-tRNA synthetase, isoform CRA_b OS=Homo sapiens GN=CARS PE=2 SV=1 - [A8MVQ3_HUMAN]                                                   | 7.75   | 2.44  | 2  | 2  | 2   | 0.079  | 0.206 |
| P31930 | Cytochrome b-c1 complex subunit 1, mitochondrial OS=Homo sapiens GN=UQCRC1 PE=1 SV=3 - [QCR1_HUMAN]                                           | 33.19  | 14.58 | 6  | 6  | 9   | 0.212  | 0.252 |
| P22695 | Cytochrome b-c1 complex subunit 2, mitochondrial OS=Homo sapiens GN=UQCRC2 PE=1 SV=3 - [QCR2_HUMAN]                                           | 63.53  | 28.48 | 11 | 11 | 20  | 0.108  | 0.157 |
| P07919 | Cytochrome b-c1 complex subunit 6, mitochondrial OS=Homo sapiens GN=UQCRH PE=1 SV=2 - [QCR6_HUMAN]                                            | 6.37   | 16.48 | 2  | 2  | 2   | 0.033  | 0.178 |
| P47985 | Cytochrome b-c1 complex subunit Rieske, mitochondrial OS=Homo sapiens GN=UQCRFS1 PE=1 SV=2 - [UCRI_HUMAN]                                     | 13.54  | 11.31 | 3  | 3  | 4   | 0.161  | 0.218 |
| P13073 | Cytochrome c oxidase subunit 4 isoform 1, mitochondrial OS=Homo sapiens GN=COX4I1 PE=1 SV=1 - [COX41_HUMAN]                                   | 21.24  | 21.30 | 4  | 4  | 6   | 0.235  | 0.251 |
| P20674 | Cytochrome c oxidase subunit 5A, mitochondrial OS=Homo sapiens GN=COX5A PE=1 SV=2 - [COX5A_HUMAN]                                             | 11.99  | 14.67 | 3  | 3  | 4   | 0.061  | 0.158 |
| P10606 | Cytochrome c oxidase subunit 5B, mitochondrial OS=Homo sapiens GN=COX5B PE=1 SV=2 - [COX5B_HUMAN]                                             | 15.23  | 24.03 | 4  | 4  | 5   | 0.055  | 0.126 |

|        |                                                                                                                           |        |       |    |    |     |       |       |
|--------|---------------------------------------------------------------------------------------------------------------------------|--------|-------|----|----|-----|-------|-------|
| P09669 | Cytochrome c oxidase subunit 6C OS=Homo sapiens GN=COX6C PE=1 SV=2 - [COX6C_HUMAN]                                        | 20.71  | 12.00 | 2  | 2  | 5   | 0.141 | 0.199 |
| P08574 | Cytochrome c1, heme protein, mitochondrial OS=Homo sapiens GN=CYC1 PE=1 SV=3 - [CY1_HUMAN]                                | 6.10   | 6.15  | 2  | 2  | 2   | 0.040 | 0.159 |
| Q8IU18 | Cytokine receptor-like factor 3 OS=Homo sapiens GN=CRLF3 PE=1 SV=2 - [CRLF3_HUMAN]                                        | 6.88   | 4.30  | 2  | 2  | 2   | 0.921 | 1.660 |
| Q14008 | Cytoskeleton-associated protein 5 OS=Homo sapiens GN=CKAP5 PE=1 SV=3 - [CKAP5_HUMAN]                                      | 18.22  | 3.00  | 5  | 5  | 5   | 2.164 | 1.202 |
| P28838 | Cytosol aminopeptidase OS=Homo sapiens GN=LAP3 PE=1 SV=3 - [AMPL_HUMAN]                                                   | 17.75  | 10.21 | 5  | 5  | 5   | 0.208 | 0.222 |
| Q58WW2 | DDB1- and CUL4-associated factor 6 OS=Homo sapiens GN=DCAF6 PE=1 SV=1 - [DCAF6_HUMAN]                                     | 6.47   | 2.21  | 2  | 2  | 2   | 0.588 | 1.118 |
| Q14UF5 | Decay-accelerating factor splicing variant 2 OS=Homo sapiens GN=DAF PE=2 SV=1 - [Q14UF5_HUMAN]                            | 68.26  | 22.25 | 11 | 11 | 22  | 2.113 | 2.026 |
| P54886 | Delta-1-pyrroline-5-carboxylate synthase OS=Homo sapiens GN=ALDH18A1 PE=1 SV=2 - [P5CS_HUMAN]                             | 12.26  | 6.67  | 4  | 4  | 4   | 0.446 | 0.350 |
| B7Z3I9 | Delta-aminolevulinic acid dehydratase OS=Homo sapiens PE=2 SV=1 - [B7Z3I9_HUMAN]                                          | 81.72  | 28.12 | 8  | 8  | 25  | 1.867 | 3.188 |
| Q13011 | Delta(3,5)-Delta(2,4)-dienoyl-CoA isomerase, mitochondrial OS=Homo sapiens GN=ECH1 PE=1 SV=2 - [ECH1_HUMAN]               | 50.81  | 25.61 | 9  | 9  | 15  | 0.060 | 0.107 |
| Q08495 | Dematin OS=Homo sapiens GN=EPB49 PE=1 SV=3 - [DEMA_HUMAN]                                                                 | 551.59 | 54.57 | 20 | 20 | 170 | 2.988 | 3.044 |
| Q96JH7 | Deubiquitinating protein VCIPI135 OS=Homo sapiens GN=VCIPI1 PE=1 SV=2 - [VCIPI1_HUMAN]                                    | 6.52   | 1.80  | 2  | 2  | 2   | 0.163 | 0.180 |
| F5H4I0 | Dihydrolipoyl dehydrogenase OS=Homo sapiens GN=DLD PE=3 SV=1 - [F5H4I0_HUMAN]                                             | 31.95  | 14.60 | 6  | 6  | 10  | 0.178 | 0.106 |
| P36957 | Dihydrolipoyllysine-residue succinyltransferase OS=Homo sapiens GN=DLST PE=1 SV=4 - [ODO2_HUMAN]                          | 55.30  | 22.52 | 10 | 10 | 16  | 0.068 | 0.162 |
| Q9P265 | Disco-interacting protein 2 homolog B OS=Homo sapiens GN=DIP2B PE=1 SV=3 - [DIP2B_HUMAN]                                  | 6.46   | 1.14  | 2  | 2  | 2   | 1.268 | 0.780 |
| Q9Y4D1 | Disheveled-associated activator of morphogenesis 1 OS=Homo sapiens GN=DAAM1 PE=1 SV=2 - [DAAM1_HUMAN]                     | 9.80   | 2.60  | 3  | 3  | 3   | 2.362 | 2.697 |
| Q16531 | DNA damage-binding protein 1 OS=Homo sapiens GN=DDB1 PE=1 SV=1 - [DDB1_HUMAN]                                             | 63.63  | 17.19 | 18 | 18 | 21  | 0.506 | 0.719 |
| Q92878 | DNA repair protein RAD50 OS=Homo sapiens GN=RAD50 PE=1 SV=1 - [RAD50_HUMAN]                                               | 6.90   | 1.14  | 2  | 2  | 2   | 0.394 | 0.258 |
| P16989 | DNA-binding protein A OS=Homo sapiens GN=CSDA PE=1 SV=4 - [DBPA_HUMAN]                                                    | 19.82  | 15.32 | 2  | 4  | 6   | 0.883 | 0.511 |
| P25685 | DnaJ homolog subfamily B member 1 OS=Homo sapiens GN=DNAJB1 PE=1 SV=4 - [DNJB1_HUMAN]                                     | 37.89  | 25.00 | 8  | 9  | 12  | 0.758 | 0.997 |
| Q9UBS4 | DnaJ homolog subfamily B member 11 OS=Homo sapiens GN=DNAJB11 PE=1 SV=1 - [DNJB11_HUMAN]                                  | 8.76   | 9.22  | 3  | 3  | 3   | 0.592 | 0.641 |
| Q9UDY4 | DnaJ homolog subfamily B member 4 OS=Homo sapiens GN=DNAJB4 PE=1 SV=1 - [DNJB4_HUMAN]                                     | 8.90   | 9.79  | 2  | 3  | 3   | 1.091 | 1.129 |
| Q9NVH1 | DnaJ homolog subfamily C member 11 OS=Homo sapiens GN=DNAJC11 PE=1 SV=2 - [DNJC11_HUMAN]                                  | 9.66   | 4.83  | 3  | 3  | 3   | 0.137 | 0.155 |
| Q9H3Z4 | DnaJ homolog subfamily C member 5 OS=Homo sapiens GN=DNAJC5 PE=1 SV=1 - [DNJC5_HUMAN]                                     | 16.68  | 19.19 | 3  | 3  | 5   | 0.370 | 0.566 |
| O75937 | DnaJ homolog subfamily C member 8 OS=Homo sapiens GN=DNAJC8 PE=1 SV=2 - [DNJC8_HUMAN]                                     | 5.94   | 6.32  | 2  | 2  | 2   | 0.205 | 0.219 |
| O60762 | Dolichol-phosphate mannosyltransferase OS=Homo sapiens GN=DPM1 PE=1 SV=1 - [DPM1_HUMAN]                                   | 5.91   | 5.77  | 2  | 2  | 2   | 0.159 | 0.292 |
| P04843 | Dolichyl-diphosphooligosaccharide--protein glycosyltransferase subunit 1 OS=Homo sapiens GN=RPN1 PE=1 SV=1 - [RPN1_HUMAN] | 29.12  | 12.52 | 8  | 8  | 9   | 0.392 | 0.296 |
| P49959 | Double-strand break repair protein MRE11A OS=Homo sapiens GN=MRE11A PE=1 SV=3 - [MRE11_HUMAN]                             | 9.34   | 4.52  | 3  | 3  | 3   | 0.162 | 0.178 |
| P46734 | Dual specificity mitogen-activated protein kinase kinase 3 OS=Homo sapiens GN=MAP2K3 PE=1 SV=2 - [MP2K3_HUMAN]            | 34.68  | 20.17 | 7  | 7  | 10  | 0.276 | 0.352 |
| Q5T1I6 | Dynactin 3 (P22) (Fragment) OS=Homo sapiens GN=DCTN3 PE=2 SV=1 - [Q5T1I6_HUMAN]                                           | 17.18  | 16.15 | 3  | 3  | 5   | 1.146 | 0.821 |
| Q13561 | Dynactin subunit 2 OS=Homo sapiens GN=DCTN2 PE=1 SV=4 - [DCTN2_HUMAN]                                                     | 80.74  | 39.90 | 14 | 14 | 23  | 1.111 | 0.905 |
| O60313 | Dynamamin-like 120 kDa protein, mitochondrial OS=Homo sapiens GN=OPA1 PE=1 SV=3 - [OPA1_HUMAN]                            | 23.45  | 6.56  | 7  | 7  | 7   | 0.055 | 0.130 |
| Q5XPI4 | E3 ubiquitin-protein ligase RNF123 OS=Homo sapiens GN=RNF123 PE=1 SV=1 - [RN123_HUMAN]                                    | 52.11  | 7.84  | 11 | 11 | 17  | 0.542 | 1.194 |
| Q5T4S7 | E3 ubiquitin-protein ligase UBR4 OS=Homo sapiens GN=UBR4 PE=1 SV=1 - [UBR4_HUMAN]                                         | 244.45 | 11.02 | 56 | 56 | 74  | 1.028 | 0.879 |
| Q14258 | E3 ubiquitin/ISG15 ligase TRIM25 OS=Homo sapiens GN=TRIM25 PE=1 SV=2 - [TRI25_HUMAN]                                      | 17.68  | 8.89  | 5  | 5  | 5   | 0.858 | 0.539 |
| Q15075 | Early endosome antigen 1 OS=Homo sapiens GN=EEA1 PE=1 SV=2 - [EEA1_HUMAN]                                                 | 9.49   | 2.91  | 2  | 3  | 3   | 1.266 | 0.959 |
| Q93070 | Ecto-ADP-ribosyltransferase 4 OS=Homo sapiens GN=ART4 PE=2 SV=2 - [NAR4_HUMAN]                                            | 9.46   | 7.96  | 3  | 3  | 3   | 3.086 | 3.262 |
| Q4VBZ6 | EEF1D protein OS=Homo sapiens GN=EEF1D PE=1 SV=1 - [Q4VBZ6_HUMAN]                                                         | 47.62  | 25.68 | 6  | 7  | 15  | 0.218 | 0.186 |
| Q8N3D4 | EH domain-binding protein 1-like protein 1 OS=Homo sapiens GN=EHBP1L1 PE=1 SV=2 - [EH1L1_HUMAN]                           | 37.16  | 6.17  | 6  | 6  | 10  | 1.851 | 1.183 |
| Q9H4M9 | EH domain-containing protein 1 OS=Homo sapiens GN=EHD1 PE=1 SV=2 - [EHD1_HUMAN]                                           | 70.58  | 27.72 | 16 | 16 | 22  | 0.763 | 0.472 |
| P38117 | Electron transfer flavoprotein subunit beta OS=Homo sapiens GN=ETFBE1 PE=1 SV=3 - [ETFBE1_HUMAN]                          | 54.60  | 32.94 | 9  | 9  | 16  | 0.077 | 0.086 |
| P68104 | Elongation factor 1-alpha 1 OS=Homo sapiens GN=EEF1A1 PE=1 SV=1 - [EF1A1_HUMAN]                                           | 183.28 | 32.47 | 16 | 16 | 58  | 0.096 | 0.168 |
| P24534 | Elongation factor 1-beta OS=Homo sapiens GN=EEF1B2 PE=1 SV=3 - [EF1B_HUMAN]                                               | 16.49  | 10.22 | 2  | 3  | 5   | 0.039 | 0.076 |
| P26641 | Elongation factor 1-gamma OS=Homo sapiens GN=EEF1G PE=1 SV=3 - [EF1G_HUMAN]                                               | 94.60  | 21.51 | 14 | 14 | 29  | 0.189 | 0.140 |
| P13639 | Elongation factor 2 OS=Homo sapiens GN=EEF2 PE=1 SV=4 - [EF2_HUMAN]                                                       | 87.71  | 17.83 | 16 | 17 | 27  | 0.256 | 0.241 |
| P49411 | Elongation factor Tu, mitochondrial OS=Homo sapiens GN=TUFM PE=1 SV=2 - [EFTU_HUMAN]                                      | 72.10  | 32.52 | 13 | 13 | 20  | 0.234 | 0.216 |
| P50402 | Emerin OS=Homo sapiens GN=EMD PE=1 SV=1 - [EMD_HUMAN]                                                                     | 18.19  | 11.81 | 3  | 3  | 5   | 0.613 | 0.546 |
| O94919 | Endonuclease domain-containing 1 protein OS=Homo sapiens GN=ENDOD1 PE=1 SV=2 - [ENDD1_HUMAN]                              | 44.87  | 16.20 | 7  | 7  | 14  | 1.540 | 1.475 |
| P30040 | Endoplasmic reticulum resident protein 29 OS=Homo sapiens GN=ERP29 PE=1 SV=4 - [ERP29_HUMAN]                              | 45.80  | 29.89 | 8  | 8  | 14  | 0.688 | 0.688 |
| Q9BS26 | Endoplasmic reticulum resident protein 44 OS=Homo sapiens GN=ERP44 PE=1 SV=1 - [ERP44_HUMAN]                              | 44.63  | 19.21 | 8  | 8  | 14  | 1.467 | 1.327 |
| Q9Y282 | Endoplasmic reticulum-Golgi intermediate compartment protein 3 OS=Homo sapiens GN=ERGIC3 PE=1 SV=1 - [ERGIC3_HUMAN]       | 15.07  | 11.23 | 4  | 4  | 5   | 0.720 | 0.994 |
| P14625 | Endoplasmin OS=Homo sapiens GN=HSP90B1 PE=1 SV=1 - [ENPL_HUMAN]                                                           | 182.71 | 29.89 | 28 | 29 | 55  | 0.723 | 0.804 |
| O60869 | Endothelial differentiation-related factor 1 OS=Homo sapiens GN=EDF1 PE=1 SV=1 - [EDF1_HUMAN]                             | 10.40  | 11.49 | 2  | 2  | 3   | 0.235 | 0.204 |
| P42126 | Enoyl-CoA delta isomerase 1, mitochondrial OS=Homo sapiens GN=ECI1 PE=1 SV=1 - [ECI1_HUMAN]                               | 8.32   | 10.93 | 3  | 3  | 3   | 0.084 | 0.169 |
| Q4KKX0 | EPB42 protein OS=Homo sapiens GN=EPB42 PE=2 SV=1 - [Q4KKX0_HUMAN]                                                         | 798.90 | 41.20 | 31 | 31 | 247 | 4.086 | 4.011 |
| B1AUU8 | Epidermal growth factor receptor pathway substrate 15 OS=Homo sapiens GN=EPS15 PE=4 SV=1 - [B1AUU8_HUMAN]                 | 18.14  | 5.64  | 5  | 5  | 6   | 0.634 | 0.617 |

|        |                                                                                                                                  |        |       |    |    |     |       |       |
|--------|----------------------------------------------------------------------------------------------------------------------------------|--------|-------|----|----|-----|-------|-------|
| P07099 | Epoxide hydrolase 1 OS=Homo sapiens GN=EPHX1 PE=1 SV=1 - [HYEP_HUMAN]                                                            | 6.02   | 3.96  | 2  | 2  | 2   | 0.541 | 0.477 |
| A2RRF3 | EPS15L1 protein OS=Homo sapiens GN=EPS15L1 PE=2 SV=1 - [A2RRF3_HUMAN]                                                            | 13.87  | 4.77  | 4  | 4  | 4   | 0.703 | 0.642 |
| Q9Y6I3 | Epsin-1 OS=Homo sapiens GN=EPN1 PE=1 SV=2 - [EPN1_HUMAN]                                                                         | 8.66   | 4.51  | 3  | 3  | 3   | 0.552 | 0.761 |
| Q99808 | Equilibrative nucleoside transporter 1 OS=Homo sapiens GN=SLC29A1 PE=1 SV=3 - [S29A1_HUMAN]                                      | 96.18  | 15.35 | 9  | 9  | 26  | 1.651 | 1.596 |
| O75477 | Erlin-1 OS=Homo sapiens GN=ERLIN1 PE=1 SV=1 - [ERLN1_HUMAN]                                                                      | 22.55  | 17.92 | 3  | 6  | 7   | 0.452 | 0.557 |
| Q96PL5 | Erythroid membrane-associated protein OS=Homo sapiens GN=ERMAP PE=1 SV=1 - [ERMAP_HUMAN]                                         | 89.80  | 21.47 | 10 | 10 | 29  | 3.127 | 2.423 |
| Q53GQ0 | Estradiol 17-beta-dehydrogenase 12 OS=Homo sapiens GN=HSD17B12 PE=1 SV=2 - [DHB12_HUMAN]                                         | 24.12  | 15.06 | 4  | 4  | 6   | 0.729 | 0.887 |
| P60842 | Eukaryotic initiation factor 4A-I OS=Homo sapiens GN=EIF4A1 PE=1 SV=1 - [IF4A1_HUMAN]                                            | 38.24  | 20.69 | 3  | 8  | 11  | 0.748 | 0.416 |
| P38919 | Eukaryotic initiation factor 4A-III OS=Homo sapiens GN=EIF4A3 PE=1 SV=4 - [IF4A3_HUMAN]                                          | 16.15  | 12.41 | 2  | 4  | 5   | 0.166 | 0.634 |
| P62495 | Eukaryotic peptide chain release factor subunit 1 OS=Homo sapiens GN=ETF1 PE=1 SV=3 - [ERF1_HUMAN]                               | 46.25  | 20.59 | 9  | 9  | 16  | 0.182 | 0.401 |
| P05198 | Eukaryotic translation initiation factor 2 subunit 1 OS=Homo sapiens GN=EIF2S1 PE=1 SV=3 - [IF2A_HUMAN]                          | 46.34  | 33.33 | 11 | 11 | 14  | 0.255 | 0.486 |
| P20042 | Eukaryotic translation initiation factor 2 subunit 2 OS=Homo sapiens GN=EIF2S2 PE=1 SV=2 - [IF2B_HUMAN]                          | 52.47  | 35.44 | 11 | 12 | 16  | 0.284 | 0.648 |
| P41091 | Eukaryotic translation initiation factor 2 subunit 3 OS=Homo sapiens GN=EIF2S3 PE=1 SV=3 - [IF2G_HUMAN]                          | 55.15  | 27.75 | 11 | 11 | 17  | 0.208 | 0.617 |
| Q14152 | Eukaryotic translation initiation factor 3 subunit A OS=Homo sapiens GN=EIF3A PE=1 SV=1 - [EIF3A_HUMAN]                          | 71.84  | 13.31 | 20 | 20 | 24  | 0.276 | 0.176 |
| P60228 | Eukaryotic translation initiation factor 3 subunit E OS=Homo sapiens GN=EIF3E PE=1 SV=1 - [EIF3E_HUMAN]                          | 12.64  | 5.62  | 3  | 3  | 4   | 0.184 | 0.148 |
| O75821 | Eukaryotic translation initiation factor 3 subunit G OS=Homo sapiens GN=EIF3G PE=1 SV=2 - [EIF3G_HUMAN]                          | 11.81  | 7.81  | 2  | 2  | 3   | 0.191 | 0.156 |
| O15372 | Eukaryotic translation initiation factor 3 subunit H OS=Homo sapiens GN=EIF3H PE=1 SV=1 - [EIF3H_HUMAN]                          | 29.80  | 17.05 | 6  | 6  | 8   | 0.054 | 0.076 |
| Q13347 | Eukaryotic translation initiation factor 3 subunit I OS=Homo sapiens GN=EIF3I PE=1 SV=1 - [EIF3I_HUMAN]                          | 26.59  | 14.15 | 5  | 5  | 8   | 0.122 | 0.122 |
| O75822 | Eukaryotic translation initiation factor 3 subunit J OS=Homo sapiens GN=EIF3J PE=1 SV=2 - [EIF3J_HUMAN]                          | 72.51  | 24.03 | 9  | 9  | 21  | 0.184 | 0.435 |
| Q9Y262 | Eukaryotic translation initiation factor 3 subunit L OS=Homo sapiens GN=EIF3L PE=1 SV=1 - [EIF3L_HUMAN]                          | 21.81  | 9.22  | 5  | 6  | 7   | 0.072 | 0.132 |
| P06730 | Eukaryotic translation initiation factor 4E OS=Homo sapiens GN=EIF4E PE=1 SV=2 - [IF4E_HUMAN]                                    | 16.61  | 18.43 | 4  | 4  | 5   | 0.227 | 0.365 |
| P55010 | Eukaryotic translation initiation factor 5 OS=Homo sapiens GN=EIF5 PE=1 SV=2 - [IF5_HUMAN]                                       | 19.43  | 12.76 | 5  | 5  | 6   | 0.274 | 0.484 |
| P63241 | Eukaryotic translation initiation factor 5A-1 OS=Homo sapiens GN=EIF5A PE=1 SV=2 - [IF5A1_HUMAN]                                 | 25.18  | 35.71 | 6  | 6  | 8   | 0.168 | 0.405 |
| O60841 | Eukaryotic translation initiation factor 5B OS=Homo sapiens GN=EIF5B PE=1 SV=4 - [IF2P_HUMAN]                                    | 9.63   | 1.80  | 2  | 3  | 3   | 0.090 | 0.161 |
| Q9BSJ8 | Extended synaptotagmin-1 OS=Homo sapiens GN=ESYT1 PE=1 SV=1 - [ESYT1_HUMAN]                                                      | 30.75  | 7.61  | 8  | 8  | 9   | 0.347 | 0.356 |
| A0FGR8 | Extended synaptotagmin-2 OS=Homo sapiens GN=ESYT2 PE=1 SV=1 - [ESYT2_HUMAN]                                                      | 16.92  | 4.45  | 4  | 4  | 5   | 0.748 | 0.734 |
| P15311 | Ezrin OS=Homo sapiens GN=EZR PE=1 SV=4 - [EZRI_HUMAN]                                                                            | 252.46 | 38.57 | 18 | 31 | 78  | 0.390 | 0.644 |
| P52907 | F-actin-capping protein subunit alpha-1 OS=Homo sapiens GN=CAPZA1 PE=1 SV=3 - [CAZA1_HUMAN]                                      | 30.88  | 22.03 | 5  | 6  | 10  | 0.725 | 0.998 |
| Q92945 | Far upstream element-binding protein 2 OS=Homo sapiens GN=KHSRP PE=1 SV=4 - [FUBP2_HUMAN]                                        | 10.07  | 4.64  | 2  | 3  | 3   | 0.375 | 0.110 |
| P49327 | Fatty acid synthase OS=Homo sapiens GN=FASN PE=1 SV=3 - [FAS_HUMAN]                                                              | 299.76 | 23.62 | 54 | 54 | 92  | 0.230 | 0.766 |
| Q86UX7 | Fermitin family homolog 3 OS=Homo sapiens GN=FERMT3 PE=1 SV=1 - [URP2_HUMAN]                                                     | 24.14  | 9.00  | 5  | 5  | 7   | 0.238 | 0.442 |
| P02794 | Ferritin heavy chain OS=Homo sapiens GN=FTH1 PE=1 SV=2 - [FRIH_HUMAN]                                                            | 36.28  | 20.77 | 4  | 4  | 12  | 0.106 | 0.189 |
| P02792 | Ferritin light chain OS=Homo sapiens GN=FTL PE=1 SV=2 - [FRIL_HUMAN]                                                             | 54.19  | 39.43 | 7  | 7  | 17  | 0.041 | 0.167 |
| P22830 | Ferrocyclase, mitochondrial OS=Homo sapiens GN=FECH PE=1 SV=2 - [HEMH_HUMAN]                                                     | 69.22  | 29.08 | 10 | 10 | 23  | 0.345 | 0.154 |
| Q5HY54 | Filamin A, alpha (Actin binding protein 280) OS=Homo sapiens GN=FLNA PE=2 SV=1 - [Q5HY54_HUMAN]                                  | 52.94  | 5.10  | 13 | 13 | 16  | 0.207 | 0.287 |
| Q5T1M5 | FK506-binding protein 15 OS=Homo sapiens GN=FKBP15 PE=1 SV=2 - [FKB15_HUMAN]                                                     | 15.96  | 4.18  | 4  | 4  | 4   | 0.381 | 0.348 |
| P30043 | Flavin reductase OS=Homo sapiens GN=BLVRB PE=1 SV=3 - [BLVRB_HUMAN]                                                              | 42.80  | 22.33 | 4  | 4  | 12  | 0.982 | 0.798 |
| O75955 | Flotillin-1 OS=Homo sapiens GN=FLOT1 PE=1 SV=3 - [FLOT1_HUMAN]                                                                   | 342.48 | 70.49 | 29 | 29 | 105 | 2.899 | 2.200 |
| Q14254 | Flotillin-2 OS=Homo sapiens GN=FLOT2 PE=1 SV=2 - [FLOT2_HUMAN]                                                                   | 366.37 | 60.98 | 28 | 28 | 106 | 2.982 | 2.809 |
| Q9H479 | Fructosamine-3-kinase OS=Homo sapiens GN=FN3K PE=1 SV=1 - [FN3K_HUMAN]                                                           | 25.24  | 21.36 | 6  | 6  | 7   | 1.104 | 1.266 |
| P04075 | Fructose-bisphosphate aldolase A OS=Homo sapiens GN=ALDOA PE=1 SV=2 - [ALDOA_HUMAN]                                              | 683.98 | 54.95 | 17 | 21 | 208 | 1.536 | 1.028 |
| B7Z1N6 | Fructose-bisphosphate aldolase OS=Homo sapiens GN=ALDOC PE=2 SV=1 - [B7Z1N6_HUMAN]                                               | 110.88 | 18.15 | 3  | 7  | 35  | 4.309 | 1.181 |
| Q86TT8 | Full-length cDNA clone CS0DC011YL17 of Neuroblastoma of Homo sapiens (human) OS=Homo sapiens GN=MARK3 PE=2 SV=1 - [Q86TT8_HUMAN] | 47.03  | 15.63 | 8  | 11 | 13  | 0.989 | 0.561 |
| P07954 | Fumarate hydratase, mitochondrial OS=Homo sapiens GN=FB PE=1 SV=3 - [FUMH_HUMAN]                                                 | 49.87  | 15.88 | 8  | 8  | 15  | 0.140 | 0.311 |
| Q9BWH2 | FUN14 domain-containing protein 2 OS=Homo sapiens GN=FUND2 PE=1 SV=2 - [FUND2_HUMAN]                                             | 7.55   | 11.64 | 2  | 2  | 2   | 0.091 | 0.141 |
| P43250 | G protein-coupled receptor kinase 6 OS=Homo sapiens GN=GRK6 PE=1 SV=2 - [GRK6_HUMAN]                                             | 20.44  | 10.24 | 6  | 6  | 7   | 1.249 | 1.463 |
| P17931 | Galectin-3 OS=Homo sapiens GN=LGALS3 PE=1 SV=5 - [LEG3_HUMAN]                                                                    | 116.93 | 39.20 | 10 | 11 | 39  | 0.361 | 0.171 |
| Q9UEY8 | Gamma-adducin OS=Homo sapiens GN=ADD3 PE=1 SV=1 - [ADDG_HUMAN]                                                                   | 49.34  | 13.88 | 9  | 9  | 15  | 0.825 | 1.895 |
| P60520 | Gamma-aminobutyric acid receptor-associated protein-like 2 OS=Homo sapiens GN=GABARAPL2 PE=1 SV=1 - [GBRL2_HUMAN]                | 24.57  | 41.03 | 4  | 5  | 8   | 0.701 | 1.623 |
| Q92820 | Gamma-glutamyl hydrolase OS=Homo sapiens GN=GGH PE=1 SV=2 - [GGH_HUMAN]                                                          | 5.97   | 6.29  | 2  | 2  | 2   | 0.046 | 0.100 |
| Q99747 | Gamma-soluble NSF attachment protein OS=Homo sapiens GN=NAPG PE=1 SV=1 - [SNAG_HUMAN]                                            | 7.67   | 8.65  | 2  | 3  | 3   | 0.279 | 0.387 |
| P15104 | Glutamine synthetase OS=Homo sapiens GN=GLUL PE=1 SV=4 - [GLNA_HUMAN]                                                            | 8.83   | 5.63  | 3  | 3  | 3   | 0.095 | 0.219 |
| Q86SX6 | Glutaredoxin-related protein 5, mitochondrial OS=Homo sapiens GN=GLRX5 PE=1 SV=2 - [GLRX5_HUMAN]                                 | 25.18  | 20.38 | 4  | 4  | 9   | 0.093 | 0.078 |
| Q92947 | Glutaryl-CoA dehydrogenase, mitochondrial OS=Homo sapiens GN=GCDH PE=1 SV=1 - [GCDH_HUMAN]                                       | 7.57   | 4.34  | 2  | 2  | 2   | 0.057 | 0.172 |
| C8KIM0 | Glutathione reductase delta8+9 alternative splicing variant OS=Homo sapiens GN=GSR PE=2 SV=1 - [C8KIM0_HUMAN]                    | 10.40  | 7.05  | 3  | 3  | 3   | 1.044 | 1.746 |
| P07203 | Glutathione peroxidase 1 OS=Homo sapiens GN=GPX1 PE=1 SV=4 - [GPX1_HUMAN]                                                        | 13.17  | 14.29 | 3  | 3  | 4   | 0.544 | 0.632 |

|        |                                                                                                                        |         |       |    |    |     |        |        |
|--------|------------------------------------------------------------------------------------------------------------------------|---------|-------|----|----|-----|--------|--------|
| P78417 | Glutathione S-transferase omega-1 OS=Homo sapiens GN=GSTO1 PE=1 SV=2 - [GSTO1_HUMAN]                                   | 15.88   | 13.69 | 3  | 3  | 5   | 0.315  | 0.452  |
| P04406 | Glyceraldehyde-3-phosphate dehydrogenase OS=Homo sapiens GN=GAPDH PE=1 SV=3 - [G3P_HUMAN]                              | 1215.74 | 68.06 | 10 | 22 | 420 | 1.015  | 1.167  |
| B8Q185 | Glycophorin A MNS blood group OS=Homo sapiens GN=GYP A PE=4 SV=1 - [B8Q185_HUMAN]                                      | 48.01   | 45.30 | 3  | 3  | 15  | 10.251 | 11.878 |
| P04921 | Glycophorin-C OS=Homo sapiens GN=GYP C PE=1 SV=1 - [GLPC_HUMAN]                                                        | 170.74  | 29.69 | 4  | 4  | 52  | 2.684  | 2.892  |
| P41250 | Glycyl-tRNA synthetase OS=Homo sapiens GN=GARS PE=1 SV=3 - [SYG_HUMAN]                                                 | 10.61   | 4.19  | 3  | 3  | 3   | 0.237  | 0.162  |
| P36959 | GMP reductase 1 OS=Homo sapiens GN=GMPR PE=1 SV=1 - [GMPR1_HUMAN]                                                      | 25.91   | 14.49 | 4  | 4  | 7   | 0.445  | 1.343  |
| Q9H4G4 | Golgi-associated plant pathogenesis-related protein 1 OS=Homo sapiens GN=GLIPR2 PE=1 SV=3 - [GAPR1_HUMAN]              | 70.40   | 40.26 | 6  | 6  | 18  | 4.382  | 5.674  |
| P28799 | Granulins OS=Homo sapiens GN=GRN PE=1 SV=2 - [GRN_HUMAN]                                                               | 9.72    | 7.08  | 3  | 3  | 3   | 1.068  | 0.534  |
| B4DWV5 | GrpE protein homolog OS=Homo sapiens GN=GRPEL1 PE=2 SV=1 - [B4DWV5_HUMAN]                                              | 14.16   | 23.98 | 4  | 4  | 4   | 0.192  | 0.138  |
| P62826 | GTP-binding nuclear protein Ran OS=Homo sapiens GN=RAN PE=1 SV=3 - [RAN_HUMAN]                                         | 17.01   | 20.83 | 4  | 4  | 5   | 0.337  | 1.051  |
| O00178 | GTP-binding protein 1 OS=Homo sapiens GN=GTPBP1 PE=1 SV=3 - [GTPB1_HUMAN]                                              | 13.56   | 2.99  | 2  | 2  | 4   | 0.436  | 0.476  |
| Q9BX10 | GTP-binding protein 2 OS=Homo sapiens GN=GTPBP2 PE=2 SV=1 - [GTPB2_HUMAN]                                              | 5.70    | 3.65  | 2  | 2  | 2   | 0.141  | 0.138  |
| P01116 | GTPase KRas OS=Homo sapiens GN=KRAS PE=1 SV=1 - [RASK_HUMAN]                                                           | 50.33   | 29.10 | 3  | 5  | 14  | 2.097  | 2.059  |
| P01111 | GTPase NRas OS=Homo sapiens GN=NRAS PE=1 SV=1 - [RASN_HUMAN]                                                           | 35.83   | 31.22 | 3  | 5  | 10  | 0.776  | 0.764  |
| Q14C86 | GTPase-activating protein and VPS9 domain-containing protein 1 OS=Homo sapiens GN=GAPVD1 PE=1 SV=2 - [GAPD1_HUMAN]     | 108.64  | 15.49 | 21 | 22 | 32  | 1.496  | 1.387  |
| P04899 | Guanine nucleotide-binding protein G(i) subunit alpha-2 OS=Homo sapiens GN=GNAI2 PE=1 SV=3 - [GNAI2_HUMAN]             | 84.95   | 32.11 | 5  | 12 | 26  | 0.644  | 0.860  |
| P59768 | Guanine nucleotide-binding protein G(I)/G(S)/G(O) subunit gamma-2 OS=Homo sapiens GN=GNG2 PE=1 SV=2 - [GBG2_HUMAN]     | 46.21   | 61.97 | 4  | 4  | 14  | 0.757  | 0.784  |
| P63218 | Guanine nucleotide-binding protein G(I)/G(S)/G(O) subunit gamma-5 OS=Homo sapiens GN=GNG5 PE=1 SV=3 - [GBG5_HUMAN]     | 55.36   | 33.82 | 3  | 3  | 19  | 0.895  | 1.057  |
| P62873 | Guanine nucleotide-binding protein G(I)/G(S)/G(T) subunit beta-1 OS=Homo sapiens GN=GNB1 PE=1 SV=3 - [GBB1_HUMAN]      | 69.86   | 24.41 | 5  | 8  | 20  | 1.134  | 1.638  |
| P62879 | Guanine nucleotide-binding protein G(I)/G(S)/G(T) subunit beta-2 OS=Homo sapiens GN=GNB2 PE=1 SV=3 - [GBB2_HUMAN]      | 71.63   | 24.41 | 5  | 8  | 21  | 0.518  | 0.659  |
| P08754 | Guanine nucleotide-binding protein G(k) subunit alpha OS=Homo sapiens GN=GNAI3 PE=1 SV=3 - [GNAI3_HUMAN]               | 86.25   | 33.62 | 5  | 12 | 27  | 0.546  | 1.087  |
| P50148 | Guanine nucleotide-binding protein G(q) subunit alpha OS=Homo sapiens GN=GNAQ PE=1 SV=4 - [GNAQ_HUMAN]                 | 25.30   | 16.16 | 3  | 6  | 8   | 0.887  | 0.683  |
| P63092 | Guanine nucleotide-binding protein G(s) subunit alpha isoforms short OS=Homo sapiens GN=GNAS PE=1 SV=1 - [GNAS2_HUMAN] | 70.93   | 18.02 | 5  | 7  | 20  | 0.967  | 1.168  |
| P29992 | Guanine nucleotide-binding protein subunit alpha-11 OS=Homo sapiens GN=GNA11 PE=1 SV=2 - [GNA11_HUMAN]                 | 14.14   | 10.31 | 2  | 5  | 5   | 0.389  | 0.306  |
| Q14344 | Guanine nucleotide-binding protein subunit alpha-13 OS=Homo sapiens GN=GNA13 PE=1 SV=2 - [GNA13_HUMAN]                 | 76.81   | 32.89 | 11 | 13 | 23  | 0.396  | 0.448  |
| P63244 | Guanine nucleotide-binding protein subunit beta-2-like 1 OS=Homo sapiens GN=GNB2L1 PE=1 SV=3 - [GBLP_HUMAN]            | 40.55   | 23.97 | 9  | 9  | 13  | 0.092  | 0.116  |
| B2RDM2 | HCG1811539, isoform CRA_b OS=Homo sapiens GN=TXNDC5 PE=2 SV=1 - [B2RDM2_HUMAN]                                         | 30.48   | 20.37 | 5  | 6  | 9   | 1.107  | 0.904  |
| A2A3U5 | HCG20471, isoform CRA_d OS=Homo sapiens GN=OPRS1 PE=2 SV=1 - [A2A3U5_HUMAN]                                            | 5.28    | 7.29  | 2  | 2  | 2   | 0.111  | 0.175  |
| B8ZZL8 | Heat shock 10kDa protein 1 (Chaperonin 10), isoform CRA_b OS=Homo sapiens GN=HSPE1 PE=3 SV=1 - [B8ZZL8_HUMAN]          | 79.07   | 59.41 | 8  | 8  | 24  | 0.037  | 0.067  |
| P08107 | Heat shock 70 kDa protein 1A/1B OS=Homo sapiens GN=HSPA1A PE=1 SV=5 - [HSP71_HUMAN]                                    | 244.67  | 33.85 | 15 | 21 | 74  | 1.045  | 0.697  |
| P34932 | Heat shock 70 kDa protein 4 OS=Homo sapiens GN=HSPA4 PE=1 SV=4 - [HSP74_HUMAN]                                         | 106.68  | 24.88 | 19 | 20 | 33  | 0.830  | 1.188  |
| P11142 | Heat shock cognate 71 kDa protein OS=Homo sapiens GN=HSPA8 PE=1 SV=1 - [HSP7C_HUMAN]                                   | 415.84  | 48.30 | 27 | 35 | 126 | 1.143  | 1.249  |
| P04792 | Heat shock protein beta-1 OS=Homo sapiens GN=HSPB1 PE=1 SV=2 - [HSPB1_HUMAN]                                           | 44.61   | 31.71 | 6  | 6  | 12  | 0.323  | 0.512  |
| P07900 | Heat shock protein HSP 90-alpha OS=Homo sapiens GN=HSP90AA1 PE=1 SV=5 - [HS90A_HUMAN]                                  | 220.18  | 35.66 | 16 | 28 | 68  | 0.557  | 0.621  |
| P08238 | Heat shock protein HSP 90-beta OS=Homo sapiens GN=HSP90AB1 PE=1 SV=4 - [HS90B_HUMAN]                                   | 123.98  | 26.93 | 6  | 19 | 38  | 0.609  | 0.404  |
| P09601 | Heme oxygenase 1 OS=Homo sapiens GN=HMOX1 PE=1 SV=1 - [HMOX1_HUMAN]                                                    | 18.66   | 10.42 | 3  | 3  | 6   | 0.667  | 0.218  |
| Q9BXL5 | Hemogen OS=Homo sapiens GN=HEMGN PE=1 SV=1 - [HEMGN_HUMAN]                                                             | 50.22   | 17.77 | 9  | 9  | 16  | 0.111  | 0.140  |
| P69905 | Hemoglobin subunit alpha OS=Homo sapiens GN=HBA1 PE=1 SV=2 - [HBA_HUMAN]                                               | 351.10  | 67.61 | 6  | 7  | 100 | 0.796  | 0.447  |
| P68871 | Hemoglobin subunit beta OS=Homo sapiens GN=HBB PE=1 SV=2 - [HBB_HUMAN]                                                 | 470.79  | 85.03 | 5  | 12 | 130 | 1.018  | 0.283  |
| P02042 | Hemoglobin subunit delta OS=Homo sapiens GN=HBD PE=1 SV=2 - [HBD_HUMAN]                                                | 240.15  | 76.19 | 4  | 11 | 66  | 2.447  | 0.371  |
| P69892 | Hemoglobin subunit gamma-2 OS=Homo sapiens GN=HBG2 PE=1 SV=2 - [HBG2_HUMAN]                                            | 601.36  | 77.55 | 3  | 12 | 161 | 0.520  | 0.590  |
| Q6B0K9 | Hemoglobin subunit mu OS=Homo sapiens GN=HBM PE=2 SV=1 - [HBM_HUMAN]                                                   | 16.35   | 17.73 | 2  | 2  | 5   | 0.583  | 0.515  |
| P02008 | Hemoglobin subunit zeta OS=Homo sapiens GN=HBZ PE=1 SV=2 - [HBAZ_HUMAN]                                                | 67.95   | 36.62 | 4  | 5  | 23  | 1.114  | 0.997  |
| D9YZU8 | Hemoglobin, gamma A OS=Homo sapiens GN=HBG1 PE=3 SV=1 - [D9YZU8_HUMAN]                                                 | 454.36  | 77.55 | 3  | 12 | 128 | 0.617  | 0.493  |
| P51858 | Hepatoma-derived growth factor OS=Homo sapiens GN=HDGF PE=1 SV=1 - [HDGF_HUMAN]                                        | 27.27   | 27.50 | 5  | 5  | 8   | 0.010  | 0.211  |
| P09651 | Heterogeneous nuclear ribonucleoprotein A1 OS=Homo sapiens GN=HNRNPA1 PE=1 SV=5 - [ROA1_HUMAN]                         | 110.65  | 17.20 | 4  | 7  | 34  | 0.108  | 0.086  |
| P31942 | Heterogeneous nuclear ribonucleoprotein H3 OS=Homo sapiens GN=HNRNPH3 PE=1 SV=2 - [HNRH3_HUMAN]                        | 8.09    | 8.67  | 2  | 2  | 2   | 0.029  | 0.082  |
| Q5T6W5 | Heterogeneous nuclear ribonucleoprotein K OS=Homo sapiens GN=HNRNPK PE=2 SV=1 - [Q5T6W5_HUMAN]                         | 75.89   | 27.34 | 11 | 11 | 21  | 0.105  | 0.175  |
| P14866 | Heterogeneous nuclear ribonucleoprotein L OS=Homo sapiens GN=HNRNPL PE=1 SV=2 - [HNRPL_HUMAN]                          | 17.00   | 5.09  | 3  | 3  | 5   | 0.717  | 0.217  |
| P52272 | Heterogeneous nuclear ribonucleoprotein M OS=Homo sapiens GN=HNRNPM PE=1 SV=3 - [HNRPM_HUMAN]                          | 39.15   | 11.51 | 9  | 9  | 12  | 0.068  | 0.057  |
| P22626 | Heterogeneous nuclear ribonucleoproteins A2/B1 OS=Homo sapiens GN=HNRNPA2B1 PE=1 SV=2 - [ROA2_HUMAN]                   | 131.98  | 34.56 | 10 | 13 | 41  | 0.113  | 0.066  |
| P26583 | High mobility group protein B2 OS=Homo sapiens GN=HMGB2 PE=1 SV=2 - [HMGB2_HUMAN]                                      | 8.19    | 7.66  | 2  | 2  | 3   | 0.029  | 0.028  |
| Q9BX68 | Histidine triad nucleotide-binding protein 2, mitochondrial OS=Homo sapiens GN=HINT2 PE=1 SV=1 - [HINT2_HUMAN]         | 15.90   | 14.72 | 2  | 2  | 5   | 0.199  | 0.187  |
| P16402 | Histone H1.3 OS=Homo sapiens GN=HIST1H1D PE=1 SV=2 - [H13_HUMAN]                                                       | 86.09   | 36.20 | 4  | 11 | 27  | 0.593  | 0.039  |
| P10412 | Histone H1.4 OS=Homo sapiens GN=HIST1H1E PE=1 SV=2 - [H14_HUMAN]                                                       | 76.32   | 37.44 | 2  | 10 | 24  | 0.391  | 0.054  |
| P16401 | Histone H1.5 OS=Homo sapiens GN=HIST1H1B PE=1 SV=3 - [H15_HUMAN]                                                       | 72.68   | 35.40 | 7  | 11 | 24  | 0.163  | 0.022  |



|        |                                                                                                                                    |        |       |    |    |    |       |       |
|--------|------------------------------------------------------------------------------------------------------------------------------------|--------|-------|----|----|----|-------|-------|
| O60814 | Histone H2B type 1-K OS=Homo sapiens GN=HIST1H2BK PE=1 SV=3 - [H2B1K_HUMAN]                                                        | 58.92  | 45.24 | 7  | 7  | 21 | 0.154 | 0.017 |
| P68431 | Histone H3.1 OS=Homo sapiens GN=HIST1H3A PE=1 SV=2 - [H31_HUMAN]                                                                   | 34.78  | 28.68 | 6  | 6  | 12 | 0.553 | 0.036 |
| P62805 | Histone H4 OS=Homo sapiens GN=HIST1H4A PE=1 SV=2 - [H4_HUMAN]                                                                      | 99.96  | 50.49 | 5  | 5  | 30 | 0.388 | 0.022 |
| B0UX83 | HLA-B associated transcript 3 OS=Homo sapiens GN=BAT3 PE=4 SV=1 - [B0UX83_HUMAN]                                                   | 14.06  | 4.09  | 4  | 4  | 4  | 0.432 | 0.456 |
| P51610 | Host cell factor 1 OS=Homo sapiens GN=HCFC1 PE=1 SV=2 - [HCFC1_HUMAN]                                                              | 7.20   | 0.98  | 2  | 2  | 2  | 0.315 | 0.388 |
| P50502 | Hsc70-interacting protein OS=Homo sapiens GN=ST13 PE=1 SV=2 - [F10A1_HUMAN]                                                        | 75.99  | 27.64 | 11 | 11 | 24 | 0.961 | 1.827 |
| Q16543 | Hsp90 co-chaperone Cdc37 OS=Homo sapiens GN=CDC37 PE=1 SV=1 - [CDC37_HUMAN]                                                        | 12.56  | 8.99  | 4  | 4  | 4  | 0.254 | 0.401 |
| Q16836 | Hydroxyacyl-coenzyme A dehydrogenase, mitochondrial OS=Homo sapiens GN=HADH PE=1 SV=3 - [HCDH_HUMAN]                               | 22.67  | 16.88 | 6  | 6  | 7  | 0.028 | 0.128 |
| Q16775 | Hydroxyacylglutathione hydrolase, mitochondrial OS=Homo sapiens GN=HAGH PE=1 SV=2 - [GLO2_HUMAN]                                   | 40.41  | 18.51 | 5  | 5  | 14 | 1.394 | 1.013 |
| Q6YN16 | Hydroxysteroid dehydrogenase-like protein 2 OS=Homo sapiens GN=HSDL2 PE=1 SV=1 - [HSDL2_HUMAN]                                     | 12.63  | 6.94  | 3  | 3  | 4  | 0.180 | 0.167 |
| Q9Y4L1 | Hypoxia up-regulated protein 1 OS=Homo sapiens GN=HYOU1 PE=1 SV=1 - [HYOU1_HUMAN]                                                  | 79.46  | 15.02 | 15 | 15 | 23 | 0.621 | 0.592 |
| Q14974 | Importin subunit beta-1 OS=Homo sapiens GN=KPNB1 PE=1 SV=2 - [IMB1_HUMAN]                                                          | 104.21 | 15.41 | 14 | 14 | 30 | 0.462 | 0.837 |
| O00410 | Importin-5 OS=Homo sapiens GN=IPO5 PE=1 SV=4 - [IPO5_HUMAN]                                                                        | 42.67  | 6.56  | 7  | 7  | 12 | 0.783 | 1.506 |
| O95373 | Importin-7 OS=Homo sapiens GN=IPO7 PE=1 SV=1 - [IPO7_HUMAN]                                                                        | 33.02  | 6.74  | 6  | 6  | 9  | 2.597 | 2.677 |
| P05556 | Integrin beta-1 OS=Homo sapiens GN=ITGB1 PE=1 SV=2 - [ITB1_HUMAN]                                                                  | 24.57  | 10.40 | 7  | 7  | 7  | 0.224 | 0.176 |
| Q14773 | Intercellular adhesion molecule 4 OS=Homo sapiens GN=ICAM4 PE=2 SV=1 - [ICAM4_HUMAN]                                               | 18.22  | 19.93 | 5  | 5  | 6  | 2.414 | 4.418 |
| Q12905 | Interleukin enhancer-binding factor 2 OS=Homo sapiens GN=ILF2 PE=1 SV=2 - [ILF2_HUMAN]                                             | 12.12  | 9.49  | 3  | 3  | 3  | 0.214 | 0.242 |
| P48735 | Isocitrate dehydrogenase [NADP], mitochondrial OS=Homo sapiens GN=IDH2 PE=1 SV=2 - [IDHP_HUMAN]                                    | 115.62 | 34.73 | 16 | 16 | 38 | 0.103 | 0.216 |
| P53990 | IST1 homolog OS=Homo sapiens GN=KIAA0174 PE=1 SV=1 - [IST1_HUMAN]                                                                  | 16.50  | 11.54 | 5  | 5  | 5  | 0.774 | 1.196 |
| Q9Y624 | Junctional adhesion molecule A OS=Homo sapiens GN=F11R PE=1 SV=1 - [JAM1_HUMAN]                                                    | 18.54  | 16.05 | 6  | 6  | 6  | 3.475 | 1.624 |
| Q5TFJ7 | Karyopherin alpha 6 (Importin alpha 7) (Fragment) OS=Homo sapiens GN=KPNA6 PE=2 SV=1 - [Q5TFJ7_HUMAN]                              | 12.74  | 9.35  | 2  | 3  | 4  | 1.351 | 1.710 |
| P23276 | Kell blood group glycoprotein OS=Homo sapiens GN=KEL PE=1 SV=2 - [KELL_HUMAN]                                                      | 53.63  | 10.52 | 8  | 8  | 18 | 3.245 | 2.189 |
| P13645 | Keratin, type I cytoskeletal 10 OS=Homo sapiens GN=KRT10 PE=1 SV=6 - [K1C10_HUMAN]                                                 | 20.74  | 8.56  | 4  | 5  | 6  | 0.313 | 0.406 |
| P35527 | Keratin, type I cytoskeletal 9 OS=Homo sapiens GN=KRT9 PE=1 SV=3 - [K1C9_HUMAN]                                                    | 13.05  | 6.90  | 2  | 3  | 3  | 0.275 | 0.466 |
| P04264 | Keratin, type II cytoskeletal 1 OS=Homo sapiens GN=KRT1 PE=1 SV=6 - [K2C1_HUMAN]                                                   | 36.47  | 14.91 | 11 | 11 | 12 | 0.463 | 0.460 |
| Q17RZ5 | Kinectin 1 (Kinesin receptor) OS=Homo sapiens GN=KTN1 PE=2 SV=1 - [Q17RZ5_HUMAN]                                                   | 9.05   | 2.53  | 3  | 3  | 3  | 0.014 | 0.106 |
| P33176 | Kinesin-1 heavy chain OS=Homo sapiens GN=KIF5B PE=1 SV=1 - [KINH_HUMAN]                                                            | 30.75  | 5.50  | 5  | 5  | 10 | 1.284 | 0.901 |
| P07195 | L-lactate dehydrogenase B chain OS=Homo sapiens GN=LDHB PE=1 SV=2 - [LDHB_HUMAN]                                                   | 90.82  | 26.35 | 7  | 8  | 25 | 0.429 | 1.664 |
| E9PH51 | L-lactate dehydrogenase OS=Homo sapiens GN=LDHA PE=3 SV=2 - [E9PH51_HUMAN]                                                         | 74.04  | 30.16 | 9  | 10 | 22 | 0.134 | 0.237 |
| Q7Z4W1 | L-xylulose reductase OS=Homo sapiens GN=DCXR PE=1 SV=2 - [DCXR_HUMAN]                                                              | 9.85   | 7.38  | 2  | 2  | 3  | 0.220 | 0.622 |
| Q6PKG0 | La-related protein 1 OS=Homo sapiens GN=LARP1 PE=1 SV=2 - [LARP1_HUMAN]                                                            | 15.73  | 3.92  | 4  | 5  | 5  | 0.191 | 0.152 |
| Q9NS86 | LanC-like protein 2 OS=Homo sapiens GN=LANCL2 PE=1 SV=1 - [LANC2_HUMAN]                                                            | 22.82  | 12.22 | 5  | 5  | 7  | 2.886 | 2.943 |
| Q01650 | Large neutral amino acids transporter small subunit 1 OS=Homo sapiens GN=SLC7A5 PE=1 SV=2 - [LAT1_HUMAN]                           | 18.41  | 6.31  | 3  | 3  | 5  | 0.821 | 0.052 |
| Q14696 | LDLR chaperone MESD OS=Homo sapiens GN=MESDC2 PE=1 SV=2 - [MESD_HUMAN]                                                             | 5.83   | 8.97  | 2  | 2  | 2  | 1.009 | 0.912 |
| O95202 | LETM1 and EF-hand domain-containing protein 1, mitochondrial OS=Homo sapiens GN=LETM1 PE=1 SV=1 - [LETM1_HUMAN]                    | 15.51  | 5.82  | 4  | 4  | 5  | 0.077 | 0.143 |
| Q8N9N7 | Leucine-rich repeat-containing protein 57 OS=Homo sapiens GN=LRRC57 PE=1 SV=1 - [LRC57_HUMAN]                                      | 44.66  | 32.64 | 8  | 8  | 14 | 1.527 | 1.386 |
| Q96AG4 | Leucine-rich repeat-containing protein 59 OS=Homo sapiens GN=LRRC59 PE=1 SV=1 - [LRC59_HUMAN]                                      | 18.71  | 11.07 | 4  | 4  | 6  | 0.337 | 0.354 |
| O95573 | Long-chain-fatty-acid--CoA ligase 3 OS=Homo sapiens GN=ACSL3 PE=1 SV=3 - [ACSL3_HUMAN]                                             | 14.74  | 5.14  | 2  | 3  | 4  | 0.380 | 0.477 |
| Q969J3 | Loss of heterozygosity 12 chromosomal region 1 protein OS=Homo sapiens GN=LOH12CR1 PE=1 SV=1 - [L12R1_HUMAN]                       | 6.15   | 8.67  | 2  | 2  | 2  | 0.088 | 0.241 |
| P05455 | Lupus La protein OS=Homo sapiens GN=SSB PE=1 SV=2 - [LA_HUMAN]                                                                     | 10.17  | 6.13  | 3  | 3  | 3  | 0.439 | 0.438 |
| Q6ZWT7 | Lysophospholipid acyltransferase 2 OS=Homo sapiens GN=MBOAT2 PE=2 SV=2 - [MBOA2_HUMAN]                                             | 14.41  | 6.54  | 3  | 3  | 4  | 1.151 | 1.168 |
| Q14108 | Lysosome membrane protein 2 OS=Homo sapiens GN=SCARB2 PE=1 SV=2 - [SCR2_HUMAN]                                                     | 9.36   | 5.44  | 3  | 3  | 3  | 0.149 | 0.141 |
| P11279 | Lysosome-associated membrane glycoprotein 1 OS=Homo sapiens GN=LAMP1 PE=1 SV=3 - [LAMP1_HUMAN]                                     | 21.32  | 8.39  | 4  | 4  | 6  | 0.269 | 0.073 |
| P40925 | Malate dehydrogenase, cytoplasmic OS=Homo sapiens GN=MDH1 PE=1 SV=4 - [MDHC_HUMAN]                                                 | 18.40  | 15.87 | 5  | 5  | 5  | 0.185 | 0.516 |
| P40926 | Malate dehydrogenase, mitochondrial OS=Homo sapiens GN=MDH2 PE=1 SV=3 - [MDHM_HUMAN]                                               | 108.11 | 50.89 | 14 | 14 | 30 | 0.064 | 0.136 |
| B8ZZG1 | Membrane protein, palmitoylated 6 (MAGUK p55 subfamily member 6), isoform CRA_a OS=Homo sapiens GN=MPP6 PE=4 SV=1 - [B8ZZG1_HUMAN] | 18.11  | 8.88  | 4  | 4  | 6  | 1.872 | 1.552 |
| P51811 | Membrane transport protein XK OS=Homo sapiens GN=XK PE=1 SV=5 - [XK_HUMAN]                                                         | 40.36  | 9.91  | 6  | 6  | 13 | 2.411 | 2.520 |
| O15173 | Membrane-associated progesterone receptor component 2 OS=Homo sapiens GN=PGRMC2 PE=1 SV=1 - [PGR2_HUMAN]                           | 20.86  | 24.22 | 5  | 5  | 6  | 0.643 | 0.556 |
| P35240 | Merlin OS=Homo sapiens GN=NF2 PE=1 SV=1 - [MERL_HUMAN]                                                                             | 14.39  | 4.37  | 2  | 3  | 5  | 1.024 | 2.050 |
| P50579 | Methionine aminopeptidase 2 OS=Homo sapiens GN=METAP2 PE=1 SV=1 - [AMPM2_HUMAN]                                                    | 8.66   | 6.90  | 2  | 2  | 2  | 0.107 | 0.162 |
| Q9H8H3 | Methyltransferase-like protein 7A OS=Homo sapiens GN=METTL7A PE=1 SV=1 - [MET7A_HUMAN]                                             | 12.95  | 17.21 | 3  | 3  | 4  | 1.487 | 1.273 |
| Q8IY33 | MICAL-like protein 2 OS=Homo sapiens GN=MICALL2 PE=1 SV=1 - [MILK2_HUMAN]                                                          | 39.63  | 9.40  | 8  | 8  | 11 | 0.673 | 0.701 |
| Q15691 | Microtubule-associated protein RP/EB family member 1 OS=Homo sapiens GN=MAPRE1 PE=1 SV=3 - [MARE1_HUMAN]                           | 5.69   | 10.07 | 2  | 2  | 2  | 1.264 | 1.394 |
| Q8TCT9 | Minor histocompatibility antigen H13 OS=Homo sapiens GN=HM13 PE=1 SV=1 - [HM13_HUMAN]                                              | 6.64   | 4.77  | 2  | 2  | 2  | 0.423 | 0.625 |
| Q02978 | Mitochondrial 2-oxoglutarate/malate carrier protein OS=Homo sapiens GN=SLC25A11 PE=1 SV=3 - [M2OM_HUMAN]                           | 18.03  | 18.79 | 4  | 5  | 5  | 0.081 | 0.175 |
| Q9Y3D6 | Mitochondrial fission 1 protein OS=Homo sapiens GN=FIS1 PE=1 SV=2 - [FIS1_HUMAN]                                                   | 6.06   | 13.16 | 2  | 2  | 2  | 0.231 | 0.261 |

|        |                                                                                                                          |        |       |    |    |     |       |       |
|--------|--------------------------------------------------------------------------------------------------------------------------|--------|-------|----|----|-----|-------|-------|
| O43615 | Mitochondrial import inner membrane translocase subunit TIM44 OS=Homo sapiens GN=TIMM44 PE=1 SV=2 - [TIM44_HUMAN]        | 9.19   | 5.97  | 3  | 3  | 3   | 0.106 | 0.051 |
| Q9NYZ2 | Mitoferrin-1 OS=Homo sapiens GN=SLC25A37 PE=1 SV=2 - [MFRN1_HUMAN]                                                       | 12.96  | 11.83 | 3  | 4  | 4   | 0.075 | 0.211 |
| P26038 | Moesin OS=Homo sapiens GN=MSN PE=1 SV=3 - [MOES_HUMAN]                                                                   | 245.89 | 40.73 | 23 | 33 | 75  | 0.428 | 1.023 |
| P53985 | Monocarboxylate transporter 1 OS=Homo sapiens GN=SLC16A1 PE=1 SV=3 - [MOT1_HUMAN]                                        | 61.04  | 9.60  | 6  | 6  | 18  | 0.241 | 0.866 |
| O15439 | Multidrug resistance-associated protein 4 OS=Homo sapiens GN=ABCC4 PE=1 SV=3 - [MRP4_HUMAN]                              | 60.66  | 11.25 | 15 | 15 | 18  | 1.213 | 0.769 |
| Q9UNW1 | Multiple inositol polyphosphate phosphatase 1 OS=Homo sapiens GN=MINPP1 PE=1 SV=1 - [MINP1_HUMAN]                        | 10.20  | 5.75  | 3  | 3  | 3   | 0.729 | 0.928 |
| P12829 | Myosin light chain 4 OS=Homo sapiens GN=MYL4 PE=1 SV=3 - [MYL4_HUMAN]                                                    | 66.79  | 53.30 | 8  | 8  | 20  | 0.226 | 0.777 |
| P60660 | Myosin light polypeptide 6 OS=Homo sapiens GN=MYL6 PE=1 SV=2 - [MYL6_HUMAN]                                              | 11.02  | 24.50 | 3  | 3  | 3   | 0.279 | 0.323 |
| P19105 | Myosin regulatory light chain 12A OS=Homo sapiens GN=MYL12A PE=1 SV=2 - [ML12A_HUMAN]                                    | 28.99  | 22.22 | 4  | 4  | 8   | 0.287 | 0.741 |
| P35580 | Myosin-10 OS=Homo sapiens GN=MYH10 PE=1 SV=3 - [MYH10_HUMAN]                                                             | 667.07 | 39.27 | 74 | 88 | 200 | 0.180 | 0.766 |
| P35579 | Myosin-9 OS=Homo sapiens GN=MYH9 PE=1 SV=4 - [MYH9_HUMAN]                                                                | 740.90 | 45.36 | 83 | 96 | 229 | 0.292 | 0.710 |
| Q13423 | NAD(P) transhydrogenase, mitochondrial OS=Homo sapiens GN=NNT PE=1 SV=3 - [NNTM_HUMAN]                                   | 75.97  | 18.14 | 18 | 18 | 23  | 0.124 | 0.196 |
| O00483 | NADH dehydrogenase [ubiquinone] 1 alpha subcomplex subunit 4 OS=Homo sapiens GN=NDUFA4 PE=1 SV=1 - [NDUA4_HUMAN]         | 8.05   | 18.52 | 2  | 2  | 3   | 0.086 | 0.155 |
| O95182 | NADH dehydrogenase [ubiquinone] 1 alpha subcomplex subunit 7 OS=Homo sapiens GN=NDUFA7 PE=1 SV=3 - [NDUA7_HUMAN]         | 6.29   | 8.85  | 2  | 2  | 2   | 0.382 | 0.169 |
| O96000 | NADH dehydrogenase [ubiquinone] 1 beta subcomplex subunit 10 OS=Homo sapiens GN=NDUFB10 PE=1 SV=3 - [NDUBA_HUMAN]        | 6.35   | 12.21 | 2  | 2  | 2   | 0.111 | 0.262 |
| P17568 | NADH dehydrogenase [ubiquinone] 1 beta subcomplex subunit 7 OS=Homo sapiens GN=NDUFB7 PE=1 SV=4 - [NDUB7_HUMAN]          | 5.17   | 13.87 | 2  | 2  | 2   | 0.265 | 0.253 |
| P19404 | NADH dehydrogenase [ubiquinone] flavoprotein 2, mitochondrial OS=Homo sapiens GN=NDUFV2 PE=1 SV=2 - [NDUV2_HUMAN]        | 6.56   | 7.63  | 2  | 2  | 2   |       | 0.080 |
| O75489 | NADH dehydrogenase [ubiquinone] iron-sulfur protein 3, mitochondrial OS=Homo sapiens GN=NDUFS3 PE=1 SV=1 - [NDUS3_HUMAN] | 9.48   | 15.15 | 3  | 3  | 3   | 0.298 | 0.152 |
| P00387 | NADH-cytochrome b5 reductase 3 OS=Homo sapiens GN=CYB5R3 PE=1 SV=3 - [NB5R3_HUMAN]                                       | 24.28  | 16.61 | 4  | 4  | 7   | 1.134 | 0.931 |
| Q13765 | Nascent polypeptide-associated complex subunit alpha OS=Homo sapiens GN=NACA PE=1 SV=1 - [NACA_HUMAN]                    | 7.50   | 13.49 | 2  | 2  | 2   | 0.020 | 0.297 |
| A2RRP1 | Neuroblastoma-amplified sequence OS=Homo sapiens GN=NBAS PE=1 SV=2 - [NBAS_HUMAN]                                        | 21.58  | 2.66  | 7  | 7  | 7   | 0.690 | 0.693 |
| B2RAL7 | Neuroplastin OS=Homo sapiens GN=NPTN PE=2 SV=1 - [B2RAL7_HUMAN]                                                          | 17.41  | 8.51  | 2  | 2  | 5   | 2.937 | 2.552 |
| Q14697 | Neutral alpha-glucosidase AB OS=Homo sapiens GN=GANAB PE=1 SV=3 - [GANAB_HUMAN]                                          | 108.46 | 19.70 | 4  | 19 | 35  | 0.873 | 0.787 |
| Q15758 | Neutral amino acid transporter B(0) OS=Homo sapiens GN=SLC1A5 PE=1 SV=2 - [AAAT_HUMAN]                                   | 23.22  | 5.73  | 3  | 3  | 6   | 0.204 | 0.100 |
| Q6PIU2 | Neutral cholesterol ester hydrolase 1 OS=Homo sapiens GN=NCEH1 PE=1 SV=3 - [NCEH1_HUMAN]                                 | 44.61  | 20.83 | 7  | 7  | 12  | 0.715 | 0.717 |
| Q49AL4 | NMNAT3 protein OS=Homo sapiens GN=NMNAT3 PE=2 SV=1 - [Q49AL4_HUMAN]                                                      | 10.81  | 11.97 | 2  | 2  | 3   | 0.703 | 0.350 |
| P69849 | Nodal modulator 3 OS=Homo sapiens GN=NOMO3 PE=2 SV=2 - [NOMO3_HUMAN]                                                     | 6.01   | 1.72  | 2  | 2  | 2   | 0.848 | 0.653 |
| Q9UNZ2 | NSFL1 cofactor p47 OS=Homo sapiens GN=NSFL1C PE=1 SV=2 - [NSF1C_HUMAN]                                                   | 62.35  | 38.92 | 11 | 11 | 19  | 1.156 | 1.728 |
| Q14980 | Nuclear mitotic apparatus protein 1 OS=Homo sapiens GN=NUMA1 PE=1 SV=2 - [NUMA1_HUMAN]                                   | 11.78  | 1.80  | 3  | 3  | 3   | 0.428 | 0.235 |
| P61970 | Nuclear transport factor 2 OS=Homo sapiens GN=NUTF2 PE=1 SV=1 - [NUTF2_HUMAN]                                            | 6.15   | 11.02 | 2  | 2  | 2   | 0.188 | 0.440 |
| Q9H1E3 | Nuclear ubiquitous casein and cyclin-dependent kinases substrate OS=Homo sapiens GN=NUCKS1 PE=1 SV=1 - [NUCKS_HUMAN]     | 6.19   | 6.58  | 2  | 2  | 2   | 0.086 | 0.169 |
| P67809 | Nuclease-sensitive element-binding protein 1 OS=Homo sapiens GN=YBX1 PE=1 SV=3 - [YBOX1_HUMAN]                           | 83.79  | 41.98 | 7  | 9  | 26  | 0.122 | 0.160 |
| P19338 | Nucleolin OS=Homo sapiens GN=NCL PE=1 SV=3 - [NUCL_HUMAN]                                                                | 30.89  | 8.73  | 9  | 9  | 10  | 0.116 | 0.115 |
| Q9BYG9 | Nucleophosmin (Nucleolar phosphoprotein B23, numatrin) OS=Homo sapiens GN=NPM1 PE=2 SV=1 - [Q9BYG9_HUMAN]                | 9.09   | 10.04 | 3  | 3  | 3   | 0.274 | 0.200 |
| B3KV44 | Nucleosome assembly protein 1-like 1, isoform CRA_c OS=Homo sapiens GN=NAP1L1 PE=2 SV=1 - [B3KV44_HUMAN]                 | 22.89  | 13.93 | 2  | 3  | 7   | 1.772 | 2.595 |
| Q9NTK5 | Obg-like ATPase 1 OS=Homo sapiens GN=OLA1 PE=1 SV=2 - [OLA1_HUMAN]                                                       | 24.74  | 13.89 | 6  | 6  | 8   | 0.814 | 1.007 |
| Q96CV9 | Optineurin OS=Homo sapiens GN=OPTN PE=1 SV=2 - [OPTN_HUMAN]                                                              | 42.95  | 12.48 | 7  | 7  | 13  | 0.626 | 0.898 |
| P04181 | Ornithine aminotransferase, mitochondrial OS=Homo sapiens GN=OAT PE=1 SV=1 - [OAT_HUMAN]                                 | 43.84  | 23.69 | 10 | 10 | 13  | 0.081 | 0.081 |
| Q9BRP8 | Partner of Y14 and mago OS=Homo sapiens GN=WIBG PE=1 SV=1 - [WIBG_HUMAN]                                                 | 12.31  | 18.14 | 3  | 3  | 4   | 0.071 | 0.141 |
| P62937 | Peptidyl-prolyl cis-trans isomerase A OS=Homo sapiens GN=PPIA PE=1 SV=2 - [PPIA_HUMAN]                                   | 14.56  | 22.42 | 4  | 4  | 5   | 0.156 | 0.176 |
| P23284 | Peptidyl-prolyl cis-trans isomerase B OS=Homo sapiens GN=PPIB PE=1 SV=2 - [PPIB_HUMAN]                                   | 37.08  | 27.31 | 7  | 7  | 12  | 0.602 | 0.986 |
| Q00688 | Peptidyl-prolyl cis-trans isomerase FKBP3 OS=Homo sapiens GN=FKBP3 PE=1 SV=1 - [FKBP3_HUMAN]                             | 80.75  | 53.13 | 14 | 14 | 25  | 0.637 | 1.621 |
| Q02790 | Peptidyl-prolyl cis-trans isomerase FKBP4 OS=Homo sapiens GN=FKBP4 PE=1 SV=3 - [FKBP4_HUMAN]                             | 6.14   | 3.49  | 2  | 2  | 2   | 0.452 | 0.876 |
| Q9Y237 | Peptidyl-prolyl cis-trans isomerase NIMA-interacting 4 OS=Homo sapiens GN=PIN4 PE=1 SV=1 - [PIN4_HUMAN]                  | 21.87  | 19.08 | 3  | 3  | 6   | 0.908 | 3.833 |
| O60664 | Perilipin-3 OS=Homo sapiens GN=PLIN3 PE=1 SV=3 - [PLIN3_HUMAN]                                                           | 7.60   | 3.92  | 2  | 2  | 2   | 1.664 | 1.327 |
| Q06830 | Peroxiredoxin-1 OS=Homo sapiens GN=PRDX1 PE=1 SV=1 - [PRDX1_HUMAN]                                                       | 127.67 | 56.28 | 8  | 10 | 37  | 0.693 | 2.303 |
| P32119 | Peroxiredoxin-2 OS=Homo sapiens GN=PRDX2 PE=1 SV=5 - [PRDX2_HUMAN]                                                       | 432.84 | 59.09 | 10 | 11 | 136 | 1.282 | 3.425 |
| P30044 | Peroxiredoxin-5, mitochondrial OS=Homo sapiens GN=PRDX5 PE=1 SV=4 - [PRDX5_HUMAN]                                        | 10.56  | 10.28 | 2  | 2  | 3   | 0.713 | 0.240 |
| Q9Y285 | Phenylalanyl-tRNA synthetase alpha chain OS=Homo sapiens GN=FARSA PE=1 SV=3 - [SYFA_HUMAN]                               | 19.39  | 8.66  | 4  | 5  | 7   | 0.412 | 0.188 |
| Q9NSD9 | Phenylalanyl-tRNA synthetase beta chain OS=Homo sapiens GN=FARSB PE=1 SV=3 - [SYFB_HUMAN]                                | 57.34  | 23.43 | 14 | 15 | 18  | 0.353 | 0.197 |
| Q00325 | Phosphate carrier protein, mitochondrial OS=Homo sapiens GN=SLC25A3 PE=1 SV=2 - [MPCP_HUMAN]                             | 33.51  | 15.47 | 6  | 6  | 10  | 0.021 | 0.107 |
| Q92539 | Phosphatidate phosphatase LPIN2 OS=Homo sapiens GN=LPIN2 PE=1 SV=1 - [LPIN2_HUMAN]                                       | 17.87  | 4.69  | 4  | 4  | 5   | 0.981 | 0.941 |
| Q9BTU6 | Phosphatidylinositol 4-kinase type 2-alpha OS=Homo sapiens GN=PI4K2A PE=1 SV=1 - [P4K2A_HUMAN]                           | 80.24  | 41.54 | 16 | 16 | 26  | 0.171 | 0.235 |
| Q92835 | Phosphatidylinositol-3,4,5-trisphosphate 5-phosphatase 1 OS=Homo sapiens GN=INPP5D PE=1 SV=2 - [SHIP1_HUMAN]             | 26.74  | 5.63  | 7  | 7  | 9   | 0.559 | 0.520 |
| P48426 | Phosphatidylinositol-5-phosphate 4-kinase type-2 alpha OS=Homo sapiens GN=PIP4K2A PE=1 SV=2 - [PI42A_HUMAN]              | 60.49  | 29.80 | 12 | 13 | 19  | 2.069 | 0.963 |
| Q13492 | Phosphatidylinositol-binding clathrin assembly protein OS=Homo sapiens GN=PICALM PE=1 SV=2 - [PICAL_HUMAN]               | 64.67  | 13.96 | 9  | 11 | 21  | 0.467 | 0.341 |

|        |                                                                                                                           |         |       |    |    |     |       |       |
|--------|---------------------------------------------------------------------------------------------------------------------------|---------|-------|----|----|-----|-------|-------|
| Q16822 | Phosphoenolpyruvate carboxykinase [GTP], mitochondrial OS=Homo sapiens GN=PCK2 PE=1 SV=3 - [PCKGM_HUMAN]                  | 17.09   | 6.41  | 4  | 4  | 5   | 0.039 | 0.068 |
| B7Z7A9 | Phosphoglycerate kinase OS=Homo sapiens GN=PGK1 PE=2 SV=1 - [B7Z7A9_HUMAN]                                                | 38.93   | 18.77 | 8  | 8  | 12  | 0.265 | 0.890 |
| Q9Y263 | Phospholipase A-2-activating protein OS=Homo sapiens GN=PLAA PE=1 SV=2 - [PLAP_HUMAN]                                     | 8.86    | 2.39  | 2  | 2  | 2   | 0.238 | 0.496 |
| P36969 | Phospholipid hydroperoxide glutathione peroxidase, mitochondrial OS=Homo sapiens GN=GPX4 PE=1 SV=3 - [GPX4_HUMAN]         | 27.42   | 22.84 | 6  | 6  | 8   | 1.306 | 1.299 |
| O60256 | Phosphoribosyl pyrophosphate synthase-associated protein 2 OS=Homo sapiens GN=PRPSAP2 PE=1 SV=1 - [KPRB_HUMAN]            | 59.43   | 21.41 | 5  | 7  | 17  | 1.633 | 1.274 |
| Q9GZP4 | PITH domain-containing protein 1 OS=Homo sapiens GN=PITHD1 PE=1 SV=1 - [PITH1_HUMAN]                                      | 11.45   | 18.01 | 4  | 4  | 4   | 1.470 | 0.849 |
| P20020 | Plasma membrane calcium-transporting ATPase 1 OS=Homo sapiens GN=ATP2B1 PE=1 SV=3 - [AT2B1_HUMAN]                         | 97.19   | 17.33 | 9  | 19 | 28  | 1.149 | 1.048 |
| P23634 | Plasma membrane calcium-transporting ATPase 4 OS=Homo sapiens GN=ATP2B4 PE=1 SV=2 - [AT2B4_HUMAN]                         | 154.95  | 21.11 | 16 | 26 | 46  | 2.245 | 2.066 |
| Q8NC51 | Plasminogen activator inhibitor 1 RNA-binding protein OS=Homo sapiens GN=SERBP1 PE=1 SV=2 - [PAIRB_HUMAN]                 | 51.35   | 22.30 | 10 | 10 | 15  | 0.068 | 0.122 |
| P13796 | Plastin-2 OS=Homo sapiens GN=LCP1 PE=1 SV=6 - [PLSL_HUMAN]                                                                | 5.43    | 4.31  | 2  | 2  | 2   | 0.495 | 0.644 |
| Q68Y55 | Poly(RC) binding protein 2 OS=Homo sapiens GN=PCBP2 PE=2 SV=1 - [Q68Y55_HUMAN]                                            | 38.24   | 21.75 | 2  | 6  | 12  | 0.431 | 0.236 |
| Q15365 | Poly(rC)-binding protein 1 OS=Homo sapiens GN=PCBP1 PE=1 SV=2 - [PCBP1_HUMAN]                                             | 49.40   | 30.90 | 5  | 9  | 15  | 0.095 | 0.141 |
| P11940 | Polyadenylate-binding protein 1 OS=Homo sapiens GN=PABPC1 PE=1 SV=2 - [PABP1_HUMAN]                                       | 39.37   | 18.71 | 11 | 11 | 12  | 0.484 | 0.346 |
| P26599 | Polypyrimidine tract-binding protein 1 OS=Homo sapiens GN=PTBP1 PE=1 SV=1 - [PTBP1_HUMAN]                                 | 32.78   | 9.60  | 6  | 6  | 10  | 1.272 | 0.558 |
| Q9UHV9 | Prefoldin subunit 2 OS=Homo sapiens GN=PFDN2 PE=1 SV=1 - [PFD2_HUMAN]                                                     | 10.22   | 12.99 | 2  | 2  | 3   | 0.084 | 0.334 |
| P07602 | Proactivator polypeptide OS=Homo sapiens GN=PSAP PE=1 SV=2 - [SAP_HUMAN]                                                  | 97.18   | 20.23 | 13 | 13 | 30  | 0.075 | 0.164 |
| Q9Y4D8 | Probable E3 ubiquitin-protein ligase C12orf51 OS=Homo sapiens GN=C12orf51 PE=1 SV=5 - [K0614_HUMAN]                       | 42.37   | 2.80  | 11 | 11 | 13  | 0.180 | 0.282 |
| Q9H3G5 | Probable serine carboxypeptidase CPVL OS=Homo sapiens GN=CPVL PE=1 SV=2 - [CPVL_HUMAN]                                    | 14.87   | 7.98  | 4  | 4  | 5   | 0.127 | 0.152 |
| Q93008 | Probable ubiquitin carboxyl-terminal hydrolase FAF-X OS=Homo sapiens GN=USP9X PE=1 SV=3 - [USP9X_HUMAN]                   | 120.29  | 9.49  | 27 | 27 | 38  | 0.548 | 0.845 |
| O14737 | Programmed cell death protein 5 OS=Homo sapiens GN=PDCD5 PE=1 SV=3 - [PDCD5_HUMAN]                                        | 22.94   | 34.40 | 5  | 5  | 7   | 0.281 | 0.812 |
| Q99623 | Prohibitin-2 OS=Homo sapiens GN=PHB2 PE=1 SV=2 - [PHB2_HUMAN]                                                             | 67.14   | 37.79 | 12 | 12 | 20  | 0.109 | 0.156 |
| Q9UQ80 | Proliferation-associated protein 2G4 OS=Homo sapiens GN=PA2G4 PE=1 SV=3 - [PA2G4_HUMAN]                                   | 96.44   | 37.82 | 14 | 14 | 31  | 0.214 | 0.348 |
| Q16186 | Proteasomal ubiquitin receptor ADRM1 OS=Homo sapiens GN=ADRM1 PE=1 SV=2 - [ADRM1_HUMAN]                                   | 16.06   | 8.11  | 3  | 3  | 5   | 0.368 | 0.250 |
| A8K3Z3 | Proteasome (Prosome, macropain) 26S subunit, ATPase, 5, isoform CRA_b OS=Homo sapiens GN=PSMC5 PE=2 SV=1 - [A8K3Z3_HUMAN] | 66.99   | 23.87 | 9  | 10 | 19  | 1.318 | 0.756 |
| B1AJY5 | Proteasome (Prosome, macropain) 26S subunit, non-ATPase, 10 OS=Homo sapiens GN=PSMD10 PE=4 SV=1 - [B1AJY5_HUMAN]          | 6.25    | 8.11  | 2  | 2  | 2   | 0.590 | 0.401 |
| Q06323 | Proteasome activator complex subunit 1 OS=Homo sapiens GN=PSME1 PE=1 SV=1 - [PSME1_HUMAN]                                 | 102.94  | 46.99 | 13 | 13 | 33  | 3.067 | 1.364 |
| Q9UL46 | Proteasome activator complex subunit 2 OS=Homo sapiens GN=PSME2 PE=1 SV=4 - [PSME2_HUMAN]                                 | 76.44   | 26.36 | 8  | 8  | 21  | 2.151 | 1.336 |
| P25786 | Proteasome subunit alpha type-1 OS=Homo sapiens GN=PSMA1 PE=1 SV=1 - [PSA1_HUMAN]                                         | 200.52  | 49.81 | 15 | 15 | 62  | 2.716 | 1.815 |
| P25787 | Proteasome subunit alpha type-2 OS=Homo sapiens GN=PSMA2 PE=1 SV=2 - [PSA2_HUMAN]                                         | 47.08   | 30.77 | 7  | 7  | 15  | 2.287 | 1.732 |
| P25788 | Proteasome subunit alpha type-3 OS=Homo sapiens GN=PSMA3 PE=1 SV=2 - [PSA3_HUMAN]                                         | 180.21  | 38.82 | 12 | 12 | 55  | 2.712 | 1.638 |
| P25789 | Proteasome subunit alpha type-4 OS=Homo sapiens GN=PSMA4 PE=1 SV=1 - [PSA4_HUMAN]                                         | 92.59   | 39.08 | 11 | 11 | 29  | 2.055 | 1.741 |
| P28066 | Proteasome subunit alpha type-5 OS=Homo sapiens GN=PSMA5 PE=1 SV=3 - [PSA5_HUMAN]                                         | 119.13  | 34.02 | 7  | 7  | 37  | 2.803 | 1.661 |
| P60900 | Proteasome subunit alpha type-6 OS=Homo sapiens GN=PSMA6 PE=1 SV=1 - [PSA6_HUMAN]                                         | 110.91  | 51.63 | 13 | 13 | 32  | 3.356 | 1.954 |
| O14818 | Proteasome subunit alpha type-7 OS=Homo sapiens GN=PSMA7 PE=1 SV=1 - [PSA7_HUMAN]                                         | 93.15   | 38.31 | 10 | 10 | 28  | 2.921 | 1.817 |
| P20618 | Proteasome subunit beta type-1 OS=Homo sapiens GN=PSMB1 PE=1 SV=2 - [PSB1_HUMAN]                                          | 57.30   | 41.08 | 8  | 8  | 19  | 2.764 | 1.859 |
| P49721 | Proteasome subunit beta type-2 OS=Homo sapiens GN=PSMB2 PE=1 SV=1 - [PSB2_HUMAN]                                          | 55.52   | 17.91 | 6  | 6  | 18  | 2.327 | 1.644 |
| P49720 | Proteasome subunit beta type-3 OS=Homo sapiens GN=PSMB3 PE=1 SV=2 - [PSB3_HUMAN]                                          | 34.54   | 16.59 | 4  | 4  | 11  | 2.797 | 1.937 |
| P28070 | Proteasome subunit beta type-4 OS=Homo sapiens GN=PSMB4 PE=1 SV=4 - [PSB4_HUMAN]                                          | 50.08   | 20.45 | 4  | 4  | 14  | 3.065 | 1.836 |
| P28074 | Proteasome subunit beta type-5 OS=Homo sapiens GN=PSMB5 PE=1 SV=3 - [PSB5_HUMAN]                                          | 109.88  | 39.92 | 10 | 10 | 32  | 2.875 | 1.594 |
| P28072 | Proteasome subunit beta type-6 OS=Homo sapiens GN=PSMB6 PE=1 SV=4 - [PSB6_HUMAN]                                          | 59.06   | 17.57 | 5  | 5  | 17  | 2.764 | 1.773 |
| Q99436 | Proteasome subunit beta type-7 OS=Homo sapiens GN=PSMB7 PE=1 SV=1 - [PSB7_HUMAN]                                          | 70.67   | 21.30 | 8  | 8  | 21  | 3.496 | 1.928 |
| Q5VYK3 | Proteasome-associated protein ECM29 homolog OS=Homo sapiens GN=ECM29 PE=1 SV=2 - [ECM29_HUMAN]                            | 11.84   | 1.84  | 4  | 4  | 4   | 0.860 | 0.484 |
| P11171 | Protein 4.1 OS=Homo sapiens GN=EPB41 PE=1 SV=4 - [41_HUMAN]                                                               | 1234.38 | 44.44 | 8  | 44 | 389 | 3.289 | 3.928 |
| O14744 | Protein arginine N-methyltransferase 5 OS=Homo sapiens GN=PRMT5 PE=1 SV=4 - [ANM5_HUMAN]                                  | 20.48   | 10.83 | 7  | 7  | 7   | 1.372 | 1.590 |
| Q9UKV8 | Protein argonaute-2 OS=Homo sapiens GN=EIF2C2 PE=1 SV=3 - [AGO2_HUMAN]                                                    | 279.08  | 42.49 | 31 | 31 | 88  | 4.027 | 3.638 |
| Q9UKY7 | Protein CDV3 homolog OS=Homo sapiens GN=CDV3 PE=1 SV=1 - [CDV3_HUMAN]                                                     | 15.55   | 15.12 | 3  | 3  | 5   | 0.200 | 0.248 |
| Q5TDH0 | Protein DDI1 homolog 2 OS=Homo sapiens GN=DDI2 PE=1 SV=1 - [DDI2_HUMAN]                                                   | 56.94   | 28.32 | 9  | 9  | 17  | 1.169 | 1.695 |
| P13667 | Protein disulfide-isomerase A4 OS=Homo sapiens GN=PDIA4 PE=1 SV=2 - [PDIA4_HUMAN]                                         | 44.23   | 18.29 | 10 | 10 | 14  | 0.959 | 1.098 |
| P07237 | Protein disulfide-isomerase OS=Homo sapiens GN=P4HB PE=1 SV=3 - [PDIA1_HUMAN]                                             | 201.00  | 41.54 | 25 | 25 | 62  | 1.034 | 0.874 |
| Q99497 | Protein DJ-1 OS=Homo sapiens GN=PARK7 PE=1 SV=2 - [PARK7_HUMAN]                                                           | 12.46   | 15.34 | 3  | 3  | 4   | 0.086 | 0.270 |
| P49257 | Protein ERGIC-53 OS=Homo sapiens GN=LMAN1 PE=1 SV=2 - [LMAN1_HUMAN]                                                       | 51.99   | 20.98 | 9  | 9  | 15  | 0.785 | 1.030 |
| Q9NRY5 | Protein FAM114A2 OS=Homo sapiens GN=FAM114A2 PE=1 SV=4 - [F1142_HUMAN]                                                    | 7.75    | 5.15  | 2  | 2  | 2   | 0.296 | 1.043 |
| Q96RT1 | Protein LAP2 OS=Homo sapiens GN=ERBB2IP PE=1 SV=2 - [LAP2_HUMAN]                                                          | 25.60   | 3.54  | 5  | 5  | 8   | 0.757 | 0.502 |
| Q9NUP9 | Protein lin-7 homolog C OS=Homo sapiens GN=LIN7C PE=1 SV=1 - [LIN7C_HUMAN]                                                | 12.65   | 12.18 | 3  | 3  | 4   | 1.525 | 1.108 |
| Q92508 | Protein PIEZO1 OS=Homo sapiens GN=FAM38A PE=1 SV=4 - [PIEZ1_HUMAN]                                                        | 40.32   | 3.69  | 7  | 8  | 12  | 4.326 | 3.870 |
| Q08AM6 | Protein VAC14 homolog OS=Homo sapiens GN=VAC14 PE=1 SV=1 - [VAC14_HUMAN]                                                  | 9.27    | 4.86  | 2  | 3  | 3   | 1.566 | 0.921 |

|        |                                                                                                                             |        |       |    |    |    |       |       |
|--------|-----------------------------------------------------------------------------------------------------------------------------|--------|-------|----|----|----|-------|-------|
| O75695 | Protein XRP2 OS=Homo sapiens GN=RP2 PE=1 SV=4 - [XRP2_HUMAN]                                                                | 35.38  | 14.86 | 6  | 6  | 11 | 1.607 | 1.388 |
| P00491 | Purine nucleoside phosphorylase OS=Homo sapiens GN=PNP PE=1 SV=2 - [PNPH_HUMAN]                                             | 15.75  | 9.69  | 3  | 3  | 5  | 0.250 | 0.795 |
| Q9Y315 | Putative deoxyribose-phosphate aldolase OS=Homo sapiens GN=DERA PE=1 SV=2 - [DEOC_HUMAN]                                    | 44.00  | 32.39 | 8  | 9  | 13 | 3.774 | 3.128 |
| Q5HYI5 | Putative uncharacterized protein DKFZp313C1541 OS=Homo sapiens GN=DKFZp313C1541 PE=2 SV=1 - [Q5HYI5_HUMAN]                  | 25.48  | 28.71 | 2  | 5  | 7  | 1.544 | 1.159 |
| P30613 | Pyruvate kinase isozymes R/L OS=Homo sapiens GN=PKLR PE=1 SV=2 - [KPYR_HUMAN]                                               | 55.14  | 21.95 | 11 | 11 | 17 | 0.287 | 0.786 |
| P50395 | Rab GDP dissociation inhibitor beta OS=Homo sapiens GN=GDI2 PE=1 SV=2 - [GDIB_HUMAN]                                        | 12.49  | 8.99  | 3  | 4  | 4  | 0.328 | 0.629 |
| Q96NA2 | Rab-interacting lysosomal protein OS=Homo sapiens GN=RILP PE=1 SV=1 - [RILP_HUMAN]                                          | 10.98  | 7.48  | 3  | 3  | 3  | 0.181 | 0.403 |
| P35241 | Radixin OS=Homo sapiens GN=RDX PE=1 SV=1 - [RADI_HUMAN]                                                                     | 161.08 | 30.70 | 14 | 26 | 49 | 1.886 | 2.414 |
| Q9UHA4 | Ragulator complex protein LAMTOR3 OS=Homo sapiens GN=LAMTOR3 PE=1 SV=1 - [LOR3_HUMAN]                                       | 7.62   | 20.97 | 2  | 2  | 2  | 0.180 | 0.335 |
| P46060 | Ran GTPase-activating protein 1 OS=Homo sapiens GN=RANGAP1 PE=1 SV=1 - [RAGP1_HUMAN]                                        | 14.48  | 7.67  | 4  | 4  | 4  | 0.739 | 1.082 |
| P43487 | Ran-specific GTPase-activating protein OS=Homo sapiens GN=RANBP1 PE=1 SV=1 - [RANG_HUMAN]                                   | 18.30  | 13.43 | 3  | 3  | 5  | 0.256 | 1.105 |
| P63000 | Ras-related C3 botulinum toxin substrate 1 OS=Homo sapiens GN=RAC1 PE=1 SV=1 - [RAC1_HUMAN]                                 | 132.59 | 42.71 | 9  | 10 | 40 | 2.099 | 2.215 |
| P61026 | Ras-related protein Rab-10 OS=Homo sapiens GN=RAB10 PE=1 SV=1 - [RAB10_HUMAN]                                               | 103.38 | 34.00 | 5  | 8  | 32 | 0.630 | 0.641 |
| P62491 | Ras-related protein Rab-11A OS=Homo sapiens GN=RAB11A PE=1 SV=3 - [RB11A_HUMAN]                                             | 27.45  | 23.61 | 5  | 5  | 8  | 0.203 | 0.201 |
| P61106 | Ras-related protein Rab-14 OS=Homo sapiens GN=RAB14 PE=1 SV=4 - [RAB14_HUMAN]                                               | 41.33  | 20.00 | 3  | 4  | 12 | 0.356 | 0.477 |
| P62820 | Ras-related protein Rab-1A OS=Homo sapiens GN=RAB1A PE=1 SV=3 - [RAB1A_HUMAN]                                               | 95.66  | 35.61 | 4  | 9  | 28 | 0.674 | 1.030 |
| Q9H0U4 | Ras-related protein Rab-1B OS=Homo sapiens GN=RAB1B PE=1 SV=1 - [RAB1B_HUMAN]                                               | 107.07 | 34.33 | 3  | 8  | 31 | 0.596 | 0.557 |
| Q9UL25 | Ras-related protein Rab-21 OS=Homo sapiens GN=RAB21 PE=1 SV=3 - [RAB21_HUMAN]                                               | 19.46  | 14.67 | 3  | 3  | 6  | 0.911 | 0.905 |
| P61019 | Ras-related protein Rab-2A OS=Homo sapiens GN=RAB2A PE=1 SV=1 - [RAB2A_HUMAN]                                               | 27.38  | 28.30 | 2  | 5  | 8  | 1.258 | 0.916 |
| Q15286 | Ras-related protein Rab-35 OS=Homo sapiens GN=RAB35 PE=1 SV=1 - [RAB35_HUMAN]                                               | 83.01  | 32.34 | 5  | 7  | 23 | 1.432 | 1.578 |
| P61020 | Ras-related protein Rab-5B OS=Homo sapiens GN=RAB5B PE=1 SV=1 - [RAB5B_HUMAN]                                               | 48.85  | 33.02 | 3  | 6  | 14 | 1.058 | 1.072 |
| P51148 | Ras-related protein Rab-5C OS=Homo sapiens GN=RAB5C PE=1 SV=2 - [RAB5C_HUMAN]                                               | 74.42  | 36.57 | 4  | 6  | 19 | 0.727 | 0.807 |
| P51149 | Ras-related protein Rab-7a OS=Homo sapiens GN=RAB7A PE=1 SV=1 - [RAB7A_HUMAN]                                               | 69.26  | 58.45 | 12 | 12 | 20 | 0.142 | 0.143 |
| P61006 | Ras-related protein Rab-8A OS=Homo sapiens GN=RAB8A PE=1 SV=1 - [RAB8A_HUMAN]                                               | 97.86  | 51.69 | 6  | 13 | 28 | 1.096 | 1.103 |
| Q92930 | Ras-related protein Rab-8B OS=Homo sapiens GN=RAB8B PE=1 SV=2 - [RAB8B_HUMAN]                                               | 90.87  | 45.41 | 3  | 10 | 27 | 0.582 | 0.729 |
| P11233 | Ras-related protein Ral-A OS=Homo sapiens GN=RALA PE=1 SV=1 - [RALA_HUMAN]                                                  | 60.07  | 24.27 | 5  | 5  | 17 | 1.590 | 1.790 |
| P62834 | Ras-related protein Rap-1A OS=Homo sapiens GN=RAP1A PE=1 SV=1 - [RAP1A_HUMAN]                                               | 105.47 | 36.96 | 2  | 7  | 32 | 1.230 | 1.754 |
| P61225 | Ras-related protein Rap-2b OS=Homo sapiens GN=RAP2B PE=1 SV=1 - [RAP2B_HUMAN]                                               | 67.67  | 33.33 | 4  | 6  | 21 | 1.119 | 0.961 |
| Q00765 | Receptor expression-enhancing protein 5 OS=Homo sapiens GN=REEP5 PE=1 SV=3 - [REEP5_HUMAN]                                  | 47.22  | 11.11 | 4  | 4  | 13 | 1.895 | 1.118 |
| Q96TC7 | Regulator of microtubule dynamics protein 3 OS=Homo sapiens GN=FAM82A2 PE=1 SV=2 - [RMD3_HUMAN]                             | 27.69  | 11.49 | 5  | 5  | 8  | 0.122 | 0.174 |
| Q8TC12 | Retinol dehydrogenase 11 OS=Homo sapiens GN=RDH11 PE=1 SV=2 - [RDH11_HUMAN]                                                 | 19.85  | 17.92 | 5  | 5  | 6  | 0.355 | 0.312 |
| O75116 | Rho-associated protein kinase 2 OS=Homo sapiens GN=ROCK2 PE=1 SV=4 - [ROCK2_HUMAN]                                          | 11.66  | 2.88  | 3  | 4  | 4  | 0.994 | 0.924 |
| P84095 | Rho-related GTP-binding protein RhoG OS=Homo sapiens GN=RHOG PE=1 SV=1 - [RHOG_HUMAN]                                       | 34.17  | 28.80 | 6  | 7  | 10 | 0.170 | 0.146 |
| P60891 | Ribose-phosphate pyrophosphokinase 1 OS=Homo sapiens GN=PRPS1 PE=1 SV=2 - [PRPS1_HUMAN]                                     | 63.30  | 33.96 | 6  | 10 | 20 | 2.459 | 1.719 |
| Q5VVC8 | Ribosomal protein L11 (Fragment) OS=Homo sapiens GN=RPL11 PE=2 SV=1 - [Q5VVC8_HUMAN]                                        | 11.76  | 16.09 | 3  | 3  | 4  | 0.170 | 0.183 |
| E7EQV9 | Ribosomal protein L15 OS=Homo sapiens GN=RPL15 PE=3 SV=1 - [E7EQV9_HUMAN]                                                   | 18.20  | 21.84 | 3  | 3  | 5  | 0.344 | 0.177 |
| B3KTM6 | Ribosomal protein L5, isoform CRA_b OS=Homo sapiens GN=RPL5 PE=2 SV=1 - [B3KTM6_HUMAN]                                      | 21.72  | 12.96 | 4  | 4  | 7  | 0.321 | 0.156 |
| Q5JR95 | Ribosomal protein S8 OS=Homo sapiens GN=RPS8 PE=4 SV=1 - [Q5JR95_HUMAN]                                                     | 12.75  | 16.49 | 3  | 3  | 4  | 0.076 | 0.118 |
| Q9Y3A5 | Ribosome maturation protein SBDS OS=Homo sapiens GN=SBDS PE=1 SV=4 - [SBDS_HUMAN]                                           | 20.43  | 14.40 | 5  | 5  | 6  | 1.134 | 1.646 |
| Q9P2E9 | Ribosome-binding protein 1 OS=Homo sapiens GN=RRBP1 PE=1 SV=4 - [RRBP1_HUMAN]                                               | 36.27  | 18.44 | 6  | 7  | 10 | 0.097 | 0.152 |
| O00442 | RNA 3'-terminal phosphate cyclase OS=Homo sapiens GN=RTCD1 PE=1 SV=1 - [RTC1_HUMAN]                                         | 18.53  | 4.92  | 3  | 3  | 5  | 0.698 | 0.939 |
| Q96PK6 | RNA-binding protein 14 OS=Homo sapiens GN=RBM14 PE=1 SV=2 - [RBM14_HUMAN]                                                   | 5.99   | 3.14  | 2  | 2  | 2  | 0.438 | 0.428 |
| Q3B7A4 | RPLP0 protein OS=Homo sapiens GN=RPLP0 PE=2 SV=1 - [Q3B7A4_HUMAN]                                                           | 38.72  | 19.22 | 4  | 4  | 12 | 0.293 | 0.200 |
| Q7L7Q6 | RTN4 OS=Homo sapiens GN=RTN4 PE=2 SV=1 - [Q7L7Q6_HUMAN]                                                                     | 28.04  | 11.53 | 3  | 3  | 8  | 0.339 | 0.316 |
| Q9Y265 | RuvB-like 1 OS=Homo sapiens GN=RUVBL1 PE=1 SV=1 - [RUVBL1_HUMAN]                                                            | 33.86  | 16.67 | 7  | 7  | 9  | 0.777 | 1.318 |
| Q9Y230 | RuvB-like 2 OS=Homo sapiens GN=RUVBL2 PE=1 SV=3 - [RUVBL2_HUMAN]                                                            | 72.26  | 30.24 | 14 | 14 | 21 | 0.770 | 1.261 |
| P0C7P3 | Schlafen family member 14 OS=Homo sapiens GN=SLFN14 PE=2 SV=2 - [SLN14_HUMAN]                                               | 6.84   | 1.64  | 2  | 2  | 2  | 0.410 | 0.277 |
| Q13228 | Selenium-binding protein 1 OS=Homo sapiens GN=SELENBP1 PE=1 SV=2 - [SBP1_HUMAN]                                             | 9.24   | 6.36  | 3  | 3  | 3  | 0.615 | 0.593 |
| O75326 | Semaphorin-7A OS=Homo sapiens GN=SEMA7A PE=1 SV=1 - [SEM7A_HUMAN]                                                           | 33.45  | 11.56 | 8  | 8  | 11 | 5.814 | 3.986 |
| D6RGI3 | Septin 11, isoform CRA_b OS=Homo sapiens GN=SEPT11 PE=3 SV=1 - [D6RGI3_HUMAN]                                               | 27.02  | 13.18 | 3  | 5  | 8  | 0.050 | 0.213 |
| A8MYA6 | Serine hydroxymethyltransferase OS=Homo sapiens GN=SHMT1 PE=3 SV=1 - [A8MYA6_HUMAN]                                         | 5.47   | 3.36  | 2  | 2  | 2  | 1.944 | 1.866 |
| B7Z9F1 | Serine hydroxymethyltransferase OS=Homo sapiens GN=SHMT2 PE=2 SV=1 - [B7Z9F1_HUMAN]                                         | 21.43  | 11.80 | 6  | 6  | 7  | 0.153 | 0.223 |
| O95747 | Serine/threonine-protein kinase OSR1 OS=Homo sapiens GN=OXSR1 PE=1 SV=1 - [OXSR1_HUMAN]                                     | 30.73  | 16.13 | 7  | 8  | 9  | 0.330 | 0.700 |
| Q9H2K8 | Serine/threonine-protein kinase TAO3 OS=Homo sapiens GN=TAOK3 PE=1 SV=2 - [TAOK3_HUMAN]                                     | 9.39   | 5.23  | 4  | 4  | 4  | 0.550 | 0.602 |
| P67775 | Serine/threonine-protein phosphatase 2A catalytic subunit alpha isoform OS=Homo sapiens GN=PPP2CA PE=1 SV=1 - [PP2AA_HUMAN] | 12.47  | 10.03 | 4  | 4  | 4  | 0.826 | 1.357 |
| Q9UPN7 | Serine/threonine-protein phosphatase 6 regulatory subunit 1 OS=Homo sapiens GN=PPP6R1 PE=1 SV=5 - [PP6R1_HUMAN]             | 5.20   | 2.95  | 2  | 2  | 2  | 2.107 | 1.146 |

|        |                                                                                                                                               |         |       |     |     |      |        |       |
|--------|-----------------------------------------------------------------------------------------------------------------------------------------------|---------|-------|-----|-----|------|--------|-------|
| B4DDZ8 | Serine/threonine-protein phosphatase OS=Homo sapiens GN=PPP5C PE=2 SV=1 - [B4DDZ8_HUMAN]                                                      | 20.00   | 11.52 | 5   | 5   | 6    | 1.549  | 1.921 |
| P02787 | Serotransferrin OS=Homo sapiens GN=TF PE=1 SV=3 - [TRFE_HUMAN]                                                                                | 124.97  | 34.53 | 22  | 22  | 39   | 0.095  | 0.174 |
| P02768 | Serum albumin OS=Homo sapiens GN=ALB PE=1 SV=2 - [ALBU_HUMAN]                                                                                 | 113.54  | 33.33 | 19  | 19  | 31   | 6.604  | 4.214 |
| P49591 | Seryl-tRNA synthetase, cytoplasmic OS=Homo sapiens GN=SARS PE=1 SV=3 - [SYSC_HUMAN]                                                           | 36.18   | 20.04 | 9   | 9   | 11   | 0.130  | 0.361 |
| O75368 | SH3 domain-binding glutamic acid-rich-like protein OS=Homo sapiens GN=SH3BGRL PE=1 SV=1 - [SH3L1_HUMAN]                                       | 25.42   | 45.61 | 5   | 5   | 8    | 1.476  | 2.649 |
| Q9H9B4 | Sideroflexin-1 OS=Homo sapiens GN=SFXN1 PE=1 SV=4 - [SFXN1_HUMAN]                                                                             | 14.33   | 12.42 | 4   | 4   | 4    | 0.100  | 0.292 |
| O76094 | Signal recognition particle 72 kDa protein OS=Homo sapiens GN=SRP72 PE=1 SV=3 - [SRP72_HUMAN]                                                 | 9.48    | 4.17  | 2   | 2   | 3    | 0.333  | 0.318 |
| P49458 | Signal recognition particle 9 kDa protein OS=Homo sapiens GN=SRP9 PE=1 SV=2 - [SRP09_HUMAN]                                                   | 6.38    | 22.09 | 2   | 2   | 2    | 0.029  | 0.135 |
| Q9Y5M8 | Signal recognition particle receptor subunit beta OS=Homo sapiens GN=SRPRB PE=1 SV=3 - [SRPRB_HUMAN]                                          | 8.83    | 11.81 | 2   | 2   | 3    | 0.068  | 0.169 |
| Q8N3X5 | Similar to ATPase, Ca++ transporting, cardiac muscle, fast twitch 1 (Fragment) OS=Homo sapiens PE=2 SV=1 - [Q8N3X5_HUMAN]                     | 5.45    | 2.01  | 2   | 2   | 2    | 0.368  | 0.377 |
| Q8NHG7 | Small VCP/p97-interacting protein OS=Homo sapiens GN=SVIP PE=2 SV=1 - [SVIP_HUMAN]                                                            | 29.54   | 41.56 | 3   | 3   | 8    | 1.017  | 0.862 |
| P54709 | Sodium/potassium-transporting ATPase subunit beta-3 OS=Homo sapiens GN=ATP1B3 PE=1 SV=1 - [AT1B3_HUMAN]                                       | 22.88   | 14.70 | 4   | 4   | 7    | 0.115  | 0.100 |
| P11166 | Solute carrier family 2, facilitated glucose transporter member 1 OS=Homo sapiens GN=SLC2A1 PE=1 SV=2 - [GTR1_HUMAN]                          | 375.01  | 14.02 | 8   | 8   | 111  | 1.803  | 2.627 |
| Q9NP59 | Solute carrier family 40 member 1 OS=Homo sapiens GN=SLC40A1 PE=1 SV=1 - [S40A1_HUMAN]                                                        | 26.03   | 7.53  | 4   | 4   | 8    | 6.283  | 5.448 |
| Q00796 | Sorbitol dehydrogenase OS=Homo sapiens GN=SORD PE=1 SV=4 - [DHSO_HUMAN]                                                                       | 97.24   | 32.49 | 12  | 12  | 32   | 12.996 | 2.030 |
| Q9Y512 | Sorting and assembly machinery component 50 homolog OS=Homo sapiens GN=SAMM50 PE=1 SV=3 - [SAM50_HUMAN]                                       | 11.79   | 6.82  | 3   | 3   | 4    | 0.191  | 0.211 |
| P02549 | Spectrin alpha chain, erythrocyte OS=Homo sapiens GN=SPTA1 PE=1 SV=5 - [SPTA1_HUMAN]                                                          | 6080.81 | 61.35 | 164 | 165 | 1848 | 4.681  | 4.164 |
| P11277 | Spectrin beta chain, erythrocyte OS=Homo sapiens GN=SPTB PE=1 SV=5 - [SPTB1_HUMAN]                                                            | 5690.80 | 69.21 | 153 | 154 | 1726 | 4.470  | 4.109 |
| B4E241 | Splicing factor, arginine/serine-rich 3, isoform CRA_a OS=Homo sapiens GN=SRSF3 PE=2 SV=1 - [B4E241_HUMAN]                                    | 8.68    | 20.16 | 3   | 3   | 3    | 0.138  | 0.222 |
| P23246 | Splicing factor, proline- and glutamine-rich OS=Homo sapiens GN=SFPQ PE=1 SV=2 - [SFPQ_HUMAN]                                                 | 21.68   | 10.33 | 6   | 6   | 7    | 0.210  | 0.230 |
| Q9H2G2 | STE20-like serine/threonine-protein kinase OS=Homo sapiens GN=SLK PE=1 SV=1 - [SLK_HUMAN]                                                     | 28.52   | 7.04  | 8   | 9   | 9    | 0.448  | 0.511 |
| Q9C0K7 | STE20-related kinase adapter protein beta OS=Homo sapiens GN=STRADB PE=1 SV=1 - [STRAB_HUMAN]                                                 | 5.56    | 4.31  | 2   | 2   | 2    | 1.405  | 1.121 |
| P31948 | Stress-induced-phosphoprotein 1 OS=Homo sapiens GN=STIP1 PE=1 SV=1 - [STIP1_HUMAN]                                                            | 237.02  | 45.12 | 33  | 33  | 74   | 0.593  | 0.939 |
| O95347 | Structural maintenance of chromosomes protein 2 OS=Homo sapiens GN=SMC2 PE=1 SV=2 - [SMC2_HUMAN]                                              | 27.67   | 6.43  | 8   | 8   | 8    | 0.387  | 0.343 |
| P53597 | Succinyl-CoA ligase [GDP-forming] subunit alpha, mitochondrial OS=Homo sapiens GN=SUCLG1 PE=1 SV=4 - [SUCA_HUMAN]                             | 6.44    | 6.94  | 2   | 2   | 2    | 0.120  | 0.144 |
| Q96199 | Succinyl-CoA ligase [GDP-forming] subunit beta, mitochondrial OS=Homo sapiens GN=SUCLG2 PE=1 SV=2 - [SUCB2_HUMAN]                             | 13.17   | 6.25  | 4   | 4   | 4    | 0.043  | 0.150 |
| P55809 | Succinyl-CoA:3-ketoacid-coenzyme A transferase 1, mitochondrial OS=Homo sapiens GN=OXCT1 PE=1 SV=1 - [SCOT1_HUMAN]                            | 23.84   | 9.62  | 5   | 5   | 7    | 0.242  | 0.176 |
| Q9Y6N5 | Sulfide:quinone oxidoreductase, mitochondrial OS=Homo sapiens GN=SQRDL PE=1 SV=1 - [SQRD_HUMAN]                                               | 41.16   | 20.89 | 9   | 9   | 12   | 0.027  | 0.105 |
| P00441 | Superoxide dismutase [Cu-Zn] OS=Homo sapiens GN=SOD1 PE=1 SV=2 - [SODC_HUMAN]                                                                 | 24.47   | 31.17 | 6   | 6   | 8    | 0.116  | 0.145 |
| Q99536 | Synaptic vesicle membrane protein VAT-1 homolog OS=Homo sapiens GN=VAT1 PE=1 SV=2 - [VAT1_HUMAN]                                              | 11.82   | 10.69 | 3   | 3   | 4    | 0.024  | 0.192 |
| O00161 | Synaptosomal-associated protein 23 OS=Homo sapiens GN=SNAP23 PE=1 SV=1 - [SNP23_HUMAN]                                                        | 35.78   | 31.28 | 7   | 7   | 11   | 0.655  | 1.022 |
| A8MX0  | Syntaxin 4A (Placental), isoform CRA_c OS=Homo sapiens GN=STX4 PE=2 SV=1 - [A8MX0_HUMAN]                                                      | 18.83   | 13.22 | 3   | 3   | 5    | 1.161  | 0.867 |
| O15400 | Syntaxin-7 OS=Homo sapiens GN=STX7 PE=1 SV=4 - [STX7_HUMAN]                                                                                   | 73.02   | 29.89 | 8   | 8   | 22   | 0.829  | 0.859 |
| O00186 | Syntaxin-binding protein 3 OS=Homo sapiens GN=STXB3 PE=1 SV=2 - [STXB3_HUMAN]                                                                 | 43.66   | 14.36 | 9   | 9   | 14   | 1.142  | 0.729 |
| P17987 | T-complex protein 1 subunit alpha OS=Homo sapiens GN=TCP1 PE=1 SV=1 - [TCPA_HUMAN]                                                            | 189.39  | 38.31 | 21  | 21  | 58   | 0.532  | 0.755 |
| P50991 | T-complex protein 1 subunit delta OS=Homo sapiens GN=CCT4 PE=1 SV=4 - [TCPD_HUMAN]                                                            | 207.77  | 45.45 | 21  | 22  | 64   | 0.627  | 0.799 |
| P48643 | T-complex protein 1 subunit epsilon OS=Homo sapiens GN=CCT5 PE=1 SV=1 - [TCPE_HUMAN]                                                          | 218.83  | 44.55 | 25  | 26  | 68   | 0.531  | 0.755 |
| P50990 | T-complex protein 1 subunit theta OS=Homo sapiens GN=CCT8 PE=1 SV=4 - [TCPQ_HUMAN]                                                            | 320.72  | 56.20 | 30  | 30  | 94   | 0.510  | 0.724 |
| P40227 | T-complex protein 1 subunit zeta OS=Homo sapiens GN=CCT6A PE=1 SV=3 - [TCPZ_HUMAN]                                                            | 211.12  | 33.90 | 21  | 21  | 65   | 0.579  | 0.783 |
| Q5TCU6 | Talin 1 OS=Homo sapiens GN=TLN1 PE=2 SV=1 - [Q5TCU6_HUMAN]                                                                                    | 164.22  | 17.09 | 40  | 40  | 50   | 0.250  | 0.283 |
| Q9ULP9 | TBC1 domain family member 24 OS=Homo sapiens GN=TBC1D24 PE=1 SV=2 - [TBC24_HUMAN]                                                             | 15.95   | 9.12  | 5   | 5   | 5    | 2.451  | 6.044 |
| Q59G71 | Tensin variant (Fragment) OS=Homo sapiens PE=2 SV=1 - [Q59G71_HUMAN]                                                                          | 66.14   | 21.99 | 16  | 16  | 20   | 1.159  | 0.405 |
| O43396 | Thioredoxin-like protein 1 OS=Homo sapiens GN=TXNL1 PE=1 SV=3 - [TXNL1_HUMAN]                                                                 | 13.66   | 14.19 | 3   | 3   | 4    | 0.518  | 0.525 |
| Q9H3N1 | Thioredoxin-related transmembrane protein 1 OS=Homo sapiens GN=TMX1 PE=1 SV=1 - [TMX1_HUMAN]                                                  | 25.00   | 14.64 | 5   | 5   | 7    | 0.870  | 0.704 |
| P26639 | Threonyl-tRNA synthetase, cytoplasmic OS=Homo sapiens GN=TARS PE=1 SV=3 - [SYTC_HUMAN]                                                        | 47.18   | 15.91 | 12  | 12  | 16   | 0.137  | 0.157 |
| P23919 | Thymidylate kinase OS=Homo sapiens GN=DTYMK PE=1 SV=4 - [KTHY_HUMAN]                                                                          | 10.71   | 9.91  | 2   | 2   | 3    | 0.500  | 0.307 |
| P37837 | Transaldolase OS=Homo sapiens GN=TALDO1 PE=1 SV=2 - [TALDO_HUMAN]                                                                             | 26.58   | 19.88 | 7   | 7   | 8    | 0.076  | 0.420 |
| P23193 | Transcription elongation factor A protein 1 OS=Homo sapiens GN=TCEA1 PE=1 SV=2 - [TCEA1_HUMAN]                                                | 13.71   | 7.31  | 2   | 2   | 4    | 1.965  | 1.064 |
| B8ZZU8 | Transcription elongation factor B (SIII), polypeptide 2 (18kDa, elongin B), isoform CRA_b OS=Homo sapiens GN=TCEB2 PE=4 SV=1 - [B8ZZU8_HUMAN] | 13.31   | 25.66 | 3   | 3   | 4    | 0.410  | 0.589 |
| Q00059 | Transcription factor A, mitochondrial OS=Homo sapiens GN=TFAM PE=1 SV=1 - [TFAM_HUMAN]                                                        | 14.40   | 16.26 | 5   | 5   | 5    | 0.039  | 0.117 |
| Q00577 | Transcriptional activator protein Pur-alpha OS=Homo sapiens GN=PURA PE=1 SV=2 - [PURA_HUMAN]                                                  | 16.35   | 10.56 | 4   | 4   | 5    | 0.818  | 0.667 |
| P02786 | Transferrin receptor protein 1 OS=Homo sapiens GN=TFRC PE=1 SV=2 - [TFR1_HUMAN]                                                               | 256.20  | 38.68 | 27  | 27  | 79   | 0.295  | 0.088 |
| P61586 | Transforming protein RhoA OS=Homo sapiens GN=RHOA PE=1 SV=1 - [RHOA_HUMAN]                                                                    | 28.36   | 30.05 | 6   | 6   | 9    | 1.018  | 2.277 |
| P55072 | Transitional endoplasmic reticulum ATPase OS=Homo sapiens GN=VCP PE=1 SV=4 - [TERA_HUMAN]                                                     | 568.95  | 44.79 | 35  | 35  | 175  | 1.797  | 1.742 |
| P49770 | Translation initiation factor eIF-2B subunit beta OS=Homo sapiens GN=EIF2B2 PE=1 SV=3 - [EI2BB_HUMAN]                                         | 11.16   | 10.54 | 4   | 4   | 4    | 0.371  | 0.408 |
| Q92616 | Translational activator GCN1 OS=Homo sapiens GN=GCN1L1 PE=1 SV=6 - [GCN1L_HUMAN]                                                              | 6.18    | 0.60  | 2   | 2   | 2    | 0.090  | 0.081 |

|        |                                                                                                                                  |         |       |    |    |     |       |       |
|--------|----------------------------------------------------------------------------------------------------------------------------------|---------|-------|----|----|-----|-------|-------|
| Q99442 | Translocation protein SEC62 OS=Homo sapiens GN=SEC62 PE=1 SV=1 - [SEC62_HUMAN]                                                   | 10.99   | 5.26  | 2  | 2  | 3   | 0.338 | 0.255 |
| Q9HD45 | Transmembrane 9 superfamily member 3 OS=Homo sapiens GN=TM9SF3 PE=1 SV=2 - [TM9S3_HUMAN]                                         | 5.82    | 3.23  | 2  | 2  | 2   | 1.335 | 0.894 |
| B7Z1P7 | Transmembrane and coiled-coil domain family 2, isoform CRA_d OS=Homo sapiens GN=TMCC2 PE=2 SV=1 - [B7Z1P7_HUMAN]                 | 157.62  | 29.48 | 7  | 17 | 52  | 0.546 | 0.211 |
| Q13445 | Transmembrane emp24 domain-containing protein 1 OS=Homo sapiens GN=TMED1 PE=1 SV=1 - [TMED1_HUMAN]                               | 8.17    | 11.45 | 2  | 2  | 2   | 1.000 | 1.273 |
| P49755 | Transmembrane emp24 domain-containing protein 10 OS=Homo sapiens GN=TMED10 PE=1 SV=2 - [TMEDA_HUMAN]                             | 20.92   | 22.37 | 4  | 4  | 7   | 1.122 | 1.131 |
| Q9BVK6 | Transmembrane emp24 domain-containing protein 9 OS=Homo sapiens GN=TMED9 PE=1 SV=2 - [TMED9_HUMAN]                               | 23.18   | 16.60 | 4  | 6  | 8   | 1.027 | 1.163 |
| Q9BVC6 | Transmembrane protein 109 OS=Homo sapiens GN=TMEM109 PE=1 SV=1 - [TM109_HUMAN]                                                   | 15.28   | 8.64  | 2  | 2  | 4   | 0.312 | 0.401 |
| Q5T3F8 | Transmembrane protein 63B OS=Homo sapiens GN=TMEM63B PE=1 SV=1 - [TM63B_HUMAN]                                                   | 9.83    | 3.13  | 3  | 3  | 3   | 1.117 | 0.793 |
| Q92973 | Transportin-1 OS=Homo sapiens GN=TNPO1 PE=1 SV=2 - [TNPO1_HUMAN]                                                                 | 10.16   | 2.90  | 3  | 3  | 3   | 0.336 | 0.675 |
| P53007 | Tricarboxylate transport protein, mitochondrial OS=Homo sapiens GN=SLC25A1 PE=1 SV=2 - [TXTP_HUMAN]                              | 8.92    | 8.36  | 3  | 3  | 3   | 0.162 | 0.256 |
| P40939 | Trifunctional enzyme subunit alpha, mitochondrial OS=Homo sapiens GN=HADHA PE=1 SV=2 - [ECHA_HUMAN]                              | 60.25   | 17.43 | 14 | 14 | 19  | 0.247 | 0.146 |
| P55084 | Trifunctional enzyme subunit beta, mitochondrial OS=Homo sapiens GN=HADHB PE=1 SV=3 - [ECHB_HUMAN]                               | 36.72   | 14.35 | 7  | 7  | 11  | 0.106 | 0.112 |
| P60174 | Triosephosphate isomerase OS=Homo sapiens GN=TP1I PE=1 SV=2 - [TPIS_HUMAN]                                                       | 46.18   | 34.94 | 8  | 8  | 14  | 0.069 | 0.250 |
| Q5SRJ5 | Tripartite motif-containing 10 OS=Homo sapiens GN=TRIM10 PE=2 SV=1 - [Q5SRJ5_HUMAN]                                              | 12.31   | 8.86  | 3  | 3  | 3   | 0.151 | 0.421 |
| Q8NG06 | Tripartite motif-containing protein 58 OS=Homo sapiens GN=TRIM58 PE=2 SV=2 - [TRI58_HUMAN]                                       | 41.26   | 24.07 | 10 | 11 | 13  | 0.077 | 0.202 |
| P29144 | Tripeptidyl-peptidase 2 OS=Homo sapiens GN=TPP2 PE=1 SV=4 - [TPP2_HUMAN]                                                         | 107.68  | 19.38 | 25 | 25 | 34  | 1.353 | 1.231 |
| P28289 | Tropomodulin-1 OS=Homo sapiens GN=TMOD1 PE=1 SV=1 - [TMOD1_HUMAN]                                                                | 211.85  | 52.65 | 22 | 22 | 69  | 3.518 | 3.770 |
| D9YZV7 | Tropomyosin 1 (Alpha) isoform 6 OS=Homo sapiens GN=TPM1 PE=3 SV=1 - [D9YZV7_HUMAN]                                               | 260.23  | 47.76 | 2  | 15 | 76  | 2.520 | 2.409 |
| Q5VU58 | Tropomyosin 3 OS=Homo sapiens GN=TPM3 PE=2 SV=1 - [Q5VU58_HUMAN]                                                                 | 388.59  | 59.27 | 2  | 20 | 115 | 2.842 | 3.021 |
| Q5VU59 | Tropomyosin 3 OS=Homo sapiens GN=TPM3 PE=2 SV=1 - [Q5VU59_HUMAN]                                                                 | 403.59  | 63.79 | 4  | 22 | 120 | 3.198 | 2.880 |
| Q5LJ98 | TROVE domain family, member 2 OS=Homo sapiens GN=TROVE2 PE=2 SV=1 - [Q5LJ98_HUMAN]                                               | 28.32   | 11.39 | 7  | 7  | 9   | 0.118 | 0.228 |
| P23381 | Tryptophanyl-tRNA synthetase, cytoplasmic OS=Homo sapiens GN=WARS PE=1 SV=2 - [SYWC_HUMAN]                                       | 8.71    | 7.01  | 3  | 3  | 3   | 0.404 | 0.436 |
| Q9Y3Q8 | TSC22 domain family protein 4 OS=Homo sapiens GN=TSC22D4 PE=1 SV=2 - [T22D4_HUMAN]                                               | 27.47   | 16.96 | 6  | 6  | 7   | 0.949 | 0.932 |
| Q9BQE3 | Tubulin alpha-1C chain OS=Homo sapiens GN=TUBA1C PE=1 SV=1 - [TBA1C_HUMAN]                                                       | 82.89   | 34.30 | 4  | 13 | 26  | 0.074 | 0.102 |
| B1AH89 | Tubulin tyrosine ligase-like family, member 12 OS=Homo sapiens GN=TLL12 PE=4 SV=1 - [B1AH89_HUMAN]                               | 10.52   | 5.50  | 3  | 3  | 3   | 0.514 | 0.993 |
| P25445 | Tumor necrosis factor receptor superfamily member 6 OS=Homo sapiens GN=FAS PE=1 SV=1 - [TNR6_HUMAN]                              | 11.92   | 6.27  | 2  | 2  | 3   | 1.518 | 0.750 |
| P54577 | Tyrosyl-tRNA synthetase, cytoplasmic OS=Homo sapiens GN=YARS PE=1 SV=4 - [SYYC_HUMAN]                                            | 77.02   | 33.52 | 19 | 19 | 24  | 0.294 | 0.554 |
| P45974 | Ubiquitin carboxyl-terminal hydrolase 5 OS=Homo sapiens GN=USP5 PE=1 SV=2 - [UBP5_HUMAN]                                         | 34.27   | 10.02 | 8  | 8  | 10  | 0.830 | 1.812 |
| A6NJA2 | Ubiquitin carboxyl-terminal hydrolase OS=Homo sapiens GN=USP14 PE=3 SV=1 - [A6NJA2_HUMAN]                                        | 58.45   | 25.27 | 12 | 12 | 17  | 0.520 | 0.847 |
| E9PCQ3 | Ubiquitin carboxyl-terminal hydrolase OS=Homo sapiens GN=USP15 PE=3 SV=2 - [E9PCQ3_HUMAN]                                        | 41.52   | 9.94  | 11 | 11 | 13  | 0.942 | 1.245 |
| B7WPF4 | Ubiquitin carboxyl-terminal hydrolase OS=Homo sapiens GN=USP24 PE=3 SV=2 - [B7WPF4_HUMAN]                                        | 6.81    | 0.65  | 2  | 2  | 2   | 0.314 | 0.579 |
| Q9C0C9 | Ubiquitin-conjugating enzyme E2 O OS=Homo sapiens GN=UBE2O PE=1 SV=3 - [UBE2O_HUMAN]                                             | 126.16  | 17.88 | 21 | 21 | 37  | 2.200 | 3.904 |
| P22314 | Ubiquitin-like modifier-activating enzyme 1 OS=Homo sapiens GN=UBA1 PE=1 SV=3 - [UBA1_HUMAN]                                     | 44.04   | 9.55  | 9  | 9  | 13  | 0.464 | 1.381 |
| Q9NYU2 | UDP-glucose:glycoprotein glucosyltransferase 1 OS=Homo sapiens GN=UGGT1 PE=1 SV=3 - [UGGG1_HUMAN]                                | 73.25   | 13.31 | 20 | 20 | 23  | 0.846 | 0.812 |
| O15294 | UDP-N-acetylglucosamine--peptide N-acetylglucosaminyltransferase 110 kDa subunit OS=Homo sapiens GN=OGT PE=1 SV=3 - [OGT1_HUMAN] | 9.76    | 2.87  | 3  | 3  | 3   | 0.382 | 0.373 |
| Q5T446 | Uncharacterized protein (Fragment) OS=Homo sapiens GN=UROD PE=2 SV=1 - [Q5T446_HUMAN]                                            | 6.74    | 13.47 | 2  | 2  | 2   | 0.386 | 0.908 |
| E9PBW0 | Uncharacterized protein OS=Homo sapiens GN=ABCC5 PE=3 SV=1 - [E9PBW0_HUMAN]                                                      | 5.79    | 2.39  | 2  | 2  | 2   | 1.371 | 0.832 |
| B7Z9I1 | Uncharacterized protein OS=Homo sapiens GN=ACADM PE=2 SV=1 - [B7Z9I1_HUMAN]                                                      | 38.60   | 18.70 | 7  | 7  | 11  | 0.295 | 0.218 |
| E9PE82 | Uncharacterized protein OS=Homo sapiens GN=ACADS PE=4 SV=1 - [E9PE82_HUMAN]                                                      | 5.98    | 3.19  | 2  | 2  | 2   | 0.075 | 0.197 |
| C9JGQ9 | Uncharacterized protein OS=Homo sapiens GN=ACHE PE=4 SV=1 - [C9JGQ9_HUMAN]                                                       | 19.30   | 9.98  | 5  | 5  | 6   | 2.742 | 1.406 |
| F5H2A5 | Uncharacterized protein OS=Homo sapiens GN=ACO2 PE=4 SV=1 - [F5H2A5_HUMAN]                                                       | 11.92   | 6.18  | 4  | 4  | 4   | 0.117 | 0.176 |
| E7ERD7 | Uncharacterized protein OS=Homo sapiens GN=ACSL6 PE=4 SV=1 - [E7ERD7_HUMAN]                                                      | 30.95   | 12.41 | 9  | 9  | 10  | 1.079 | 1.118 |
| F5H6F4 | Uncharacterized protein OS=Homo sapiens GN=ACSS1 PE=4 SV=1 - [F5H6F4_HUMAN]                                                      | 10.25   | 4.40  | 2  | 3  | 3   | 0.040 | 0.160 |
| F5GXS2 | Uncharacterized protein OS=Homo sapiens GN=ACTN4 PE=4 SV=1 - [F5GXS2_HUMAN]                                                      | 12.11   | 6.91  | 3  | 3  | 4   | 0.695 | 0.862 |
| F5H3P5 | Uncharacterized protein OS=Homo sapiens GN=ACTR3 PE=3 SV=1 - [F5H3P5_HUMAN]                                                      | 23.39   | 17.42 | 5  | 5  | 7   | 0.335 | 0.683 |
| E7ET30 | Uncharacterized protein OS=Homo sapiens GN=AK3 PE=3 SV=1 - [E7ET30_HUMAN]                                                        | 8.03    | 11.23 | 2  | 2  | 3   | 0.167 | 0.218 |
| F5H328 | Uncharacterized protein OS=Homo sapiens GN=ALDH5A1 PE=3 SV=1 - [F5H328_HUMAN]                                                    | 12.34   | 6.26  | 3  | 3  | 4   | 0.246 | 0.216 |
| E7EVE3 | Uncharacterized protein OS=Homo sapiens GN=ANK1 PE=4 SV=1 - [E7EVE3_HUMAN]                                                       | 2863.52 | 46.92 | 81 | 88 | 856 | 3.627 | 3.927 |
| F5H754 | Uncharacterized protein OS=Homo sapiens GN=ANKFY1 PE=4 SV=1 - [F5H754_HUMAN]                                                     | 9.40    | 2.34  | 3  | 3  | 3   | 1.305 | 1.241 |
| F5H0H0 | Uncharacterized protein OS=Homo sapiens GN=AP2M1 PE=4 SV=1 - [F5H0H0_HUMAN]                                                      | 44.86   | 18.57 | 9  | 9  | 14  | 0.744 | 0.647 |
| E9PC21 | Uncharacterized protein OS=Homo sapiens GN=AQP1 PE=3 SV=1 - [E9PC21_HUMAN]                                                       | 33.28   | 17.53 | 2  | 2  | 11  | 5.165 | 3.412 |
| B7ZB63 | Uncharacterized protein OS=Homo sapiens GN=ARF3 PE=2 SV=1 - [B7ZB63_HUMAN]                                                       | 7.00    | 13.19 | 2  | 2  | 2   | 0.298 | 0.282 |
| F5GY14 | Uncharacterized protein OS=Homo sapiens GN=ARL6IP1 PE=4 SV=1 - [F5GY14_HUMAN]                                                    | 17.31   | 15.48 | 3  | 3  | 6   | 0.618 | 0.534 |
| E9PER8 | Uncharacterized protein OS=Homo sapiens GN=ARL6IP5 PE=4 SV=1 - [E9PER8_HUMAN]                                                    | 11.82   | 15.06 | 3  | 3  | 4   | 0.675 | 0.568 |
| B4DLQ7 | Uncharacterized protein OS=Homo sapiens GN=ARPC1A PE=2 SV=1 - [B4DLQ7_HUMAN]                                                     | 6.18    | 4.64  | 2  | 2  | 2   | 0.452 | 0.773 |
| E7ERV9 | Uncharacterized protein OS=Homo sapiens GN=ASAH1 PE=4 SV=1 - [E7ERV9_HUMAN]                                                      | 8.56    | 8.52  | 3  | 3  | 3   | 0.173 | 0.139 |

|        |                                                                                |        |       |    |    |    |       |       |
|--------|--------------------------------------------------------------------------------|--------|-------|----|----|----|-------|-------|
| C9JAL9 | Uncharacterized protein OS=Homo sapiens GN=ASPCR1 PE=4 SV=1 - [C9JAL9_HUMAN]   | 7.04   | 6.02  | 2  | 2  | 2  | 0.589 | 1.084 |
| F5GWY2 | Uncharacterized protein OS=Homo sapiens GN=ATIC PE=4 SV=1 - [F5GWY2_HUMAN]     | 6.09   | 3.38  | 2  | 2  | 2  | 0.652 | 0.962 |
| F5H6I7 | Uncharacterized protein OS=Homo sapiens GN=ATL3 PE=4 SV=1 - [F5H6I7_HUMAN]     | 39.88  | 9.94  | 6  | 6  | 13 | 1.398 | 1.057 |
| F5H3A1 | Uncharacterized protein OS=Homo sapiens GN=ATP1A1 PE=3 SV=1 - [F5H3A1_HUMAN]   | 84.03  | 19.35 | 19 | 19 | 23 | 0.527 | 0.218 |
| E9PN17 | Uncharacterized protein OS=Homo sapiens GN=ATP5L PE=4 SV=1 - [E9PN17_HUMAN]    | 33.73  | 60.53 | 4  | 5  | 9  | 0.052 | 0.113 |
| F5H569 | Uncharacterized protein OS=Homo sapiens GN=ATP6V0A1 PE=4 SV=1 - [F5H569_HUMAN] | 29.15  | 6.69  | 6  | 6  | 8  | 0.319 | 0.308 |
| B7Z1R5 | Uncharacterized protein OS=Homo sapiens GN=ATP6V1A PE=2 SV=1 - [B7Z1R5_HUMAN]  | 93.34  | 25.51 | 15 | 15 | 28 | 0.207 | 0.442 |
| A8MQ60 | Uncharacterized protein OS=Homo sapiens GN=ATP6V1C1 PE=4 SV=1 - [A8MQ60_HUMAN] | 13.12  | 10.16 | 4  | 4  | 4  | 0.139 | 0.129 |
| A8MUN4 | Uncharacterized protein OS=Homo sapiens GN=ATP6V1E1 PE=2 SV=1 - [A8MUN4_HUMAN] | 42.58  | 28.06 | 7  | 7  | 14 | 0.265 | 0.486 |
| E9PGE6 | Uncharacterized protein OS=Homo sapiens GN=ATP6V1H PE=4 SV=1 - [E9PGE6_HUMAN]  | 16.29  | 9.15  | 4  | 4  | 5  | 0.174 | 0.517 |
| B4DXE2 | Uncharacterized protein OS=Homo sapiens GN=BAG2 PE=2 SV=1 - [B4DXE2_HUMAN]     | 28.28  | 32.58 | 5  | 5  | 7  | 0.574 | 0.655 |
| A6NME1 | Uncharacterized protein OS=Homo sapiens GN=BCAP29 PE=2 SV=2 - [A6NME1_HUMAN]   | 12.83  | 19.35 | 3  | 3  | 4  | 1.032 | 0.775 |
| E9PL10 | Uncharacterized protein OS=Homo sapiens GN=BTF3L4 PE=4 SV=1 - [E9PL10_HUMAN]   | 5.31   | 5.52  | 2  | 2  | 2  | 0.152 | 0.203 |
| F5H2W0 | Uncharacterized protein OS=Homo sapiens GN=C18orf8 PE=4 SV=1 - [F5H2W0_HUMAN]  | 6.06   | 3.28  | 2  | 2  | 2  | 0.089 | 0.187 |
| E9PCW3 | Uncharacterized protein OS=Homo sapiens GN=C22orf28 PE=4 SV=1 - [E9PCW3_HUMAN] | 9.66   | 6.28  | 3  | 3  | 3  | 0.224 | 0.178 |
| E7EWT6 | Uncharacterized protein OS=Homo sapiens GN=CALCOCO1 PE=4 SV=2 - [E7EWT6_HUMAN] | 22.71  | 10.49 | 6  | 6  | 6  | 0.362 | 0.985 |
| E9PAQ6 | Uncharacterized protein OS=Homo sapiens GN=CCT3 PE=3 SV=1 - [E9PAQ6_HUMAN]     | 239.56 | 38.60 | 24 | 24 | 67 | 0.569 | 0.742 |
| E9PB22 | Uncharacterized protein OS=Homo sapiens GN=CD47 PE=4 SV=1 - [E9PB22_HUMAN]     | 48.39  | 8.97  | 3  | 3  | 14 | 5.260 | 5.309 |
| E9PNW4 | Uncharacterized protein OS=Homo sapiens GN=CD59 PE=4 SV=1 - [E9PNW4_HUMAN]     | 41.39  | 27.78 | 3  | 3  | 12 | 1.259 | 2.748 |
| E9PP50 | Uncharacterized protein OS=Homo sapiens GN=CFL1 PE=4 SV=1 - [E9PP50_HUMAN]     | 13.10  | 14.37 | 3  | 3  | 4  | 0.207 | 0.149 |
| E9PDB9 | Uncharacterized protein OS=Homo sapiens GN=CLCN7 PE=4 SV=1 - [E9PDB9_HUMAN]    | 7.50   | 2.56  | 2  | 2  | 2  | 0.165 | 0.276 |
| B4DIN1 | Uncharacterized protein OS=Homo sapiens GN=CLTA PE=2 SV=1 - [B4DIN1_HUMAN]     | 101.53 | 23.91 | 3  | 8  | 31 | 1.010 | 0.678 |
| F5GXH1 | Uncharacterized protein OS=Homo sapiens GN=COPG PE=4 SV=1 - [F5GXH1_HUMAN]     | 8.25   | 3.93  | 3  | 3  | 3  | 0.401 | 0.328 |
| E7EM64 | Uncharacterized protein OS=Homo sapiens GN=COPS6 PE=4 SV=1 - [E7EM64_HUMAN]    | 13.13  | 9.20  | 3  | 3  | 4  | 1.018 | 1.549 |
| A8MZ71 | Uncharacterized protein OS=Homo sapiens GN=COX7A2 PE=4 SV=1 - [A8MZ71_HUMAN]   | 6.71   | 27.71 | 2  | 2  | 2  | 0.027 | 0.092 |
| D6R9Z7 | Uncharacterized protein OS=Homo sapiens GN=COX7C PE=4 SV=1 - [D6R9Z7_HUMAN]    | 13.91  | 32.14 | 2  | 2  | 4  | 0.272 | 0.307 |
| E9PDY4 | Uncharacterized protein OS=Homo sapiens GN=CR1 PE=4 SV=1 - [E9PDY4_HUMAN]      | 6.40   | 2.37  | 2  | 2  | 2  | 1.885 | 1.083 |
| E7EU96 | Uncharacterized protein OS=Homo sapiens GN=CSNK2A1 PE=4 SV=1 - [E7EU96_HUMAN]  | 8.40   | 10.39 | 3  | 3  | 3  | 1.266 | 1.373 |
| E9PP21 | Uncharacterized protein OS=Homo sapiens GN=CSR1 PE=4 SV=1 - [E9PP21_HUMAN]     | 21.83  | 36.88 | 4  | 4  | 6  | 0.143 | 0.383 |
| F5GWW0 | Uncharacterized protein OS=Homo sapiens GN=CTSB PE=3 SV=1 - [F5GWW0_HUMAN]     | 22.93  | 20.88 | 5  | 5  | 7  | 0.243 | 0.433 |
| B4E358 | Uncharacterized protein OS=Homo sapiens GN=CTTN PE=2 SV=1 - [B4E358_HUMAN]     | 9.74   | 10.19 | 2  | 3  | 3  | 0.029 | 0.202 |
| E7EWR0 | Uncharacterized protein OS=Homo sapiens GN=CUL1 PE=3 SV=1 - [E7EWR0_HUMAN]     | 40.58  | 13.80 | 12 | 12 | 13 | 1.407 | 1.548 |
| A8MSH7 | Uncharacterized protein OS=Homo sapiens GN=CUL4A PE=3 SV=1 - [A8MSH7_HUMAN]    | 30.50  | 10.14 | 8  | 8  | 9  | 0.496 | 1.169 |
| B4DWD7 | Uncharacterized protein OS=Homo sapiens GN=CYBRD1 PE=2 SV=1 - [B4DWD7_HUMAN]   | 29.68  | 9.65  | 2  | 2  | 8  | 2.132 | 1.578 |
| C9JFR7 | Uncharacterized protein OS=Homo sapiens GN=CYCS PE=3 SV=1 - [C9JFR7_HUMAN]     | 43.19  | 47.52 | 6  | 6  | 13 | 0.045 | 0.211 |
| E9PFS5 | Uncharacterized protein OS=Homo sapiens GN=DCTN1 PE=4 SV=1 - [E9PFS5_HUMAN]    | 86.12  | 16.91 | 21 | 21 | 26 | 0.973 | 0.834 |
| C9J8R4 | Uncharacterized protein OS=Homo sapiens GN=DCUN1D1 PE=4 SV=1 - [C9J8R4_HUMAN]  | 7.68   | 16.41 | 2  | 2  | 2  | 0.418 | 1.341 |
| E7EWT1 | Uncharacterized protein OS=Homo sapiens GN=DDOST PE=4 SV=1 - [E7EWT1_HUMAN]    | 9.17   | 6.44  | 3  | 3  | 3  | 0.454 | 0.297 |
| B4DME8 | Uncharacterized protein OS=Homo sapiens GN=DDX1 PE=2 SV=1 - [B4DME8_HUMAN]     | 11.23  | 3.43  | 2  | 2  | 3  | 0.056 | 0.090 |
| B7Z6B8 | Uncharacterized protein OS=Homo sapiens GN=DECR1 PE=2 SV=1 - [B7Z6B8_HUMAN]    | 45.59  | 27.91 | 8  | 8  | 13 | 0.186 | 0.102 |
| E7ERW8 | Uncharacterized protein OS=Homo sapiens GN=DIAPH1 PE=4 SV=1 - [E7ERW8_HUMAN]   | 103.64 | 14.98 | 19 | 21 | 33 | 0.649 | 1.268 |
| F5H7M3 | Uncharacterized protein OS=Homo sapiens GN=DLAT PE=3 SV=1 - [F5H7M3_HUMAN]     | 10.30  | 6.22  | 3  | 3  | 3  | 0.257 | 0.273 |
| E3W974 | Uncharacterized protein OS=Homo sapiens GN=DNPEP PE=4 SV=2 - [E3W974_HUMAN]    | 12.07  | 19.15 | 2  | 2  | 3  | 1.416 | 1.560 |
| E7ETW8 | Uncharacterized protein OS=Homo sapiens GN=DYSF PE=4 SV=1 - [E7ETW8_HUMAN]     | 28.47  | 4.45  | 7  | 8  | 9  | 0.172 | 0.314 |
| A6NJH9 | Uncharacterized protein OS=Homo sapiens GN=EIF1AY PE=4 SV=1 - [A6NJH9_HUMAN]   | 20.80  | 23.62 | 3  | 3  | 7  | 0.060 | 0.140 |
| B4DV79 | Uncharacterized protein OS=Homo sapiens GN=EIF3B PE=2 SV=1 - [B4DV79_HUMAN]    | 34.30  | 11.38 | 8  | 8  | 10 | 0.131 | 0.092 |
| B4DVQ5 | Uncharacterized protein OS=Homo sapiens GN=EIF3C PE=2 SV=1 - [B4DVQ5_HUMAN]    | 42.54  | 13.81 | 12 | 12 | 13 | 0.105 | 0.154 |
| B4DYY1 | Uncharacterized protein OS=Homo sapiens GN=EIF3D PE=2 SV=1 - [B4DYY1_HUMAN]    | 12.64  | 7.01  | 3  | 3  | 4  | 0.074 | 0.141 |
| B7ZAM9 | Uncharacterized protein OS=Homo sapiens GN=EIF3K PE=2 SV=1 - [B7ZAM9_HUMAN]    | 15.94  | 15.17 | 3  | 3  | 5  | 0.063 | 0.103 |
| E7EPC9 | Uncharacterized protein OS=Homo sapiens GN=EIF4B PE=4 SV=1 - [E7EPC9_HUMAN]    | 51.15  | 18.06 | 10 | 10 | 15 | 0.408 | 0.596 |
| E7EX73 | Uncharacterized protein OS=Homo sapiens GN=EIF4G1 PE=4 SV=1 - [E7EX73_HUMAN]   | 85.06  | 14.90 | 22 | 22 | 26 | 0.157 | 0.390 |
| E9PPD9 | Uncharacterized protein OS=Homo sapiens GN=EPB41L2 PE=4 SV=1 - [E9PPD9_HUMAN]  | 29.86  | 9.62  | 9  | 9  | 9  | 1.309 | 1.498 |
| B4DT43 | Uncharacterized protein OS=Homo sapiens GN=ETFA PE=2 SV=1 - [B4DT43_HUMAN]     | 46.61  | 36.27 | 9  | 9  | 15 | 0.160 | 0.099 |
| B4E0X8 | Uncharacterized protein OS=Homo sapiens GN=FUBP1 PE=2 SV=1 - [B4E0X8_HUMAN]    | 9.66   | 4.29  | 2  | 3  | 3  | 0.103 | 0.119 |
| B4DR70 | Uncharacterized protein OS=Homo sapiens GN=FUS PE=2 SV=1 - [B4DR70_HUMAN]      | 25.50  | 13.29 | 3  | 5  | 7  | 0.064 | 0.104 |
| F5H4D6 | Uncharacterized protein OS=Homo sapiens GN=G3BP1 PE=4 SV=1 - [F5H4D6_HUMAN]    | 11.70  | 11.97 | 2  | 2  | 4  | 0.404 | 0.369 |

|        |                                                                                |        |       |    |    |    |       |       |
|--------|--------------------------------------------------------------------------------|--------|-------|----|----|----|-------|-------|
| E7EQZ3 | Uncharacterized protein OS=Homo sapiens GN=GSPT1 PE=4 SV=1 - [E7EQZ3_HUMAN]    | 26.06  | 9.28  | 8  | 8  | 8  | 0.188 | 0.418 |
| F5H5Y5 | Uncharacterized protein OS=Homo sapiens GN=HGS PE=4 SV=1 - [F5H5Y5_HUMAN]      | 18.94  | 8.17  | 5  | 6  | 6  | 0.733 | 0.687 |
| E9PCK0 | Uncharacterized protein OS=Homo sapiens GN=HK1 PE=3 SV=1 - [E9PCK0_HUMAN]      | 22.89  | 5.75  | 6  | 6  | 7  | 0.081 | 0.157 |
| F5H345 | Uncharacterized protein OS=Homo sapiens GN=HMBS PE=4 SV=1 - [F5H345_HUMAN]     | 23.75  | 14.24 | 5  | 5  | 7  | 0.354 | 0.320 |
| A6NGP5 | Uncharacterized protein OS=Homo sapiens GN=HN1L PE=2 SV=2 - [A6NGP5_HUMAN]     | 9.88   | 14.04 | 2  | 2  | 3  | 0.499 | 0.396 |
| D6R9P3 | Uncharacterized protein OS=Homo sapiens GN=HNRNPAB PE=4 SV=1 - [D6R9P3_HUMAN]  | 23.15  | 13.57 | 3  | 4  | 8  | 0.113 | 0.194 |
| B2R603 | Uncharacterized protein OS=Homo sapiens GN=HNRNPC PE=2 SV=1 - [B2R603_HUMAN]   | 24.40  | 17.16 | 5  | 5  | 6  | 0.259 | 0.208 |
| B4DTC3 | Uncharacterized protein OS=Homo sapiens GN=HNRNPD PE=2 SV=1 - [B4DTC3_HUMAN]   | 23.21  | 17.82 | 5  | 6  | 8  | 0.302 | 0.217 |
| E9PCY7 | Uncharacterized protein OS=Homo sapiens GN=HNRNPH1 PE=4 SV=1 - [E9PCY7_HUMAN]  | 30.66  | 21.21 | 7  | 7  | 9  | 0.245 | 0.201 |
| B3KX72 | Uncharacterized protein OS=Homo sapiens GN=HNRNPU PE=2 SV=1 - [B3KX72_HUMAN]   | 10.89  | 5.73  | 4  | 4  | 4  | 0.224 | 0.121 |
| B7Z4V2 | Uncharacterized protein OS=Homo sapiens GN=HSPA9 PE=2 SV=1 - [B7Z4V2_HUMAN]    | 163.05 | 35.79 | 23 | 24 | 48 | 0.088 | 0.112 |
| B4DY72 | Uncharacterized protein OS=Homo sapiens GN=HSPH1 PE=2 SV=1 - [B4DY72_HUMAN]    | 12.05  | 4.73  | 2  | 3  | 4  | 0.224 | 0.360 |
| E9PD66 | Uncharacterized protein OS=Homo sapiens GN=HUWE1 PE=4 SV=1 - [E9PD66_HUMAN]    | 104.10 | 5.85  | 25 | 25 | 31 | 0.806 | 0.708 |
| B4DFG4 | Uncharacterized protein OS=Homo sapiens GN=ILF3 PE=2 SV=1 - [B4DFG4_HUMAN]     | 13.32  | 5.93  | 3  | 3  | 4  | 0.311 | 0.287 |
| C9J406 | Uncharacterized protein OS=Homo sapiens GN=IMMT PE=4 SV=1 - [C9J406_HUMAN]     | 134.90 | 30.20 | 23 | 24 | 38 | 0.076 | 0.124 |
| F5H153 | Uncharacterized protein OS=Homo sapiens GN=ITSN1 PE=4 SV=1 - [F5H153_HUMAN]    | 17.78  | 3.80  | 4  | 4  | 5  | 0.287 | 0.388 |
| F5H2Q7 | Uncharacterized protein OS=Homo sapiens GN=KIAA1715 PE=4 SV=1 - [F5H2Q7_HUMAN] | 9.25   | 6.81  | 2  | 2  | 3  | 0.344 | 0.439 |
| C9JYI4 | Uncharacterized protein OS=Homo sapiens GN=KPNA1 PE=4 SV=1 - [C9JYI4_HUMAN]    | 16.19  | 10.37 | 3  | 4  | 5  | 0.520 | 0.607 |
| F5H479 | Uncharacterized protein OS=Homo sapiens GN=LAMTOR1 PE=4 SV=1 - [F5H479_HUMAN]  | 20.55  | 12.12 | 2  | 2  | 6  | 0.101 | 0.139 |
| E9PHS0 | Uncharacterized protein OS=Homo sapiens GN=LANCL1 PE=4 SV=1 - [E9PHS0_HUMAN]   | 14.63  | 13.27 | 3  | 3  | 4  | 4.795 | 1.355 |
| B4DWN1 | Uncharacterized protein OS=Homo sapiens GN=LMAN2 PE=2 SV=1 - [B4DWN1_HUMAN]    | 23.15  | 14.04 | 4  | 4  | 7  | 1.459 | 1.382 |
| B3KXS5 | Uncharacterized protein OS=Homo sapiens GN=LONP1 PE=2 SV=1 - [B3KXS5_HUMAN]    | 55.11  | 14.41 | 13 | 13 | 17 | 0.105 | 0.111 |
| B5MEG9 | Uncharacterized protein OS=Homo sapiens GN=MAP4 PE=4 SV=2 - [B5MEG9_HUMAN]     | 7.37   | 2.81  | 2  | 2  | 2  | 0.321 | 0.205 |
| E9PNT8 | Uncharacterized protein OS=Homo sapiens GN=MTCH2 PE=3 SV=1 - [E9PNT8_HUMAN]    | 10.12  | 23.90 | 3  | 3  | 3  | 0.107 | 0.170 |
| A8MZ22 | Uncharacterized protein OS=Homo sapiens GN=NAP1L4 PE=3 SV=3 - [A8MZ22_HUMAN]   | 68.31  | 25.13 | 9  | 10 | 23 | 1.482 | 2.285 |
| F5GZJ1 | Uncharacterized protein OS=Homo sapiens GN=NCAPD2 PE=4 SV=1 - [F5GZJ1_HUMAN]   | 11.85  | 2.21  | 3  | 3  | 3  | 0.571 | 0.466 |
| B4E189 | Uncharacterized protein OS=Homo sapiens GN=NCAPH PE=2 SV=1 - [B4E189_HUMAN]    | 11.05  | 5.29  | 3  | 3  | 3  | 0.370 | 0.420 |
| E9PC09 | Uncharacterized protein OS=Homo sapiens GN=NCSTN PE=4 SV=1 - [E9PC09_HUMAN]    | 6.66   | 6.23  | 2  | 2  | 2  | 1.013 | 0.747 |
| B4DJ81 | Uncharacterized protein OS=Homo sapiens GN=NDUFS1 PE=2 SV=1 - [B4DJ81_HUMAN]   | 5.32   | 2.29  | 2  | 2  | 2  | 0.058 | 0.182 |
| E9PMX3 | Uncharacterized protein OS=Homo sapiens GN=NDUFV1 PE=4 SV=1 - [E9PMX3_HUMAN]   | 6.62   | 11.24 | 2  | 2  | 2  | 0.434 | 0.293 |
| E9PGQ8 | Uncharacterized protein OS=Homo sapiens GN=NECAP2 PE=4 SV=1 - [E9PGQ8_HUMAN]   | 32.73  | 33.33 | 6  | 6  | 10 | 0.494 | 0.528 |
| E7ERL0 | Uncharacterized protein OS=Homo sapiens GN=NME1 PE=3 SV=1 - [E7ERL0_HUMAN]     | 19.43  | 33.09 | 4  | 4  | 6  | 0.220 | 0.840 |
| E9PFG7 | Uncharacterized protein OS=Homo sapiens GN=OGDH PE=4 SV=1 - [E9PFG7_HUMAN]     | 44.68  | 9.16  | 9  | 9  | 14 | 0.123 | 0.138 |
| E9PBS1 | Uncharacterized protein OS=Homo sapiens GN=PAICS PE=4 SV=1 - [E9PBS1_HUMAN]    | 39.99  | 21.31 | 11 | 11 | 12 | 0.236 | 0.814 |
| B7Z3X5 | Uncharacterized protein OS=Homo sapiens GN=PDHA1 PE=2 SV=1 - [B7Z3X5_HUMAN]    | 18.96  | 12.81 | 5  | 5  | 6  | 0.103 | 0.102 |
| B4DDD7 | Uncharacterized protein OS=Homo sapiens GN=PDHB PE=2 SV=1 - [B4DDD7_HUMAN]     | 21.06  | 9.97  | 3  | 3  | 7  | 0.124 | 0.116 |
| B3KQT9 | Uncharacterized protein OS=Homo sapiens GN=PDIA3 PE=2 SV=1 - [B3KQT9_HUMAN]    | 144.81 | 38.96 | 20 | 20 | 43 | 0.927 | 0.829 |
| B7Z254 | Uncharacterized protein OS=Homo sapiens GN=PDIA6 PE=2 SV=1 - [B7Z254_HUMAN]    | 54.19  | 23.34 | 9  | 9  | 16 | 0.788 | 0.738 |
| C9JW96 | Uncharacterized protein OS=Homo sapiens GN=PHB PE=4 SV=2 - [C9JW96_HUMAN]      | 84.68  | 44.72 | 12 | 12 | 25 | 0.070 | 0.131 |
| E9PBQ1 | Uncharacterized protein OS=Homo sapiens GN=PIP5K1A PE=4 SV=1 - [E9PBQ1_HUMAN]  | 9.47   | 5.17  | 2  | 3  | 3  | 2.586 | 4.123 |
| F5H0R5 | Uncharacterized protein OS=Homo sapiens GN=PIP5K1C PE=4 SV=1 - [F5H0R5_HUMAN]  | 11.76  | 7.97  | 3  | 4  | 4  | 1.438 | 1.020 |
| B4DTE8 | Uncharacterized protein OS=Homo sapiens GN=PLSCR1 PE=2 SV=1 - [B4DTE8_HUMAN]   | 10.20  | 7.17  | 2  | 2  | 3  | 2.482 | 2.451 |
| F5H5K9 | Uncharacterized protein OS=Homo sapiens GN=PNPLA6 PE=4 SV=1 - [F5H5K9_HUMAN]   | 12.17  | 2.31  | 3  | 3  | 4  | 1.080 | 0.796 |
| D6R967 | Uncharacterized protein OS=Homo sapiens GN=PPA2 PE=4 SV=1 - [D6R967_HUMAN]     | 6.47   | 11.52 | 2  | 2  | 2  | 0.023 | 0.150 |
| B4DY76 | Uncharacterized protein OS=Homo sapiens GN=PPOX PE=2 SV=1 - [B4DY76_HUMAN]     | 29.60  | 12.61 | 5  | 5  | 8  | 0.074 | 0.132 |
| F5H3X9 | Uncharacterized protein OS=Homo sapiens GN=PPP2R1A PE=4 SV=1 - [F5H3X9_HUMAN]  | 23.91  | 9.36  | 6  | 6  | 8  | 0.406 | 1.060 |
| E9PKF6 | Uncharacterized protein OS=Homo sapiens GN=PPP6R3 PE=4 SV=1 - [E9PKF6_HUMAN]   | 8.98   | 3.10  | 3  | 3  | 3  | 0.708 | 0.854 |
| E9PH29 | Uncharacterized protein OS=Homo sapiens GN=PRDX3 PE=4 SV=1 - [E9PH29_HUMAN]    | 73.55  | 23.95 | 5  | 5  | 21 | 0.212 | 0.245 |
| A8K318 | Uncharacterized protein OS=Homo sapiens GN=PRKCSH PE=2 SV=1 - [A8K318_HUMAN]   | 71.70  | 20.95 | 13 | 13 | 21 | 0.883 | 0.799 |
| E5RG77 | Uncharacterized protein OS=Homo sapiens GN=PROSC PE=3 SV=1 - [E5RG77_HUMAN]    | 6.62   | 10.53 | 2  | 2  | 2  | 1.508 | 1.962 |
| F5GZ16 | Uncharacterized protein OS=Homo sapiens GN=PSMD2 PE=4 SV=1 - [F5GZ16_HUMAN]    | 176.03 | 28.78 | 26 | 26 | 54 | 1.572 | 0.868 |
| F5H8K4 | Uncharacterized protein OS=Homo sapiens GN=PSMD3 PE=4 SV=1 - [F5H8K4_HUMAN]    | 120.54 | 38.39 | 20 | 20 | 36 | 0.867 | 0.631 |
| B4DZM8 | Uncharacterized protein OS=Homo sapiens GN=PSMD5 PE=2 SV=1 - [B4DZM8_HUMAN]    | 6.18   | 3.47  | 2  | 2  | 2  | 1.186 | 0.781 |
| B4DXI8 | Uncharacterized protein OS=Homo sapiens GN=PSMD7 PE=2 SV=1 - [B4DXI8_HUMAN]    | 35.02  | 22.67 | 5  | 5  | 9  | 1.498 | 0.745 |
| B8ZZI3 | Uncharacterized protein OS=Homo sapiens GN=PTMA PE=4 SV=1 - [B8ZZI3_HUMAN]     | 14.48  | 22.58 | 2  | 2  | 4  | 0.051 | 0.212 |
| A8MZH8 | Uncharacterized protein OS=Homo sapiens GN=PTTG1IP PE=4 SV=1 - [A8MZH8_HUMAN]  | 14.17  | 23.36 | 2  | 2  | 5  | 0.010 | 0.079 |



|        |                                                                                |        |       |    |    |     |       |       |
|--------|--------------------------------------------------------------------------------|--------|-------|----|----|-----|-------|-------|
| B4DNN3 | Uncharacterized protein OS=Homo sapiens GN=QARS PE=2 SV=1 - [B4DNN3_HUMAN]     | 14.60  | 3.86  | 3  | 3  | 5   | 3.987 | 3.643 |
| E9PK89 | Uncharacterized protein OS=Homo sapiens GN=RAB3IL1 PE=4 SV=1 - [E9PK89_HUMAN]  | 5.13   | 15.53 | 2  | 2  | 2   | 0.685 | 0.539 |
| F5GZB1 | Uncharacterized protein OS=Homo sapiens GN=RAB6A PE=3 SV=1 - [F5GZB1_HUMAN]    | 25.45  | 23.24 | 3  | 4  | 8   | 0.320 | 0.373 |
| F5GZU7 | Uncharacterized protein OS=Homo sapiens GN=RABEP1 PE=4 SV=1 - [F5GZU7_HUMAN]   | 11.37  | 3.21  | 4  | 4  | 4   | 0.827 | 1.009 |
| B4DQI8 | Uncharacterized protein OS=Homo sapiens GN=RAP1B PE=2 SV=1 - [B4DQI8_HUMAN]    | 129.65 | 45.45 | 3  | 8  | 42  | 0.898 | 1.077 |
| Q8N8Y7 | Uncharacterized protein OS=Homo sapiens GN=RBMX PE=2 SV=1 - [Q8N8Y7_HUMAN]     | 20.40  | 13.49 | 6  | 6  | 7   | 0.293 | 0.314 |
| D6RBN9 | Uncharacterized protein OS=Homo sapiens GN=RELL1 PE=4 SV=1 - [D6RBN9_HUMAN]    | 3.83   | 10.12 | 2  | 2  | 2   | 2.695 | 1.722 |
| B4DM74 | Uncharacterized protein OS=Homo sapiens GN=RPL18A PE=2 SV=1 - [B4DM74_HUMAN]   | 19.37  | 20.13 | 3  | 3  | 6   | 0.176 | 0.162 |
| C9JXB8 | Uncharacterized protein OS=Homo sapiens GN=RPL24 PE=4 SV=1 - [C9JXB8_HUMAN]    | 23.24  | 33.88 | 4  | 4  | 6   | 0.044 | 0.131 |
| E9PLL6 | Uncharacterized protein OS=Homo sapiens GN=RPL27A PE=3 SV=1 - [E9PLL6_HUMAN]   | 6.66   | 17.59 | 2  | 2  | 2   | 0.108 | 0.162 |
| C9JU56 | Uncharacterized protein OS=Homo sapiens GN=RPL31 PE=4 SV=1 - [C9JU56_HUMAN]    | 17.72  | 28.70 | 4  | 4  | 6   | 0.471 | 0.170 |
| C9K025 | Uncharacterized protein OS=Homo sapiens GN=RPL35A PE=4 SV=1 - [C9K025_HUMAN]   | 14.65  | 29.79 | 3  | 3  | 5   | 0.096 | 0.208 |
| E9PEL3 | Uncharacterized protein OS=Homo sapiens GN=RPL37A PE=4 SV=1 - [E9PEL3_HUMAN]   | 9.16   | 20.00 | 2  | 2  | 3   | 0.140 | 0.120 |
| E9PIZ3 | Uncharacterized protein OS=Homo sapiens GN=RPL8 PE=4 SV=1 - [E9PIZ3_HUMAN]     | 16.82  | 15.84 | 4  | 4  | 5   | 0.206 | 0.109 |
| D6RAN4 | Uncharacterized protein OS=Homo sapiens GN=RPL9 PE=4 SV=1 - [D6RAN4_HUMAN]     | 6.10   | 9.34  | 2  | 2  | 2   | 0.418 | 0.795 |
| D6R910 | Uncharacterized protein OS=Homo sapiens GN=RPS6KA2 PE=4 SV=1 - [D6R910_HUMAN]  | 7.43   | 19.20 | 2  | 2  | 2   | 0.423 | 0.409 |
| C9J9K3 | Uncharacterized protein OS=Homo sapiens GN=RPSA PE=3 SV=1 - [C9J9K3_HUMAN]     | 30.01  | 23.48 | 5  | 5  | 8   | 0.153 | 0.106 |
| F5H774 | Uncharacterized protein OS=Homo sapiens GN=RTN3 PE=4 SV=1 - [F5H774_HUMAN]     | 17.43  | 2.28  | 2  | 2  | 5   | 0.554 | 0.452 |
| F5H3J5 | Uncharacterized protein OS=Homo sapiens GN=S100A4 PE=4 SV=1 - [F5H3J5_HUMAN]   | 5.48   | 17.78 | 2  | 2  | 2   | 0.651 | 0.630 |
| E9PGZ4 | Uncharacterized protein OS=Homo sapiens GN=SACM1L PE=4 SV=1 - [E9PGZ4_HUMAN]   | 25.95  | 10.95 | 6  | 6  | 7   | 1.052 | 1.049 |
| C9JPX0 | Uncharacterized protein OS=Homo sapiens GN=SAFB2 PE=4 SV=2 - [C9JPX0_HUMAN]    | 7.16   | 5.67  | 2  | 2  | 2   | 0.300 | 0.180 |
| E9PEA8 | Uncharacterized protein OS=Homo sapiens GN=SCCPDH PE=4 SV=1 - [E9PEA8_HUMAN]   | 9.29   | 8.30  | 2  | 2  | 3   | 0.932 | 0.581 |
| B7Z5N7 | Uncharacterized protein OS=Homo sapiens GN=SCFD1 PE=2 SV=1 - [B7Z5N7_HUMAN]    | 19.04  | 14.66 | 5  | 5  | 6   | 0.380 | 0.380 |
| E9PBJ5 | Uncharacterized protein OS=Homo sapiens GN=SDHA PE=4 SV=1 - [E9PBJ5_HUMAN]     | 31.25  | 14.61 | 7  | 7  | 9   | 0.281 | 0.186 |
| B5MCX3 | Uncharacterized protein OS=Homo sapiens GN=SEPT2 PE=3 SV=1 - [B5MCX3_HUMAN]    | 24.17  | 17.13 | 5  | 5  | 8   | 0.053 | 0.219 |
| B4DNE4 | Uncharacterized protein OS=Homo sapiens GN=SEPT7 PE=2 SV=1 - [B4DNE4_HUMAN]    | 74.92  | 24.61 | 10 | 11 | 23  | 0.150 | 0.399 |
| A6NMH6 | Uncharacterized protein OS=Homo sapiens GN=SEPT8 PE=3 SV=1 - [A6NMH6_HUMAN]    | 38.57  | 16.28 | 5  | 7  | 11  | 0.114 | 0.360 |
| B4DN87 | Uncharacterized protein OS=Homo sapiens GN=SERPINH1 PE=2 SV=1 - [B4DN87_HUMAN] | 27.80  | 12.85 | 5  | 5  | 8   | 0.325 | 0.209 |
| E7EMJ6 | Uncharacterized protein OS=Homo sapiens GN=SGTA PE=4 SV=1 - [E7EMJ6_HUMAN]     | 6.90   | 7.90  | 2  | 2  | 2   | 0.473 | 0.893 |
| E5RJR5 | Uncharacterized protein OS=Homo sapiens GN=SKP1 PE=4 SV=1 - [E5RJR5_HUMAN]     | 11.36  | 17.79 | 3  | 3  | 3   | 0.626 | 1.269 |
| B7Z844 | Uncharacterized protein OS=Homo sapiens GN=SLC2A14 PE=2 SV=1 - [B7Z844_HUMAN]  | 6.35   | 3.89  | 2  | 2  | 2   | 2.713 | 1.613 |
| B4E2Z3 | Uncharacterized protein OS=Homo sapiens GN=SLC3A2 PE=2 SV=1 - [B4E2Z3_HUMAN]   | 12.18  | 8.22  | 3  | 3  | 3   | 0.058 | 0.090 |
| B7Z6X9 | Uncharacterized protein OS=Homo sapiens GN=SLC43A2 PE=2 SV=1 - [B7Z6X9_HUMAN]  | 19.96  | 7.41  | 3  | 3  | 6   | 1.959 | 1.925 |
| E9PS74 | Uncharacterized protein OS=Homo sapiens GN=SLC43A3 PE=4 SV=1 - [E9PS74_HUMAN]  | 37.29  | 9.97  | 5  | 5  | 12  | 0.876 | 0.443 |
| E9PD53 | Uncharacterized protein OS=Homo sapiens GN=SMC4 PE=4 SV=1 - [E9PD53_HUMAN]     | 27.38  | 6.18  | 8  | 8  | 9   | 0.325 | 0.349 |
| E7EPV7 | Uncharacterized protein OS=Homo sapiens GN=SNCA PE=4 SV=1 - [E7EPV7_HUMAN]     | 43.17  | 69.57 | 7  | 7  | 12  | 0.396 | 0.479 |
| E7ESM6 | Uncharacterized protein OS=Homo sapiens GN=SND1 PE=4 SV=2 - [E7ESM6_HUMAN]     | 78.97  | 19.22 | 17 | 17 | 23  | 0.216 | 0.619 |
| B4DEK4 | Uncharacterized protein OS=Homo sapiens GN=SNX2 PE=2 SV=1 - [B4DEK4_HUMAN]     | 11.32  | 7.71  | 3  | 3  | 3   | 0.753 | 0.801 |
| F5H3C5 | Uncharacterized protein OS=Homo sapiens GN=SOD2 PE=3 SV=1 - [F5H3C5_HUMAN]     | 16.77  | 33.33 | 4  | 4  | 5   | 0.069 | 0.107 |
| F5H7U6 | Uncharacterized protein OS=Homo sapiens GN=SPAG9 PE=4 SV=1 - [F5H7U6_HUMAN]    | 7.15   | 2.50  | 2  | 2  | 2   | 0.575 | 0.593 |
| E7EMJ8 | Uncharacterized protein OS=Homo sapiens GN=SRSF4 PE=4 SV=2 - [E7EMJ8_HUMAN]    | 16.21  | 7.64  | 3  | 3  | 5   | 0.701 | 0.393 |
| C9K0U8 | Uncharacterized protein OS=Homo sapiens GN=SSBP1 PE=4 SV=1 - [C9K0U8_HUMAN]    | 5.33   | 11.57 | 2  | 2  | 2   | 0.139 | 0.292 |
| A6NMU3 | Uncharacterized protein OS=Homo sapiens GN=STAM PE=4 SV=1 - [A6NMU3_HUMAN]     | 9.97   | 12.30 | 3  | 3  | 3   | 0.647 | 0.737 |
| B4E2V5 | Uncharacterized protein OS=Homo sapiens GN=STOM PE=2 SV=1 - [B4E2V5_HUMAN]     | 415.36 | 54.43 | 14 | 14 | 127 | 1.911 | 2.484 |
| B4E1K7 | Uncharacterized protein OS=Homo sapiens GN=STOML2 PE=2 SV=1 - [B4E1K7_HUMAN]   | 42.51  | 27.65 | 8  | 8  | 12  | 0.076 | 0.143 |
| D6RF48 | Uncharacterized protein OS=Homo sapiens GN=STX18 PE=4 SV=1 - [D6RF48_HUMAN]    | 19.48  | 14.29 | 5  | 5  | 6   | 0.293 | 0.421 |
| F5GXG3 | Uncharacterized protein OS=Homo sapiens GN=STXBP2 PE=4 SV=1 - [F5GXG3_HUMAN]   | 13.62  | 6.04  | 4  | 4  | 4   | 0.786 | 0.678 |
| F5GXC8 | Uncharacterized protein OS=Homo sapiens GN=SUCLA2 PE=3 SV=1 - [F5GXC8_HUMAN]   | 6.35   | 6.67  | 2  | 2  | 2   | 1.313 | 0.910 |
| F5GWQ7 | Uncharacterized protein OS=Homo sapiens GN=TAF15 PE=4 SV=1 - [F5GWQ7_HUMAN]    | 12.97  | 16.96 | 2  | 4  | 4   | 0.034 | 0.134 |
| B4DIT7 | Uncharacterized protein OS=Homo sapiens GN=TGM2 PE=2 SV=1 - [B4DIT7_HUMAN]     | 28.62  | 11.06 | 6  | 6  | 9   | 0.436 | 1.343 |
| F5GX39 | Uncharacterized protein OS=Homo sapiens GN=TMED2 PE=3 SV=1 - [F5GX39_HUMAN]    | 21.36  | 31.90 | 4  | 4  | 7   | 0.598 | 0.956 |
| E9PI90 | Uncharacterized protein OS=Homo sapiens GN=TMEM126A PE=4 SV=1 - [E9PI90_HUMAN] | 6.30   | 25.26 | 2  | 2  | 2   | 0.115 | 0.150 |
| B4DZ87 | Uncharacterized protein OS=Homo sapiens GN=TOMM70A PE=2 SV=1 - [B4DZ87_HUMAN]  | 7.52   | 11.58 | 3  | 3  | 3   | 0.745 | 0.147 |
| B4DSE2 | Uncharacterized protein OS=Homo sapiens GN=TPP1 PE=2 SV=1 - [B4DSE2_HUMAN]     | 6.78   | 7.27  | 2  | 2  | 2   | 0.379 | 0.410 |
| F5H897 | Uncharacterized protein OS=Homo sapiens GN=TRAP1 PE=3 SV=1 - [F5H897_HUMAN]    | 30.10  | 8.45  | 5  | 6  | 9   | 0.034 | 0.117 |
| E9PGT1 | Uncharacterized protein OS=Homo sapiens GN=TSN PE=4 SV=1 - [E9PGT1_HUMAN]      | 19.36  | 20.18 | 4  | 4  | 5   | 0.909 | 1.205 |

|        |                                                                                                                    |        |       |    |    |    |       |       |
|--------|--------------------------------------------------------------------------------------------------------------------|--------|-------|----|----|----|-------|-------|
| E9PLH9 | Uncharacterized protein OS=Homo sapiens GN=TSTA3 PE=4 SV=1 - [E9PLH9_HUMAN]                                        | 14.81  | 19.33 | 2  | 2  | 4  | 0.239 | 0.773 |
| F5H265 | Uncharacterized protein OS=Homo sapiens GN=UBC PE=4 SV=1 - [F5H265_HUMAN]                                          | 186.73 | 87.25 | 8  | 8  | 61 | 1.400 | 0.954 |
| E9PJ81 | Uncharacterized protein OS=Homo sapiens GN=UBXN1 PE=4 SV=1 - [E9PJ81_HUMAN]                                        | 22.36  | 28.97 | 6  | 6  | 7  | 0.560 | 0.761 |
| E9PGR0 | Uncharacterized protein OS=Homo sapiens GN=UCHL5 PE=4 SV=1 - [E9PGR0_HUMAN]                                        | 19.20  | 15.14 | 5  | 5  | 6  | 0.642 | 0.347 |
| C9JKD6 | Uncharacterized protein OS=Homo sapiens GN=UGP2 PE=4 SV=1 - [C9JKD6_HUMAN]                                         | 19.16  | 10.04 | 5  | 5  | 6  | 0.847 | 1.130 |
| E5RHG9 | Uncharacterized protein OS=Homo sapiens GN=UQCRB PE=4 SV=1 - [E5RHG9_HUMAN]                                        | 23.27  | 32.89 | 3  | 3  | 6  | 0.366 | 0.231 |
| F5GZ76 | Uncharacterized protein OS=Homo sapiens GN=USO1 PE=4 SV=1 - [F5GZ76_HUMAN]                                         | 5.91   | 2.89  | 2  | 2  | 2  | 1.308 | 0.877 |
| B7Z7T5 | Uncharacterized protein OS=Homo sapiens GN=USP7 PE=2 SV=1 - [B7Z7T5_HUMAN]                                         | 14.98  | 6.76  | 5  | 5  | 5  | 0.706 | 0.761 |
| B0V043 | Uncharacterized protein OS=Homo sapiens GN=VAR5 PE=3 SV=1 - [B0V043_HUMAN]                                         | 27.83  | 7.52  | 9  | 9  | 9  | 0.644 | 0.356 |
| F5H2A7 | Uncharacterized protein OS=Homo sapiens GN=VBP1 PE=4 SV=1 - [F5H2A7_HUMAN]                                         | 5.70   | 10.94 | 2  | 2  | 2  | 0.150 | 0.523 |
| B4DP38 | Uncharacterized protein OS=Homo sapiens GN=WDR77 PE=2 SV=1 - [B4DP38_HUMAN]                                        | 14.30  | 7.19  | 3  | 3  | 4  | 1.884 | 1.898 |
| B7Z6V3 | Uncharacterized protein OS=Homo sapiens GN=WDR81 PE=2 SV=1 - [B7Z6V3_HUMAN]                                        | 5.92   | 3.67  | 2  | 2  | 2  | 0.878 | 0.796 |
| F5GWT4 | Uncharacterized protein OS=Homo sapiens GN=WNK1 PE=4 SV=1 - [F5GWT4_HUMAN]                                         | 71.50  | 9.51  | 19 | 19 | 23 | 0.897 | 0.698 |
| E7ESC6 | Uncharacterized protein OS=Homo sapiens GN=XPO7 PE=4 SV=1 - [E7ESC6_HUMAN]                                         | 156.55 | 25.18 | 26 | 26 | 47 | 0.202 | 0.429 |
| B1AHC7 | Uncharacterized protein OS=Homo sapiens GN=XRCC6 PE=4 SV=1 - [B1AHC7_HUMAN]                                        | 11.98  | 4.67  | 3  | 3  | 4  | 0.201 | 0.092 |
| A1A528 | Uncharacterized protein OS=Homo sapiens GN=ZW10 PE=2 SV=1 - [A1A528_HUMAN]                                         | 7.28   | 2.68  | 2  | 2  | 2  | 0.611 | 0.616 |
| F5GYQ0 | Uncharacterized protein OS=Homo sapiens PE=4 SV=1 - [F5GYQ0_HUMAN]                                                 | 6.07   | 9.57  | 2  | 2  | 2  | 1.610 | 0.972 |
| F6WSP1 | Uncharacterized protein OS=Homo sapiens PE=4 SV=1 - [F6WSP1_HUMAN]                                                 | 6.19   | 7.95  | 2  | 2  | 2  | 0.891 | 0.830 |
| C4AM82 | Uncharacterized protein OS=Homo sapiens PE=4 SV=3 - [C4AM82_HUMAN]                                                 | 6.11   | 6.62  | 2  | 2  | 2  | 0.796 | 1.123 |
| Q969H8 | UPF0556 protein C19orf10 OS=Homo sapiens GN=C19orf10 PE=1 SV=1 - [CS010_HUMAN]                                     | 10.83  | 15.03 | 2  | 2  | 3  | 1.388 | 1.009 |
| Q9Y224 | UPF0568 protein C14orf166 OS=Homo sapiens GN=C14orf166 PE=1 SV=1 - [CN166_HUMAN]                                   | 6.57   | 6.15  | 2  | 2  | 2  |       | 0.108 |
| Q13336 | Urea transporter 1 OS=Homo sapiens GN=SLC14A1 PE=2 SV=2 - [UT1_HUMAN]                                              | 84.52  | 14.65 | 3  | 7  | 27 | 2.844 | 2.518 |
| P54725 | UV excision repair protein RAD23 homolog A OS=Homo sapiens GN=RAD23A PE=1 SV=1 - [RD23A_HUMAN]                     | 24.09  | 17.91 | 4  | 5  | 8  | 0.604 | 1.309 |
| P54727 | UV excision repair protein RAD23 homolog B OS=Homo sapiens GN=RAD23B PE=1 SV=1 - [RD23B_HUMAN]                     | 17.68  | 14.18 | 4  | 5  | 5  | 0.204 | 0.471 |
| P21281 | V-type proton ATPase subunit B, brain isoform OS=Homo sapiens GN=ATP6V1B2 PE=1 SV=3 - [VATB2_HUMAN]                | 34.09  | 13.50 | 6  | 6  | 10 | 0.196 | 0.410 |
| P61421 | V-type proton ATPase subunit d 1 OS=Homo sapiens GN=ATP6V0D1 PE=1 SV=1 - [VA0D1_HUMAN]                             | 19.96  | 9.69  | 4  | 4  | 6  | 0.397 | 0.295 |
| Q9Y5K8 | V-type proton ATPase subunit D OS=Homo sapiens GN=ATP6V1D PE=1 SV=1 - [VATD_HUMAN]                                 | 11.20  | 14.98 | 3  | 3  | 3  | 0.207 | 0.542 |
| O75348 | V-type proton ATPase subunit G 1 OS=Homo sapiens GN=ATP6V1G1 PE=1 SV=3 - [VATG1_HUMAN]                             | 22.83  | 28.81 | 4  | 4  | 6  | 0.172 | 0.452 |
| Q96RL7 | Vacuolar protein sorting-associated protein 13A OS=Homo sapiens GN=VPS13A PE=1 SV=2 - [VP13A_HUMAN]                | 27.50  | 2.52  | 7  | 7  | 8  | 0.748 | 1.110 |
| Q9UBQ0 | Vacuolar protein sorting-associated protein 29 OS=Homo sapiens GN=VPS29 PE=1 SV=1 - [VPS29_HUMAN]                  | 9.33   | 14.84 | 3  | 3  | 3  | 0.167 | 0.176 |
| Q96QK1 | Vacuolar protein sorting-associated protein 35 OS=Homo sapiens GN=VPS35 PE=1 SV=2 - [VPS35_HUMAN]                  | 23.06  | 7.54  | 6  | 6  | 7  | 0.089 | 0.170 |
| P50552 | Vasodilator-stimulated phosphoprotein OS=Homo sapiens GN=VASP PE=1 SV=3 - [VASP_HUMAN]                             | 34.74  | 11.58 | 6  | 6  | 9  | 1.637 | 0.776 |
| P49748 | Very long-chain specific acyl-CoA dehydrogenase, mitochondrial OS=Homo sapiens GN=ACADVL PE=1 SV=1 - [ACADV_HUMAN] | 46.38  | 12.98 | 9  | 9  | 13 | 0.129 | 0.096 |
| Q12981 | Vesicle transport protein SEC20 OS=Homo sapiens GN=BNIP1 PE=1 SV=3 - [SEC20_HUMAN]                                 | 6.85   | 8.33  | 2  | 2  | 2  | 0.955 | 1.141 |
| Q9NZ43 | Vesicle transport protein USE1 OS=Homo sapiens GN=USE1 PE=1 SV=2 - [USE1_HUMAN]                                    | 16.15  | 14.29 | 4  | 4  | 5  | 0.505 | 0.660 |
| Q15836 | Vesicle-associated membrane protein 3 OS=Homo sapiens GN=VAMP3 PE=1 SV=3 - [VAMP3_HUMAN]                           | 12.39  | 33.00 | 2  | 2  | 4  | 0.475 | 0.655 |
| P51809 | Vesicle-associated membrane protein 7 OS=Homo sapiens GN=VAMP7 PE=1 SV=3 - [VAMP7_HUMAN]                           | 20.20  | 16.82 | 4  | 4  | 7  | 0.234 | 0.269 |
| Q9P0L0 | Vesicle-associated membrane protein-associated protein A OS=Homo sapiens GN=VAPA PE=1 SV=3 - [VAPA_HUMAN]          | 63.24  | 36.14 | 8  | 9  | 20 | 0.758 | 0.673 |
| O95292 | Vesicle-associated membrane protein-associated protein B/C OS=Homo sapiens GN=VAPB PE=1 SV=3 - [VAPB_HUMAN]        | 35.06  | 27.16 | 4  | 6  | 11 | 0.706 | 0.723 |
| P46459 | Vesicle-fusing ATPase OS=Homo sapiens GN=NSF PE=1 SV=3 - [NSF_HUMAN]                                               | 116.38 | 28.90 | 23 | 23 | 34 | 0.411 | 0.783 |
| O75396 | Vesicle-trafficking protein SEC22b OS=Homo sapiens GN=SEC22B PE=1 SV=4 - [SC22B_HUMAN]                             | 59.03  | 38.60 | 7  | 7  | 17 | 0.547 | 0.553 |
| P21796 | Voltage-dependent anion-selective channel protein 1 OS=Homo sapiens GN=VDAC1 PE=1 SV=2 - [VDAC1_HUMAN]             | 142.54 | 38.16 | 9  | 11 | 43 | 0.025 | 0.066 |
| P45880 | Voltage-dependent anion-selective channel protein 2 OS=Homo sapiens GN=VDAC2 PE=1 SV=2 - [VDAC2_HUMAN]             | 134.91 | 42.18 | 11 | 12 | 40 | 0.014 | 0.066 |
| Q9Y277 | Voltage-dependent anion-selective channel protein 3 OS=Homo sapiens GN=VDAC3 PE=1 SV=1 - [VDAC3_HUMAN]             | 159.01 | 51.24 | 13 | 15 | 46 | 0.032 | 0.095 |
| A4D1P6 | WD repeat-containing protein 91 OS=Homo sapiens GN=WDR91 PE=1 SV=2 - [WDR91_HUMAN]                                 | 54.53  | 16.73 | 9  | 10 | 15 | 1.065 | 0.824 |
| P13010 | X-ray repair cross-complementing protein 5 OS=Homo sapiens GN=XRCC5 PE=1 SV=3 - [XRCC5_HUMAN]                      | 14.04  | 5.87  | 4  | 4  | 4  | 0.031 | 0.100 |
| Q7Z2W4 | Zinc finger CCCH-type antiviral protein 1 OS=Homo sapiens GN=ZC3HAV1 PE=1 SV=3 - [ZCCHV_HUMAN]                     | 20.45  | 9.20  | 6  | 6  | 6  | 0.667 | 0.279 |
| Q9Y6M5 | Zinc transporter 1 OS=Homo sapiens GN=SLC30A1 PE=1 SV=3 - [ZNT1_HUMAN]                                             | 18.99  | 8.88  | 4  | 4  | 6  | 1.355 | 0.761 |

**Supplemental Table 6B**

| Accession | Description                                                                                                   | Score  | Coverage | Unique Peptides | Peptides | PSMs | Cytosol fraction Adult RBC/retic | Cytosol fraction cord RBC/retic |
|-----------|---------------------------------------------------------------------------------------------------------------|--------|----------|-----------------|----------|------|----------------------------------|---------------------------------|
| Q9NRX4    | 14 kDa phosphohistidine phosphatase OS=Homo sapiens GN=PHPT1 PE=1 SV=1 - [PHP14_HUMAN]                        | 39.19  | 29.60    | 5               | 5        | 13   | 0.546                            | 0.438                           |
| P31946    | 14-3-3 protein beta/alpha OS=Homo sapiens GN=YWHAB PE=1 SV=3 - [1433B_HUMAN]                                  | 166.33 | 43.09    | 4               | 13       | 57   | 0.310                            | 0.251                           |
| P62258    | 14-3-3 protein epsilon OS=Homo sapiens GN=YWHAE PE=1 SV=1 - [1433E_HUMAN]                                     | 175.35 | 52.94    | 11              | 14       | 57   | 0.359                            | 0.288                           |
| Q04917    | 14-3-3 protein eta OS=Homo sapiens GN=YWHAH PE=1 SV=4 - [1433F_HUMAN]                                         | 117.70 | 41.46    | 6               | 11       | 40   | 0.078                            | 0.060                           |
| P61981    | 14-3-3 protein gamma OS=Homo sapiens GN=YWHAG PE=1 SV=2 - [1433G_HUMAN]                                       | 147.38 | 46.56    | 8               | 14       | 49   | 0.264                            | 0.180                           |
| P27348    | 14-3-3 protein theta OS=Homo sapiens GN=YWHAQ PE=1 SV=1 - [1433T_HUMAN]                                       | 171.10 | 54.29    | 8               | 17       | 56   | 0.173                            | 0.113                           |
| P63104    | 14-3-3 protein zeta/delta OS=Homo sapiens GN=YWHAZ PE=1 SV=1 - [1433Z_HUMAN]                                  | 164.93 | 38.78    | 5               | 12       | 54   | 0.261                            | 0.209                           |
| P62333    | 26S protease regulatory subunit 10B OS=Homo sapiens GN=PSMC6 PE=1 SV=1 - [PRS10_HUMAN]                        | 30.86  | 16.45    | 8               | 8        | 10   | 0.488                            | 0.213                           |
| P62191    | 26S protease regulatory subunit 4 OS=Homo sapiens GN=PSMC1 PE=1 SV=1 - [PRS4_HUMAN]                           | 37.65  | 20.91    | 10              | 11       | 12   | 0.489                            | 0.181                           |
| P17980    | 26S protease regulatory subunit 6A OS=Homo sapiens GN=PSMC3 PE=1 SV=3 - [PRS6A_HUMAN]                         | 29.77  | 18.91    | 7               | 7        | 9    | 0.489                            | 0.203                           |
| P43686    | 26S protease regulatory subunit 6B OS=Homo sapiens GN=PSMC4 PE=1 SV=2 - [PRS6B_HUMAN]                         | 35.98  | 11.24    | 6               | 7        | 12   | 0.337                            | 0.177                           |
| P35998    | 26S protease regulatory subunit 7 OS=Homo sapiens GN=PSMC2 PE=1 SV=3 - [PRS7_HUMAN]                           | 49.36  | 22.86    | 10              | 10       | 15   | 0.437                            | 0.193                           |
| Q99460    | 26S proteasome non-ATPase regulatory subunit 1 OS=Homo sapiens GN=PSMD1 PE=1 SV=2 - [PSMD1_HUMAN]             | 36.24  | 8.60     | 9               | 9        | 12   | 0.366                            | 0.188                           |
| O00231    | 26S proteasome non-ATPase regulatory subunit 11 OS=Homo sapiens GN=PSMD11 PE=1 SV=3 - [PSD11_HUMAN]           | 27.89  | 14.69    | 7               | 7        | 10   | 0.329                            | 0.143                           |
| O00232    | 26S proteasome non-ATPase regulatory subunit 12 OS=Homo sapiens GN=PSMD12 PE=1 SV=3 - [PSD12_HUMAN]           | 38.87  | 17.98    | 9               | 9        | 13   | 0.311                            | 0.175                           |
| Q9UNM6    | 26S proteasome non-ATPase regulatory subunit 13 OS=Homo sapiens GN=PSMD13 PE=1 SV=2 - [PSD13_HUMAN]           | 34.43  | 15.16    | 7               | 7        | 11   | 0.294                            | 0.143                           |
| O00487    | 26S proteasome non-ATPase regulatory subunit 14 OS=Homo sapiens GN=PSMD14 PE=1 SV=1 - [PSDE_HUMAN]            | 13.13  | 9.03     | 4               | 4        | 5    | 0.374                            | 0.143                           |
| P55036    | 26S proteasome non-ATPase regulatory subunit 4 OS=Homo sapiens GN=PSMD4 PE=1 SV=1 - [PSMD4_HUMAN]             | 15.18  | 10.34    | 4               | 4        | 5    | 0.290                            | 0.244                           |
| O00233    | 26S proteasome non-ATPase regulatory subunit 9 OS=Homo sapiens GN=PSMD9 PE=1 SV=3 - [PSMD9_HUMAN]             | 43.88  | 27.80    | 7               | 7        | 13   | 0.663                            | 0.498                           |
| Q13442    | 28 kDa heat- and acid-stable phosphoprotein OS=Homo sapiens GN=PDAP1 PE=1 SV=1 - [HAP28_HUMAN]                | 36.22  | 29.28    | 7               | 7        | 12   | 0.063                            | 0.117                           |
| P25325    | 3-mercaptopyruvate sulfurtransferase OS=Homo sapiens GN=MPST PE=1 SV=3 - [THTM_HUMAN]                         | 25.72  | 20.88    | 6               | 7        | 9    | 0.759                            | 0.536                           |
| P49189    | 4-trimethylaminobutyaldehyde dehydrogenase OS=Homo sapiens GN=ALDH9A1 PE=1 SV=3 - [AL9A1_HUMAN]               | 31.43  | 15.99    | 8               | 8        | 10   | 0.448                            | 0.317                           |
| P46783    | 40S ribosomal protein S10 OS=Homo sapiens GN=RPS10 PE=1 SV=1 - [RS10_HUMAN]                                   | 20.64  | 26.67    | 6               | 6        | 8    | 0.173                            | 0.102                           |
| P62280    | 40S ribosomal protein S11 OS=Homo sapiens GN=RPS11 PE=1 SV=3 - [RS11_HUMAN]                                   | 6.08   | 11.39    | 2               | 2        | 2    | 0.047                            | 0.057                           |
| P25398    | 40S ribosomal protein S12 OS=Homo sapiens GN=RPS12 PE=1 SV=3 - [RS12_HUMAN]                                   | 7.10   | 14.39    | 2               | 2        | 2    | 0.088                            | 0.074                           |
| P62249    | 40S ribosomal protein S16 OS=Homo sapiens GN=RPS16 PE=1 SV=2 - [RS16_HUMAN]                                   | 21.33  | 16.44    | 4               | 4        | 8    | 0.054                            | 0.097                           |
| POCW22    | 40S ribosomal protein S17-like OS=Homo sapiens GN=RPS17L PE=3 SV=1 - [RS17L_HUMAN]                            | 12.33  | 9.63     | 2               | 3        | 5    | 0.282                            | 0.150                           |
| P62269    | 40S ribosomal protein S18 OS=Homo sapiens GN=RPS18 PE=1 SV=3 - [RS18_HUMAN]                                   | 21.76  | 27.63    | 6               | 6        | 7    | 0.099                            | 0.103                           |
| P39019    | 40S ribosomal protein S19 OS=Homo sapiens GN=RPS19 PE=1 SV=2 - [RS19_HUMAN]                                   | 19.31  | 26.90    | 4               | 4        | 6    | 0.112                            | 0.094                           |
| P60866    | 40S ribosomal protein S20 OS=Homo sapiens GN=RPS20 PE=1 SV=1 - [RS20_HUMAN]                                   | 5.80   | 17.65    | 2               | 2        | 2    | 0.038                            | 0.055                           |
| Q8WVC2    | 40S ribosomal protein S21 OS=Homo sapiens GN=RPS21 PE=2 SV=1 - [Q8WVC2_HUMAN]                                 | 14.67  | 32.10    | 3               | 3        | 5    | 0.128                            | 0.063                           |
| P62857    | 40S ribosomal protein S28 OS=Homo sapiens GN=RPS28 PE=1 SV=1 - [RS28_HUMAN]                                   | 6.93   | 28.99    | 2               | 2        | 2    | 0.013                            | 0.032                           |
| P23396    | 40S ribosomal protein S3 OS=Homo sapiens GN=RPS3 PE=1 SV=2 - [RS3_HUMAN]                                      | 20.80  | 22.63    | 5               | 5        | 6    | 0.046                            | 0.050                           |
| P62701    | 40S ribosomal protein S4, X isoform OS=Homo sapiens GN=RPS4X PE=1 SV=2 - [RS4X_HUMAN]                         | 21.17  | 10.65    | 3               | 3        | 7    | 0.067                            | 0.078                           |
| P46782    | 40S ribosomal protein S5 OS=Homo sapiens GN=RPS5 PE=1 SV=4 - [RS5_HUMAN]                                      | 5.92   | 8.82     | 2               | 2        | 2    | 0.074                            | 0.080                           |
| P62753    | 40S ribosomal protein S6 OS=Homo sapiens GN=RPS6 PE=1 SV=1 - [RS6_HUMAN]                                      | 17.76  | 17.27    | 5               | 5        | 6    | 0.178                            | 0.051                           |
| P62081    | 40S ribosomal protein S7 OS=Homo sapiens GN=RPS7 PE=1 SV=1 - [RS7_HUMAN]                                      | 18.46  | 17.53    | 4               | 4        | 6    | 0.076                            | 0.045                           |
| P46781    | 40S ribosomal protein S9 OS=Homo sapiens GN=RPS9 PE=1 SV=3 - [RS9_HUMAN]                                      | 8.13   | 10.82    | 2               | 2        | 3    | 0.274                            | 0.090                           |
| Q13131    | 5'-AMP-activated protein kinase catalytic subunit alpha-1 OS=Homo sapiens GN=PRKAA1 PE=1 SV=4 - [AAPK1_HUMAN] | 8.97   | 5.01     | 3               | 3        | 3    | 0.153                            | 0.153                           |
| Q5JUV3    | 5'-nucleotidase, cytosolic II (Fragment) OS=Homo sapiens GN=NT5C2 PE=2 SV=1 - [Q5JUV3_HUMAN]                  | 5.09   | 8.05     | 2               | 2        | 2    | 0.145                            | 0.125                           |
| Q01813    | 6-phosphofructokinase type C OS=Homo sapiens GN=PFKP PE=1 SV=2 - [K6PP_HUMAN]                                 | 18.59  | 7.78     | 3               | 6        | 7    | 0.169                            | 0.211                           |
| P17858    | 6-phosphofructokinase, liver type OS=Homo sapiens GN=PFKL PE=1 SV=6 - [K6PL_HUMAN]                            | 26.65  | 11.03    | 5               | 8        | 9    | 0.339                            | 0.387                           |
| P08237    | 6-phosphofructokinase, muscle type OS=Homo sapiens GN=PFKM PE=1 SV=2 - [K6PF_HUMAN]                           | 36.80  | 8.59     | 6               | 7        | 12   | 0.383                            | 0.319                           |
| F5H7U0    | 6-phosphogluconate dehydrogenase, decarboxylating OS=Homo sapiens GN=PGD PE=3 SV=1 - [F5H7U0_HUMAN]           | 136.83 | 33.41    | 16              | 16       | 45   | 0.226                            | 0.195                           |
| O95336    | 6-phosphogluconolactonase OS=Homo sapiens GN=PGLS PE=1 SV=2 - [6PGL_HUMAN]                                    | 27.75  | 24.81    | 6               | 6        | 8    | 0.584                            | 0.415                           |
| P05388    | 60S acidic ribosomal protein P0 OS=Homo sapiens GN=RPLP0 PE=1 SV=1 - [RLA0_HUMAN]                             | 9.25   | 5.36     | 2               | 2        | 3    | 0.105                            | 0.072                           |
| P62906    | 60S ribosomal protein L10a OS=Homo sapiens GN=RPL10A PE=1 SV=2 - [RL10A_HUMAN]                                | 8.29   | 14.75    | 3               | 3        | 3    | 0.111                            | 0.070                           |
| P30050    | 60S ribosomal protein L12 OS=Homo sapiens GN=RPL12 PE=1 SV=1 - [RL12_HUMAN]                                   | 8.35   | 13.94    | 3               | 3        | 3    | 0.109                            | 0.069                           |
| P26373    | 60S ribosomal protein L13 OS=Homo sapiens GN=RPL13 PE=1 SV=4 - [RL13_HUMAN]                                   | 27.85  | 17.54    | 4               | 4        | 8    | 0.044                            | 0.031                           |
| P40429    | 60S ribosomal protein L13a OS=Homo sapiens GN=RPL13A PE=1 SV=2 - [RL13A_HUMAN]                                | 4.96   | 6.40     | 2               | 2        | 2    | 0.064                            | 0.056                           |
| P18621    | 60S ribosomal protein L17 OS=Homo sapiens GN=RPL17 PE=1 SV=3 - [RL17_HUMAN]                                   | 16.26  | 21.74    | 4               | 4        | 5    | 0.034                            | 0.037                           |
| P46778    | 60S ribosomal protein L21 OS=Homo sapiens GN=RPL21 PE=1 SV=2 - [RL21_HUMAN]                                   | 4.88   | 8.13     | 2               | 2        | 2    | 0.146                            | 0.110                           |
| P35268    | 60S ribosomal protein L22 OS=Homo sapiens GN=RPL22 PE=1 SV=2 - [RL22_HUMAN]                                   | 7.52   | 17.97    | 3               | 3        | 3    | 0.252                            | 0.075                           |
| P62750    | 60S ribosomal protein L23a OS=Homo sapiens GN=RPL23A PE=1 SV=1 - [RL23A_HUMAN]                                | 5.48   | 5.13     | 2               | 2        | 2    | 0.092                            | 0.071                           |
| P46779    | 60S ribosomal protein L28 OS=Homo sapiens GN=RPL28 PE=1 SV=3 - [RL28_HUMAN]                                   | 21.44  | 25.55    | 5               | 5        | 7    | 0.160                            | 0.075                           |

|        |                                                                                                                      |        |       |    |    |     |       |       |
|--------|----------------------------------------------------------------------------------------------------------------------|--------|-------|----|----|-----|-------|-------|
| P62888 | 60S ribosomal protein L30 OS=Homo sapiens GN=RPL30 PE=1 SV=2 - [RL30_HUMAN]                                          | 13.00  | 14.78 | 2  | 2  | 5   | 0.218 | 0.056 |
| P49207 | 60S ribosomal protein L34 OS=Homo sapiens GN=RPL34 PE=1 SV=3 - [RL34_HUMAN]                                          | 9.02   | 13.68 | 2  | 2  | 3   | 0.034 | 0.037 |
| P42766 | 60S ribosomal protein L35 OS=Homo sapiens GN=RPL35 PE=1 SV=2 - [RL35_HUMAN]                                          | 10.92  | 18.70 | 3  | 4  | 4   | 0.136 | 0.082 |
| P18077 | 60S ribosomal protein L35a OS=Homo sapiens GN=RPL35A PE=1 SV=2 - [RL35A_HUMAN]                                       | 8.16   | 23.64 | 3  | 3  | 3   | 0.223 | 0.110 |
| Q02878 | 60S ribosomal protein L6 OS=Homo sapiens GN=RPL6 PE=1 SV=3 - [RL6_HUMAN]                                             | 11.13  | 13.19 | 4  | 4  | 4   | 0.201 | 0.069 |
| P18124 | 60S ribosomal protein L7 OS=Homo sapiens GN=RPL7 PE=1 SV=1 - [RL7_HUMAN]                                             | 12.85  | 20.16 | 4  | 4  | 4   | 0.211 | 0.112 |
| P11021 | 78 kDa glucose-regulated protein OS=Homo sapiens GN=HSPA5 PE=1 SV=2 - [GRP78_HUMAN]                                  | 73.98  | 9.94  | 3  | 6  | 23  | 0.174 | 0.097 |
| Q2L6I2 | ABC50 protein OS=Homo sapiens GN=ABCF1 PE=2 SV=1 - [Q2L6I2_HUMAN]                                                    | 15.17  | 4.21  | 4  | 4  | 5   | 0.047 | 0.149 |
| Q9BWD1 | Acetyl-CoA acetyltransferase, cytosolic OS=Homo sapiens GN=ACAT2 PE=1 SV=2 - [THIC_HUMAN]                            | 24.71  | 12.59 | 7  | 7  | 9   | 0.283 | 0.353 |
| Q92688 | Acidic leucine-rich nuclear phosphoprotein 32 family member B OS=Homo sapiens GN=ANP32B PE=1 SV=1 - [AN32B_HUMAN]    | 36.09  | 15.94 | 3  | 5  | 11  | 0.062 | 0.051 |
| P61160 | Actin-related protein 2 OS=Homo sapiens GN=ACTR2 PE=1 SV=1 - [ARP2_HUMAN]                                            | 34.71  | 6.60  | 2  | 3  | 14  | 0.185 | 0.309 |
| O15144 | Actin-related protein 2/3 complex subunit 2 OS=Homo sapiens GN=ARPC2 PE=1 SV=1 - [ARPC2_HUMAN]                       | 10.90  | 11.67 | 4  | 4  | 4   | 0.126 | 0.228 |
| P53999 | Activated RNA polymerase II transcriptional coactivator p15 OS=Homo sapiens GN=SUB1 PE=1 SV=3 - [TCP4_HUMAN]         | 6.36   | 15.75 | 2  | 2  | 2   | 0.545 | 0.032 |
| O95433 | Activator of 90 kDa heat shock protein ATPase homolog 1 OS=Homo sapiens GN=AHSA1 PE=1 SV=1 - [AHSA1_HUMAN]           | 13.72  | 10.65 | 4  | 4  | 5   | 0.185 | 0.152 |
| P07108 | Acyl-CoA-binding protein OS=Homo sapiens GN=DBI PE=1 SV=2 - [ACBP_HUMAN]                                             | 10.03  | 41.38 | 2  | 2  | 3   | 0.122 | 0.197 |
| P13798 | Acylamino-acid-releasing enzyme OS=Homo sapiens GN=APEH PE=1 SV=4 - [ACPH_HUMAN]                                     | 162.91 | 28.01 | 21 | 21 | 49  | 0.510 | 0.376 |
| P07311 | Acylphosphatase-1 OS=Homo sapiens GN=ACYP1 PE=1 SV=2 - [ACYP1_HUMAN]                                                 | 18.59  | 28.28 | 4  | 4  | 6   | 0.435 | 0.410 |
| Q7Z451 | Adaptor-related protein complex 2, beta 1 subunit, isoform CRA_f OS=Homo sapiens GN=AP2B1 PE=2 SV=1 - [Q7Z451_HUMAN] | 21.68  | 5.00  | 6  | 6  | 7   | 0.341 | 0.181 |
| Q96D30 | ADD1 protein OS=Homo sapiens GN=ADD1 PE=2 SV=1 - [Q96D30_HUMAN]                                                      | 5.47   | 4.25  | 2  | 2  | 2   | 0.148 | 0.349 |
| P07741 | Adenine phosphoribosyltransferase OS=Homo sapiens GN=APRT PE=1 SV=2 - [APT_HUMAN]                                    | 35.69  | 32.78 | 7  | 7  | 13  | 0.294 | 0.262 |
| F5H737 | Adenosylhomocysteinase OS=Homo sapiens GN=AHCY PE=3 SV=1 - [F5H737_HUMAN]                                            | 46.43  | 24.26 | 10 | 10 | 15  | 0.487 | 0.493 |
| P00568 | Adenylate kinase isoenzyme 1 OS=Homo sapiens GN=AK1 PE=1 SV=3 - [KAD1_HUMAN]                                         | 136.77 | 45.36 | 11 | 12 | 43  | 0.780 | 0.428 |
| P30566 | Adenylosuccinate lyase OS=Homo sapiens GN=ADSL PE=1 SV=2 - [PUR8_HUMAN]                                              | 60.33  | 18.39 | 11 | 11 | 19  | 0.685 | 0.470 |
| F5H6Z3 | Adenylyl cyclase-associated protein OS=Homo sapiens GN=CAP1 PE=3 SV=1 - [F5H6Z3_HUMAN]                               | 30.77  | 11.28 | 6  | 6  | 11  | 0.237 | 0.186 |
| Q9UUK9 | ADP-sugar pyrophosphatase OS=Homo sapiens GN=NUDT5 PE=1 SV=1 - [NUDT5_HUMAN]                                         | 13.15  | 16.89 | 4  | 4  | 4   | 0.408 | 0.327 |
| P49588 | Alanyl-tRNA synthetase, cytoplasmic OS=Homo sapiens GN=AARS PE=1 SV=2 - [SYAC_HUMAN]                                 | 141.47 | 20.56 | 23 | 23 | 46  | 0.038 | 0.047 |
| C9JKR2 | Albumin, isoform CRA_k OS=Homo sapiens GN=ALB PE=4 SV=1 - [C9JKR2_HUMAN]                                             | 8.57   | 7.67  | 2  | 2  | 2   | 0.662 | 0.895 |
| P14550 | Alcohol dehydrogenase [NADP+] OS=Homo sapiens GN=AKR1A1 PE=1 SV=3 - [AK1A1_HUMAN]                                    | 20.01  | 10.15 | 4  | 4  | 7   | 0.432 | 0.421 |
| P11766 | Alcohol dehydrogenase class-3 OS=Homo sapiens GN=ADH5 PE=1 SV=4 - [ADHX_HUMAN]                                       | 25.06  | 13.10 | 6  | 6  | 9   | 0.210 | 0.172 |
| P42330 | Aldo-keto reductase family 1 member C3 OS=Homo sapiens GN=AKR1C3 PE=1 SV=4 - [AK1C3_HUMAN]                           | 14.00  | 9.91  | 4  | 4  | 5   | 0.147 | 0.169 |
| P15121 | Aldose reductase OS=Homo sapiens GN=AKR1B1 PE=1 SV=3 - [ALDR_HUMAN]                                                  | 22.46  | 7.91  | 3  | 3  | 7   | 0.221 | 0.210 |
| O43768 | Alpha-endosulfine OS=Homo sapiens GN=ENSA PE=1 SV=1 - [ENSA_HUMAN]                                                   | 23.94  | 52.89 | 6  | 6  | 9   | 0.120 | 0.180 |
| P06733 | Alpha-enolase OS=Homo sapiens GN=ENO1 PE=1 SV=2 - [ENOA_HUMAN]                                                       | 292.07 | 35.48 | 15 | 17 | 98  | 0.080 | 0.171 |
| Q9N2D4 | Alpha-hemoglobin-stabilizing protein OS=Homo sapiens GN=AHSP PE=1 SV=1 - [AHSP_HUMAN]                                | 326.31 | 56.86 | 7  | 7  | 103 | 0.051 | 0.094 |
| P54920 | Alpha-soluble NSF attachment protein OS=Homo sapiens GN=NAPA PE=1 SV=3 - [SNA_A_HUMAN]                               | 54.79  | 32.88 | 9  | 9  | 17  | 0.775 | 0.458 |
| Q6FI81 | Anamorsin OS=Homo sapiens GN=CIAPIN1 PE=1 SV=2 - [CPIN1_HUMAN]                                                       | 6.39   | 7.05  | 2  | 2  | 2   | 0.252 | 0.192 |
| P08758 | Annexin A5 OS=Homo sapiens GN=ANXA5 PE=1 SV=2 - [ANXA5_HUMAN]                                                        | 12.84  | 7.81  | 3  | 3  | 5   | 0.236 | 0.249 |
| O95782 | AP-2 complex subunit alpha-1 OS=Homo sapiens GN=AP2A1 PE=1 SV=3 - [AP2A1_HUMAN]                                      | 36.69  | 7.16  | 9  | 9  | 12  | 0.314 | 0.177 |
| P05089 | Arginase-1 OS=Homo sapiens GN=ARG1 PE=1 SV=2 - [ARGI1_HUMAN]                                                         | 14.85  | 8.07  | 2  | 3  | 5   | 0.168 | 0.558 |
| O43776 | Asparaginyl-tRNA synthetase, cytoplasmic OS=Homo sapiens GN=NARS PE=1 SV=1 - [SYNC_HUMAN]                            | 26.51  | 9.67  | 5  | 6  | 9   | 0.109 | 0.092 |
| P17174 | Aspartate aminotransferase, cytoplasmic OS=Homo sapiens GN=GOT1 PE=1 SV=3 - [AATC_HUMAN]                             | 54.91  | 17.68 | 7  | 7  | 16  | 0.362 | 0.261 |
| P14868 | Aspartyl-tRNA synthetase, cytoplasmic OS=Homo sapiens GN=DARS PE=1 SV=2 - [SYDC_HUMAN]                               | 41.93  | 20.96 | 11 | 11 | 14  | 0.227 | 0.258 |
| P53396 | ATP-citrate synthase OS=Homo sapiens GN=ACLY PE=1 SV=3 - [ACLY_HUMAN]                                                | 197.11 | 24.25 | 31 | 31 | 60  | 0.272 | 0.300 |
| Q08211 | ATP-dependent RNA helicase A OS=Homo sapiens GN=DHX9 PE=1 SV=4 - [DHX9_HUMAN]                                        | 25.35  | 5.98  | 7  | 7  | 9   | 0.128 | 0.118 |
| P02730 | Band 3 anion transport protein OS=Homo sapiens GN=SLC4A1 PE=1 SV=3 - [B3AT_HUMAN]                                    | 45.64  | 8.01  | 7  | 7  | 15  | 0.050 | 0.480 |
| O43491 | Band 4.1-like protein 2 OS=Homo sapiens GN=EPB41L2 PE=1 SV=1 - [E41L2_HUMAN]                                         | 8.05   | 4.48  | 2  | 3  | 3   | 0.228 | 0.499 |
| P07814 | Bifunctional aminoacyl-tRNA synthetase OS=Homo sapiens GN=EPRS PE=1 SV=5 - [SYEP_HUMAN]                              | 25.15  | 3.24  | 4  | 4  | 7   | 0.060 | 0.053 |
| Q3LXA3 | Bifunctional ATP-dependent dihydroxyacetone kinase/FAD-AMP lyase OS=Homo sapiens GN=DAK PE=1 SV=2 - [DHAK_HUMAN]     | 22.15  | 6.78  | 4  | 4  | 7   | 0.890 | 0.420 |
| P53004 | Biliverdin reductase A OS=Homo sapiens GN=BLVRA PE=1 SV=2 - [BIEA_HUMAN]                                             | 65.46  | 32.43 | 12 | 12 | 21  | 0.408 | 0.250 |
| P07738 | Bisphosphoglycerate mutase OS=Homo sapiens GN=BPGM PE=1 SV=2 - [PMGE_HUMAN]                                          | 334.23 | 49.42 | 14 | 14 | 102 | 0.673 | 0.755 |
| Q13867 | Bleomycin hydrolase OS=Homo sapiens GN=BLMH PE=1 SV=1 - [BLMH_HUMAN]                                                 | 13.51  | 10.77 | 4  | 4  | 4   | 0.455 | 0.389 |
| Q9H3K6 | Bola-like protein 2 OS=Homo sapiens GN=BOLA2 PE=1 SV=1 - [BOLA2_HUMAN]                                               | 17.06  | 26.74 | 2  | 2  | 5   | 0.517 | 0.414 |
| Q9NWW8 | BRISC and BRCA1-A complex member 1 OS=Homo sapiens GN=BABAM1 PE=1 SV=1 - [BABA1_HUMAN]                               | 11.88  | 6.08  | 2  | 2  | 4   | 0.182 | 0.136 |
| Q5VW32 | BRO1 domain-containing protein BROX OS=Homo sapiens GN=BROX PE=1 SV=1 - [BROX_HUMAN]                                 | 35.09  | 13.63 | 8  | 8  | 12  | 0.481 | 0.337 |
| P11586 | C-1-tetrahydrofolate synthase, cytoplasmic OS=Homo sapiens GN=MTHFD1 PE=1 SV=3 - [C1TC_HUMAN]                        | 122.17 | 23.21 | 26 | 26 | 40  | 0.118 | 0.096 |
| P27708 | CAD protein OS=Homo sapiens GN=CAD PE=1 SV=3 - [PYR1_HUMAN]                                                          | 6.22   | 0.90  | 2  | 2  | 2   | 0.154 | 0.108 |

|        |                                                                                                                                       |        |       |    |    |     |        |       |
|--------|---------------------------------------------------------------------------------------------------------------------------------------|--------|-------|----|----|-----|--------|-------|
| Q9BRF8 | Calcineurin-like phosphoesterase domain-containing protein 1 OS=Homo sapiens GN=CPPED1 PE=1 SV=3 - [CPPED_HUMAN]                      | 6.38   | 5.41  | 2  | 2  | 2   | 0.203  | 0.212 |
| Q9Y2V2 | Calcium-regulated heat stable protein 1 OS=Homo sapiens GN=CARHSP1 PE=1 SV=2 - [CHSP1_HUMAN]                                          | 19.72  | 12.93 | 2  | 2  | 6   | 0.443  | 0.301 |
| P62158 | Calmodulin OS=Homo sapiens GN=CALM1 PE=1 SV=2 - [CALM_HUMAN]                                                                          | 153.79 | 23.49 | 6  | 6  | 46  | 0.253  | 0.162 |
| P04632 | Calpain small subunit 1 OS=Homo sapiens GN=CAPNS1 PE=1 SV=1 - [CPNS1_HUMAN]                                                           | 23.52  | 21.27 | 6  | 6  | 9   | 0.527  | 0.298 |
| P07384 | Calpain-1 catalytic subunit OS=Homo sapiens GN=CAPN1 PE=1 SV=1 - [CAN1_HUMAN]                                                         | 77.80  | 18.91 | 14 | 14 | 25  | 0.591  | 0.359 |
| P27797 | Calreticulin OS=Homo sapiens GN=CALR PE=1 SV=1 - [CALR_HUMAN]                                                                         | 19.77  | 18.47 | 6  | 6  | 7   | 0.037  | 0.046 |
| P17612 | cAMP-dependent protein kinase catalytic subunit alpha OS=Homo sapiens GN=PRKACA PE=1 SV=2 - [KAPCA_HUMAN]                             | 12.88  | 7.69  | 4  | 4  | 4   | 0.212  | 0.114 |
| B1AK87 | Capping protein (Actin filament) muscle Z-line, beta OS=Homo sapiens GN=CAPZB PE=4 SV=1 - [B1AK87_HUMAN]                              | 25.57  | 21.92 | 6  | 6  | 8   | 0.307  | 0.252 |
| P00915 | Carbonic anhydrase 1 OS=Homo sapiens GN=CA1 PE=1 SV=2 - [CAH1_HUMAN]                                                                  | 421.71 | 55.56 | 11 | 11 | 130 | 13.615 | 1.656 |
| P00918 | Carbonic anhydrase 2 OS=Homo sapiens GN=CA2 PE=1 SV=2 - [CAH2_HUMAN]                                                                  | 220.55 | 47.69 | 11 | 11 | 70  | 2.712  | 0.830 |
| P16152 | Carbonyl reductase [NADPH] 1 OS=Homo sapiens GN=CBR1 PE=1 SV=3 - [CBR1_HUMAN]                                                         | 8.38   | 5.78  | 2  | 2  | 3   | 0.696  | 0.319 |
| Q96DG6 | Carboxymethylenebutenolidase homolog OS=Homo sapiens GN=CMBL PE=1 SV=1 - [CMBL_HUMAN]                                                 | 26.33  | 21.63 | 7  | 7  | 9   | 0.572  | 0.225 |
| P04040 | Catalase OS=Homo sapiens GN=CAT PE=1 SV=3 - [CATA_HUMAN]                                                                              | 549.08 | 53.70 | 30 | 30 | 180 | 0.792  | 0.623 |
| Q9Y5K6 | CD2-associated protein OS=Homo sapiens GN=CD2AP PE=1 SV=1 - [CD2AP_HUMAN]                                                             | 13.81  | 5.48  | 4  | 4  | 5   | 0.235  | 0.264 |
| B7Z3E2 | cDNA FLJ50777, highly similar to Serine/threonine-protein phosphatase 6 (EC 3.1.3.16) OS=Homo sapiens PE=2 SV=1 - [B7Z3E2_HUMAN]      | 4.81   | 8.86  | 2  | 2  | 2   | 0.569  | 0.252 |
| B4DEW9 | cDNA FLJ52478, highly similar to Eukaryotic translation initiation factor 3 subunit 5 OS=Homo sapiens PE=2 SV=1 - [B4DEW9_HUMAN]      | 16.03  | 11.54 | 3  | 3  | 6   | 0.084  | 0.057 |
| B4DHX4 | cDNA FLJ52902, highly similar to Rab GDP dissociation inhibitor alpha OS=Homo sapiens PE=2 SV=1 - [B4DHX4_HUMAN]                      | 24.55  | 13.91 | 2  | 6  | 8   | 0.368  | 0.330 |
| B4DS57 | cDNA FLJ53176, highly similar to Nuclear autoantigenic sperm protein OS=Homo sapiens PE=2 SV=1 - [B4DS57_HUMAN]                       | 27.86  | 8.87  | 5  | 6  | 9   | 0.043  | 0.042 |
| B4DFF1 | cDNA FLJ53312, highly similar to Heterogeneous nuclear ribonucleoprotein K OS=Homo sapiens PE=2 SV=1 - [B4DFF1_HUMAN]                 | 80.66  | 18.74 | 10 | 10 | 25  | 0.093  | 0.112 |
| B4E022 | cDNA FLJ56274, highly similar to Transketolase (EC 2.2.1.1) OS=Homo sapiens PE=2 SV=1 - [B4E022_HUMAN]                                | 108.97 | 28.65 | 16 | 16 | 34  | 0.151  | 0.107 |
| B4DZV5 | cDNA FLJ58820, highly similar to 55 kDa erythrocyte membrane protein (p55) OS=Homo sapiens PE=2 SV=1 - [B4DZV5_HUMAN]                 | 5.39   | 3.44  | 2  | 2  | 2   | 0.177  | 0.329 |
| A8K1B6 | cDNA FLJ78533, highly similar to Homo sapiens dynamin 2 (DNM2), transcript variant 4, mRNA OS=Homo sapiens PE=2 SV=1 - [A8K1B6_HUMAN] | 17.30  | 5.43  | 5  | 5  | 6   | 0.329  | 0.280 |
| P60953 | Cell division control protein 42 homolog OS=Homo sapiens GN=CDC42 PE=1 SV=2 - [CDC42_HUMAN]                                           | 27.52  | 20.94 | 3  | 4  | 8   | 0.544  | 0.325 |
| B7Z4T9 | Chaperonin containing TCP1, subunit 7 (Eta), isoform CRA_c OS=Homo sapiens GN=CCT7 PE=2 SV=1 - [B7Z4T9_HUMAN]                         | 102.85 | 25.05 | 14 | 14 | 33  | 0.205  | 0.168 |
| O43633 | Charged multivesicular body protein 2a OS=Homo sapiens GN=CHMP2A PE=1 SV=1 - [CHM2A_HUMAN]                                            | 14.42  | 14.41 | 4  | 4  | 5   | 0.300  | 0.449 |
| Q9H444 | Charged multivesicular body protein 4b OS=Homo sapiens GN=CHMP4B PE=1 SV=1 - [CHM4B_HUMAN]                                            | 13.57  | 15.63 | 4  | 4  | 4   | 0.168  | 0.183 |
| O00299 | Chloride intracellular channel protein 1 OS=Homo sapiens GN=CLIC1 PE=1 SV=4 - [CLIC1_HUMAN]                                           | 35.11  | 22.82 | 7  | 7  | 12  | 0.306  | 0.212 |
| Q13185 | Chromobox protein homolog 3 OS=Homo sapiens GN=CBX3 PE=1 SV=4 - [CBX3_HUMAN]                                                          | 13.93  | 24.04 | 4  | 4  | 4   | 0.195  | 0.129 |
| Q00610 | Clathrin heavy chain 1 OS=Homo sapiens GN=CLTC PE=1 SV=5 - [CLH1_HUMAN]                                                               | 120.88 | 13.13 | 22 | 22 | 39  | 0.209  | 0.107 |
| P09497 | Clathrin light chain B OS=Homo sapiens GN=CLTB PE=1 SV=1 - [CLCB_HUMAN]                                                               | 9.85   | 12.23 | 3  | 3  | 3   | 0.154  | 0.081 |
| P48444 | Coatomer subunit delta OS=Homo sapiens GN=ARCN1 PE=1 SV=1 - [COPD_HUMAN]                                                              | 8.32   | 4.11  | 2  | 2  | 3   | 0.140  | 0.197 |
| Q15021 | Condensin complex subunit 1 OS=Homo sapiens GN=NCAPD2 PE=1 SV=3 - [CND1_HUMAN]                                                        | 5.39   | 1.14  | 2  | 2  | 2   | 0.167  | 0.095 |
| Q13098 | COP9 signalosome complex subunit 1 OS=Homo sapiens GN=GPS1 PE=1 SV=4 - [CSN1_HUMAN]                                                   | 15.51  | 8.35  | 5  | 5  | 6   | 0.649  | 0.356 |
| Q9BT78 | COP9 signalosome complex subunit 4 OS=Homo sapiens GN=COPS4 PE=1 SV=1 - [CSN4_HUMAN]                                                  | 24.26  | 14.78 | 6  | 6  | 7   | 0.626  | 0.326 |
| Q92905 | COP9 signalosome complex subunit 5 OS=Homo sapiens GN=COPS5 PE=1 SV=4 - [CSN5_HUMAN]                                                  | 16.14  | 6.89  | 3  | 3  | 5   | 0.531  | 0.355 |
| Q9H9Q2 | COP9 signalosome complex subunit 7b OS=Homo sapiens GN=COPS7B PE=1 SV=1 - [CSN7B_HUMAN]                                               | 5.52   | 8.71  | 2  | 2  | 2   | 0.504  | 0.321 |
| Q5JX54 | Copine I (Fragment) OS=Homo sapiens GN=CPNE1 PE=2 SV=1 - [Q5JX54_HUMAN]                                                               | 6.27   | 13.24 | 2  | 2  | 2   | 0.361  | 0.169 |
| O14618 | Copper chaperone for superoxide dismutase OS=Homo sapiens GN=CCS PE=1 SV=1 - [CCS_HUMAN]                                              | 44.72  | 22.99 | 8  | 8  | 15  | 0.420  | 0.207 |
| P36551 | Coproporphyrinogen-III oxidase, mitochondrial OS=Homo sapiens GN=CPOX PE=1 SV=3 - [HEM6_HUMAN]                                        | 19.59  | 15.64 | 6  | 6  | 6   | 0.276  | 0.100 |
| Q9ULV4 | Coronin-1C OS=Homo sapiens GN=CORO1C PE=1 SV=1 - [COR1C_HUMAN]                                                                        | 37.25  | 11.81 | 9  | 9  | 12  | 0.071  | 0.034 |
| P57737 | Coronin-7 OS=Homo sapiens GN=CORO7 PE=1 SV=2 - [CORO7_HUMAN]                                                                          | 5.03   | 1.84  | 2  | 2  | 2   | 0.249  | 0.103 |
| Q96H99 | Cortactin OS=Homo sapiens GN=CTTN PE=2 SV=1 - [Q96H99_HUMAN]                                                                          | 11.36  | 8.38  | 4  | 4  | 4   | 0.223  | 0.163 |
| P17812 | CTP synthase 1 OS=Homo sapiens GN=CTPS PE=1 SV=2 - [PYRG1_HUMAN]                                                                      | 21.01  | 7.28  | 2  | 5  | 7   | 0.340  | 0.286 |
| Q13617 | Cullin-2 OS=Homo sapiens GN=CUL2 PE=1 SV=2 - [CUL2_HUMAN]                                                                             | 17.26  | 4.56  | 4  | 4  | 6   | 0.733  | 0.402 |
| Q13618 | Cullin-3 OS=Homo sapiens GN=CUL3 PE=1 SV=2 - [CUL3_HUMAN]                                                                             | 18.35  | 6.90  | 6  | 6  | 6   | 0.727  | 0.665 |
| Q86VP6 | Cullin-associated NEDD8-dissociated protein 1 OS=Homo sapiens GN=CAND1 PE=1 SV=2 - [CAND1_HUMAN]                                      | 89.90  | 12.11 | 19 | 19 | 30  | 0.915  | 0.492 |
| P04080 | Cystatin-B OS=Homo sapiens GN=CSTB PE=1 SV=2 - [CYTB_HUMAN]                                                                           | 33.79  | 30.61 | 3  | 3  | 11  | 0.215  | 0.183 |
| Q9UHD1 | Cysteine and histidine-rich domain-containing protein 1 OS=Homo sapiens GN=CHORDC1 PE=1 SV=2 - [CHRD1_HUMAN]                          | 9.79   | 6.93  | 2  | 2  | 3   | 0.217  | 0.249 |
| A8MVQ3 | CysteinyI-tRNA synthetase, isoform CRA_b OS=Homo sapiens GN=CARS PE=2 SV=1 - [A8MVQ3_HUMAN]                                           | 19.95  | 7.45  | 6  | 6  | 7   | 0.155  | 0.108 |
| P00167 | Cytochrome b5 OS=Homo sapiens GN=CYB5A PE=1 SV=2 - [CYB5_HUMAN]                                                                       | 13.39  | 27.61 | 4  | 4  | 5   | 0.502  | 0.436 |
| Q8IUI8 | Cytokine receptor-like factor 3 OS=Homo sapiens GN=CRLF3 PE=1 SV=2 - [CRLF3_HUMAN]                                                    | 32.75  | 11.09 | 6  | 6  | 11  | 0.361  | 0.320 |
| P28838 | Cytosol aminopeptidase OS=Homo sapiens GN=LAP3 PE=1 SV=3 - [AMPL_HUMAN]                                                               | 22.21  | 8.48  | 5  | 5  | 7   | 0.090  | 0.125 |
| Q96KP4 | Cytosolic non-specific dipeptidase OS=Homo sapiens GN=CNDP2 PE=1 SV=2 - [CNDP2_HUMAN]                                                 | 16.49  | 5.05  | 3  | 3  | 6   | 0.154  | 0.111 |
| B7Z522 | D-dopachrome tautomerase, isoform CRA_a OS=Homo sapiens GN=DDT PE=4 SV=1 - [B7Z522_HUMAN]                                             | 46.58  | 21.50 | 2  | 2  | 15  | 0.787  | 0.648 |
| P51397 | Death-associated protein 1 OS=Homo sapiens GN=DAP PE=1 SV=3 - [DAP1_HUMAN]                                                            | 9.95   | 23.53 | 3  | 3  | 4   | 0.166  | 0.251 |
| Q6UWP2 | Dehydrogenase/reductase SDR family member 11 OS=Homo sapiens GN=DHRS11 PE=1 SV=1 - [DHR11_HUMAN]                                      | 6.90   | 6.15  | 2  | 2  | 2   | 0.454  | 0.300 |

|        |                                                                                                                                            |        |       |    |    |     |       |       |
|--------|--------------------------------------------------------------------------------------------------------------------------------------------|--------|-------|----|----|-----|-------|-------|
| B7Z3I9 | Delta-aminolevulinic acid dehydratase OS=Homo sapiens PE=2 SV=1 - [B7Z3I9_HUMAN]                                                           | 98.15  | 23.00 | 7  | 7  | 33  | 0.727 | 0.474 |
| O43598 | Deoxyribonucleoside 5'-monophosphate N-glycosidase OS=Homo sapiens GN=RCL PE=1 SV=1 - [RCL_HUMAN]                                          | 7.65   | 12.07 | 3  | 3  | 3   | 0.621 | 0.660 |
| B4DYA6 | Dextrin (Actin depolymerizing factor), isoform CRA_a OS=Homo sapiens GN=DSTN PE=2 SV=1 - [B4DYA6_HUMAN]                                    | 14.83  | 14.86 | 2  | 3  | 5   | 0.163 | 0.139 |
| Q86TI2 | Dipeptidyl peptidase 9 OS=Homo sapiens GN=DPP9 PE=1 SV=3 - [DPP9_HUMAN]                                                                    | 5.44   | 2.20  | 2  | 2  | 2   | 0.203 | 0.134 |
| Q8NFP7 | Diphosphoinositol polyphosphate phosphohydrolase 3-alpha OS=Homo sapiens GN=NUDT10 PE=1 SV=1 - [NUDT10_HUMAN]                              | 15.08  | 14.63 | 2  | 2  | 4   | 0.074 | 0.035 |
| P53602 | Diphosphomevalonate decarboxylase OS=Homo sapiens GN=MVD PE=1 SV=1 - [MVD1_HUMAN]                                                          | 30.06  | 11.00 | 5  | 5  | 11  | 0.118 | 0.237 |
| Q16531 | DNA damage-binding protein 1 OS=Homo sapiens GN=DDB1 PE=1 SV=1 - [DDB1_HUMAN]                                                              | 47.89  | 8.86  | 10 | 10 | 16  | 0.232 | 0.199 |
| Q92878 | DNA repair protein RAD50 OS=Homo sapiens GN=RAD50 PE=1 SV=1 - [RAD50_HUMAN]                                                                | 5.34   | 1.07  | 2  | 2  | 2   | 0.110 | 0.075 |
| Q8WW22 | DnaJ homolog subfamily A member 4 OS=Homo sapiens GN=DNAJA4 PE=1 SV=1 - [DNAJA4_HUMAN]                                                     | 10.42  | 9.07  | 3  | 4  | 4   | 0.516 | 0.383 |
| P25685 | DnaJ homolog subfamily B member 1 OS=Homo sapiens GN=DNAJB1 PE=1 SV=4 - [DNJB1_HUMAN]                                                      | 14.09  | 13.24 | 5  | 5  | 5   | 0.508 | 0.315 |
| Q8WXX5 | DnaJ homolog subfamily C member 9 OS=Homo sapiens GN=DNAJC9 PE=1 SV=1 - [DNJC9_HUMAN]                                                      | 19.27  | 13.85 | 5  | 5  | 7   | 0.259 | 0.252 |
| P49959 | Double-strand break repair protein MRE11A OS=Homo sapiens GN=MRE11A PE=1 SV=3 - [MRE11_HUMAN]                                              | 5.11   | 2.82  | 2  | 2  | 2   | 0.079 | 0.076 |
| Q9UJU6 | Drebrin-like protein OS=Homo sapiens GN=DBNL PE=1 SV=1 - [DBNL_HUMAN]                                                                      | 10.45  | 7.67  | 3  | 3  | 3   | 0.234 | 0.310 |
| P36507 | Dual specificity mitogen-activated protein kinase kinase 2 OS=Homo sapiens GN=MAP2K2 PE=1 SV=1 - [MP2K2_HUMAN]                             | 11.64  | 11.00 | 4  | 4  | 4   | 0.382 | 0.175 |
| P46734 | Dual specificity mitogen-activated protein kinase kinase 3 OS=Homo sapiens GN=MAP2K3 PE=1 SV=2 - [MP2K3_HUMAN]                             | 42.77  | 23.92 | 8  | 8  | 13  | 0.120 | 0.137 |
| Q9P0J7 | E3 ubiquitin-protein ligase KCMF1 OS=Homo sapiens GN=KCMF1 PE=1 SV=2 - [KCMF1_HUMAN]                                                       | 9.38   | 4.20  | 2  | 2  | 3   | 0.424 | 0.204 |
| Q5XPI4 | E3 ubiquitin-protein ligase RNF123 OS=Homo sapiens GN=RNF123 PE=1 SV=1 - [RNF123_HUMAN]                                                    | 33.91  | 6.24  | 9  | 9  | 11  | 0.723 | 0.312 |
| Q5T4S7 | E3 ubiquitin-protein ligase UBR4 OS=Homo sapiens GN=UBR4 PE=1 SV=1 - [UBR4_HUMAN]                                                          | 29.46  | 1.16  | 9  | 9  | 11  | 0.323 | 0.182 |
| Q4VBZ6 | EEF1D protein OS=Homo sapiens GN=EEF1D PE=1 SV=1 - [Q4VBZ6_HUMAN]                                                                          | 12.59  | 13.62 | 3  | 4  | 4   | 0.070 | 0.051 |
| P68104 | Elongation factor 1-alpha 1 OS=Homo sapiens GN=EEF1A1 PE=1 SV=1 - [EF1A1_HUMAN]                                                            | 163.46 | 21.65 | 15 | 15 | 57  | 0.026 | 0.049 |
| P24534 | Elongation factor 1-beta OS=Homo sapiens GN=EEF1B2 PE=1 SV=3 - [EF1B_HUMAN]                                                                | 17.18  | 12.00 | 3  | 4  | 6   | 0.050 | 0.039 |
| P26641 | Elongation factor 1-gamma OS=Homo sapiens GN=EEF1G PE=1 SV=3 - [EF1G_HUMAN]                                                                | 49.89  | 23.11 | 12 | 12 | 16  | 0.059 | 0.051 |
| P13639 | Elongation factor 2 OS=Homo sapiens GN=EEF2 PE=1 SV=4 - [EF2_HUMAN]                                                                        | 138.37 | 26.34 | 24 | 24 | 45  | 0.115 | 0.079 |
| B7Z2X9 | Enolase OS=Homo sapiens GN=ENO2 PE=2 SV=1 - [B7Z2X9_HUMAN]                                                                                 | 85.35  | 17.65 | 5  | 8  | 31  | 0.266 | 0.284 |
| Q96CG1 | ETF1 protein OS=Homo sapiens GN=ETF1 PE=2 SV=1 - [Q96CG1_HUMAN]                                                                            | 13.82  | 8.91  | 4  | 4  | 5   | 0.065 | 0.111 |
| Q99447 | Ethanolamine-phosphate cytidyltransferase OS=Homo sapiens GN=PCYT2 PE=1 SV=1 - [PCYT2_HUMAN]                                               | 19.33  | 7.97  | 3  | 3  | 6   | 0.085 | 0.102 |
| P60842 | Eukaryotic initiation factor 4A-I OS=Homo sapiens GN=EIF4A1 PE=1 SV=1 - [IF4A1_HUMAN]                                                      | 83.30  | 33.25 | 6  | 12 | 23  | 0.233 | 0.338 |
| P38919 | Eukaryotic initiation factor 4A-III OS=Homo sapiens GN=EIF4A3 PE=1 SV=4 - [IF4A3_HUMAN]                                                    | 22.93  | 13.63 | 3  | 5  | 7   | 0.245 | 0.211 |
| O14602 | Eukaryotic translation initiation factor 1A, Y-chromosomal OS=Homo sapiens GN=EIF1AY PE=1 SV=4 - [IF1AY_HUMAN]                             | 35.17  | 41.67 | 9  | 9  | 13  | 0.163 | 0.202 |
| P05198 | Eukaryotic translation initiation factor 2 subunit 1 OS=Homo sapiens GN=EIF2S1 PE=1 SV=3 - [IF2A_HUMAN]                                    | 25.32  | 22.86 | 7  | 7  | 8   | 0.127 | 0.191 |
| P20042 | Eukaryotic translation initiation factor 2 subunit 2 OS=Homo sapiens GN=EIF2S2 PE=1 SV=2 - [IF2B_HUMAN]                                    | 22.38  | 14.71 | 4  | 4  | 7   | 0.073 | 0.140 |
| P41091 | Eukaryotic translation initiation factor 2 subunit 3 OS=Homo sapiens GN=EIF2S3 PE=1 SV=3 - [IF2G_HUMAN]                                    | 26.95  | 17.37 | 7  | 7  | 9   | 0.105 | 0.178 |
| Q9BQI3 | Eukaryotic translation initiation factor 2-alpha kinase 1 OS=Homo sapiens GN=EIF2AK1 PE=1 SV=2 - [E2AK1_HUMAN]                             | 4.91   | 2.54  | 2  | 2  | 2   | 0.127 | 0.114 |
| O75821 | Eukaryotic translation initiation factor 3 subunit G OS=Homo sapiens GN=EIF3G PE=1 SV=2 - [EIF3G_HUMAN]                                    | 25.62  | 14.37 | 6  | 6  | 8   | 0.054 | 0.043 |
| Q13347 | Eukaryotic translation initiation factor 3 subunit I OS=Homo sapiens GN=EIF3I PE=1 SV=1 - [EIF3I_HUMAN]                                    | 10.16  | 7.08  | 2  | 2  | 3   | 0.038 | 0.051 |
| O75822 | Eukaryotic translation initiation factor 3 subunit J OS=Homo sapiens GN=EIF3J PE=1 SV=2 - [EIF3J_HUMAN]                                    | 34.40  | 19.38 | 7  | 7  | 10  | 0.173 | 0.191 |
| E2QC29 | Eukaryotic translation initiation factor 3, subunit E interacting protein (Fragment) OS=Homo sapiens GN=EIF3EIP PE=4 SV=1 - [E2QC29_HUMAN] | 5.29   | 12.00 | 2  | 2  | 2   | 0.117 | 0.090 |
| P06730 | Eukaryotic translation initiation factor 4E OS=Homo sapiens GN=EIF4E PE=1 SV=2 - [IF4E_HUMAN]                                              | 17.96  | 25.35 | 5  | 5  | 6   | 0.268 | 0.237 |
| Q15056 | Eukaryotic translation initiation factor 4H OS=Homo sapiens GN=EIF4H PE=1 SV=5 - [IF4H_HUMAN]                                              | 7.74   | 8.87  | 3  | 3  | 3   | 0.370 | 0.110 |
| P55010 | Eukaryotic translation initiation factor 5 OS=Homo sapiens GN=EIF5 PE=1 SV=2 - [IF5_HUMAN]                                                 | 22.57  | 9.74  | 5  | 5  | 7   | 0.498 | 0.280 |
| P63241 | Eukaryotic translation initiation factor 5A-1 OS=Homo sapiens GN=EIF5A PE=1 SV=2 - [IF5A1_HUMAN]                                           | 45.49  | 16.23 | 4  | 4  | 15  | 0.309 | 0.461 |
| O60841 | Eukaryotic translation initiation factor 5B OS=Homo sapiens GN=EIF5B PE=1 SV=4 - [IF2P_HUMAN]                                              | 13.38  | 3.03  | 5  | 5  | 5   | 0.077 | 0.068 |
| O14980 | Exportin-1 OS=Homo sapiens GN=XPO1 PE=1 SV=1 - [XPO1_HUMAN]                                                                                | 15.29  | 3.17  | 4  | 5  | 6   | 0.577 | 0.199 |
| A8CZ64 | Extracellular signal-regulated kinase-2 splice variant OS=Homo sapiens GN=MAPK1 PE=2 SV=1 - [A8CZ64_HUMAN]                                 | 9.35   | 11.39 | 3  | 3  | 3   | 0.300 | 0.184 |
| P52907 | F-actin-capping protein subunit alpha-1 OS=Homo sapiens GN=CAPZA1 PE=1 SV=3 - [CAZA1_HUMAN]                                                | 35.89  | 24.13 | 5  | 7  | 13  | 0.273 | 0.194 |
| Q5TI86 | F-box protein 7 OS=Homo sapiens GN=FBXO7 PE=2 SV=1 - [Q5TI86_HUMAN]                                                                        | 28.84  | 11.27 | 6  | 6  | 10  | 0.788 | 0.537 |
| Q16658 | Fascin OS=Homo sapiens GN=FSCN1 PE=1 SV=3 - [FSCN1_HUMAN]                                                                                  | 37.64  | 15.82 | 10 | 10 | 14  | 0.519 | 0.374 |
| P49327 | Fatty acid synthase OS=Homo sapiens GN=FASN PE=1 SV=3 - [FAS_HUMAN]                                                                        | 196.48 | 13.50 | 34 | 34 | 67  | 0.065 | 0.163 |
| Q01469 | Fatty acid-binding protein, epidermal OS=Homo sapiens GN=FABP5 PE=1 SV=3 - [FABP5_HUMAN]                                                   | 26.35  | 31.11 | 5  | 5  | 9   | 0.377 | 0.275 |
| A6NDY9 | Filamin A OS=Homo sapiens GN=FLNA PE=2 SV=4 - [A6NDY9_HUMAN]                                                                               | 11.21  | 1.21  | 3  | 3  | 4   | 0.161 | 0.142 |
| P30043 | Flavin reductase OS=Homo sapiens GN=BLVRB PE=1 SV=3 - [BLVRB_HUMAN]                                                                        | 409.71 | 50.49 | 8  | 8  | 129 | 0.424 | 0.359 |
| P04075 | Fructose-bisphosphate aldolase A OS=Homo sapiens GN=ALDOA PE=1 SV=2 - [ALDOA_HUMAN]                                                        | 313.08 | 36.81 | 15 | 20 | 92  | 0.083 | 0.163 |
| P09972 | Fructose-bisphosphate aldolase C OS=Homo sapiens GN=ALDOC PE=1 SV=2 - [ALDOC_HUMAN]                                                        | 68.68  | 25.55 | 5  | 10 | 23  | 0.108 | 0.150 |
| P07954 | Fumarate hydratase, mitochondrial OS=Homo sapiens GN=FBP PE=1 SV=3 - [FUMH_HUMAN]                                                          | 18.61  | 6.47  | 4  | 4  | 6   | 0.425 | 0.377 |
| Q96GK7 | Fumarylacetoacetate hydrolase domain-containing protein 2A OS=Homo sapiens GN=FAHD2A PE=1 SV=1 - [FAH2A_HUMAN]                             | 5.23   | 6.69  | 2  | 2  | 2   | 0.170 | 0.184 |
| P17931 | Galectin-3 OS=Homo sapiens GN=LGALS3 PE=1 SV=5 - [LEG3_HUMAN]                                                                              | 25.07  | 25.20 | 7  | 7  | 9   | 0.064 | 0.118 |

|        |                                                                                                                     |         |        |    |    |      |       |       |
|--------|---------------------------------------------------------------------------------------------------------------------|---------|--------|----|----|------|-------|-------|
| P60520 | Gamma-aminobutyric acid receptor-associated protein-like 2 OS=Homo sapiens GN=GABARAPL2 PE=1 SV=1 - [GBRL2_HUMAN]   | 6.87    | 16.24  | 2  | 2  | 2    | 0.152 | 0.136 |
| Q13630 | GDP-L-fucose synthase OS=Homo sapiens GN=TSTA3 PE=1 SV=1 - [FCL_HUMAN]                                              | 61.42   | 25.86  | 9  | 9  | 18   | 0.284 | 0.259 |
| Q6PCE3 | Glucose 1,6-bisphosphate synthase OS=Homo sapiens GN=PGM2L1 PE=1 SV=3 - [PGM2L_HUMAN]                               | 34.66   | 9.49   | 5  | 6  | 11   | 0.449 | 0.278 |
| P11413 | Glucose-6-phosphate 1-dehydrogenase OS=Homo sapiens GN=G6PD PE=1 SV=4 - [G6PD_HUMAN]                                | 74.35   | 20.97  | 13 | 13 | 26   | 0.215 | 0.226 |
| P06744 | Glucose-6-phosphate isomerase OS=Homo sapiens GN=GPI PE=1 SV=4 - [G6PI_HUMAN]                                       | 141.79  | 25.99  | 19 | 19 | 51   | 0.065 | 0.107 |
| P48506 | Glutamate--cysteine ligase catalytic subunit OS=Homo sapiens GN=GCLC PE=1 SV=2 - [GSH1_HUMAN]                       | 98.03   | 21.04  | 14 | 14 | 31   | 0.473 | 0.345 |
| P48507 | Glutamate--cysteine ligase regulatory subunit OS=Homo sapiens GN=GCLM PE=1 SV=1 - [GSH0_HUMAN]                      | 30.43   | 31.02  | 7  | 7  | 10   | 0.519 | 0.346 |
| P15104 | Glutamine synthetase OS=Homo sapiens GN=GLUL PE=1 SV=4 - [GLNA_HUMAN]                                               | 30.16   | 13.40  | 7  | 7  | 11   | 0.052 | 0.073 |
| P35754 | Glutaredoxin-1 OS=Homo sapiens GN=GLRX PE=1 SV=2 - [GLRX1_HUMAN]                                                    | 8.00    | 28.30  | 3  | 3  | 3    | 0.340 | 0.549 |
| O76003 | Glutaredoxin-3 OS=Homo sapiens GN=GLRX3 PE=1 SV=2 - [GLRX3_HUMAN]                                                   | 18.61   | 14.63  | 5  | 5  | 6    | 0.514 | 0.409 |
| C8KIL8 | Glutathion reductase delta8 alternative splicing variant OS=Homo sapiens GN=GSR PE=2 SV=1 - [C8KIL8_HUMAN]          | 35.14   | 13.18  | 7  | 7  | 13   | 0.429 | 0.303 |
| P07203 | Glutathione peroxidase 1 OS=Homo sapiens GN=GPX1 PE=1 SV=4 - [GPX1_HUMAN]                                           | 9.87    | 9.36   | 2  | 2  | 3    | 1.208 | 0.615 |
| P78417 | Glutathione S-transferase omega-1 OS=Homo sapiens GN=GSTO1 PE=1 SV=2 - [GSTO1_HUMAN]                                | 123.22  | 40.66  | 10 | 10 | 39   | 0.335 | 0.262 |
| P48637 | Glutathione synthetase OS=Homo sapiens GN=GSS PE=1 SV=1 - [GSHB_HUMAN]                                              | 33.98   | 15.61  | 8  | 8  | 12   | 0.499 | 0.401 |
| P04406 | Glyceraldehyde-3-phosphate dehydrogenase OS=Homo sapiens GN=GAPDH PE=1 SV=3 - [G3P_HUMAN]                           | 278.89  | 42.99  | 16 | 16 | 100  | 0.115 | 0.294 |
| P41250 | Glycyl-tRNA synthetase OS=Homo sapiens GN=GARS PE=1 SV=3 - [SYG_HUMAN]                                              | 28.42   | 9.07   | 7  | 8  | 10   | 0.068 | 0.046 |
| P36959 | GMP reductase 1 OS=Homo sapiens GN=GMPR PE=1 SV=1 - [GMPR1_HUMAN]                                                   | 52.16   | 19.71  | 6  | 7  | 17   | 0.318 | 0.238 |
| Q14789 | Golgin subfamily B member 1 OS=Homo sapiens GN=GOLGB1 PE=1 SV=2 - [GOGB1_HUMAN]                                     | 10.02   | 1.01   | 2  | 4  | 4    | 0.160 | 0.278 |
| P62826 | GTP-binding nuclear protein Ran OS=Homo sapiens GN=RAN PE=1 SV=3 - [RAN_HUMAN]                                      | 116.04  | 36.11  | 9  | 9  | 36   | 0.406 | 0.377 |
| O00178 | GTP-binding protein 1 OS=Homo sapiens GN=GTPBP1 PE=1 SV=3 - [GTPB1_HUMAN]                                           | 5.90    | 2.39   | 2  | 2  | 2    | 0.169 | 0.141 |
| Q14C86 | GTPase-activating protein and VPS9 domain-containing protein 1 OS=Homo sapiens GN=GAPVD1 PE=1 SV=2 - [GAPD1_HUMAN]  | 27.18   | 4.80   | 7  | 7  | 9    | 0.499 | 0.207 |
| Q8TBN0 | Guanine nucleotide exchange factor for Rab-3A OS=Homo sapiens GN=RAB3IL1 PE=1 SV=1 - [R3GEF_HUMAN]                  | 5.04    | 4.71   | 2  | 2  | 2    | 0.256 | 0.216 |
| P63244 | Guanine nucleotide-binding protein subunit beta-2-like 1 OS=Homo sapiens GN=GNB2L1 PE=1 SV=3 - [GBLP_HUMAN]         | 24.04   | 13.25  | 4  | 4  | 8    | 0.064 | 0.063 |
| Q16774 | Guanylate kinase OS=Homo sapiens GN=GUK1 PE=1 SV=2 - [KGUA_HUMAN]                                                   | 11.74   | 9.64   | 2  | 2  | 4    | 0.212 | 0.151 |
| Q9H0R4 | Haloacid dehalogenase-like hydrolase domain-containing protein 2 OS=Homo sapiens GN=HDHD2 PE=1 SV=1 - [HDHD2_HUMAN] | 7.89    | 10.81  | 3  | 3  | 3    | 0.446 | 0.368 |
| Q9Y450 | HBS1-like protein OS=Homo sapiens GN=HBS1L PE=1 SV=1 - [HBS1L_HUMAN]                                                | 9.03    | 3.65   | 3  | 3  | 3    | 0.157 | 0.154 |
| Q7Z4H3 | HD domain-containing protein 2 OS=Homo sapiens GN=HDDC2 PE=1 SV=1 - [HDDC2_HUMAN]                                   | 4.99    | 3.43   | 2  | 2  | 2    | 0.291 | 0.309 |
| B8ZZL8 | Heat shock 10kDa protein 1 (Chaperonin 10), isoform CRA_b OS=Homo sapiens GN=HSPE1 PE=3 SV=1 - [B8ZZL8_HUMAN]       | 12.91   | 19.80  | 3  | 3  | 4    | 0.013 | 0.049 |
| P08107 | Heat shock 70 kDa protein 1A/1B OS=Homo sapiens GN=HSPA1A PE=1 SV=5 - [HSP71_HUMAN]                                 | 201.64  | 31.20  | 16 | 21 | 63   | 0.238 | 0.120 |
| P34932 | Heat shock 70 kDa protein 4 OS=Homo sapiens GN=HSPA4 PE=1 SV=4 - [HSP74_HUMAN]                                      | 107.97  | 28.21  | 22 | 23 | 34   | 0.300 | 0.227 |
| P11142 | Heat shock cognate 71 kDa protein OS=Homo sapiens GN=HSPA8 PE=1 SV=1 - [HSP7C_HUMAN]                                | 282.82  | 39.32  | 23 | 29 | 91   | 0.343 | 0.273 |
| Q92598 | Heat shock protein 105 kDa OS=Homo sapiens GN=HSPH1 PE=1 SV=1 - [HS105_HUMAN]                                       | 10.54   | 2.91   | 3  | 3  | 4    | 0.136 | 0.110 |
| P07900 | Heat shock protein HSP 90-alpha OS=Homo sapiens GN=HSP90AA1 PE=1 SV=5 - [HS90A_HUMAN]                               | 276.27  | 38.80  | 15 | 28 | 88   | 0.139 | 0.092 |
| P08238 | Heat shock protein HSP 90-beta OS=Homo sapiens GN=HSP90AB1 PE=1 SV=4 - [HS90B_HUMAN]                                | 143.13  | 31.22  | 8  | 22 | 45   | 0.298 | 0.102 |
| Q9NRV9 | Heme-binding protein 1 OS=Homo sapiens GN=HEBP1 PE=1 SV=1 - [HEBP1_HUMAN]                                           | 51.14   | 33.33  | 6  | 6  | 15   | 0.599 | 0.415 |
| Q9BXL5 | Hemogen OS=Homo sapiens GN=HEMGN PE=1 SV=1 - [HEMGN_HUMAN]                                                          | 32.83   | 15.29  | 8  | 8  | 12   | 0.086 | 0.050 |
| P69905 | Hemoglobin subunit alpha OS=Homo sapiens GN=HBA1 PE=1 SV=2 - [HBA_HUMAN]                                            | 4320.24 | 76.06  | 13 | 14 | 1324 | 0.894 | 0.725 |
| P68871 | Hemoglobin subunit beta OS=Homo sapiens GN=HBB PE=1 SV=2 - [HBB_HUMAN]                                              | 5787.45 | 100.00 | 8  | 16 | 1697 | 0.970 | 0.450 |
| P02042 | Hemoglobin subunit delta OS=Homo sapiens GN=HBD PE=1 SV=2 - [HBD_HUMAN]                                             | 2562.86 | 91.84  | 6  | 14 | 761  | 0.901 | 0.268 |
| P02100 | Hemoglobin subunit epsilon OS=Homo sapiens GN=HBE1 PE=1 SV=2 - [HBE_HUMAN]                                          | 895.47  | 39.46  | 3  | 6  | 310  | 0.123 | 0.968 |
| P69892 | Hemoglobin subunit gamma-2 OS=Homo sapiens GN=HBG2 PE=1 SV=2 - [HBG2_HUMAN]                                         | 7848.95 | 81.63  | 3  | 14 | 2305 | 0.174 | 1.171 |
| Q6B0K9 | Hemoglobin subunit mu OS=Homo sapiens GN=HBM PE=2 SV=1 - [HBM_HUMAN]                                                | 75.31   | 48.23  | 5  | 5  | 25   | 0.161 | 0.496 |
| P09105 | Hemoglobin subunit theta-1 OS=Homo sapiens GN=HBQ1 PE=1 SV=2 - [HBAT_HUMAN]                                         | 16.55   | 30.28  | 3  | 3  | 4    | 0.720 | 0.652 |
| P02008 | Hemoglobin subunit zeta OS=Homo sapiens GN=HBZ PE=1 SV=2 - [HBAZ_HUMAN]                                             | 1008.02 | 74.65  | 8  | 9  | 360  | 0.119 | 1.291 |
| D9YZU8 | Hemoglobin, gamma A OS=Homo sapiens GN=HBG1 PE=3 SV=1 - [D9YZU8_HUMAN]                                              | 6053.18 | 81.63  | 4  | 15 | 1857 | 0.253 | 0.933 |
| P51858 | Hepatoma-derived growth factor OS=Homo sapiens GN=HDGF PE=1 SV=1 - [HDGF_HUMAN]                                     | 56.32   | 35.42  | 8  | 8  | 17   | 0.036 | 0.058 |
| P09651 | Heterogeneous nuclear ribonucleoprotein A1 OS=Homo sapiens GN=HNRNPA1 PE=1 SV=5 - [ROA1_HUMAN]                      | 34.94   | 15.32  | 3  | 7  | 12   | 0.069 | 0.098 |
| O60812 | Heterogeneous nuclear ribonucleoprotein C-like 1 OS=Homo sapiens GN=HNRNPCL1 PE=1 SV=1 - [HNRCL_HUMAN]              | 5.88    | 6.83   | 2  | 2  | 2    | 0.342 | 0.126 |
| P52272 | Heterogeneous nuclear ribonucleoprotein M OS=Homo sapiens GN=HNRNPM PE=1 SV=3 - [HNRPM_HUMAN]                       | 8.69    | 4.38   | 3  | 3  | 3    | 0.044 | 0.047 |
| O60506 | Heterogeneous nuclear ribonucleoprotein Q OS=Homo sapiens GN=SYNCRIP PE=1 SV=2 - [HNRPQ_HUMAN]                      | 11.35   | 2.25   | 2  | 2  | 4    | 0.189 | 0.106 |
| P22626 | Heterogeneous nuclear ribonucleoproteins A2/B1 OS=Homo sapiens GN=HNRNPA2B1 PE=1 SV=2 - [ROA2_HUMAN]                | 47.36   | 24.36  | 7  | 10 | 16   | 0.063 | 0.045 |
| P49773 | Histidine triad nucleotide-binding protein 1 OS=Homo sapiens GN=HINT1 PE=1 SV=2 - [HINT1_HUMAN]                     | 40.95   | 29.37  | 5  | 5  | 14   | 0.275 | 0.246 |
| P16403 | Histone H1.2 OS=Homo sapiens GN=HIST1H1C PE=1 SV=2 - [H12_HUMAN]                                                    | 19.36   | 17.37  | 2  | 5  | 6    | 1.359 | 0.044 |
| O60814 | Histone H2B type 1-K OS=Homo sapiens GN=HIST1H2BK PE=1 SV=3 - [H2B1K_HUMAN]                                         | 15.92   | 24.60  | 4  | 4  | 6    | 1.186 | 0.154 |
| P68431 | Histone H3.1 OS=Homo sapiens GN=HIST1H3A PE=1 SV=2 - [H31_HUMAN]                                                    | 5.78    | 13.24  | 2  | 2  | 2    | 0.450 | 0.066 |
| P62805 | Histone H4 OS=Homo sapiens GN=HIST1H4A PE=1 SV=2 - [H4_HUMAN]                                                       | 11.07   | 21.36  | 2  | 2  | 3    | 2.858 | 0.098 |



|        |                                                                                                                                   |        |       |    |    |    |       |       |
|--------|-----------------------------------------------------------------------------------------------------------------------------------|--------|-------|----|----|----|-------|-------|
| B0V2L0 | HLA-B associated transcript 1 (Fragment) OS=Homo sapiens GN=BAT1 PE=4 SV=1 - [B0V2L0_HUMAN]                                       | 7.78   | 7.82  | 3  | 3  | 3  | 0.146 | 0.088 |
| B0UX83 | HLA-B associated transcript 3 OS=Homo sapiens GN=BAT3 PE=4 SV=1 - [B0UX83_HUMAN]                                                  | 4.61   | 1.95  | 2  | 2  | 2  | 0.180 | 0.101 |
| P50502 | Hsc70-interacting protein OS=Homo sapiens GN=ST13 PE=1 SV=2 - [F10A1_HUMAN]                                                       | 52.44  | 24.12 | 11 | 11 | 18 | 0.403 | 0.315 |
| Q16543 | Hsp90 co-chaperone Cdc37 OS=Homo sapiens GN=CDC37 PE=1 SV=1 - [CDC37_HUMAN]                                                       | 24.43  | 12.70 | 6  | 6  | 8  | 0.146 | 0.165 |
| Q16775 | Hydroxyacylglutathione hydrolase, mitochondrial OS=Homo sapiens GN=HAGH PE=1 SV=2 - [GLO2_HUMAN]                                  | 37.19  | 20.78 | 6  | 6  | 13 | 0.442 | 0.397 |
| P00492 | Hypoxanthine-guanine phosphoribosyltransferase OS=Homo sapiens GN=HPRT1 PE=1 SV=2 - [HPRT_HUMAN]                                  | 39.65  | 25.23 | 5  | 5  | 12 | 0.536 | 0.371 |
| P78318 | Immunoglobulin-binding protein 1 OS=Homo sapiens GN=IGBP1 PE=1 SV=1 - [IGBP1_HUMAN]                                               | 10.00  | 11.80 | 3  | 3  | 3  | 0.383 | 0.267 |
| Q14974 | Importin subunit beta-1 OS=Homo sapiens GN=KPNB1 PE=1 SV=2 - [IMB1_HUMAN]                                                         | 47.55  | 10.05 | 8  | 8  | 16 | 0.351 | 0.254 |
| O95373 | Importin-7 OS=Homo sapiens GN=IPO7 PE=1 SV=1 - [IPO7_HUMAN]                                                                       | 9.60   | 1.54  | 2  | 2  | 3  | 0.508 | 0.164 |
| Q96P70 | Importin-9 OS=Homo sapiens GN=IPO9 PE=1 SV=3 - [IPO9_HUMAN]                                                                       | 9.87   | 2.40  | 3  | 3  | 3  | 0.603 | 0.336 |
| Q15181 | Inorganic pyrophosphatase OS=Homo sapiens GN=PPA1 PE=1 SV=2 - [IPYR_HUMAN]                                                        | 26.28  | 24.57 | 7  | 7  | 8  | 0.243 | 0.159 |
| P14735 | Insulin-degrading enzyme OS=Homo sapiens GN=IDE PE=1 SV=4 - [IDE_HUMAN]                                                           | 12.11  | 4.12  | 4  | 4  | 4  | 0.355 | 0.339 |
| P80217 | Interferon-induced 35 kDa protein OS=Homo sapiens GN=IFI35 PE=1 SV=5 - [IN35_HUMAN]                                               | 6.56   | 7.34  | 2  | 2  | 2  | 0.214 | 0.152 |
| Q9HBB2 | Iron regulatory protein 1 OS=Homo sapiens GN=IRP1 PE=2 SV=1 - [Q9HBB2_HUMAN]                                                      | 21.96  | 6.33  | 6  | 6  | 8  | 0.226 | 0.226 |
| Q2TAA2 | Isoamyl acetate-hydrolyzing esterase 1 homolog OS=Homo sapiens GN=IAH1 PE=1 SV=1 - [IAH1_HUMAN]                                   | 5.62   | 10.08 | 2  | 2  | 2  | 0.405 | 0.278 |
| O75874 | Isocitrate dehydrogenase [NADP] cytoplasmic OS=Homo sapiens GN=IDH1 PE=1 SV=2 - [IDHC_HUMAN]                                      | 28.96  | 9.18  | 6  | 6  | 10 | 0.128 | 0.087 |
| P13645 | Keratin, type I cytoskeletal 10 OS=Homo sapiens GN=KRT10 PE=1 SV=6 - [K1C10_HUMAN]                                                | 22.70  | 8.05  | 5  | 5  | 7  | 0.067 | 1.832 |
| P35527 | Keratin, type I cytoskeletal 9 OS=Homo sapiens GN=KRT9 PE=1 SV=3 - [K1C9_HUMAN]                                                   | 48.75  | 14.93 | 9  | 9  | 14 | 0.052 | 0.575 |
| P04264 | Keratin, type II cytoskeletal 1 OS=Homo sapiens GN=KRT1 PE=1 SV=6 - [K2C1_HUMAN]                                                  | 60.86  | 15.53 | 11 | 12 | 18 | 0.042 | 0.631 |
| P35908 | Keratin, type II cytoskeletal 2 epidermal OS=Homo sapiens GN=KRT2 PE=1 SV=2 - [K22E_HUMAN]                                        | 7.24   | 4.23  | 2  | 2  | 2  | 0.017 | 2.814 |
| Q9HA64 | Ketosamine-3-kinase OS=Homo sapiens GN=FN3KRP PE=1 SV=2 - [KT3K_HUMAN]                                                            | 31.55  | 13.59 | 6  | 6  | 11 | 0.625 | 0.433 |
| P07195 | L-lactate dehydrogenase B chain OS=Homo sapiens GN=LDHB PE=1 SV=2 - [LDHB_HUMAN]                                                  | 243.80 | 38.02 | 13 | 15 | 72 | 0.396 | 0.313 |
| E9PH51 | L-lactate dehydrogenase OS=Homo sapiens GN=LDHA PE=3 SV=2 - [E9PH51_HUMAN]                                                        | 280.99 | 38.03 | 11 | 13 | 85 | 0.081 | 0.119 |
| Q7Z4W1 | L-xylulose reductase OS=Homo sapiens GN=DCXR PE=1 SV=2 - [DCXR_HUMAN]                                                             | 13.19  | 11.89 | 3  | 3  | 4  | 0.438 | 0.409 |
| Q04760 | Lactoylglutathione lyase OS=Homo sapiens GN=GLO1 PE=1 SV=4 - [LGUL_HUMAN]                                                         | 28.37  | 20.65 | 4  | 4  | 9  | 0.601 | 0.400 |
| Q9NS86 | LanC-like protein 2 OS=Homo sapiens GN=LANCL2 PE=1 SV=1 - [LANC2_HUMAN]                                                           | 5.67   | 4.67  | 2  | 2  | 2  | 0.711 | 0.532 |
| Q9BS40 | Latexin OS=Homo sapiens GN=LXN PE=1 SV=2 - [LXN_HUMAN]                                                                            | 52.70  | 27.03 | 6  | 6  | 17 | 0.286 | 0.229 |
| Q8N1G4 | Leucine-rich repeat-containing protein 47 OS=Homo sapiens GN=LRRC47 PE=1 SV=1 - [LRC47_HUMAN]                                     | 8.81   | 4.46  | 3  | 3  | 3  | 0.140 | 0.099 |
| P09960 | Leukotriene A-4 hydrolase OS=Homo sapiens GN=LTA4H PE=1 SV=2 - [LKHA4_HUMAN]                                                      | 27.50  | 11.29 | 8  | 8  | 10 | 0.635 | 0.354 |
| Q14847 | LIM and SH3 domain protein 1 OS=Homo sapiens GN=LASP1 PE=1 SV=2 - [LASP1_HUMAN]                                                   | 61.35  | 30.27 | 9  | 9  | 20 | 0.267 | 0.210 |
| P24666 | Low molecular weight phosphotyrosine protein phosphatase OS=Homo sapiens GN=ACP1 PE=1 SV=3 - [PPAC_HUMAN]                         | 51.40  | 41.77 | 6  | 6  | 17 | 0.562 | 0.408 |
| P05455 | Lupus La protein OS=Homo sapiens GN=SSB PE=1 SV=2 - [LA_HUMAN]                                                                    | 13.06  | 10.05 | 5  | 5  | 5  | 0.065 | 0.071 |
| Q5QPQ1 | Lysophospholipase II (Fragment) OS=Homo sapiens GN=LYPLA2 PE=2 SV=1 - [Q5QPQ1_HUMAN]                                              | 7.43   | 8.64  | 2  | 2  | 3  | 0.421 | 0.204 |
| P40925 | Malate dehydrogenase, cytoplasmic OS=Homo sapiens GN=MDH1 PE=1 SV=4 - [MDHC_HUMAN]                                                | 173.76 | 38.02 | 16 | 16 | 56 | 0.390 | 0.323 |
| A4D2A2 | MCM7 minichromosome maintenance deficient 7 (S. cerevisiae) OS=Homo sapiens GN=MCM7 PE=2 SV=1 - [A4D2A2_HUMAN]                    | 8.89   | 4.97  | 3  | 3  | 3  | 0.180 | 0.047 |
| P50579 | Methionine aminopeptidase 2 OS=Homo sapiens GN=METAP2 PE=1 SV=1 - [AMPM2_HUMAN]                                                   | 12.99  | 7.74  | 3  | 3  | 4  | 0.134 | 0.101 |
| P26038 | Moesin OS=Homo sapiens GN=MSN PE=1 SV=3 - [MOES_HUMAN]                                                                            | 102.21 | 25.13 | 16 | 21 | 33 | 0.317 | 0.313 |
| P60201 | Myelin proteolipid protein OS=Homo sapiens GN=PLP1 PE=1 SV=2 - [MYPR_HUMAN]                                                       | 19.73  | 14.08 | 4  | 4  | 6  | 0.585 | 1.280 |
| P12829 | Myosin light chain 4 OS=Homo sapiens GN=MYL4 PE=1 SV=3 - [MYL4_HUMAN]                                                             | 22.67  | 26.40 | 4  | 4  | 6  | 0.065 | 0.186 |
| P60660 | Myosin light polypeptide 6 OS=Homo sapiens GN=MYL6 PE=1 SV=2 - [MYL6_HUMAN]                                                       | 5.87   | 13.25 | 2  | 2  | 2  | 0.086 | 0.084 |
| P35580 | Myosin-10 OS=Homo sapiens GN=MYH10 PE=1 SV=3 - [MYH10_HUMAN]                                                                      | 151.39 | 15.94 | 22 | 36 | 52 | 0.044 | 0.210 |
| P35579 | Myosin-9 OS=Homo sapiens GN=MYH9 PE=1 SV=4 - [MYH9_HUMAN]                                                                         | 272.21 | 23.98 | 42 | 53 | 91 | 0.099 | 0.178 |
| Q9BUF9 | Myosin, light chain 9, regulatory OS=Homo sapiens GN=MYL9 PE=2 SV=1 - [Q9BUF9_HUMAN]                                              | 8.34   | 12.71 | 2  | 2  | 3  | 0.172 | 0.219 |
| P58546 | Myotrophin OS=Homo sapiens GN=MTPN PE=1 SV=2 - [MTPN_HUMAN]                                                                       | 26.51  | 22.03 | 2  | 2  | 9  | 0.538 | 0.381 |
| Q13765 | Nascent polypeptide-associated complex subunit alpha OS=Homo sapiens GN=NACA PE=1 SV=1 - [NACA_HUMAN]                             | 9.99   | 18.60 | 3  | 3  | 4  | 0.082 | 0.151 |
| Q15843 | NEDD8 OS=Homo sapiens GN=NEDD8 PE=1 SV=1 - [NEDD8_HUMAN]                                                                          | 21.40  | 39.51 | 5  | 5  | 8  | 0.170 | 0.178 |
| Q8TBC4 | NEDD8-activating enzyme E1 catalytic subunit OS=Homo sapiens GN=UBA3 PE=1 SV=2 - [UBA3_HUMAN]                                     | 5.94   | 4.10  | 2  | 2  | 2  | 0.284 | 0.216 |
| P61081 | NEDD8-conjugating enzyme Ubc12 OS=Homo sapiens GN=UBE2M PE=1 SV=1 - [UBC12_HUMAN]                                                 | 30.04  | 20.22 | 5  | 5  | 9  | 0.173 | 0.168 |
| Q8NBF2 | NHL repeat-containing protein 2 OS=Homo sapiens GN=NHLRC2 PE=1 SV=1 - [NHLRC2_HUMAN]                                              | 6.67   | 2.62  | 2  | 2  | 2  | 0.244 | 0.199 |
| C9J8U2 | Nicotinate phosphoribosyltransferase domain containing 1, isoform CRA_e OS=Homo sapiens GN=NAPRT1 PE=4 SV=1 - [C9J8U2_HUMAN]      | 27.39  | 9.59  | 5  | 5  | 8  | 0.456 | 0.306 |
| Q9GZT8 | NIF3-like protein 1 OS=Homo sapiens GN=NIF3L1 PE=1 SV=2 - [NIF3L_HUMAN]                                                           | 8.63   | 4.77  | 2  | 2  | 3  | 0.512 | 0.435 |
| Q5SYT8 | Novel protein similar to Pre-B cell enhancing factor (PBEF) (Fragment) OS=Homo sapiens GN=RP11-92J19.4 PE=1 SV=1 - [Q5SYT8_HUMAN] | 4.67   | 4.24  | 2  | 2  | 2  | 0.333 | 0.274 |
| Q9UNZ2 | NSFL1 cofactor p47 OS=Homo sapiens GN=NSFL1C PE=1 SV=2 - [NSF1C_HUMAN]                                                            | 42.32  | 23.51 | 8  | 8  | 12 | 0.575 | 0.297 |
| Q9Y266 | Nuclear migration protein nudC OS=Homo sapiens GN=NUDC PE=1 SV=1 - [NUDC_HUMAN]                                                   | 29.13  | 12.99 | 5  | 5  | 9  | 0.049 | 0.066 |
| P61970 | Nuclear transport factor 2 OS=Homo sapiens GN=NUTF2 PE=1 SV=1 - [NUTF2_HUMAN]                                                     | 12.37  | 11.02 | 2  | 2  | 4  | 0.592 | 0.437 |
| Q9H1E3 | Nuclear ubiquitous casein and cyclin-dependent kinases substrate OS=Homo sapiens GN=NUCKS1 PE=1 SV=1 - [NUCKS_HUMAN]              | 16.70  | 6.58  | 2  | 2  | 6  | 0.095 | 0.041 |

|        |                                                                                                                           |        |       |    |    |     |       |       |
|--------|---------------------------------------------------------------------------------------------------------------------------|--------|-------|----|----|-----|-------|-------|
| P67809 | Nuclease-sensitive element-binding protein 1 OS=Homo sapiens GN=YBX1 PE=1 SV=3 - [YBOX1_HUMAN]                            | 22.83  | 24.38 | 4  | 4  | 7   | 0.086 | 0.072 |
| P19338 | Nucleolin OS=Homo sapiens GN=NCL PE=1 SV=3 - [NUCL_HUMAN]                                                                 | 73.89  | 16.48 | 19 | 19 | 27  | 0.292 | 0.027 |
| P06748 | Nucleophosmin OS=Homo sapiens GN=NPM1 PE=1 SV=2 - [NPM_HUMAN]                                                             | 17.54  | 10.88 | 4  | 4  | 6   | 0.225 | 0.017 |
| Q32Q12 | Nucleoside diphosphate kinase OS=Homo sapiens GN=NME1-NME2 PE=2 SV=1 - [Q32Q12_HUMAN]                                     | 83.57  | 40.75 | 7  | 7  | 24  | 0.450 | 0.394 |
| Q7Z7N6 | NUDT1 protein OS=Homo sapiens GN=NUDT1 PE=2 SV=2 - [Q7Z7N6_HUMAN]                                                         | 8.06   | 17.31 | 2  | 2  | 2   | 0.040 | 0.053 |
| Q9NTK5 | Obg-like ATPase 1 OS=Homo sapiens GN=OLA1 PE=1 SV=2 - [OLA1_HUMAN]                                                        | 26.78  | 16.92 | 7  | 7  | 9   | 0.747 | 0.548 |
| Q9NQR4 | Omega-amidase NIT2 OS=Homo sapiens GN=NIT2 PE=1 SV=1 - [NIT2_HUMAN]                                                       | 11.33  | 11.23 | 3  | 3  | 4   | 0.239 | 0.233 |
| Q96CV9 | Optineurin OS=Homo sapiens GN=OPTN PE=1 SV=2 - [OPTN_HUMAN]                                                               | 28.51  | 13.17 | 8  | 8  | 10  | 0.131 | 0.171 |
| B4DTR3 | Oxysterol-binding protein OS=Homo sapiens GN=OSBP2 PE=2 SV=1 - [B4DTR3_HUMAN]                                             | 9.12   | 4.35  | 2  | 2  | 2   | 0.183 | 0.069 |
| Q5VU21 | PAI-1 mRNA-binding protein variant OS=Homo sapiens GN=SERBP1 PE=2 SV=1 - [Q5VU21_HUMAN]                                   | 20.68  | 11.89 | 4  | 4  | 7   | 0.195 | 0.128 |
| P20962 | Parathyrosin OS=Homo sapiens GN=PTMS PE=1 SV=2 - [PTMS_HUMAN]                                                             | 19.30  | 22.55 | 3  | 3  | 6   | 0.037 | 0.050 |
| Q9UBV8 | Peflin OS=Homo sapiens GN=PEF1 PE=1 SV=1 - [PEF1_HUMAN]                                                                   | 7.37   | 3.87  | 2  | 2  | 2   | 0.339 | 0.258 |
| P62937 | Peptidyl-prolyl cis-trans isomerase A OS=Homo sapiens GN=PPIA PE=1 SV=2 - [PPIA_HUMAN]                                    | 189.39 | 49.70 | 3  | 10 | 69  | 0.271 | 0.273 |
| Q00688 | Peptidyl-prolyl cis-trans isomerase FKBP3 OS=Homo sapiens GN=FKBP3 PE=1 SV=1 - [FKBP3_HUMAN]                              | 22.01  | 13.84 | 4  | 4  | 8   | 0.058 | 0.145 |
| Q02790 | Peptidyl-prolyl cis-trans isomerase FKBP4 OS=Homo sapiens GN=FKBP4 PE=1 SV=3 - [FKBP4_HUMAN]                              | 27.14  | 8.06  | 4  | 5  | 9   | 0.269 | 0.258 |
| Q9Y3C6 | Peptidyl-prolyl cis-trans isomerase-like 1 OS=Homo sapiens GN=PPIL1 PE=1 SV=1 - [PPIL1_HUMAN]                             | 15.83  | 27.71 | 4  | 4  | 5   | 0.304 | 0.139 |
| O60664 | Perilipin-3 OS=Homo sapiens GN=PLIN3 PE=1 SV=3 - [PLIN3_HUMAN]                                                            | 34.68  | 11.98 | 6  | 6  | 11  | 0.429 | 0.243 |
| Q06830 | Peroxiredoxin-1 OS=Homo sapiens GN=PRDX1 PE=1 SV=1 - [PRDX1_HUMAN]                                                        | 224.41 | 64.32 | 11 | 12 | 67  | 0.493 | 0.404 |
| P32119 | Peroxiredoxin-2 OS=Homo sapiens GN=PRDX2 PE=1 SV=5 - [PRDX2_HUMAN]                                                        | 718.77 | 59.60 | 10 | 11 | 228 | 0.781 | 0.580 |
| P30044 | Peroxiredoxin-5, mitochondrial OS=Homo sapiens GN=PRDX5 PE=1 SV=4 - [PRDX5_HUMAN]                                         | 13.23  | 11.68 | 2  | 2  | 4   | 0.080 | 0.046 |
| P30041 | Peroxiredoxin-6 OS=Homo sapiens GN=PRDX6 PE=1 SV=3 - [PRDX6_HUMAN]                                                        | 177.23 | 44.64 | 12 | 12 | 60  | 0.758 | 0.531 |
| Q8WW12 | PEST proteolytic signal-containing nuclear protein OS=Homo sapiens GN=PCNP PE=1 SV=2 - [PCNP_HUMAN]                       | 13.40  | 19.66 | 3  | 3  | 4   | 0.167 | 0.226 |
| Q9NSD9 | Phenylalanyl-tRNA synthetase beta chain OS=Homo sapiens GN=FARSB PE=1 SV=3 - [SYFB_HUMAN]                                 | 22.51  | 8.15  | 6  | 6  | 8   | 0.124 | 0.055 |
| Q9UKL6 | Phosphatidylcholine transfer protein OS=Homo sapiens GN=PCTP PE=1 SV=1 - [PPCT_HUMAN]                                     | 4.83   | 7.01  | 2  | 2  | 2   | 0.262 | 0.292 |
| P30086 | Phosphatidylethanolamine-binding protein 1 OS=Homo sapiens GN=PEBP1 PE=1 SV=3 - [PEBP1_HUMAN]                             | 37.41  | 34.76 | 5  | 5  | 11  | 0.667 | 0.435 |
| P48426 | Phosphatidylinositol-5-phosphate 4-kinase type-2 alpha OS=Homo sapiens GN=PIP4K2A PE=1 SV=2 - [PI42A_HUMAN]               | 21.14  | 9.61  | 4  | 4  | 7   | 0.433 | 0.383 |
| Q96G03 | Phosphoglucomutase-2 OS=Homo sapiens GN=PGM2 PE=1 SV=4 - [PGM2_HUMAN]                                                     | 33.18  | 11.44 | 7  | 8  | 12  | 0.439 | 0.358 |
| P00558 | Phosphoglycerate kinase 1 OS=Homo sapiens GN=PGK1 PE=1 SV=3 - [PGK1_HUMAN]                                                | 346.93 | 58.51 | 22 | 27 | 113 | 0.140 | 0.186 |
| P07205 | Phosphoglycerate kinase 2 OS=Homo sapiens GN=PGK2 PE=1 SV=3 - [PGK2_HUMAN]                                                | 63.25  | 19.66 | 2  | 9  | 23  | 0.132 | 0.189 |
| P18669 | Phosphoglycerate mutase 1 OS=Homo sapiens GN=PGAM1 PE=1 SV=2 - [PGAM1_HUMAN]                                              | 75.80  | 31.10 | 8  | 8  | 26  | 0.140 | 0.170 |
| A6NDG6 | Phosphoglycolate phosphatase OS=Homo sapiens GN=PGP PE=1 SV=1 - [PGP_HUMAN]                                               | 18.00  | 12.15 | 5  | 5  | 6   | 0.415 | 0.320 |
| Q9HAB8 | Phosphopantothenate--cysteine ligase OS=Homo sapiens GN=PPCS PE=1 SV=2 - [PPCS_HUMAN]                                     | 5.97   | 5.79  | 2  | 2  | 2   | 0.461 | 0.315 |
| O15067 | Phosphoribosylformylglycinamide synthase OS=Homo sapiens GN=PFAS PE=1 SV=4 - [PUR4_HUMAN]                                 | 52.46  | 9.49  | 13 | 13 | 18  | 0.374 | 0.286 |
| Q9Y617 | Phosphoserine aminotransferase OS=Homo sapiens GN=PSAT1 PE=1 SV=2 - [SERC_HUMAN]                                          | 59.69  | 26.22 | 11 | 12 | 22  | 0.041 | 0.043 |
| Q9GZP4 | PITH domain-containing protein 1 OS=Homo sapiens GN=PITHD1 PE=1 SV=1 - [PITH1_HUMAN]                                      | 47.16  | 26.54 | 5  | 5  | 17  | 0.364 | 0.294 |
| P13796 | Plastin-2 OS=Homo sapiens GN=LCP1 PE=1 SV=6 - [PLSL_HUMAN]                                                                | 42.49  | 14.99 | 10 | 10 | 14  | 0.171 | 0.224 |
| P43034 | Platelet-activating factor acetylhydrolase IB subunit alpha OS=Homo sapiens GN=PFAH1B1 PE=1 SV=2 - [LIS1_HUMAN]           | 17.21  | 10.24 | 4  | 4  | 5   | 0.319 | 0.303 |
| Q15102 | Platelet-activating factor acetylhydrolase IB subunit gamma OS=Homo sapiens GN=PFAH1B3 PE=1 SV=1 - [PA1B3_HUMAN]          | 10.98  | 15.15 | 3  | 4  | 4   | 0.765 | 0.576 |
| Q68Y55 | Poly(RC) binding protein 2 OS=Homo sapiens GN=PCBP2 PE=2 SV=1 - [Q68Y55_HUMAN]                                            | 30.03  | 15.71 | 2  | 5  | 9   | 0.131 | 0.121 |
| Q15365 | Poly(rC)-binding protein 1 OS=Homo sapiens GN=PCBP1 PE=1 SV=2 - [PCBP1_HUMAN]                                             | 33.09  | 15.45 | 3  | 6  | 10  | 0.171 | 0.137 |
| P26599 | Polypyrimidine tract-binding protein 1 OS=Homo sapiens GN=PTBP1 PE=1 SV=1 - [PTBP1_HUMAN]                                 | 12.55  | 4.71  | 3  | 3  | 4   | 0.179 | 0.078 |
| O60925 | Prefoldin subunit 1 OS=Homo sapiens GN=PFDN1 PE=1 SV=2 - [PFD1_HUMAN]                                                     | 16.25  | 19.67 | 3  | 3  | 6   | 0.153 | 0.232 |
| Q9UHV9 | Prefoldin subunit 2 OS=Homo sapiens GN=PFDN2 PE=1 SV=1 - [PFD2_HUMAN]                                                     | 21.85  | 27.27 | 4  | 4  | 7   | 0.098 | 0.156 |
| Q9NQP4 | Prefoldin subunit 4 OS=Homo sapiens GN=PFDN4 PE=1 SV=1 - [PFD4_HUMAN]                                                     | 6.67   | 16.42 | 2  | 2  | 2   | 0.164 | 0.223 |
| Q99471 | Prefoldin subunit 5 OS=Homo sapiens GN=PFDN5 PE=1 SV=2 - [PFD5_HUMAN]                                                     | 5.31   | 8.44  | 2  | 2  | 2   | 0.087 | 0.157 |
| O15212 | Prefoldin subunit 6 OS=Homo sapiens GN=PFDN6 PE=1 SV=1 - [PFD6_HUMAN]                                                     | 13.91  | 17.05 | 4  | 4  | 5   | 0.108 | 0.214 |
| Q93008 | Probable ubiquitin carboxyl-terminal hydrolase FAF-X OS=Homo sapiens GN=USP9X PE=1 SV=3 - [USP9X_HUMAN]                   | 56.17  | 5.60  | 15 | 15 | 19  | 0.276 | 0.190 |
| P07737 | Profilin-1 OS=Homo sapiens GN=PFN1 PE=1 SV=2 - [PROF1_HUMAN]                                                              | 41.92  | 32.14 | 5  | 5  | 13  | 0.232 | 0.105 |
| Q8WUM4 | Programmed cell death 6-interacting protein OS=Homo sapiens GN=PDC6IP PE=1 SV=1 - [PDC6I_HUMAN]                           | 52.29  | 11.75 | 12 | 12 | 17  | 0.527 | 0.350 |
| O14737 | Programmed cell death protein 5 OS=Homo sapiens GN=PDCD5 PE=1 SV=3 - [PDCD5_HUMAN]                                        | 15.73  | 31.20 | 5  | 5  | 5   | 0.283 | 0.174 |
| Q9UQ80 | Proliferation-associated protein 2G4 OS=Homo sapiens GN=PA2G4 PE=1 SV=3 - [PA2G4_HUMAN]                                   | 59.33  | 29.19 | 12 | 12 | 19  | 0.268 | 0.729 |
| P48147 | Prolyl endopeptidase OS=Homo sapiens GN=PREP PE=1 SV=2 - [PPCE_HUMAN]                                                     | 6.09   | 2.54  | 2  | 2  | 2   | 0.315 | 0.141 |
| B4DP21 | Prostaglandin E synthase 3 (Cytosolic), isoform CRA_d OS=Homo sapiens GN=PTGES3 PE=2 SV=1 - [B4DP21_HUMAN]                | 19.70  | 28.46 | 5  | 5  | 7   | 0.245 | 0.124 |
| A8K3Z3 | Proteasome (Prosome, macropain) 26S subunit, ATPase, 5, isoform CRA_b OS=Homo sapiens GN=PSMC5 PE=2 SV=1 - [A8K3Z3_HUMAN] | 26.49  | 8.04  | 3  | 4  | 8   | 0.331 | 0.151 |
| B1AJY5 | Proteasome (Prosome, macropain) 26S subunit, non-ATPase, 10 OS=Homo sapiens GN=PSMD10 PE=4 SV=1 - [B1AJY5_HUMAN]          | 12.50  | 21.08 | 3  | 3  | 4   | 0.653 | 0.399 |
| Q5QPM7 | Proteasome (Prosome, macropain) inhibitor subunit 1 (PI31) OS=Homo sapiens GN=PSMF1 PE=2 SV=2 - [Q5QPM7_HUMAN]            | 14.81  | 11.79 | 4  | 4  | 6   | 0.390 | 0.332 |

|        |                                                                                                              |        |       |    |    |    |       |       |
|--------|--------------------------------------------------------------------------------------------------------------|--------|-------|----|----|----|-------|-------|
| Q06323 | Proteasome activator complex subunit 1 OS=Homo sapiens GN=PSME1 PE=1 SV=1 - [PSME1_HUMAN]                    | 52.58  | 38.96 | 10 | 10 | 17 | 0.388 | 0.201 |
| Q9UL46 | Proteasome activator complex subunit 2 OS=Homo sapiens GN=PSME2 PE=1 SV=4 - [PSME2_HUMAN]                    | 48.80  | 23.43 | 6  | 6  | 15 | 0.485 | 0.269 |
| P25787 | Proteasome subunit alpha type-2 OS=Homo sapiens GN=PSMA2 PE=1 SV=2 - [PSA2_HUMAN]                            | 16.42  | 14.96 | 5  | 5  | 6  | 0.522 | 0.327 |
| P25788 | Proteasome subunit alpha type-3 OS=Homo sapiens GN=PSMA3 PE=1 SV=2 - [PSA3_HUMAN]                            | 61.54  | 28.63 | 9  | 10 | 20 | 0.478 | 0.298 |
| P28066 | Proteasome subunit alpha type-5 OS=Homo sapiens GN=PSMA5 PE=1 SV=3 - [PSA5_HUMAN]                            | 38.56  | 28.22 | 4  | 5  | 11 | 0.518 | 0.325 |
| P60900 | Proteasome subunit alpha type-6 OS=Homo sapiens GN=PSMA6 PE=1 SV=1 - [PSA6_HUMAN]                            | 42.41  | 26.42 | 7  | 7  | 12 | 0.484 | 0.308 |
| O14818 | Proteasome subunit alpha type-7 OS=Homo sapiens GN=PSMA7 PE=1 SV=1 - [PSA7_HUMAN]                            | 54.29  | 34.27 | 9  | 9  | 18 | 0.484 | 0.306 |
| P20618 | Proteasome subunit beta type-1 OS=Homo sapiens GN=PSMB1 PE=1 SV=2 - [PSB1_HUMAN]                             | 24.42  | 19.92 | 4  | 4  | 8  | 0.513 | 0.396 |
| P49721 | Proteasome subunit beta type-2 OS=Homo sapiens GN=PSMB2 PE=1 SV=1 - [PSB2_HUMAN]                             | 15.57  | 13.93 | 5  | 5  | 5  | 0.508 | 0.328 |
| P28070 | Proteasome subunit beta type-4 OS=Homo sapiens GN=PSMB4 PE=1 SV=4 - [PSB4_HUMAN]                             | 24.21  | 7.20  | 2  | 2  | 7  | 0.462 | 0.327 |
| P28074 | Proteasome subunit beta type-5 OS=Homo sapiens GN=PSMB5 PE=1 SV=3 - [PSB5_HUMAN]                             | 26.57  | 18.63 | 5  | 5  | 8  | 0.564 | 0.372 |
| P28072 | Proteasome subunit beta type-6 OS=Homo sapiens GN=PSMB6 PE=1 SV=4 - [PSB6_HUMAN]                             | 27.42  | 19.67 | 5  | 5  | 9  | 0.499 | 0.299 |
| Q5VYK3 | Proteasome-associated protein ECM29 homolog OS=Homo sapiens GN=ECM29 PE=1 SV=2 - [ECM29_HUMAN]               | 5.31   | 0.81  | 2  | 2  | 2  | 0.307 | 0.138 |
| A8MTP3 | Protein arginine methyltransferase 5, isoform CRA_c OS=Homo sapiens GN=PRMT5 PE=4 SV=1 - [A8MTP3_HUMAN]      | 13.66  | 7.73  | 5  | 5  | 5  | 0.403 | 0.322 |
| Q9UKV8 | Protein argonaute-2 OS=Homo sapiens GN=EIF2C2 PE=1 SV=3 - [AGO2_HUMAN]                                       | 13.45  | 5.59  | 5  | 5  | 5  | 0.221 | 0.360 |
| Q5TDH0 | Protein DDI1 homolog 2 OS=Homo sapiens GN=DDI2 PE=1 SV=1 - [DDI2_HUMAN]                                      | 56.82  | 20.05 | 9  | 9  | 19 | 0.696 | 0.402 |
| Q99497 | Protein DJ-1 OS=Homo sapiens GN=PARK7 PE=1 SV=2 - [PARK7_HUMAN]                                              | 89.59  | 44.97 | 9  | 9  | 29 | 0.533 | 0.343 |
| Q9NRY5 | Protein FAM114A2 OS=Homo sapiens GN=FAM114A2 PE=1 SV=4 - [F1142_HUMAN]                                       | 29.80  | 16.24 | 7  | 7  | 9  | 0.427 | 0.278 |
| Q9NUQ9 | Protein FAM49B OS=Homo sapiens GN=FAM49B PE=1 SV=1 - [FA49B_HUMAN]                                           | 8.35   | 7.41  | 3  | 3  | 3  | 0.542 | 0.290 |
| Q8WZA0 | Protein LZIC OS=Homo sapiens GN=LZIC PE=1 SV=1 - [LZIC_HUMAN]                                                | 18.02  | 16.32 | 4  | 4  | 6  | 0.532 | 0.363 |
| Q15435 | Protein phosphatase 1 regulatory subunit 7 OS=Homo sapiens GN=PPP1R7 PE=1 SV=1 - [PP1R7_HUMAN]               | 17.44  | 6.94  | 3  | 3  | 6  | 0.350 | 0.313 |
| P35813 | Protein phosphatase 1A OS=Homo sapiens GN=PPM1A PE=1 SV=1 - [PPM1A_HUMAN]                                    | 21.61  | 16.23 | 5  | 6  | 7  | 0.407 | 0.241 |
| A6PVN5 | Protein phosphatase 2A activator, regulatory subunit 4 OS=Homo sapiens GN=PPP2R4 PE=4 SV=1 - [A6PVN5_HUMAN]  | 17.18  | 10.03 | 4  | 4  | 6  | 0.647 | 0.312 |
| Q9Y570 | Protein phosphatase methylesterase 1 OS=Homo sapiens GN=PPME1 PE=1 SV=3 - [PPME1_HUMAN]                      | 32.44  | 22.54 | 8  | 8  | 11 | 0.215 | 0.210 |
| Q96M27 | Protein PRRC1 OS=Homo sapiens GN=PRRC1 PE=1 SV=1 - [PRRC1_HUMAN]                                             | 5.71   | 3.15  | 2  | 2  | 2  | 0.162 | 0.112 |
| P26447 | Protein S100-A4 OS=Homo sapiens GN=S100A4 PE=1 SV=1 - [S10A4_HUMAN]                                          | 94.63  | 36.63 | 5  | 5  | 29 | 0.952 | 0.483 |
| P06703 | Protein S100-A6 OS=Homo sapiens GN=S100A6 PE=1 SV=1 - [S10A6_HUMAN]                                          | 120.91 | 40.00 | 5  | 6  | 42 | 0.514 | 0.303 |
| B7Z972 | Protein-L-isoaspartate O-methyltransferase OS=Homo sapiens GN=PCMT1 PE=2 SV=1 - [B7Z972_HUMAN]               | 26.51  | 18.23 | 4  | 4  | 9  | 0.708 | 0.569 |
| Q567Q5 | PSMA4 protein OS=Homo sapiens GN=PSMA4 PE=2 SV=1 - [Q567Q5_HUMAN]                                            | 49.23  | 31.05 | 8  | 8  | 16 | 0.483 | 0.294 |
| P00491 | Purine nucleoside phosphorylase OS=Homo sapiens GN=PNP PE=1 SV=2 - [PNPH_HUMAN]                              | 194.95 | 45.33 | 12 | 12 | 62 | 0.391 | 0.263 |
| Q53XA7 | Putative uncharacterized protein DKFZp686F13224 OS=Homo sapiens GN=DKFZp686F13224 PE=2 SV=1 - [Q53XA7_HUMAN] | 14.34  | 8.31  | 3  | 3  | 4  | 0.527 | 0.337 |
| Q96GD0 | Pyridoxal phosphate phosphatase OS=Homo sapiens GN=PDXP PE=1 SV=2 - [PLPP_HUMAN]                             | 7.13   | 9.12  | 2  | 2  | 2  | 0.610 | 0.400 |
| P14618 | Pyruvate kinase isozymes M1/M2 OS=Homo sapiens GN=PKM2 PE=1 SV=4 - [KPYM_HUMAN]                              | 54.68  | 13.18 | 8  | 9  | 19 | 0.085 | 0.076 |
| P30613 | Pyruvate kinase isozymes R/L OS=Homo sapiens GN=PKLR PE=1 SV=2 - [KPYR_HUMAN]                                | 126.04 | 31.18 | 19 | 20 | 43 | 0.302 | 0.254 |
| P50395 | Rab GDP dissociation inhibitor beta OS=Homo sapiens GN=GDI2 PE=1 SV=2 - [GDIB_HUMAN]                         | 111.07 | 33.71 | 11 | 15 | 36 | 0.522 | 0.438 |
| P35241 | Radixin OS=Homo sapiens GN=RDX PE=1 SV=1 - [RADI_HUMAN]                                                      | 47.45  | 15.27 | 6  | 12 | 16 | 0.512 | 0.474 |
| P46060 | Ran GTPase-activating protein 1 OS=Homo sapiens GN=RANGAP1 PE=1 SV=1 - [RAGP1_HUMAN]                         | 22.80  | 8.69  | 5  | 5  | 7  | 0.301 | 0.240 |
| P43487 | Ran-specific GTPase-activating protein OS=Homo sapiens GN=RANBP1 PE=1 SV=1 - [RANG_HUMAN]                    | 24.47  | 23.38 | 5  | 5  | 8  | 0.388 | 0.330 |
| P15153 | Ras-related C3 botulinum toxin substrate 2 OS=Homo sapiens GN=RAC2 PE=1 SV=1 - [RAC2_HUMAN]                  | 15.33  | 19.27 | 3  | 4  | 5  | 0.614 | 0.231 |
| P61026 | Ras-related protein Rab-10 OS=Homo sapiens GN=RAB10 PE=1 SV=1 - [RAB10_HUMAN]                                | 15.90  | 15.00 | 2  | 3  | 5  | 0.275 | 0.224 |
| P62491 | Ras-related protein Rab-11A OS=Homo sapiens GN=RAB11A PE=1 SV=3 - [RB11A_HUMAN]                              | 15.16  | 7.41  | 2  | 2  | 5  | 0.568 | 0.203 |
| P61106 | Ras-related protein Rab-14 OS=Homo sapiens GN=RAB14 PE=1 SV=4 - [RAB14_HUMAN]                                | 11.18  | 11.16 | 3  | 3  | 4  | 0.559 | 0.391 |
| P62820 | Ras-related protein Rab-1A OS=Homo sapiens GN=RAB1A PE=1 SV=3 - [RAB1A_HUMAN]                                | 41.35  | 33.17 | 3  | 8  | 13 | 0.642 | 0.455 |
| Q9H0U4 | Ras-related protein Rab-1B OS=Homo sapiens GN=RAB1B PE=1 SV=1 - [RAB1B_HUMAN]                                | 52.77  | 34.83 | 4  | 9  | 17 | 0.583 | 0.355 |
| O43665 | Regulator of G-protein signaling 10 OS=Homo sapiens GN=RGSL10 PE=1 SV=2 - [RGS10_HUMAN]                      | 16.16  | 10.40 | 2  | 2  | 5  | 0.408 | 0.431 |
| P00352 | Retinal dehydrogenase 1 OS=Homo sapiens GN=ALDH1A1 PE=1 SV=2 - [AL1A1_HUMAN]                                 | 17.58  | 6.59  | 4  | 4  | 5  | 3.310 | 2.621 |
| P52565 | Rho GDP-dissociation inhibitor 1 OS=Homo sapiens GN=ARHGDI1 PE=1 SV=3 - [GDIR1_HUMAN]                        | 30.94  | 18.14 | 4  | 4  | 9  | 0.391 | 0.283 |
| P13489 | Ribonuclease inhibitor OS=Homo sapiens GN=RNH1 PE=1 SV=2 - [RINI_HUMAN]                                      | 74.25  | 28.42 | 13 | 13 | 22 | 0.474 | 0.245 |
| P49247 | Ribose-5-phosphate isomerase OS=Homo sapiens GN=RPIA PE=1 SV=3 - [RPIA_HUMAN]                                | 28.97  | 13.83 | 5  | 5  | 9  | 0.591 | 0.552 |
| P60891 | Ribose-phosphate pyrophosphokinase 1 OS=Homo sapiens GN=PRPS1 PE=1 SV=2 - [PRPS1_HUMAN]                      | 42.22  | 25.16 | 4  | 8  | 13 | 0.846 | 0.445 |
| Q5VVC8 | Ribosomal protein L11 (Fragment) OS=Homo sapiens GN=RPL11 PE=2 SV=1 - [Q5VVC8_HUMAN]                         | 7.46   | 8.05  | 2  | 2  | 3  | 0.191 | 0.093 |
| C9JNW5 | Ribosomal protein L24, isoform CRA_e OS=Homo sapiens GN=RPL24 PE=4 SV=1 - [C9JNW5_HUMAN]                     | 16.72  | 16.00 | 5  | 5  | 5  | 0.075 | 0.036 |
| B3KTM6 | Ribosomal protein L5, isoform CRA_b OS=Homo sapiens GN=RPL5 PE=2 SV=1 - [B3KTM6_HUMAN]                       | 8.56   | 10.93 | 3  | 3  | 3  | 0.143 | 0.043 |
| Q5T8U3 | Ribosomal protein L7a (Fragment) OS=Homo sapiens GN=RPL7A PE=4 SV=1 - [Q5T8U3_HUMAN]                         | 11.84  | 9.95  | 3  | 3  | 3  | 0.262 | 0.101 |
| D6R9B6 | Ribosomal protein S3A, isoform CRA_e OS=Homo sapiens GN=RPS3A PE=4 SV=1 - [D6R9B6_HUMAN]                     | 23.79  | 19.31 | 4  | 4  | 8  | 0.047 | 0.035 |
| O00442 | RNA 3'-terminal phosphate cyclase OS=Homo sapiens GN=RTCD1 PE=1 SV=1 - [RTC1_HUMAN]                          | 6.99   | 2.73  | 2  | 2  | 2  | 0.441 | 0.424 |

|        |                                                                                                                                       |        |       |    |    |     |       |       |
|--------|---------------------------------------------------------------------------------------------------------------------------------------|--------|-------|----|----|-----|-------|-------|
| Q9Y265 | RuvB-like 1 OS=Homo sapiens GN=RUVBL1 PE=1 SV=1 - [RUVB1_HUMAN]                                                                       | 27.73  | 12.94 | 6  | 6  | 8   | 0.261 | 0.272 |
| Q9Y230 | RuvB-like 2 OS=Homo sapiens GN=RUVBL2 PE=1 SV=3 - [RUVB2_HUMAN]                                                                       | 42.37  | 19.44 | 9  | 9  | 13  | 0.265 | 0.278 |
| P31153 | S-adenosylmethionine synthase isoform type-2 OS=Homo sapiens GN=MAT2A PE=1 SV=1 - [METK2_HUMAN]                                       | 9.17   | 3.80  | 2  | 2  | 3   | 0.407 | 0.184 |
| P10768 | S-formylglutathione hydrolase OS=Homo sapiens GN=ESD PE=1 SV=2 - [ESTD_HUMAN]                                                         | 39.86  | 10.28 | 4  | 4  | 13  | 0.538 | 0.401 |
| Q9UDX3 | SEC14-like protein 4 OS=Homo sapiens GN=SEC14L4 PE=2 SV=1 - [S14L4_HUMAN]                                                             | 13.08  | 10.34 | 5  | 5  | 5   | 0.430 | 0.405 |
| Q13228 | Selenium-binding protein 1 OS=Homo sapiens GN=SELENBP1 PE=1 SV=2 - [SBP1_HUMAN]                                                       | 168.09 | 32.42 | 16 | 16 | 52  | 0.517 | 0.485 |
| Q96GA7 | Serine dehydratase-like OS=Homo sapiens GN=SDSL PE=1 SV=1 - [SDSL_HUMAN]                                                              | 8.80   | 6.99  | 3  | 3  | 3   | 0.133 | 0.163 |
| Q07955 | Serine/arginine-rich splicing factor 1 OS=Homo sapiens GN=SRSF1 PE=1 SV=2 - [SRSF1_HUMAN]                                             | 5.69   | 7.66  | 2  | 2  | 2   | 0.131 | 0.051 |
| Q08170 | Serine/arginine-rich splicing factor 4 OS=Homo sapiens GN=SRSF4 PE=1 SV=2 - [SRSF4_HUMAN]                                             | 4.85   | 4.05  | 2  | 2  | 2   | 0.558 | 0.049 |
| O95747 | Serine/threonine-protein kinase OSR1 OS=Homo sapiens GN=OXSR1 PE=1 SV=1 - [OXSR1_HUMAN]                                               | 24.07  | 12.33 | 7  | 7  | 9   | 0.433 | 0.365 |
| P30153 | Serine/threonine-protein phosphatase 2A 65 kDa regulatory subunit A alpha isoform OS=Homo sapiens GN=PPP2R1A PE=1 SV=4 - [2AAA_HUMAN] | 93.94  | 19.69 | 12 | 16 | 32  | 0.781 | 0.363 |
| P67775 | Serine/threonine-protein phosphatase 2A catalytic subunit alpha isoform OS=Homo sapiens GN=PPP2CA PE=1 SV=1 - [PP2AA_HUMAN]           | 15.67  | 5.18  | 2  | 2  | 5   | 0.436 | 0.310 |
| O15084 | Serine/threonine-protein phosphatase 6 regulatory ankyrin repeat subunit A OS=Homo sapiens GN=ANKRD28 PE=1 SV=5 - [ANR28_HUMAN]       | 6.34   | 3.23  | 2  | 2  | 2   | 0.211 | 0.176 |
| B4DDZ8 | Serine/threonine-protein phosphatase OS=Homo sapiens GN=PPP5C PE=2 SV=1 - [B4DDZ8_HUMAN]                                              | 14.02  | 8.64  | 5  | 5  | 5   | 0.299 | 0.355 |
| P02787 | Serotransferrin OS=Homo sapiens GN=TF PE=1 SV=3 - [TRFE_HUMAN]                                                                        | 9.00   | 3.72  | 3  | 3  | 3   | 0.188 | 0.073 |
| Q9BXP5 | Serrate RNA effector molecule homolog OS=Homo sapiens GN=SRRT PE=1 SV=1 - [SRRT_HUMAN]                                                | 4.75   | 1.94  | 2  | 2  | 2   | 0.234 | 0.124 |
| P49591 | Seryl-tRNA synthetase, cytoplasmic OS=Homo sapiens GN=SARS PE=1 SV=3 - [SYSC_HUMAN]                                                   | 28.41  | 9.34  | 6  | 6  | 10  | 0.030 | 0.078 |
| B2REB8 | SET nuclear oncogene OS=Homo sapiens GN=SET PE=3 SV=1 - [B2REB8_HUMAN]                                                                | 5.34   | 6.42  | 2  | 2  | 2   | 0.030 | 0.030 |
| Q5T123 | SH3 domain binding glutamic acid-rich protein like 3 OS=Homo sapiens GN=SH3BGRL3 PE=2 SV=1 - [Q5T123_HUMAN]                           | 28.30  | 28.41 | 3  | 3  | 10  | 0.132 | 0.105 |
| O75368 | SH3 domain-binding glutamic acid-rich-like protein OS=Homo sapiens GN=SH3BGRL PE=1 SV=1 - [SH3L1_HUMAN]                               | 67.16  | 58.77 | 7  | 7  | 21  | 0.372 | 0.275 |
| B7ZC39 | SH3-domain GRB2-like endophilin B2 OS=Homo sapiens GN=SH3GLB2 PE=4 SV=1 - [B7ZC39_HUMAN]                                              | 7.51   | 5.61  | 3  | 3  | 3   | 0.298 | 0.229 |
| Q9NR45 | Sialic acid synthase OS=Homo sapiens GN=NANS PE=1 SV=2 - [SIAS_HUMAN]                                                                 | 25.74  | 11.98 | 6  | 6  | 9   | 0.271 | 0.258 |
| O76094 | Signal recognition particle 72 kDa protein OS=Homo sapiens GN=SRP72 PE=1 SV=3 - [SRP72_HUMAN]                                         | 10.57  | 6.26  | 3  | 4  | 4   | 0.203 | 0.106 |
| Q1KLZ6 | Signal transducer and activator of transcription 5A variant delta5 OS=Homo sapiens GN=STAT5A PE=2 SV=1 - [Q1KLZ6_HUMAN]               | 12.46  | 3.93  | 3  | 3  | 4   | 0.423 | 0.206 |
| C0H5W9 | SNX6 protein OS=Homo sapiens GN=SNX6 PE=2 SV=1 - [C0H5W9_HUMAN]                                                                       | 10.22  | 9.66  | 4  | 4  | 4   | 0.137 | 0.141 |
| P11166 | Solute carrier family 2, facilitated glucose transporter member 1 OS=Homo sapiens GN=SLC2A1 PE=1 SV=2 - [GTR1_HUMAN]                  | 22.94  | 7.32  | 4  | 4  | 7   | 0.075 | 0.246 |
| Q00796 | Sorbitol dehydrogenase OS=Homo sapiens GN=SORD PE=1 SV=4 - [DHSO_HUMAN]                                                               | 16.25  | 10.08 | 4  | 4  | 6   | 0.151 | 0.387 |
| O60493 | Sorting nexin-3 OS=Homo sapiens GN=SNX3 PE=1 SV=3 - [SNX3_HUMAN]                                                                      | 18.02  | 26.54 | 5  | 5  | 7   | 0.111 | 0.073 |
| P02549 | Spectrin alpha chain, erythrocyte OS=Homo sapiens GN=SPTA1 PE=1 SV=5 - [SPTA1_HUMAN]                                                  | 153.09 | 15.71 | 35 | 36 | 48  | 0.106 | 0.221 |
| P11277 | Spectrin beta chain, erythrocyte OS=Homo sapiens GN=SPTB PE=1 SV=5 - [SPTB1_HUMAN]                                                    | 53.88  | 6.27  | 16 | 17 | 19  | 0.083 | 0.577 |
| P52788 | Spermine synthase OS=Homo sapiens GN=SMS PE=1 SV=2 - [SPSY_HUMAN]                                                                     | 9.72   | 8.74  | 4  | 4  | 4   | 0.152 | 0.154 |
| P26368 | Splicing factor U2AF 65 kDa subunit OS=Homo sapiens GN=U2AF2 PE=1 SV=4 - [U2AF2_HUMAN]                                                | 4.78   | 2.95  | 2  | 2  | 2   | 0.129 | 0.083 |
| B3KUY1 | Splicing factor, arginine/serine-rich 2, isoform CRA_d OS=Homo sapiens GN=SF2 PE=2 SV=1 - [B3KUY1_HUMAN]                              | 5.16   | 7.66  | 2  | 2  | 2   | 0.269 | 0.059 |
| P16949 | Stathmin OS=Homo sapiens GN=STMN1 PE=1 SV=3 - [STMN1_HUMAN]                                                                           | 89.12  | 61.74 | 14 | 14 | 29  | 0.060 | 0.084 |
| Q9H2G2 | STE20-like serine/threonine-protein kinase OS=Homo sapiens GN=SLK PE=1 SV=1 - [SLK_HUMAN]                                             | 5.31   | 1.13  | 2  | 2  | 2   | 0.198 | 0.165 |
| P31948 | Stress-induced-phosphoprotein 1 OS=Homo sapiens GN=STIP1 PE=1 SV=1 - [STIP1_HUMAN]                                                    | 185.22 | 38.86 | 33 | 34 | 62  | 0.295 | 0.220 |
| O95347 | Structural maintenance of chromosomes protein 2 OS=Homo sapiens GN=SMC2 PE=1 SV=2 - [SMC2_HUMAN]                                      | 4.97   | 1.17  | 2  | 2  | 2   | 0.139 | 0.090 |
| P00441 | Superoxide dismutase [Cu-Zn] OS=Homo sapiens GN=SOD1 PE=1 SV=2 - [SODC_HUMAN]                                                         | 248.78 | 49.35 | 11 | 11 | 92  | 0.643 | 0.444 |
| Q9Y220 | Suppressor of G2 allele of SKP1 homolog OS=Homo sapiens GN=SUGT1 PE=1 SV=3 - [SUGT1_HUMAN]                                            | 13.36  | 6.58  | 2  | 2  | 4   | 0.229 | 0.218 |
| O15498 | Synaptobrevin homolog YKT6 OS=Homo sapiens GN=YKT6 PE=1 SV=1 - [YKT6_HUMAN]                                                           | 7.86   | 13.64 | 3  | 3  | 3   | 0.511 | 0.508 |
| P17987 | T-complex protein 1 subunit alpha OS=Homo sapiens GN=TCP1 PE=1 SV=1 - [TCPA_HUMAN]                                                    | 104.78 | 23.38 | 15 | 15 | 35  | 0.157 | 0.166 |
| P78371 | T-complex protein 1 subunit beta OS=Homo sapiens GN=CCT2 PE=1 SV=4 - [TCPB_HUMAN]                                                     | 134.05 | 34.02 | 21 | 21 | 43  | 0.178 | 0.157 |
| P50991 | T-complex protein 1 subunit delta OS=Homo sapiens GN=CCT4 PE=1 SV=4 - [TCPD_HUMAN]                                                    | 129.49 | 34.69 | 20 | 20 | 43  | 0.178 | 0.155 |
| P50990 | T-complex protein 1 subunit theta OS=Homo sapiens GN=CCT8 PE=1 SV=4 - [TCPQ_HUMAN]                                                    | 165.26 | 47.08 | 26 | 26 | 51  | 0.169 | 0.151 |
| P40227 | T-complex protein 1 subunit zeta OS=Homo sapiens GN=CCT6A PE=1 SV=3 - [TCPZ_HUMAN]                                                    | 118.77 | 27.68 | 19 | 19 | 39  | 0.162 | 0.165 |
| Q5TCU6 | Talin 1 OS=Homo sapiens GN=TLN1 PE=2 SV=1 - [Q5TCU6_HUMAN]                                                                            | 307.80 | 23.59 | 65 | 66 | 103 | 0.053 | 0.062 |
| B1AKP7 | TAR DNA binding protein OS=Homo sapiens GN=TARDBP PE=4 SV=1 - [B1AKP7_HUMAN]                                                          | 6.96   | 6.44  | 2  | 2  | 2   | 0.327 | 0.196 |
| A8K8E1 | TBC1 domain family, member 15, isoform CRA_d OS=Homo sapiens GN=TBC1D15 PE=2 SV=1 - [A8K8E1_HUMAN]                                    | 5.83   | 3.60  | 2  | 2  | 2   | 0.221 | 0.196 |
| Q59G71 | Tensin variant (Fragment) OS=Homo sapiens PE=2 SV=1 - [Q59G71_HUMAN]                                                                  | 15.12  | 6.19  | 5  | 5  | 5   | 0.226 | 0.115 |
| Q99614 | Tetratricopeptide repeat protein 1 OS=Homo sapiens GN=TTC1 PE=1 SV=1 - [TTC1_HUMAN]                                                   | 6.27   | 5.82  | 2  | 2  | 2   | 0.078 | 0.086 |
| P52888 | Thimet oligopeptidase OS=Homo sapiens GN=THOP1 PE=1 SV=2 - [THOP1_HUMAN]                                                              | 29.45  | 7.98  | 6  | 6  | 9   | 0.304 | 0.190 |
| B1ALW1 | Thioredoxin OS=Homo sapiens GN=TXN PE=4 SV=1 - [B1ALW1_HUMAN]                                                                         | 69.66  | 36.47 | 3  | 3  | 20  | 0.401 | 0.206 |
| O43396 | Thioredoxin-like protein 1 OS=Homo sapiens GN=TXNL1 PE=1 SV=3 - [TXNL1_HUMAN]                                                         | 33.76  | 18.69 | 5  | 5  | 10  | 0.242 | 0.162 |
| P26639 | Threonyl-tRNA synthetase, cytoplasmic OS=Homo sapiens GN=TARS PE=1 SV=3 - [SYTC_HUMAN]                                                | 27.98  | 8.99  | 7  | 7  | 10  | 0.072 | 0.067 |
| P23919 | Thymidylate kinase OS=Homo sapiens GN=DTYMK PE=1 SV=4 - [KTHY_HUMAN]                                                                  | 9.78   | 6.60  | 2  | 2  | 4   | 0.277 | 0.254 |
| A8MW06 | Thymosin beta-4-like protein 3 OS=Homo sapiens GN=TMSL3 PE=2 SV=1 - [TMSL3_HUMAN]                                                     | 48.21  | 45.45 | 4  | 4  | 17  | 0.024 | 0.019 |

|        |                                                                                                                                  |        |       |    |    |     |       |       |
|--------|----------------------------------------------------------------------------------------------------------------------------------|--------|-------|----|----|-----|-------|-------|
| O75663 | TIP41-like protein OS=Homo sapiens GN=TIPRL PE=1 SV=2 - [TIPRL_HUMAN]                                                            | 14.10  | 13.24 | 4  | 4  | 5   | 0.222 | 0.185 |
| A6NDN0 | Trafficking protein particle complex 3, isoform CRA_a OS=Homo sapiens GN=TRAPPC3 PE=4 SV=1 - [A6NDN0_HUMAN]                      | 5.06   | 11.19 | 2  | 2  | 2   | 0.104 | 0.604 |
| P37837 | Transaldolase OS=Homo sapiens GN=TALDO1 PE=1 SV=2 - [TALDO_HUMAN]                                                                | 161.93 | 44.81 | 19 | 19 | 54  | 0.238 | 0.156 |
| P23193 | Transcription elongation factor A protein 1 OS=Homo sapiens GN=TCEA1 PE=1 SV=2 - [TCEA1_HUMAN]                                   | 20.05  | 14.62 | 4  | 4  | 6   | 0.051 | 0.062 |
| Q13263 | Transcription intermediary factor 1-beta OS=Homo sapiens GN=TRIM28 PE=1 SV=5 - [TIF1B_HUMAN]                                     | 14.37  | 3.11  | 3  | 3  | 6   | 0.240 | 1.201 |
| P02786 | Transferrin receptor protein 1 OS=Homo sapiens GN=TFRC PE=1 SV=2 - [TFR1_HUMAN]                                                  | 23.61  | 7.37  | 6  | 6  | 8   | 0.291 | 0.031 |
| P61586 | Transforming protein RhoA OS=Homo sapiens GN=RHOA PE=1 SV=1 - [RHOA_HUMAN]                                                       | 6.33   | 9.33  | 2  | 2  | 2   | 0.585 | 0.370 |
| P37802 | Transgelin-2 OS=Homo sapiens GN=TAGLN2 PE=1 SV=3 - [TAGL2_HUMAN]                                                                 | 58.47  | 41.71 | 10 | 10 | 17  | 0.172 | 0.148 |
| P55072 | Transitional endoplasmic reticulum ATPase OS=Homo sapiens GN=VCP PE=1 SV=4 - [TERA_HUMAN]                                        | 192.98 | 27.92 | 22 | 22 | 60  | 0.391 | 0.278 |
| P13693 | Translationally-controlled tumor protein OS=Homo sapiens GN=TPT1 PE=1 SV=1 - [TCTP_HUMAN]                                        | 30.04  | 29.65 | 6  | 6  | 10  | 0.173 | 0.183 |
| Q92973 | Transportin-1 OS=Homo sapiens GN=TNPO1 PE=1 SV=2 - [TNPO1_HUMAN]                                                                 | 21.56  | 4.34  | 3  | 3  | 7   | 0.199 | 0.187 |
| P22102 | Trifunctional purine biosynthetic protein adenosine-3 OS=Homo sapiens GN=GART PE=1 SV=1 - [PUR2_HUMAN]                           | 26.03  | 5.94  | 6  | 7  | 9   | 0.173 | 0.079 |
| P60174 | Triosephosphate isomerase OS=Homo sapiens GN=TPI1 PE=1 SV=2 - [TPIS_HUMAN]                                                       | 220.55 | 56.63 | 13 | 13 | 67  | 0.139 | 0.169 |
| Q8NG06 | Tripartite motif-containing protein 58 OS=Homo sapiens GN=TRIM58 PE=2 SV=2 - [TRI58_HUMAN]                                       | 26.03  | 13.79 | 8  | 8  | 9   | 0.145 | 0.100 |
| P29144 | Tripeptidyl-peptidase 2 OS=Homo sapiens GN=TPP2 PE=1 SV=4 - [TPP2_HUMAN]                                                         | 20.50  | 4.08  | 6  | 6  | 7   | 0.460 | 0.357 |
| D9YZV5 | Tropomyosin 1 (Alpha) isoform 4 OS=Homo sapiens GN=TPM1 PE=3 SV=1 - [D9YZV5_HUMAN]                                               | 54.57  | 26.06 | 3  | 10 | 19  | 0.059 | 0.279 |
| D9YZV7 | Tropomyosin 1 (Alpha) isoform 6 OS=Homo sapiens GN=TPM1 PE=3 SV=1 - [D9YZV7_HUMAN]                                               | 73.95  | 31.02 | 2  | 9  | 23  | 0.043 | 0.116 |
| Q5LJ98 | TROVE domain family, member 2 OS=Homo sapiens GN=TROVE2 PE=2 SV=1 - [Q5LJ98_HUMAN]                                               | 17.00  | 4.83  | 3  | 3  | 6   | 0.064 | 0.073 |
| P23381 | Tryptophanyl-tRNA synthetase, cytoplasmic OS=Homo sapiens GN=WARS PE=1 SV=2 - [SYWC_HUMAN]                                       | 38.93  | 13.16 | 7  | 7  | 13  | 0.151 | 0.083 |
| Q9BQE3 | Tubulin alpha-1C chain OS=Homo sapiens GN=TUBA1C PE=1 SV=1 - [TBA1C_HUMAN]                                                       | 108.25 | 22.27 | 3  | 9  | 35  | 0.121 | 0.076 |
| P68371 | Tubulin beta-2C chain OS=Homo sapiens GN=TUBB2C PE=1 SV=1 - [TBB2C_HUMAN]                                                        | 129.74 | 25.84 | 12 | 12 | 45  | 0.119 | 0.083 |
| B1AH89 | Tubulin tyrosine ligase-like family, member 12 OS=Homo sapiens GN=TLL12 PE=4 SV=1 - [B1AH89_HUMAN]                               | 36.59  | 13.21 | 7  | 7  | 11  | 0.170 | 0.175 |
| Q5QJ74 | Tubulin-specific chaperone cofactor E-like protein OS=Homo sapiens GN=TBCEL PE=2 SV=2 - [TBCEL_HUMAN]                            | 9.60   | 8.25  | 3  | 3  | 3   | 0.303 | 0.229 |
| Q15813 | Tubulin-specific chaperone E OS=Homo sapiens GN=TBCE PE=1 SV=1 - [TBCE_HUMAN]                                                    | 7.94   | 4.93  | 3  | 3  | 3   | 0.036 | 0.060 |
| Q06124 | Tyrosine-protein phosphatase non-receptor type 11 OS=Homo sapiens GN=PTPN11 PE=1 SV=2 - [PTN11_HUMAN]                            | 13.78  | 7.20  | 5  | 5  | 5   | 0.342 | 0.298 |
| P54577 | Tyrosyl-tRNA synthetase, cytoplasmic OS=Homo sapiens GN=YARS PE=1 SV=4 - [SYYC_HUMAN]                                            | 91.66  | 29.55 | 19 | 19 | 30  | 0.094 | 0.111 |
| P62312 | U6 snRNA-associated Sm-like protein LSM6 OS=Homo sapiens GN=LSM6 PE=1 SV=1 - [LSM6_HUMAN]                                        | 5.93   | 21.25 | 2  | 2  | 2   | 0.146 | 0.113 |
| Q5TBK7 | Ubiquitin carboxyl-terminal esterase L3 (Ubiquitin thiolesterase) (Fragment) OS=Homo sapiens GN=UCHL3 PE=2 SV=1 - [Q5TBK7_HUMAN] | 7.96   | 5.26  | 2  | 2  | 3   | 0.613 | 0.355 |
| P45974 | Ubiquitin carboxyl-terminal hydrolase 5 OS=Homo sapiens GN=USP5 PE=1 SV=2 - [UBP5_HUMAN]                                         | 63.14  | 9.44  | 9  | 9  | 19  | 0.477 | 0.359 |
| A6NJA2 | Ubiquitin carboxyl-terminal hydrolase OS=Homo sapiens GN=USP14 PE=3 SV=1 - [A6NJA2_HUMAN]                                        | 84.40  | 23.09 | 14 | 14 | 27  | 0.646 | 0.401 |
| E9PCQ3 | Ubiquitin carboxyl-terminal hydrolase OS=Homo sapiens GN=USP15 PE=3 SV=2 - [E9PCQ3_HUMAN]                                        | 60.14  | 12.76 | 14 | 14 | 20  | 0.449 | 0.253 |
| E9PM46 | Ubiquitin carboxyl-terminal hydrolase OS=Homo sapiens GN=USP47 PE=3 SV=1 - [E9PM46_HUMAN]                                        | 7.84   | 2.21  | 3  | 3  | 3   | 0.287 | 0.073 |
| F5GX52 | Ubiquitin carrier protein OS=Homo sapiens PE=3 SV=1 - [F5GX52_HUMAN]                                                             | 32.33  | 21.74 | 3  | 3  | 11  | 0.535 | 0.364 |
| Q5VVQ6 | Ubiquitin thioesterase OTU1 OS=Homo sapiens GN=YOD1 PE=1 SV=1 - [OTU1_HUMAN]                                                     | 44.10  | 16.95 | 8  | 8  | 16  | 0.510 | 0.432 |
| P62979 | Ubiquitin-40S ribosomal protein S27a OS=Homo sapiens GN=RPS27A PE=1 SV=2 - [RS27A_HUMAN]                                         | 402.31 | 41.03 | 9  | 9  | 143 | 0.602 | 0.262 |
| Q9BSL1 | Ubiquitin-associated domain-containing protein 1 OS=Homo sapiens GN=UBAC1 PE=1 SV=1 - [UBAC1_HUMAN]                              | 35.59  | 16.30 | 6  | 6  | 10  | 0.453 | 0.300 |
| P61088 | Ubiquitin-conjugating enzyme E2 N OS=Homo sapiens GN=UBE2N PE=1 SV=1 - [UBE2N_HUMAN]                                             | 55.31  | 36.18 | 7  | 7  | 17  | 0.667 | 0.476 |
| Q9C0C9 | Ubiquitin-conjugating enzyme E2 O OS=Homo sapiens GN=UBE2O PE=1 SV=3 - [UBE2O_HUMAN]                                             | 30.25  | 4.72  | 8  | 8  | 9   | 0.649 | 0.571 |
| Q13404 | Ubiquitin-conjugating enzyme E2 variant 1 OS=Homo sapiens GN=UBE2V1 PE=1 SV=2 - [UB2V1_HUMAN]                                    | 35.58  | 40.82 | 4  | 8  | 13  | 0.340 | 0.298 |
| Q15819 | Ubiquitin-conjugating enzyme E2 variant 2 OS=Homo sapiens GN=UBE2V2 PE=1 SV=4 - [UB2V2_HUMAN]                                    | 24.75  | 36.55 | 3  | 7  | 9   | 0.494 | 0.408 |
| P22314 | Ubiquitin-like modifier-activating enzyme 1 OS=Homo sapiens GN=UBA1 PE=1 SV=3 - [UBA1_HUMAN]                                     | 105.88 | 14.08 | 16 | 16 | 34  | 0.389 | 0.325 |
| A0AVT1 | Ubiquitin-like modifier-activating enzyme 6 OS=Homo sapiens GN=UBA6 PE=1 SV=1 - [UBA6_HUMAN]                                     | 23.37  | 3.61  | 4  | 4  | 7   | 0.127 | 0.108 |
| Q9NT62 | Ubiquitin-like-conjugating enzyme ATG3 OS=Homo sapiens GN=ATG3 PE=1 SV=1 - [ATG3_HUMAN]                                          | 5.60   | 4.14  | 2  | 2  | 2   | 0.268 | 0.188 |
| P30085 | UMP-CMP kinase OS=Homo sapiens GN=CMPK1 PE=1 SV=3 - [KCY_HUMAN]                                                                  | 17.19  | 22.96 | 4  | 4  | 5   | 0.309 | 0.244 |
| Q6ICL3 | Uncharacterized protein C22orf25 OS=Homo sapiens GN=C22orf25 PE=2 SV=1 - [CV025_HUMAN]                                           | 24.51  | 14.13 | 5  | 5  | 9   | 0.445 | 0.392 |
| Q8IXQ3 | Uncharacterized protein C9orf40 OS=Homo sapiens GN=C9orf40 PE=1 SV=1 - [CI040_HUMAN]                                             | 13.85  | 12.89 | 2  | 2  | 5   | 0.616 | 0.477 |
| B4DNR3 | Uncharacterized protein OS=Homo sapiens GN=ABHD14B PE=2 SV=1 - [B4DNR3_HUMAN]                                                    | 19.74  | 21.62 | 4  | 4  | 6   | 0.941 | 0.462 |
| B4DUX0 | Uncharacterized protein OS=Homo sapiens GN=ACOT7 PE=2 SV=1 - [B4DUX0_HUMAN]                                                      | 6.07   | 5.66  | 2  | 2  | 2   | 0.364 | 0.357 |
| F5H0N0 | Uncharacterized protein OS=Homo sapiens GN=ACTG1 PE=3 SV=1 - [F5H0N0_HUMAN]                                                      | 309.25 | 45.95 | 4  | 13 | 104 | 0.053 | 0.060 |
| B4DXP9 | Uncharacterized protein OS=Homo sapiens GN=ACTR1A PE=2 SV=1 - [B4DXP9_HUMAN]                                                     | 53.48  | 11.85 | 5  | 6  | 21  | 0.259 | 0.177 |
| B4DTI0 | Uncharacterized protein OS=Homo sapiens GN=ACTR3 PE=2 SV=1 - [B4DTI0_HUMAN]                                                      | 10.38  | 12.11 | 3  | 3  | 3   | 0.077 | 0.149 |
| B7Z783 | Uncharacterized protein OS=Homo sapiens GN=ADK PE=2 SV=1 - [B7Z783_HUMAN]                                                        | 22.69  | 21.97 | 5  | 5  | 7   | 0.356 | 0.195 |
| E9PEC0 | Uncharacterized protein OS=Homo sapiens GN=ADRM1 PE=4 SV=2 - [E9PEC0_HUMAN]                                                      | 9.30   | 10.73 | 3  | 3  | 3   | 0.148 | 0.062 |
| C9J2I0 | Uncharacterized protein OS=Homo sapiens GN=AGFG1 PE=4 SV=1 - [C9J2I0_HUMAN]                                                      | 8.72   | 7.98  | 2  | 2  | 3   | 0.295 | 0.203 |
| C9JSL3 | Uncharacterized protein OS=Homo sapiens GN=AKR7A2 PE=4 SV=2 - [C9JSL3_HUMAN]                                                     | 17.46  | 7.14  | 2  | 2  | 4   | 0.478 | 0.352 |
| F5H4B6 | Uncharacterized protein OS=Homo sapiens GN=ALDH16A1 PE=4 SV=1 - [F5H4B6_HUMAN]                                                   | 18.48  | 8.92  | 5  | 5  | 6   | 0.866 | 0.387 |

|        |                                                                                |        |       |    |    |    |       |       |
|--------|--------------------------------------------------------------------------------|--------|-------|----|----|----|-------|-------|
| E9PKC5 | Uncharacterized protein OS=Homo sapiens GN=AMPD3 PE=4 SV=1 - [E9PKC5_HUMAN]    | 7.72   | 2.81  | 3  | 3  | 3  | 0.399 | 0.351 |
| E7EVE3 | Uncharacterized protein OS=Homo sapiens GN=ANK1 PE=4 SV=1 - [E7EVE3_HUMAN]     | 44.31  | 4.39  | 10 | 10 | 15 | 0.041 | 0.391 |
| F5H754 | Uncharacterized protein OS=Homo sapiens GN=ANKFY1 PE=4 SV=1 - [F5H754_HUMAN]   | 4.62   | 1.53  | 2  | 2  | 2  | 0.753 | 0.442 |
| B4DT77 | Uncharacterized protein OS=Homo sapiens GN=ANXA7 PE=2 SV=1 - [B4DT77_HUMAN]    | 74.20  | 38.69 | 13 | 13 | 23 | 0.349 | 0.301 |
| F5H0H0 | Uncharacterized protein OS=Homo sapiens GN=AP2M1 PE=4 SV=1 - [F5H0H0_HUMAN]    | 10.91  | 5.24  | 3  | 3  | 4  | 0.334 | 0.149 |
| B7ZB63 | Uncharacterized protein OS=Homo sapiens GN=ARF3 PE=2 SV=1 - [B7ZB63_HUMAN]     | 25.89  | 25.00 | 4  | 4  | 9  | 0.457 | 0.275 |
| E9PNR6 | Uncharacterized protein OS=Homo sapiens GN=ARHGAP1 PE=4 SV=1 - [E9PNR6_HUMAN]  | 6.20   | 10.94 | 2  | 2  | 2  | 0.735 | 0.380 |
| F5H6Q0 | Uncharacterized protein OS=Homo sapiens GN=ARHGDI1 PE=4 SV=1 - [F5H6Q0_HUMAN]  | 23.70  | 59.82 | 6  | 6  | 8  | 0.572 | 0.429 |
| E7EWX4 | Uncharacterized protein OS=Homo sapiens GN=ARPC4 PE=4 SV=1 - [E7EWX4_HUMAN]    | 8.18   | 10.26 | 2  | 2  | 3  | 0.072 | 0.194 |
| E9PBU3 | Uncharacterized protein OS=Homo sapiens GN=ATIC PE=4 SV=1 - [E9PBU3_HUMAN]     | 57.78  | 19.97 | 11 | 11 | 18 | 0.315 | 0.239 |
| B7Z1R5 | Uncharacterized protein OS=Homo sapiens GN=ATP6V1A PE=2 SV=1 - [B7Z1R5_HUMAN]  | 55.45  | 16.27 | 11 | 11 | 17 | 0.153 | 0.142 |
| A8MUN4 | Uncharacterized protein OS=Homo sapiens GN=ATP6V1E1 PE=2 SV=1 - [A8MUN4_HUMAN] | 29.22  | 26.02 | 6  | 6  | 10 | 0.139 | 0.142 |
| E9PGE6 | Uncharacterized protein OS=Homo sapiens GN=ATP6V1H PE=4 SV=1 - [E9PGE6_HUMAN]  | 10.64  | 4.36  | 2  | 2  | 3  | 0.176 | 0.134 |
| C9JB13 | Uncharacterized protein OS=Homo sapiens GN=BSDC1 PE=4 SV=1 - [C9JB13_HUMAN]    | 10.42  | 7.11  | 3  | 3  | 4  | 0.046 | 0.152 |
| E9PL10 | Uncharacterized protein OS=Homo sapiens GN=BTF3L4 PE=4 SV=1 - [E9PL10_HUMAN]   | 25.78  | 26.21 | 6  | 6  | 10 | 0.075 | 0.068 |
| C9JXR7 | Uncharacterized protein OS=Homo sapiens GN=CASP3 PE=4 SV=2 - [C9JXR7_HUMAN]    | 7.67   | 15.38 | 2  | 2  | 3  | 0.201 | 0.093 |
| E9PAQ6 | Uncharacterized protein OS=Homo sapiens GN=CCT3 PE=3 SV=1 - [E9PAQ6_HUMAN]     | 123.45 | 29.04 | 20 | 20 | 40 | 0.190 | 0.170 |
| E7ENZ3 | Uncharacterized protein OS=Homo sapiens GN=CCT5 PE=4 SV=1 - [E7ENZ3_HUMAN]     | 123.71 | 30.66 | 17 | 17 | 40 | 0.215 | 0.202 |
| E9PP50 | Uncharacterized protein OS=Homo sapiens GN=CFL1 PE=4 SV=1 - [E9PP50_HUMAN]     | 95.19  | 50.00 | 10 | 11 | 31 | 0.419 | 0.282 |
| B4DIN1 | Uncharacterized protein OS=Homo sapiens GN=CLTA PE=2 SV=1 - [B4DIN1_HUMAN]     | 27.96  | 13.48 | 5  | 5  | 9  | 0.143 | 0.099 |
| B4DIH5 | Uncharacterized protein OS=Homo sapiens GN=COPS2 PE=2 SV=1 - [B4DIH5_HUMAN]    | 6.14   | 3.96  | 2  | 2  | 2  | 0.669 | 0.355 |
| B4DM67 | Uncharacterized protein OS=Homo sapiens GN=CSE1L PE=2 SV=1 - [B4DM67_HUMAN]    | 5.86   | 2.84  | 2  | 2  | 2  | 0.493 | 0.170 |
| F5GWW0 | Uncharacterized protein OS=Homo sapiens GN=CTSB PE=3 SV=1 - [F5GWW0_HUMAN]     | 7.94   | 9.89  | 3  | 3  | 3  | 0.098 | 0.095 |
| E7EWR0 | Uncharacterized protein OS=Homo sapiens GN=CUL1 PE=3 SV=1 - [E7EWR0_HUMAN]     | 8.89   | 3.41  | 3  | 3  | 3  | 0.624 | 0.384 |
| A8MSH7 | Uncharacterized protein OS=Homo sapiens GN=CUL4A PE=3 SV=1 - [A8MSH7_HUMAN]    | 26.33  | 9.88  | 8  | 8  | 9  | 0.383 | 0.276 |
| F2Z305 | Uncharacterized protein OS=Homo sapiens GN=DCAF6 PE=4 SV=1 - [F2Z305_HUMAN]    | 5.60   | 3.60  | 2  | 2  | 2  | 0.239 | 0.364 |
| E9PFS5 | Uncharacterized protein OS=Homo sapiens GN=DCTN1 PE=4 SV=1 - [E9PFS5_HUMAN]    | 39.34  | 7.85  | 11 | 11 | 14 | 0.252 | 0.160 |
| F5H223 | Uncharacterized protein OS=Homo sapiens GN=DCTN2 PE=4 SV=1 - [F5H223_HUMAN]    | 24.49  | 12.70 | 6  | 6  | 8  | 0.266 | 0.157 |
| C9J8R4 | Uncharacterized protein OS=Homo sapiens GN=DCUN1D1 PE=4 SV=1 - [C9J8R4_HUMAN]  | 9.89   | 12.50 | 2  | 2  | 3  | 0.350 | 0.295 |
| E9PML7 | Uncharacterized protein OS=Homo sapiens GN=DERA PE=4 SV=1 - [E9PML7_HUMAN]     | 6.35   | 6.78  | 2  | 2  | 2  | 0.819 | 0.381 |
| F5H6K0 | Uncharacterized protein OS=Homo sapiens GN=DHX15 PE=4 SV=1 - [F5H6K0_HUMAN]    | 4.92   | 0.89  | 2  | 2  | 2  | 0.061 | 0.125 |
| E7ERW8 | Uncharacterized protein OS=Homo sapiens GN=DIAPH1 PE=4 SV=1 - [E7ERW8_HUMAN]   | 45.04  | 6.01  | 10 | 10 | 16 | 0.328 | 0.232 |
| C9JXB9 | Uncharacterized protein OS=Homo sapiens GN=DNAJB2 PE=4 SV=1 - [C9JXB9_HUMAN]   | 8.75   | 12.70 | 3  | 3  | 3  | 1.355 | 0.679 |
| E7EPX3 | Uncharacterized protein OS=Homo sapiens GN=DNPEP PE=3 SV=1 - [E7EPX3_HUMAN]    | 13.80  | 8.48  | 3  | 3  | 4  | 0.524 | 0.308 |
| F5GXD5 | Uncharacterized protein OS=Homo sapiens GN=DPP3 PE=4 SV=1 - [F5GXD5_HUMAN]     | 36.97  | 10.55 | 7  | 7  | 12 | 0.472 | 0.400 |
| B4DR31 | Uncharacterized protein OS=Homo sapiens GN=DPYSL2 PE=2 SV=1 - [B4DR31_HUMAN]   | 13.87  | 4.66  | 3  | 3  | 5  | 0.175 | 0.320 |
| F5H335 | Uncharacterized protein OS=Homo sapiens GN=EIF3A PE=4 SV=1 - [F5H335_HUMAN]    | 42.40  | 10.83 | 13 | 13 | 15 | 0.169 | 0.106 |
| B4DV79 | Uncharacterized protein OS=Homo sapiens GN=EIF3B PE=2 SV=1 - [B4DV79_HUMAN]    | 23.20  | 6.64  | 5  | 5  | 8  | 0.056 | 0.030 |
| F5H1I1 | Uncharacterized protein OS=Homo sapiens GN=EIF3C PE=4 SV=1 - [F5H1I1_HUMAN]    | 13.43  | 5.23  | 4  | 4  | 4  | 0.047 | 0.033 |
| B7ZAM9 | Uncharacterized protein OS=Homo sapiens GN=EIF3K PE=2 SV=1 - [B7ZAM9_HUMAN]    | 5.74   | 9.95  | 2  | 2  | 2  | 0.413 | 0.112 |
| E7EQG2 | Uncharacterized protein OS=Homo sapiens GN=EIF4A2 PE=3 SV=1 - [E7EQG2_HUMAN]   | 47.01  | 24.31 | 2  | 8  | 13 | 0.321 | 0.542 |
| E7EPC9 | Uncharacterized protein OS=Homo sapiens GN=EIF4B PE=4 SV=1 - [E7EPC9_HUMAN]    | 56.50  | 20.44 | 12 | 12 | 19 | 0.352 | 0.271 |
| E7EX73 | Uncharacterized protein OS=Homo sapiens GN=EIF4G1 PE=4 SV=1 - [E7EX73_HUMAN]   | 33.39  | 6.82  | 11 | 11 | 11 | 0.165 | 0.134 |
| D6RA00 | Uncharacterized protein OS=Homo sapiens GN=ENOPH1 PE=4 SV=1 - [D6RA00_HUMAN]   | 10.13  | 7.51  | 2  | 2  | 4  | 0.189 | 0.191 |
| E9PEX0 | Uncharacterized protein OS=Homo sapiens GN=EPB41 PE=4 SV=1 - [E9PEX0_HUMAN]    | 20.81  | 9.66  | 5  | 7  | 7  | 0.143 | 0.614 |
| E5RJ56 | Uncharacterized protein OS=Homo sapiens GN=EPB49 PE=4 SV=1 - [E5RJ56_HUMAN]    | 28.92  | 15.03 | 5  | 5  | 9  | 0.081 | 0.095 |
| E7EQR4 | Uncharacterized protein OS=Homo sapiens GN=EZR PE=4 SV=2 - [E7EQR4_HUMAN]      | 76.62  | 25.99 | 15 | 20 | 25 | 0.089 | 0.169 |
| E9PCI9 | Uncharacterized protein OS=Homo sapiens GN=FDPS PE=3 SV=1 - [E9PCI9_HUMAN]     | 18.29  | 14.73 | 5  | 5  | 6  | 0.272 | 0.162 |
| B7Z7Z8 | Uncharacterized protein OS=Homo sapiens GN=FKBP5 PE=2 SV=1 - [B7Z7Z8_HUMAN]    | 19.62  | 17.27 | 4  | 5  | 6  | 0.110 | 0.041 |
| B3KNR9 | Uncharacterized protein OS=Homo sapiens GN=FN3K PE=2 SV=1 - [B3KNR9_HUMAN]     | 13.82  | 16.95 | 3  | 3  | 4  | 0.588 | 0.481 |
| B4E0X8 | Uncharacterized protein OS=Homo sapiens GN=FUBP1 PE=2 SV=1 - [B4E0X8_HUMAN]    | 8.40   | 4.45  | 2  | 3  | 3  | 0.067 | 0.067 |
| E9PGM4 | Uncharacterized protein OS=Homo sapiens GN=GBE1 PE=4 SV=1 - [E9PGM4_HUMAN]     | 7.49   | 4.08  | 2  | 2  | 2  | 0.210 | 0.162 |
| B4E192 | Uncharacterized protein OS=Homo sapiens GN=GFAP PE=2 SV=1 - [B4E192_HUMAN]     | 37.91  | 21.87 | 8  | 9  | 13 | 0.581 | 1.753 |
| B8ZZK2 | Uncharacterized protein OS=Homo sapiens GN=GGCT PE=4 SV=1 - [B8ZZK2_HUMAN]     | 22.91  | 12.05 | 2  | 2  | 8  | 0.523 | 0.377 |
| E7EMY5 | Uncharacterized protein OS=Homo sapiens GN=GLOD4 PE=4 SV=1 - [E7EMY5_HUMAN]    | 42.38  | 16.37 | 9  | 9  | 14 | 0.469 | 0.341 |
| C9JAH0 | Uncharacterized protein OS=Homo sapiens GN=GMPPA PE=4 SV=1 - [C9JAH0_HUMAN]    | 5.76   | 7.23  | 2  | 2  | 2  | 0.308 | 0.329 |

|        |                                                                                |       |       |    |    |    |       |       |
|--------|--------------------------------------------------------------------------------|-------|-------|----|----|----|-------|-------|
| B4DUT7 | Uncharacterized protein OS=Homo sapiens GN=GMPS PE=2 SV=1 - [B4DUT7_HUMAN]     | 8.69  | 4.52  | 3  | 3  | 3  | 0.226 | 0.126 |
| E9PDI1 | Uncharacterized protein OS=Homo sapiens GN=GPCPD1 PE=4 SV=1 - [E9PDI1_HUMAN]   | 6.41  | 7.61  | 2  | 2  | 2  | 0.063 | 0.035 |
| F5H8M4 | Uncharacterized protein OS=Homo sapiens GN=GSN PE=4 SV=1 - [F5H8M4_HUMAN]      | 7.93  | 2.41  | 2  | 2  | 3  | 0.344 | 0.268 |
| E7EQZ3 | Uncharacterized protein OS=Homo sapiens GN=GSPT1 PE=4 SV=1 - [E7EQZ3_HUMAN]    | 54.56 | 16.67 | 13 | 13 | 19 | 0.115 | 0.133 |
| A8MX94 | Uncharacterized protein OS=Homo sapiens GN=GSTP1 PE=3 SV=1 - [A8MX94_HUMAN]    | 15.41 | 16.09 | 3  | 3  | 5  | 0.349 | 0.420 |
| F5GZ06 | Uncharacterized protein OS=Homo sapiens GN=HEATR7B2 PE=4 SV=1 - [F5GZ06_HUMAN] | 5.17  | 2.54  | 2  | 2  | 2  | 0.469 | 0.311 |
| F5H5Y5 | Uncharacterized protein OS=Homo sapiens GN=HGS PE=4 SV=1 - [F5H5Y5_HUMAN]      | 16.67 | 6.05  | 5  | 5  | 6  | 0.381 | 0.140 |
| E9PCK0 | Uncharacterized protein OS=Homo sapiens GN=HK1 PE=3 SV=1 - [E9PCK0_HUMAN]      | 28.70 | 5.97  | 6  | 6  | 9  | 0.108 | 0.121 |
| F5H345 | Uncharacterized protein OS=Homo sapiens GN=HMBS PE=4 SV=1 - [F5H345_HUMAN]     | 89.60 | 25.76 | 9  | 9  | 30 | 0.132 | 0.157 |
| B8ZZT7 | Uncharacterized protein OS=Homo sapiens GN=HN1 PE=4 SV=1 - [B8ZZT7_HUMAN]      | 6.67  | 14.02 | 2  | 2  | 2  | 0.166 | 0.513 |
| D6R9P3 | Uncharacterized protein OS=Homo sapiens GN=HNRNPAB PE=4 SV=1 - [D6R9P3_HUMAN]  | 16.60 | 11.07 | 2  | 4  | 6  | 0.228 | 0.125 |
| B4DTC3 | Uncharacterized protein OS=Homo sapiens GN=HNRNPD PE=2 SV=1 - [B4DTC3_HUMAN]   | 21.23 | 13.20 | 3  | 5  | 8  | 0.162 | 0.044 |
| B4DKS8 | Uncharacterized protein OS=Homo sapiens GN=HNRNPF PE=2 SV=1 - [B4DKS8_HUMAN]   | 7.41  | 7.40  | 2  | 3  | 3  | 0.117 | 0.234 |
| B4DPK8 | Uncharacterized protein OS=Homo sapiens GN=HNRNPL PE=2 SV=1 - [B4DPK8_HUMAN]   | 8.69  | 13.75 | 3  | 3  | 3  | 0.091 | 0.038 |
| B3KX72 | Uncharacterized protein OS=Homo sapiens GN=HNRNPU PE=2 SV=1 - [B3KX72_HUMAN]   | 7.49  | 3.20  | 3  | 3  | 3  | 0.036 | 0.044 |
| E9PDE8 | Uncharacterized protein OS=Homo sapiens GN=HSPA4L PE=3 SV=1 - [E9PDE8_HUMAN]   | 7.60  | 2.71  | 2  | 3  | 3  | 0.059 | 0.086 |
| B4DL87 | Uncharacterized protein OS=Homo sapiens GN=HSPB1 PE=2 SV=1 - [B4DL87_HUMAN]    | 41.92 | 37.06 | 7  | 7  | 12 | 0.132 | 0.106 |
| E9PD66 | Uncharacterized protein OS=Homo sapiens GN=HUWE1 PE=4 SV=1 - [E9PD66_HUMAN]    | 56.51 | 3.19  | 16 | 16 | 19 | 0.283 | 0.129 |
| B4E0R6 | Uncharacterized protein OS=Homo sapiens GN=IPO5 PE=2 SV=1 - [B4E0R6_HUMAN]     | 36.78 | 7.51  | 7  | 7  | 12 | 0.331 | 0.272 |
| E7EP96 | Uncharacterized protein OS=Homo sapiens GN=KHSRP PE=4 SV=1 - [E7EP96_HUMAN]    | 7.46  | 6.59  | 2  | 3  | 3  | 0.023 | 0.034 |
| F5H4G7 | Uncharacterized protein OS=Homo sapiens GN=KPNA6 PE=4 SV=1 - [F5H4G7_HUMAN]    | 12.89 | 4.88  | 3  | 4  | 5  | 0.340 | 0.252 |
| B4DJ10 | Uncharacterized protein OS=Homo sapiens GN=LARS PE=2 SV=1 - [B4DJ10_HUMAN]     | 5.36  | 1.34  | 2  | 2  | 2  | 0.122 | 0.049 |
| A8MUU4 | Uncharacterized protein OS=Homo sapiens GN=MBP PE=4 SV=2 - [A8MUU4_HUMAN]      | 12.60 | 15.03 | 3  | 3  | 4  | 0.617 | 1.497 |
| E9PGF9 | Uncharacterized protein OS=Homo sapiens GN=MGEA5 PE=4 SV=1 - [E9PGF9_HUMAN]    | 13.45 | 3.48  | 3  | 4  | 5  | 0.030 | 0.037 |
| A8MU28 | Uncharacterized protein OS=Homo sapiens GN=NAE1 PE=4 SV=1 - [A8MU28_HUMAN]     | 9.96  | 4.72  | 3  | 3  | 3  | 0.322 | 0.332 |
| C9JZI7 | Uncharacterized protein OS=Homo sapiens GN=NAP1L4 PE=3 SV=1 - [C9JZI7_HUMAN]   | 32.06 | 17.99 | 5  | 6  | 11 | 0.238 | 0.209 |
| B7Z463 | Uncharacterized protein OS=Homo sapiens GN=NPEPPS PE=2 SV=1 - [B7Z463_HUMAN]   | 24.09 | 7.27  | 7  | 7  | 8  | 0.497 | 0.253 |
| B9A035 | Uncharacterized protein OS=Homo sapiens GN=NT5C3 PE=4 SV=1 - [B9A035_HUMAN]    | 10.81 | 12.68 | 3  | 3  | 4  | 0.196 | 0.145 |
| E5RFP0 | Uncharacterized protein OS=Homo sapiens GN=NUDCD2 PE=4 SV=1 - [E5RFP0_HUMAN]   | 5.56  | 15.15 | 2  | 2  | 2  | 0.387 | 0.281 |
| F5GYN4 | Uncharacterized protein OS=Homo sapiens GN=OTUB1 PE=4 SV=1 - [F5GYN4_HUMAN]    | 14.87 | 19.09 | 4  | 4  | 5  | 0.196 | 0.218 |
| B4DUA5 | Uncharacterized protein OS=Homo sapiens GN=P4HB PE=2 SV=1 - [B4DUA5_HUMAN]     | 5.89  | 3.54  | 2  | 2  | 2  | 0.115 | 0.097 |
| E7EQV3 | Uncharacterized protein OS=Homo sapiens GN=PABPC1 PE=4 SV=1 - [E7EQV3_HUMAN]   | 13.06 | 4.06  | 3  | 3  | 4  | 0.185 | 0.101 |
| E9PBS1 | Uncharacterized protein OS=Homo sapiens GN=PAICS PE=4 SV=1 - [E9PBS1_HUMAN]    | 89.96 | 22.52 | 12 | 12 | 30 | 0.154 | 0.149 |
| E9PHT6 | Uncharacterized protein OS=Homo sapiens GN=PANK4 PE=4 SV=1 - [E9PHT6_HUMAN]    | 5.05  | 2.72  | 2  | 2  | 2  | 0.124 | 0.065 |
| F2Z2Y4 | Uncharacterized protein OS=Homo sapiens GN=PDXK PE=4 SV=1 - [F2Z2Y4_HUMAN]     | 24.71 | 12.13 | 4  | 4  | 8  | 0.077 | 0.142 |
| E9PCE8 | Uncharacterized protein OS=Homo sapiens GN=PEPD PE=3 SV=1 - [E9PCE8_HUMAN]     | 34.19 | 19.11 | 7  | 7  | 10 | 0.343 | 0.291 |
| F5GWE5 | Uncharacterized protein OS=Homo sapiens GN=PITPNA PE=4 SV=1 - [F5GWE5_HUMAN]   | 30.22 | 24.07 | 7  | 9  | 11 | 0.652 | 0.445 |
| E5RIM3 | Uncharacterized protein OS=Homo sapiens GN=PLAA PE=4 SV=1 - [E5RIM3_HUMAN]     | 7.87  | 2.79  | 2  | 2  | 3  | 0.213 | 0.143 |
| B4E0V0 | Uncharacterized protein OS=Homo sapiens GN=PNPO PE=2 SV=1 - [B4E0V0_HUMAN]     | 5.00  | 9.04  | 2  | 2  | 2  | 0.137 | 0.198 |
| D6RFZ8 | Uncharacterized protein OS=Homo sapiens GN=PIP5K2 PE=4 SV=1 - [D6RFZ8_HUMAN]   | 5.58  | 1.76  | 2  | 2  | 2  | 0.078 | 0.135 |
| E7EPA1 | Uncharacterized protein OS=Homo sapiens GN=PRPSAP2 PE=4 SV=1 - [E7EPA1_HUMAN]  | 19.02 | 13.81 | 4  | 5  | 6  | 0.512 | 0.440 |
| F5GX11 | Uncharacterized protein OS=Homo sapiens GN=PSMA1 PE=4 SV=1 - [F5GX11_HUMAN]    | 53.74 | 34.87 | 11 | 11 | 17 | 0.519 | 0.306 |
| F5GZ16 | Uncharacterized protein OS=Homo sapiens GN=PSMD2 PE=4 SV=1 - [F5GZ16_HUMAN]    | 41.60 | 12.78 | 10 | 10 | 13 | 0.506 | 0.181 |
| F5H8K4 | Uncharacterized protein OS=Homo sapiens GN=PSMD3 PE=4 SV=1 - [F5H8K4_HUMAN]    | 56.41 | 18.81 | 10 | 10 | 18 | 0.281 | 0.142 |
| E9PHI9 | Uncharacterized protein OS=Homo sapiens GN=PSMD6 PE=4 SV=1 - [E9PHI9_HUMAN]    | 21.70 | 11.43 | 5  | 5  | 7  | 0.299 | 0.148 |
| B4DXI8 | Uncharacterized protein OS=Homo sapiens GN=PSMD7 PE=2 SV=1 - [B4DXI8_HUMAN]    | 22.40 | 12.96 | 4  | 4  | 7  | 0.291 | 0.166 |
| B8ZZQ6 | Uncharacterized protein OS=Homo sapiens GN=PTMA PE=4 SV=1 - [B8ZZQ6_HUMAN]     | 29.47 | 23.36 | 4  | 4  | 9  | 0.015 | 0.032 |
| B4DNN3 | Uncharacterized protein OS=Homo sapiens GN=QARS PE=2 SV=1 - [B4DNN3_HUMAN]     | 12.70 | 5.10  | 4  | 4  | 4  | 0.142 | 0.108 |
| C9J7D1 | Uncharacterized protein OS=Homo sapiens GN=RAB7A PE=4 SV=1 - [C9J7D1_HUMAN]    | 4.85  | 14.29 | 2  | 2  | 2  | 0.225 | 0.158 |
| B4DW94 | Uncharacterized protein OS=Homo sapiens GN=RAP1B PE=2 SV=1 - [B4DW94_HUMAN]    | 5.64  | 13.14 | 2  | 2  | 2  | 0.544 | 0.432 |
| F5H3T8 | Uncharacterized protein OS=Homo sapiens GN=RARS PE=4 SV=1 - [F5H3T8_HUMAN]     | 5.57  | 3.52  | 2  | 2  | 2  | 0.242 | 0.123 |
| E9PC52 | Uncharacterized protein OS=Homo sapiens GN=RBBP7 PE=4 SV=1 - [E9PC52_HUMAN]    | 6.29  | 4.57  | 2  | 2  | 2  | 0.142 | 0.121 |
| F5GX07 | Uncharacterized protein OS=Homo sapiens GN=REXO2 PE=4 SV=1 - [F5GX07_HUMAN]    | 6.02  | 12.24 | 2  | 2  | 2  | 0.505 | 0.257 |
| D6RJG8 | Uncharacterized protein OS=Homo sapiens GN=RFESD PE=4 SV=1 - [D6RJG8_HUMAN]    | 16.27 | 50.00 | 4  | 4  | 5  | 0.401 | 0.451 |
| E5RIT6 | Uncharacterized protein OS=Homo sapiens GN=RPL26L1 PE=3 SV=1 - [E5RIT6_HUMAN]  | 5.09  | 10.94 | 2  | 2  | 2  | 0.221 | 0.112 |
| F2Z3A5 | Uncharacterized protein OS=Homo sapiens GN=RPL3 PE=3 SV=1 - [F2Z3A5_HUMAN]     | 7.85  | 6.50  | 3  | 3  | 3  | 0.187 | 0.081 |

|        |                                                                                                           |        |       |    |    |    |       |       |
|--------|-----------------------------------------------------------------------------------------------------------|--------|-------|----|----|----|-------|-------|
| B8ZZK4 | Uncharacterized protein OS=Homo sapiens GN=RPL31 PE=4 SV=1 - [B8ZZK4_HUMAN]                               | 5.34   | 20.25 | 2  | 2  | 2  | 0.113 | 0.079 |
| E7EWF1 | Uncharacterized protein OS=Homo sapiens GN=RPL4 PE=4 SV=1 - [E7EWF1_HUMAN]                                | 19.85  | 10.10 | 6  | 6  | 7  | 0.229 | 0.104 |
| E9PKZ0 | Uncharacterized protein OS=Homo sapiens GN=RPL8 PE=4 SV=1 - [E9PKZ0_HUMAN]                                | 8.72   | 16.10 | 3  | 3  | 3  | 0.094 | 0.064 |
| E9PS50 | Uncharacterized protein OS=Homo sapiens GN=RPS13 PE=4 SV=1 - [E9PS50_HUMAN]                               | 11.42  | 22.41 | 3  | 3  | 4  | 0.042 | 0.053 |
| E5RH77 | Uncharacterized protein OS=Homo sapiens GN=RPS14 PE=4 SV=1 - [E5RH77_HUMAN]                               | 8.04   | 9.70  | 2  | 2  | 3  | 0.158 | 0.135 |
| E9PM36 | Uncharacterized protein OS=Homo sapiens GN=RPS2 PE=3 SV=1 - [E9PM36_HUMAN]                                | 10.90  | 8.13  | 2  | 2  | 4  | 0.077 | 0.057 |
| C9J9K3 | Uncharacterized protein OS=Homo sapiens GN=RPSA PE=3 SV=1 - [C9J9K3_HUMAN]                                | 23.84  | 21.21 | 5  | 5  | 7  | 0.123 | 0.163 |
| E5RJE3 | Uncharacterized protein OS=Homo sapiens GN=RWDD1 PE=4 SV=1 - [E5RJE3_HUMAN]                               | 6.23   | 17.65 | 2  | 2  | 2  | 0.329 | 0.267 |
| B4DNE4 | Uncharacterized protein OS=Homo sapiens GN=SEPT7 PE=2 SV=1 - [B4DNE4_HUMAN]                               | 10.92  | 5.76  | 3  | 3  | 4  | 0.117 | 0.247 |
| B4E3A8 | Uncharacterized protein OS=Homo sapiens GN=SERPINB1 PE=2 SV=1 - [B4E3A8_HUMAN]                            | 14.26  | 9.97  | 4  | 4  | 5  | 0.540 | 0.273 |
| E7EMJ6 | Uncharacterized protein OS=Homo sapiens GN=SGTA PE=4 SV=1 - [E7EMJ6_HUMAN]                                | 29.61  | 13.40 | 5  | 5  | 10 | 0.262 | 0.198 |
| E5RJR5 | Uncharacterized protein OS=Homo sapiens GN=SKP1 PE=4 SV=1 - [E5RJR5_HUMAN]                                | 43.83  | 34.36 | 7  | 7  | 13 | 0.696 | 0.413 |
| E7EPV7 | Uncharacterized protein OS=Homo sapiens GN=SNCA PE=4 SV=1 - [E7EPV7_HUMAN]                                | 201.14 | 78.26 | 10 | 11 | 52 | 0.684 | 0.671 |
| E7ESM6 | Uncharacterized protein OS=Homo sapiens GN=SNDD1 PE=4 SV=2 - [E7ESM6_HUMAN]                               | 28.88  | 6.33  | 6  | 6  | 9  | 0.017 | 0.051 |
| B4DEK4 | Uncharacterized protein OS=Homo sapiens GN=SNX2 PE=2 SV=1 - [B4DEK4_HUMAN]                                | 17.13  | 7.46  | 3  | 3  | 6  | 0.188 | 0.162 |
| E9PBC7 | Uncharacterized protein OS=Homo sapiens GN=SNX5 PE=4 SV=1 - [E9PBC7_HUMAN]                                | 6.01   | 5.45  | 2  | 2  | 2  | 0.135 | 0.137 |
| C9J0K6 | Uncharacterized protein OS=Homo sapiens GN=SRI PE=4 SV=1 - [C9J0K6_HUMAN]                                 | 46.76  | 43.23 | 7  | 7  | 16 | 0.351 | 0.274 |
| E7ETK6 | Uncharacterized protein OS=Homo sapiens GN=SRP68 PE=4 SV=1 - [E7ETK6_HUMAN]                               | 6.11   | 4.36  | 2  | 2  | 2  | 0.049 | 0.043 |
| B4E2V5 | Uncharacterized protein OS=Homo sapiens GN=STOM PE=2 SV=1 - [B4E2V5_HUMAN]                                | 12.50  | 12.24 | 3  | 3  | 4  | 0.056 | 0.470 |
| F2Z3D0 | Uncharacterized protein OS=Homo sapiens GN=SUMO2 PE=4 SV=1 - [F2Z3D0_HUMAN]                               | 6.98   | 30.99 | 2  | 2  | 2  | 0.355 | 0.223 |
| F5GWQ7 | Uncharacterized protein OS=Homo sapiens GN=TAF15 PE=4 SV=1 - [F5GWQ7_HUMAN]                               | 5.68   | 11.65 | 2  | 2  | 2  | 0.247 | 0.069 |
| E5RIW3 | Uncharacterized protein OS=Homo sapiens GN=TBCA PE=4 SV=1 - [E5RIW3_HUMAN]                                | 45.58  | 50.00 | 6  | 6  | 14 | 0.272 | 0.291 |
| A8MVD5 | Uncharacterized protein OS=Homo sapiens GN=TBCB PE=4 SV=1 - [A8MVD5_HUMAN]                                | 6.06   | 9.81  | 2  | 2  | 2  | 0.396 | 0.266 |
| C9JJP5 | Uncharacterized protein OS=Homo sapiens GN=TFG PE=4 SV=1 - [C9JJP5_HUMAN]                                 | 11.08  | 8.29  | 2  | 2  | 4  | 0.371 | 0.101 |
| B4DIT7 | Uncharacterized protein OS=Homo sapiens GN=TGM2 PE=2 SV=1 - [B4DIT7_HUMAN]                                | 165.54 | 29.21 | 20 | 20 | 55 | 0.375 | 0.338 |
| E9PGT1 | Uncharacterized protein OS=Homo sapiens GN=TSN PE=4 SV=1 - [E9PGT1_HUMAN]                                 | 25.23  | 23.77 | 5  | 6  | 8  | 0.523 | 0.286 |
| A6NKB1 | Uncharacterized protein OS=Homo sapiens GN=TTN PE=4 SV=4 - [A6NKB1_HUMAN]                                 | 27.19  | 0.27  | 3  | 9  | 11 | 0.865 | 0.631 |
| E9PIR7 | Uncharacterized protein OS=Homo sapiens GN=TXNRD1 PE=3 SV=1 - [E9PIR7_HUMAN]                              | 39.02  | 12.24 | 7  | 7  | 12 | 0.292 | 0.214 |
| E7EWE1 | Uncharacterized protein OS=Homo sapiens GN=UBA5 PE=4 SV=1 - [E7EWE1_HUMAN]                                | 8.90   | 6.34  | 3  | 3  | 3  | 0.521 | 0.308 |
| D6RDM7 | Uncharacterized protein OS=Homo sapiens GN=UBE2K PE=4 SV=1 - [D6RDM7_HUMAN]                               | 12.40  | 14.63 | 2  | 2  | 4  | 0.267 | 0.282 |
| E9PJ81 | Uncharacterized protein OS=Homo sapiens GN=UBXN1 PE=4 SV=1 - [E9PJ81_HUMAN]                               | 8.60   | 7.24  | 3  | 3  | 3  | 0.190 | 0.172 |
| A6NJ11 | Uncharacterized protein OS=Homo sapiens GN=UFD1L PE=4 SV=1 - [A6NJ11_HUMAN]                               | 9.29   | 11.82 | 2  | 3  | 3  | 0.045 | 0.123 |
| C9JKD6 | Uncharacterized protein OS=Homo sapiens GN=UGP2 PE=4 SV=1 - [C9JKD6_HUMAN]                                | 18.59  | 11.02 | 6  | 6  | 6  | 0.471 | 0.247 |
| E9PG85 | Uncharacterized protein OS=Homo sapiens GN=UROS PE=4 SV=1 - [E9PG85_HUMAN]                                | 28.83  | 29.11 | 6  | 6  | 10 | 0.143 | 0.122 |
| B7Z7T5 | Uncharacterized protein OS=Homo sapiens GN=USP7 PE=2 SV=1 - [B7Z7T5_HUMAN]                                | 14.39  | 6.88  | 5  | 5  | 5  | 0.250 | 0.198 |
| B0V043 | Uncharacterized protein OS=Homo sapiens GN=VAR5 PE=3 SV=1 - [B0V043_HUMAN]                                | 6.73   | 1.66  | 2  | 2  | 2  | 0.095 | 0.106 |
| F5H2A7 | Uncharacterized protein OS=Homo sapiens GN=VBP1 PE=4 SV=1 - [F5H2A7_HUMAN]                                | 16.32  | 15.10 | 3  | 3  | 5  | 0.147 | 0.217 |
| A6NG10 | Uncharacterized protein OS=Homo sapiens GN=WBP2 PE=2 SV=2 - [A6NG10_HUMAN]                                | 61.77  | 23.85 | 7  | 7  | 20 | 0.412 | 0.345 |
| B4DP38 | Uncharacterized protein OS=Homo sapiens GN=WDR77 PE=2 SV=1 - [B4DP38_HUMAN]                               | 6.65   | 4.68  | 2  | 2  | 2  | 0.396 | 0.286 |
| F5GWT4 | Uncharacterized protein OS=Homo sapiens GN=WNK1 PE=4 SV=1 - [F5GWT4_HUMAN]                                | 25.02  | 4.08  | 9  | 9  | 9  | 0.330 | 0.220 |
| Q5T6H7 | Uncharacterized protein OS=Homo sapiens GN=XPNPEP1 PE=2 SV=1 - [Q5T6H7_HUMAN]                             | 24.46  | 6.34  | 4  | 4  | 8  | 0.154 | 0.121 |
| E7ESC6 | Uncharacterized protein OS=Homo sapiens GN=XPO7 PE=4 SV=1 - [E7ESC6_HUMAN]                                | 96.16  | 15.44 | 18 | 18 | 32 | 0.199 | 0.115 |
| E9PQI5 | Uncharacterized protein OS=Homo sapiens PE=4 SV=1 - [E9PQI5_HUMAN]                                        | 19.05  | 17.47 | 3  | 3  | 5  | 0.258 | 0.309 |
| Q9H7C9 | UPF0366 protein C11orf67 OS=Homo sapiens GN=C11orf67 PE=1 SV=1 - [CK067_HUMAN]                            | 5.93   | 18.85 | 2  | 2  | 2  | 0.516 | 0.343 |
| Q5T6V5 | UPF0553 protein C9orf64 OS=Homo sapiens GN=C9orf64 PE=1 SV=1 - [CI064_HUMAN]                              | 8.48   | 4.40  | 2  | 2  | 3  | 0.290 | 0.233 |
| Q9NWW4 | UPF0587 protein C1orf123 OS=Homo sapiens GN=C1orf123 PE=1 SV=1 - [CA123_HUMAN]                            | 14.04  | 23.75 | 4  | 4  | 5  | 0.602 | 0.437 |
| P06132 | Uroporphyrinogen decarboxylase OS=Homo sapiens GN=UROD PE=1 SV=2 - [DCUP_HUMAN]                           | 43.35  | 19.35 | 7  | 7  | 15 | 0.284 | 0.185 |
| P54725 | UV excision repair protein RAD23 homolog A OS=Homo sapiens GN=RAD23A PE=1 SV=1 - [RD23A_HUMAN]            | 61.61  | 23.97 | 5  | 8  | 19 | 0.656 | 0.470 |
| P54727 | UV excision repair protein RAD23 homolog B OS=Homo sapiens GN=RAD23B PE=1 SV=1 - [RD23B_HUMAN]            | 44.91  | 15.16 | 5  | 8  | 14 | 0.241 | 0.204 |
| P21281 | V-type proton ATPase subunit B, brain isoform OS=Homo sapiens GN=ATP6V1B2 PE=1 SV=3 - [VATB2_HUMAN]       | 36.27  | 16.24 | 9  | 9  | 12 | 0.141 | 0.125 |
| Q9Y5K8 | V-type proton ATPase subunit D OS=Homo sapiens GN=ATP6V1D PE=1 SV=1 - [VATD_HUMAN]                        | 8.15   | 9.72  | 3  | 3  | 3  | 0.203 | 0.179 |
| O75348 | V-type proton ATPase subunit G 1 OS=Homo sapiens GN=ATP6V1G1 PE=1 SV=3 - [VATG1_HUMAN]                    | 14.82  | 16.95 | 2  | 2  | 4  | 0.123 | 0.127 |
| Q9NP79 | Vacuolar protein sorting-associated protein VTA1 homolog OS=Homo sapiens GN=VTA1 PE=1 SV=1 - [VTA1_HUMAN] | 5.84   | 2.61  | 2  | 2  | 2  | 0.311 | 0.272 |
| P18206 | Vinculin OS=Homo sapiens GN=VCL PE=1 SV=4 - [VINC_HUMAN]                                                  | 147.27 | 24.34 | 28 | 28 | 48 | 0.048 | 0.080 |
| O75083 | WD repeat-containing protein 1 OS=Homo sapiens GN=WDR1 PE=1 SV=4 - [WDR1_HUMAN]                           | 44.14  | 11.06 | 7  | 7  | 14 | 0.348 | 0.269 |
| P13010 | X-ray repair cross-complementing protein 5 OS=Homo sapiens GN=XRCC5 PE=1 SV=3 - [XRCC5_HUMAN]             | 11.15  | 5.60  | 4  | 4  | 4  | 0.136 | 0.126 |



|        |                                                                                                |       |      |   |   |   |       |       |
|--------|------------------------------------------------------------------------------------------------|-------|------|---|---|---|-------|-------|
| Q7Z2W4 | Zinc finger CCCH-type antiviral protein 1 OS=Homo sapiens GN=ZC3HAV1 PE=1 SV=3 - [ZCCHV_HUMAN] | 14.15 | 4.88 | 4 | 4 | 5 | 0.275 | 0.110 |
|--------|------------------------------------------------------------------------------------------------|-------|------|---|---|---|-------|-------|
