# Supplementary material
Source: PubMed Central journal article supplement (PMC5083095)
Supplement: 10.1074_M115.057315_mcp.M115.057315-10.pdf [file 10.1074_M115.057315_mcp.M115.057315-10.pdf]

**Supplemental Table 7. Proteins that differ in level by 10 fold or more between adult reticulocytes and RBCs.** See legend for Supplemental Table 4 for experimental details. Values show the ratio of protein levels between RBCs and reticulocytes in membrane (A) and cytosol (B) fraction.

**Supplemental Table 7A**

| Accession | Description                                                                                                                          | Unique Peptides | Peptides | Adult RBC/retic |
|-----------|--------------------------------------------------------------------------------------------------------------------------------------|-----------------|----------|-----------------|
| P51858    | Hepatoma-derived growth factor OS=Homo sapiens GN=HDGF PE=1 SV=1 - [HDGF_HUMAN]                                                      | 5               | 5        | 0.010           |
| P18859    | ATP synthase-coupling factor 6, mitochondrial OS=Homo sapiens GN=ATP5J PE=1 SV=1 - [ATP5J_HUMAN]                                     | 2               | 2        | 0.010           |
| A8MZH8    | Pituitary Tumor-Transforming 1 Interacting Protein OS=Homo sapiens GN=PTTG1IP PE=4 SV=1 - [A8MZH8_HUMAN]                             | 2               | 2        | 0.010           |
| P45880    | Voltage-dependent anion-selective channel protein 2 OS=Homo sapiens GN=VDAC2 PE=1 SV=2 - [VDAC2_HUMAN]                               | 11              | 12       | 0.014           |
| Q17RZ5    | Kinectin 1 (Kinesin receptor) OS=Homo sapiens GN=KTN1 PE=2 SV=1 - [Q17RZ5_HUMAN]                                                     | 3               | 3        | 0.014           |
| A8K6C4    | Aminolevulinate, delta-, synthase 2 OS=Homo sapiens GN=ALAS2 PE=2 SV=1 - [A8K6C4_HUMAN]                                              | 3               | 3        | 0.014           |
| P05141    | ADP/ATP translocase 2 OS=Homo sapiens GN=SLC25A5 PE=1 SV=7 - [ADT2_HUMAN]                                                            | 4               | 12       | 0.018           |
| Q13765    | Nascent polypeptide-associated complex subunit alpha OS=Homo sapiens GN=NACA PE=1 SV=1 - [NACA_HUMAN]                                | 2               | 2        | 0.020           |
| O75947    | ATP synthase subunit d, mitochondrial OS=Homo sapiens GN=ATP5H PE=1 SV=3 - [ATP5H_HUMAN]                                             | 7               | 7        | 0.020           |
| Q00325    | Phosphate carrier protein, mitochondrial OS=Homo sapiens GN=SLC25A3 PE=1 SV=2 - [MPCP_HUMAN]                                         | 6               | 6        | 0.021           |
| D6R967    | Pyrophosphatase OS=Homo sapiens GN=PPA2 PE=4 SV=1 - [D6R967_HUMAN]                                                                   | 2               | 2        | 0.023           |
| Q99536    | Synaptic vesicle membrane protein VAT-1 homolog OS=Homo sapiens GN=VAT1 PE=1 SV=2 - [VAT1_HUMAN]                                     | 3               | 3        | 0.024           |
| P78540    | Arginase-2, mitochondrial OS=Homo sapiens GN=ARG2 PE=1 SV=1 - [ARGI2_HUMAN]                                                          | 5               | 5        | 0.025           |
| P21796    | Voltage-dependent anion-selective channel protein 1 OS=Homo sapiens GN=VDAC1 PE=1 SV=2 - [VDAC1_HUMAN]                               | 9               | 11       | 0.025           |
| Q9Y6N5    | Sulfide:quinone oxidoreductase, mitochondrial OS=Homo sapiens GN=SQRDL PE=1 SV=1 - [SQRD_HUMAN]                                      | 9               | 9        | 0.027           |
| A8MZ71    | Cytochrome C Oxidase Subunit VIIa Polypeptide 2 OS=Homo sapiens GN=COX7A2 PE=4 SV=1 - [A8MZ71_HUMAN]                                 | 2               | 2        | 0.027           |
| Q16836    | Hydroxyacyl-coenzyme A dehydrogenase, mitochondrial OS=Homo sapiens GN=HADH PE=1 SV=3 - [HCDH_HUMAN]                                 | 6               | 6        | 0.028           |
| B4E358    | Cortactin OS=Homo sapiens GN=CTTN PE=2 SV=1 - [B4E358_HUMAN]                                                                         | 2               | 3        | 0.029           |
| P26583    | High mobility group protein B2 OS=Homo sapiens GN=HMGB2 PE=1 SV=2 - [HMGB2_HUMAN]                                                    | 2               | 2        | 0.029           |
| P31942    | Heterogeneous nuclear ribonucleoprotein H3 OS=Homo sapiens GN=HNRNPH3 PE=1 SV=2 - [HNRH3_HUMAN]                                      | 2               | 2        | 0.029           |
| P49458    | Signal recognition particle 9 kDa protein OS=Homo sapiens GN=SRP9 PE=1 SV=2 - [SRP09_HUMAN]                                          | 2               | 2        | 0.029           |
| P13010    | X-ray repair cross-complementing protein 5 OS=Homo sapiens GN=XRCC5 PE=1 SV=3 - [XRCC5_HUMAN]                                        | 4               | 4        | 0.031           |
| Q9Y277    | Voltage-dependent anion-selective channel protein 3 OS=Homo sapiens GN=VDAC3 PE=1 SV=1 - [VDAC3_HUMAN]                               | 13              | 15       | 0.032           |
| P07919    | Cytochrome b-c1 complex subunit 6, mitochondrial OS=Homo sapiens GN=UQCRH PE=1 SV=2 - [QCR6_HUMAN]                                   | 2               | 2        | 0.033           |
| F5H897    | TNF Receptor-Associated Protein 1 OS=Homo sapiens GN=TRAP1 PE=3 SV=1 - [F5H897_HUMAN]                                                | 5               | 6        | 0.034           |
| Q9NVJ2    | ADP-ribosylation factor-like protein 8B OS=Homo sapiens GN=ARL8B PE=1 SV=1 - [ARL8B_HUMAN]                                           | 4               | 4        | 0.034           |
| F5GWQ7    | TAF15 RNA Polymerase II, TATA Box Binding Protein (TBP)-Associated Factor, 68kDa OS=Homo sapiens GN=TAF15 PE=4 SV=1 - [F5GWQ7_HUMAN] | 2               | 4        | 0.034           |
| B8ZZL8    | Heat shock 10kDa protein 1 (Chaperonin 10), isoform CRA_b OS=Homo sapiens GN=HSPE1 PE=3 SV=1 - [B8ZZL8_HUMAN]                        | 8               | 8        | 0.037           |
| P30049    | ATP synthase subunit delta, mitochondrial OS=Homo sapiens GN=ATP5D PE=1 SV=2 - [ATPD_HUMAN]                                          | 2               | 2        | 0.037           |

|        |                                                                                                                             |    |    |       |
|--------|-----------------------------------------------------------------------------------------------------------------------------|----|----|-------|
| P24534 | Elongation factor 1-beta OS=Homo sapiens GN=EEF1B2 PE=1 SV=3 - [EF1B_HUMAN]                                                 | 2  | 3  | 0.039 |
| Q16822 | Phosphoenolpyruvate carboxykinase [GTP], mitochondrial OS=Homo sapiens GN=PCK2 PE=1 SV=3 - [PCKGM_HUMAN]                    | 4  | 4  | 0.039 |
| Q00059 | Transcription factor A, mitochondrial OS=Homo sapiens GN=TFAM PE=1 SV=1 - [TFAM_HUMAN]                                      | 5  | 5  | 0.039 |
| P08574 | Cytochrome c1, heme protein, mitochondrial OS=Homo sapiens GN=CYC1 PE=1 SV=3 - [CY1_HUMAN]                                  | 2  | 2  | 0.040 |
| F5H6F4 | Acyl-CoA Synthetase Short-Chain Family Member 1 OS=Homo sapiens GN=ACSS1 PE=4 SV=1 - [F5H6F4_HUMAN]                         | 2  | 3  | 0.040 |
| P02792 | Ferritin light chain OS=Homo sapiens GN=FTL PE=1 SV=2 - [FRIL_HUMAN]                                                        | 7  | 7  | 0.041 |
| P46781 | 40S ribosomal protein S9 OS=Homo sapiens GN=RPS9 PE=1 SV=3 - [RS9_HUMAN]                                                    | 9  | 9  | 0.041 |
| P25705 | ATP synthase subunit alpha, mitochondrial OS=Homo sapiens GN=ATP5A1 PE=1 SV=1 - [ATPA_HUMAN]                                | 20 | 20 | 0.042 |
| Q96199 | Succinyl-CoA ligase [GDP-forming] subunit beta, mitochondrial OS=Homo sapiens GN=SUCLG2 PE=1 SV=2 - [SUCB2_HUMAN]           | 4  | 4  | 0.043 |
| P40429 | 60S ribosomal protein L13a OS=Homo sapiens GN=RPL13A PE=1 SV=2 - [RL13A_HUMAN]                                              | 5  | 5  | 0.044 |
| P62081 | 40S ribosomal protein S7 OS=Homo sapiens GN=RPS7 PE=1 SV=1 - [RS7_HUMAN]                                                    | 3  | 3  | 0.044 |
| C9JXB8 | Ribosomal Protein L24 OS=Homo sapiens GN=RPL24 PE=4 SV=1 - [C9JXB8_HUMAN]                                                   | 4  | 4  | 0.044 |
| P39019 | 40S ribosomal protein S19 OS=Homo sapiens GN=RPS19 PE=1 SV=2 - [RS19_HUMAN]                                                 | 8  | 8  | 0.045 |
| C9JFR7 | Cytochrome C, Somatic OS=Homo sapiens GN=CYCS PE=3 SV=1 - [C9JFR7_HUMAN]                                                    | 6  | 6  | 0.045 |
| Q92820 | Gamma-glutamyl hydrolase OS=Homo sapiens GN=GGH PE=1 SV=2 - [GGH_HUMAN]                                                     | 2  | 2  | 0.046 |
| P62249 | 40S ribosomal protein S16 OS=Homo sapiens GN=RPS16 PE=1 SV=2 - [RS16_HUMAN]                                                 | 6  | 6  | 0.050 |
| Q9NX63 | Coiled-coil-helix-coiled-coil-helix domain-containing protein 3 OS=Homo sapiens GN=CHCHD3 PE=1 SV=1 - [CHCH3_HUMAN]         | 8  | 8  | 0.050 |
| D6RGI3 | Septin 11, isoform CRA_b OS=Homo sapiens GN=SEPT11 PE=3 SV=1 - [D6RGI3_HUMAN]                                               | 3  | 5  | 0.050 |
| P48047 | ATP synthase subunit O, mitochondrial OS=Homo sapiens GN=ATP5O PE=1 SV=1 - [ATPO_HUMAN]                                     | 12 | 12 | 0.051 |
| B8ZZI3 | Prothymosin, Alpha OS=Homo sapiens GN=PTMA PE=4 SV=1 - [B8ZZI3_HUMAN]                                                       | 2  | 2  | 0.051 |
| E9PN17 | ATP Synthase, H+ Transporting OS=Homo sapiens GN=ATP5L PE=4 SV=1 - [E9PN17_HUMAN]                                           | 4  | 5  | 0.052 |
| Q9Y4W6 | AFG3-like protein 2 OS=Homo sapiens GN=AFG3L2 PE=1 SV=2 - [AFG32_HUMAN]                                                     | 5  | 5  | 0.052 |
| B5MCX3 | Septin 2 OS=Homo sapiens GN=SEPT2 PE=3 SV=1 - [B5MCX3_HUMAN]                                                                | 5  | 5  | 0.053 |
| P46779 | 60S ribosomal protein L28 OS=Homo sapiens GN=RPL28 PE=1 SV=3 - [RL28_HUMAN]                                                 | 4  | 4  | 0.053 |
| Q13131 | 5'-AMP-activated protein kinase catalytic subunit alpha-1 OS=Homo sapiens GN=PRKAA1 PE=1 SV=4 - [AAPK1_HUMAN]               | 2  | 2  | 0.053 |
| P62753 | 40S ribosomal protein S6 OS=Homo sapiens GN=RPS6 PE=1 SV=1 - [RS6_HUMAN]                                                    | 7  | 7  | 0.053 |
| O15372 | Eukaryotic translation initiation factor 3 subunit H OS=Homo sapiens GN=EIF3H PE=1 SV=1 - [EIF3H_HUMAN]                     | 6  | 6  | 0.054 |
| O60313 | Dynamin-like 120 kDa protein, mitochondrial OS=Homo sapiens GN=OPA1 PE=1 SV=3 - [OPA1_HUMAN]                                | 7  | 7  | 0.055 |
| P10606 | Cytochrome c oxidase subunit 5B, mitochondrial OS=Homo sapiens GN=COX5B PE=1 SV=2 - [COX5B_HUMAN]                           | 4  | 4  | 0.055 |
| B4DME8 | DEAD (Asp-Glu-Ala-Asp) Box Helicase 1n OS=Homo sapiens GN=DDX1 PE=2 SV=1 - [B4DME8_HUMAN]                                   | 2  | 2  | 0.056 |
| Q92947 | Glutaryl-CoA dehydrogenase, mitochondrial OS=Homo sapiens GN=GCDH PE=1 SV=1 - [GCDH_HUMAN]                                  | 2  | 2  | 0.057 |
| P46782 | 40S ribosomal protein S5 OS=Homo sapiens GN=RPS5 PE=1 SV=4 - [RS5_HUMAN]                                                    | 4  | 4  | 0.058 |
| B4DJ81 | NADH Dehydrogenase (Ubiquinone) Fe-S Protein 1 OS=Homo sapiens GN=NDUFS1 PE=2 SV=1 - [B4DJ81_HUMAN]                         | 2  | 2  | 0.058 |
| B4E2Z3 | Solute Carrier Family 3 (Amino Acid Transporter Heavy Chain), Member 2 OS=Homo sapiens GN=SLC3A2 PE=2 SV=1 - [B4E2Z3_HUMAN] | 3  | 3  | 0.058 |
| Q13011 | Delta(3,5)-Delta(2,4)-dienoyl-CoA isomerase, mitochondrial OS=Homo sapiens GN=ECH1 PE=1 SV=2 - [ECH1_HUMAN]                 | 9  | 9  | 0.060 |
| A6NJH9 | Eukaryotic Translation Initiation Factor 1A OS=Homo sapiens GN=EIF1AY                                                       | 3  | 3  | 0.060 |

|        |                                                                                                                 |    |    |       |
|--------|-----------------------------------------------------------------------------------------------------------------|----|----|-------|
|        | PE=4 SV=1 - [A6NJH9_HUMAN]                                                                                      |    |    |       |
| P20674 | Cytochrome c oxidase subunit 5A, mitochondrial OS=Homo sapiens GN=COX5A PE=1 SV=2 - [COX5A_HUMAN]               | 3  | 3  | 0.061 |
| P00505 | Aspartate aminotransferase, mitochondrial OS=Homo sapiens GN=GOT2 PE=1 SV=3 - [AATM_HUMAN]                      | 13 | 13 | 0.062 |
| B7ZAM9 | Eukaryotic Translation Initiation Factor 3, Subunit K OS=Homo sapiens GN=EIF3K PE=2 SV=1 - [B7ZAM9_HUMAN]       | 3  | 3  | 0.063 |
| P62851 | 40S ribosomal protein S25 OS=Homo sapiens GN=RPS25 PE=1 SV=1 - [RS25_HUMAN]                                     | 2  | 2  | 0.063 |
| P40926 | Malate dehydrogenase, mitochondrial OS=Homo sapiens GN=MDH2 PE=1 SV=3 - [MDHM_HUMAN]                            | 14 | 14 | 0.064 |
| B4DR70 | Fused In Sarcoma OS=Homo sapiens GN=FUS PE=2 SV=1 - [B4DR70_HUMAN]                                              | 3  | 5  | 0.064 |
| P01023 | Alpha-2-macroglobulin OS=Homo sapiens GN=A2M PE=1 SV=3 - [A2MG_HUMAN]                                           | 11 | 11 | 0.066 |
| Q8NC51 | Plasminogen activator inhibitor 1 RNA-binding protein OS=Homo sapiens GN=SERBP1 PE=1 SV=2 - [PAIRB_HUMAN]       | 10 | 10 | 0.068 |
| P36957 | Dihydrolypoyllysine-residue succinyltransferase OS=Homo sapiens GN=DLST PE=1 SV=4 - [ODO2_HUMAN]                | 10 | 10 | 0.068 |
| P52272 | Heterogeneous nuclear ribonucleoprotein M OS=Homo sapiens GN=HNRNPM PE=1 SV=3 - [HNRPM_HUMAN]                   | 9  | 9  | 0.068 |
| Q9Y5M8 | Signal recognition particle receptor subunit beta OS=Homo sapiens GN=SRPRB PE=1 SV=3 - [SRPRB_HUMAN]            | 2  | 2  | 0.068 |
| P60174 | Triosephosphate isomerase OS=Homo sapiens GN=TPI1 PE=1 SV=2 - [TPIS_HUMAN]                                      | 8  | 8  | 0.069 |
| F5H3C5 | Superoxide Dismutase 2 OS=Homo sapiens GN=SOD2 PE=3 SV=1 - [F5H3C5_HUMAN]                                       | 4  | 4  | 0.069 |
| C9JW96 | prohibitin OS=Homo sapiens GN=PHB PE=4 SV=2 - [C9JW96_HUMAN]                                                    | 12 | 12 | 0.070 |
| P61353 | 60S ribosomal protein L27 OS=Homo sapiens GN=RPL27 PE=1 SV=2 - [RL27_HUMAN]                                     | 4  | 4  | 0.070 |
| Q9BRP8 | Partner of Y14 and mago OS=Homo sapiens GN=WIBG PE=1 SV=1 - [WIBG_HUMAN]                                        | 3  | 3  | 0.071 |
| Q9Y262 | Eukaryotic translation initiation factor 3 subunit L OS=Homo sapiens GN=EIF3L PE=1 SV=1 - [EIF3L_HUMAN]         | 5  | 6  | 0.072 |
| Q9NZD4 | Alpha-hemoglobin-stabilizing protein OS=Homo sapiens GN=AHSP PE=1 SV=1 - [AHSP_HUMAN]                           | 3  | 3  | 0.073 |
| B4DY76 | Protoporphyrinogen Oxidase OS=Homo sapiens GN=PPOX PE=2 SV=1 - [B4DY76_HUMAN]                                   | 5  | 5  | 0.074 |
| B4DVY1 | Eukaryotic Translation Initiation Factor 3, Subunit D OS=Homo sapiens GN=EIF3D PE=2 SV=1 - [B4DVY1_HUMAN]       | 3  | 3  | 0.074 |
| Q9BQE3 | Tubulin alpha-1C chain OS=Homo sapiens GN=TUBA1C PE=1 SV=1 - [TBA1C_HUMAN]                                      | 4  | 13 | 0.074 |
| Q9NYZ2 | Mitoferrin-1 OS=Homo sapiens GN=SLC25A37 PE=1 SV=2 - [MFRN1_HUMAN]                                              | 3  | 4  | 0.075 |
| E9PE82 | Acyl-CoA Dehydrogenase, C-2 To C-3 Short Chain OS=Homo sapiens GN=ACADS PE=4 SV=1 - [E9PE82_HUMAN]              | 2  | 2  | 0.075 |
| P07602 | Proactivator polypeptide OS=Homo sapiens GN=PSAP PE=1 SV=2 - [SAP_HUMAN]                                        | 13 | 13 | 0.075 |
| B4E1K7 | Stomatin (EPB72)-Like 2 OS=Homo sapiens GN=STOML2 PE=2 SV=1 - [B4E1K7_HUMAN]                                    | 8  | 8  | 0.076 |
| Q5JR95 | Ribosomal protein S8 OS=Homo sapiens GN=RPS8 PE=4 SV=1 - [Q5JR95_HUMAN]                                         | 3  | 3  | 0.076 |
| C9J406 | Inner Membrane Protein, Mitochondrial OS=Homo sapiens GN=IMMT PE=4 SV=1 - [C9J406_HUMAN]                        | 23 | 24 | 0.076 |
| P37837 | Transaldolase OS=Homo sapiens GN=TALDO1 PE=1 SV=2 - [TALDO_HUMAN]                                               | 7  | 7  | 0.076 |
| Q8NG06 | Tripartite motif-containing protein 58 OS=Homo sapiens GN=TRIM58 PE=2 SV=2 - [TRI58_HUMAN]                      | 10 | 11 | 0.077 |
| O95202 | LETM1 and EF-hand domain-containing protein 1, mitochondrial OS=Homo sapiens GN=LETM1 PE=1 SV=1 - [LETM1_HUMAN] | 4  | 4  | 0.077 |
| P38117 | Electron transfer flavoprotein subunit beta OS=Homo sapiens GN=ETFB PE=1 SV=3 - [ETFB_HUMAN]                    | 9  | 9  | 0.077 |
| A8MVQ3 | CysteinyI-tRNA synthetase, isoform CRA_b OS=Homo sapiens GN=CARS PE=2 SV=1 - [A8MVQ3_HUMAN]                     | 2  | 2  | 0.079 |
| Q9ULV4 | Coronin-1C OS=Homo sapiens GN=CORO1C PE=1 SV=1 - [COR1C_HUMAN]                                                  | 14 | 14 | 0.080 |
| O95831 | Apoptosis-inducing factor 1, mitochondrial OS=Homo sapiens GN=AIFM1 PE=1 SV=1 - [AIFM1_HUMAN]                   | 5  | 6  | 0.080 |
| Q9H845 | Acyl-CoA dehydrogenase family member 9, mitochondrial OS=Homo sapiens GN=ACAD9 PE=1 SV=1 - [ACAD9_HUMAN]        | 5  | 5  | 0.081 |

|        |                                                                                                                          |    |    |        |
|--------|--------------------------------------------------------------------------------------------------------------------------|----|----|--------|
| Q02978 | Mitochondrial 2-oxoglutarate/malate carrier protein OS=Homo sapiens GN=SLC25A11 PE=1 SV=3 - [M2OM_HUMAN]                 | 4  | 5  | 0.081  |
| P04181 | Ornithine aminotransferase, mitochondrial OS=Homo sapiens GN=OAT PE=1 SV=1 - [OAT_HUMAN]                                 | 10 | 10 | 0.081  |
| E9PCK0 | Hexokinase 1 OS=Homo sapiens GN=HK1 PE=3 SV=1 - [E9PCK0_HUMAN]                                                           | 6  | 6  | 0.081  |
| P42677 | 40S ribosomal protein S27 OS=Homo sapiens GN=RPS27 PE=1 SV=3 - [RS27_HUMAN]                                              | 2  | 2  | 0.082  |
| P62829 | 60S ribosomal protein L23 OS=Homo sapiens GN=RPL23 PE=1 SV=1 - [RL23_HUMAN]                                              | 3  | 3  | 0.083  |
| P42126 | Enoyl-CoA delta isomerase 1, mitochondrial OS=Homo sapiens GN=ECI1 PE=1 SV=1 - [ECI1_HUMAN]                              | 3  | 3  | 0.084  |
| Q5STZ8 | ATP-binding cassette sub-family F (GCN20) member 1 (Fragment) OS=Homo sapiens GN=ABCF1 PE=2 SV=2 - [Q5STZ8_HUMAN]        | 2  | 4  | 0.084  |
| Q9UHV9 | Prefoldin subunit 2 OS=Homo sapiens GN=PFDN2 PE=1 SV=1 - [PFD2_HUMAN]                                                    | 2  | 2  | 0.084  |
| Q99497 | Protein DJ-1 OS=Homo sapiens GN=PARK7 PE=1 SV=2 - [PARK7_HUMAN]                                                          | 3  | 3  | 0.086  |
| O00483 | NADH dehydrogenase [ubiquinone] 1 alpha subcomplex subunit 4 OS=Homo sapiens GN=NDUFA4 PE=1 SV=1 - [NDUA4_HUMAN]         | 2  | 2  | 0.086  |
| Q9H1E3 | Nuclear ubiquitous casein and cyclin-dependent kinases substrate OS=Homo sapiens GN=NUCKS1 PE=1 SV=1 - [NUCKS_HUMAN]     | 2  | 2  | 0.086  |
| B7Z4V2 | Heat Shock 70kDa Protein 9 OS=Homo sapiens GN=HSPA9 PE=2 SV=1 - [B7Z4V2_HUMAN]                                           | 23 | 24 | 0.088  |
| Q969J3 | Loss of heterozygosity 12 chromosomal region 1 protein OS=Homo sapiens GN=LOH12CR1 PE=1 SV=1 - [L12R1_HUMAN]             | 2  | 2  | 0.088  |
| Q96QK1 | Vacuolar protein sorting-associated protein 35 OS=Homo sapiens GN=VPS35 PE=1 SV=2 - [VPS35_HUMAN]                        | 6  | 6  | 0.089  |
| F5H2W0 | Macrophage Inhibitory Cytokine 1 OS=Homo sapiens GN=C18orf8 PE=4 SV=1 - [F5H2W0_HUMAN]                                   | 2  | 2  | 0.089  |
| O60841 | Eukaryotic translation initiation factor 5B OS=Homo sapiens GN=EIF5B PE=1 SV=4 - [IF2P_HUMAN]                            | 2  | 3  | 0.090  |
| Q92616 | Translational activator GCN1 OS=Homo sapiens GN=GCN1L1 PE=1 SV=6 - [GCN1L_HUMAN]                                         | 2  | 2  | 0.090  |
| Q9BWH2 | FUN14 domain-containing protein 2 OS=Homo sapiens GN=FUNDC2 PE=1 SV=2 - [FUND2_HUMAN]                                    | 2  | 2  | 0.091  |
| P63244 | Guanine nucleotide-binding protein subunit beta-2-like 1 OS=Homo sapiens GN=GNB2L1 PE=1 SV=3 - [GBLP_HUMAN]              | 9  | 9  | 0.092  |
| Q86SX6 | Glutaredoxin-related protein 5, mitochondrial OS=Homo sapiens GN=GLRX5 PE=1 SV=2 - [GLRX5_HUMAN]                         | 4  | 4  | 0.093  |
| P02787 | Serotransferrin OS=Homo sapiens GN=TF PE=1 SV=3 - [TRFE_HUMAN]                                                           | 22 | 22 | 0.095  |
| Q15365 | Poly(rC)-binding protein 1 OS=Homo sapiens GN=PCBP1 PE=1 SV=2 - [PCBP1_HUMAN]                                            | 5  | 9  | 0.095  |
| P15104 | Glutamine synthetase OS=Homo sapiens GN=GLUL PE=1 SV=4 - [GLNA_HUMAN]                                                    | 3  | 3  | 0.095  |
| D2K8Q1 | AAA domain containing 3A protein OS=Homo sapiens GN=ATAD3A PE=2 SV=1 - [D2K8Q1_HUMAN]                                    | 7  | 7  | 0.095  |
| P15880 | 40S ribosomal protein S2 OS=Homo sapiens GN=RPS2 PE=1 SV=2 - [RS2_HUMAN]                                                 | 7  | 7  | 0.096  |
| C9K025 | Ribosomal Protein L35a OS=Homo sapiens GN=RPL35A PE=4 SV=1 - [C9K025_HUMAN]                                              | 3  | 3  | 0.096  |
| P68104 | Elongation factor 1-alpha 1 OS=Homo sapiens GN=EEF1A1 PE=1 SV=1 - [EF1A1_HUMAN]                                          | 16 | 16 | 0.096  |
| P07686 | Beta-hexosaminidase subunit beta OS=Homo sapiens GN=HEXB PE=1 SV=3 - [HEXB_HUMAN]                                        | 6  | 6  | 0.097  |
| Q9P2E9 | Ribosome-binding protein 1 OS=Homo sapiens GN=RRBP1 PE=1 SV=4 - [RRBP1_HUMAN]                                            | 6  | 7  | 0.097  |
| Q2L6I2 | ABC50 protein OS=Homo sapiens GN=ABCF1 PE=2 SV=1 - [Q2L6I2_HUMAN]                                                        | 2  | 4  | 0.098  |
| Q12904 | Aminoacyl tRNA synthase complex-interacting multifunctional protein 1 OS=Homo sapiens GN=AIMP1 PE=1 SV=2 - [AIMP1_HUMAN] | 2  | 2  | 0.100  |
| Q9H9B4 | Sideroflexin-1 OS=Homo sapiens GN=SFXN1 PE=1 SV=4 - [SFXN1_HUMAN]                                                        | 4  | 4  | 0.100  |
| B8Q185 | Glycophorin A MNS blood group OS=Homo sapiens GN=GYP A PE=4 SV=1 - [B8Q185_HUMAN]                                        | 3  | 3  | 10.251 |
| Q00796 | Sorbitol dehydrogenase OS=Homo sapiens GN=SORD PE=1 SV=4 - [DHSO_HUMAN]                                                  | 12 | 12 | 12.996 |
| P14091 | Cathepsin E OS=Homo sapiens GN=CTSE PE=1 SV=2 - [CATE_HUMAN]                                                             | 2  | 2  | 17.672 |

**Supplemental Table 7B.**

| Accession | Description                                                                                                     | Unique Peptides | Peptides | Adult RBC/retic |
|-----------|-----------------------------------------------------------------------------------------------------------------|-----------------|----------|-----------------|
| P62857    | 40S ribosomal protein S28 OS=Homo sapiens GN=RPS28 PE=1 SV=1 - [RS28_HUMAN]                                     | 2               | 2        | 0.013           |
| B8ZZL8    | Heat shock 10kDa protein 1, isoform CRA_b OS=Homo sapiens GN=HSPE1 PE=3 SV=1 - [B8ZZL8_HUMAN]                   | 3               | 3        | 0.013           |
| B8ZZQ6    | Prothymosin, Alpha OS=Homo sapiens GN=PTMA PE=4 SV=1 - [B8ZZQ6_HUMAN]                                           | 4               | 4        | 0.015           |
| E7ESM6    | Tudor-SN OS=Homo sapiens GN=SND1 PE=4 SV=2 - [E7ESM6_HUMAN]                                                     | 6               | 6        | 0.017           |
| P35908    | Keratin, type II cytoskeletal 2 epidermal OS=Homo sapiens GN=KRT2 PE=1 SV=2 - [K22E_HUMAN]                      | 2               | 2        | 0.017           |
| E7EP96    | KH-Type Splicing Regulatory Protein OS=Homo sapiens GN=KHSRP PE=4 SV=1 - [E7EP96_HUMAN]                         | 2               | 3        | 0.023           |
| A8MW06    | Thymosin beta-4-like protein 3 OS=Homo sapiens GN=TMSL3 PE=2 SV=1 - [TMSL3_HUMAN]                               | 4               | 4        | 0.024           |
| P68104    | Elongation factor 1-alpha 1 OS=Homo sapiens GN=EEF1A1 PE=1 SV=1 - [EF1A1_HUMAN]                                 | 15              | 15       | 0.026           |
| E9PGF9    | Meningioma Expressed Antigen 5 OS=Homo sapiens GN=MGEA5 PE=4 SV=1 - [E9PGF9_HUMAN]                              | 3               | 4        | 0.030           |
| P49591    | Seryl-tRNA synthetase, cytoplasmic OS=Homo sapiens GN=SARS PE=1 SV=3 - [SYSC_HUMAN]                             | 6               | 6        | 0.030           |
| P18621    | 60S ribosomal protein L17 OS=Homo sapiens GN=RPL17 PE=1 SV=3 - [RL17_HUMAN]                                     | 4               | 4        | 0.034           |
| P49207    | 60S ribosomal protein L34 OS=Homo sapiens GN=RPL34 PE=1 SV=3 - [RL34_HUMAN]                                     | 2               | 2        | 0.034           |
| Q15813    | Tubulin-specific chaperone E OS=Homo sapiens GN=TBCE PE=1 SV=1 - [TBCE_HUMAN]                                   | 3               | 3        | 0.036           |
| B3KX72    | Heterogeneous Nuclear Ribonucleoprotein U OS=Homo sapiens GN=HNRNPU PE=2 SV=1 - [B3KX72_HUMAN]                  | 3               | 3        | 0.036           |
| P51858    | Hepatoma-derived growth factor OS=Homo sapiens GN=HDGF PE=1 SV=1 - [HDGF_HUMAN]                                 | 8               | 8        | 0.036           |
| P27797    | Calreticulin OS=Homo sapiens GN=CALR PE=1 SV=1 - [CALR_HUMAN]                                                   | 6               | 6        | 0.037           |
| P20962    | Parathymosin OS=Homo sapiens GN=PTMS PE=1 SV=2 - [PTMS_HUMAN]                                                   | 3               | 3        | 0.037           |
| P49588    | Alanyl-tRNA synthetase, cytoplasmic OS=Homo sapiens GN=AARS PE=1 SV=2 - [SYAC_HUMAN]                            | 23              | 23       | 0.038           |
| Q13347    | Eukaryotic translation initiation factor 3 subunit I OS=Homo sapiens GN=EIF3I PE=1 SV=1 - [EIF3I_HUMAN]         | 2               | 2        | 0.038           |
| P60866    | 40S ribosomal protein S20 OS=Homo sapiens GN=RPS20 PE=1 SV=1 - [RS20_HUMAN]                                     | 2               | 2        | 0.038           |
| Q7Z7N6    | NUDT1 protein OS=Homo sapiens GN=NUDT1 PE=2 SV=2 - [Q7Z7N6_HUMAN]                                               | 2               | 2        | 0.040           |
| E7EVE3    | ankyrin1 OS=Homo sapiens GN=ANK1 PE=4 SV=1 - [E7EVE3_HUMAN]                                                     | 10              | 10       | 0.041           |
| Q9Y617    | Phosphoserine aminotransferase OS=Homo sapiens GN=PSAT1 PE=1 SV=2 - [SERC_HUMAN]                                | 11              | 12       | 0.041           |
| P04264    | Keratin, type II cytoskeletal 1 OS=Homo sapiens GN=KRT1 PE=1 SV=6 - [K2C1_HUMAN]                                | 11              | 12       | 0.042           |
| E9PS50    | Ribosomal Protein S13 OS=Homo sapiens GN=RPS13 PE=4 SV=1 - [E9PS50_HUMAN]                                       | 3               | 3        | 0.042           |
| D9YZV7    | Tropomyosin 1 (Alpha) isoform 6 OS=Homo sapiens GN=TPM1 PE=3 SV=1 - [D9YZV7_HUMAN]                              | 2               | 9        | 0.043           |
| B4DS57    | cDNA FLJ53176, highly similar to Nuclear autoantigenic sperm protein OS=Homo sapiens PE=2 SV=1 - [B4DS57_HUMAN] | 5               | 6        | 0.043           |
| P26373    | 60S ribosomal protein L13 OS=Homo sapiens GN=RPL13 PE=1 SV=4 - [RL13_HUMAN]                                     | 4               | 4        | 0.044           |
| P35580    | Myosin-10 OS=Homo sapiens GN=MYH10 PE=1 SV=3 - [MYH10_HUMAN]                                                    | 22              | 36       | 0.044           |
| P52272    | Heterogeneous nuclear ribonucleoprotein M OS=Homo sapiens GN=HNRNPM PE=1 SV=3 - [HNRPM_HUMAN]                   | 3               | 3        | 0.044           |
| A6NJ11    | Ubiquitin Fusion Degradation 1 Like OS=Homo sapiens GN=UFD1L PE=4 SV=1 - [A6NJ11_HUMAN]                         | 2               | 3        | 0.045           |
| C9JB13    | BSD Domain Containing 1 OS=Homo sapiens GN=BSDC1 PE=4 SV=1 - [C9JB13_HUMAN]                                     | 3               | 3        | 0.046           |
| P23396    | 40S ribosomal protein S3 OS=Homo sapiens GN=RPS3 PE=1 SV=2 - [RS3_HUMAN]                                        | 5               | 5        | 0.046           |
| P62280    | 40S ribosomal protein S11 OS=Homo sapiens GN=RPS11 PE=1 SV=3 -                                                  | 2               | 2        | 0.047           |

|        | [RS11_HUMAN]                                                                                                      |    |    |       |
|--------|-------------------------------------------------------------------------------------------------------------------|----|----|-------|
| F5H1I1 | Eukaryotic Translation Initiation Factor 3, Subunit C OS=Homo sapiens GN=EIF3C PE=4 SV=1 - [F5H1I1_HUMAN]         | 4  | 4  | 0.047 |
| D6R9B6 | Ribosomal protein S3A, isoform CRA_e OS=Homo sapiens GN=RPS3A PE=4 SV=1 - [D6R9B6_HUMAN]                          | 4  | 4  | 0.047 |
| Q2L6I2 | ABC50 protein OS=Homo sapiens GN=ABCF1 PE=2 SV=1 - [Q2L6I2_HUMAN]                                                 | 4  | 4  | 0.047 |
| P18206 | Vinculin OS=Homo sapiens GN=VCL PE=1 SV=4 - [VINC_HUMAN]                                                          | 28 | 28 | 0.048 |
| Q9Y266 | Nuclear migration protein nudC OS=Homo sapiens GN=NUDC PE=1 SV=1 - [NUDC_HUMAN]                                   | 5  | 5  | 0.049 |
| E7ETK6 | Signal Recognition Particle 68kDa OS=Homo sapiens GN=SRP68 PE=4 SV=1 - [E7ETK6_HUMAN]                             | 2  | 2  | 0.049 |
| P24534 | Elongation factor 1-beta OS=Homo sapiens GN=EEF1B2 PE=1 SV=3 - [EF1B_HUMAN]                                       | 3  | 4  | 0.050 |
| P02730 | Band 3 anion transport protein OS=Homo sapiens GN=SLC4A1 PE=1 SV=3 - [B3AT_HUMAN]                                 | 7  | 7  | 0.050 |
| P23193 | Transcription elongation factor A protein 1 OS=Homo sapiens GN=TCEA1 PE=1 SV=2 - [TCEA1_HUMAN]                    | 4  | 4  | 0.051 |
| Q9NZD4 | Alpha-hemoglobin-stabilizing protein OS=Homo sapiens GN=AHSP PE=1 SV=1 - [AHSP_HUMAN]                             | 7  | 7  | 0.051 |
| P35527 | Keratin, type I cytoskeletal 9 OS=Homo sapiens GN=KRT9 PE=1 SV=3 - [K1C9_HUMAN]                                   | 9  | 9  | 0.052 |
| P15104 | Glutamine synthetase OS=Homo sapiens GN=GLUL PE=1 SV=4 - [GLNA_HUMAN]                                             | 7  | 7  | 0.052 |
| F5H0N0 | Actin, Gamma 1 OS=Homo sapiens GN=ACTG1 PE=3 SV=1 - [F5H0N0_HUMAN]                                                | 4  | 13 | 0.053 |
| Q5TCU6 | Talin 1 OS=Homo sapiens GN=TLN1 PE=2 SV=1 - [Q5TCU6_HUMAN]                                                        | 65 | 66 | 0.053 |
| O75821 | Eukaryotic translation initiation factor 3 subunit G OS=Homo sapiens GN=EIF3G PE=1 SV=2 - [EIF3G_HUMAN]           | 6  | 6  | 0.054 |
| P62249 | 40S ribosomal protein S16 OS=Homo sapiens GN=RPS16 PE=1 SV=2 - [RS16_HUMAN]                                       | 4  | 4  | 0.054 |
| B4DV79 | Eukaryotic Translation Initiation Factor 3, Subunit B OS=Homo sapiens GN=EIF3B PE=2 SV=1 - [B4DV79_HUMAN]         | 5  | 5  | 0.056 |
| B4E2V5 | Stomatin OS=Homo sapiens GN=STOM PE=2 SV=1 - [B4E2V5_HUMAN]                                                       | 3  | 3  | 0.056 |
| Q00688 | Peptidyl-prolyl cis-trans isomerase FKBP3 OS=Homo sapiens GN=FKBP3 PE=1 SV=1 - [FKBP3_HUMAN]                      | 4  | 4  | 0.058 |
| E9PDE8 | heat shock 70kDa protein 4-like OS=Homo sapiens GN=HSPA4L PE=3 SV=1 - [E9PDE8_HUMAN]                              | 2  | 3  | 0.059 |
| D9YZV5 | Tropomyosin 1 (Alpha) isoform 4 OS=Homo sapiens GN=TPM1 PE=3 SV=1 - [D9YZV5_HUMAN]                                | 3  | 10 | 0.059 |
| P26641 | Elongation factor 1-gamma OS=Homo sapiens GN=EEF1G PE=1 SV=3 - [EF1G_HUMAN]                                       | 12 | 12 | 0.059 |
| P16949 | Stathmin OS=Homo sapiens GN=STMN1 PE=1 SV=3 - [STMN1_HUMAN]                                                       | 14 | 14 | 0.060 |
| P07814 | Bifunctional aminoacyl-tRNA synthetase OS=Homo sapiens GN=EPRS PE=1 SV=5 - [SYEP_HUMAN]                           | 4  | 4  | 0.060 |
| F5H6K0 | DEAH (Asp-Glu-Ala-His) box helicase 15 OS=Homo sapiens GN=DHX15 PE=4 SV=1 - [F5H6K0_HUMAN]                        | 2  | 2  | 0.061 |
| Q92688 | Acidic leucine-rich nuclear phosphoprotein 32 family member B OS=Homo sapiens GN=ANP32B PE=1 SV=1 - [AN32B_HUMAN] | 3  | 5  | 0.062 |
| E9PDI1 | glycerophosphocholine phosphodiesterase GDE1 homolog OS=Homo sapiens GN=GPCPD1 PE=4 SV=1 - [E9PDI1_HUMAN]         | 2  | 2  | 0.063 |
| Q13442 | 28 kDa heat- and acid-stable phosphoprotein OS=Homo sapiens GN=PDAP1 PE=1 SV=1 - [HAP28_HUMAN]                    | 7  | 7  | 0.063 |
| P22626 | Heterogeneous nuclear ribonucleoproteins A2/B1 OS=Homo sapiens GN=HNRNPA2B1 PE=1 SV=2 - [ROA2_HUMAN]              | 7  | 10 | 0.063 |
| P40429 | 60S ribosomal protein L13a OS=Homo sapiens GN=RPL13A PE=1 SV=2 - [RL13A_HUMAN]                                    | 2  | 2  | 0.064 |
| P63244 | Guanine nucleotide-binding protein subunit beta-2-like 1 OS=Homo sapiens GN=GNB2L1 PE=1 SV=3 - [GBLP_HUMAN]       | 4  | 4  | 0.064 |
| Q5LJ98 | TROVE domain family, member 2 OS=Homo sapiens GN=TROVE2 PE=2 SV=1 - [Q5LJ98_HUMAN]                                | 3  | 3  | 0.064 |
| P17931 | Galectin-3 OS=Homo sapiens GN=LGALS3 PE=1 SV=5 - [LEG3_HUMAN]                                                     | 7  | 7  | 0.064 |
| P06744 | Glucose-6-phosphate isomerase OS=Homo sapiens GN=GPI PE=1 SV=4 - [G6PI_HUMAN]                                     | 19 | 19 | 0.065 |
| P05455 | Lupus La protein OS=Homo sapiens GN=SSB PE=1 SV=2 - [LA_HUMAN]                                                    | 5  | 5  | 0.065 |
| P49327 | Fatty acid synthase OS=Homo sapiens GN=FASN PE=1 SV=3 - [FAS_HUMAN]                                               | 34 | 34 | 0.065 |
| Q96CG1 | ETF1 protein OS=Homo sapiens GN=ETF1 PE=2 SV=1 - [Q96CG1_HUMAN]                                                   | 4  | 4  | 0.065 |

|        |                                                                                                                                  |    |    |       |
|--------|----------------------------------------------------------------------------------------------------------------------------------|----|----|-------|
| P12829 | Myosin light chain 4 OS=Homo sapiens GN=MYL4 PE=1 SV=3 - [MYL4_HUMAN]                                                            | 4  | 4  | 0.065 |
| B4E0X8 | far upstream element (FUSE) binding protein 1 OS=Homo sapiens GN=FUBP1 PE=2 SV=1 - [B4E0X8_HUMAN]                                | 2  | 3  | 0.067 |
| P13645 | Keratin, type I cytoskeletal 10 OS=Homo sapiens GN=KRT10 PE=1 SV=6 - [K1C10_HUMAN]                                               | 5  | 5  | 0.067 |
| P62701 | 40S ribosomal protein S4, X isoform OS=Homo sapiens GN=RPS4X PE=1 SV=2 - [RS4X_HUMAN]                                            | 3  | 3  | 0.067 |
| P41250 | Glycyl-tRNA synthetase OS=Homo sapiens GN=GARS PE=1 SV=3 - [SYG_HUMAN]                                                           | 7  | 8  | 0.068 |
| P09651 | Heterogeneous nuclear ribonucleoprotein A1 OS=Homo sapiens GN=HNRNPA1 PE=1 SV=5 - [ROA1_HUMAN]                                   | 3  | 7  | 0.069 |
| Q4VBZ6 | EEF1D protein OS=Homo sapiens GN=EEF1D PE=1 SV=1 - [Q4VBZ6_HUMAN]                                                                | 3  | 4  | 0.070 |
| Q9ULV4 | Coronin-1C OS=Homo sapiens GN=CORO1C PE=1 SV=1 - [COR1C_HUMAN]                                                                   | 9  | 9  | 0.071 |
| P26639 | Threonyl-tRNA synthetase, cytoplasmic OS=Homo sapiens GN=TARS PE=1 SV=3 - [SYTC_HUMAN]                                           | 7  | 7  | 0.072 |
| E7EWX4 | actin related protein 2/3 complex, subunit 4 OS=Homo sapiens GN=ARPC4 PE=4 SV=1 - [E7EWX4_HUMAN]                                 | 2  | 2  | 0.072 |
| P20042 | Eukaryotic translation initiation factor 2 subunit 2 OS=Homo sapiens GN=EIF2S2 PE=1 SV=2 - [IF2B_HUMAN]                          | 4  | 4  | 0.073 |
| Q8NFP7 | Diphosphoinositol polyphosphate phosphohydrolase 3-alpha OS=Homo sapiens GN=NUDT10 PE=1 SV=1 - [NUD10_HUMAN]                     | 2  | 2  | 0.074 |
| P46782 | 40S ribosomal protein S5 OS=Homo sapiens GN=RPS5 PE=1 SV=4 - [RS5_HUMAN]                                                         | 2  | 2  | 0.074 |
| C9JNW5 | Ribosomal protein L24, isoform CRA_e OS=Homo sapiens GN=RPL24 PE=4 SV=1 - [C9JNW5_HUMAN]                                         | 5  | 5  | 0.075 |
| E9PL10 | Basic Transcription Factor 3-Like 4 OS=Homo sapiens GN=BTF3L4 PE=4 SV=1 - [E9PL10_HUMAN]                                         | 6  | 6  | 0.075 |
| P11166 | Solute carrier family 2, facilitated glucose transporter member 1 OS=Homo sapiens GN=SLC2A1 PE=1 SV=2 - [GTR1_HUMAN]             | 4  | 4  | 0.075 |
| P62081 | 40S ribosomal protein S7 OS=Homo sapiens GN=RPS7 PE=1 SV=1 - [RS7_HUMAN]                                                         | 4  | 4  | 0.076 |
| B4DTI0 | ARP3 actin-related protein 3 homolog OS=Homo sapiens GN=ACTR3 PE=2 SV=1 - [B4DTI0_HUMAN]                                         | 3  | 3  | 0.077 |
| F2Z2Y4 | pyridoxal (pyridoxine, vitamin B6) kinase OS=Homo sapiens GN=PDXX PE=4 SV=1 - [F2Z2Y4_HUMAN]                                     | 4  | 4  | 0.077 |
| O60841 | Eukaryotic translation initiation factor 5B OS=Homo sapiens GN=EIF5B PE=1 SV=4 - [IF2P_HUMAN]                                    | 5  | 5  | 0.077 |
| E9PM36 | ribosomal protein S2 OS=Homo sapiens GN=RPS2 PE=3 SV=1 - [E9PM36_HUMAN]                                                          | 2  | 2  | 0.077 |
| Q99614 | Tetratricopeptide repeat protein 1 OS=Homo sapiens GN=TTC1 PE=1 SV=1 - [TTC1_HUMAN]                                              | 2  | 2  | 0.078 |
| Q04917 | 14-3-3 protein eta OS=Homo sapiens GN=YWHAH PE=1 SV=4 - [1433F_HUMAN]                                                            | 6  | 11 | 0.078 |
| D6RFZ8 | diphosphoinositol pentakisphosphate kinase 2 OS=Homo sapiens GN=PPIP5K2 PE=4 SV=1 - [D6RFZ8_HUMAN]                               | 2  | 2  | 0.078 |
| P49959 | Double-strand break repair protein MRE11A OS=Homo sapiens GN=MRE11A PE=1 SV=3 - [MRE11_HUMAN]                                    | 2  | 2  | 0.079 |
| P30044 | Peroxiredoxin-5, mitochondrial OS=Homo sapiens GN=PRDX5 PE=1 SV=4 - [PRDX5_HUMAN]                                                | 2  | 2  | 0.080 |
| P06733 | Alpha-enolase OS=Homo sapiens GN=ENO1 PE=1 SV=2 - [ENOA_HUMAN]                                                                   | 15 | 17 | 0.080 |
| E9PH51 | L-lactate dehydrogenase OS=Homo sapiens GN=LDHA PE=3 SV=2 - [E9PH51_HUMAN]                                                       | 11 | 13 | 0.081 |
| E5RJ56 | dematin OS=Homo sapiens GN=EPB49 PE=4 SV=1 - [E5RJ56_HUMAN]                                                                      | 5  | 5  | 0.081 |
| Q13765 | Nascent polypeptide-associated complex subunit alpha OS=Homo sapiens GN=NACA PE=1 SV=1 - [NACA_HUMAN]                            | 3  | 3  | 0.082 |
| P04075 | Fructose-bisphosphate aldolase A OS=Homo sapiens GN=ALDOA PE=1 SV=2 - [ALDOA_HUMAN]                                              | 15 | 20 | 0.083 |
| P11277 | Spectrin beta chain, erythrocyte OS=Homo sapiens GN=SPTB PE=1 SV=5 - [SPTB1_HUMAN]                                               | 16 | 17 | 0.083 |
| B4DEW9 | cDNA FLJ52478, highly similar to Eukaryotic translation initiation factor 3 subunit 5 OS=Homo sapiens PE=2 SV=1 - [B4DEW9_HUMAN] | 3  | 3  | 0.084 |
| Q99447 | Ethanolamine-phosphate cytidyltransferase OS=Homo sapiens GN=PCYT2 PE=1 SV=1 - [PCYT2_HUMAN]                                     | 3  | 3  | 0.085 |
| P14618 | Pyruvate kinase isozymes M1/M2 OS=Homo sapiens GN=PKM2 PE=1 SV=4 - [KPYM_HUMAN]                                                  | 8  | 9  | 0.085 |
| Q9BXL5 | Hemogen OS=Homo sapiens GN=HEMGN PE=1 SV=1 - [HEMGN_HUMAN]                                                                       | 8  | 8  | 0.086 |
| P67809 | Nuclease-sensitive element-binding protein 1 OS=Homo sapiens GN=YBX1                                                             | 4  | 4  | 0.086 |

|        |                                                                                                                       |    |    |        |
|--------|-----------------------------------------------------------------------------------------------------------------------|----|----|--------|
|        | PE=1 SV=3 - [YBOX1_HUMAN]                                                                                             |    |    |        |
| P60660 | Myosin light polypeptide 6 OS=Homo sapiens GN=MYL6 PE=1 SV=2 - [MYL6_HUMAN]                                           | 2  | 2  | 0.086  |
| Q99471 | Prefoldin subunit 5 OS=Homo sapiens GN=PFD5 PE=1 SV=2 - [PFD5_HUMAN]                                                  | 2  | 2  | 0.087  |
| P25398 | 40S ribosomal protein S12 OS=Homo sapiens GN=RPS12 PE=1 SV=3 - [RS12_HUMAN]                                           | 2  | 2  | 0.088  |
| E7EQR4 | Ezrin OS=Homo sapiens GN=EZR PE=4 SV=2 - [E7EQR4_HUMAN]                                                               | 15 | 20 | 0.089  |
| P28838 | Cytosol aminopeptidase OS=Homo sapiens GN=LAP3 PE=1 SV=3 - [AMPL_HUMAN]                                               | 5  | 5  | 0.090  |
| B4DPK8 | heterogeneous nuclear ribonucleoprotein L OS=Homo sapiens GN=HNRNPL PE=2 SV=1 - [B4DPK8_HUMAN]                        | 3  | 3  | 0.091  |
| P62750 | 60S ribosomal protein L23a OS=Homo sapiens GN=RPL23A PE=1 SV=1 - [RL23A_HUMAN]                                        | 2  | 2  | 0.092  |
| B4DFF1 | cDNA FLJ53312, highly similar to Heterogeneous nuclear ribonucleoprotein K OS=Homo sapiens PE=2 SV=1 - [B4DFF1_HUMAN] | 10 | 10 | 0.093  |
| E9PKZ0 | ribosomal protein L8 OS=Homo sapiens GN=RPL8 PE=4 SV=1 - [E9PKZ0_HUMAN]                                               | 3  | 3  | 0.094  |
| P54577 | Tyrosyl-tRNA synthetase, cytoplasmic OS=Homo sapiens GN=YARS PE=1 SV=4 - [SYYC_HUMAN]                                 | 19 | 19 | 0.094  |
| Q9H1E3 | Nuclear ubiquitous casein and cyclin-dependent kinases substrate OS=Homo sapiens GN=NUCKS1 PE=1 SV=1 - [NUCKS_HUMAN]  | 2  | 2  | 0.095  |
| B0V043 | valyl-tRNA synthetase OS=Homo sapiens GN=VAR5 PE=3 SV=1 - [B0V043_HUMAN]                                              | 2  | 2  | 0.095  |
| F5GWW0 | cathepsin B OS=Homo sapiens GN=CTSB PE=3 SV=1 - [F5GWW0_HUMAN]                                                        | 3  | 3  | 0.098  |
| Q9UHV9 | Prefoldin subunit 2 OS=Homo sapiens GN=PFD2 PE=1 SV=1 - [PFD2_HUMAN]                                                  | 4  | 4  | 0.098  |
| P62269 | 40S ribosomal protein S18 OS=Homo sapiens GN=RPS18 PE=1 SV=3 - [RS18_HUMAN]                                           | 6  | 6  | 0.099  |
| P35579 | Myosin-9 OS=Homo sapiens GN=MYH9 PE=1 SV=4 - [MYH9_HUMAN]                                                             | 42 | 53 | 0.099  |
| P00915 | Carbonic anhydrase 1 OS=Homo sapiens GN=CA1 PE=1 SV=2 - [CAH1_HUMAN]                                                  | 11 | 11 | 13.615 |
