# Supplementary material
Source: PubMed Central journal article supplement (PMC5083095)
Supplement: 10.1074_M115.057315_mcp.M115.057315-11.pdf [file 10.1074_M115.057315_mcp.M115.057315-11.pdf]

**Supplemental Table 8. Re-localisation of proteins from the cytosol to the membrane during reticulocyte maturation.** Proteins from the membrane and cytosol fraction of cells were included in the analysis. Values show the ratio of protein levels between adult RBCs and reticulocytes. For method see legend for Supplemental Table 4.

|                                                        | RBC/Retic<br>membrane | RBC/Retic<br>cytosol |
|--------------------------------------------------------|-----------------------|----------------------|
| 6-phosphofructokinase, muscle                          | 3.024                 | 0.383                |
| Ankyrin 1                                              | 3.627                 | 0.041                |
| Band 3 anion transport protein                         | 3.826                 | 0.050                |
| Dematin                                                | 2.988                 | 0.081                |
| Fructose-bisphosphate aldolase                         | 4.309                 | 0.108                |
| Glutaminyl-tRNA Synthetase                             | 3.987                 | 0.142                |
| Phosphatidylinositol-5-phosphate 4-kinase type-2 alpha | 2.069                 | 0.433                |
| Proteasome activator complex subunit 1                 | 3.067                 | 0.388                |
| Proteasome activator complex subunit 2                 | 2.151                 | 0.485                |
| Proteasome subunit alpha type-3                        | 2.712                 | 0.478                |
| Proteasome subunit alpha type-4                        | 2.055                 | 0.483                |
| Proteasome subunit alpha type-6                        | 3.356                 | 0.484                |
| Proteasome subunit alpha type-7                        | 2.921                 | 0.484                |
| Proteasome subunit beta type-4                         | 3.065                 | 0.462                |
| Proteasome subunit beta type-6                         | 2.764                 | 0.499                |
| Protein 4.1                                            | 3.289                 | 0.143                |
| Protein argonaute-2                                    | 4.027                 | 0.221                |
| Sorbitol dehydrogenase                                 | 12.996                | 0.151                |
| Spectrin alpha chain, erythrocyte                      | 4.681                 | 0.106                |
| Spectrin beta chain                                    | 4.470                 | 0.083                |
| Tropomyosin 1 isoform 6                                | 2.520                 | 0.043                |
