# Supplementary material
Source: PubMed Central journal article supplement (PMC5083095)
Supplement: 10.1074_M115.057315_mcp.M115.057315-12.pdf [file 10.1074_M115.057315_mcp.M115.057315-12.pdf]

**Supplemental Table 9. Re-localisation of proteins in the band 3-ankyrin macro-complex and 4.1R junctional complex from the cytosol to the membrane during reticulocyte maturation.** Proteins from the membrane and cytosol fraction of cells were included in the analysis. Values show the ratio of protein levels between adult RBCs and reticulocytes and cord RBCs and reticulocytes. For method see legend for Supplemental Table 4.

| Accession | Description                         | Adult RBC/Retic Membrane | Adult RBC/Retic Cytosol | Cord RBC/Retic Membrane | Cord RBC/Retic Cytosol |
|-----------|-------------------------------------|--------------------------|-------------------------|-------------------------|------------------------|
| P60709    | Actin, cytoplasmic 1                | 3.062                    |                         | 2.862                   |                        |
| P63267    | Actin, gamma-enteric smooth muscle  | 3.117                    | 0.115                   | 2.624                   | 0.078                  |
| A2A3N8    | Adducin (alpha)                     | 3.273                    | 0.148                   | 2.918                   | 0.349                  |
| P35612    | Adducin (beta)                      | 4.433                    |                         | 3.571                   |                        |
| E7EVE3    | Ankyrin 1                           | 3.627                    | 0.041                   | 3.927                   | 0.391                  |
| Q53ER1    | Ankyrin 1 isoform 5 variant         | 3.997                    |                         | 3.449                   |                        |
| P02730    | Band 3 anion transport protein      | 3.826                    | 0.050                   | 3.604                   | 0.480                  |
| E9PB22    | CD47                                | 5.260                    |                         | 5.309                   |                        |
| Q08495    | Dematin                             | 2.988                    | 0.081                   | 3.044                   | 0.095                  |
| B4DZV5    | 55 kDa erythrocyte membrane protein | 1.528                    | 0.177                   | 1.643                   | 0.329                  |
| B8Q185    | Glycophorin A                       | 10.251                   |                         | 11.878                  |                        |
| P04921    | Glycophorin-C                       | 2.684                    | 0.010                   | 2.892                   | 0.132                  |
| Q14773    | Intercellular adhesion molecule 4   | 2.414                    |                         | 4.418                   |                        |
| P23276    | Kell blood group glycoprotein       | 3.245                    |                         | 2.189                   |                        |
| P51811    | Membrane transport protein XK       | 2.411                    |                         | 2.520                   |                        |
| P11171    | Protein 4.1                         | 3.289                    | 0.143                   | 3.928                   | 0.614                  |
| Q4KKX0    | Protein 4.2                         | 4.086                    | 0.010                   | 4.011                   | 0.098                  |
| F5H250    | RhAG Ammonium transporter           | 1.431                    |                         | 5.235                   |                        |
| E7EWZ5    | Rh blood group, CcEe antigens       | 5.054                    |                         | 4.499                   |                        |
| Q02161    | Blood group Rh(D) polypeptide       | 2.872                    |                         | 8.032                   |                        |
| P11166    | GLUT1                               | 1.803                    | 0.075                   | 2.627                   | 0.246                  |
| P02549    | Spectrin alpha chain, erythrocyte   | 4.681                    | 0.106                   | 4.164                   | 0.221                  |
| P11277    | Spectrin beta chain, erythrocyte    | 4.470                    | 0.083                   | 4.109                   | 0.577                  |
| P28289    | Tropomodulin-1                      | 3.518                    |                         | 3.770                   |                        |
| F5H7S3    | Tropomyosin 1                       | 2.579                    |                         | 2.786                   |                        |
| D9YZV5    | Tropomyosin 1 isoform 4             | 2.411                    | 0.059                   | 2.253                   | 0.279                  |
| D9YZV7    | Tropomyosin 1 isoform 6             | 2.520                    | 0.043                   | 2.409                   | 0.116                  |
| Q5VU58    | Tropomyosin 3                       | 2.842                    | 0.083                   | 3.021                   | 0.120                  |
